# Supplementary material for: Is it worth the extra mile? Comparing environmental DNA and RNA metabarcoding for vertebrate and invertebrate biodiversity surveys in a lowland stream
Source: PeerJ. 2024 Oct 24;12:e18016. doi: 10.7717/peerj.18016 (PMC11512801; doi:10.7717/peerj.18016)
Supplement: Supplemental Information 6 [file peerj-12-18016-s006.xlsx]

## Sheet: TaXon table
ID	Phylum	Class	Order	Family	Genus	Species	Similarity	Status	seq	LDNA_10_A	LDNA_10_B	LDNA_11_A	LDNA_11_B	LDNA_12_A	LDNA_12_B	LDNA_13_A	LDNA_13_B	LDNA_14_A	LDNA_14_B	LDNA_15_A	LDNA_15_B	LDNA_16_A	LDNA_16_B	LDNA_17_A	LDNA_17_B	LDNA_18_A	LDNA_18_B	LDNA_19_A	LDNA_19_B	LDNA_1_A	LDNA_1_B	LDNA_2_A	LDNA_2_B	LDNA_3_A	LDNA_3_B	LDNA_4_A	LDNA_4_B	LDNA_5_A	LDNA_5_B	LDNA_6_A	LDNA_6_B	LDNA_7_A	LDNA_7_B	LDNA_8_A	LDNA_8_B	LDNA_9_A	LDNA_9_B	LDNA_ENC_A	LDNA_ENC_B
OTU_1	Chordata	Actinopteri	Gobiiformes	Gobiidae	Neogobius	Neogobius melanostomus	100	Midori2	GCGGTTATACGAGAGGCCCAAGTTGACAAAAATCGGCGAAAAGCGTGGTTAGTGATATCACCTCCACTAAAGCCAAACACCTTCAAGGCTGTAATACGCCCCCGAAGACAGGAAGCCCAATCACGAAAGTAGCTTTAATTTTCATGAAGCCACGAAAGCTAGGAAA	1139488	1360105	1304752	1304782	1394888	1860986	1358142	1028020	1241654	1288844	1359294	1478650	977592	951455	1258318	1395453	1230689	1289387	1139082	960610	1043350	1271672	941795	1155111	1057431	909112	1444385	1285410	1091299	1392644	1373955	1157462	1630497	1318712	1087446	1146117	1093464	1522301	43	511328
OTU_2	Chordata	Actinopteri	Perciformes	Percidae	Perca	Perca fluviatilis	100	Midori2	GCGGTTATACGAGAGGCCCAAGTTGATAGACATCGGCGTAAAGCGTGGTTAAGATTAAAGACAATACTAAAGCCGAACACCTTCAGAGCTGTTATACGCATCCGAAGGTAAGAAGTTCAACCACGAAAGTGGCTTTATAGCCCCTGAACCCACGAAAGCTACGATA	777565	949575	358258	450503	262177	362248	479794	389271	366942	296790	336083	480129	465071	433211	455003	528101	618723	430793	536228	275966	124198	542401	392550	261381	463598	335533	431326	397814	410415	566512	339111	320462	563049	485598	469267	423740	307314	331762	5	4
OTU_3	Chordata	Actinopteri	Cypriniformes	Leuciscidae	Abramis	Abramis brama	100	Midori2	GCGGTTAAACGAGAGGCCCCAGTTAATAATACACGGCGTAAAGGGTGGTTAAGGAAAGTATTAACAATAAAGCCGAATGGCCCTTTGGCTGTCATACGCTTCTAGGTGTCCGAAGTTCAACATACGAAAGTAGCTTTAATAACGCCCACCTGACCCCACGAAAGCTGAGAAA	450483	520094	573651	657183	809498	918349	494134	668640	522704	702836	657682	550828	420362	448814	637251	678810	622825	570567	738779	645457	851409	718498	492736	702128	638614	553153	893023	766410	584797	766556	962675	539634	903131	836773	506292	552850	534125	918307	2	365568
OTU_4	Chordata	Actinopteri	Cypriniformes	Leuciscidae	Leuciscus	Leuciscus leuciscus/idus	100	manual check	GCGGTTAAACGAGAGGCCCTAGTTAATAATACACGGCGTAAAGGGTGGTTAAGGAAAGCATAACAATAAAGCCGAATGGCCCTTTGGCTGTCATACGCTTCTAGGTGTCCGAAGCCCAATATACGAAAGTAGCTTTAATAAAGCCCACCTGACCCCACGAAAGCTGAGAAA	89774	140687	143410	148518	99114	83943	99506	102665	114707	175403	147363	157899	229633	197796	179238	263271	136434	171317	146512	167855	118531	270172	68118	47054	44675	116161	94303	101097	68865	62743	122806	138548	221574	163156	94903	45568	89301	103180	0	2
OTU_5	Chordata	Actinopteri	Cypriniformes	Cyprinidae	Cyprinus	Cyprinus carpio	100	manual check	GCGGTTAGACGAGAGGCCCTAGTTGATATTACAACGGCGTAAAGGGTGGTTAAGGATAAACAAAAATAAAGTCAAATGGCCCCTTGGCCGTCATACGCTTCTAGGAGTCCGAAGCCCTAATACGAAAGTAACTTTAATAAACCCACCTGACCCCACGAAAGCTGAGAAA	83078	158143	188309	207678	254270	205345	257246	189545	148577	182072	181817	292256	232948	245038	292533	206703	268596	197327	194967	161830	51026	4	32922	36368	86647	117968	81998	105461	157109	163405	198543	124276	158509	206334	100117	113692	118744	80030	169323	1
OTU_6	Chordata	Actinopteri	Perciformes	Gasterosteidae	Gasterosteus	Gasterosteus aculeatus	100	Midori2	GCGGTTATACGAGAGGCCCAAGTTGATGAATTACGGCGTAAAGAGTGGTTAAGCTAAAATTAAAACTAAAGCCGAACACCCCCAAAGCTGTTATACGCATCCGGAGGTGAGAAGTTCAACCACGAAGGTGGCTTTATCTAACCTGAACCCACGAAAGCTACGGCA	65445	66121	174385	123743	141591	155707	50258	49384	44357	92461	73580	48897	113811	69764	121062	99170	57844	68708	72295	101976	15	133208	143853	176914	61428	32718	117975	91059	148626	130176	82333	57290	90273	78578	128732	99401	213222	383309	111335	2
OTU_7	Chordata	Actinopteri	Anguilliformes	Anguillidae	Anguilla	Anguilla anguilla	100	manual check	GCGGTTATACGAGGGGCTCAAATTGATATTACACGGCGTAAAGCGTGATTaaaaaacaaaaaaaCTAAAGCCAAACACTTCCCAAGCTGTCATACGCTACCGGAACATAAACGAAGCCCTATAACGAAAGTAGCTTTAACACCTTTGAACTCACGACAGTTGAGGAA	74277	98269	47544	113995	47356	62075	144282	40680	73943	73021	13549	260404	88878	26118	111459	68077	66613	44235	83083	27137	111360	12289	56354	58212	83381	40799	60964	84285	55420	41508	33568	55666	114287	92973	38162	13101	68614	82647	1	1
OTU_8	Chordata	Actinopteri	Perciformes	Percidae	Sander	Sander lucioperca	100	manual check	GCGGTTATACGAGAGGCCCAAGTTGATAGACATCGGCGTAAAGCGTGGTTAAGACAAAAACAAAACTAAAGCCGAACACCTTCAGAGCTGTTATACGCACCCGAAGGTAAGAAGTTCAACCACGAAAGTGGCTTTATTACCCCTGAACCCACGAAAGCTACGATA	57355	129897	55529	80222	38832	23113	60127	59481	66138	51518	72588	54082	24364	10863	21946	77980	88858	104383	75358	43885	73185	2	11153	14184	42616	25861	65334	69884	29694	90292	63498	49205	84707	22079	52268	57699	44806	38535	1	0
OTU_9	Chordata	Mammalia	Primates	Hominidae	Homo	Homo sapiens	100	Midori2	GCGGTCACACGATTAACCCAAGTCAATAGAAGCCGGCGTAAAGAGTGTTTTAGATCACCCCCTCCCCAATAAAGCTAAAACTCACCTGAGTTGTAAAAAACTCCAGTTGACACAAAATAGACTACGAAAGTGGCTTTAACATATCTGAACACACAATAGCTAAGACC	26175	74186	28309	37351	43017	19122	58742	24836	18016	80738	53592	27044	11558	36323	52949	62292	8128	22692	203150	142587	120466	136045	408997	358755	328930	277612	66312	3662	40044	88428	48804	20903	100095	27463	40669	22880	23327	65548	190558	252367
OTU_10	Chordata	Actinopteri	Cypriniformes	Cyprinidae	Barbus	Barbus barbus	99.412	Midori2	GCGGTTAGACGAGAGGCCCTAGTTGATATTATAACGGCGTAAAGGGTGGTTAGGGATAAATAATAATAAAGCCAAATGGCCCCTTGGCCGTCATACGCTTCTAGGTGTCCGAGGCCCTATATACGAAAGTAGCTTTAATTAACCCGCCTGACCCCACGAAAACTGAGAAA	25389	31432	107013	69955	27235	21946	99014	74723	49697	29836	67855	38218	61185	39234	45495	65593	36951	40208	35429	40037	5	66221	108775	143357	62613	40796	41357	99495	43367	62366	70074	42718	21678	43888	37465	23798	35480	60173	0	1
OTU_11	Chordata	Actinopteri	Gobiiformes	Gobiidae	Ponticola	Ponticola kessleri	100	Midori2	GCGGTTATACGAGAGGCCCGAGTTGACAAACATTCGGCGTAAAGCGTGGTTAATAACTTATTTACTAAAGCCAAACACCTTTAAGGCTGTTATACGCCCCCAAAGGTAGGAAGACCCCTCACGAAAGTAGCTTTAATTACTATGAATCCACGAAAGCTAGGAAA	35645	43965	69945	106782	12113	14424	32214	19592	17866	80859	41262	19318	27874	35516	21242	36422	31121	66168	55676	26288	65384	0	56922	59844	33656	33125	22443	14673	23143	51235	45710	18307	30983	39267	43275	39838	34007	50142	1	1
OTU_12	Chordata	Mammalia	Rodentia	Cricetidae	Microtus	Microtus arvalis	100	Midori2	GCGGTCATACGATTAACCCAAACTAATTATTCTCGGCGTAAAACGTGTTACTAGAAATATGCAAAATAGAATTAAAATCCATCCAATATGTGAAAATTCATCGCTGGACCTAAAACCAATGACGAAAGTAATTCTAATAAGCCTGATACACGATAGCTAAGGTA	5	0	0	1	24238	13584	17	81526	71203	147004	73249	5	0	1	0	3756	6664	3317	29000	9347	1	1	1	1	2	1	4	4	5	6	9955	1	0	1	0	3854	1	2611	0	0
OTU_13	Chordata	Actinopteri	Cypriniformes	Leuciscidae	Rutilus	Rutilus rutilus	98.83	Midori2	GCGGTTAAACGAGAGGCCCTAGTTAATAATACACGGCGTAAAGGGTGGTTAAGGGAAGCACAATAATAAAGCCAAATGGCCCTTTGGCTGTCATACGCTTCTAGGTGTCCGAAGCCCAATATACGAAAGTAGCTTTAATAAAGCCCACCTGACCCCACGAAAGCTAGGAAA	98088	140403	37501	59787	24057	60803	71612	69231	97876	129783	71817	124061	135177	72583	63547	89172	87936	128931	82827	83861	907	110125	35066	31975	80155	86723	28118	60761	34288	57321	61557	40211	95563	91293	30907	44764	83196	66222	1	0
OTU_14	Chordata	Mammalia	Artiodactyla	Bovidae	Bos	Bos taurus	100	manual check	GCGGTCATACGATTAACCCAAGCTAACAGGAGTACGGCGTAAAACGTGTTAAAGCACCATACCAAATAGGGTTAAATTCTAACTAAGCTGTAAAAAGCCATGATTAAAATAAAAATAAATGACGAAAGTGACCCTACAATAGCCGACGCACTATAGCTAAGACC	41186	19409	55727	23309	32911	86442	106751	16631	25596	46507	41194	19658	17921	27502	1861	39449	15704	33480	15401	20542	134165	77561	10731	18494	54984	6717	13026	10284	37018	26599	3315	14366	30409	24255	46343	20001	42418	25834	0	0
OTU_15	Chordata	Mammalia	Rodentia	Myocastoridae	Myocastor	Myocastor coypus	100	Midori2	GCGGTCATACGATTAACCCTAATTAATAAACCCCGGCGTAAAGAGTATTAAAGATACAATAAAAATAAGATTAAATTTCATCTGGGTCGTAAAAAACTATAGATAAAAATAAAATCGATAACGAAGGTAATCTTAATATATCAGAATATACTAAAGCTAAGACA	3961	13202	30616	41099	9660	2	600	6141	4298	9129	6059	5923	11319	13832	11416	13435	8449	2	1841	13795	1	0	19658	12193	0	8257	7968	5578	3940	13982	10089	19999	5756	10123	5112	15690	23576	20858	0	0
OTU_16	Chordata	Actinopteri	Siluriformes	Siluridae	Silurus	Silurus glanis	100	Midori2	GCGGTTATACGAAAGACCCTAGTTAATAGCCACGGCGTAAAGGGTGGTTAAGGAATATAACAAATAAAGCTAAAGACCCTCTAAGCCGTTATACGCACTCCGAGGACACGAAGCCCAAACACGAAAGTAGCTTTAAACCCCTCCTGACTCCACAAAAGCTAAGAAA	1	6636	1	16228	20360	4266	108235	6131	22111	2	0	18647	1	7992	8440	30951	1	30839	3382	2639	1	73162	12301	12981	25081	9667	16828	8148	8476	12443	23005	15141	3747	27774	0	13723	4803	1	0	0
OTU_17	Chordata	Actinopteri	Cypriniformes	Leuciscidae	Rutilus	Rutilus rutilus	97.661	Midori2	GCGGTTAAACGAGAGGCCCTAGTTAATAATACACGGCGTAAAGGGTGGTTAAGGGAAGCACAATAATAAAGCCAAATGGCCCTTTGGCTGTCATACGCTTCTAGGTGTCCGAAGTTCAACATACGAAAGTAGCTTTAATAACGCCCACCTGACCCCACGAAAGCTGAGAAA	1689	2014	895	1204	794	1225	1028	1619	1999	2837	1920	2756	2491	1706	1476	1922	2043	3196	2589	2248	731	914	750	682	1858	1948	1846	1794	700	1077	2522	1617	4445	3144	934	1255	1662	1533	0	0
OTU_18	Chordata	Mammalia	Rodentia	Cricetidae	Ondatra	Ondatra zibethicus	100	Midori2	GCGGTCATACGATTAACCCAAACTAATTATTCTCGGCGTAAAACGTGTTACTAGGAAACCAAAAATAGAATTAAAAACCATCCAATATGTGAAAATTCATCGCTGGACCTAAAACCAATGACGAAAGTAATTCTAGAATTCTTGACACACGATAGCTAAGATC	1	0	24040	0	0	1	0	9818	2518	1	6476	0	2262	0	5247	5902	15722	3	1	5878	0	0	0	13760	4834	13256	1	0	0	2714	16573	13159	0	8161	4866	0	0	4020	0	0
OTU_19	Chordata	Mammalia	Rodentia	Castoridae	Castor	Castor fiber	100	Midori2	GCGGTCATACGATAGACCCAAACTAATAAACCCCGGCGTAAAGCGTGTTTAAGAGCCTTACCCTGAATAAGAATAAACTTTACCTAGGCCGTAAAAAGCTATAGCTAAGGAAAAAATAACTTACGAAAGTAATCTTAATAAGTCTGATAACACGACAGCTAAGACC	4984	12282	22959	14908	0	3685	8647	8022	0	16169	7459	13736	11919	2425	14655	17328	9477	0	10394	5770	2	0	7320	0	0	0	7	18304	6928	0	1	0	2	0	8126	0	0	4777	0	0
OTU_20	Chordata	Actinopteri	Esociformes	Esocidae	Esox	Esox lucius	100	Midori2	GCGGTTATACGAGAGGCCCTAGTTGATAATTGTCGGCGTAAAGAGTGGTTTAGAAAATAATTTAATAAAGCCGAACACCTCCTCAGTTGTTATACACATTTGAAGATATGAAGCCCTACCGCGAAAGCAGCTTTAAGTATCCTGAACCCACGACAGCTATGGTA	0	0	20475	0	0	12978	11188	1	0	0	0	9946	3296	1	0	0	0	2	3326	330	37984	0	3652	3723	0	5094	0	216	1	0	11187	14581	1919	5093	1352	1	0	19411	0	0
OTU_21	Chordata	Actinopteri	Cypriniformes	Tincidae	Tinca	Tinca tinca	100	Midori2	GCGGTTAAACGAGAGGCCCTAGTTGATATTACTACGGCGTAAAGGGTGGTTAAGGAAAGCATTATAATAAAGCCAAATGGCCCCTTGGCCGTCATACGCTTCTAGGTGCCCGAAGCCCAACCACACGAAAGTAGCTTTAACAAAGCCCACCTGACCCCACGAAAGCTGAGAAA	0	21377	0	12075	0	1	0	1	0	0	1	6783	0	0	4825	0	0	0	0	0	0	0	0	11328	0	0	2092	1	1	0	0	4367	7761	1	0	0	0	0	0	0
OTU_22	Chordata	Actinopteri	Gobiiformes	Gobiidae	Neogobius	Neogobius fluviatilis	100	Midori2	GCGGTTATACGAGAGGCCCAAGTTGACAAAGATCGGCGTAAAGCGTGGTTAATGATAATTCCACTAAAGCCAAACACCTTCAAGGCTGTAATACGCCCCCGAAGACAGGAAGACCCATCACGAAAGTAGCTTTAATCTTCATGAACCCACGAAAGCTAGGAAA	3619	12445	1	0	0	0	0	9857	3788	0	0	0	1	6133	0	0	2121	2834	1	0	0	0	0	0	11123	0	0	7740	0	1	7104	0	0	12093	10398	0	0	14558	0	1
OTU_23	Chordata	Actinopteri	Cypriniformes	Gobionidae	Gobio	Gobio gobio	100	Midori2	GCGGTTAAACGAGAGGCCCTAGTTGATTTTATCACGGCGTAAAGGGTGGTTAAGGAAGACAAAACAATAAAGCCGAATGGCCCTTTGGCCGTCATACGCTTCTAGGTGTCCGAAGCCCAATAGTACGAAAGTAGCTTTAATAAAACCCACCTGACCCCACGAAAGCTAAGAAA	11754	7874	9590	0	10537	1	3506	0	9994	8229	24331	0	5863	0	0	10653	8919	19579	6892	4739	0	0	0	0	0	0	1	0	1578	18656	14455	1	0	8545	0	0	0	0	0	0
OTU_24	Chordata	Mammalia	Carnivora	Canidae	Canis	Canis lupus	100	Midori2	GCGGTCATACGATTAACCCAAACTAATAGGCCTACGGCGTAAAGCGTGTTCAAGATACTTTTACACTAAAGTTAAAACTTAACTAAGCCGTAAAAAGCTACAGTTATCATAAAATAAACCACGAAAGTGACTTTATAATAATCTGACTACACGATAGCTAAGACC	3482	5869	7653	0	0	2160	0	0	0	0	0	1	0	0	0	0	0	2	1	0	1	39526	0	0	0	0	0	2	13968	2235	0	0	1593	0	10728	3777	0	0	0	0
OTU_25	Chordata	Aves	Columbiformes	Columbidae	Columba	Columba palumbus	100	Midori2	GCGGTCACACAAGAGACCCAAACTAATCGTTCACGGCGTAAAGAGTGGACTCATGCTTATCGCATTAATTAAGGTCAAAACGCAGCTGAGCTGTCATAAGCTTAAGGTGCACTTAAAACCGCCCTAAATACGACCCTAAACTCATACGACTCAATGAACTCCACGAAAGCCAGGGTA	5723	0	7151	3906	8375	1	1	712	1	3786	2580	0	833	9902	0	0	4963	6517	0	4291	0	0	0	8768	1827	0	9152	3794	0	2910	2072	0	1	5653	2680	1	4441	0	0	0
OTU_26	Chordata	Actinopteri	Cypriniformes	Leuciscidae	Alburnus	Alburnus alburnus	98.246	Midori2	GCGGTTAAACGAGGGGCCCTAGTTAATAATACGCGGCGTAAAGGGTGGTTAAGGAAAGCATAACAATAAAGCCGAGTGGCCCTTTGGCTGTCATACGCTTCAAGGTGTCCGAAGCCCAATATACGAAAGCAGCTTTAATAAGGCCCACCTGACCCCACGAAAGCTGAGGAA	0	0	16	3	2	19	7	5	1	0	10	5	1	1	0	3	10	3	0	2	40	1	14	1	0	0	0	0	0	5	3	2	3	0	1	5	3	11	0	0
OTU_27	Chordata	Mammalia	Artiodactyla	Suidae	Sus	Sus scrofa	100	Midori2	GCGGTCATACGATTAACCCAAATTAATAGATCCACGGCGTAAAGAGTGTTTAAGaaaaaaaaTCACAATAGAGTTAAATTATAACTAAGCTGTAAAAAGCCCTAGTTAAAATAAAATAACCCACGAAAGTGACTCTAATAATCCTGACACACGATAGCTAGGACC	0	0	16427	1	0	15074	9799	0	12821	966	0	1450	2031	0	4002	0	0	1	0	0	0	0	0	1	0	0	1707	1029	4796	0	0	298	481	0	0	0	0	5067	0	0
OTU_28	Chordata	Mammalia	Rodentia	Muridae	Rattus	Rattus norvegicus	100	Midori2	GCGGTCATACGATTAACCCAAACTAATTATTTTCGGCGTAAAACGTGCCAACTATAAATCTCATAATAGAATTAAAATCCAACTTATATGTGAAAATTCATTGTTAGGACCTAAGCCCAATAACGAAAGTAATTCTAATCATTTATATAATGCACGATAGCTAAGACC	0	0	1012	0	0	1	1	0	0	2686	1489	0	0	0	1	1	0	0	0	0	44187	0	0	0	0	0	0	0	0	0	0	0	0	0	0	0	1323	1999	0	0
OTU_29	Chordata	Actinopteri	Cypriniformes	Leuciscidae	Alburnus	Alburnus alburnus	98.246	Midori2	GCGGTTAAACGAGGGGCCCTAGTTAATAATACGCGGCGTAAAGGGTGGTTAAGGAAATCAAACAATAAAGCCGAATGGCCCTTTGGCTGTCATACGCTTCTAGGTGTCCGAAGCCCAATATACGAAAGTAGCTTTAATAATGCCCACCTGACCCCACGAAAGCTGAGGAA	0	0	94	26	19	119	33	43	1	1	74	38	33	4	0	33	98	33	4	19	118	0	134	2	0	0	206	0	5	51	11	11	44	0	52	19	43	82	0	0
OTU_30	Chordata	Actinopteri	Cypriniformes	Nemacheilidae	Barbatula	Barbatula barbatula	99.401	manual check	GCGGTTATACGAGAGGCCCAAGTTGATAGGCACGGCGTAAAGGGTGGTTAAGGAAAGCATAAATAAAGCCAAAGGGCCTCCCGGCCGTCATACGCTCCCGAGTGTCCGAAGCCCCTAAACGAAAGTAGCTTTAGTACCGCCCACCTGACCCCACGAAAACTGAGAAA	0	0	0	8657	0	0	0	0	0	1517	0	17532	0	11089	0	0	0	0	0	0	0	0	0	0	9697	8042	0	0	0	0	0	0	15207	3532	0	0	0	0	0	0
OTU_31	No Match	No Match	No Match	No Match	No Match	No Match	No Match	Midori2	TCTCTTTGCTGGCAGCCCTGTGATGCGGGCCGACAGGCTGGGACTCAGGCTGTGGATGGCTGAAGGTCAGACCTGTTGACCAGCTGCAGACAGTTTGGTGACTGTCACTTGCATGAATTGTTGTGTGCAGTTTGAAGTTAACTGACACTAGGAACCACCTCGTCCCCGCCTA	1621	1742	3408	3209	3517	3473	2933	1656	1759	2958	2289	3233	2221	3008	1849	2745	2249	2382	3158	2926	622	48	1519	2162	1921	1971	1861	1863	2190	3022	3306	2547	1854	2434	2095	1798	1867	2086	0	0
OTU_32	Chordata	Mammalia	Rodentia	Muridae	Apodemus	Apodemus sylvaticus	100	Midori2	GCGGTCATACGATTAACCCAAACTAATTACTTCTCGGCGTAAAACGTGCTAACTAGAAACAACAAATAGAACTAAAATCCAACTAATATGTGAAAATTCATTGTTAGGACCTAAGCTCAATAACGAAAGTAGTTCTAATAATTCTACCCTGCACGATAGCTAAGATC	0	0	16936	2072	0	14095	0	0	0	0	0	0	0	0	75	0	0	0	8807	5672	0	0	0	0	0	0	0	5001	1	0	0	384	1	0	0	1	0	0	0	0
OTU_33	Chordata	Actinopteri	Perciformes	Gasterosteidae	Pungitius	Pungitius pungitius	100	manual check	GCGGTTATACGAGAGGCCCAAGTTGATGAACATCGGCGTAAAGAGTGGTTAAGCTAAAATTAAAACTAAAGCCGAACGTCCCCAAAGCTGTTATACGCACCCGGGGGTAAGAAGTTCAACCACGAAGGTGGCTTTATTAAACCTGAACCCACGAAAGCTACGGCA	0	13725	0	0	0	1	0	0	0	0	0	0	0	0	0	1	0	0	0	0	1	0	0	0	16977	121	0	7948	0	13173	0	0	0	0	0	4625	0	0	0	0
OTU_34	Chordata	Aves	Gruiformes	Rallidae	Fulica	Fulica atra	100	Midori2	GCGGTCATACAAGAAGCCCAAATTAACCGTCACCCGGCGTAAAGAGTGGTAACTTACTATTATCTAACTAGGATCAAAGTACAACTAAGCTGTCATAAGCCCATGATGTACCTAAAACCACCCTAAAAACGATCCTAGCACTAACGATCAACTAAACACCACGAAAGCCAAGACA	0	3916	0	3629	4101	1985	0	0	0	0	0	0	0	0	3247	0	1689	1	0	4358	0	0	0	0	0	0	0	0	0	3595	1583	0	0	0	2029	0	1	0	0	0
OTU_35	Chordata	Actinopteri	Pleuronectiformes	Pleuronectidae	Platichthys	Platichthys flesus	100	manual check	GCGGTTATACGAGAGGCCCAAGTTGACAAACAACGGCGTAAAGAGTGGTTAGGGGATTTACTAAACTAGAGCCGAACGCTTTCAAAGCTGTTATACGCACCCGAAAGTATGAAACCCAATTACGAAAGTAGCTCTACCTATCCTGAACCCACGAAAGCTAAGGAA	0	0	0	0	0	0	0	4084	0	13843	0	0	0	0	0	0	0	0	0	8718	0	0	0	0	0	0	1	0	0	7329	0	0	1	0	0	6520	0	0	0	0
OTU_36	Chordata	Actinopteri	Cypriniformes	Leuciscidae	Alburnus	Alburnus alburnus	98.246	Midori2	GCGGTTAAACGAGGGGCCCTAGTTAATAATACGCGGCGTAAAGGGTGGTTAAGGATCATAACAATAAAGCCGAATGGCCCTTTGGCTGTCATACGCTTCTAGGTGTCCGAAGCCCAATATACGAAAGTAGCTTTAATAAGGCCCACCTGACCCCACGAAAGCTGAGGAA	0	1	567	159	75	504	247	112	8	1	247	171	187	1	2	191	370	118	33	102	961	4	397	0	0	1	3321	5	6	317	65	57	76	0	283	86	240	431	0	0
OTU_37	Chordata	Mammalia	Primates	Hominidae	Pan		96.988	Midori2	GCGGTCACACGATTAACCCAAGTCAATAGAAACCGGCGTAAAGAGTGTTTTAGATCAATTCCCCTCAATAAAGCTAAAATTCACCTGAGTTGTAAAAAACTCCAGTTGATACAAAATAAACGACGAAAGTGGCTTTAACGCATCTGAACACACAATAGCTAAGACC	0	0	0	0	0	0	0	0	0	14062	0	0	0	0	0	0	0	0	0	20930	0	0	0	0	0	13350	0	0	0	1	0	0	0	6416	0	0	0	0	0	0
OTU_38	Chordata	Actinopteri	Cypriniformes	Leuciscidae	Chondrostoma	Chondrostoma nasus	97.674	Midori2	GCGGTTAAACGAGAGGCCCCAGTTAATAATACACGGCGTAAAGGGTGGTTAAGGAAAGTATTAACAATAAAGCCGAATGGCCCTTTGGCTGTCATACGCTTCTAGGTGTCCGAAGCCCGTTATACGAAAGTAGCTTTAACAAAGCCCACCTGACCCCACGAAAGCTGAGAAA	62	321	245	262	25	12	11	103	23	29	74	341	36	16	31	43	20	376	16	26	11	2472	16	28	124	18	787	32	302	9	1020	19	1403	105	7	178	65	11	0	0
OTU_39	Chordata	Actinopteri	Cypriniformes	Gobionidae	Romanogobio	Romanogobio albipinnatus	99.422	Midori2	GCGGTTAAACGAGAGGCCCCAGTTGATTTTATCACGGCGTAAAGGGTGGTTAAGGAAAACAAGATAATAAAGCCAAATGGCCCTTTGGCCGTCATACGCTTCTAGGTGTCCGAAGCCCAATCACACGAAAGTAGCTTTAACAAAATTTGCCTGACCCCACGAAAGCTAAGGAA	0	0	0	32383	0	0	0	0	0	0	0	0	0	0	0	0	0	0	0	0	0	0	0	0	0	0	0	0	0	0	0	0	0	0	0	18830	0	0	0	0
OTU_40	Chordata	Actinopteri	Cypriniformes	Leuciscidae	Rutilus	Rutilus rutilus	97.674	Midori2	GCGGTTAAACGAGAGGCCCTAGTTAATAATACACGGCGTAAAGGGTGGTTAAGGGGAGCACAAATAAAGCCAAATGGCCCTTTTGGCTGTCATACGCTTCTAGGTGTCCGAAGCCCAATATACGAAAGTAGCTTTAATAAAGCCCACCTGACCCCACGAAAGCTGAGAAA	237	379	70	176	16227	3481	9122	2224	21398	30571	13031	27008	6414	1064	395	5381	24556	13179	216	1985	44437	226	70	75	792	231	42	197	71	14117	201	13989	240	7453	18222	14539	5434	151	1	0
OTU_41	Chordata	Mammalia	Rodentia	Cricetidae	Arvicola	Arvicola amphibius	99.39	Midori2	GCGGTCATACGATTAACCCAAACTAACTATTCTCGGCGTAAAACGTGTTACTAGACATATAAAAAATAGAATTAAAATCCATCCAATATGTGAAAATTCATCGCTGGACCTAAAACCAATGACGAAAGTAATTCTAGTATACTTGATACACGATAGCTAAGATC	0	0	0	5281	7366	0	0	0	0	0	0	1	0	0	720	0	0	0	0	0	0	0	0	1171	0	0	2905	0	0	0	0	0	0	0	0	620	0	5514	0	0
OTU_42	Chordata	Actinopteri	Cypriniformes	Gobionidae	Pseudorasbora	Pseudorasbora parva	100	manual check	GCGGTTAAACGAGAGGCCCTAGTTGATAATATTACGGCGTAAAGGGTGGTTAAGGAAAATAAATTAATAAAGCCAAATGGCCCTTTGGCCGTCATACGCTCCTAGGTGTCCGAGGCCCGATTTTACGAAAGTAGCTTTAACATAATTAACCTGACCCCACGAAAGCTGAGAAA	0	0	0	0	0	0	0	0	1	0	0	0	0	0	5309	9468	1481	1	0	0	0	0	0	0	0	0	0	0	0	0	4390	0	0	3857	0	0	0	0	0	0
OTU_43	Chordata	Actinopteri	Cypriniformes	Leuciscidae	Abramis	Abramis brama	97.11	Midori2	GCGGTTAAACGAGAGGCCCTAGTTAATAATACACGGCGTAAAGGGTGGTTAAGGAAAACATAACAATTAAAGCCGAATGGCCCTTTGGCTGTCATACGCTTCTAGGTGTCCGAAGTTCAACATACGAAAGTAGCTTTAATAACGCCCACCTGACCCCACGAAAGCTGAGAAA	1563	1495	1059	868	1002	2972	1009	1146	826	2412	1998	2260	1139	2487	744	1304	1961	2082	1446	1338	869	26	987	1644	607	902	2858	2132	1786	1415	2335	1354	4840	1919	1778	1388	1612	1480	0	0
OTU_44	Chordata	Actinopteri	Cypriniformes	Leuciscidae	Leuciscus	Leuciscus aspius	98.246	Midori2	GCGGTTAAACGAGAGGCCCTAGTTAATAATACACGGCGTAAAGGGTGGTTAAGGAAAGCATAACAATAAAGTCGAATGGCCCCTTGGCTGTCATACGCTTCTTGTCCGAAGCCCAATATACGAAAGTAGCTTTAATAAGGCCCACCTGACCCCACGAAAGCTGAGGAA	0	270	0	608	0	0	0	0	0	519	547	572	0	0	775	599	0	210	549	218	0	0	0	486	504	1075	10	386	1	0	189	259	0	57	206	628	159	68	0	0
OTU_45	Chordata	Actinopteri	Salmoniformes	Salmonidae	Salmo	Salmo salar	100	Midori2	GCGGTTATACGAGAGGCCCTAGTTGATAACTACCGGCGTAAAGAGTGGTTACGGAAAAATATTTAATAAAGCCGAACACCCCCTCAGCCGTCATACGCACCTGGGGGCACGAAGATCTACTACGAAAGCAGCTTTAATTATACCTGAACCCACGACAGCTACGACA	0	0	0	0	0	0	0	0	0	1	0	0	0	0	0	0	0	0	0	0	0	0	16932	16128	0	0	0	0	0	0	0	0	0	1	0	0	0	0	0	0
OTU_46	Chordata	Actinopteri	Cypriniformes	Xenocyprididae	Ctenopharyngodon	Ctenopharyngodon idella	100	Midori2	GCGGTTAAACGAGAGGCCCCAGTTGATAACACCACGGCGTAAAGGGTGGTTAAGGAAAGCAAAACAATAAAGCCAAATGGCCCTTTGGCCGTCATACGCTTCTAGGTGTCCGAAGCCCGATCATACGAAAGTAGCTTTAACAAAGCCCACCTGACCCCACGAAAGCTGAGAAA	0	0	10867	0	0	0	1	7283	0	0	0	0	2173	0	0	0	0	0	0	0	0	0	0	0	0	0	0	0	0	0	0	0	1	0	0	0	0	0	0	0
OTU_47	Chordata	Actinopteri	Perciformes	Cottidae	Cottus	Cottus rhenanus	100	Midori2	GCGGTTATACGAGAGGCCCAAGTTGACAAACACCGGCGTAAAGCGTGGTTAAGTTAAAAATCATACTAAAGCCAAACATCTTCAAGACTGTTATACGTAACCGAAGATAGGAAGTTCAACCACGAAAGTCGCTTTATCTGATCTGAATCCACGAAAGCTAAGGAA	0	0	0	7690	0	14548	0	4822	0	0	0	0	0	0	98	0	0	0	0	0	0	0	0	0	0	0	0	0	0	0	0	0	0	0	1067	0	0	0	0	0
OTU_48	Chordata	Actinopteri	Cypriniformes	Leuciscidae	Leuciscus	Leuciscus aspius	100	Midori2	GCGGTTAAACGAGAGGCCCTAGTTAATAATACACGGCGTAAAGGGTGGTTAAGGAAAGCATAACAATAAAGTCGAATGGCCCCTTGGCTGTCATACGCTTCTAGGTGTCCGAAGCCCAATATACGAAAGTAGCTTTAATAAGGCCCACCTGACCCCACGAAAGCTACGATA	3	7758	3	17032	1	0	0	14	1	12934	15468	15619	5	2	24497	18269	3	5317	17303	6645	0	2	0	11286	17177	26150	248	11933	0	3	5939	5423	2	1980	5065	20184	5914	1901	0	0
OTU_49	Chordata	Actinopteri	Perciformes	Percidae	Gymnocephalus	Gymnocephalus cernua	100	Midori2	GCGGTTATACGAGAGGCCCAAGCTGATAGATATCGGCGTAAAGCGTGGTTAAGATTTTAATATAAACTAAAGCCGAACACCTTCAAAGCTGTTATACGCACCCGAAGGTAAGAAGTTCAACCACGAAAGTGGCTTTATAACCCCTGAACCCACGAAAGCTACGACA	0	0	11098	0	0	0	0	0	0	0	0	0	4294	0	0	0	0	8481	0	0	0	0	0	0	0	0	0	0	0	0	0	0	0	0	5973	0	0	0	0	0
OTU_50	Chordata	Actinopteri	Perciformes	Percidae	Perca	Perca fluviatilis	97.561	Midori2	GCGGTTATACGAGAGGCCCAAGTTGATAGACATCGGCGTAAAGCGTGGTTAAGATTAAAGACAATACTAAAGCCGAACACCTTCAGAGCTGTTATACGCACCCGAAGGTAAGAAGTTCAACCACGAAAGTGGCTTTATTACCCCTGAACCCACGAAAGCTAGGAAA	572	1628	227	499	114	102	381	386	401	248	387	549	226	120	188	633	803	875	790	294	90	6	110	60	301	175	791	484	173	433	407	365	1261	169	413	458	240	165	0	0
OTU_51	Chordata	Actinopteri	Cypriniformes	Leuciscidae			97.093	Midori2	GCGGTTAAACGAGAGGCCCTAGTTAATGATACACGGCGTAAAGGGTGGTTAAGGAAAACATAATAATAAAGCCAAATGGCCCTTTGGCTGTCATACGCTTCTAGGTGTCCGAAGCCCAATTATACGAAAGTAGCTTTAATAAAGTCCACCTGACCCCACGAAAGCTGAGAAA	25	15	5696	112	8	47	10	4746	7	22	25	17	39	25	2	6	22	24	2288	11	14	0	13	29	4	14	8	21	20	14	9	11	9	19	13	9	31	11	0	0
OTU_52	Chordata	Mammalia	Lagomorpha	Leporidae	Oryctolagus	Oryctolagus cuniculus	100	Midori2	GCGGTCATACGATTAACCCAAATTAATAAATATCCGGCGTAAAGCGTGATTAGAATAAACAACAAAATAAAATCAAATAACAACTAAGCTGTAAAAAGTAATAGTTGCAAACAAAAATAAACAACGAAAGTGATTTTATACTCTTCGAACTCACGATAGCTAAGGCC	0	0	0	24498	0	0	0	0	1	0	0	0	0	0	0	0	0	0	0	0	0	0	0	0	0	0	0	0	0	0	1	0	0	0	0	0	0	2019	0	0
OTU_53	Chordata	Actinopteri	Gobiiformes	Gobiidae	Neogobius		96.988	Midori2	GCGGTTATACGAGAGGCCCAAGTTGACAAAAATCGGCGAAAAGCGTGGTTAGTGATATCACCTCCACTAAAGCCAAACACCTTCAAGGCTGTAATACGCCCCCGAAGACAGGAAGCCCAATCACGAAAGTAGCTTTTCATGAAGCCACGAAAGCTAGGAAA	0	0	1	0	3	1	2	0	1	2	0	1	1	3	0	3	1	3	0	2	1	0	0	1	3	0	0	0	1	0	2	1	0	2	2	1	0	1	0	4
OTU_54	Chordata	Actinopteri	Cypriniformes	Leuciscidae	Leuciscus	Leuciscus leuciscus	97.576	Midori2	GCGGTTAAACGAGAGGCCCTAGTTAATAATACACGGCGTAAAGGGTGGTTAAGGAGAGCATAACAATAAAGCCGAATGGCCCTTTGGCTGTCATACGCTTCTAGGTGTCCGAAGTTCAACATACGAAAGTAGCTTTAATAACGCCCACCTGACCCCACGAAAGCTACGATA	270	169	593	813	681	190	502	283	506	297	440	635	2028	936	3531	3790	1258	1144	1913	1680	496	946	282	348	47	554	1047	1434	201	35	1479	822	2118	1487	65	563	364	372	0	0
OTU_55	Chordata	Actinopteri	Perciformes	Percidae	Sander	Sander lucioperca	97.546	manual check	GCGGTTATACGAGAGGCCCAAGTTGATAGACATCGGCGTAAAGCGTGGTTAAGACAAAAACAAAACTAAAGCCGAACACCTTCAGAGCTGTTATACGCATCCGAAGGTAAGAAGTTCAACCACGAAAGTGGCTTTATAGCCCCTGAACCCACGAAAGCTAGGAAA	713	1462	222	500	100	91	379	330	409	235	379	448	234	108	177	617	860	841	790	263	73	1	91	55	376	225	758	529	156	392	397	352	1115	176	433	417	192	162	0	0
OTU_56	Chordata	Actinopteri	Cypriniformes	Leuciscidae	Squalius	Squalius cephalus	97.093	Midori2	GCGGTTAAACGAGAGGCCCTAGTTAATAATACACGGCGTAAAGGGTGGTTAAGGAAAACATAACAATTAAAGCCGAATGGCCCTTTGGCTGTCATACGCTTCTTGTCCGAAGCCCAATATACGAAAGTAGCTTTAATAAAGTCCACCTGACCCCACGAAAGCTGAGAAA	18029	254	93	90	111	360	134	111	106	290	245	10361	92	212	64	183	187	319	115	100	148	0	859	1754	50	97	106	7467	3590	152	161	621	359	189	8843	99	164	80	0	0
OTU_57	Chordata	Actinopteri	Cypriniformes	Leuciscidae	Squalius	Squalius cephalus	97.093	Midori2	GCGGTTAGACGAGAGGCCCTAGTTGATATTACAACGGCGTAAAGGGTGGTTAAGGAAAACATAACAATAAAGCCGAATGGCCCTTTGGCTGTCATACGCTTCTAGGTGTCCGAAGCCCAATATACGAAAGTAGCTTTAATAAAGTCCACCTGACCCCACGAAAGCTGAGAAA	143	276	252	165	152	314	197	215	130	310	298	455	397	560	176	294	340	318	189	273	59	8	120	179	63	131	177	232	201	156	245	206	332	261	213	137	212	110	0	0
OTU_58	Chordata	Mammalia	Primates	Hominidae			94.578	Midori2	GCGGTCACACGATTAACCCAAGTCAATAGAAACCGGCATAAAGAGTGTTTTAGATCAATTCCCCTCAATAAAGCTAAAATTCACGTGAGTTGTAAAAAACTCCAGTTGATACAAAATAAACTACGAAAGTGGCTTTAATGCATCTGAACACAGAATAACTAAGACC	0	14848	0	0	0	0	0	0	0	0	0	0	0	0	0	0	0	0	0	5700	0	1	0	0	0	0	0	0	0	0	0	0	0	0	0	0	3123	0	0	0
OTU_59	Chordata	Actinopteri	Cypriniformes	Leuciscidae	Vimba	Vimba melanops	100	Midori2	GCGGTTAAACGAGAGGCCCCAGTTAATAATACACGGCGTAAAGGGTGGTTAAGGAAAGTATAACAATAAAGCCGAATGGCCCTTTGGCTGTCATACGCTTCTAGGTGTCCGAAGTCCAATATACGAAAGTAGCTTTAGTAGAGCCCACCTGACCCCACGAAAGCTGAGGAA	1	4	36	7	84	15	54	0	0	3	3	4	18	46	4	8	7	5	7	1	15	1	4	2	2	53	5	5	0	2	3	7	45	7	3	10	6	27	0	0
OTU_60	Chordata	Actinopteri	Cypriniformes	Leuciscidae	Leuciscus	Leuciscus leuciscus	98.802	Midori2	GCGGTTAAACGAGAGGCCCTAGTTAACAATACACGGCGTAAAGGGTGGTTAAGGAAAGCACAATAATAAAGCCAAATGGCCCTTTGGCTGTCATACGCTTCTAGGTGTCCGAAGCCCAATATACGAAAGTAGCTTTAATAAAGCCCACCTGACCCCACGAAAGCAGAAA	378	615	7261	321	612	4	12	148	368	289	1212	47	322	948	92	489	19	581	82	57	31	5	5	0	562	6	127	3	3615	4753	410	2831	11040	839	24	122	313	5550	0	0
OTU_61	Chordata	Actinopteri	Cypriniformes				95.906	Midori2	GCGGTTAGACGAGAGGCCCTAGTTGATATTACAACGGCGTAAAGGGTGGTTAAGGATAAACAAAAATAAAGTCAAATGGCCCTTTGGCTGTCATACGCTTCTAGGTGTCCGAAGCCCAATATACGAAAGTAGCTTTAATAAAGCCCACCTGACCCCACGAAAGCTGAGAAA	413	878	728	722	581	718	755	757	689	1000	846	1730	1678	1680	1237	1211	1247	1285	1053	944	140	22	137	124	346	573	505	546	477	425	970	607	1299	1060	380	426	498	311	0	0
OTU_62	Chordata	Actinopteri	Cypriniformes	Leuciscidae	Leuciscus	Leuciscus aspius	98.256	Midori2	GCGGTTAAACGAGAGGCCCCAGTTAATAATACACGGCGTAAAGGGTGGTTAAGGAAAGTATTAACAATAAAGTCGAATGGCCCCTTGGCTGTCATACGCTTCTAGGTGTCCGAAGCCCAATATACGAAAGTAGCTTTAATAAGGCCCACCTGACCCCACGAAAGCTGAGGAA	1	266	606	856	88	717	203	153	23	564	909	837	184	3	1178	1132	387	446	1252	553	765	2	560	509	779	1071	454	782	0	307	522	401	296	109	538	1018	409	817	0	0
OTU_63	Chordata	Actinopteri	Cypriniformes	Leuciscidae			97.661	Midori2	GCGGTTAAACGAGAGGCCCTAGTTAATAATACACGGCGTAAAGGGTGGTTAAGGACCACAATAATAAAGCCAAATGGCCCTTTGGCTGTCATACGCTTCTAGGTGTCCGAAGCCCAATATACGAAAGTAGCTTTAACAAAGCCCACCTGACCCCACGAAAGCTGAGAAA	6603	564	469	293	599	57	94	149	363	314	7097	8570	328	620	131	220	148	560	168	110	175	189	45	50	372	100	63	74	206	52	354	171	8582	9816	85	248	5294	44	0	0
OTU_64	Chordata	Actinopteri	Cypriniformes	Leuciscidae	Rutilus	Rutilus rutilus	97.674	Midori2	GCGGTTAGACGAGAGGCCCTAGTTGATATTACAACGGCGTAAAGGGTGGTTAAGGGAAGCACAATAATAAAGCCAAATGGCCCTTTGGCTGTCATACGCTTCTAGGTGTCCGAAGCCCAATATACGAAAGTAGCTTTAATAAAGCCCACCTGACCCCACGAAAGCTGAGAAA	145	265	115	164	102	101	199	184	215	254	183	464	631	292	238	334	287	382	252	178	15	34	72	41	131	132	74	119	53	59	224	153	333	276	54	101	117	72	0	0
OTU_65	Chordata	Aves	Pelecaniformes	Ardeidae	Ardea	Ardea cinerea	100	Midori2	GCGGTCACACAAGAGACCCAAATTAACTGTAACACGGCGTAAAGAGTGGCAGCACGCTATCACACCAACTAAGATCGAAATGCAACTGAGCTGTCATAAGCCCAAGCTGCACCTAAGACCACCCTAAAAACAATCTTAGCATCTGCGATTGATAAAACCCACGAAAGCTAAGACC	237	0	0	0	0	0	0	0	0	0	0	0	74	0	0	0	4538	0	1321	0	0	0	0	0	3	0	0	21	0	0	0	1957	0	4719	0	914	0	3335	0	0
OTU_66	Chordata	Mammalia	Rodentia	Sciuridae	Sciurus	Sciurus vulgaris	100	Midori2	GCGGTCATACGATTAACCCTAGTTAATAAAGCACGGCGTAAAGCGTGATTAAGGTTCTATCCTAAATAAGATTAAGCTTTGACTAAGCTGTAAAAAGCCTTAGTTAACATAAAAATATAAAACGAAAGTAATCTTATATCTCCTGAACTCACGATAGCTAAGACC	3483	0	0	0	0	0	0	0	0	0	0	0	0	0	0	0	0	0	0	0	0	0	0	0	0	0	0	6707	2538	6169	0	0	0	0	0	0	0	0	0	0
OTU_67	Chordata	Actinopteri	Gobiiformes	Gobiidae	Proterorhinus	Proterorhinus semilunaris	100	Midori2	GCGGTTATACGAGAGGCCCAAGTTGACTAATATTCGGCGTAAAGAGTGGTTAATGACTTACTTACTAAAGCCAAACACCTTCAAGGCTGTTAAACGCCCCCGAGGGTAAGAGGAACCCCCACGAAAGTAGCTTTAATTATCATGAGCCCACGAAAGCTGGGAAA	15	0	174	0	108	227	98	75	37	141	0	119	243	0	728	1153	0	141	391	130	0	0	458	333	1393	612	0	29	569	701	1449	74	43	1	25	141	31	41	0	0
OTU_68	Chordata	Actinopteri	Cypriniformes	Leuciscidae	Squalius		96.491	Midori2	GCGGTTAAACGAGAGGCCCTAGTTAATAATACACGGCGTAAAGGGTGGTTAAGGAAAACATGATAATAAAGCCGAATGGCCCTTTAGCTGTCATACGCTTCTAGGTATCCGAAGCCCAATATACGAAAGTAGCTTTAACAAAGTCCACCTGACGCCACGAAAGCTGAGAAA	0	0	2	0	0	0	0	0	0	0	0	0	0	6014	0	0	0	6836	0	0	0	0	0	0	0	0	1	0	0	0	0	0	0	0	0	0	0	0	0	0
OTU_69	Chordata	Actinopteri	Salmoniformes	Salmonidae	Oncorhynchus	Oncorhynchus mykiss	100	Midori2	GCGGTTATACGAGAGACCCTAGTTGATAACTACCGGCGTAAAGAGTGGTTATGGAAAAATATTTAATAAAGCCGAACACCCCCTCAGCCGTCATACGCACCTGGGAGCACGAAGACCTACTGCGAAAGCAGCTTTAACTATGCCTGACCCCACGACAGCTAAGAAA	0	0	0	0	0	0	0	0	0	0	0	0	0	0	0	4528	0	0	0	0	0	0	0	0	0	0	0	0	0	0	0	0	0	10929	0	0	0	0	0	0
OTU_70	Chordata	Mammalia					82.822	Midori2	GCAGCCATACAGTTAACACGAGCTAATAAAACTCAGTGTAAAGAGTGTTTAAGGTCTACCCTCAATAAAGCTAAGTTCCATCTAAGTTGTAAAAAACTCCAGCTGAAGTAAAATGTACTACGAAAGTGGCTTTAATATCCTGAAGACACAATAGCTAAGACC	0	0	0	0	0	0	0	543	0	0	1755	0	0	0	0	0	0	0	0	2665	0	0	11485	0	0	0	0	0	0	0	0	0	0	0	0	0	0	0	0	0
OTU_71	Chordata	Mammalia	Rodentia	Muridae	Apodemus	Apodemus flavicollis	99.401	Midori2	GCGGTCATACGATTAACCCAAACTAATTACTTCTCGGCGTAAAACGTGCTAACTAGAAATTACAAATAGAACTAAAATCCAACCAATATGTGAAAATTCATTGTTCGGCCCTAAAATCAATAACGAAAGTAGTTCTAATAATTTTACTCTGCACGACAGCTAAGATC	0	0	0	0	0	0	0	0	0	0	0	0	0	0	0	1	0	0	0	0	0	0	0	0	0	0	0	0	0	0	3170	0	0	0	0	0	0	0	0	0
OTU_72	Chordata	Amphibia	Caudata	Salamandridae	Lissotriton	Lissotriton vulgaris	100	Midori2	GCGGTTATACGAGAGACTCAAATTAATTACATCGGCTCAAAGGGTGGTTAAACAAGCACATTAAATAAGGCTAAAAACTAACTCTGCCGTCGCACGCAAAAGTTAAAAAAAGTACAACATCGAAAGTCGCCTTACCTAAACAAACTTGAACCCACGACAGCTAGGGCA	0	0	0	0	0	0	0	0	0	0	0	0	0	0	0	0	0	0	0	0	0	0	0	0	0	0	0	0	0	0	0	0	0	14120	0	0	0	0	0	0
OTU_73	Chordata	Actinopteri	Cypriniformes	Leuciscidae			98.83	Midori2	GCGGTTAAACGAGAGGCCCTAGTTAATAATACACGGCGTAAAGGGTGTTAAGGAAGCACAATAATAAAGCCAAATGGCCCTTTGGCTGTCATACGCTTCTAGGTGTCCGAAGCCCAATATACGAAAGTAGCTTTAATAAAGCCCACCTGACCCCACGAAAGCTGAGAAA	10739	16378	17575	9169	13903	1338	697	5710	9886	7621	22201	1436	8086	20769	2609	5872	906	17109	3642	2168	369	1081	302	337	12118	911	410	465	7176	574	11913	5086	19545	17569	381	3137	10673	555	0	0
OTU_74	Chordata	Aves	Passeriformes	Corvidae	Corvus	Corvus corone	100	manual check	GCGGTCATACAGGAGACTCAAATTAACAGTATAACGGCGTAAAGGGTGGTAACATGCTATCTAAGTAACTAAGATTAAAAAGCAACTGAGCTGTAATAAGCCCAAGATGCTCATAAGGCCAACTACCAAAGAAGATCTTAGGCTGACGATTAATTGAAATCCACGAAAGCCAGGGCC	0	0	0	0	0	0	0	1218	0	0	0	0	0	0	0	0	0	0	0	0	0	0	0	0	0	0	0	4192	0	0	0	0	0	0	0	0	0	0	0	0
OTU_75	Chordata	Mammalia					79.747	Midori2	GCAGCCATACGATTAACCCAAGCTAATTGAACTTGGTGAAAACAGTGCTTAAGGTCTGCCCTCAATAAAGCTAAACTCCGTCTAAGTTGTAAAAAACTCCAGCTGAAATAAAATATACTATGAATGTGCCTTTAATATCCTGAAGATGCAACAGCTAAGACC	140	0	0	0	0	0	0	0	0	0	0	0	0	0	0	1082	0	0	1335	0	0	0	0	5910	0	3960	0	0	28	0	0	0	0	0	0	0	0	0	0	0
OTU_76	Chordata	Aves	Galliformes	Phasianidae	Gallus	Gallus gallus	100	manual check	GCGGTCATACAAGAAACCCAAATCAATAGCTACCCGGCGTAAAGAGTGGCCACATGTTATCTGCACCAGCTAAGATTAAAATGCAACCAAGCTGTCATAAGCCTAAGATCCACCTAAACCCAACCCAAATCCATCTTAGCCTCAACGATTAATTTTAACCCACGAAAGCTAGGACC	0	0	0	0	0	0	0	0	0	0	0	0	0	0	0	1851	0	0	1002	0	0	0	0	1988	0	0	3398	1117	0	3263	0	0	0	0	0	0	0	0	0	0
OTU_77	Chordata	Mammalia	Lagomorpha	Leporidae	Lepus	Lepus europaeus	100	Midori2	GCGGTCATACGATTAACCCAAACTAATAAACACCCGGCGTAAAGCGTGATTAGAATATTAAACAAGAATAAAATCAAATAGCAACTAAGCTGTAAAAAGTAACAGTTGCAAACAAAAATAAACAACGAAAGTGATTTTATAACCTTCGAACTCACGATAGCTAAGATC	0	0	0	0	0	0	0	0	0	0	0	0	0	0	0	0	0	0	0	0	0	0	0	0	0	8668	0	0	1	0	0	0	0	0	0	0	0	0	0	0
OTU_78	Chordata	Actinopteri	Cypriniformes	Leuciscidae	Abramis		96.512	Midori2	GCGGTTAAACGAGAGGCCCCAGTTAATAATACACGGCGTAAAGGTGGTTAAAAGTATTAACAATAAAGCCGAATGGCCCTTCGCTGTCATACGCTTCTAGGTGTCCGAAGTTCAACATACGAAAGTAGCTTTAATAACGCCCACCTGACCCCACGAAAGCTGAGAAA	0	0	0	0	1	0	0	0	0	0	1	0	0	0	0	0	0	0	0	0	0	0	0	0	0	0	0	0	0	0	0	0	0	0	0	0	0	0	0	0
OTU_79	Chordata	Amphibia	Caudata	Salamandridae			91.515	Midori2	GCGGTTATACGAGAGACTCAAATTAATTTAATCGGCCCAAAGGGTGGTTAGACAGGCACACTAAATAAGGCTAAAAACTAACTCCGCTGTCGCACGCAGAAGTTaaaaaaaaTTCAATATCGAAAGTCGCCTTATCTAAAGCTTGAACCCACGACAGCTAGGAAA	0	0	0	0	0	0	0	0	0	0	0	0	0	0	0	0	0	0	0	0	0	0	0	0	0	0	0	0	0	0	0	0	0	0	0	0	0	0	0	0
OTU_80	Chordata	Mammalia	Primates				86.25	Midori2	ACGGTCATACGATGAACCCAAGCTAATAGAGACTGGCGTAAAGAATGTTTTACATTATCCCTCAATAAAGCTAAATTTCACCTAAGTTGTAGAAAACCCTAGTTGATATAAAACAAACTACGAAAGTGGCTTTAATATTTCTGAATACACAATAGCGAAGATT	0	0	0	0	0	0	0	0	0	0	0	0	0	0	0	0	0	0	2602	3435	0	0	2730	0	0	0	0	2098	0	0	0	0	0	0	0	0	0	0	0	0
OTU_81	Chordata	Actinopteri	Cypriniformes	Leuciscidae			96.512	Midori2	GCGGTTAAACGAGAGGCCCCAGTTAATAATACACGGCGTAAAGGGTGGTTAAGGAAAGTATTAACAATAAAGCCGAATGGCCCTTTGGCTGTCATACGCTTCTAGGTGTCCGAAGCCCAATATACGAAAGTAGCTAATAAAGTCCACCTGACCCCACGAAAGCTGAGAAA	1436	1554	989	940	933	3179	956	1213	840	2549	2039	2255	1148	2501	758	1319	1874	2174	1532	1364	734	16	825	1610	644	1024	2997	2295	1778	1038	2489	1393	3451	2109	1703	1389	1564	1450	0	0
OTU_82	Chordata	Actinopteri	Cypriniformes	Leuciscidae	Rutilus	Rutilus rutilus	98.83	Midori2	GCGGTAAACGAGAGGCCCTAGTTAATAATACACGGCGTAAAGGGTGGTTAAGGGAAGCACAATAATAAAGCCAAATGGCCCTTTGGCTGTCATACGCTTCTAGGTGTCCGAAGCCCAATATACGAAAGTAGCTTTAATAACGCCCACCTGACCCCACGAAAGCTGAGAAA	3241	5447	1352	1974	1115	2082	2128	2841	3502	4381	2591	4148	10042	2887	2517	5615	4029	4502	3239	3143	370	2927	1308	1200	3174	3119	1114	2264	1170	1533	4225	1664	4271	3981	1123	1708	2736	2072	0	0
OTU_83	Chordata	Actinopteri	Cypriniformes	Leuciscidae	Squalius		96.491	Midori2	GCGGTTAAACGAGAGGCCCTAGTTAATAATACACGGCGTAAAGGGTGGTTAAGGAAAACATAACAATAAAGCCGAATGGCCCTTTGGCTGTCATACGCTTCTAGGTGTCCCCCAATATACGAAAGTAACTTTAATAAAGTCCACCTGACCCCACGAAAGCTGAGAAA	52	57	24	22	32	63	17	27	11	32	64	54	27	58	17	23	37	37	20	36	20	0	12	32	12	8	24	33	39	36	31	18	28	36	46	24	41	109	0	0
OTU_84	Chordata	Mammalia					79.167	Midori2	ACAGCCATATGATTAACACAAGCTAATAGAACTCGGCATAAAGAATGTTTAAGGTCTATCCTCAATAAAGCTAAGTTGTAAAAAACTCCATCTAAGTTGTAAAAAACTCCAGCTGAAATCAAATGTACTACAAAGTGGCTTTAATACCCTGAAGACACAATAGCTAAGACC	0	0	0	0	0	0	0	0	0	0	0	0	0	0	0	0	0	0	2549	0	0	0	538	0	853	0	0	0	0	0	4643	0	0	0	0	0	0	0	0	0
OTU_85	Chordata	Actinopteri	Cypriniformes	Leuciscidae	Leuciscus		95.322	Midori2	GCGGTTAAACGAGAGGCCCTAGTTAATAATACACGGCGTAAAGGGTGGTTAAGGAAAACATAACAATAAAGCCGAATGGCCCCTTGGCCGTCATACGCTTCTAGGAGTCCGAAGCCCTAATACGAAAGTAACTTTAATAAACCCACCTGACCCCACGAAAGCTGAGAAA	121	353	202	260	142	256	227	212	164	322	261	823	431	661	367	274	379	414	352	235	26	0	25	42	106	155	171	157	219	114	258	179	503	307	137	143	162	62	0	0
OTU_86	Chordata	Mammalia	Artiodactyla	Cervidae	Cervus	Cervus elaphus	100	Midori2	GCGGTCATACGATTAACCCAAGTTAATAGGCATACGGCGTAAAGTGTGTTAAAGCACTATACTAAATAAAGTTAAATTCCAATTAAGCTGTAAAAAGCCATAATTGTAACAAAAATATATAACGAAAGTAACTTTACAACCGCTGAAACACGATAGCTAGGACC	0	1	0	0	0	0	0	0	0	0	0	0	0	0	0	0	0	0	0	0	0	0	0	0	0	0	0	0	7567	0	0	0	0	0	0	0	0	0	0	0
OTU_87	Chordata	Mammalia	Rodentia	Castoridae			93.252	Midori2	GCCATCATACGATAGACCCAAACTAATAAACCCCGGCGTAAAGCATGTTTAAGAATCCCTACCTTCAATAAGAATAAACTTTACCTAGGCCATAAAAAGCTATAGCTAAAGAAAAAATAACTTACGAAAGTAATCTTAACAAATCTGATAACACTACAGCTAAGACC	0	0	0	0	0	0	0	0	0	0	0	0	0	0	0	0	0	0	0	0	0	0	0	0	0	0	0	0	0	0	0	7570	0	0	0	0	0	0	0	0
OTU_88	Chordata	Mammalia					80.892	Midori2	ATGATCATACGATTAACCCAAACTAATAAAATCTGGTGAAAAGCGTGTTTAAGGTAAACCTACAGTAAAGCTAAACTCCGTCTAAGCTGTAAAAAGCTTCAACTGAAGTAAAAATAAACTACAAAAGTGACTTTAACACCCTGAAAACACGATAGCTAAGACT	0	0	0	0	0	0	0	0	0	0	0	0	0	0	0	0	0	0	3236	1522	0	0	0	0	2870	0	0	0	0	0	0	240	0	0	0	0	0	0	0	0
OTU_89	Chordata	Mammalia	Rodentia	Myocastoridae			90.909	Midori2	TCGGTCATACGATTAACCCTAATTAATGAATCCTCGGCGTAAAGAGTATTAAAGATATAACAAAAATTAAGATTAAATTTCATCTAGGTCataaaaaacaatagataaaaataaaaaCAATAACGAAAGTAATCTTAACATATCTGAATATACTAAAGCTGAGACA	0	0	7417	0	0	0	0	0	0	0	0	0	0	0	0	0	0	0	0	0	0	0	0	0	0	0	0	0	0	0	0	0	0	0	0	0	0	0	0	0
OTU_90	Chordata	Mammalia	Eulipotyphla	Erinaceidae	Erinaceus	Erinaceus europaeus	100	Midori2	GCGGTCATACGATTAACCCATGAGAATAGGAAATCGGCGTAAAGAGTGTTTAGGATATTAATGTAATGAAATTAAAAAATGACTTAGCTGTAAAAAGCTCATTTCATAAATAAAAACATCTACAAAAGTGATTTCATAGGATCTTATTACACGTGAGCTAAGACC	175	0	0	91	0	0	0	0	0	104	0	0	0	24	0	0	0	123	5	0	0	0	1	0	0	0	20	181	0	422	0	163	0	0	24	0	29	167	0	0
OTU_91	Chordata	Actinopteri	Cypriniformes	Leuciscidae	Abramis		96.512	Midori2	GCGGTTAAACGAGAGGCCCCAGTTAATAATACACGGCGTAAAGGGTGGTTAAGGAAAGTATTAACAATAAAGCCGAATGGCCCTTTGGCTGTCATACGCTTCTAGGTGTCCGAAGTTCAACATACGAAAGTAGCTTTAATAACACCCACCCCACGAAAGCTGAGAAA	4	7	4	6	8	14	8	10	6	8	10	239	6	5	272	138	200	1	11	28	4	80	1	8	8	9	13	12	151	5	22	11	10	12	5	5	5	15	0	4
OTU_92	Chordata	Actinopteri	Cypriniformes	Cyprinidae	Carassius	Carassius auratus/gibelio	100	manual check	GCGGTTAGACGAGAGGCCCTAGTTGATATTACAACGGCGTAAAGGGTGGTTAAGGATAAATAAAAATAAAGTCAAATGGCCCCTTGGCCGTCATACGCTTCTAGGCGTCCGAAGCCCTAATACGAAAGTAACTTTAATGAACCCACCTGACCCCACGAAAGCTACGATA	0	6419	0	0	1	10759	0	0	3798	0	0	0	1571	5638	0	1	0	957	2	0	0	0	0	12825	9183	26	0	0	0	0	0	1107	0	0	5089	0	0	0	0	0
OTU_93	Chordata	Mammalia	Artiodactyla	Bovidae	Capra	Capra hircus	100	Midori2	GCGGTCATACGATTAACCCAAGCTAACAGGAATACGGCGTAAAACGTGTTAAAGCACTACATCAAATAGAGTTAAATTCTAATTAAACTGTAAAAAGCCATAATTACAACAAAAATAGATGACGAAAGTAACCCTACTGCAGCTGATACACTATAGCTAAGACC	0	0	0	0	0	0	0	0	0	0	0	0	0	0	0	0	0	0	0	0	0	0	6690	0	0	0	0	0	1	0	0	0	0	0	0	0	0	0	0	0
OTU_94	Chordata	Mammalia					82.911	Midori2	ACAGCCATATGATTAACGCAAGCTAATAGAACTCGGCCTAAAGCGTGTTTAAGGTCTGCCCTCAATAAACCTAAACTCCATCTAAGTTGTAAAAAAACTTTAGCTGAAATAAAATATACTACGAAAGTGGCTTTAGTATCTTGAAGACACAATAGCTAAGACT	0	0	0	0	0	0	0	0	0	1346	1890	0	0	0	0	0	0	0	612	0	0	0	0	2762	0	0	0	0	0	0	0	0	0	0	0	554	0	0	0	0
OTU_95	Chordata	Mammalia	Chiroptera	Vespertilionidae	Pipistrellus		96.429	Midori2	GCGGTCATACGATTAGGCCAAACTAATAGACAATCGGCGTAAAGTGTGTTTTAGAAAATTACTCCATTAATAAAGTCAAGCCTTAACTAGGCTGTAAAAAGCCTTAGTTATTGTAAGATACCCAACGAAAGTGACTTTAAAATTTCTGACTACACGACAGCTAAGACC	0	0	0	0	0	0	0	0	0	0	0	0	0	0	0	0	0	0	0	0	0	0	0	0	0	0	0	0	0	0	0	0	0	0	0	0	1	0	0	0
OTU_96	Chordata	Mammalia	Rodentia	Cricetidae	Myodes	Myodes glareolus	99.39	Midori2	GCGGTCATACGATTAACCCAAACTAATTATTCTCGGCGTAAAACGTGTTACTGGGACCACAAAAAATAGAATTGAAATCCATCCAATATGTGAAAATTCATCGTTGGACTTAAAATCAGTAACGAAAGTAATTCTAATCCACCTGAGACACGATAGCTAAGACC	0	0	0	0	0	0	0	0	0	0	4328	0	0	0	0	0	0	0	1	0	0	0	0	0	0	0	0	0	0	0	0	0	0	0	0	0	0	0	0	0
OTU_97	Chordata	Actinopteri	Gobiiformes	Gobiidae	Neogobius		96.988	Midori2	GCGGTGATACGAGAGGCCCAAGTTGACAAAACTCGGCGAAAAGCGTGGTTAGTGATATCACCTCCACTAAAGCCAAACACCTTCAAGGCTGTAATACGCCCCCGAAGACAGGAAGCCCAATCACGAAAGTAGCTTTAATTTTCCTGAAGCCACGAAATCTGGGAAA	825	939	256	275	1037	437	312	769	247	255	1035	307	733	209	259	316	237	948	246	183	205	206	236	236	246	200	361	243	207	350	304	223	364	253	815	816	855	348	0	108
OTU_98	Chordata	Mammalia	Carnivora	Felidae	Felis	Felis catus	99.401	Midori2	GCGGTCATACGATTAGCCCAAACTAATAGACCCACGGCGTAAAGCGTGTTACAGAGAAAAAAATATACTAAAGTTAAATTTTAACTAGGCCGTAGAAAGCTAGAGTTTACATAAAAATACAGCACGAAAGTAACTTTAACACCTCCGACTACACGACAGCTAAGACC	0	0	0	0	0	0	0	0	0	0	0	0	0	0	0	0	0	0	0	0	0	0	0	0	0	0	0	0	0	3158	0	0	0	0	102	3068	0	0	0	0
OTU_99	Chordata	Actinopteri	Cypriniformes	Leuciscidae	Abramis		96.512	Midori2	GCGGTTAAACGAGAGGCCCTAGTTAATAATACACGGCGTAAAGGGTGGTTAAGGAAAGCAGCAATAAAGCCGAATGGCCCTTTGGCTGTCATACGCTTCTAGGTGTCCGAAGTTCAACATACGAAAGTAGCTTTAATAACGCCCACCTGACCCCACGAAAGCTGAGAAA	1371	2509	2430	2518	1306	2212	1448	2078	1713	3382	3016	3230	2408	3154	1390	2604	1990	3254	2951	3594	1872	1620	1796	855	1298	2247	4311	1857	1400	1130	3359	2979	13731	3602	2335	947	1583	2667	0	1
OTU_100	Chordata	Actinopteri	Cypriniformes	Leuciscidae	Leuciscus		96.512	Midori2	GCGGTTATACGAGAGGCCCAAGTTGATAGACATCGGCGTAAAGGGTGGTTAAGGAGAGCATAACAATAAAGCCGAATGGCCCTTTGGCTGTCATACGCTTCTAGGTGTCCGAAGCCCAATATACGAAAGTAGCTTTAATAAAGCCCACCTGACCCCACGAAAGCTGAGAAA	138	220	99	90	50	27	80	87	101	56	89	86	194	248	161	298	194	150	104	105	9	84	60	22	62	79	79	64	67	64	80	106	180	187	98	86	85	38	0	0
OTU_101	Chordata	Actinopteri	Cypriniformes	Leuciscidae	Chondrostoma	Chondrostoma nasus	99.394	Midori2	GCGGTTAAACGAGAGGCCCTAGTTAATAATACACGGCGTAGAGGGTGGTTAAGGAAAGCATAACAATAAAGCCGAATGGCCCTTTGGCTGTCATACGCTTCTAGGTGTCCGAAGCCCATTATACGAAAGTAGCTTTAACAAAGCCCACCTGACCCCACGAAAGCTACGATA	1	14474	8544	8942	0	0	0	0	0	1	0	9282	0	1	0	0	1	10	1	2	0	389	0	0	0	3	12146	0	13053	0	6426	4	57	0	2	3059	0	0	0	0
OTU_102	Chordata	Mammalia	Primates				86.164	Midori2	GCAGCCATACGATTAACCCAAGCTAATAGAACCCAGCTTAAAGAGTGTTTTAGATCTGTTCTCAATAAAGCTAAGCTTCATCTAAGTTGTAAAAAACCCTAGCTGAAATAAAATAAACTACGAAGGTGAATTTAATATTTCTGAGGACACAATAGCTAAGACC	0	0	0	0	0	0	0	0	0	0	647	0	0	0	0	0	0	0	3515	0	0	0	0	0	0	1222	0	0	0	0	284	0	0	0	0	0	0	0	0	0
OTU_103	Chordata	Actinopteri	Perciformes	Percidae	Perca	Perca fluviatilis	98.75	Midori2	GCGGTTATACGAGAGGCCCAAGTTGATAGACATCGGCGTAAAGCGTGGTTAAGATTAAAGACAATACTAAAGCCGAACACCTTCAGAGCTGTTATACGCATCCGAAGGTAAGAAGTTCAACCACGAAAGTGGCTTTATAGCACCTGACCCCACGAAAGCTGAGAAA	347	496	193	221	160	205	222	273	213	223	250	339	376	405	345	375	427	285	400	253	55	190	204	173	250	285	373	296	235	209	325	235	445	464	249	254	203	217	0	0
OTU_104	Chordata	Actinopteri	Gobiiformes	Gobiidae	Neogobius		96.933	Midori2	GCGGTTATACGAGAGGCCCAAGTTGACAAAGATCGGCGTAAAGCGTGGTTAATGATAATTCCACTAAAGCCAAACACCTTCAAGGCTGTTATACGCCCCCGAAGACAGGAAGCCCAATCACGAAAGTAGCTTTAATTTTCATGAAGCCACGAAAGCTAGGAAA	157	560	0	0	0	0	0	308	156	0	0	0	0	290	0	0	116	189	0	0	0	0	0	0	397	0	0	393	0	1	414	0	0	544	499	0	0	535	0	0
OTU_105	Chordata	Actinopteri	Cypriniformes	Leuciscidae	Leuciscus	Leuciscus leuciscus	98.246	Midori2	GCGGTTAAACGAGGGGCCCTAGTTAATAATACACGGCGTAAAGGGTGGTTAAGGAAAGCACAATAATAAAGCCAAATGGCCCTTTGGCTGTCATACGCTTCTAGGTGTCCGAAGCCCAATATACGAAAGTAGCTTTAATAAGGCCCACCTGACCCCACGAAAGCTGAGGAA	249	394	676	274	375	36	28	125	251	194	636	142	238	550	71	230	47	414	107	61	88	21	26	7	330	36	6128	9	265	7177	306	14674	589	724	3494	117	274	56	0	0
OTU_106	Chordata	Actinopteri	Cypriniformes	Leuciscidae	Alburnus	Alburnus alburnus	100	Midori2	GCGGTTAAACGAGGGGCCCTAGTTAATAATACGCGGCGTAAAGGGTGGTTAAGGAAAGCATAACAATAAAGCCGAATGGCCCTTTGGCTGTCATACGCTTCTAGGTGTCCGAAGCCCAATATACGAAAGTAGCTTTAATAAGGCCCACCTGACCCCACGAAAGCTACGGCA	2	8	39611	11500	6339	31512	13220	8331	642	1	17286	10529	10593	3	3	9572	21237	8559	1459	6208	57951	5	23759	2	0	4	165	4	1	24523	3337	3585	7275	2	17922	4937	13365	31007	0	0
OTU_107	Chordata	Actinopteri	Cypriniformes	Leuciscidae	Leuciscus		96.512	Midori2	GCGGTTAAACGAGAGGCCCCAGTTAATAATACACGGCGTAAAGGGTTAAGGAAAGTATTAACAATAAAGCCGAATGGCCCTTTGGCTGTCATACGCTTCTAGGTGTCCGAAGCCCAATATACGAAAGTAGCTTTAATAAAGCCCACCTGACCCCACGAAAGCTGAGAAA	2268	3110	2632	3149	1903	2098	1874	2688	3005	4761	3741	4193	4750	4561	4546	6645	3634	5205	5383	5792	1680	2373	2033	1308	2074	3217	5149	3627	1467	1306	5065	4206	10572	6057	2229	1698	2293	3134	0	0
OTU_108	Chordata	Actinopteri	Cypriniformes	Leuciscidae	Squalius	Squalius cephalus	97.076	Midori2	GCGGTTAAACGAGAGGCCCCAGTTAATAATACACGGCGTAAAGGGTGGTTAAGGAAAACATAACAATAAAGCCGAATGGCCCTTTGGCTGTCATACGCTTCTAGGTGTCCGAAGCCTAATATATGAAAGTAGTTTTAATAAAGTCCACCTGACCCCACGAAAGCTGAGAAA	43	43	152	22	28	125	48	67	33	96	68	59	26	89	23	28	50	62	46	41	23	0	20	50	28	31	82	46	48	37	62	43	95	76	41	57	64	37	0	0
OTU_109	Chordata	Actinopteri	Gobiiformes	Gobiidae	Neogobius		96.988	Midori2	GCGGTTATACGAGAGGCCCAAGTTGACAAAAATCGGCGAAAAGCGTGGTTAGTGATATCACCTCCACTAAAGCCAAACACCTTCAAGGCTGTAATACGCCCCCGAAGACAGGAAATCACGAAAGTAGCTTTAATTTTCATGAAGCCACGAAAGCTAGGAAA	0	0	0	0	1	0	0	0	1	0	0	0	1	0	0	0	0	0	0	0	0	0	0	0	0	0	0	0	0	0	0	0	0	0	0	0	0	0	0	0
OTU_110	Chordata	Aves	Passeriformes	Sylviidae	Sylvia	Sylvia borin	100	Midori2	GCGGTCAGACAGGAGACCCAAATCAACATTATAACGGCGTAAAGCGTGGTTCTATGTTATCCAAGTAGCTAAGATTAAAAGACATCTGAGTTGTTATAAGCCAAAGATGTCCATAAGGCCACTATTCAAAGAAAATCTTAGACCAACGATTAATTGAAACCCACGAAAGCCAGGGCC	0	0	0	0	0	0	0	0	0	0	0	0	0	0	0	0	0	0	3569	0	0	0	0	0	0	0	0	0	0	0	0	0	0	0	0	0	0	0	0	0
OTU_111	Chordata	Actinopteri	Gobiiformes	Gobiidae	Neogobius		96.988	Midori2	GCGGTTATACGAGAGGCCCAAGTTGACAAAAACCGCGAAAAGCGTGGTTGATATCACCTCCACTAAAGCCAAACACCTTCAAGGCTGTAATACGCCCCCGAAGACAGGAAGCCCAATCACGAAAGTAGCTTTAATTTTCATGAAGCCACGAAAGCTAGGAAA	3	8	1	0	1	0	1	1	2	0	0	6	0	1	5	1	0	4	1	0	5	1	0	3	4	1	2	4	3	0	0	1	1	1	0	0	1	0	0	0
OTU_112	Chordata	Actinopteri	Gobiiformes	Gobiidae	Neogobius		96.988	Midori2	GCGGTTATACGAGAGGCCCAAGTTGACAAAAATCGGCGAAAAGCGTGGTTAGTGATATCACCTCCACTAAAGCCAAACACCTTCAAGGCTGTTATACGCCCCCGAAGACAGGAAGACCCATCACGAAAGTAGCTTTAATCTTCATGAACCCACGAAAGCTAGGAAA	95	335	0	0	0	0	0	316	134	0	1	0	0	289	0	0	75	105	0	0	0	0	0	0	389	0	0	338	0	0	285	0	0	504	294	0	0	471	0	0
OTU_113	Chordata	Actinopteri	Cypriniformes	Cyprinidae	Capoeta		96.471	Midori2	GCGGTTAGACGAGAGGCCCTAGTTGATATTACAACGGCGTAAAGGGTGGTTAAGGATAAACAAAAATAAAGTCAAATGGCCCCTTGGCCGTCATACGCTTCTAGGAGTCCGAGGCCCTATATACGAAAGTAGCTTTAATTAACCCGCCTGACCCCACGAAAACTGAGAAA	39	74	273	227	78	74	402	257	116	62	182	215	348	233	307	246	158	167	178	188	0	0	78	117	110	90	108	217	133	89	257	141	90	147	95	61	63	68	0	0
OTU_114	Chordata	Actinopteri	Gobiiformes	Gobiidae	Neogobius	Neogobius melanostomus	98.78	Midori2	GCGGTATACGAGAGGCCCAAGTTGACAAAAATCGGCGAAAAGCGTGGTTAGTGATATCACCTCCACTAAAGCCAAACACCTTCAAGGCTGTAATACGCCCCCGAAGACAGGAAGCCCAATCACGAAAGTAGCTTTAATTTTCATGAAGCCACGAAAGCTACGATA	2241	2675	678	996	413	627	1090	781	937	656	807	1419	1139	1129	1155	1557	1655	1345	1480	661	153	491	927	536	988	854	1477	1113	637	849	967	947	1703	1136	1148	1225	687	749	0	23
OTU_115	Chordata	Actinopteri	Cypriniformes	Gobionidae	Gobio		95.376	Midori2	GCGGTTAAACGAGAGGCCCTAGTTGATTTTATCACGGCGTAAAGGGTGGTTAAGGAAGACAAAACAATAAAGCCGAATGGCCCTTTGGCTGTCATACGCTTCTAGGTGTCCGAAGTTCAACATACGAAAGTAGCTTTAATAACGCCCACCTGACCCCACGAAAGCTGAGAAA	193	124	166	94	145	0	62	0	171	147	468	0	120	0	0	217	197	472	193	134	0	0	0	0	0	0	0	0	32	245	428	0	0	217	0	73	0	0	0	0
OTU_116	Chordata	Actinopteri	Cypriniformes	Leuciscidae	Rutilus	Rutilus rutilus	97.661	Midori2	GCGGTTAAACGAGAGGCCCTAGTTAATAATACATGCGCAAAGGGTGGTTAAGGGAATCACAATAATAAAGCCAAATGGCCCTTTGGCTGTCATACGCTTCTAGGTGTCCGAAGCCCAATATACGAAAGTAGCTTTAATAAAGCCCACCTGACCCCACGAAAGCTGAGAAA	17	45	12	27	28	6	173	18	34	23	46	290	40	41	15	24	15	36	12	16	5	4	3	1	10	15	6	6	21	4	18	10	24	38	4	6	18	7	0	0
OTU_117	Chordata	Actinopteri	Perciformes	Percidae	Sander		96.364	Midori2	GCGGTTATACGAGAGGCCCAAGTTGACAAAAATCGGCGAAAAGCGTGGTTAAGACAAAAACAAAACTAAAGCCGAACACCTTCAGAGCTGTTATACGCACCCGAAGGTAAGAAGTTCAACCACGAAAGTGGCTTTATAGCCCCTGAACCCACGAAAGCTACGATA	17	35	21	12	9	9	11	7	22	9	17	24	20	5	12	18	27	29	37	14	6	2	4	7	10	9	29	26	6	9	17	19	43	4	15	11	5	8	0	0
OTU_118	Chordata	Actinopteri	Perciformes	Percidae	Perca	Perca fluviatilis	99.375	Midori2	GCGGTATACGAGAGGCCCAAGTTGATAGACATCGGCGTAAAGCGTGGTTAAGATTAAAGACAATACTAAAGCCGAACACCTTCAGAGCTGTTATACGCATCCGAAGGTAAGAAGTTCAACCACGAAAGTGGCTTTATAGCCCCTGAACCCACGAAAGCTGAGAAA	678	798	358	469	281	338	391	616	401	421	416	595	840	732	600	817	749	560	786	435	87	270	350	214	338	491	647	498	387	333	659	452	941	841	447	476	343	389	0	0
OTU_119	Chordata	Actinopteri	Cypriniformes	Leuciscidae	Leuciscus		97.59	Midori2	GCGGTTAAACGAGAGGCCCCAGTTAATAATACACGGCGTAAAGGGTGGTTAAGGAAAGTATTAACAATAAAGCCAAATGGCCCTTTGGCTGTCATACGCTTCTAGGTGTCCGAAGCCCAATATACGAAAGTAGCTTTAATAAAGCCCACCTGACCCCACGAAAGCTACGATA	307	501	142	193	110	337	151	230	306	545	282	670	412	257	274	341	305	646	568	357	80	97	122	100	298	270	392	263	106	135	405	236	1045	422	168	194	218	279	0	0
OTU_120	Chordata	Actinopteri	Gobiiformes	Gobiidae	Neogobius	Neogobius melanostomus	98.16	Midori2	GAGTTATACGAGAGGCCCAAGTTGACAAAAATCGGCGAAAAGCGTGGTTAGTGATATCACCTCCACTAAAGCCAAACACCTTCAAGGCTGTAATACGCCCCCGAAGACAGGAAGCCCAATCAAAAGTAGCTTTAATTTTCATGAAGCCACGAAAGCTAGAAAA	0	0	0	0	0	5	2	0	0	0	0	1	0	0	1	2	1	1	0	1	0	1	0	1	1	3	0	1	0	1	1	0	0	3	0	7	1	0	0	0
OTU_121	Chordata	Actinopteri	Perciformes	Percidae	Perca	Perca fluviatilis	98.193	Midori2	GCGGTATACGAGAGGCCCAAGTTGATAGACATCGGCGTAAAGCGTGGTTAAGATTAAAGACAATACTAAAGCCGAACACCTTCAGAGCTGTTATACGCATCCGAAGGTAAGAAGTTCAACCACGAAAGTGGCTTTATTACCCCTGAACCCACGAAAGCTACGATA	977	1911	314	610	143	102	575	474	508	251	470	510	284	136	297	822	1026	1071	1007	325	98	5	144	76	394	206	874	662	240	510	498	520	1234	234	608	606	233	180	0	0
OTU_122	Chordata	Actinopteri	Cypriniformes	Leuciscidae	Squalius	Squalius cephalus	97.076	Midori2	GCGGTTAAACGAGAGGCCCTAGTTAATAATACACGGCGTAGTGTGGTTAAGGAAAACATAACAATAAAGCCGAATGGCCCTTTGGCTGTCATACGCTTCTAGGTGTCCGAAGCCCAATATACGAAAGTAGCTTTAATAAAGTCCACCTGGCCCCACGAAAGCTGAGAAA	347	497	300	291	302	628	318	233	214	621	479	1976	302	586	140	252	444	450	388	265	271	0	192	483	134	192	241	418	2282	342	343	335	374	360	318	294	455	299	0	0
OTU_123	Chordata	Actinopteri	Cypriniformes	Leuciscidae	Rutilus	Rutilus rutilus	97.661	Midori2	GCGGTTAAACGAGAGGCCCCAGTTAATAATACACGGCGTAAAGGGTGGTTAAGGGAAGCACAATAATAAAGCCAAATGGCCCTTTGGCTATACGCTTCTAGGTGTCCGAAGCCCAATATACGAAAGTAGCTTTAATAAAGCCCACCTGACCCCACGAAAGCTGAGAAA	26	33	12	14	8	29	27	25	45	47	20	30	38	35	22	39	29	49	39	39	0	21	11	8	15	26	7	24	6	5	35	9	59	32	19	11	27	20	0	0
OTU_124	Chordata	Actinopteri	Gobiiformes	Gobiidae	Neogobius		95.758	Midori2	GCGGTTACGAGAGGCCCAAGTTGACAAAAAAATCGAAAAGCGTGGTTAGTGATATCACACCACTAAAGCCAAACACCTTCAAGGCTGTAATACGCCCCCGAAGACAGGAAGCCCAATCACGAAAGTAGCTTTAATTTTCATGAAGCCACGAAAGCTAGGAAA	0	0	0	0	0	0	0	0	0	0	0	0	0	0	0	0	0	0	0	0	0	0	0	0	0	0	0	0	0	0	0	0	0	0	0	0	0	0	0	0
OTU_125	Chordata	Actinopteri	Cypriniformes	Leuciscidae	Squalius		96.491	Midori2	GCGGTTAAACGAGAGGCCCTAGTTAATAATACACGGCGTAAAGGGTGGTTAAGGAAAACATAACAATAAAGCCAAATGGCCCTTTTGCTGTCATACGCTTCTAGGTGTCCGAAGCCCAATATACGAAAGTAGCTTTAATATTCCACCTGACCCCACGAAAGCTGAGAAA	4	9	3	3	2	12	7	6	6	15	2	9	4	18	6	7	6	21	6	9	12	0	10	9	4	6	8	5	4	2	8	6	8	10	4	6	5	2	0	0
OTU_126	Chordata	Actinopteri	Cypriniformes	Leuciscidae	Rutilus	Rutilus rutilus	97.661	Midori2	GCGGTTAAACGAGAGGCCCCAGTTAATAATACACGGCGTAAAGGGTGGTTAAGGGGAGCACAATAATAAAGCCAAATGGCCCTTTGGCTGTCATACGCTTCTAGGTGTCCGAAGCCCAATATACGAAAGTAGCTAATAAAGCCCACCTGACCCCACGAAAGCTGAGAAA	7	36	7	41	601	177	420	99	762	1438	475	1228	252	34	17	231	1213	577	23	120	1870	4	7	3	68	26	9	14	5	440	13	615	27	345	740	670	195	12	0	0
OTU_127	Chordata	Actinopteri	Gobiiformes	Gobiidae	Neogobius		96.386	Midori2	GCGGTTATACGAGAGGCCCAAATTGACAAAAATCGGCGAAAAGCGTGGTTAGTGATATCACCTCCACTAAAGCCAAACACCTTCAACCCTGTAATACCCCCCGAAGACAGGAAGCCCAATCACGAAATTAGCTTTAATTTTCATAAAGCCACGAAAGCTAGGAAA	0	0	0	0	0	0	0	0	0	0	0	0	0	0	0	0	0	0	0	0	0	0	0	0	0	0	0	0	0	0	0	0	0	0	0	0	0	0	0	0
OTU_128	Arthropoda	Insecta					71.311	Midori2	GCGGTTATACGAAGGGTCTAAGTTAAACTTATGACATTAATTAAATTAATAGCTTGGTTTTAATGAATACTTAACATGAAATTTAAAGAGGTGAAATTTGCATAATTTTCATATAAAGTATTAGTTAAAACTTGAAAGATTTAGTAAACTCAGGAGA	0	0	0	0	0	0	0	0	0	0	0	0	0	0	0	0	0	0	0	0	0	0	0	0	0	0	0	0	0	0	0	0	22	22	0	0	0	0	0	0
OTU_129	Chordata	Actinopteri	Perciformes	Percidae	Perca		96.988	Midori2	GCGGTTATACGAGAGGCCCAAGTTGATAGACATCGGCGTAAAGCGTGGTTAAGATTAAATACTAAAGCCGAACACCTTCAGAGCTGTTATACGCATCCGAAGGTAAGAAGTTCAACCACGAAAGTGGCTTTATAGCCCCTGAACCCACGAAAGCTACGATA	0	3	0	0	0	0	1	0	2	0	0	2	0	0	1	1	1	0	2	0	0	0	0	1	0	1	1	1	0	1	0	0	1	0	2	0	0	0	0	0
OTU_130	Chordata	Aves	Podicipediformes	Podicipedidae	Podiceps	Podiceps cristatus	100	Midori2	GCGGTCACACAAGAGACCCAAATTAACCGTACACGGCGTAAAGAGTGGTACTATATTATCAAACTAGCTAAGATGAAAGCATAGCTGAGCTGTCATAAGCCTAAGCTACACCTAACTCTCTTCCCGATCCTAGCATTAATGATTGACCACACCCCCACGAAAGCTAAGACA	0	0	0	0	0	0	0	0	0	0	0	0	0	0	0	0	0	0	0	0	0	0	0	0	0	0	0	0	0	0	0	0	0	0	0	0	0	0	0	0
OTU_131	No Match	No Match	No Match	No Match	No Match	No Match	No Match	Midori2	AGGCTCATGGCAAGAGCCCTGCACTGCCCAATTTTTAAGCACCAGCCGCCACGCCAGTGAGGATGCGGCTTGGCGCAGTTGTTCAAGGACTTATCCACACCTTTGGGCACGGTGTTTGGGGGTAAATCACACCGCTAAGGCCCATCAAGCACGCCCCTCCATCACAGGCCGCCT	45	114	58	71	44	38	340	105	6	134	36	96	119	15	194	96	56	92	65	24	1	13	166	359	51	47	30	181	4	1	124	27	137	173	84	46	10	33	0	0
OTU_132	Chordata	Aves	Passeriformes	Corvidae	Pica	Pica pica	100	Midori2	GCGGTCATACAGGAGACCCAAATTAACAATATAACGGCGTAAAGGGTGGTAACATGCTATCTAAGTAACTAAGATTAAAAGGCAACTGAGCCGTAACAAGCCCAAGATGCCCATAAGACCAACTATTAAAGAAGATCTTAGACTAACGATTAATTGAAATCCACGAAAGCCAGGACC	0	0	0	0	0	0	0	0	0	0	0	0	0	0	0	0	0	2398	0	0	0	0	0	0	0	0	0	0	0	0	0	0	0	0	0	0	0	0	0	0
OTU_133	Chordata	Mammalia	Chiroptera	Vespertilionidae	Eptesicus	Eptesicus serotinus	100	Midori2	GCGGTCATACGATTGGGCCAAACTAATAGACATTCGGCGTAAAGGGTGTTTTAGAGACCATGTTAATTAATAAAGTTAAGCCCTAACTAAGCTGTAAAAAGCCCTAGTTACTGTAAAACAAACAACGAAAGTGACTTTAAAAAATCTGACTACACGATAGCTAAGACT	0	0	0	0	0	0	0	0	0	0	0	0	0	0	0	0	0	0	0	0	0	0	0	0	0	0	0	0	0	0	0	0	0	0	0	0	0	0	0	0
OTU_134	Chordata	Actinopteri	Gobiiformes	Gobiidae	Neogobius	Neogobius melanostomus	98.193	Midori2	GCGGTTATACGAGAGGCCCAATTTGACAAAATCGCGAAAAGCGTGGTTAGTGATATCACCTCCACTAAAGCCAAACACCTTCAAGGCTGTAATACGCCCCCGAAGACAGGAAGCCCAATCACGAAAGTAGCTTTAATTTTCATGAAGCCACGAAAGCTAGGAAA	1	3	1	2	1	2	2	0	2	1	2	3	2	0	1	2	4	0	1	3	0	0	1	0	0	0	5	0	2	0	1	1	3	1	2	2	3	1	0	1
OTU_135	Chordata	Actinopteri	Gobiiformes	Gobiidae	Pomatoschistus		96.386	Midori2	GCGGTTATACGAGAGGCCCAAGTTGATAGATGCCGGCGTAAAATGTGGTTAATTTATAGTATTGCACTAAAGCAAAACACCTTCTAAGCTGTTATATGCTCTCGAAGATAGGAGGCCCTTTTACGAAAGTAGCTTTAAATGATATGACCCCACGAAAGCTAGGGAA	0	0	0	0	0	0	0	0	0	0	0	0	0	0	0	0	0	0	0	0	0	0	0	0	0	0	0	0	0	0	0	0	0	0	0	0	0	0	0	0
OTU_136	Chordata	Mammalia	Carnivora				95.706	Midori2	GCGGTCATACGATTAACCCAAACTAATTGGCCCACGGGGTAAAGCGTGTTTAAGATAATACAATACTAAAGTTAAAACTTAACTAAGCCGTAAAAAGCTACAGTTACCATAAAATATGCTACGAAAGTGACTTTAAAATTTTCTGATTACACGATAGCTAAGATC	0	0	0	0	0	0	0	0	0	0	0	0	0	0	0	0	0	0	0	0	0	0	0	0	0	0	0	0	0	0	0	0	0	0	0	0	0	2630	0	0
OTU_137	Chordata	Actinopteri	Cypriniformes	Leuciscidae	Alburnus	Alburnus alburnus	98.235	Midori2	GCGGTTAAACGAGAGGCCCCAGTTAATAATACGCGGCGTAAAGGGTGGTTAAGGAAAGCACAACAATAAAGCCGAATGGCCCTTTGGCTGTCATACGCTTCTAGGTGTCCGAAGCCCAATATACGAAAGTAGCTTTAATAAGGCCCACCTGACCCCACGAAAGCTGAGGAG	0	3	536	182	81	728	166	173	6	4	275	213	192	1	3	157	338	188	41	147	586	0	534	3	1	14	6874	7	1	231	119	94	334	0	315	80	160	636	0	0
OTU_138	Chordata	Actinopteri	Cypriniformes	Tincidae	Tinca		95.977	Midori2	GCGGTTAAACGAGAGGCCCCAGTTAATAATACACGGCGTAAAGGGTGGTTAAGGAAAGTATTAACAATAAAGCCAAATGGCCCCTTGGCCGTCATACGCTTCTAGGTGCCCGAAGCCCAACCACACGAAAGTAGCTTTAACAAAGCCCACCTGACCCCACGAAAGCTGAGAAA	0	225	0	150	0	0	0	0	0	0	0	89	0	0	78	0	0	0	0	0	0	0	0	173	0	0	74	0	0	0	0	89	204	0	0	0	0	0	0	0
OTU_139	Chordata	Aves	Galliformes	Phasianidae	Meleagris	Meleagris gallopavo	100	Midori2	GCGGTCATACAAGAAACCCAAATCAATAGCCATCCGGCGTAAAGAGTGGTCACATGCTATCTATACCAATTAAGATCAAAGTGTAACTAAGCTGTCATAAGCCCAAGATTCACCTAAGCCCAGCCTAAAAAATGATCTTAACTTAACGATCAATTTAAAGCCACGAAAGCCAGGGCA	0	0	0	0	0	0	0	0	0	0	0	0	0	0	0	0	0	0	0	0	0	0	0	0	0	0	0	0	0	0	0	0	0	0	0	0	2093	0	0	0
OTU_140	Chordata	Actinopteri					97.041	Midori2	GCGGTTAAACGAGAGGCCCCAGTTAATAATACACGGCGTAAAGGGTGGTTAAGGATAAATAAAAATAAAGTCAAATGGCCCCTTGGCCGTCATACGCTTCTAGGCGTCCGAAGCCCTAATACGAAAGTAACTTTAATGAACCCACCTGACCCCACGAAAGCTGAGGAA	0	64	0	1	0	113	0	0	46	0	1	0	19	106	1	0	0	13	0	0	0	0	0	124	109	5	1	0	0	0	4	29	2	0	52	0	0	0	0	0
OTU_141	Chordata	Actinopteri	Cypriniformes	Leuciscidae	Alburnus	Alburnus alburnus	97.661	Midori2	GCGGTTAAACGGGCCCTAGTTAATAATACGCGGCGTAAAGGGTGGTTAAGGAAAGCATAACAATAAAGCCGAATGGCCCTTTGGCTTCATACGCTTCTAGGTGTCCGAAGCCCAATATACGAAAGTAGCTTTAATAAGGCCCACCTGACCCCACGAAAGCTGAGGAA	0	0	13	2	0	11	6	1	0	0	7	5	1	0	0	6	6	6	0	0	18	0	5	0	0	0	0	0	0	2	1	0	3	0	3	0	2	10	0	0
OTU_142	Chordata	Actinopteri	Cypriniformes	Leuciscidae	Squalius	Squalius cephalus	97.059	Midori2	GCTGTTAAACGAGAGGCCCTAGTTAATAATACACGGCGTAAAGTGTGGTTAAGGAAAACATAACAATAAAGCCGAATGGCCCTTTGGCTGTCATACGCTTCTAGGTGTCCGAAGCCCAATATACGAAAGTAGCTTTAATAAATTCCACCTGACCCCACGAAAGCTGAAAA	39	57	29	17	26	83	28	25	28	49	54	102	34	69	9	23	50	37	30	16	28	0	10	46	15	20	29	26	48	33	31	25	36	35	38	40	43	33	0	0
OTU_143	Chordata	Actinopteri	Gobiiformes	Gobiidae	Neogobius	Neogobius melanostomus	98.204	Midori2	GCGGTTATACGAGAGGCCCAAGTTGACAAAAATCGGCGAAAAGCGTGGTTAGTGATATCACCTCCACTAAAGCCAAAACACCTTCACGCTGTAATACGCCCCCGAAGACAGGAAGCCCAATCACGAAAGTAGCTTTAATTTTCATGAAGCCACGAAAGCTAGGAAA	1	2	5	2	1	5	3	2	1	0	3	0	4	1	0	5	4	1	3	2	0	2	3	2	1	1	1	3	3	1	2	4	4	5	3	2	6	1	0	0
OTU_144	Chordata	Actinopteri	Gobiiformes	Gobiidae	Neogobius		96.988	Midori2	GCGGTTATACATTGCCCAAGTTGACAAAAATCGGCGAAAAGCGTGGTTAGTGATATCACCTCCACTAAAGCCAAACACCTTCAAGGCTGTAATACGCCCCCGAAGACAGGAAGCCCAATCACGAAAGTAGCTTTAATTTTCATGAAGCCACGAAAGCTAGGAAA	7	4	8	8	9	56	5	7	4	5	4	2	3	4	1	6	5	5	2	1	7	3	6	4	8	4	13	3	5	5	5	3	12	4	3	0	8	6	0	24
OTU_145	Chordata	Mammalia	Eulipotyphla	Talpidae	Talpa	Talpa europaea	100	Midori2	GCGGTCATACGATTAACCCAAGTTAATAGACATACGGCGTAAAGAGTGTTTAGGAGTTTAACAAAATAAAGCCAAGACTTAACTAAGACGTAAAAACCTATAGTTAAAGTAAAAACAAACTACGAAAGTGGCTTTAATACTTTTCTGATTACACTATAGCTAAGGCC	0	2307	0	0	0	0	0	0	0	0	0	0	0	0	0	0	0	0	0	0	0	0	0	0	0	0	0	0	0	0	0	0	0	0	0	0	0	0	0	0
OTU_146	Chordata	Mammalia	Rodentia	Muridae	Micromys	Micromys minutus	100	Midori2	GCGGTCATACGATTAACCCAAACTAATTATTCTCGGCGTAAAACGTGTTAATTAAAACTAAACTAATAGAATCAAAACCCAACTTATATGTGAAAATTCATTGTTAGGATGTAAGATCAACAACGAAAGTCATTCTACAACCCAAAATTACACGATAGCTAAGATC	0	0	0	0	0	0	0	0	0	0	0	0	0	0	0	0	0	0	0	0	0	0	0	0	0	0	0	0	0	0	0	0	0	0	0	0	1671	0	0	0
OTU_147	Chordata	Mammalia	Rodentia	Cricetidae	Microtus		96.951	Midori2	GCGGTCATACGATTAACCCAAACTAATTATTCTCGGCGTAAAACGTGTTACTACTATGCAAAATAGAATTAAAATCCATCCAATATGTAAAAATTCATCGCTGGACCTAAAACCAATGACGAAAGTAATTCTAATAAGCCTGATACACGATAGCTAAGGTA	0	0	0	0	0	0	0	0	0	0	0	0	0	0	0	0	0	0	0	0	0	0	0	0	0	0	0	0	0	0	0	0	0	0	0	0	0	0	0	0
OTU_148	Chordata	Mammalia	Primates	Hominidae	Homo	Homo sapiens	97.006	Midori2	GCGGTTATACGAGAGGCCCAAGTCAATAGAAGCCGGCGTAAAGAGTGTTTTAGATCACCCCCTCCCCAATAAAGCTAAAACTCACCTGAGTTGTAAAAAACTCCAGTTGACACAAAATAGACTACGAAAGTGGCTTTAACATATCTGAACACACAATAGCTAAGACC	25	56	22	36	22	10	32	28	8	46	44	26	12	38	49	66	12	9	127	104	33	42	230	191	199	159	51	3	26	32	42	31	92	24	42	40	10	33	4	8
OTU_149	Chordata	Mammalia	Chiroptera	Vespertilionidae	Myotis	Myotis daubentonii	100	Midori2	GCGGTCATACGATTAGGCCAAACTAATAGACACTCGGCGTAAAGCGTGTTTTAGAAAATAAATAATAAATAAAATTAAACTTTATCTAAGCTGTAAAAAGCCTCAGCTATTGTAAAATACACAACGAAAGTAATTTTAAAAAATCTGATTACACGATAGCTAAGATC	0	0	0	0	0	0	0	0	0	0	481	0	0	0	0	0	0	0	0	0	0	0	0	0	0	1246	0	0	0	0	0	0	0	0	0	0	0	0	0	0
OTU_150	Chordata	Aves	Passeriformes	Turdidae	Turdus	Turdus merula	97.191	Midori2	GCGGTCATACAGGCTCAAATTAACTTTATAACGGCGTAAAGAGTGGTCGCATGTTATCCATTAGCTAAGATTAAAAAGCAACTGAGCTGTCATAAGCCCAAGATGCTCATAAGGCCTCCGTCTTCAAAGAAGATCTTAGAACAACGATCAATTGAATCCACGAAAGCCAGGACC	0	0	0	0	0	0	0	0	0	0	0	0	0	0	0	0	0	0	0	5	0	0	0	0	0	0	3	10	0	0	0	0	0	0	0	0	1	0	0	0
OTU_151	Chordata	Actinopteri	Gobiiformes	Gobiidae	Neogobius		96.988	Midori2	GCGGTTATACGAGAGGCCCAAGTTGACAAAAATCGGCGAAAAGCGTGGTTAGTGATATCACCTCCACTAAAGCCAAACACCTTCTGTAATACGCCCCCGAAGACAGGAAGCCCAATCACGAAAGTAGCTTTAATTTTCATGAAGCCACGAAAGCTAGGAAA	0	0	0	0	1	0	1	0	0	0	0	0	0	0	0	0	0	0	0	0	0	0	0	0	0	0	0	0	0	0	0	0	0	0	0	0	0	0	0	0
OTU_152	Chordata	Actinopteri	Anguilliformes	Anguillidae	Anguilla		96.951	Midori2	GTGTTATACGAGGCTCAAATTGATATTACACCGTAAAGCGTGATTaaaaaacaaaaaaaCTAAAGCCAAACACTTCCCAAGCTGTCATACGCTACCGGAACATAAACGAAGCCCTATAACGAAAGTAGCTTTAACACCTTTGAACTCACGACAGTTGAGTAA	0	0	0	0	0	0	0	0	0	0	0	0	0	0	0	0	0	0	0	0	0	0	0	0	0	0	0	0	0	0	0	0	0	0	0	0	0	0	0	0
OTU_153	Chordata	Actinopteri	Gobiiformes	Gobiidae	Neogobius		96.951	Midori2	GGTTATACGAGAGGCCCAAGTTGACAAAAATCGGAAAAAGCGTGGTTAGTGATATCACCTCCACTAAAGCCAAACACCTTCAAGGCTGTAATACGCCCCCGAAGACAGGAAGCCCAATCACGAATTAGCTTTAATTTTCATTAAGCCACGAAAGCTAGGAAA	1	3	2	2	1	2	3	0	3	0	0	3	1	1	2	3	1	2	1	3	1	5	1	1	2	0	0	0	0	2	2	0	2	2	1	3	1	0	0	0
OTU_154	Chordata	Aves	Charadriiformes	Charadriidae	Vanellus	Vanellus vanellus	100	Midori2	GCGGTCACACAAGAAACCCAAATTAACTGGTTATACGGCGTAAAGCGTGGTGTCATACTATCCAGAAGACTAAGATCAAAATGCAACTGAGCCGTCATAAGCCCACGGTGCACCTAGGATCCCCCTTAAAACGATCTCAGCACCCTATGATTTACTACATCCACGAAAGCTAAGACC	0	0	0	0	0	0	0	0	0	0	0	0	0	0	0	0	0	0	0	0	0	0	0	0	0	0	1	0	0	0	2005	0	0	0	0	0	0	0	0	0
OTU_155	Chordata	Actinopteri	Cypriniformes	Leuciscidae	Rutilus	Rutilus rutilus	97.661	Midori2	GCGGTTAAACGAGAGGCCCCAGTTAATACACGGCGTAAAGGGTGGTTAAGGGAAGCACAATAATAAAGCCAAATGGCCCTTTGGCTGTCATACGCTTCTAGGTGTCCGAAGCCCAATATACGAAAGTAGCTTTAATAAAGCCCACCTGACCCCACGAAAGCTGAGAAA	2814	4008	1051	1985	588	2195	1562	2396	2587	3603	2037	3716	3801	2036	2049	2759	2585	4469	4155	2997	18	2197	1241	952	2616	2914	1851	2634	883	1227	3052	1356	5519	3131	849	1352	2541	2344	0	1
OTU_156	Chordata	Actinopteri	Cypriniformes	Leuciscidae	Rutilus	Rutilus rutilus	97.661	Midori2	GCGGTTAAACGAGAGGCCCTAGTTAATAATACACGGCGTAAAGGGTGGTTAAGGAAAGCATAATAATAAAGCCAAATGGCCCTTTGGCTGTCATACGCTTCTAGGTGTCCGAAGCCCAATATACGAAAGTAGCTTAAAAAGCCCACCTGACCCCACGAAAGCCGAGAAA	3	3	3	6	3	0	0	2	2	1	6	1	6	6	0	0	0	2	1	0	0	0	0	0	0	0	4	1	3	0	5	1	9	22	1	5146	3	4	0	0
OTU_157	Chordata	Actinopteri	Gobiiformes	Gobiidae	Neogobius	Neogobius melanostomus	98.137	Midori2	GCGGTTATACGATAGGCCCAAGTTGACAAAAATCGGCGAAAAGCGTGGTTAGTGATATCACCTCCACTAAAGCCAAACACCTTCAAGGCTGTAATACCCCCCGAAGACAGGAAGCCCAATCACGAAATTAGCTTTAATTTTCATGAAGCCACGAAAGCTAAAA	1	1	1	2	2	1	1	2	1	0	6	4	0	2	1	0	1	1	1	2	0	0	2	2	1	2	0	1	3	3	2	1	2	1	5	1	3	2	0	1
OTU_158	Chordata	Actinopteri	Gobiiformes	Gobiidae	Neogobius		96.988	Midori2	GCGGTTATACGAGAGGCCCAACTTGACAAAAATCGGCGAAAAGCGTGGTTAGTGATATCACCTCCACTAAAGCCAAACACCTTCAAGTCTGTAATACGCCCCCAAGACAGGAAGCCCAATCACGAAAGTAGCTTTAATTTTCAAAGCCACGAAAGCTAGGAAA	0	0	0	0	0	0	0	0	0	0	0	0	0	0	0	0	0	0	0	0	0	0	0	0	0	0	0	0	0	0	0	0	0	0	0	0	0	0	0	0
OTU_159	Chordata	Mammalia					81.366	Midori2	GCGGCCATACGATTAACCCAAGCTAATAAAACTCGGCATAAAGAGTGTTTAAGGTCTTCAGTCAACAAAGTTAAGCTCTATCTAAATCGTAAAAATCTCCAGCTGAAATAAAATATACTACGAAAGGGACTTTAATGTCCTGAGGACACAACAGCTAAGGCA	0	0	0	0	0	0	0	0	0	0	0	0	0	0	0	0	0	0	0	0	0	0	833	663	291	0	0	0	0	0	0	0	0	0	0	0	0	0	0	0
OTU_160	Chordata	Actinopteri	Cypriniformes	Leuciscidae			93.605	Midori2	GCGGTTAAACGAGAGGCCCCAGTTAATAATACACGGCGTAAAGGGTGGTTAAGGAAAGTATTAACAATAAAGTCAAATGGCCCCTTGGCCGTCATACGCTTCTAGGAGTCCGAAGCCCTAATACGAAAGTAACTTTAATAAACCCACCTGACCCCACGAAAGCTAGGAAA	169	365	312	475	340	701	376	402	247	419	335	834	437	472	723	420	578	511	698	382	58	0	72	89	228	231	591	343	312	290	658	270	885	519	179	207	188	225	0	0
OTU_161	Chordata	Actinopteri	Gobiiformes	Gobiidae	Neogobius	Neogobius melanostomus	97.516	Midori2	GCGGTTATACGAGAGGCCCAAGTTGACAAAAATCGGCGAAAAGCGTGGTTATATCACCTCCACTAAAGCCAAACACCTTCAAGGCTGTAATACGCCCCCGAAGACAGGAAGCCCAATCACGAAAGTAGCTTTAATTTTCATGAAGCCACGAAAGCTAAAA	0	0	0	0	0	0	1	0	0	0	0	0	0	0	0	0	0	0	0	0	0	0	0	0	0	0	0	0	0	0	0	0	0	0	0	0	0	0	0	0
OTU_162	Chordata	Mammalia	Rodentia	Cricetidae	Microtus	Microtus arvalis	98.113	Midori2	GCGGTCATACGATTAACCCAAACTAATTATTCTCGGCGTAAAACGTGTTACTAGAAATATGCAAAATAGAATTAAAATCCATCCAATATGTGAAAATTCATCGCTGGACCTAAAACCAATGAAAAGTAATTCTAATAAGCCTATACACGATAGCTATGTA	0	0	0	0	0	0	0	0	0	0	0	0	0	0	0	0	0	0	0	0	0	0	0	0	0	0	0	0	0	0	0	0	0	0	0	0	0	0	0	0
OTU_163	Chordata	Mammalia	Artiodactyla	Bovidae			96.951	Midori2	GCGGTCATACGATTAACCCAAGCTAACAGGCTGCGTAAAACGTGTTAAAGCACCATACCAAATAGGGTTAAATTCTAACTAAGCTGTAAAAAGCCATGATTAAAATAAAAATAAATGACGAAAGTGACCCTACAATAGCCGACGCACTATAGCTAAGACC	0	0	1	0	0	0	0	0	0	1	0	0	0	0	0	0	0	0	0	0	0	0	0	0	1	0	0	0	0	0	0	0	0	0	0	0	0	0	0	0
OTU_164	Chordata	Actinopteri	Cypriniformes	Leuciscidae	Rutilus	Rutilus rutilus	97.024	Midori2	CCGTTAAACGAGAGGCCCTAGTTAATAATACACGGCGTAAGGGTGGTTAAGGGGACCACAATAATAAAGCCAAATGGCCCTTTGCCTGTCATACGCTTCTAGGTTCCGAAGCCCAATATACGAAAGTAGCTTTAATAAAGCCCACCTGACCCCACGAAAGCTGAGAAA	0	0	0	0	0	0	0	0	0	0	0	0	0	0	0	0	0	1	0	0	0	0	0	0	0	0	0	0	0	0	0	0	0	0	0	0	0	0	0	0
OTU_165	Chordata	Mammalia	Perissodactyla	Equidae	Equus	Equus caballus	100	manual check	GCGGTCATACGATTAACCCAAATTAATAAACCCTCCGGCGTAAAGCGTGTCAAAGACTAATACCAAAATAAAGTTAAAACCCAGTTAAGCCGTAAAAAGCTACAACCAAAGTAAAATAGACTACGAAAGTGACTTTAATACCTCTGACTACACGATAGCTAAGACC	0	0	0	0	0	0	0	0	0	0	0	1	0	0	0	0	0	0	0	0	0	0	0	0	0	0	0	0	0	0	0	0	0	0	0	0	0	0	0	0
OTU_166	Chordata	Actinopteri	Gobiiformes	Gobiidae	Neogobius		96.988	Midori2	GCGGTTATACGAGAGGCCCAAGTTGACAAAAATCGAAAAGCGTGGTTAGTGATATCACCTCCACTAAAGCCAAACACCTTCAAGCTGTAATACGCCCCCGAAGACAGGAAGCCCAATCACGAAAGTAGCCTTAATTTTCATGAAGCCACGAAAGCTAGGAAA	3	24	14	10	12	16	16	10	5	12	10	10	8	20	9	13	8	5	10	9	8	8	8	21	12	9	4	3	17	7	3	13	14	16	9	11	9	12	0	4
OTU_167	Chordata	Mammalia					82.911	Midori2	GCAGCCATACAATTAACCTGAGCTAATAGAACTCAGCATAAAGAGTGTTTTAGGTCTATCCTTAATAAAGCTAAGCTTCATCTCAGTTGTATAAAACCCGGGCTGAAATAAAATAAACTATGAAGGAGGCTTTAATACTTCTGAAGACACAATAGCTAAGACC	0	0	0	0	0	0	0	0	0	0	0	0	0	0	0	0	0	0	0	1004	0	0	634	0	0	0	0	0	0	51	0	0	0	0	0	0	0	0	0	0
OTU_168	No Match	No Match	No Match	No Match	No Match	No Match	No Match	Midori2	GCTCAAACAGGCCGCTGTAGCCCACGCCCATGATGAGCAACGCACTCACGATGAAGGCCCCTGTGGCTTCCGGCAGGGTCACGCCCTGCGTCACGGCCAACACCGCCGCACCGGGCGTTGACCATGCCGTCAACACCGGTTGCCGGTACCACAGGCTCAAGAC	47	30	34	43	19	10	22	22	35	43	28	8	8	34	54	29	45	91	40	55	75	87	45	78	86	176	6	57	23	3	133	54	12	24	42	9	10	6	0	0
OTU_169	Chordata	Actinopteri	Perciformes	Percidae	Perca		96.386	Midori2	GCGGTTATACGAGAGGCCCAAGTTGATAGACATCGGCGTAAAGCGTGGTTAAGATTAAAGATAATATTAAAGCCGAACACCTTCAGAGCTGTTATACGCATCCGAAGGTAAGAAGTTTAATTATGAAAGTGGCTTTATAGCCCCTGAACCCACGAAAGCTACGATA	0	0	0	0	0	0	0	0	0	0	0	0	1	0	0	0	0	0	0	1	0	0	0	0	0	0	0	0	1	0	0	0	0	0	1	0	0	1	0	0
OTU_170	Chordata	Actinopteri	Cypriniformes	Leuciscidae	Squalius	Squalius cephalus	98.246	Midori2	GCGGTAGACGAGAGGCCCTAGTTAATAATACACGGCGTAAAGGGTGGTTAAGGAAAACATAACAATAAAGCCGAATGGCCCTTTGGCTGTCATACGCTTCTAGGTGTCCGAAGCCCAATATACGAAAGTAGCTTTAATAAAGTCCACCTGACCCCACGAAAGCTGAGAAA	64886	89758	53585	42972	52467	126287	57853	51065	45274	115643	95108	87688	50302	106728	26640	49993	83382	73521	43142	39100	46765	2	30632	63264	24773	36844	54048	61251	87730	77528	63810	47334	70980	65291	67834	56639	77979	53281	0	0
OTU_171	Chordata	Actinopteri	Cypriniformes	Tincidae	Tinca		96.532	Midori2	GCGGTTAAACGAGAGGCCCTAGTTAATAATACACGGCGTAAAGGGTGGTTAAGGGAAGCACAATAATAAAGCCAAATGGCCCCTTGGCCGTCATACGCTTCTAGGTGCCCGAAGCCCAACCACACGAAAGTAGCTTTAACAAAGCCCACCTGACCCCACGAAAGCTGAGAAA	0	97	0	35	0	0	0	0	0	0	0	43	0	0	23	0	0	0	0	0	0	0	0	12	0	0	13	0	0	0	0	17	61	0	0	0	0	0	0	0
OTU_172	Chordata	Mammalia	Rodentia	Cricetidae	Microtus		96.341	Midori2	GCGGTCATACGATTAACCCAAACTAATTATTCTCGGCGTAAAACGTGTTACTAGAAATATGCAAAATAGAATTAAAATCCATCCAATATGTGAAAATTCATCGCTGGACCTAAAACCAAAAGTAATTCTAATAAGCCTGATACACGATAGCTAAGGTA	0	0	0	0	0	0	0	0	0	0	0	0	0	0	0	0	0	0	0	0	0	0	0	0	0	0	0	0	0	0	0	0	0	0	0	0	0	0	0	0
OTU_173	Chordata	Aves	Columbiformes	Columbidae			94.857	Midori2	GCGGTCACACAAGAGACCCAAACTAATCGTTCGCGGCGTAAAGAGTGGACTCATGCTTATCACATTAATTAAGGTCAAAACGTAGCTGAGCTGTCATAAGCTTAAGATACACTTAAAACCACCCTAAAGATGGCCCTAATTCTTATGACTTACTAAACTCCACGAAAGCCAGGGCA	0	0	0	0	0	0	0	0	0	0	0	0	0	0	0	0	0	0	0	0	0	0	0	0	529	0	427	0	0	0	0	0	0	0	580	0	0	0	0	0
OTU_174	Chordata	Actinopteri	Anguilliformes	Anguillidae	Anguilla		96.988	Midori2	CGGTTATACGTTGGCTCAAATTGATATTACACGCGTAAAGCGTGATTaaaaaacaaaaaaaCTAAAGCCAAACACTTCCCAAGCTGTCATACGCTACCGGAACATAAACGAAGCCCTATAACGAAATTAGCTTTAACACCTTTGAACTCACGACAGTTGAGGAA	0	0	0	0	0	0	0	0	0	0	0	0	0	0	0	0	0	0	0	0	0	0	0	0	0	0	0	0	0	0	0	0	0	0	0	0	0	0	0	0
OTU_175	Chordata	Actinopteri	Perciformes	Percidae	Perca		96.988	Midori2	GCGGTTATACGAGAGGCCCAAGTTGATAGACATCGGCGTAAAGCGTGGTTAAGATTAATACAATACTAAAGCCGAACACCTTCAGAGCTGTTATACGCATCCGAAGGTAAGAAGTTCAACCACGAAAGTGGCTTTACCCCCCTGAACCCACGAAAGCTACGATA	0	0	0	0	0	0	0	0	0	0	0	0	0	0	1	0	0	0	0	0	0	0	0	0	0	0	0	0	0	2	0	0	0	0	0	0	0	0	0	0
OTU_176	Chordata	Mammalia	Rodentia	Cricetidae	Microtus	Microtus arvalis	97.5	Midori2	GCTCATACGATTAACCCAAACTAATTATTCTCGGCGTAAAACGTGTTACTAGAAATATGCAAAATAGAAAATCCATCCAATATGTGAAAATTCATCGCTGGACCTAAAACCAATGACGAAAGTAATTCTAATAAGCCTGATACACGATAGCTAAGGTA	0	0	0	0	0	0	0	0	0	0	0	0	0	0	0	0	0	0	0	0	0	0	0	0	0	0	0	0	0	0	0	0	0	0	0	0	0	0	0	0
OTU_177	Chordata	Actinopteri	Perciformes	Percidae	Perca		96.988	Midori2	GCGGTTATACGAGAGGCCCAAGTTGATAGACATCGGCGTAAAGCGTGGTTAAGATTAAAGACAATACTAAAGCCGAACACCCCCAAAGCTGTTATACGCATCCGGAGGTGAGAAGTTCAACCACGAAAGTGGCTTTATAGCCCCTGAACCCACGAAAGCTACGATA	0	4	2	3	2	3	1	0	0	1	0	7	2	3	2	10	2	2	2	0	0	0	10	1	2	2	3	3	6	1	0	0	7	1	1	5	2	1	0	0
OTU_178	Chordata	Actinopteri	Cypriniformes	Leuciscidae	Squalius	Squalius cephalus	97.076	Midori2	GCGGTTATACGAGAGGCCCTAGTTAATAATACACCGTAAAGGTTGGTTAAGGAAAACATAACAATAAAGCCGAATGGCCCTTTGGCTGTCATACGCTTCTAGGTGTCCGAAGCCCAATATACGAAAGTAGCTTTAATAAAGTCCACCTGACCCCACGAAAGCTGAGAAA	24	20	6	4	10	19	5	10	6	15	15	153	22	17	2	7	11	8	6	4	8	0	8	56	7	5	11	11	23	6	13	20	13	6	20	18	38	10	0	0
OTU_179	Chordata	Actinopteri	Cypriniformes	Leuciscidae	Vimba/Blicca	Vimba vimba / Blicca bjeorkna	98.246	manual check	GCGGTTAAACGAGAGGCCCCAGTTAATAATACACGGCGTAAAGGGTGGTTAAGGAAAGTATAACGATAAAGCCGAATGGCCCTTTGGCTGTCATACGCTTCTAGGTGTCCGAAGTCCAATATACGAAAGTAACTTTAATAAACCCACCTGACCCCACGAAAGCTGAGAAA	58	88	169	184	299	172	233	177	136	168	146	162	230	253	356	265	262	184	240	238	25	0	45	33	106	198	150	145	144	116	313	146	304	303	108	161	116	123	0	0
OTU_180	Chordata	Actinopteri	Anguilliformes	Anguillidae	Anguilla		96.988	Midori2	CGGTTATACGAGGGGCTCAAATTGATATTACACGGCGTAAAGCGTGATTaaaaaacaaaaaaCTAAAGCCAAACACTTCCCACCTGTCATACGCTACCGGAACATAAACGAATCCCTATAACGAAAGTAGCTTTAACACCTTTAACTCACGACAGTTGAGGAA	0	1	0	0	0	0	0	0	0	0	1	0	0	0	0	0	0	0	0	0	0	0	0	0	0	0	0	0	0	0	0	0	0	0	0	0	0	0	0	0
OTU_181	Chordata	Mammalia	Rodentia	Cricetidae	Microtus		95.062	Midori2	GTAGTCATACGATTAACCCAAACTAATTATTCTCGGCGTAAAACATGTTACTAGAAACATGCAAAAATAGAATTAAAATACATCCAATATGTGAAAATTCATCGCTGGACCTAAAAACAATACCAAAAGTAATTCTAATAAACCTGATACACGATAGCTAAGATA	0	0	0	0	0	0	0	0	1413	0	0	0	0	0	0	0	0	0	0	0	0	0	0	0	0	0	0	0	0	0	0	0	0	0	0	0	0	0	0	0
OTU_182	Chordata	Actinopteri	Perciformes	Percidae	Perca	Perca fluviatilis	97.59	Midori2	GCGGTTATACGAGAGGCCCAAGTTGACACATCGCGTAAAGCGTGGTTAAGATTAAAGACAATACTAAAGCCGAACACCTTCAGAGCTGTTATACGCATCCGAAGGTAAGAAGTTCAACCACGAAAGTGGCTTTATAGCCCCTGAACCCACGAAAGCTACGATA	2	1	1	0	1	1	0	0	0	1	1	0	0	1	0	1	3	0	0	1	2	0	0	0	2	1	0	0	0	0	0	0	1	2	0	0	0	0	0	0
OTU_183	Chordata	Actinopteri	Gobiiformes	Gobiidae	Neogobius		96.386	Midori2	GCGGTTATACGAGAGGCCCAAGTTGACAAAAATCGGCGAAAAGCGTGGTTAGTGATATCACCTCCACTAAAGCCAAACACCTTCAAGGCTGTAATACGCCCCCGAAGACAGGAAGCCCAATCACGAAAGTAGCTTTAATTTTCATGAATAGCAAGCTAGGAAA	1	1	0	3	2	2	1	1	0	1	1	0	1	0	1	2	1	1	0	0	1	0	1	0	0	1	1	0	1	0	0	1	3	0	2	1	2	0	0	0
OTU_184	Chordata	Actinopteri	Gobiiformes	Gobiidae	Neogobius		96.988	Midori2	GCGGTTATACGAGAGGCCCAACTTGACAAAAATCGGCGAAAAGCGTGGTTAGTGATATCACCTCCACTAAAGCCAAACACCTTCAAGGCTGTAATACGCCCCCGAAGACAGGAAGCCCAATCACGAATAGCTTTAATTTTCATGAAGCCAAAAGCTAGGAAA	0	0	0	0	0	0	0	0	0	1	0	0	0	0	0	0	0	0	0	0	0	0	0	0	0	0	0	0	0	0	0	0	1	0	0	0	0	0	0	0
OTU_185	Chordata	Actinopteri	Cypriniformes	Leuciscidae	Leuciscus	Leuciscus aspius	98.246	Midori2	GCGGTTAAACGAGAGGCCCTAGTTAATAATACACGGCGTAAAGGGTGGTTAAGGAAAGCATAACAATAAAGGAATGGCCCCTTGGCTGTCATACGCTTCTAGGTGTCCGAAGCCCAATATACGAAAGTAGCTTTAATAAGGCCCACCTGACCCCACGAAGGCTGAGGAA	0	44	1	72	0	2	3	0	0	54	58	66	1	0	109	82	8	18	66	47	1	1	1	57	64	112	2	39	0	0	58	27	3	7	29	104	34	5	0	0
OTU_186	Chordata	Actinopteri	Cypriniformes	Leuciscidae	Rutilus	Rutilus rutilus	97.661	Midori2	GCGGTTATACGAGAGGCCCTAGTTAATAATACACGGCGTAAAGGGTGGTTAAGGGGAGCACAATAATAAAGCCAAATGGCCCTTTGGCTGTCATACGCTTCTAGGTGTCCGAAGCCCAATATAAAAGTAGCTTTAATAAAGCCCACCTGACCCCACGAAAGCTGAGAAA	76	99	102	69	462	96	252	74	618	689	454	1131	268	187	37	220	639	381	32	73	1094	17	13	6	100	18	52	16	34	233	112	473	152	354	394	374	208	23	0	0
OTU_187	Chordata	Mammalia	Rodentia	Cricetidae	Microtus		96.97	Midori2	GCGGTCATACGATTAACCCAAACTAATTATTCTCGGCGTAAAAACGTGTTACTAGAAATATGCAAAATAGAATTAAAATCCATCCAATATAAAAATTCATCGCTGGACCTAAAACCAATGACGAAAGTAATTCTAATAAGCCTATACACGATAGCTAAGGTA	0	0	0	0	0	0	0	0	0	0	0	0	0	0	0	0	0	0	0	0	0	0	0	0	0	0	0	0	0	0	0	0	0	0	0	0	0	0	0	0
OTU_188	Chordata	Actinopteri	Cypriniformes	Leuciscidae	Abramis		95.93	Midori2	GCGGTTAAACGAGAGGCCCCAGTTAATAATACACGGCGTAAAGGGTGGTTAAGGAATGTATTAACAATAAAGCCGAATGCCCCTTCCCTGTCATACTCTTCTAGGTGTCCGAAGTTCAACATATGAAAGTAGCTTTAATAACGCCCACCTGACCCCACGAAAGCTGAGAAA	0	0	0	0	0	0	0	0	0	0	0	0	0	0	0	0	0	0	0	0	0	0	0	0	0	0	0	0	0	0	0	0	0	0	0	0	0	0	0	0
OTU_189	Chordata	Actinopteri	Gobiiformes	Gobiidae	Neogobius	Neogobius melanostomus	98.802	Midori2	GCGGTTATACGAGAGGCCCAAGTTGACAAAAAATCGGCGAAAGCGTGGTTAGTGATATCACCTCCACTAAAGCCAAACACCTTCAAGGCTGTAATACGCCCCCGAAGACAGGAAGCCCAATCACGAAAGTAGCTTTAATTTTCATGAAGCCACGAAAGCTAGGAAA	136	134	140	279	156	188	368	114	144	178	157	200	112	439	153	181	181	174	134	111	178	185	213	200	184	121	218	164	106	132	180	173	213	131	150	155	114	149	0	1856
OTU_190	Chordata	Actinopteri	Cypriniformes				96.45	Midori2	GCGGTTAGACGAGAGGCCCTAGTTGATATTACAACGGCGTAAAGGGTGGTTAAGGATAAACAAAAATAAAGTCAAATGGCCCCTTGGCCGTCATACGCTTCTAGGAGTCCGAAGCCCTAATACGAAAGTAATAAACCCACCTGACCCCACGAAAGCTGAGAAA	0	0	0	0	0	0	0	0	0	0	0	0	0	0	0	0	0	0	0	0	0	0	0	0	0	0	0	0	0	0	0	0	0	0	0	0	0	0	0	0
OTU_191	Chordata	Mammalia	Rodentia	Castoridae	Castor	Castor fiber	98.16	Midori2	GCGTCATACGATAGACCCAAACTAATAAACCCCCGCGTAAAGCGTGTTTAAGAGCCTTACCCTGAATAAGAATAAACTTTACCTAGTCGTAAAAAGCTATAGCTAAGGAAAAAATAACTTACGAAAGTAATCTTAATAAGTCTGATAACACGACAGCTAAGACC	0	0	0	0	0	0	0	0	0	0	0	0	0	0	0	0	0	0	0	0	0	0	0	0	0	0	0	0	0	0	0	0	0	0	0	0	0	0	0	0
OTU_192	Chordata	Mammalia	Rodentia	Cricetidae	Microtus	Microtus ilaeus	98.16	Midori2	GTGGTCATACGATTAACCCAAACTAATTATTCTCGGCGTAAAACGTGTTACTAGAAACATGCAAAAATAAAATTAAAATCCATCCAATATGTGAAAATTCATCGCTGGACCTAAAACCAATGACGAAAGTAATTCTAATAAACCTGATACACGATAGCTAAGATA	0	0	0	0	0	0	0	0	1167	0	0	0	0	0	0	0	0	0	0	0	0	0	0	0	0	0	0	0	0	0	0	0	0	0	0	0	0	0	0	0
OTU_193	Chordata	Actinopteri	Cypriniformes				96.45	Midori2	GCGGTTATACGAGAGGCCCTAGTTGATATTATAACGGCGTAAAGGGTGGTTAGGGATAAATAATAATAAAGCCAAATGGCCCCTTGGCCGTCATACGCTTCTAGGAGTCCGAAGCCCTAATACGAAAGTAACTTTAATAAACCCACCTGACCCCACGAAAGCTGAGAAA	33	97	284	217	73	80	415	273	138	93	208	270	330	217	239	267	189	200	216	170	0	0	117	118	129	89	162	244	101	80	293	131	106	141	86	66	86	84	0	0
OTU_194	Chordata	Actinopteri	Cypriniformes	Leuciscidae	Abramis		96.491	Midori2	GCGGTTAAACGAGAGGCCCCAGTTAATAATACACGGCGTAAAGTGTGGTTAAGGAAAGTATTAACAATAAAGCCGAATGGCCCTTTGGCTTTCATACGCTTCTAGGTGTCCGATTTCAACATACGAAAGTAGCTTTAATAACCCCACCTGACCCCACGAAAGCTGAAAA	1	0	0	0	0	1	0	1	0	0	0	0	0	0	0	0	0	0	0	0	0	0	0	0	0	0	0	0	0	0	0	0	0	0	0	0	0	0	0	0
OTU_195	Chordata	Actinopteri	Perciformes	Percidae	Sander		96.988	Midori2	GCGGTTATACGAGAGGCCCAAGTTGATAGACATCGGCGTAAAGCGTGGTTAAGATTAAAGACAAAACTAAAGCCGAACACCTTCAGAGCTGTTATACGCACCCGAAGGTAAGAAGTTCAACCACGAAAGTGGCTTTATTACCCCTGAACCCAAAAGCTACGATA	66	175	14	71	5	31	30	58	30	42	40	107	21	8	14	48	77	126	117	13	9	0	18	5	30	12	135	67	22	33	64	36	207	22	60	40	16	29	0	0
OTU_196	Chordata	Actinopteri	Cypriniformes	Leuciscidae	Leuciscus	Leuciscus leuciscus	97.076	Midori2	GCGGTTAAACGAGAGGCCCCAGTTAATAATACACGGCGTAAAGGGTTAAGGAAAGCACAATAATAAAGCCAAATGGCCCTTTGGCTGTCATACGCTTCTAGGTGTCCGAAGCCCAATATACGAAAGTAGCTTTAACAAAGCCCACCTGACCCCACGAAAGCTGAGAAA	454	399	403	244	284	30	16	171	282	233	714	282	217	533	101	184	36	538	132	78	0	24	15	20	394	36	552	24	254	113	556	535	1899	906	68	105	376	132	0	0
OTU_197	Chordata	Actinopteri	Perciformes				93.333	Midori2	GCGGTTATACGAGAGGCCCAAGTTGATAGACATCGGCGTAAAGCGTGGTTAAGACAAAAACAAAACTAAAGCCGAACACCCCCAAAGCTGTTATACGCATCCGGAGGTGAGAAGTTCAACCACGAAGGTGGCTTTATCTAACCTGAACCCACGAAAGCTACGATA	20	40	28	62	11	10	5	15	18	22	29	25	17	6	10	37	34	49	33	42	0	0	11	15	10	5	63	38	14	36	20	15	77	1	29	29	32	72	0	0
OTU_198	Chordata	Mammalia	Rodentia	Castoridae	Castor		96.988	Midori2	GCGGTCATACGATAGACCCAAGCTAATAAACCCCGGCGTAAAGCGTGTTTAAGAGTCCCACCCTGAATAAGAATAAACTTTACCTAGGCCGTAAAAAGCTATAGCTAAGGAAAAAATAACTTACGAAAGTAATCTTAACAAGTCTGATAACACGACAGCTAAGACC	0	0	0	0	0	0	1	0	0	0	0	0	0	0	2	0	0	0	0	0	0	0	0	0	0	0	4357	0	0	0	0	0	0	0	0	0	0	0	0	0
OTU_199	Chordata	Actinopteri	Perciformes	Percidae	Perca		96.988	Midori2	GCGGTTATACGAGAGGCCCAAGTTGATAGACATCGGCGTAAAGCGTGGTTAAGATTAAAGACAATACTAAAGCCGAACACCTTCAGAGCTATACGCATCCGAAGGTAAGAAGTTCAACCACGAAAGTGGCTTTATTACCCCTGAACCCACGAAAGCTACGATA	9	27	2	8	1	3	16	6	10	5	2	6	8	4	3	11	11	10	12	2	2	2	2	0	5	4	12	12	3	4	10	9	14	1	16	12	1	4	0	0
OTU_200	Chordata	Actinopteri	Perciformes	Percidae	Perca		96.988	Midori2	GCGGTGATACGAGAGGCCCAAGTTGATAGACCTCGGCGTAAAGCGTGGTTAAGATTAAAGACAATACTAAAGCCGAACACCTTCAGAGCTGTTATACGCATCCGAAGGTAAGAAGTTCAACCACGAAAGTGGCTTTATAGCCCTTGAACCCACGAAATCTGCGATA	415	530	41	73	160	48	88	207	62	33	190	74	301	63	69	87	95	239	109	26	18	73	74	42	66	53	68	42	57	96	59	49	86	60	273	221	175	49	0	0
OTU_201	Chordata	Actinopteri	Cypriniformes	Cyprinidae	Capoeta		95.322	Midori2	GCGGTTAGACGGCCCTAGTTGATATTATAACGGCGTAAAGGGTGGTTAGGGATAAATAATAATAAAGCCAAATGGCCCCTTGGCCGTCATACGCTTCTAGGTGTCCGAGGCCCTATATACGAAAGTAGCTTTAATAAAGCCCACCTGACCCCACGAAAGCTGAGAAA	121	157	350	266	75	63	363	314	222	142	273	223	532	324	250	430	242	305	217	265	0	121	328	241	176	164	253	432	132	69	349	249	256	247	143	72	127	122	0	0
OTU_202	Chordata	Actinopteri	Cypriniformes	Leuciscidae	Leuciscus		96.491	Midori2	GCGGTTAAACGAGAGGCCCCAGTTAATAATACACGGCGTAAAGGGTGGTTAAGGACTATTAACAATAAAGCCGAATGGCCCTTTGGCTGTCATACGCTTCTAGGTGTCCGAAGCCCAATATACGAAAGTAGCTTTAATAAAGCCCACCTGACCCCACGAAAGCTGAGAAA	127	145	131	121	116	213	117	153	106	261	226	226	230	297	176	258	179	250	234	219	119	140	124	95	103	138	304	172	102	80	323	224	471	285	110	97	101	186	0	0
OTU_203	Chordata	Actinopteri	Cypriniformes	Leuciscidae	Leuciscus	Leuciscus aspius	97.674	Midori2	GCGGTTAGACGAGAGGCCCTAGTTGATATTACAACGGCGTAAAGGGTGGTTAAGGAAAGCATAACAATAAAGTCGAATGGCCCCTTGGCTGTCATACGCTTCTAGGTGTCCGAAGCCCAATATACGAAAGTAGCTTTAATAAGGCCCACCTGACCCCACGAAAGCTGAGGAA	0	18	30	57	6	22	9	7	0	57	45	103	11	1	111	78	18	26	61	27	12	0	4	32	44	62	3	35	0	7	27	15	1	10	26	45	17	5	0	0
OTU_204	Chordata	Actinopteri	Gobiiformes	Gobiidae	Neogobius	Neogobius melanostomus	98.137	Midori2	GCGGTTATACGAGAGGCCCAAGTTGACAAAAATCGGCGAAAAGCGTGGTTAGTGATATCACCTCCACTAAAGCCAAACACCTTCAAGGCTGTAATACGCCCCCGAAGACAGGACCCCAATCACGAAGGTAGCTTTAATTTTCATGAAGCCACGAAAGCTAAAA	16	17	16	22	23	32	31	27	17	23	11	26	24	24	12	31	25	16	12	18	28	24	14	30	16	15	14	27	18	15	17	14	18	23	20	15	15	20	0	4
OTU_205	Chordata	Actinopteri	Cypriniformes	Leuciscidae	Leuciscus	Leuciscus leuciscus	98.246	Midori2	GCGGTTAAACGAGAGGCCCCAGTTAATAATACACGGCGTAAAGGGTGGTTAAGGAAAGCCAATAATAAAGCCAAATGGCCCTTTGCCTGTCATACGCTTCTAGGTGTCCGAAGCCCAATATACGAAAGTAGCTTTAATAAAGCCCACCTGACCCCACGAAAGCTGAGAAA	13	19	16	13	22	2	4	8	17	7	31	4	11	22	2	14	5	31	11	10	0	2	0	0	26	6	85	0	17	6	34	24	52	51	0	8	13	16	0	0
OTU_206	Chordata	Actinopteri	Perciformes	Percidae			93.976	Midori2	GCGGTTATACGAGAGGCCCAAGTTGATAGACATCGGCGTAAAGAGTGGTTAAGCTAAAATTAAAACTAAAGCCGAACACCCCCAAAGCTGTTATACGCATCCGAAGGTAAGAAGTTCAACCACGAAAGTGGCTTTATAGCCCCTGAACCCACGAAAGCTACGATA	5	21	1	2	1	2	0	1	0	0	0	3	1	3	0	5	2	7	1	1	0	0	5	0	17	0	3	9	4	6	0	1	5	1	2	12	1	1	0	0
OTU_207	Chordata	Actinopteri	Gobiiformes	Gobiidae	Ponticola		95.122	Midori2	GCGGTTATACGAGAGGCCCAAGTTGACAAAAATCGGCGAAAAGCGTGGTTAATAACTTATTTACTAAAGCCAAACACCTTTAAGGCTGTTATACGCCCCCAAAGGTAGGAAGACCCCTCACGAAAGTAGCTTTAATTTTCATGAAGCCACGAAAGCTAGGAAA	83	106	149	219	23	32	77	66	54	178	108	57	79	95	61	138	92	198	116	65	73	0	126	169	79	72	58	53	55	69	129	86	131	102	120	117	103	110	0	0
OTU_208	Chordata	Actinopteri	Cypriniformes	Leuciscidae	Leuciscus		95.152	Midori2	GCGGTTAAACGAGAGGCCCTAGTTAATAATACACGGCGTAAAGGGTGGTTAAGGAGAGCATAACAATAAAGCCGAATGGCCCTTTGGCTGTCATACGCTTCTAGGTGTCCGAAGCCCAATATACGAAAGTGGCTTTATAGCCCCTGAACCCACGAAAGCTACGATA	14	33	18	12	9	7	13	17	9	7	19	35	31	48	20	47	29	31	33	21	4	19	12	10	6	18	12	23	12	14	16	20	35	26	12	12	9	4	0	0
OTU_209	Chordata	Actinopteri	Cypriniformes	Leuciscidae	Rutilus	Rutilus rutilus	97.661	Midori2	GCGGTTATACGAGAGGCCCAAGTTAATAATACACGGCGTAAAGGGTGGTTAAGGGAAGCACAATAATAAAGCCAAATGGCCCTTTGGCTGTCATACTCTCCTAGGTGTCCGAAGCCCAATATACGAAAGTAGCTTTAATAAAGCCCACCTGACCCCACGAAAGCTGAGAAA	118	214	139	116	45	49	100	218	151	108	103	116	334	111	100	180	113	182	167	114	2	52	38	59	115	220	94	118	48	71	182	101	163	136	46	82	159	143	0	0
OTU_210	Chordata	Actinopteri	Perciformes	Percidae	Sander		96.97	Midori2	GCGGTTATACGAGAGGCCCAAGTTAGACATCGGCGTAAAGCGTGGTTAAGACAAAAACAAAACTAAAGCCGAACACCTTCAGAGCTGTTATACGCACCCGAAGGTAAGAAGTTCAACCACGAAAGTGGCTTTATAGCCCCTGAACCCACGAAAGCTACGATA	12	27	7	17	4	4	5	6	6	2	5	14	1	3	10	16	21	14	7	6	1	0	1	2	8	5	12	17	1	16	13	16	29	2	11	10	4	2	0	0
OTU_211	Chordata	Actinopteri	Perciformes	Percidae	Sander		96.97	Midori2	GCGGTTATACGAGAGGCCCAAGTTGATAAACATCGGCGTAAAGCGTGGTTAAGACAAAAACAAAACTAAAGCCGAACACCTTCAGAGCTGTTATACGCACCCGAAGGTAAGAAGTTCACGAAAGTGGCTTTATTACCCCTGAACCCACGAAAGCTACGATA	15	36	11	31	18	5	14	20	31	18	27	24	3	2	9	25	25	34	13	11	28	0	3	5	24	15	26	37	7	33	17	17	29	20	15	16	6	10	0	0
OTU_212	Chordata	Actinopteri	Cypriniformes	Leuciscidae	Squalius	Squalius cephalus	98.83	Midori2	GCGGTTAAACGAGAGGCCCTAGTTAATAATACACGGCGTAAAGGGTGGTCAAGGGAAACATAACAATAAAGCCGAATGGCCCTTTGGCTGTCATACGCTTCTAGGTGTCCGAAGCCCAATATACGAAAGTAGCTTTAATAAAGTCCACCTGACCCCACGATAGCTGAGGAA	47	43	21	27	40	58	46	27	35	59	40	76	5483	66	11	23	67	25	21	82	26	0	122	69	13	12	31	95	62	26	32	25	24	27	33	33	41	18	0	0
OTU_213	Chordata	Actinopteri	Cypriniformes	Leuciscidae	Leuciscus	Leuciscus leuciscus	97.076	Midori2	GCGGTTAAACGAGAGGCCCTAGTTAATAATACACGGCGTAAAGGGTGGTTAAGGAAAGCACAATAATAAAGCCAAATGGCCCTTTGGCTGTCATACGCTTCTAGGTGTCCGAAGCCCAATATACGAAAGTAGCTTTAATTGACCCGCCTGACCCCACGAAAACTGAGAAA	108	145	241	191	61	55	195	176	222	129	215	186	476	248	151	247	108	271	181	140	0	60	149	88	195	159	89	246	69	55	236	161	196	256	57	67	118	97	0	0
OTU_214	Chordata	Actinopteri	Gobiiformes	Gobiidae	Neogobius		95	Midori2	CGGTTATACGAGAGGCCCAAGTTGACAAAAATCGGCAAAAGCGTGTAGTGATATCACCTCCACTAAAGCCAAACACCTTCAAGGCTGTAATACGCCCCCGAAGACGAACCCCAATCACAAAAATAGCTTTAATTTTCATGAAGCCACGAAAGCTAAAA	0	0	0	0	0	0	0	0	0	0	0	0	0	0	0	0	0	0	0	0	0	0	0	0	0	0	0	0	0	0	0	0	0	0	0	0	0	0	0	0
OTU_215	No Match	No Match	No Match	No Match	No Match	No Match	No Match	Midori2	TGGATCGATGTGAAGTCTAGAGACTTGGCCATTAGCCGAGGCCACACCGTGGTGGAGCCTGCCGTGGTGATGGCCACGCACTTAGACACTTTGATTCACCGCCACGCGAATGAATTGTTGGGCCGTCAAGAAACGCAAGAGTTGGTGGACCACTTCAAGGGCAGCTTCCC	0	0	0	0	0	0	0	0	0	0	0	0	0	0	0	0	0	0	0	0	936	0	0	0	0	2	0	0	0	0	0	0	0	0	0	0	0	0	0	0
OTU_216	Chordata	Aves	Passeriformes	Sylviidae	Sylvia	Sylvia atricapilla	100	Midori2	GCGGTCAGACAGGAGACCCAAATCAACATTATAACGGCGTAAAGTGTGGTAACATGCTATCCAAGTAACTAAGATTAAAAGACATCTGAGTTGTCATAAGCCAAAGATGTCCATAAGGCCACTATTCAAAGAAAATCTTAGACTAACGATTAATTGAAATCCACGAAAGCCAGGGCC	0	0	0	0	0	0	0	0	0	0	0	0	0	0	0	0	0	0	0	0	0	0	0	0	0	0	0	0	0	0	145	0	0	0	0	0	0	0	0	0
OTU_217	Chordata	Actinopteri	Cypriniformes	Leuciscidae	Alburnus	Alburnus alburnus	98.246	Midori2	GCGGTTAAACGAGGGGCCCTAGTTAATAATACGCGGCGTAAAGGTGGTTAAGGAAAGCATAACAATGAAGCCGAATGGCCCTTTGGCTGTCATACGCTTCTAGGTGTCCGAAGCCCAATATACGAAAGTAGCTTTAATAAGCCCCACCTGACCCCACGAAAGCTGAGGAA	0	0	55	19	8	61	22	10	1	0	43	17	14	0	0	12	41	8	0	12	67	0	44	0	0	0	1	0	0	27	3	4	13	0	22	10	16	53	0	0
OTU_218	Chordata	Actinopteri	Cypriniformes	Leuciscidae			91.279	Midori2	GCGGTTAAACGAGAGGCCCCAGTTAATAATACACGGCGTAAAGTATTAACAATAAAGCCGAATGGCCCTTTGGCTGTCATACGCTTCTAGGTGTCCGAAGTTCAACATACGAAAGTAGCTTTAATAACGCCCACCTGACCCCACGAAAGCTGAGAAA	0	0	0	0	0	0	0	0	0	0	0	0	0	0	0	0	0	0	0	0	0	0	0	0	0	0	0	0	0	0	0	0	0	0	0	0	0	0	0	0
OTU_219	Chordata	Actinopteri	Perciformes	Percidae	Sander		96.97	Midori2	GCGGTTATACGAGAGGCCCAAGTTGATAGACAGCGTAAAGCGTGGTTAAGACAAAAACAAAACTAAAGCCGAACACCTTCAGAGCTGTTATACGCACCCGAAGGTAAGAAGTTCAACCACGAAAGTGGCTTTATAGCCCCTGAACCCACGAAAGCTACGATA	11	12	4	8	0	2	2	6	6	6	4	3	1	0	1	6	10	18	6	5	2	0	1	6	0	3	11	7	1	5	7	2	14	2	3	4	3	1	0	0
OTU_220	Chordata	Actinopteri	Gobiiformes	Gobiidae	Neogobius		96.988	Midori2	GCGGTTATACGAAGCCCAAGTTGACAAAAATCGGCGAAAAGCGTGGTTAGTGATATCACCTCCACTAAAGCCAAACACCTTCAAGGCTGTAATACGCCCCCGAAGACAGGAAGCCCAATCAAAAGTAGCTTTAATTTTCATGAAGCCACGAAAGCTAGGAAA	1	0	2	0	1	0	0	0	0	0	0	0	0	0	1	0	0	0	0	0	0	5	0	0	0	0	0	0	0	0	0	0	1	0	0	0	1	0	0	0
OTU_221	Chordata	Actinopteri	Cypriniformes	Acheilognathidae	Rhodeus	Rhodeus sericeus	100	Midori2	GCGGTTAAACGAGAGGCCCCAGTTGACAGTACTGCGGCGTAAAGGGTGGTTAAAGCCTGCAACTTAATAAAGCTAAATAGTCCCCCGGCCGTCATACGCTTCTAGGCGCTAGAAACCCAATATACGAAAGTAGCTTTAGCATCACCGCCTGACCCCACGAAAGCTGAGGAA	0	0	0	0	0	0	0	0	0	0	0	0	0	0	0	0	0	0	0	0	0	0	0	0	0	0	0	0	0	0	0	0	0	0	0	0	0	0	0	0
OTU_222	Chordata	Actinopteri	Gobiiformes	Gobiidae	Neogobius	Neogobius melanostomus	97.516	Midori2	GCGGTTATACGAGAGGCCCAATTTGACAAAAATCGGCGAAAACGTGGTTAGTGATATCACCTCCACTAAAGCCAAACACCTTCAAGGCTGTAATACGCCCCCGAATACAGCAAGCCCAATCACGAAAGTAGCTTTAATTTTCATGAAGCCACGAAAGCTAAAA	0	0	0	0	0	0	0	0	0	0	0	0	0	0	0	0	0	0	0	0	0	0	0	0	0	0	0	0	0	0	0	0	0	0	0	0	0	0	0	0
OTU_223	Chordata	Actinopteri	Cypriniformes				95.266	Midori2	GCGGTTAGACGAGAGGCCCTAGTTGATATTACAACGGCGTAAAGGGTGGTTAAGGATAAACAAAAATAAAGTCAAATGGCCGTCATACGCTTCTAGGAGTCCGAAGCCCTAATACGAAAGTAACTTTAATAAACCCACCTGACCCCACGAAAGCTGAGAAA	0	0	0	0	0	0	0	0	0	0	0	0	0	0	1	0	0	0	0	0	0	0	0	0	0	0	0	0	0	0	0	0	0	0	0	0	0	0	0	0
OTU_224	Chordata	Aves	Columbiformes	Columbidae	Columba	Columba livia	100	Midori2	GCGGTCACACAAGAGACCCAAGCTAATCGTTTGCGGCGTAAAGAGTGGACTCATGCTTATCACACTAATTAAGGTCAAAACGCAACTGAGCTGTCATAAGCCTAAGATGCATTTAAAACCGCCCTAAAGATGACCCTAAATTCACAAGACTTAATGAACTCCACGAAAGCCAGGGCA	0	0	0	0	0	0	0	0	0	0	0	0	0	0	0	0	0	0	0	0	0	0	0	0	0	0	0	0	0	0	0	0	0	0	0	0	1	0	0	0
OTU_225	Chordata	Actinopteri	Cypriniformes	Leuciscidae	Leuciscus	Leuciscus leuciscus	97.076	Midori2	GCGGTTAAACGAGAGGCCCTAGTTAATAATACACGGCGTAAAGGGTGGTTAAGGAGAGCATAACAATAAAGCCGAATGGCCCTTTGGCTGTCATACGCTTCTAGGTGTCCGAAGTTCAACATACGAAAGTAACTTTAATAAACCCACCTGACCCCACGAAAGCTGAGAAA	13	17	42	74	62	25	84	35	68	35	38	81	270	152	380	242	115	87	133	108	16	10	6	6	3	51	24	54	19	4	65	50	103	114	9	21	40	9	0	0
OTU_226	Chordata	Actinopteri	Cypriniformes	Leuciscidae	Leuciscus		96.512	Midori2	GCGGTTAAACGAGAGGCCCCAGTTAATAATACACGGCGTAAAGGGTGGTTAAGGAAAGTATTAACAATAAAGCCGAATGGCCCTTCTGTCATACGCTTCTAGGTGTCCGAAGCCCAATATACGAAAGTAGCTTTAATAAAGCCCACCTGACCCCACGAAAGCTGAGAAA	107	121	106	112	90	73	70	146	94	195	151	136	143	125	171	189	109	183	164	176	97	134	83	60	95	128	155	85	66	59	170	129	263	204	74	60	84	114	0	0
OTU_227	Chordata	Actinopteri	Cypriniformes				96.45	Midori2	GCGGTTAGACGAGAGGCCCTAGTTGATATTACAACGGCGTAAAGGGTGGTTAAGGATAAACAAAAATAAAGTCAAATGGCCCCTTGGCCGTCATACGCTTCTAGGAGTCCGAAGCCTAAAAGTAACTTTAATAAACCCACCTGACCCCACGAAAGCTGAGAAA	0	0	0	0	0	0	0	0	0	0	0	0	0	0	0	0	0	0	0	0	0	0	0	0	0	0	0	0	0	0	0	0	0	0	0	0	0	0	0	0
OTU_228	Chordata	Hyperoartia	Petromyzontiformes	Petromyzontidae	Lampetra	Lampetra fluviatilis/planeri	100	manual check	GCGGTTATACGAGGAGCTCAAGCTGATATCTCCGGCACAAAGCGTGATTAAAATACTAGCTTAACTAATACTATAGAAGCCATCATGCCTGCTAGTTGAATAGGTATGCTTAAATATCTCAACATCGAAAGAATCTATATTAATAAACTCACTTTGACATCACGAAAGCAAAACTCA	0	0	0	0	0	0	0	0	0	292	0	0	0	0	0	0	0	0	0	0	0	0	0	0	0	0	0	265	0	0	0	0	0	0	4	0	0	0	0	0
OTU_229	Chordata	Actinopteri	Perciformes	Percidae	Perca	Perca fluviatilis	98.125	Midori2	GCGGTTATACGAGAGGCCCAAGTTGATAGACATCGGCGTAAAGCGTGGTTAAGATTAAAGACAATACTAAAGCCGAACACCTTCAGAGCTATACGCATCCGAAGGTAAGAAGTTCAACCACGAAAGTGGCTTTATAGCCCCTGAACCCACGAAAGCTGAGAAA	6	10	10	4	3	2	2	4	5	5	2	6	18	15	6	7	12	3	9	3	3	3	1	12	14	5	9	2	3	2	16	9	13	10	4	5	5	2	0	0
OTU_230	Chordata	Actinopteri	Gobiiformes	Gobiidae	Neogobius		95.783	Midori2	GCGGTTATACGAGAGGCCCAAGTTGACAAAAATCGGCGAAAAGCGTGGTTAGTGATATCACCTCCACTAAAGCCAAACACCTTCAAGGCTGTAATACGCTTTTGAAGACAGGAAGTTTAATCACGAAAGTAGCTTTAATTTTCATGAAGCCACGAAAGCTAGGAAA	0	0	0	0	0	0	0	0	0	0	0	0	0	0	0	802	0	0	0	0	0	0	0	0	0	0	0	0	0	0	0	0	0	0	0	0	0	0	0	0
OTU_231	Chordata	Mammalia	Artiodactyla	Suidae	Sus	Sus scrofa	98.16	Midori2	GCGTCATACGATTAACCCAAATTAATAGATCCACGGCGTAAAGAGTGTTTAAGaaaaaaaaaCCACAATAGAGTTAAATTATAACTAAGCTGTAAAAAGCCCTAGTTAAAATAAAATAACCCACGAAAGTGACTCTAATAATCCTTACACATATAGCTAGGACC	0	0	0	0	0	0	0	0	0	0	0	0	0	0	0	0	0	0	0	0	0	0	0	0	0	0	0	0	0	0	0	0	0	0	0	0	0	0	0	0
OTU_232	Chordata	Actinopteri	Gobiiformes	Gobiidae	Neogobius		96.386	Midori2	GCGGTTATACCTGCCAGCCAAGTTGACAAAAATCGGCGAAAAGCGTGGTTAGTGATATCACCTCCACTAAAGCCAAACACCTTCAAGGCTGTAATACGCCCCCGAAGACAGGAAGCCCAATCACGAAAGTAGCTTTAATTTTCATGAAGCCACGAAAGCTAGGAAA	0	0	0	0	0	0	0	0	0	1	0	1	0	0	0	0	0	0	0	0	0	0	0	0	0	0	0	1	0	0	0	0	0	0	1	0	0	0	0	0
OTU_233	Chordata	Actinopteri	Perciformes	Percidae	Perca	Perca fluviatilis	97.561	Midori2	GCGGTTATACGAGAGGCCCAAGTTGATAGACATCGGCGTAAAGCGTGGTTAAGATTAAAGATAATACTAAAGCCGAACACCTTCAGAGCTGTTATACGCATCCGAAGGTAAGAAGTTTAACTACGAAAGTGGCTTTATAGCCCCTGAACCCACGAAAGCTAGGAAA	0	3	0	0	0	2	1	0	0	1	1	0	2	0	0	0	0	2	3	0	0	0	2	1	1	1	0	0	1	0	0	0	0	1	1	0	0	0	0	0
OTU_234	Chordata	Actinopteri	Perciformes	Percidae			93.373	Midori2	GCGGTTATACGAGAGGCCCAAGTTGATAGACATCGGCGTAAAGCGTGGTTAGTGATATCACCTCCACTAAAGCCGAACACCTTCAGAGCTGTTATACGCATCCGAAGGTAAGAAGTTCAACCACGAAAGTGGCTTTATAGCCCCTGAACCCACGAAAGCTACGATA	6	2	1	6	0	1	2	0	0	0	1	3	3	2	1	7	5	1	2	1	0	0	1	0	5	1	2	2	1	1	0	4	0	1	2	1	2	0	0	0
OTU_235	Chordata	Actinopteri	Cypriniformes	Leuciscidae	Leuciscus	Leuciscus leuciscus	98.182	Midori2	GCGGTTAAACGAGAGGCCCTAGTTAATAATACACGGCGTAAAGGGTGGTTAAGGAGAGCATAACAAAAAGCCGAATGGCCCTTTGGCTGTCATACGCTTCTAGGTGTCCGAAGCCCAATATAAAAGTAGCTTTAATAAAGCCCACCTGACCCCACGAAAGCTACGATA	11	0	0	6	0	1	1	0	3	0	0	9	0	5	6	10	4	1	1	3	0	0	0	0	0	0	0	0	0	0	1	0	0	7	0	0	7	0	0	0
OTU_236	Chordata	Aves	Passeriformes	Fringillidae	Fringilla	Fringilla coelebs	99.438	Midori2	GCGGTCATACAGGAGACCCAAATTAACATTATAACGGCGTAAAGCGTGGTCACATGTTATCAAGTAACTAAGACTAAAAAGCAACTGAGTTGTCACAAGCCCAAGATGCCAATAAGGCCACCTCCTTAAAGAAGGTCTTAGAACAACGATTAATTGAACTCCACGAAAGCCAGGACC	0	0	0	0	0	0	0	0	0	0	0	0	0	0	0	0	0	0	0	0	0	0	0	0	0	0	0	0	0	0	0	0	0	0	0	0	0	0	0	0
OTU_237	Chordata	Actinopteri	Perciformes	Percidae	Perca		96.988	Midori2	GCGGTTATACAGGCCCAAGTTGATAGACATCGGCGTAAAGCGTGGTTAAGATTAAAGACAATAAAAGCCGAACACCTTCAGAGCTGTTATACGCATCCGAAGGTAAGAAGTTCAACCACGAAAGTGGCTTTATAGCCCCTGAACCCACGAAAGCTACGATA	0	0	0	0	0	0	0	0	0	0	0	0	0	0	0	0	0	0	0	0	0	0	0	0	0	0	0	0	0	0	0	0	0	0	0	0	0	0	0	0
OTU_238	Chordata	Actinopteri	Cypriniformes				96.45	Midori2	GCGGTTAGACGAGAGGCCCTAGTTGATATTACAACGGCGTAAAGGGTGGTTAAGGATAAACAAAGTCAAATGGCCCCTTGGCCGTCATACGCTTCTAGGAGTCCGAAGCCCTAATACGAAAGTAACTTTAATAAACCCACCTGACCCCACGAAAGCTGAGAAA	2	1	2	0	0	0	1	2	0	0	0	0	0	3	0	1	0	0	0	0	1	0	0	0	0	0	0	0	0	0	0	0	0	1	0	0	0	0	1	0
OTU_239	Chordata	Actinopteri	Cypriniformes	Leuciscidae	Abramis	Abramis brama	98.193	Midori2	GCGGTTATACGAGAGGCCCAAGTTAATAATACACGGCGTAAAGGGTGGTTAAGGAAAGTATTAACAATAAAGCCGAATGGCCCTTTGGCTGTCATACGCTTCTAGGTGTCCGAAGTTCAACATACGAAAGTAGCTTTAATAACGCCCACCTGAACCCACGAAAGCTACGATA	480	541	536	530	736	756	524	721	558	512	573	526	496	534	775	988	744	523	605	665	308	352	551	696	703	526	1101	784	486	385	1141	893	1054	993	611	773	625	922	0	22
OTU_240	Chordata	Actinopteri	Gobiiformes	Gobiidae			93.373	Midori2	GCGGTTATACGAGAGGCCCAAGTTGACAAAAATCGGCGAAAAGCGTGGTTAAGATTAAAGACAATACTAAAGCCAAACACCTTCAAGGCTGTAATACGCCCCCGAAGACAGGAAGCCCAATCACGAAAGTAGCTTTAATTTTCATGAAGCCACGAAAGCTAGGAAA	137	169	61	90	51	63	107	75	80	58	60	127	109	131	127	158	147	105	96	52	12	43	97	55	95	92	120	127	124	131	102	97	158	125	109	127	48	75	0	0
OTU_241	Chordata	Mammalia	Carnivora	Canidae	Vulpes	Vulpes vulpes	100	Midori2	GCGGTCATACGATTAACCCGAACTAATAGGCCCACGGCGTAAAGCGTGTTTAAGATAACATATTACTAAAGTTAAAACTTAACTAAGCCGTAAAAAGCTACAGTTACCATAAAATATACTACGAAAGTGACTTTAAAATTTTCTGATTACACGATAGCTAAGACC	0	0	0	0	0	0	0	0	0	0	0	0	0	0	0	0	0	0	0	0	0	0	0	0	0	0	0	0	0	0	0	0	707	0	0	0	0	0	0	0
OTU_242	Chordata	Actinopteri	Perciformes	Percidae	Sander	Sander lucioperca	97.484	manual check	GCGGTTATACGAGAGGCCCAAGTTGACAAAAATCGGCGAAAAGCGTGGTTAAGACAAAAACAAAACTAAAGCCGAACACCTTCAGAGCTGTTATACGCACCCGAAGGTAAGAAGTTCAACCACGAAAGTGGCTTTATTACCCCTGAACCCACGAAAGCTGAGAAA	152	242	135	187	102	70	126	132	215	89	194	126	62	31	69	272	216	265	116	98	71	0	23	34	98	43	217	188	66	128	195	209	260	65	131	164	129	90	0	0
OTU_243	Chordata	Actinopteri	Perciformes	Percidae	Perca		96.386	Midori2	GCGGTTATACGAGAGGCCCAAGTTGACAAAAATCGGCGTAAAGCGTGGTTAAGATTAAAGACAATACTAAAGCCGAACACCTTCAGAGCTGTTATACGCACCCGAAGGTAAGAAGTTCAACCACGAAAGTGGCTTTATTACCCCTGAACCCACGAAAGCTACGATA	20	27	17	6	5	3	16	16	14	6	14	28	3	9	5	26	36	19	19	12	1	6	11	5	13	5	40	12	11	12	9	19	42	12	27	9	8	7	0	0
OTU_244	Chordata	Actinopteri	Cypriniformes	Cyprinidae			94.737	Midori2	GCGGTTAGACGAGAGGCCCTAGTTGATATTATAACGGCGTAAAGGGTGGTTAGGGATAAATAATAATAAAGCCAAGCCCCCCTTGGCCGTCATACGCTTCTAGGTGTCCGAGGCCCTATATACGAAAGTAGCTTTAATAACGCCCACCTGACCCCACGAAAGCTGAGAAA	75	69	228	169	76	76	199	296	106	71	177	87	152	110	159	229	101	142	164	165	0	79	362	476	216	119	262	407	135	118	402	177	147	196	110	88	115	224	0	0
OTU_245	Chordata	Mammalia	Rodentia	Castoridae			92.771	Midori2	ATGGTCATACGATAGACCCAAACTAATAAACCCCGGCATAAAGCGTGTTTAAGAATTTCTGATCCTCAATAAGAATAAACTTTACCTAGGCCTTAAAAAGCTATAGCTAAAGAAAAAATAACTTACGAAAGTAATCTTAACAAATCTGATAACACGACAGCTAAGACC	0	0	0	0	0	0	0	690	0	0	0	0	0	0	0	0	0	0	0	0	0	0	0	0	0	0	0	0	0	0	0	0	0	0	0	0	0	0	0	0
OTU_246	Chordata	Actinopteri	Cypriniformes	Leuciscidae	Abramis		95.93	Midori2	GCGGTTAAACGAGAGGCCCCAGTTAATAATACACGGCGTAAAGGGTGGTTAAGGAAAGTATTAACAATAAAGCCCCTTTGGCTGTCATACGCTTCTAGGTGTCCGAAGTTCAACATACGAAAGTAGCTTTAATAACGCCCACCTGACCCCACGAAAGCTGAGAAA	0	0	0	0	0	0	0	0	0	0	3	0	0	0	0	0	0	0	0	0	1	0	1	0	0	0	0	0	0	0	0	0	0	0	0	0	0	0	0	0
OTU_247	Chordata	Actinopteri	Cypriniformes	Leuciscidae	Squalius	Squalius cephalus	97.093	Midori2	GCGGTTATACGAGAGGCCCAAGTTAATAATACACGGCGTAAAGGGTGGTTAAGGAAAACATAACAATTAAAGCCGGATGGCCCTTTGGCTGTCATACGCTTCTAGGTGTCCGAAGCCCAATATACGAAAGTAGCTTTAATAAAGTCCACCTGACCCCACGAAAGCTGAGAAA	90	9	9	4	10	35	21	7	10	26	20	60	13	37	4	7	18	980	6	5	11	0	12	43	7	17	17	47	30	10	8	22	13	15	59	14	38	16	0	0
OTU_248	Chordata	Actinopteri	Cypriniformes	Leuciscidae	Abramis	Abramis brama	98.193	Midori2	GCGGTTAAACGAGAGGCCCCAGTTAATAATACACGGCGTAAAGGGTGGTTAAGGAAAGTATTAACAATAAAGCCGAATGGCCCTTTGGCTGTCATACGCTTCTAGGTGTCCGAAGTTCAACATACGAAAGTAACTTTAATAAACCCACCTGACCCCACGAAAGCTACGATA	80	119	170	206	240	222	182	257	162	178	178	331	229	295	388	268	305	207	277	245	43	25	57	73	123	129	197	194	166	105	328	174	309	285	101	138	129	113	0	6
OTU_249	Chordata	Actinopteri	Cypriniformes	Xenocyprididae	Ctenopharyngodon		96.532	Midori2	GCGGTTAAACGAGGGGCCCCAGTTGATAACACCACGGCGTAAAGGGTGGTTAAGGAAAGCAAAACAATAAAGCCAAATGGCCCTTTGGCCGTCATACGCTTCTAGGTGTCCGAAGTTCAACATACGAAAGTAGCTTTAATAACGCCCACCTGACCCCACGAAAGCTGAGAAA	0	0	111	0	0	0	0	190	0	0	0	0	20	0	0	0	0	0	0	0	0	0	0	0	0	0	0	0	0	0	0	0	0	0	0	0	0	0	0	0
OTU_250	Chordata	Actinopteri	Gobiiformes				89.091	Midori2	TCGGTTATACGAGAGGCCCAAGTTGACAAAAATCGGCGAAAAGCGTGGTTAGTGATATCATCTTTATTAAAGCTAAATACCTTCAAGGCTGTAATATGTTTTTGAAGATAGGAAGTTTAATTATGAAAGTAGCTTTAATTTTCATGAAGCCACGAAAGCTAGGAAA	0	0	0	0	0	0	0	0	0	0	0	0	0	0	0	0	0	0	0	0	0	0	0	0	0	0	0	0	0	0	0	0	0	0	0	0	0	0	0	0
OTU_251	Chordata	Actinopteri	Cypriniformes	Leuciscidae	Squalius	Squalius cephalus	97.076	Midori2	GCGGTTAAACGCAGGCCCTAGTTAATAATACACGGCTTAAAGGGTGGCTAAGGAAAACATAACAATAAAGCCGAATGGCCCTTTGGCTGTCATACGCTTCTAGGTGTCCGAAGCCCAATATACGAAAGTAGCTTTAATAAAGTCCACCTGACCCCACGAAAGCTGAGAAA	176	66	35	27	47	101	33	27	27	96	57	94	158	84	21	37	58	48	34	39	39	0	32	79	15	37	41	36	81	44	57	105	158	53	70	27	120	58	0	0
OTU_252	Chordata	Actinopteri	Gobiiformes	Gobiidae	Neogobius		96.386	Midori2	GCGGTTATACGAGAGGCCCAAGTTGACAAAAATCGGCGAAAAGCGTGGTTAGTGATATCACCTCCACTAAAGCCACCCAAGGCTGTAATACGCCCCCGAAGACAGGAAGCCCAATCACGAAAGTAGCTTTAATTTTCATGAAGCCACGAAAGCTAGGAAA	0	0	0	1	0	0	0	0	0	0	1	1	0	0	0	0	0	0	0	0	0	0	0	0	0	1	0	0	0	0	0	0	0	0	0	0	0	0	0	0
OTU_253	Chordata	Actinopteri	Cypriniformes	Leuciscidae	Leuciscus		95.906	Midori2	GCGGTTAAACGAGAGGCCCTAGTTAATAATACACGGCGTAAAGGGTGGTTAAGGATAAACAAAAATAAAGTCAAATGGCCCCTTGGCCGTCATACGCTTCTAGGTGTCCGAAGCCCAATATACGAAAGTAGCTTTAATAAAGCCCACCTGACCCCACGAAAGCTGAGAAA	5	4	7	6	4	13	4	9	3	17	10	22	21	26	16	28	10	8	18	14	1	0	2	1	5	5	5	5	7	1	19	17	27	26	8	4	11	5	0	0
OTU_254	Chordata	Actinopteri	Cypriniformes	Leuciscidae	Abramis		96.512	Midori2	GCGGTTAAACGAGAGGCCCCAGTTAATAATACACGGCGTAAAGGGTGGTTAAGGAAAGTTAACAATAAAGCCGAATGGCCCTTTGGCTGTCATACGCTTCTAGGTGTCCGAAGTTCATATACGAAAGTAGCTTTAATAACGCCCACCTGACCCCACGAAAGCTAGGAAA	0	0	0	1	0	0	0	0	0	0	0	0	0	0	0	1	0	0	0	1	0	0	0	2	1	0	1	0	0	0	0	0	0	0	1	0	0	0	0	0
OTU_255	Chordata	Actinopteri	Perciformes	Percidae	Sander		96.97	Midori2	GCGGTTATACGAGAGATCAAAGTTGATAGACATCGGCGTAAAGCGTGGTTAAGACAAAAACAAAACTAAAGCCGAACACCTTCAGAGCTGTTATACGCACCCGAAGGTAAGAAGTTCAACCACGAAAGTGGCTTTATAGCCCCTGAACCCACGAAAGCTACGATA	2	7	1	2	0	0	1	5	4	4	2	0	0	0	2	9	8	2	4	1	0	0	2	0	4	2	6	4	1	3	0	1	6	2	1	4	0	2	0	0
OTU_256	Chordata	Actinopteri	Cypriniformes	Leuciscidae	Leuciscus	Leuciscus leuciscus	98.246	Midori2	GCGGTTAAACGAGAGGCCCTAGTTAATAATACACGGCGTAAAGGGTGGTTAAGGAAAGCACAATAATAAAGCCAAATGGCCCTTTGGCTGTCATACGCTTCTAGGTGTCCGAAGCCCAATATACGAAAGTAGCTTTAATAAAGTCCACCTGACCCCAAAAGCTGAGAAA	513	571	687	321	589	7	5	198	367	356	1307	65	326	1117	79	230	8	691	152	50	3	2	1	3	483	18	290	68	464	5	524	236	1048	1778	5	141	531	70	0	0
OTU_257	Chordata	Actinopteri	Perciformes	Percidae	Sander	Sander lucioperca	98.742	manual check	GCGGTTATACGAGAGGCCCAAGTTGATAGACATCGGCGTAAAGCGTGGTTAAGACAAAAACAAAACTAAAGCCGAACACCTTCAGAGCTGTTATACGCACCCGAAGGTAAGAAGTTCAACCACGAAAGTGGCTTTATTACACCTGACCCCACGAAAGCTGAGAAA	26	72	32	62	20	7	27	60	39	39	58	42	19	14	13	60	66	73	81	42	33	0	6	8	24	15	62	71	9	32	74	42	87	18	36	24	15	23	0	0
OTU_258	Chordata	Actinopteri	Cypriniformes	Leuciscidae	Leuciscus	Leuciscus leuciscus	98.246	Midori2	GCGGTTAAACGAGAGGCCCTAGTTAATAATACACGGCGTAAAGGGTGGTTAAGGAAAGCACAATAATAAAGCAAAATGGCCCTTTGGCCGTCATACGCTTCTAGGTGTCCGAAGCCCAATATACGAAAGTATCTTTAATAAAGCCCACCTGACCCCACGAAAGCTGAGAAA	27	66	52	28	51	1	1	10	14	19	72	5	22	84	2	17	0	32	3	6	1	0	0	0	39	0	14	0	40	0	43	27	45	97	0	8	48	6	0	0
OTU_259	Chordata	Aves	Passeriformes	Sturnidae	Sturnus	Sturnus vulgaris	97.765	Midori2	GCGGTCATACAGGAGGCCCAAATTAACATTATAACGGCGTAAAGAGTGGTCACATGTTATCCAAGTAGCTAAGAAAAAAAGCAACTGAGCTGTCATAAGCCCAAGATGCCCATAAGGCCTCTTCCTCAAAGAAGATCTTAGAACAACGATCAATTGAAACCCACGAAAGCCAGGACC	0	0	0	1	0	0	0	0	0	0	0	0	0	0	0	0	0	0	0	0	0	0	0	0	1	0	0	0	0	0	0	0	0	0	0	0	0	0	0	0
OTU_260	Chordata	Actinopteri	Gobiiformes	Gobiidae	Neogobius	Neogobius melanostomus	98.101	Midori2	GCGTTATACGAGAGGCCCAATTTGACAAAAATCGGCGAAAAGCGTGGTTAGTGATATCACCTCCACTAAAGCCAAACACCTTCAAGGCTGTAATACGCCCCCGAAGACGAAGCCCAATCACGAAAGTAGCTTTAATTTTCATGAAGCCACGAAAGCTAAAA	0	0	0	0	0	0	0	0	0	0	0	0	0	0	0	0	0	0	0	0	0	0	0	0	0	0	0	0	0	0	0	0	0	0	0	0	0	0	0	0
OTU_261	Chordata	Actinopteri	Gobiiformes	Gobiidae	Neogobius	Neogobius melanostomus	98.171	Midori2	GCGGTTATACGAGAGGCCCAAGTTGACAAAAATCGGCGAAAAGCGTGGTTAGTGATATCACCTCCACTAAAGCCAAACACCTTCAAGGCTGTAATACGCCCCCGAAGACAGGAAGCCCAATCACGAAAGTAGCTTTAATTTTCATGAAGCCACAATAGCTAAGACC	13	24	20	18	14	17	62	12	24	33	28	23	8	21	14	44	11	33	32	24	25	46	51	43	44	38	30	19	20	20	26	18	28	25	20	18	9	24	0	11
OTU_262	Chordata	Aves	Apodiformes	Apodidae	Apus	Apus sp.	99.432	Midori2	GCGGTCACACAAGAAACCCAAATTAACCGTAATACGGCGTAAAGCGTGACATTATGCTATCCCTCTAACTATGATCAAAATACAACTAAGCTGTCATAAGCTCATGATGTACCCAAAATCAACCTGAAAACGATCCCAGCCCCAACGATCTATTAACCGTCACGAAAGCTAGAATA	0	0	0	0	0	0	0	0	0	0	0	0	0	0	0	0	0	0	0	0	0	0	0	0	0	0	0	0	0	0	0	0	0	0	0	0	0	0	0	0
OTU_263	Chordata	Actinopteri	Gobiiformes	Gobiidae	Neogobius	Neogobius melanostomus	98.137	Midori2	GCGGTTATACGAGATGCCCAAGTTGACAAAAATCCGCGAAAAGCGTGGTTAGTGATATCACCTCCACTAAAGCCAAACACCTTCAAGGCTGTAATACGCCCCCGAAGACAGGAAGCCCAATCACGAAAGTACTTTAATTTTCATGAAGCCACGAAAGCTAAAA	0	0	0	0	0	0	0	0	0	0	0	0	0	0	0	3	0	0	0	0	0	0	0	0	0	1	1	0	0	2	0	0	1	0	1	0	1	1	0	0
OTU_264	Chordata	Actinopteri	Cypriniformes	Leuciscidae	Abramis	Abramis brama	98.193	Midori2	GCGGTTAAACGAGAGGCCCCAGTTAATAATACACGGCGTAAAGGGTGGTTAAGGAAAGTATTAACAATAAAGCCAAATGGCCCTTTGGCTCATACGCTTCTAGGTGTCCGAAGTTCAACATACGAAAGTAGCTTTAATAACGCCCACCTGACCCCACGAAAGCTACGATA	3	6	4	3	4	237	2	0	3	5	4	0	2	1	5	5	11	0	53	1	3	3	3	10	9	3	4	4	2	2	7	2	4	3	0	4	4	103	0	3
OTU_265	Chordata	Actinopteri	Cypriniformes	Leuciscidae	Abramis	Abramis brama	97.59	Midori2	GCGGTTAAACGAGAGGCCCCAGTTAATACACGGCGTAAAGTGTGGTTAAGGAAAGTATTAACAATAAAGCCGAATGGCCCTTTGGCTGTCATACGCTTCTAGGTGTCCGAAGTTCAACATACGAAAGTAGCTTTAATAACGCCCACCTGACCCCACGAAAGCTACGATA	3	5	2	1	2	1	1	4	0	2	1	1	2	2	2	0	2	0	1	1	0	1	3	2	3	0	2	2	1	3	1	1	3	2	0	4	1	2	0	1
OTU_266	Chordata	Actinopteri	Cypriniformes	Leuciscidae			91.228	Midori2	GCGGTTAAACGAGAGGCCCTAGTTAATAATACACGGCGTAAAGGGTGGTTAAGGGAAGCACAATAATAAAGCCAAATGGCCCTTTGGCTGTCATACGCTTCTAGGTGCCCGAAAGTAGCTTTAATAAAGCCCACCTGACCCCACGAAAGCTGAGAAA	0	0	0	0	0	0	0	0	0	0	0	0	0	0	0	0	0	0	0	0	0	0	0	0	0	0	0	0	0	0	0	0	0	0	0	0	0	0	0	0
OTU_267	Chordata	Actinopteri	Perciformes	Percidae	Perca	Perca fluviatilis	100	Midori2	GCGGTTATACGAGAGGCCCAAGTTGATAGACATCGGCGTAAAGCGTGGTTAAGATTAAAGACAATACTAAAGCCGAACACCTTCAGAGCTGTTATACGCATCCGAAGGTAAGAAGTTCAACCACGAAAGTGGCTTTATAGCCCCTGAACCCACGAAAGCCAGGGCC	719	926	865	412	277	825	459	403	353	323	320	546	393	439	381	445	569	357	558	246	109	614	543	301	437	355	389	341	454	570	291	325	592	512	405	380	301	258	0	0
OTU_268	Chordata	Actinopteri	Cypriniformes	Cyprinidae	Cyprinus	Cyprinus carpio	97.647	manual check	GCGGTAGACGAGAGGCCCTAGTTGATATTACAACGGCGTAAAGGGTGGTTAAGGATAAACAAAAATAAAGTCAAATGGCCCCTTGGCCGTCATACGCTTCTAGGAGTCCGAAGCCCTAATACGAAAGTAGCTTTAATAACGCCCACCTGACCCCACGAAAGCTGAGAAA	158	266	341	424	341	315	395	462	337	403	313	582	773	778	728	621	615	566	496	468	55	0	65	74	206	310	301	221	266	156	598	349	605	618	181	245	219	158	1	0
OTU_269	Chordata	Actinopteri	Cypriniformes	Leuciscidae	Leuciscus		95.906	Midori2	CGGTTAAACGACCCCCCAGTTAATAATACACGGCGTAAAGGGTGGTTAAGGAAAGTATTAACAATAAAGCCGAATGGCCCTTTGGCTGTCATACGCTTCTAGGTGTCCGAAGCCCAATATACGAAAGTAGCTTTAATAAAGCCCACCTGACCCCACGAAAGCTGAGAAA	28	36	46	41	30	28	20	35	45	62	87	58	60	63	65	100	32	189	67	70	40	28	33	20	19	30	78	34	19	18	65	45	95	67	26	20	26	37	0	0
OTU_270	Chordata	Actinopteri	Cypriniformes	Leuciscidae	Rutilus	Rutilus rutilus	97.661	Midori2	GCGGTTAAACGAGAGGCCCCAGTTAATAATACACGGCGTAAAGGGTGGTTAAGGGAAGCACAACAATAAAGCCAAATGGCCCTTTGGCTGTCATACGCTTAGGTGTCCGAAGCCCAATATACGAAAGTAGCTTTAATAAAGCCCACCTGACCCCACGAAAGCTGAGAAA	5	16	11	11	2	8	7	33	8	9	5	4	33	9	8	9	10	26	33	3	0	15	5	3	11	53	20	26	1	13	28	2	20	5	2	227	381	24	0	0
OTU_271	Chordata	Actinopteri	Cypriniformes	Leuciscidae	Rutilus	Rutilus rutilus	98.81	Midori2	CCTGTTAAACGAGAGGCCCTAGTTAATAATACACGGCGTAAAGGGTGGTTAAGGGAAGCACAATAATAAAGCCAAATGGCCCTTTGGCTGTCATACGCTTCTAGGTGTCCGAAGCCCAATATACGAAATTAGCTTTAATAAAGTCCACCTGACCCCACGAAAGCTGAGAAA	616	708	147	125	47	313	272	501	289	780	402	802	669	767	170	334	495	747	344	265	2	69	110	110	170	1570	165	277	148	147	297	157	592	406	192	202	458	188	0	0
OTU_272	Chordata	Actinopteri	Cypriniformes	Leuciscidae	Rutilus	Rutilus rutilus	97.661	Midori2	GCGGTTAAACGAGAGGCCCCAGTTAATAATACACGGCGTAAAGGGTGGTTAAGGGGAGCACAATAATAAAGCCAAATGGCCCTTTGGCTGTCATACGCTTCTAGGTGTCCGAAGCCCAATATACGAAAGTAACTTTAATAAACCCACCTGACCCCACGAAAGCTGAGAAA	38	78	45	62	67	38	85	80	142	180	92	283	220	167	108	129	225	170	104	90	57	1	7	3	47	56	17	35	24	52	76	71	98	116	47	81	76	16	0	0
OTU_273	Chordata	Actinopteri	Cypriniformes	Leuciscidae	Abramis	Abramis brama	98.193	Midori2	GCGGTTAAACGAGAGGCCCCAGTTAATAATACATGCGTAAAGGGTGATTAAGGAAAGTATTAACAATAAAGCCGAATGGCCCTTTGGCTGTCATACGCTTCTAGGTGTCCGAAGTTCAACATACGAAAGTAGCTTTAATAACGCCCACCTGACCCCACGAAAGCTACGATA	0	5	0	0	2	3	0	0	0	0	1	8	0	0	3	1	0	3	1	0	3	1	1	0	2	1	0	4	0	2	1	3	41	1	1	1	0	2	0	5
OTU_274	Chordata	Actinopteri	Gobiiformes	Gobiidae	Neogobius		96.386	Midori2	GCGGTTATACGAGAGGCCCAAGTTGACAAAAATCCGAAAAGCGTGGTTAGTGATATCACCTCCACTAAAGCCAAACACCTTCAAGGCTGTAATACGCCCCCGAAGACAGGAAGCCCAATCACGAAAGTAGCTTTAATTTTCAAAGCCAAAAGCTAGGAAA	0	0	0	0	0	0	0	0	0	0	0	0	0	0	0	0	0	0	0	0	0	0	0	0	0	0	0	0	0	0	0	0	0	0	0	0	0	0	0	0
OTU_275	Chordata	Aves	Passeriformes	Corvidae	Corvus	Corvus corone	99.435	manual check	GCGGTCATACAGGAGACTCAAATTAACAGTATAACGGCGTAAAGGGTGGTAACATGCTATCTAATAACTAAGATTAAAAAGCAACTGAGATGTAATAATCCCAAGATGCTCATAAGGCCAACTATCAAAGAAGATCTTAGACTAACGATTAATTGAAATCCACGAAAGCCAGGGCC	0	0	0	0	0	0	0	0	0	0	0	0	0	0	0	0	0	0	0	0	0	0	0	0	0	0	0	2054	0	0	0	0	0	0	0	0	0	0	0	0
OTU_276	Chordata	Aves	Passeriformes	Passeridae	Passer	Passer domesticus/montanus	98.876	Midori2	GCGGTCATACAGGAGACCCAAATTAACATTATAACGGCGTAAAGCGTGGTTACATGTTATCCAAGTAACTAAGATTAAAAAGCAACTGAGCCGTCATAAGCCCAAGATGCCAATAAGGCCCCCTTATTAAAGAAGATCTTAGGACAACGATTAATTGACCCCACGAAAGCCAGGGCC	0	23	0	0	0	0	0	0	0	0	0	0	0	0	0	0	0	0	0	0	0	0	0	0	0	0	120	30	0	0	0	0	0	0	0	0	0	0	0	0
OTU_277	Chordata	Aves	Passeriformes	Fringillidae			97.753	Midori2	GCGGTCATACAGGAGACCCAAATTAACATTATAACGGCGTAAAGAGTGGTCACATGCTATCCAAGTAACTAAGATTAAAAAGCAACTAGCTGTCACAAGCCCAAGATGCTGATAAGGCCTCCTCATCAAAGAAGATCTTAGGACAACGATTGATTGAACTCCACGAAAGCCAGGTCC	0	0	0	0	0	0	0	0	0	0	0	0	0	0	0	0	0	0	0	0	0	0	0	0	0	0	0	1	0	0	0	0	0	0	0	0	0	0	0	0
OTU_278	Chordata	Actinopteri	Cypriniformes				95.266	Midori2	GCGGTTAAACGAGAGGCCCTAGTTAATAATACACGGCGTAAAGGGTGGTTAAGGATAAAAATAAAGTCAAATGGCCCCTTGGCCGTCATACGCTTCTAGGAGTCCGAAGCCCTAATACGAAAGTAACTTTAATAAACCCACCTGACCCCACGAAAGCTGAGAAA	166	353	212	278	176	266	276	300	210	466	288	716	789	747	543	496	476	568	479	354	22	0	59	46	98	210	183	182	178	101	382	275	653	420	129	170	164	97	0	0
OTU_279	Chordata	Actinopteri	Gobiiformes	Gobiidae	Neogobius	Neogobius melanostomus	98.16	Midori2	TCGGTTATACGAGAGGCCCAAGTTGACAAAAATCGGCGAAAAGCGTGGTTAGTGATATCACCTCCACTAAAGCCAAACACCTTCAAGGCTGTAATACGCCCCCGAAGACATGTAGCCCAATCACGAAAGTAGCTTTAATTTTCATGAAGCCACGAAAGCTACGATA	12	23	6	11	6	1	9	4	10	5	11	6	11	12	8	5	10	12	14	11	0	9	3	7	5	4	14	10	3	3	6	11	17	4	6	11	3	2	0	0
OTU_280	Chordata	Actinopteri	Perciformes	Gasterosteidae	Gasterosteus	Gasterosteus aculeatus	99.383	Midori2	GCGGTATACGAGAGGCCCAAGTTGATGAATTACGGCGTAAAGAGTGGTTAAGCTAAAATTAAAACTAAAGCCGAACACCCCCAAAGCTGTTATACGCATCCGGAGGTGAGAAGTTCAACCACGAAGGTGGCTTTATCTAACCTGAACCCACGAAAGCTACGATA	14	11	28	9	18	9	3	6	6	5	8	6	29	8	13	24	7	12	12	13	0	20	44	19	9	11	23	11	21	5	10	10	27	17	17	14	25	45	19	0
OTU_281	Chordata	Actinopteri	Gobiiformes	Gobiidae	Neogobius	Neogobius melanostomus	97.561	Midori2	GCGGTTATACGAGAGGCCCAAGTTGACAAAAAATCGCGAAAAGCGTGGTTAGTGATATCACCTCCACTAAAGCCAAACACCTTCAAGGCTGTAATACGCCCCCGAAGACAGGAAGCCCAATCACGAAAGTAGCTTTAATTTTCATGAAGCCACGAAAGCTACGATA	14	23	15	9	2	5	9	5	12	6	11	17	7	8	17	13	15	14	11	10	1	2	6	4	11	1	8	10	4	7	8	7	18	7	5	11	6	8	0	1
OTU_282	Chordata	Actinopteri	Cypriniformes	Cyprinidae	Cyprinus	Cyprinus carpio	98.182	manual check	GCGGTTAGACGAGAGGCCCTAGTTGATATTACAACGGCGTAAAGGGTGGTTAAGGATAAACAAAAATAAAGTCAAATGGCCCCTTGGCCGTCATACGCTTCTAGGAGTCCGAAGCCCTAATACGAAATTCCAACTTTAATAAACCCACCTGACCCCACGAAAGCTACGATA	3	9	7	4	2	3	2	4	2	4	2	4	4	6	3	6	9	19	5	1	0	0	1	1	2	0	4	3	0	1	3	5	4	6	2	1	3	1	0	0
OTU_283	Chordata	Actinopteri	Gobiiformes	Gobiidae	Neogobius	Neogobius melanostomus	97.561	Midori2	GCGGTTATACGAGCCCAAGTTGACAAAAATCGGCGAAAAGCGTGGTTAGTGATATCACCTCCACTAAAGCCAAACACCTTCAAGGCTGTAATACGCCCCCGAAGACAGGAAGCCCAATCACGAAAGTAGCTTTAATTTTCATGAAGCCACGAAAGCTACGATA	28	39	12	8	3	5	18	16	8	5	13	16	20	16	12	17	22	17	20	12	1	8	11	3	21	9	22	9	8	12	12	9	16	18	19	16	7	8	0	1
OTU_284	Chordata	Actinopteri	Cypriniformes	Leuciscidae	Abramis		96.512	Midori2	GCGGTTAAACGAGAGGCCCTAGTTAATAATACACGGCGTAAAGGGTGGTTAAGGAAAGTATTAACAATAAAGCCGAATGGCCCCCCCTGTCATACGCTTCTAGGTGTCCGAAGTTCAACATACGAAAGTAGCTTTAATAACGCCCACCTGACCCCACGAAAGCTGAGAAA	27	38	25	39	25	37	107	26	31	48	42	73	94	43	41	73	52	71	49	49	28	33	29	27	40	33	55	45	18	19	53	32	92	64	106	27	21	28	0	4
OTU_285	Chordata	Mammalia	Rodentia	Cricetidae	Microtus		96.951	Midori2	GCGGTTATACGAGAGGCCCAAACTAATTATTCTCGGCGTAAAACGTGTTACTAGAAATATGCAAAATAGAATTAAAATCCATCCAATATGTGAAAATTCATCGCTGGACCTAAAACCAATGACGAAAGTAATTCTAATAAGCCTGATACACGATAGCTAAGGTA	0	0	0	0	2	4	0	9	16	30	12	0	0	0	0	2	0	1	6	3	0	0	0	0	0	0	0	0	0	0	2	0	0	0	0	0	0	0	0	0
OTU_286	Chordata	Actinopteri	Cypriniformes	Leuciscidae	Rutilus	Rutilus rutilus	97.661	Midori2	GCGGTTAAACGAGAGGCCCTAGTTAATAATACACGGCGTAAAGGGTGGTTAAGGGAAGCACAATAATAAAGCCAAATGGCCCTTTGGCTGTCATACGCTTCTAGGTGTCCGAAGCCCGTTATACGAAAGTAGCTTTAACAACGCCCACCTGACCCCACGAAAGCTGAGAAA	38	60	20	21	9	3	7	10	6	11	24	70	16	5	3	10	8	98	7	9	1	54	4	3	7	10	25	6	21	3	47	7	62	34	3	8	13	6	0	0
OTU_287	Chordata	Actinopteri	Gobiiformes	Gobiidae	Neogobius		96.988	Midori2	GCTGTTATACGAGAGGCCCAAGTTGACAAAAATCGCGAAAACGTGGTTAGTGATATCACCTCCACTAAAGCCAAACACCTTCAACCTGTAATACGCCCCCGAAGACAGGAAGCCCAATCACGAAAGTAGCTTTAATTTTCATGAAGCCACGAAAGCTAGGAAA	0	0	0	0	0	0	0	0	0	0	0	0	0	0	0	0	0	0	0	0	0	0	0	0	0	0	0	0	0	0	0	0	0	0	0	0	0	0	0	0
OTU_288	Chordata	Actinopteri	Gobiiformes	Gobiidae	Neogobius		95.783	Midori2	GCGGTTATACGAGAGGCCCAAGTTGACAAAAATCGGCGAAAAGCGTGGTTAGTGATATTATCTCCACTAAAGCCAAACACCTTCAAGGCTGTAATACGCCCCCGAAGACAGGAAGTTTAATTATGAAAGTAGCTTTAATTTTCATGAAGCCACGAAAGCTAGGAAA	0	0	0	0	0	0	0	0	0	0	0	0	0	0	0	0	0	0	0	0	0	0	0	0	0	0	0	0	0	0	0	0	0	0	0	0	0	0	0	0
OTU_289	Chordata	Actinopteri	Gobiiformes	Gobiidae	Neogobius		96.988	Midori2	GCGGTTATACGAGAGGCCCAAGTTGACAAAAATCGGCGAAAAGCGTGGTTAGTGATATCACCTCCACTAAAGCCAAACACCTTCAAGGCTGTAATACGCCCCCGAAGACAGGAAGCCCAATCACGAAAGTAGCTTTAATTTTCAAGCCACGAAAGCTGAGAAA	50	62	68	73	70	69	42	52	62	89	76	86	82	107	90	89	70	80	90	66	41	51	51	55	53	74	112	81	51	47	121	70	105	94	45	64	47	66	0	7
OTU_290	Chordata	Actinopteri	Gobiiformes	Gobiidae	Neogobius		96.988	Midori2	GCGGTTATACGAGAGCCCAAGTTGACAAAAATCGGCGAAAAGCGTGGTTAGTGATATCACCTCCACTAAAGCCAAACACCTTCAAGGCTGTAATACGCCCGAAGACAGGAAGCCCAATCACGAAAGTAGCTTTAATTTTCATGAAGCCACGAAAGCTGAGAAA	13	3	3	5	3	14	3	1	3	6	2	4	0	1	4	3	2	6	3	0	3	19	2	4	4	2	6	4	1	3	3	1	5	5	1	6	2	1	0	0
OTU_291	Chordata	Actinopteri	Anguilliformes	Anguillidae			94.611	Midori2	GCGGTTATACGAGGGGCTCAAATTGATATTACACGGCGTAAAGCGTGATTAAAAAACTAAAGCCAAACACTTCCCAAGCTGTCATACGCTACCGGAACATAATCGAAGCCCTATAACGAAAGTAGCTTTAACACCTTTGAACTCACGACAGTTGAGGAA	0	0	0	0	0	0	0	0	0	0	0	0	0	0	1	0	0	0	0	0	0	0	0	0	0	0	0	0	0	0	0	1	0	0	0	0	0	0	0	0
OTU_292	Chordata	Mammalia	Rodentia	Cricetidae	Microtus	Microtus agrestis	99.39	Midori2	GCGGTCATACGATTAACCCAAATTAATTATTCTCGGCGTAAAACGTGTTACTAGAAACATACAAAATAGAATTAAAACCCATCCAATATGTAAAAATTCATCGCTGGACCTAAAACCAATGACGAAAGTAATTCTAACTAACATGATACACGATAGCTAAGATC	0	0	0	0	0	0	0	0	0	0	0	0	0	0	0	0	0	0	0	0	0	0	0	0	0	0	0	0	0	0	0	0	0	0	0	0	0	0	0	0
OTU_293	Chordata	Actinopteri	Cypriniformes	Leuciscidae	Rutilus	Rutilus rutilus	97.674	Midori2	GCGGTTAAACGAGGGGCCCTAGTTAATAATACACGGCGTAAAGGGTGGTTAAGGGGAGCACAATAATAAAAGCCAAATGGCCCTTTGGCTGTCATACGCTTCTAGGTGTCCGAAGCCCAATATACGAAAGTAGCTTTAATAAAGTCCACCTGACCCCACGAAAGCTGAGAAA	4	13	2	1934	248	43	93	26	245	405	158	355	74	20	5	44	497	180	10	28	381	1	4	1	15	12	16	6	0	122	6	220	6	78	220	150	56	2	0	0
OTU_294	Chordata	Actinopteri	Cypriniformes	Cyprinidae			95.266	Midori2	GCGGTTAGACGAGAGGCCCTAGTTGATATTATAACGGCGTAAAAGGTTGGGATAAATAATAATAAAGCCAAATGGCCCCTTGGCCGTCATACGCTTCTAGGTGTCCGAGGCCCTATATACGAAAGTAGCTTTAATTAACCCGCCTGACCCCACGAAAACTGAAAA	0	0	0	0	0	0	0	0	0	0	0	0	0	0	0	0	0	0	0	0	0	0	0	0	0	0	0	0	0	0	0	0	0	0	0	0	0	0	0	0
OTU_295	Chordata	Actinopteri	Cypriniformes	Leuciscidae	Squalius	Squalius cephalus	97.076	Midori2	GCGGTTAAACGAGAGGCCCTAGTTAATAATACACGGCGTAAAGGGTGGTTAAGGAAAACATAACAATAAAGCCGAATTGCCCTTTGCCTGTCATACGCTTCTAGGTGTCCGAAGCCCAATATACAAAGTAGCTTTAATATAGTCCACCTGACCCCACGAAAGCTGAGAAA	1	0	0	3	3	6	2	2	0	3	4	2	0	4	2	1	3	2	2	2	3	0	4	3	0	4	4	2	2	1	4	1	6	0	1	1	4	2	0	0
OTU_296	Chordata	Actinopteri	Cypriniformes	Leuciscidae	Rutilus	Rutilus rutilus	97.661	Midori2	GCGGTTAAACGAGAGGCCCTAGTTAATAATACACGGCGTAAAGGGTGGTTAAGGGAAGCAATAATAAAGCCAAATGGCCCTTTGGCTGTCATACCTTCTAGGTGTCCGAAGCCCAATATACGAAAGTAGCTTTAATAAGGCCCACCTGACCCCACGAAAGCTGAGAAA	12	24	44	24	1	13	18	48	17	33	14	18	45	4	12	10	20	23	111	7	1	11	4	6	18	103	19	29	1	35	102	1	26	7	5	24	132	38	0	0
OTU_297	Chordata	Mammalia	Artiodactyla	Suidae	Sus	Sus scrofa	98.193	Midori2	GCGGTCATACGATTAATCCAAATTAATAGATCCACGGCGTAAAGAGTGTTTAAGaaaaaaaaaCCACAATAGAGTTAAATTATAACTATCTGTAAAAAGCCCTAGTTAAAATAAAATAACCCACGAAAGTGACTCTAATAATCCTGACACACGATAGCTAGGACC	0	0	0	0	0	0	2	0	0	0	0	0	0	0	0	0	0	0	0	0	0	0	0	0	0	0	0	0	0	0	0	0	0	0	0	0	0	0	0	0
OTU_298	Chordata	Actinopteri	Cypriniformes	Leuciscidae	Squalius		95.954	Midori2	GCGGTTAAACGAGAGGCCCTAGTTGATTTTATCACGGCGTAAAGGGTGGTTAAGGAAAACATAACAATTAAAGCCGGATGGCCCTTTGGCTGTCATACGCTTCTAGGTGTCCGAAGCCCAATATACGAAAGTAGCTTTAATAAAGTCCACCTGACCCCACGAAAGCTGAGAAA	15	5	5	8	3	0	1	0	5	14	35	13	3	1	0	1	18	8641	1	6	0	0	10	6	0	0	0	10	4	18	17	5	0	4	9	9	1	0	0	0
OTU_299	Chordata	Actinopteri	Perciformes	Percidae	Perca	Perca fluviatilis	98.125	Midori2	GCGGTTATACGAGAGGCCCAAGTTGATAGACATCGGCGTAAAGCGTGGTTAAGATTATACAATACTAAAGCCGAACACCTTCAGAGCTGTTATACGCATCCGAAGGTAAGAAGTTCAACCACGAAAGTGGCTTTATAGCCCCTGAACCCACGAAAGCTGAGAAA	6	11	11	3	6	5	5	9	3	5	8	2	4	5	10	5	11	6	4	12	2	2	3	7	4	5	10	1	2	7	11	7	8	7	3	5	4	4	0	0
OTU_300	Chordata	Mammalia					83.436	Midori2	GCGGCCATACAATTAACCTGAGCTAATAGAACTCGGCATAAAGAGTGTTTTAGATCTATCCTTAACAACGCTAAGCGTCATCTAGGTTGTAAAAAACCCTAGCTGAAATAAAATAAACTACGAAGGAGGCTTTAATACTTCTGAAGACACAATAGCTGAGACC	0	0	0	0	0	0	0	0	0	11	0	0	0	0	0	0	0	0	0	0	0	0	38	186	50	0	0	0	0	54	0	0	0	0	0	0	0	0	0	0
OTU_301	No Match	No Match	No Match	No Match	No Match	No Match	No Match	Midori2	AACGCATCACCTGAGCCTAGCCCGCTTACGCCGCGTTGCTTTCGGTAAACCCAATCAAGAGCGCTGAAGGCTGACCATCCGGCGGCGGCCGTCAAACCTCGCTCCAGAAACACGCCGTTCAAGTGAGCGAGTCCGAGACCCACGGCTAGGACAGCGAGGATCGGC	0	0	0	0	0	0	0	0	0	0	0	0	0	0	0	0	349	0	0	0	0	0	0	0	0	0	0	0	0	0	0	0	0	0	0	0	0	0	0	0
OTU_302	Chordata	Actinopteri	Cypriniformes	Leuciscidae	Rutilus	Rutilus rutilus	97.661	Midori2	GCGGTTAAACGAGAGGCCCTAGTTAATAATACACTGCGTAAAGGGTGGTTAAGGGAAGCACAACAATAAAGCCAAATGGCCCTTTGTCTGTCATACGCTTCTAGGTGTCCGAAGCCCAATATACGAAAGTAGCTCTAATAAAGCCCACCTGACCCCACGAAAGCTGAGAAA	0	1	1	1	0	0	1	0	1	4	1	1	0	0	0	1	0	1	1	0	0	0	0	0	1	0	0	8	0	1	0	0	0	0	0	13	13	0	0	0
OTU_303	Chordata	Actinopteri	Cypriniformes	Leuciscidae	Leuciscus		96.512	Midori2	GCTGTTAATCGAAAGGCCCCAGTTAATAATACACGGCGTAAAGGGTGGTTAAGGAAAGTATTAACAATAAAGCCGAATGGCCCTTTGGCTGTCATACGCTTCTAGGTGTCCGAAGCCCAATATACGAAAGTAGCTTTAATAAAGCCCACCTGACCCCACGAAAGCTGAGAAA	44	47	41	51	30	48	32	48	35	61	34	78	103	93	72	116	54	93	86	91	43	23	26	21	28	39	87	62	31	12	83	110	201	93	35	41	51	41	0	0
OTU_304	Chordata	Actinopteri	Cypriniformes	Leuciscidae			94.152	Midori2	GCGGTTAAACGAGAGGCCCTAGTTAATAATACACGGCGTAAAGGGTGGTTAAGGAAAGCATAACAATAAAGCCGAATGGCCCTTTGGCTGTCATACGCTTCTAGGTGTCCGAAGCCCAATAGCTTTAATAAAGCCCACCTGACCCCACGAAAGCTGAGAAA	0	0	0	0	0	0	0	0	0	0	0	0	0	0	0	0	0	0	0	0	0	0	0	0	0	0	0	0	0	0	0	0	0	0	0	0	0	0	0	0
OTU_305	Chordata	Actinopteri	Gobiiformes	Gobiidae	Ponticola		95.122	Midori2	GCGGTTATACGAGAGGCCCGAGTTGACAAACATTCGGCGTAAAGCGTGGTTAATAACTTACTAAAGCCAAACACCTTTAAGGCTGTTATACGCCCCCAAAGGTAGGAAGACCCCTCACGAAAGTAGCTTTAATTTTCATGAAGCCACGAAAGCTAGGAAA	162	199	257	423	41	77	127	102	99	276	198	94	140	174	144	207	124	384	286	137	98	0	248	218	141	139	196	76	84	109	248	140	288	226	188	236	153	216	0	0
OTU_306	Chordata	Actinopteri	Cypriniformes	Leuciscidae	Leuciscus		96.512	Midori2	GCGGTTATACGAGAGGCCCAAGTTAATAATACACGGCGTAAAGGGTGGTTAAGGAAAACATAACAATAAAGCCGAATGGCCCTTTGGCTGTCATACGCTTCTAGGTGTCCGAAGCCCAATAGTACGAAAGTAGCTTTAATAAAACCCACCTGACCCCACGAAAGCTAAGAAA	65	72	75	0	64	0	20	0	63	64	177	0	73	1	1	164	91	236	80	44	0	0	0	0	1	0	0	0	25	15357	186	2	2	92	1	5	3	0	0	0
OTU_307	No Match	No Match	No Match	No Match	No Match	No Match	No Match	Midori2	CTCGAAGCCGCTCCGCACGCAGACGCTGGTCATCGGCCAGCGGCGAAACGAGGTGCTCCTGCCAGATGTCAGCCAGATGCTCGCCGTAGCGCGGAGCGGCCAGCAAGGCGTCAATTAGCTTTGATCGCTTCGTCGAGTCGGTGTCCGCGAGAAAGCGGCTGGTCTGATC	0	0	0	0	0	0	0	0	0	0	0	0	0	305	0	12	0	0	0	0	0	0	0	0	0	0	0	0	0	0	3	0	0	0	0	0	0	0	0	0
OTU_308	Chordata	Actinopteri	Clupeiformes	Clupeidae	Sardina	Sardina pilchardus	100	Midori2	GCGGTTATACGAGAGGCCCTAGTTGATTTAATCGGCGTAAAGAGTGGTTATGGAGAGTTAAAAAATAGAGCTGAAGACCTCTCGGGCCGTAATACGCATCCAGAAGTTCGAATCACAAACACGAAAGTAGCTTTACCTTCTTCCACCAGAATCCACGACAGCTGGGACA	0	0	0	0	0	0	0	0	0	0	0	0	0	0	0	0	0	0	0	0	0	0	0	0	0	0	0	0	0	0	329	0	0	0	0	0	0	0	0	0
OTU_309	Chordata	Actinopteri	Gobiiformes	Gobiidae	Neogobius	Neogobius melanostomus	98.773	Midori2	GCGGTTATACGAGAGGCCCAAGTTGACAAAAATCGGCGAAAAGCGTGGTTAGTGATATCACCTCCACTAAAGCCAAACACCTTCAAGGCTGTAATACGCCCCCGAAGACAGGAAGCCCAATCACGAAAGTAGCTTTAATTTTCATGAACCCACGAAAGCCAGGGCC	88	132	110	98	84	158	97	105	61	90	94	96	75	110	107	102	94	98	77	110	51	67	125	125	103	65	188	129	82	87	130	86	108	157	134	91	102	246	0	18
OTU_310	Chordata	Actinopteri	Cypriniformes	Leuciscidae	Vimba/Blicca	Vimba vimba / Blicca bjeorkna	99.394	manual check	GCGGTTAAACGAGAGGCCCCAGTTAATAATACACGGCGTAAAGGGTGGTTAAGGAAAGTATAACGAAAAGCCGAATGGCCCTTTGGCTGTCATACGCTTCTAGGTGTCCGAAGTCCAATATACGAAAGTAGCTTTAATAGAGCCCACCTGACCCCACGAAAGCTACGATA	0	0	5	0	22	0	14	0	0	0	0	0	0	15	0	0	0	0	0	0	0	0	0	0	0	17	0	0	0	0	0	0	6	0	0	0	0	14	0	0
OTU_311	No Match	No Match	No Match	No Match	No Match	No Match	No Match	Midori2	AAGAAATAGGTATCGAAACCTCGTTTGCACGCGACCGCCACATGCAGAAGTGGTTCACGGAGCGCGGAATCTCATGGCATGAATCGCCCTATGGTTCGGTTCGGCGAGGTCTCAAACGCCGTGACGACTGGAACGCCCACTGGAACGAGGTCATGTTTAAGGAGCCCCTTATGCAGG	0	0	0	0	0	0	0	0	0	0	0	0	0	0	0	7	0	0	0	316	0	0	0	0	16	0	1	0	0	0	0	0	0	0	0	0	0	0	0	0
OTU_312	Chordata	Actinopteri	Cypriniformes	Leuciscidae	Abramis	Abramis brama	100	Midori2	GCGGTTAAACGAGAGGCCCCAGTTAATAATACACGGCGTAAAGGGTGGTTAAGGAAAGTATTAACAATAAAGCCGAATGGCCCTTTGGCTGTCATACGCTTCTAGGTGTCCGAAGTTCAACATACGAAAGTAGCTTTAATAACGCCCACCTGACCCCACGAAAGCCAGGGCC	524	638	798	1291	1402	1426	902	860	682	1537	798	665	444	627	904	948	866	707	979	786	1180	1088	772	951	824	778	959	956	705	1020	1143	645	1094	2116	615	818	675	1391	0	302
OTU_313	Chordata	Actinopteri	Cypriniformes	Leuciscidae	Abramis		96.512	Midori2	GCGGTTATACGAGAGGCCCCAGTTAATAATACACGGCGGGTGGTTAAGGAAAGTATTAACAATAAAGCCGAATGGCCCTTTGGCTGTCATACGCTTCTAGGTGTCCGAAGTTCAACATACGAAAGTAGCTTTAATAACGCCCACCTGACCCCACGAAAGCTGAGAAA	20	23	29	41	31	36	21	31	32	24	15	26	22	28	29	38	50	18	28	34	16	21	40	33	37	31	45	31	19	25	59	29	53	47	19	31	30	42	0	1
OTU_314	Chordata	Actinopteri	Perciformes	Percidae	Perca		96.988	Midori2	GCGGTTATACGAGAGGCCCAAGTTGATGGACATCGGCGTAGCGTGGTTAAGATTAAAGACAATACTAAAGCCGAACACCTTCAGAGCTGTTATACGCATCCGAAGGTAAGAAGTTCAACCACGAAAGTGGCTTTATAGCCCCTGAACCCAAAAGCTACGATA	6	12	8	11	2	6	7	4	1	2	2	9	3	16	5	16	6	3	10	4	0	6	4	2	4	4	4	5	8	2	1	7	5	7	2	4	2	3	0	0
OTU_315	Chordata	Actinopteri	Cypriniformes				97.633	Midori2	TCGGTTAGACGAGAGGCCCTAGTTGATATTACAACGGCGTAAAGGGTGGTTAAGGATAAACAAAAATAAAGTCAAATGGCCCCTTGGCCGTCATACGCTTCTAGTCCGAAGCCCTAATACGAAAGTAACTTTAATAACGCCCACCTGACCCCACGAAAGCTGAGAAA	64	90	155	181	271	194	165	301	150	163	218	225	270	277	375	281	257	175	275	249	52	0	38	51	132	140	171	147	206	114	399	172	286	336	108	149	102	96	0	0
OTU_316	Chordata	Actinopteri	Cypriniformes	Leuciscidae	Leuciscus	Leuciscus leuciscus	99.394	Midori2	GCGGTTAAACGAGAGGCCCCAGTTAATAATACACGGCGTAAAGGGTGGTTAAGGAGAGCATAACAATAAAGCCGAATGGCCCTTTGGCTGTCATACGCTTCTAGGTGTCCGAAGCCCAATATACGAAAGTAGCTTTAATAAAGCCCACCTGACCCCACGAAAGCTACGGCA	433	148	457	899	459	360	505	307	544	200	406	563	2221	1050	3576	4639	1256	1312	2149	1663	516	1351	292	316	10	613	1114	1321	162	15	1451	792	2231	1470	28	482	411	384	0	0
OTU_317	Chordata	Actinopteri	Cypriniformes	Leuciscidae			95.93	Midori2	GCGGTTAAACGAGAGGCCCCAGTTAATACACGGCGTAAAGTGTGGTTAAGGAAAGTATTAACAATAAAGCCGAATGGCCCTTTGGCTGTCATACGCTTCTAGGTGTCCGAAGCCCAATATACGAAAGTAGCTTTAATAAAGCCCACCTGACCCCACGAAAGCTGAGAAA	1	4	4	2	0	4	4	3	2	2	3	3	2	6	3	7	2	4	3	3	0	3	1	2	1	2	2	6	3	0	5	3	8	6	2	5	0	5	0	0
OTU_318	Chordata	Actinopteri	Cypriniformes	Leuciscidae	Squalius	Squalius cephalus	97.076	Midori2	GCGGTTATACGAGAGGCCCTAGTTAATAATACACGGCGTAAAGGGTGGTTAAGGAAAACATAAATAAAGCCGAATGGCCCTTTGGCTGTCATACGCTTCTAGGTGTCCGAAGCCAAATATACGAAAGTAGCTTTAATAAAGTCCACCTGACCCCACGAAAGCTGAGAAA	35	48	137	19	31	55	52	24	21	65	46	52	21	85	13	41	36	44	11	26	34	0	18	41	14	11	25	34	27	25	25	32	31	53	46	32	120	18	0	0
OTU_319	Chordata	Actinopteri	Gobiiformes	Gobiidae	Neogobius	Neogobius melanostomus	97.59	Midori2	GCGGTTATACGAGAGGCCCAAGTTGACAAAAATCGGCGAAAAGCGTGGTTAGTGATATCACCTCCACTAAAGCCAAACACCTTCAAGGCTGTAATACCCCCCGGAGACGAAGCCCAATCACGAAAGTAGCTTTAATTTTCATGAAGCCACGAAAGCTAGGAAA	0	0	0	0	0	0	0	1	0	0	0	0	1	0	0	0	0	0	0	0	0	2	0	0	0	0	0	0	0	0	1	0	0	0	0	0	0	0	0	0
OTU_320	Chordata	Actinopteri	Gobiiformes	Gobiidae	Neogobius	Neogobius melanostomus	98.193	Midori2	GCGGTTATACGAGAGGCCCAAGTTGACAAAAATCGGCGAAAAGCGTGGTTAGTGATATCACCTCCACTAAAGCCAAACACCTTCAAGGCTGTAATACGCCCCCGAAGACAGGAAGCCCAATCACGAAAGTAGCTTTAATTTTCATGAAGCCACGACAGTTGAGGAA	10	19	8	9	6	11	10	6	5	12	5	20	16	6	11	10	12	8	14	6	4	7	11	9	10	12	10	11	4	2	6	12	28	20	6	7	15	13	0	0
OTU_321	Chordata	Actinopteri	Cypriniformes	Leuciscidae	Alburnus	Alburnus alburnus	98.246	Midori2	GCGGTTAGACGAGGGGCCCTAGTTAATAATACGCGGCGTAAAGGGTGGTTAAGGAAAGCATAACAATAAAGCCGAATGGCCCCTTGCTGTCATACGCTTCTAGGTGTCCGAAGCCCAATATACGAAAGTAGCTTTAATAAGGCCCACCTGACCCCACGAAAGCTGAGGAA	0	0	198	56	20	188	50	38	1	2	51	39	62	0	0	42	124	26	6	16	183	0	74	4	0	1	8	0	0	83	15	17	21	0	58	12	44	205	0	0
OTU_322	Chordata	Mammalia	Artiodactyla	Bovidae	Bos	Bos taurus	97.546	Midori2	GCGCTCATACGATTAACCCAAGCTAACATGAGTACGGCGTAAAACGTGTTAAAGCGCCATACCAAATAGGGTTAAATTCTAACTAAGCTGTAAAAAGCCATGATTAAAATAAAAATAAATGACGAAAGTGACCCTACAATCCGACGCACTATAGCTAAGACC	0	0	0	0	0	0	0	0	0	1	0	0	0	0	0	0	0	0	0	0	0	0	0	0	0	0	0	0	0	0	0	0	0	0	0	0	0	0	0	0
OTU_323	Chordata	Actinopteri	Gobiiformes	Gobiidae	Ponticola	Ponticola kessleri	97.531	Midori2	GCGGTTATACGAGAGGCCCGAGTTGACAAACATTCGGCGTAAAGCGTGGTTAATAACTTATTTACTAAAGCCAAACACCTTTAAGGCTGTTATACGCCCCCAAAGGTAGGAAGACCCCTCACGAAAGTAGCTTTTACTATGAATCCACGAAAGCTACGATA	0	3	1	4	0	0	0	0	0	0	3	1	0	1	1	1	1	0	3	1	1	0	0	0	2	0	1	0	0	0	0	0	0	1	2	1	0	0	0	0
OTU_324	Chordata	Actinopteri	Perciformes	Percidae	Sander		96.364	Midori2	GCGGTTATACGAGAGGCCCAAGTTGATAGACATCGGCGTAAAGCGTGGTTAAGACAAAAACAAAACTAAAGCCGAACACCTTCAGAGCTTACGCACCCGAAGGTAAGAAGTTCAACCACGAAAGTGGCTTTATAGCCCCTGAACCCACGAAAGCTACGATA	4	11	0	2	0	0	0	0	1	3	1	2	2	2	0	1	4	3	2	4	1	0	0	0	0	2	9	6	2	1	3	1	5	4	3	1	0	0	0	0
OTU_325	Chordata	Actinopteri	Cypriniformes	Leuciscidae	Rutilus	Rutilus rutilus	97.674	Midori2	GCGGCTAAACGAGGGGCCCTAGTTAATAATACACGGCGTAAAGGGTGGTTAAGGGAAGCACAATAATAAAGCCAAAATGGCCCTTTTGCTGTCATACGCTTCTAGGTGTCCGAAGCCCAATATACGAAAGTAGCTTTAATAAAGCCCACCTGACCCCACGAAAGCTGAGAAA	6	21	4	5	0	8	9	3	24	20	7	24	12	0	3	9	33	6	4	10	0	6	2	4	11	7	0	2	7	3	8	2	9	4	1	6	7	6	0	0
OTU_326	Chordata	Actinopteri	Gobiiformes	Gobiidae	Neogobius		96.386	Midori2	GCGGTTATACGAGAGGCCCAAGTTGACAAAAATCGGCGAAAAGCGTGGTTAGTGATATCACCTCCACTAAAGCCAAACACCTTCAAGGCTGTAATACGCCCCCAAAGGTAGGAAGACCCCTCACGAAAGTAGCTTTAATTTTCATGAAGCCACGAAAGCTAGGAAA	49	62	103	120	15	19	39	34	36	121	48	36	31	51	34	54	43	111	66	25	34	0	93	89	49	38	67	16	30	49	86	39	80	70	60	87	50	85	0	0
OTU_327	Chordata	Actinopteri	Perciformes	Percidae	Perca		95.783	Midori2	GCGGTTATACGAGAGGCCCAAGTTGATAGACATCGGCGTAAAGCGTGGTTAAGATTAAAGACAATACTAAAGCCGAACACCTTCAGAGCTGTTATACGCACCCGAAGGTAAGAAGTTCACGAAAGTGGCTTTATTACCCCTGAACCCACGAAAGCTACGATA	3	5	1	5	2	1	3	1	3	1	3	7	4	0	0	3	7	6	9	0	0	0	0	0	9	2	3	2	1	2	3	3	4	0	4	1	0	0	0	0
OTU_328	Chordata	Actinopteri	Cypriniformes	Leuciscidae	Abramis	Abramis brama	98.193	Midori2	GCGGTTAAACGAGAGGCCCCAGTTAATAATACACGGCGTAAAGGGTGGTTAAGGAAAGTATTAACAATAAAGCCGAATGGCCCTTTGGCTGTCATACGCTTCTAGGTGTCCGAAGTTCAACATACGAAAGTAGCTTTAATAACGCCCACCCCCCACGAAAGCTACGATA	239	247	80	130	76	87	102	117	107	90	91	132	112	144	175	174	226	133	198	103	41	89	110	80	156	125	227	163	111	98	158	117	191	199	130	164	97	102	0	1
OTU_329	Chordata	Actinopteri	Cypriniformes	Leuciscidae	Alburnus	Alburnus alburnus	98.246	Midori2	GCGGTTAAACGAGGGGCCCTAGTTAATAATACGCGGCGTAAAGGGTGGTTAAGGAAAGCATAACAATAAAGCCGAATGGCCCTTTGGCTGTCATACGCTTCTAGGTGTCCGAAGCCCAATATACGAAAGTAGCCTTAATAAGGCCCACCTGACCCCAAAAGCTGAGGAA	0	0	119	51	18	115	66	36	25	0	71	32	40	0	0	37	81	38	4	22	251	0	160	0	0	0	7	0	0	90	11	10	10	0	68	8	44	145	0	0
OTU_330	Chordata	Actinopteri	Gobiiformes	Gobiidae	Neogobius	Neogobius fluviatilis	97.516	Midori2	GCGGTTATACGAGAGGCCCAAGTTGACAAAGATCGGCGTAAAGCGTGGTTAATGATAGTTCCACTAAAGCCAAACACCTTCAAGTCTGTTATACGCCCCCGAAGACAGGAAGACCCATCACGAAAGTAGCTTTAATCTTCATGAACCCACGAAAGCTACGATA	1	20	0	0	0	0	0	0	0	0	0	0	0	0	0	0	0	4	1	0	0	0	0	0	0	0	0	0	0	0	8	0	0	0	16	0	0	0	0	0
OTU_331	Chordata	Actinopteri	Perciformes	Gasterosteidae			96.97	Midori2	GCGGTTATACGAGAGGCCCAAGTTGATGAATTACGGCGTAAAGAGTGGTTAAGCTAAAATTAAAACTAAAGCCGAACACCCCCAAAGCTGTTATACGCACCCGGGGGTAAGAAGTTCAACCACGAAGGTGGCTTTATTAAACCTGAACCCACGAAAGCTACGGCA	0	48	0	0	0	0	0	0	0	0	0	0	0	0	0	0	0	0	0	0	0	0	0	0	67	1	0	51	0	57	0	0	0	0	0	31	0	0	0	0
OTU_332	Chordata	Mammalia	Primates	Hominidae			96.386	Midori2	GCGGTCACACGATTAACCCAAGTCAATAGAAACCGGCGTAAAGAGTGTTTTAGATCAATTCCCCTCAATAAAGCTAAAATTCACCTGAGTTGTAAAAAACTCCAGTTGACACAAAATAGACTACGAAAGTGGCTTTAACATATCTGAACACACAATAGCTAAGACC	0	18	8	0	3	0	0	0	0	17	0	0	0	0	1	2	0	0	0	171	0	0	0	0	0	94	0	1	0	7	0	0	0	4	0	0	4	0	0	0
OTU_333	Chordata	Actinopteri	Cypriniformes				96.45	Midori2	GCGGTTATACGAGAGGCCCTAGTTGATATTACAACGGCGTAAAGGGTGGTTAAGGATAAACAAAAATAAAGTCAAATGGCCCCTTGTCCGTCATACGCTTCTAGGAGTCCGGAGCCCTAATACGAAAGTAACTTTAATAAACCCTGACCCCACGAAAGCTGAGAAA	0	1	2	0	2	0	6	4	0	0	0	3	3	0	0	1	4	2	3	1	0	0	0	1	0	3	3	1	0	1	7	1	1	0	3	1	0	1	0	0
OTU_334	Chordata	Actinopteri	Gobiiformes	Gobiidae	Neogobius		96.988	Midori2	GCGGTTATACGAGAGGCCCAAGTTGACAAAAATCGGCGAAAAGCGTGGTTAGTGATATCACCTCCACTAAAGCCAAACACCTTCAGAGCTGTTATACGCATCCGAAGACAGGAAGCCCAATCACGAAAGTAGCTTTAATTTTCATGAAGCCACGAAAGCTAGGAAA	1	6	0	1	0	0	1	0	0	1	0	2	1	5	3	5	0	5	4	6	0	0	2	0	1	0	1	2	1	2	5	2	5	4	1	4	0	1	0	0
OTU_335	Chordata	Actinopteri	Gobiiformes	Gobiidae			94.41	Midori2	GCGGTTATACGATAGGCCCAAGTTGACAAAAACCGCGAAAAGCGCGTTAGTGATATCACCTCCACTAAAGCCAAACACCTTCAAGGCTGTAATACGCCCCCGAAGACAGGAAGCCCAATCAAAAGTACCTTTAATTTTCATAAGCCACGAAAGCTAAAA	0	0	0	0	0	0	0	0	0	0	0	0	0	0	0	0	0	0	0	0	0	0	0	0	0	0	0	0	0	0	0	0	0	0	0	0	0	0	0	0
OTU_336	Chordata	Actinopteri	Gobiiformes	Gobiidae	Neogobius		96.988	Midori2	GCGGTTATACGAGAGGCCCAAGTTGACAAAAATCGGCGAAAACGTGGTTAGTGATATCACCTCCACTAAAGCCAAACACCTTCAAGGCTGTAATACGCCCCCGAAGGCAGGAAGCCCAATCACGACTAGCTTTAATTTTCATGAAGCCACGAAAGCTAGGAAA	0	4	3	1	1	0	0	1	9	1	1	2	4	0	4	4	3	1	0	1	2	2	1	2	0	1	3	1	1	1	3	3	2	0	2	1	1	0	0	0
OTU_337	Chordata	Actinopteri	Perciformes	Percidae	Perca		96.988	Midori2	GCTGTTATACGAGAGGCCCAAGTTGATAGACATCCGCGTAAAGCGTGGTTAAGATTAAACACAATACTAAAGCCGAACACCTTCAGAGCTGTTATACGCATCCGAAGGTAAGAAGTTCAACCACGAAAGTGGCTTTATTACCCCTGAACCCACGAAAGCTACGATA	0	0	0	0	0	0	0	0	0	0	0	0	0	0	0	0	0	0	0	0	0	0	0	0	0	0	4	0	0	0	0	0	0	0	0	0	0	0	0	0
OTU_338	Chordata	Actinopteri	Perciformes	Percidae	Sander		96.364	Midori2	GCGGTTATACGAGAGGCCCAAGTTGATAGACATCGGCGTAAAGCGTGGTTAAGACAAAAACAAAACTAAAGCCGAACACCCCCAAAGCTGTTATACGCATCCGAAGGTAAGAAGTTCAACCACGAAAGTGGCTTTATAGCCCCTGAACCCACGAAAGCTACGATA	11	29	5	9	2	0	6	9	5	6	8	14	5	3	3	8	19	11	16	5	1	0	2	4	10	5	12	7	12	16	7	9	4	4	6	11	5	4	0	0
OTU_339	Chordata	Actinopteri	Gobiiformes	Gobiidae	Neogobius		96.988	Midori2	GCGGTTATACGAGAGGCCCAAGTTGACAAAAATCGGCGAAAAGCGTGGTTAGTGATATCACCTCCACTAAAGCCAAACACCTTCAAGGCTGTAATACGCCCCCGAACACAGGAAGCCCAATCACGAATAGCTTTAATTTTCATGAAGCCACGAAAGCTGAGAAA	1	0	0	1	0	0	0	0	1	0	0	0	0	2	0	2	0	1	1	0	1	0	0	0	0	0	0	2	0	2	0	1	1	1	1	0	0	0	0	0
OTU_340	Chordata	Actinopteri	Cypriniformes	Leuciscidae	Abramis		95.93	Midori2	GCGGTTAAACGAGAGGCCCTAGTTAATAATACACGGCGTAAAGGGTGGTTAAGGAAAGCATAACAATAAAGCCGAATGGCCCTTTGGCTGTCATACGCTTCTAGGTGTCCGAAGTTCAACAAAAGTAGCTTTAATAACGCCCACCTGACCCCACGAAAGCTGAGAAA	21	38	47	63	45	37	29	47	25	84	52	90	38	62	33	45	94	75	73	80	40	45	36	23	35	59	75	34	31	14	72	74	154	66	40	18	30	53	0	0
OTU_341	Chordata	Actinopteri	Cypriniformes	Cyprinidae	Capoeta		96.471	Midori2	GCGGTTAGACGAGAGGCCCTAGTTGATATTATAACGGCGTAAAGGGTGGTTAGGGATAAATAATAATAAAGCCAAATGGCCCCTTGGCCGTCATACTTCTAGGTGTCCGAGGCCCTATATACGAAAGTAACTTTAATAAACCCACCTGACCCCACGAAAGCTGAGAAA	26	37	125	92	34	28	191	104	60	34	78	99	152	106	121	127	101	84	67	74	0	0	44	47	52	57	82	112	42	38	105	63	82	86	27	36	33	22	0	0
OTU_342	No Match	No Match	No Match	No Match	No Match	No Match	No Match	Midori2	CGTCCAAGCAGCTTGGAAATTGAAACCACCAGTAACGGCATCAATATTTAGTACTTCCCCTGCAAAGAACAAGTTTTCATATTTTTTTGAGGCAAAAGTTTCTGAATCTATTTCTGAGAGATCAATACCACCGGCAGTCACAAATTCCTCTTTAAAAGTACTTTTGCCGTTTACAT	0	0	0	0	0	0	0	0	0	0	0	0	0	0	0	0	0	0	0	0	255	0	0	0	0	0	0	0	0	0	0	0	0	1	0	0	0	0	0	0
OTU_343	Chordata	Actinopteri	Cypriniformes	Leuciscidae	Rutilus		96.491	Midori2	GCGGTTAAACGAGAGGCCCTAGTTAATAATACACGGCGTAAAGGGTGGTTAAGGGAAGCACAATAATAAAGCCAAATGGCCCTTTGGCTGTCATACGCTTCTAGGTGTCCGAAGCCCAATATACGAAAGTAGCTTTAACATAATTAACCTGACCCCACGAAAGCTGAGAAA	67	81	34	50	10	39	50	52	62	93	42	79	81	42	48	123	71	81	71	65	0	93	16	14	71	70	24	42	21	35	43	20	88	60	26	32	56	34	0	0
OTU_344	Chordata	Actinopteri	Esociformes	Esocidae	Esox		96.951	Midori2	GCGGTTATACGAGAGGCCCAAGTTGATAATTGTCGGCGTAAAGAGTGGTTTAGAAAATAATTTAAAAGCCGAACACCTCCTCAGTTTATACACATTTGAAGATATGAAGCCCTACCGCGAAAGCAGCTTTAAGTATCCTGAACCCACGACAGCTATGGTA	0	0	0	0	0	0	0	0	0	0	0	0	0	0	0	0	0	0	0	0	0	0	0	0	0	0	0	0	0	0	0	0	0	0	0	0	0	0	0	0
OTU_345	Chordata	Actinopteri	Cypriniformes	Leuciscidae	Rutilus	Rutilus rutilus	97.661	Midori2	GCGGTTAAACGAGAGGCCCTAGTTAATAATACACGGCGTAAAGGGTGGTTAAGGGAAGCACAATAATAAAGCCGAATGGCCCTTTGGCTGTCATACGCTTCTAGGTGTCCGAAGCCCATACGAAAGTAGCTTTAATAAAGCCCACCTGACCCCACGAAAGCTGAGAAA	184	352	96	140	46	102	149	150	167	303	142	420	548	240	143	435	233	408	258	259	11	232	79	57	172	243	91	150	67	83	145	124	346	216	68	60	143	137	0	0
OTU_346	Chordata	Actinopteri	Perciformes	Percidae	Perca	Perca fluviatilis	99.367	Midori2	GCGGTTATACGAGAGGCCCAAGTTGATAGACATCGGCGTAAAGCGTGGTTAAGATTAAAGACAATACTAAAGCCGAACACCTTCAGAGCTGTTATACGCATCCGAAGGTAAGAAGTTCAACCACGAAAGTGGCTTTATAGCCCCTGAACCCACGACAGTTGAGGAA	6	11	6	4	0	4	9	2	2	2	2	16	13	2	8	8	7	9	8	0	4	0	11	4	3	2	4	3	2	3	8	11	7	12	2	0	3	10	0	0
OTU_347	Chordata	Actinopteri	Cypriniformes				95.882	Midori2	GCGGTTAGACGAGAGGCCCTAGTTGATATTACAACGGCGTAAAGGGTGGTGATAAACAAAAATAAAGTCAAATGGCCCCTTGGCCGTCATACGCTTCTAGGAGTCCGAAGCCCTAATACGAAAGTAGCTTTAATAACGCCCACCTGACCCCACGAAAGCTGAGAAA	0	2	3	0	4	3	3	1	0	4	4	4	3	2	2	4	2	3	5	4	1	0	0	0	1	1	1	1	1	0	6	1	4	0	0	2	2	0	0	0
OTU_348	Chordata	Actinopteri	Perciformes	Percidae	Sander		96.364	Midori2	GCGGTTATACGAGAGGCCCAAGTTGATAGACATCGGCGTAAAGCGTGGTTACAAAAACAAAACTAAAGCCGAACACCTTCAGAGCTGTTATACGCATCCGAAGGTAAGAAGTTCAACCACGAAAGTGGCTTTATAGCCCCTGAACCCACGAAAGCTACGATA	3	35	8	9	4	0	7	3	8	3	5	7	2	2	1	12	9	15	16	3	2	0	5	3	4	2	6	9	2	6	2	3	9	3	7	6	2	3	0	0
OTU_349	No Match	No Match	No Match	No Match	No Match	No Match	No Match	Midori2	ATGGCGTGACGATCCTCTTTACCCGTGCCGGCTCCGATGATGTCCCATGGGGTCTCGACTACAGGAAAAACCATGAAACCCACAGCACCCGTTCCTCTGGAAATCAATTTTCGTCATCTGGCCAACTCCGAGGCCCTTGAGACCCACATACGCCACCATGTCGA	0	0	2	81	5	0	43	0	0	29	0	8	2	0	22	0	0	2	0	0	4	1	6	4	1	0	1	0	0	0	0	0	2	8	0	8	0	0	0	0
OTU_350	Chordata	Actinopteri	Cypriniformes	Leuciscidae	Leuciscus	Leuciscus leuciscus	97.076	Midori2	GCGTTTAAACGAGAGGCCCTAGTTAATAATACACGGCGTAAAGGGTGGCTAAGGAGAGCATAACAATAAAGCCGAATGGCCCTTCCGCTGTCATACGCTTCTAGGTGTCCGAAGCTCAATATACGAAAGTAGCTTTAATAAAGCCCACCTGACCCCACGAAAGCTGAGAAA	0	0	0	0	138	0	1	0	1	0	0	0	3	3	61	6	1	0	2	2	1	0	0	0	0	0	0	2	3	0	0	0	0	0	0	0	0	0	0	0
OTU_351	Chordata	Actinopteri	Perciformes	Percidae	Sander		96.97	Midori2	GCGGTTATACAGGCCCAAGTTGATAGACATCGGCGTAAAGCGTGGTTAAGACAAAAACAAAACTAAAGCCGAACACCTTCAGAGCTGTTATACGCACCCGAAGGTAAGAAGTTCAACCACGAAAGTGGCTTTATAGCCCCTGAACCCACGAAAGCTACGATA	17	44	7	11	6	0	16	18	13	3	11	6	2	4	1	16	9	7	12	12	4	0	1	0	14	1	14	16	4	10	8	16	14	4	11	9	2	1	0	0
OTU_352	Chordata	Actinopteri	Cypriniformes	Leuciscidae	Rutilus	Rutilus rutilus	97.661	Midori2	GCGGTTAAACGATAGGCCCTAGTTAATAATACACGGCGTAAAGGGTGGTTAAGGGAAGCACAATAATAAAGCCAAATGGCCCTTTCTGTCATACGCTTCTAGGTGTCCGAAGCCCAATATACGAAAGTAGCTTTAATAACGCCCACCTGACCCCACGAAAGCTGAGAAA	28	54	12	21	4	19	19	30	29	51	19	45	51	25	15	27	31	36	24	23	1	42	12	9	18	24	6	16	9	19	23	15	27	31	7	12	27	24	0	0
OTU_353	Chordata	Actinopteri	Cypriniformes				95.322	Midori2	GCGGTTAAACGAGAGGCCCTAGTTGATAATATTACGGCGTAAAGGGTGGTTAAGGAAAATAAATTAATAAAGTCAAATGGCCCCTTGGCCGTCATACGCTTCTAGGAGTCCGAAGCCCTAATACGAAAGTAACTTTAATAAACCCACCTGACCCCACGAAAGCTGAGAAA	0	0	0	0	0	0	0	0	0	0	0	0	0	0	27	13	5	0	0	0	0	0	0	0	0	0	0	0	0	0	11	0	0	11	0	0	0	0	0	0
OTU_354	Chordata	Actinopteri	Cypriniformes	Leuciscidae	Abramis		96.491	Midori2	CGGTTAAACGACCCCCCAGTTAATAATACACGGCGTAAAGGGTGGTTAAGGAAAGTATTAACAATAAAGCCGAATGGCCCTTTGGCCGTCATACGCTTCTAGGTGTCCGAAGTTCAACATACGAAAGTAGCTTTAATAACCCCCACCTGACCCCACGAAAGCTGAGAAA	0	1	0	0	0	1	0	0	0	0	0	0	0	0	0	1	0	0	0	1	1	0	1	0	0	0	0	0	0	0	0	0	0	0	0	0	0	0	0	0
OTU_355	Chordata	Actinopteri	Perciformes	Percidae	Perca	Perca fluviatilis	98.125	Midori2	GCGGTTATACGAGAGGCCCAAGTTGATAGACATCGGCGTAAAGCGTGGTTATTAAAGACAATACTAAAGCCGAACACCTTCAGAGCTGTTATACGCATCCGAAGGTAAGAAGTTCAACCACGAAAGTGGCTTTATAGCCCCTGAACCCACGAAAGCTGAGAAA	3	5	3	3	2	3	1	14	6	3	7	3	11	7	15	7	5	0	7	5	3	3	4	4	2	7	3	1	6	3	5	5	18	9	5	7	2	3	0	0
OTU_356	Chordata	Mammalia	Primates				86.792	Midori2	GTGATCATACGATTAACCCAAGCTAATAGATTTCGGCGTAAAGAGTGTTTAAGATCTATTTTCAATAAAGCTAAACTCCATCTAAGTTGTAAAAAACTCCAGCTGAAATAAAATATTACGAAAGTGGCTTTAATATTCTGAAGACACAACAGCTAAGACC	0	0	0	0	0	0	0	0	0	0	0	0	0	0	0	0	0	0	25	0	0	0	14	114	0	0	0	0	0	53	0	0	0	0	0	0	0	0	0	0
OTU_357	Chordata	Actinopteri	Gobiiformes	Gobiidae	Neogobius	Neogobius melanostomus	97.561	Midori2	GCGGTTATACGAGAGGCCCAAGTTGACAAAAATCGGCGAAAAGCGTGGTTAGTGATATCACCTCCACTAAAGCCAAACACCTTCAAGGCTGTAATACGCCCCCGAAGACAGGAAGCCCAATCACGATTAGCTTTAATTTTCATGAAGCCACGAAAGCTACGATA	33	27	9	17	13	17	23	9	8	9	8	34	24	17	24	31	26	25	23	16	10	15	14	13	23	15	25	19	19	15	12	15	23	16	25	22	10	21	0	0
OTU_358	Chordata	Actinopteri	Gobiiformes	Gobiidae	Neogobius	Neogobius melanostomus	97.576	Midori2	TCGGTTATACGAGAGGCCCAAGTTCACAAAAATCTGCGAAAAGCGTGGTTAGTGATATCACCTCCACTAAAGCCAAACACCTTCAAGGCTGTAATACGCCCCCGAAGACAGGAACCCCAATCACGAAATTAGCTTTAATTTTCATGAAGCCACGAAAGCTAGGAAA	0	0	0	1	0	0	0	0	0	0	0	0	0	0	1	0	0	0	0	0	0	0	0	0	0	0	0	0	0	0	0	0	0	0	0	0	0	0	0	0
OTU_359	Chordata	Actinopteri	Cypriniformes	Leuciscidae	Abramis		96.512	Midori2	GCGGTTATACGAGAGGCCCAAGTTGATAATACACGGCGTAAAGGGTGGTTAAGGAGAGCATAACAATAAAGCCGAATGGCCCTTTGGCTGTCATACGCTTCTAGGTGTCCGAAGTTCAACATACGAAAGTAGCTTTAATAACGCCCACCTGACCCCACGAAAGCTGAGAAA	55	85	65	80	111	78	58	71	64	85	64	59	76	76	139	179	92	81	102	81	22	67	61	69	82	91	137	95	53	65	130	104	158	133	91	93	75	109	0	3
OTU_360	Chordata	Actinopteri	Cypriniformes	Leuciscidae	Leuciscus		97.576	Midori2	GCGGTTAAACGAGAGGCCCCTAAATAATACACGGCGTAAAGGGTGGTTAAGGAAAGCATAACAATAAAGCCGAATGGCCCTTTGGCTGTCATACGCTTCTAGGTGTCCGAAGCCCAATATACGAAAGTAGCTTTAATAAAGCCCACCTGACCCCACGAAAGCTACGATA	0	2	0	1	0	1	2	0	0	0	1	0	1	1	1	4	1	0	5	0	0	3	1	0	0	3	0	0	1	0	2	1	1	0	1	1	1	0	0	0
OTU_361	Chordata	Actinopteri	Gobiiformes	Gobiidae	Neogobius	Neogobius melanostomus	98.137	Midori2	GCGGTTATACGAGAGCCCAAGTTGACAAAAATCGGCGAAAAGCGTGGTTAGTGATGTCACCTCCACTAAAGCCAAACACCTTCAAGGCTGTAATACGCCCCCGAAGACAGGAAGCCCAATCACGAAAGTAGCTTTAATTTTCATGAGGCCACGAAAGCTAAAAA	8	8	5	9	8	15	2	1	7	6	6	8	6	6	4	5	7	10	3	2	7	8	4	10	5	4	20	6	5	6	1	10	5	5	6	14	9	9	0	5
OTU_362	Chordata	Actinopteri	Gobiiformes	Gobiidae	Neogobius	Neogobius melanostomus	97.576	Midori2	GCGGTTATACGAGATTATCAAGTTGACAAAAATCGGCGAAAAGCGTGGTTAGTGATATCACCTCCACTAAAGCCAAACACCTTCAAGGCTGTAATACGCCCCCGAAGACAGGAAGCCCAATCACGAAAGTAGCTTTAATTTTCATGAAGCCACGAAAGCTAGGAAG	1	0	0	0	2	1	0	1	2	0	0	0	0	0	2	1	0	0	1	0	0	1	0	0	1	0	0	0	1	0	0	0	1	0	1	0	0	0	0	0
OTU_363	Chordata	Actinopteri	Gobiiformes	Gobiidae	Neogobius	Neogobius melanostomus	98.802	Midori2	GCGGTTATACGAGAGGCCCAAGTTGACAAAAATCGGCGAAAAGCGTGGTTAGTGATATCACCTCCACTAAAAGCCAAACACCTCAAGGCTGTAATACGCCCCCGAAGACAGGAAGCCCAATCACGAAAGTAGCTTTAATTTTCATGAAGCCACGAAAGCTAGGAAA	35	85	47	63	253	80	61	31	41	60	51	83	43	47	43	68	65	47	40	28	60	100	40	59	66	55	80	57	36	35	65	60	73	67	53	47	44	70	0	30
OTU_364	No Match	No Match	No Match	No Match	No Match	No Match	No Match	Midori2	CCGGGAGTTCGGTTCAATCGTATGTGGGCTCCTATCAGCGCAGATCTCTGGAAGTAGAACACGGCGGCAGCAACGAGCAAGGCTATGACTGGTATTTGTCAGGCAACTTGTTCAAAGAGAAGGGTTGGAGAGACGACTCTCCCTCAGATGTCAGGCAGTTTTTCAG	0	4	1	6	0	0	0	0	0	0	0	3	0	0	0	1	0	0	0	0	167	0	0	7	0	0	2	0	0	0	1	0	1	26	0	0	0	0	0	0
OTU_365	Chordata	Actinopteri	Perciformes	Percidae			93.373	Midori2	GCGGTTATACGAGAGGCCCAAGTTGATAGACATCGGCGTAAAGCGTGGTTAAGATTAAAGACAATACTAAAGCCGAACACCTTCGGATGCGTATAACAGCTCTGAAGGTAAGAAGTTCAACCACGAAAGTGGCTTTATAGCCCCTGAACCCACGAAAGCTACGATA	0	0	0	0	0	0	0	0	0	0	0	0	0	0	0	0	0	0	0	0	0	0	0	0	0	0	0	0	0	0	0	0	0	0	0	0	0	0	0	0
OTU_366	No Match	No Match	No Match	No Match	No Match	No Match	No Match	Midori2	TGTTTTTCAAAAGCGCCGTTCACAACAAGAGCCGACCAGCCGCCGCCTTCCGACTGCGCAACGCGGGCGAGCGTGGCAGGCATGGCTTTCACCTCAAGATCGAGAACGCCATGACAGTTTTCTTCCGGGGCCGCCCCTGCCACAGGCAAAATACTGTGGGGAGA	30	19	0	2	20	0	1	0	0	4	2	8	12	0	11	0	0	0	20	14	0	1	8	1	8	1	0	0	3	0	0	23	3	0	10	0	0	6	0	0
OTU_367	Chordata	Actinopteri	Perciformes	Percidae	Perca	Perca fluviatilis	98.125	Midori2	GCGGTTATACGAGAGGCCCAAGTTGATAGACATCGGCGTAAAGCGTGGTTAAGATTAAAGACAATACTAAAGCCGAACACCTTCAGAGCTGTTATACGCATCCGAAGGTAAGAAGTTCAACCACAAAAGTGGCTTTATAGCCCCCAACCCACGAAAGCTGAGAAA	3	5	1	4	1	0	2	1	0	0	2	0	0	1	1	2	1	2	1	0	0	2	1	5	2	1	4	2	0	4	0	1	6	2	0	1	0	0	0	0
OTU_368	Chordata	Actinopteri	Cypriniformes	Leuciscidae	Rutilus	Rutilus rutilus	97.059	Midori2	CGGTTAAACGACCCCCCAGTTAATAATACACGGCGTAAAGGGTGGTTAAGGGAAGCACAATAATAAAGCCAAATGGCCCTTTGGCTGTCATACGCTTCTAGGTGTCCGAAGCCCAATATACGAAAGTAGCTTTAATAAAGCCCACCTGACCCCACGAAAGCTGAGAAA	14	27	3	15	2	16	8	16	8	29	22	20	25	30	12	15	10	29	22	9	0	11	6	11	17	14	6	20	5	7	21	10	27	22	7	5	11	7	0	0
OTU_369	Chordata	Actinopteri	Salmoniformes	Salmonidae	Salmo	Salmo trutta	99.398	Midori2	GCGGTTATACGAGAGACCCTAGTTGATAACTACCGGCGTAAAGAGTGGTTACGGAAAAATATTCAGTAAAGCCGAACACCCCCTCAGCCGTCATACGCACCTGGGGGCACGAAGATCTACTGCGAAAGCAGCTTTAATTATGCCTGAACCCACGACAGCTACGACA	0	0	0	0	0	0	0	0	0	0	0	0	0	0	0	0	0	0	0	0	0	0	0	0	0	0	0	0	0	0	0	0	0	0	0	0	0	0	0	0
OTU_370	Chordata	Actinopteri	Perciformes	Gasterosteidae	Gasterosteus	Gasterosteus aculeatus	98.148	Midori2	GCGGTTATACGAGAGGCCCAAGTTGATGAATTACGGCGTAAAGAGTGGTTAAGCTAAAATTAAAACTAAATCCGAACACCCAAAAGCTGTTATACGCATCCGGAGGTGAGAAGTTCAACCACGAAGGTGGCTTTATCTAACCTGAACCCACGAAAGCTACGATA	0	0	0	0	0	0	0	0	0	0	0	0	1	0	0	0	0	0	0	0	0	0	0	0	0	0	0	0	0	0	0	1	1	0	0	0	0	0	0	0
OTU_371	Chordata	Actinopteri	Cypriniformes	Xenocyprididae	Ctenopharyngodon	Ctenopharyngodon idella	97.11	Midori2	GCGGTTAAACGAGGGCCCCAGTTGATAACACCACGGCGTAAAGGGTGGTTAAGGAAAGCAAAACAATAAAGCCGAATGGCCCTTTGGCTGTCATACGCTTCTAGGTGTCCGAAGCCCAATATACGAAAGTAGCTTTAATAAAGCCCACCTGACCCCACGAAAGCTGAGAAA	0	0	56	0	0	0	0	43	0	0	0	0	27	0	0	0	0	0	0	0	0	0	0	0	0	0	0	0	0	0	0	0	0	0	0	0	0	0	0	0
OTU_372	Chordata	Actinopteri	Anguilliformes	Anguillidae	Anguilla		96.407	Midori2	GCGGTTATACGAGAGGCTCAAATTGATATTACACGGCGTAAAGCGTGATTAAAAAACAAAACTAAAGCCAAACACTTCCCAAGCTCATACGCTACCGGAACATAAACGAAGCCCTATAACGAAAGTAGCTTTAACACCTTTGAACTCACGACAGTTGAGGAA	8957	206	113	238	129	133	359	94	188	108	43	512	228	76	335	225	172	100	170	54	130	12	113	121	202	104	183	181	121	69	94	143	283	265	101	44	192	170	0	0
OTU_373	Chordata	Actinopteri	Cypriniformes	Leuciscidae	Leuciscus	Leuciscus aspius	97.661	Midori2	GCGGTTATACGAGAGGCCCTAGTTAATAATACACGGCGTAAAGGGTGGTTAAGGAAAGCATAACAATAAAGTCGAATGGCCCCTTGGCTGTCATACGCCTAGGTGTCCGAAGCCCAATATACGAAAGTAGCTTTAATAATGCCCACCTGACCCCACGAAAGCTGAGGAA	0	10	0	29	0	0	0	0	0	22	23	31	0	0	61	42	0	10	33	13	0	0	0	41	22	44	0	26	0	0	12	20	0	4	16	67	13	3	0	0
OTU_374	Chordata	Actinopteri	Cypriniformes	Leuciscidae	Leuciscus	Leuciscus aspius	98.246	Midori2	GCGGTTAAACGGGAGGCCCTAGTTAATAATACACGGCGTAAAGGGTGGTTAAGGAAAGCATAACAATAAAGTCGAATGGCCCCTTGGCTGTCGTACGCTTCTAGGTGTCCGAAGCCCGATATACGAAAGTAGCTTTAATAAGGCCCACCTGACCCCACGAAAGCTGAGGAA	0	13	0	20	0	0	0	0	0	19	20	32	0	0	30	29	0	3	37	7	0	0	0	20	2284	35	0	10	0	0	3	6	0	1	10	19	6	5	0	0
OTU_375	Chordata	Actinopteri	Perciformes	Percidae	Perca	Perca fluviatilis	98.148	Midori2	GCTTTATACGAGAGGCCCAAGTTGACAAAAATCGGCGTAAAGCGTGGTTAAGATTAAAGACAATACTAAAGCCGAACACCTTCAGAGCTGTTATACGCATCCGAAGGTAAGAAGTTCAACCACGAAAGTGGCTTTATAGCCCCTGAACCCACGAAAGCTACGATA	441	491	207	249	176	266	306	305	312	192	219	272	332	326	378	491	390	272	258	215	34	160	228	185	285	215	379	252	294	207	310	323	414	368	336	348	237	254	0	0
OTU_376	Chordata	Mammalia	Rodentia	Myocastoridae	Myocastor		96.951	Midori2	GCGGTCATACGATTAACTCTAATTAATAAACCCCGGCGTAAAGAGTATTAAAGATACAATAAAAATAAGATTAAATTTCATCTGGGTCGTAAAAAACTATAGATAAAAAATCGATAACGAAGGTAATCTTAATATATCAGAATATACTAAAGCTAAGACA	6	2	12	5	2	0	0	4	0	11	19	3	9	5	3	4	0	0	0	7	0	0	5	1	0	3	14	0	1	7	1	10	1	3	1	2	1	7	0	0
OTU_377	Chordata	Actinopteri	Cypriniformes	Leuciscidae	Abramis	Abramis brama	97.59	Midori2	GCGGTTAAACGAGAGGCCCCAGTTAATAATACACGGCGTAAAGGGTGGTTAAGGAAAGTATTAACAATAAAGCCGAATGGCCCTTTGGCTGTCATACGCTTCTAGGTGTCCGAAGTTCAACAAAAGTAGCTTTAATAACGCCCACCTGACCCCACGAAAGCTACGATA	7	10	1	8	1	1	1	2	3	4	1	2	3	1	4	3	18	7	7	6	1	2	2	0	14	3	12	9	4	2	2	13	9	5	3	5	0	4	0	0
OTU_378	Chordata	Actinopteri	Perciformes	Percidae			92.683	Midori2	GCGGTTATACGAGAGGCCCAAGTTGACAAAAATCGGCGAAAAGCGTGGTTAAGATTAAAGACAATACTAAAGCCGAACACCTTCAGAGCTGTTATACGCATCCGAAGGTAAGAAGTTCAACCACGAAAGTGGCTTTAATTTTCATGAAGCCACGAAAGCTAGGAAA	37	46	18	24	12	19	26	33	25	17	16	32	34	43	34	41	37	19	35	16	1	15	23	18	16	18	36	20	34	19	13	27	32	25	31	23	16	10	0	0
OTU_379	Chordata	Actinopteri	Cypriniformes				95.266	Midori2	GCGGTTAGACGGCCCTAGTTGATATTATAACGGCGTAAAGGGTGGTTAGGGATAAATAATAATAAAGTCAAATGGCCCCTTGGCCGTCATACGCTTCTAGGAGTCCGAAGCCCTAATACGAAAGTAACTTTAATAAACCCACCTGACCCCACGAAAGCTGAGAAA	11	17	47	65	19	32	94	53	26	20	45	81	89	40	59	54	32	53	35	44	0	0	33	5	31	20	57	78	36	20	62	33	38	42	8	16	9	24	0	0
OTU_380	Chordata	Actinopteri	Perciformes	Percidae	Sander		96.97	Midori2	GCGGTTATACGAGAGGCCCAAGTTGATAGACATCGGCGTAAAGCGTGGTTAAGACAAAAACAAAACTAAAGCCGAACACCTTCAGAGCTGTTATACGCACCCGAAGGTAAGAAGTTCAACCACGAAAGTGGCTTTATAGCCCCTGAACCCAAAGCTACGATA	890	1698	290	530	103	80	454	365	451	216	411	428	271	139	189	758	1001	919	802	293	81	0	96	44	370	166	755	551	153	460	449	414	1097	282	552	573	272	168	0	1
OTU_381	Chordata	Actinopteri	Cypriniformes	Leuciscidae	Leuciscus	Leuciscus aspius	98.246	Midori2	GCGGTTAAACGAGGGGCCCTAGTTAGTAATACACGGCGTAAAGGGTGGTTAAGGAAAGCATAACAATAAAGTCGAATGGCCCCTTGGCTGTCATACGCTTCTAGGTGTCCGAAGCCCAATATACGAAAATAGCTTTAATAAGGCCCACCTGACCCCACGAAAGCTGAGGAA	0	7	0	22	0	0	0	0	0	19	19	79	0	0	45	17	0	4	1066	29	0	0	0	17	12	33	0	42	0	0	4	20	0	4	4	29	3	14	0	0
OTU_382	Chordata	Actinopteri	Gobiiformes	Gobiidae	Neogobius		96.933	Midori2	GCGGTTATACGAGAGGCCCAAGTTGACAAAAATCGGCGAAAAGCGTGGTTAGTGATAGTTCCACTAAAGCCAAACACCTTCAAGGCTGTTATACGCCCCCGAAGACAGGAAGACCCATCACGAAAGTAGCTTTAATCTTCATGAACCCACGAAAGCTAGGAAA	14	56	0	0	0	0	0	15	2	0	0	0	0	8	0	0	8	17	0	0	0	0	0	0	7	0	0	14	0	0	62	0	0	13	59	0	0	19	0	0
OTU_383	Chordata	Actinopteri	Gobiiformes	Gobiidae	Neogobius		96.988	Midori2	TCGGTTATACGAGAGGCCCAAGTTGACAAAAAATCTGCGAAAAGCGTGGTTAGTGATATCACCTCCACTAAAGCCAAACACCTTCAAGGCTGTAATACGCCCCCGAAGACAGGAAGCCCAATCAAAAGTAGCTTTAATTTTCATGAAGCCACGAGAGCTAGGAAA	1	3	1	3	0	1	2	2	4	0	2	1	0	0	1	0	2	1	1	1	0	0	1	1	2	2	1	1	2	0	0	0	1	0	1	1	0	2	0	0
OTU_384	Chordata	Actinopteri	Perciformes	Percidae	Perca	Perca fluviatilis	98.125	Midori2	GCGGTTATACGACGCCCAAGTTGATAGACATCGGCGTAAAGCGTGGTTAAGATTAAAGACAATACTAAAGCCGAACACCTTCAGAGCTGTTATACGCATCCGAAGGTAAGAAGTTCAACCACGAAAGTGGCTTTATAGCCCCTGAACCCACGAAAGCTGAGAAA	7	6	6	2	3	2	3	4	3	0	6	9	13	6	2	6	9	7	7	9	1	2	3	1	5	5	15	3	7	3	6	9	11	10	2	8	3	10	0	0
OTU_385	Chordata	Actinopteri	Gobiiformes	Gobiidae	Neogobius		96.951	Midori2	GCGGTTATACGAGAGGCCCAAGTTGACAAAAATCGGCGAAAAGCGTGGTTAGTGATATCACCTCCACTAAAGCCAAACACCTTCAAGGCTGTAATACGCCCCCGAACACAGGACCCCAATCACGAAAGTAGCTTTAATTTTCATGAACCCACGAAAGCTACGATA	8	6	1	3	1	6	6	4	3	1	3	7	4	3	2	7	6	5	3	2	0	4	3	1	7	6	5	6	3	3	3	3	3	3	5	2	1	3	0	0
OTU_386	Chordata	Actinopteri	Cypriniformes				96.45	Midori2	GCGGTTAACGAGAGGCCCTAGTTGATATTACAACGGCGTAAAGGGTGGTTAAGGATAAACAAAAATAAAGTCAAATGGCCCCCCGTCATACGCTTCTAGGAGTCCGAAGCCCTAATACGAAGGTAACTTTAATAAACCCACCTGACCCCACGAAAGCTGAGAAA	0	0	0	0	0	0	0	0	0	0	0	0	0	0	0	1	0	0	0	0	0	0	0	0	0	0	0	0	0	0	0	0	0	0	0	1	0	0	0	0
OTU_387	Chordata	Actinopteri	Cypriniformes	Leuciscidae	Leuciscus		96.512	Midori2	GCGGTTATACGAGAGGCCCAAGTTGACAATACACGGCGTAAAGGGTGGTTAAGGAAAGTATTAACAATAAAGCCGAATGGCCCTTTGGCTGTCATACGCTTCTAGGTGTCCGAAGCCCAATATACGAAAGTAGCTTTAATAAAGCCCACCTGACCCCACGAAAGCTGAGAAA	21	26	49	56	32	28	27	35	31	34	38	28	136	69	127	250	52	66	59	82	17	67	29	17	20	34	43	50	20	9	58	84	102	77	20	30	21	23	0	0
OTU_388	Chordata	Actinopteri	Cypriniformes	Leuciscidae	Squalius	Squalius cephalus	97.076	Midori2	GCGGTTATACGAGAGGCCCAAGTTAATAATACACGGCGTAAAGGGTGGTTAAGGAAAACATAACAATAAAGCAAATGGCCCTTTGGCTGTCATACGCTTCTAGGTGTCCGAAGCCCAATATACGAAAGTAGCTTTAATAAAGTCCACCTGACCCCACGAAAGCTGAGAAA	121	172	73	51	89	174	107	88	60	138	132	138	115	200	86	165	139	120	59	61	56	0	60	127	53	49	104	113	134	66	124	104	129	113	137	111	158	86	0	0
OTU_389	Chordata	Actinopteri	Cypriniformes				96.471	Midori2	GCGGTTAGACGAGAGGCCCTAGTTGATATTACAACGGCGTAAAGGGTGGTTAAGGATAAACAAAAATAAAGTCAAATGGCCCCTTGGCCGTCATACGCTTCTAGGAGTCCGAAGCCCTAATACGAAAGTAGCTTTAGTACCGCCCACCTGACCCCACGAAAACTGAGAAA	1	0	3	12	2	6	0	2	3	3	3	15	7	23	10	0	12	3	8	2	0	0	0	0	4	10	6	6	0	3	15	1	14	12	0	2	3	2	0	0
OTU_390	Chordata	Actinopteri	Perciformes	Percidae	Perca	Perca fluviatilis	100	Midori2	GCGTACGAGAGGCCCAAGTTGATAGACATCGGCGTAAAGCGTGGTTAAGATTAAAGACAATACTAAAGCCGAACACCTTCAGAGCTGTTATACGCATCCGAAGGTAAGAAGTTCAACCACGAAAGTGGCTTTATAGCCCCTGAACCCACGAAAGCTACGGCA	13	14	14	15	8	7	6	10	3	5	3	5	9	11	16	8	20	7	12	2	0	8	18	8	10	4	12	11	4	6	4	6	17	12	12	12	5	10	0	0
OTU_391	Chordata	Actinopteri	Cypriniformes	Leuciscidae	Leuciscus		96.491	Midori2	GCTGTTAAACGAGAGGCCCTAGTTAATAATACACGGCGTAAAGGGTGGTTAAGGAAAACATAACAATAAAGCCGAATGGCCCTTTGGCTTCATACGCTTCTGTGTCCGAAGCCCAATATACGAAAGTAGCTTTAATAACGCCCACCTGACCCCACGAAAGCTGAGAAA	2	6	10	8	9	15	5	10	4	13	14	7	6	18	3	11	6	6	10	10	8	0	6	7	2	5	19	9	7	6	15	9	18	11	11	9	2	3	0	0
OTU_392	Chordata	Actinopteri	Cypriniformes	Leuciscidae			97.093	Midori2	GCGGTTAGACGAGAGGCCCTAGTTGATATTACAACGGCGTAAAGGGTGGTTAAGGAAAGTATAACGATAAAGCCGAATGGCCCTTTGGCTGTCATACGCTTCTAGGTGTCCGAAGTCCAATATACGAAAGTAGCTTTAATAGAGCCCACCTGACCCCACGAAAGCTGAGAAA	3	0	15	4	14	2	19	2	0	4	0	5	10	22	9	3	6	3	1	6	2	0	2	1	4	7	2	1	0	0	4	3	15	8	0	1	2	5	0	0
OTU_393	Chordata	Actinopteri	Gobiiformes	Gobiidae	Ponticola		96.951	Midori2	GCGGTTATACGAGAGGCCCAAGTTGACAAACATTCGGCGTAAAGCGTGGTTAATAACTTACTAAAGCCAAACACCTTTAAGGCTGTTATACGCCCCCAAAGGTAGGAAGACCCCTCACGAAAGTAGCTTTAATTACTATGAATCCACGAAAGCTAGGAAA	199	246	333	532	59	77	165	114	83	363	204	99	166	218	135	215	170	397	284	162	187	0	296	284	154	158	191	85	104	146	331	120	249	227	266	214	172	278	0	0
OTU_394	Chordata	Actinopteri	Perciformes	Percidae	Perca	Perca fluviatilis	98.765	Midori2	GCTTTATACGAGGGGCCCAATTTGATAGACATCGGCGTAAAGCGTGGTTAAGATTAAAGACAATACTAAAGCCGAACACCTTCAGAGCTGTTATACGCATCCGAAGGTAAGAAGTTCAACCACGAAAGTGGCTTTATAGCCCCTGAACCCACGAAAGCTACGATA	4	4	1	3	1	2	3	23	3	1	0	3	3	3	6	13	3	6	3	2	1	4	2	3	1	3	2	4	0	3	3	0	3	0	2	5	5	5	0	0
OTU_395	Chordata	Actinopteri	Perciformes	Gasterosteidae	Gasterosteus		96.97	Midori2	GCGGTTATACGAGAGGCCCAAGTTGATGAATTACGGCGTAAAGAGTGGTTAAGCTAAAATTAAAACTAAAGCCGAACACCCCCAAAGCTGTTATACGCATCCGGAGGTGAGAAGTTCAACCACGAAGGTGGCTTTATCCAACCCCCCCACGAAAGCTACGGCA	2	1	10	3	4	6	1	2	0	5	3	0	4	3	2	7	1	2	1	6	0	4	1	7	1	3	4	4	6	7	2	4	3	2	3	2	8	16	4	0
OTU_396	Chordata	Actinopteri	Cypriniformes	Leuciscidae			96.532	Midori2	GCGGTTAAACGAGAGGCCCCAGTTAATAATACACGGCGTAAAGGGTGGTTAAGGAAAGTATTAACAATAAAGCCGAATGGCCCTTTTGGCTGTCATACGCTTAGGTGTCCGAAGCCCAATATACGAAAGTAGCTTTAATAAAGCCCACCTGACCCCACGAAAGCTGAGAAA	30	69	71	85	37	27	39	160	43	78	71	71	132	64	75	111	83	108	152	74	55	48	27	19	39	202	164	111	27	59	162	69	102	74	23	31	83	98	0	0
OTU_397	Chordata	Actinopteri	Perciformes	Percidae	Perca		96.988	Midori2	GCGGTTAAACGAGGCCCCAGTTAATAGACATCGGCGTAAAGCGTGGTTAAGATTAAAGACAATACTAAAGCCGAACACCTTCAGAGCTGTTATACGCATCCGAAGGTAAGAAGTTCAACCACGAAAGTGGCTTTATAGCCCCTGAACCCACGAAAGCTACGATA	288	297	188	246	197	221	215	346	230	183	190	188	352	326	379	496	401	237	364	326	68	190	236	166	338	242	431	320	238	203	467	317	466	439	238	319	219	265	0	0
OTU_398	Chordata	Actinopteri	Anguilliformes	Anguillidae	Anguilla		96.407	Midori2	GCGGTTATACGAGGGGCTCAAATTGATATTACACGGCGTAAAGCGTGATTaaaaaaaaaCTAAAGCCAAACACTTCCCAAGCTGTCATACGCTACCGGAACATAAACGAAGCCCTATAACGAAAGTAGCTTTAATACCTTTGAACTCACGACAGTTGAGGAA	18	34	4	33	15	12	47	9	12	10	4	81	25	6	25	15	15	12	19	5	18	6	10	14	20	9	15	14	12	9	11	41	24	26	4558	4	24	27	0	0
OTU_399	Chordata	Actinopteri	Perciformes	Percidae	Perca	Perca fluviatilis	98.125	Midori2	GCGGTTATACGAGAGGCCCAAGTTGATAGACATCGGCGTAAAGCGTGGTTAAGATTAAAGACAATACTAAAGCCCACCTTCAGAGCTGTTATACGCATCCGAAGGTAAGAAGTTCAACCACGAAAGTGGCTTTATAGCCCCTGAACCCACGAAAGCTGAGAAA	4	7	0	9	4	6	4	2	3	1	4	5	9	9	4	10	8	6	5	5	4	3	1	2	3	7	4	8	4	1	4	5	11	5	4	5	2	0	0	0
OTU_400	Chordata	Actinopteri	Gobiiformes	Gobiidae	Neogobius		96.988	Midori2	GCGGTTATACGATAGGCCCAAGTTGACAAAAATCGGCGAAAGGCGTGGTTACTGATATCACCTCCACTAAAGCCAAACACCTTCAAGGCTGTAATACGCCCCCGAAGACAGGAAGCCCAATCACGAAAGTATCTTTAATTTTCATGAAGCCACAAAAGCTAGGAAA	0	0	0	0	0	0	0	0	0	0	0	0	0	0	0	0	0	0	0	0	0	0	0	0	0	0	0	0	0	0	0	0	0	0	0	0	0	0	0	0
OTU_401	Chordata	Actinopteri	Gobiiformes	Gobiidae	Neogobius	Neogobius melanostomus	97.576	Midori2	TCGGTTATACGAGAGGCCCAAGTTGACAAAAATCGGAAAAAGCGTGGTTAGTGATATCACCTCCACTAAAGCCAAGCACCTTCAAGGCTGTAATACGCCCCCGAAGACAGGAAGCCCAATCACGAAAGTAGCTTTAATTTTCATGAATCCACGAAAGCTAGGAAA	2	0	2	1	1	2	1	1	0	1	2	0	0	0	0	3	0	1	0	0	0	0	1	1	1	0	1	2	0	0	0	0	1	0	0	0	1	0	0	0
OTU_402	No Match	No Match	No Match	No Match	No Match	No Match	No Match	Midori2	GCATTTGGGCTAGCTTCAAATATAGCTTATGAATGGACAGTAAAAGCAGTTACTTCTTGCAATGGAAGCACATCTTCATACCCGACTGTGATTGACTTTACTACAATTAATCTCACTCCATTAATGACCTGGGACGGAAGCTCAAGTACAGCATGGGGAACTGCCG	0	0	0	0	0	0	0	0	0	0	0	0	0	0	0	0	0	0	0	0	149	0	0	0	0	0	0	0	0	0	0	0	0	0	0	0	0	0	0	0
OTU_403	Chordata	Actinopteri	Gobiiformes	Gobiidae	Neogobius	Neogobius melanostomus	98.75	Midori2	GCGGTTATACGAGAGGCCCAAGTTGACAAAAATCGGCAAAAAGCGTGGTTAGTGATATCACCTCCACTAAAGCCAAACACCTTCAAGGCTGTAATACGCCCCCGAAGACGGAAGCCCAATCACGAAAGTAGCTTTAATTTTCATGAAGCCACGAAAGCTGAAA	5	7	3	9	5	4	7	5	1	7	7	3	2	10	6	5	5	10	2	3	4	8	2	5	0	5	6	1	8	1	4	9	11	2	5	3	1	1	0	1
OTU_404	Chordata	Actinopteri	Perciformes	Percidae	Perca		96.951	Midori2	GCGGTTATACGAGAGGCCCAAGTTGATAGACATCGGCGGCGTGGTTAAGATTAAAGACAATACTAAAGCCGAACACCTTCAGAGCTGTTATACGCATCCGAAGGTAAGAAGTTCAACCACGAAAGTGGCTTTATAGCCCCTGAACCCACGAAAGCTAGGAAA	16	20	5	8	1	4	4	9	11	6	7	18	7	9	20	8	4	6	5	1	3	3	7	3	8	4	4	4	7	4	6	4	9	12	11	7	6	11	0	0
OTU_405	Chordata	Mammalia	Rodentia	Cricetidae	Microtus	Microtus arvalis	98.742	Midori2	GCGGTCATACGATTAACCCAAACTAATTATTCTCCGCGTAAAACGTGTTACTAGAAATATGCAAAATAGAATTAAAATCCATCCAATATGTGAAAATTCATCGCTGGACCTAAAACCAATGACGAAAGTAATTCTAATAAGCCTGATACACGAAAGCTAGGAAA	0	0	0	0	24	11	0	35	58	97	56	0	0	0	0	2	1	0	18	14	0	0	0	0	0	0	0	0	0	0	10	0	0	0	0	5	0	1	0	0
OTU_406	Chordata	Actinopteri	Cypriniformes	Leuciscidae			96.512	Midori2	GCGTTTAAACGAGAGGCCCCAGTTAATAATACACGGCGTAAAGGGTGGTTAAGGAAAGTATTAACAAAAGCCGAATGGCCCTTTGGCTGTCATACGCTTCTAGGTGTCCGAAGCCCAATATACGAAAGTAGCTTTAATAAAGCCCACCTGACCCCACGAAAGCTGAGAAA	32	53	56	64	59	43	58	57	36	87	37	59	82	110	63	102	64	101	85	98	46	51	29	35	31	89	100	63	24	41	78	63	191	106	27	54	33	54	0	0
OTU_407	Chordata	Actinopteri	Gobiiformes	Gobiidae	Neogobius	Neogobius melanostomus	98.758	Midori2	TCGGTTATACGAGAGGCCCAAGTTGACAAAAATCGGCGAAAAGCGTGGTTAGTGATATCACCTCCACTAAAGCAAAACACCTTCAAGGCTGTAATACGCCCCCGAAGACAGGAAGCCCAATCACGAAAGTAGCTTTAATTTTCATGAAGCCACGAGAGCTAGTAGA	0	2	1	1	1	1	2	0	0	0	5	1	1	0	0	6	2	1	1	3	0	4	1	2	0	1	1	3	0	3	6	0	2	2	3	2	4	0	0	0
OTU_408	Chordata	Actinopteri	Pleuronectiformes	Pleuronectidae	Platichthys	Platichthys flesus	98.75	manual check	GCGGTTATACGAGAGGCCCAAGTTGAAAACAACGGCGTAAAGAGTGGTTAGGGGTTTTACTAAACTAGAGCCGAACGCTTTCAAAGCTGTTATACGCACCCGAAAGTATGAAACCCAATTACGAAAGTAGCTCTACCTATCCTGAACCCACGAAAGCTACGATA	0	0	0	0	0	0	0	0	0	0	0	0	0	0	0	0	0	0	0	1	0	0	0	0	0	0	0	0	0	1	0	0	0	0	0	0	0	0	0	0
OTU_409	Chordata	Actinopteri	Gobiiformes	Gobiidae	Neogobius	Neogobius melanostomus	97.561	Midori2	GCGGTTATACGAGAGGCCCAAGTTGACAAAAATCGGCGAAAAGCGTGGTTAGTGATATCACCTCCACTAAAGCCAAACACCTTCAACTGTAATACGCCCCCGAAGACAGGAAGCCCAATCACGAAAGTAGCTTTAATTTTCATGAATCCACGAAAGCTACGATA	6	4	1	3	1	2	1	1	2	0	0	1	1	4	0	2	2	1	0	0	0	3	4	2	0	3	2	7	0	3	2	3	1	3	3	2	2	1	0	0
OTU_410	Chordata	Actinopteri	Gobiiformes	Gobiidae	Neogobius		96.988	Midori2	GCGGTTATACGAGAGGCCCAAGTTGACAAAAATCGGCGAAAATCGTGGTTAGTGATATCACCTCCACTAAAGCCAAACACCTTCAAGGCTGTAATACGCCCCCGAAGACTGAAGCCCAATCACGAAAGTAGCTTTAATTTTCATAAGCCACGAAACTAGGAAA	0	0	0	0	0	0	0	0	0	0	0	0	0	0	0	0	0	0	0	0	0	0	0	0	0	0	0	0	0	0	0	0	0	0	0	0	0	0	0	0
OTU_411	Chordata	Actinopteri	Gobiiformes	Gobiidae	Neogobius	Neogobius melanostomus	97.516	Midori2	GCGGTTATACGAGAGGCCCAAGTTGACAAAAATCGGCGAAAAGCGTGGTTAGTGATATCACCTCCACTAAAGCCAAACACCTTCAAGGCTGTAATACGCCCCCGAAGACAGGAAGCCCAATCAAAAGTACCTTTAATTTTCATAAGCCACGAAAGCTAAAA	0	0	0	0	0	0	0	0	0	0	0	0	0	0	0	0	0	0	0	0	0	0	0	0	0	0	0	0	0	0	0	0	0	0	0	0	0	0	0	0
OTU_412	Chordata	Actinopteri	Gobiiformes	Gobiidae	Neogobius		96.988	Midori2	GCGGTTATACGAGGGGCCCAAGTTGACAAAAATCGGCGAGAAGCGTGGTTAGTGATATCACCTCCACTAAAGCCAAATACCTTCAAGGCTGTAATATGCCCCCGAAGACAGGAAGCCCAATTACGAAAGTAGCTTTAATTTTCATGAAGCCACGAAAGCTAGGAAA	0	0	0	0	0	0	0	0	0	0	0	0	0	0	0	0	0	0	0	0	0	0	0	0	0	0	0	0	0	0	0	0	0	0	0	0	0	0	0	0
OTU_413	Chordata	Actinopteri	Perciformes	Percidae	Sander		96.97	Midori2	GCGGTTATACGAGAGGCCCAAGTTGACAAAAATCGGCGTAAAGCGTGGTTAAGACAAAAACAAAACTAAAGCCGAACACCTTCAGAGCTGTTATACGCACCCGAAGGTAAGAAGTTCAACCACGAATTGGCTTTATTACCCCTGAACCCACGAAAGCTACGATA	30	70	29	45	25	19	40	32	58	36	44	26	14	13	20	80	46	70	45	24	20	0	4	7	27	13	59	50	23	38	55	63	78	16	51	59	36	28	0	0
OTU_414	Chordata	Actinopteri	Cypriniformes	Cyprinidae	Capoeta		95.906	Midori2	GCGGTTAGACGATAGGCCCTAGTTGATATTATAACGGCGTAAAGGGTGGTTAGTATAAATAATAATAAAGCCAAATGGCCCCTTGGCCGTCATACGCTTCTAGGTGTCCGAGGCCCTATATACGAAAGTAGCTTTAATAACGCCCACCTGACCCCACGAAAGCTGAGAAA	5	3	9	8	1	5	10	11	4	2	14	7	3	8	11	9	9	2	6	6	0	1	16	20	12	7	18	33	7	10	21	4	3	11	9	2	3	5	0	0
OTU_415	Chordata	Actinopteri	Perciformes	Percidae	Perca		96.386	Midori2	GCGGTTATACGAGAGGCCCAAGTTGATAGACATCGGCGTAAAGCGTGGTTAAGATTAAAGACAATACTAAAGCCGAACACCCCCAAAGCTGTTATACGCACCCGAAGGTAAGAAGTTCAACCACGAAAGTGGCTTTATTACCCCTGAACCCACGAAAGCTACGATA	14	35	16	15	2	0	5	9	10	8	16	17	2	3	4	10	21	27	14	8	3	0	2	1	3	7	19	8	2	16	11	5	12	1	7	16	0	5	0	0
OTU_416	Chordata	Actinopteri	Gobiiformes	Gobiidae	Neogobius	Neogobius melanostomus	97.561	Midori2	GCGGTTATACGACAGGCCCAAGTTGACAAAAATCGGCGAAAAGCGCGGTTAGTGATATCACCTCCACTAAAGCCAAACACCTTCAAGGCTGTAATACGCCCCCGAAGACAGGAAGCCCAATCACGAAAGTAGCTTTAATTTTCATGAAGCCAAAAGCTAGGAGA	0	0	0	0	0	0	1	0	0	0	0	0	0	0	0	0	0	0	0	0	0	0	0	0	0	0	1	0	0	0	0	0	0	1	0	0	0	0	0	1
OTU_417	Chordata	Actinopteri	Cypriniformes	Leuciscidae	Leuciscus		96.512	Midori2	GCGGTTAAACGAGAGGCCCCAGTTAATAATACACGGCGTAAAGGGTGGTTAAGGAAAGTATTAACAATAAAGCCGAATGCCCCTTTGGCTGTCATACGCTTCTAGGTGTCCGAAGCCCAATATACGAAAGTAGCTTTAATAAAGCCCACCTGCCCCACGGAAGCTGAGAAA	3	2	1	0	1	2	5	1	1	2	2	1	4	8	0	8	1	5	7	5	1	2	0	1	1	10	3	1	1	0	4	5	8	5	2	0	1	2	0	0
OTU_418	Chordata	Actinopteri	Perciformes	Percidae	Perca	Perca fluviatilis	98.125	Midori2	GCGGTTATACGAGAGGCCCAAGTTGATAGACATCGGCGTAAAGCGTGGTTAAGATTAAAGACAATAAAGCCGAACACCTTCAGAGCTGTTATACGCATCCGAAGGTAAGAAGTTCAACCACGAAAGTGGCTTTATAGCCCCTGAACCCACGAAAGCTGAGAAA	4	7	3	5	1	7	3	2	10	9	3	8	16	9	14	8	11	9	8	11	2	2	4	3	6	8	8	2	8	3	7	10	16	16	11	4	3	4	0	0
OTU_419	No Match	No Match	No Match	No Match	No Match	No Match	No Match	Midori2	CAACAGCTCTTTCCTGCCATGACCCAAAATGCAGATGCCTCAGCTGAATCCTTGGTAGGCACCTTGGGATTGGCCAACATTACTGACACTTCTTTTATCGATGGATTGGTACAAACGGTATTGGCGGAATTTCCCGACAAGGTTACCGAATACAGAGCGGG	0	0	0	8	32	0	6	0	2	1	1	2	0	20	0	2	25	9	0	2	3	2	5	3	4	12	4	1	2	0	5	0	6	7	0	2	0	1	0	0
OTU_420	Chordata	Actinopteri	Cypriniformes				96.45	Midori2	GCGGTTAGACGAGAGGCCCTAGTTGATATTACAACGGCGTAAAGGGTGGTTAAGGATAAAAATAAAGTCAAATGGCCCCTTGGCCGTCATACGCTTCTAGGAGTCCGAAGCCCTAATACGAAAGTAACTTTAATAAACCCACCTGACCCCACGAAAGCTAGGAAA	2	7	12	9	17	21	15	9	7	20	9	41	14	21	27	11	19	31	7	16	1	0	10	3	4	12	11	6	3	2	38	3	10	11	5	14	8	2	0	0
OTU_421	Chordata	Actinopteri	Anguilliformes	Anguillidae	Anguilla		96.429	Midori2	GCGGTTATACGAGGGGCTCAAATTGATATTACACGGCGTAAAGCGTGATTaaaaaacaaaaaaaaCTAAAGCCAAACACTTCCCTGTCATACGCTGCCGGAACATAAACGAAGCCCTATAACGAAAGTAGCTTTAACACCTTTGAACTCACGACAGTTGAGGAA	4	0	0	1	0	0	1	0	1	0	0	2	1	0	4	2	1	0	0	0	1	0	0	0	2	0	2	0	1	0	0	0	0	2	0	0	0	0	0	0
OTU_422	Chordata	Mammalia					82.911	Midori2	ACACGATTAACCCGAGCTAATGGAACTCAGCGTAAAGAGTGTTTAAGGTCTGCCCTCAATAAAGTTAAAGCCCATCTAAGTTGTAAAAAACTCCAGCTGAAATAAAATGTACTACAAAAGTAGCTTTAATACCCTGAAGACACAATAGCTAAGACCC	0	0	0	0	0	0	0	0	0	0	0	0	0	0	0	0	0	0	29	0	0	0	88	99	0	0	0	0	0	0	56	0	0	0	17	0	0	0	0	0
OTU_423	Chordata	Actinopteri	Cypriniformes	Leuciscidae	Leuciscus		95.93	Midori2	GCGGTTAGACGAGAGGCCCTAGTTGATATTACAACGGCGTAAAGGGTGGTTAAGGAGAGCATAACAAAAAGCCGAATGGCCCTTTGGCTGTCATACGCTTCTAGGTGTCCGAAGCCCAATATAAAAGTAGCTTTAATAAAGCCCACCTGACCCCACGAAAGCTGAGAAA	9	0	19	41	26	13	29	17	13	3	13	21	150	64	172	121	77	43	56	57	3	0	0	1	1	12	12	24	1	0	37	17	50	47	0	16	18	5	0	0
OTU_424	No Match	No Match	No Match	No Match	No Match	No Match	No Match	Midori2	CTCACACACAGACACACAGCCTCACCAGGCCCCCTTCCGCATGCATGGCCCGTGACAAGCAACGGCTGGCCCTTAGCAGCAGCAGGGCAACCAGAAGTCTGCCCGGTGCATCTGCGCCCTAGTTCAGCGCCGAGCATGCTTCAGTGCATCACGCATGCATACT	0	0	0	0	0	0	0	0	0	0	0	0	0	0	116	0	0	0	0	0	0	0	0	0	0	0	0	0	0	0	0	0	0	0	0	0	0	0	0	0
OTU_425	Chordata	Actinopteri	Gobiiformes	Gobiidae	Neogobius	Neogobius melanostomus	98.765	Midori2	GCGGTTATACGAGAGGCCCAAGTTGACAAAAATCGGCGAAAAGCGTGGTTAGTGATATCACCTCCACTAAGGCCAAACACCTTCAAGGCTGTAATACGCCCCCGAAGACAGGAAGCCCAATCACGAAAGTAGCTTTAATTTTCATGAAGCCACGAAAGCCAGCCAC	2834	3350	3100	3046	3637	4104	3340	2509	2955	3762	3962	3470	2169	2671	3466	3325	2983	3987	3715	2377	2619	3165	2284	2476	2591	2312	3039	2667	3628	3404	3367	2965	4168	3459	2783	2450	2614	3438	0	1202
OTU_426	Chordata	Actinopteri	Perciformes	Percidae	Perca		96.988	Midori2	GCGGTTATACGAGAGGCCCAAGTTGATAGACATCGGCGTAAAGCGTGGTTAAGATTAAAGACAATACTAAAGCCGAACACCTTCAGAGCTGTTATATGCATCCGAAGGTAAGAAGTTTAATTACGAAAGTGGCTTTATAGCCCCCGAACCCACGAAAGCTACGATA	3	6	2	3	0	1	2	0	0	1	5	2	2	3	1	0	10	2	0	0	1	1	0	2	2	0	0	1	1	0	1	2	2	2	2	0	1	0	0	0
OTU_427	Chordata	Actinopteri	Perciformes	Percidae	Perca		96.988	Midori2	GCGGTTATACGAGAGGCCCAAGTTGATAGACATCGGCGTAAAGCGTGGTTAAGACAAAAACAATACTAAAGCCGAACACCTTCAGCTGTTATACGCATCCGAAGGTAAGAAGTTCAACCACGAAAGTGGCTTTATAGCCCCTGAACCCACGAAAGCTACGATA	36	101	12	35	6	9	39	32	21	29	24	33	7	3	10	39	58	56	44	15	5	0	5	4	19	13	37	25	19	32	34	24	77	17	20	21	12	11	0	0
OTU_428	Chordata	Actinopteri	Gobiiformes	Gobiidae	Neogobius	Neogobius melanostomus	97.531	Midori2	GCTTTATACGAGAGGCCCAAGTTGACAAAAATCGGCGAAAAGCGTGGTTAGTGATATCACCTCCACTAAAGCCAAACACCTTCAAGGCTGTAATACGCCCCCGAAGACAGGAAGCCCAATCACGAAAGTAGCTTTAATTACTATGAATCCACGAAAGCTAGGAAA	151	189	371	609	64	54	172	96	99	381	190	103	172	214	134	259	162	408	301	199	92	0	376	285	183	181	156	77	93	148	313	119	210	241	235	249	190	226	0	0
OTU_429	No Match	No Match	No Match	No Match	No Match	No Match	No Match	Midori2	TACGAAGAAATCTGTGCCGCCATGAAGGCTGCACCAGAAGGCTCGCTGAAGGGCGTTCTGGCCTACACCAACGACAAGGTGGTCTCCACCGACTTCGTCGGCGAAAGCAACACCTGCGTGTTTGATGCAGAAGCCGGCATCGCTCTCGACAGCACCTTTGT	0	0	0	0	0	0	0	0	0	0	0	0	0	0	0	1	0	0	0	2	0	0	0	0	0	2	0	2	0	0	1	0	0	0	0	0	106	0	0	0
OTU_430	Chordata	Actinopteri	Cypriniformes	Leuciscidae	Rutilus	Rutilus rutilus	97.661	Midori2	GCGGTTAAACGAGAGGCCCCAGTTAATAATACACGGCGTAAAGGGTGGTTAAGGGAAGCACAATAATAAAGCCAAATCAACCTTTGGCTGTCATACGCTTCTAGGTGTCCGAAGCCCAATATACGAAAGTAGCTTTAATAAAGCCCACCTGACCCCACGAAAGCTGAGAAA	16	13	2	15	2	10	7	9	12	18	14	29	18	12	12	13	15	16	11	23	0	15	2	21	12	17	11	7	5	3	11	15	46	9	6	3	9	12	0	0
OTU_431	No Match	No Match	No Match	No Match	No Match	No Match	No Match	Midori2	GGCGTTTACAACTTAATTACAAGTATTAGTGCAGCTATCTACGACTTTGAGACCGATACTGCTGGTAGTAACCCAAACAGCACTTATTGGACTTCTGCTGGTTCACCTACAGTCAAAGACTATACTACTATTGATGCAGCCCTAGCAGGTGGCGAAAAGATTGCAAACTACCCAACA	0	0	0	0	0	0	0	0	0	0	0	0	0	0	0	0	0	0	0	111	0	0	0	0	0	0	0	0	0	0	0	0	0	0	0	0	0	0	0	0
OTU_432	Chordata	Actinopteri	Cypriniformes	Leuciscidae	Leuciscus		95.322	Midori2	GCGGTTAAACGCAGGCCCTAGTTAATAATACACGGCTTAAAGGGTGGTTAAGGAAAACATAACAATAAAGCCGAATGGCCCTTTGGCTGTCATACGCTTCTAGGTGTCCGAAGCCCAATATACGAAAGTAGCTTTAATTAACCCGCCTGACCCCACGAAAACTGAGAAA	36	33	74	39	14	11	79	70	34	29	108	56	96	86	59	123	85	54	42	74	0	15	107	160	29	20	58	120	37	18	87	64	44	56	45	35	47	33	0	0
OTU_433	Chordata	Actinopteri	Cypriniformes				95.882	Midori2	GCGGTTAGACGAGAGGCCCTAGTTGATATTACAACGGCGTAAAGGGTGGTTAAGGATAAAAATAAAGTCAAATGGCCCCTTGGCCGTCATACGCTTCTAGGAGTCCGAAGCCCTAATACGAAAGTAGCTTTAATAACGCCCACCTGACCCCACGAAAGCTGAGAAA	4	11	9	5	9	8	3	4	7	12	5	3	17	10	4	6	2	8	12	4	1	0	5	9	6	4	2	5	7	5	23	6	14	12	5	5	8	6	0	0
OTU_434	Chordata	Actinopteri	Cypriniformes				95.266	Midori2	GCGGTTAAACGAGAGGCCCTAGTTAATAATACACGGCGTAAAGGGTGGTTAAGGATAAACAAAAATAAAGTCAAATGGCCCCCCGTCATACGCTTCTAGGAGTCCGAAGCCCTAATACGAAAGTAACTTTAATAAACCCACCTGACCCCACGAAAGCTGAGAAA	0	4	0	2	2	2	4	0	3	3	3	8	7	11	6	7	3	11	7	5	0	0	1	1	0	3	1	0	0	4	2	2	8	5	1	3	5	1	0	0
OTU_435	Chordata	Actinopteri	Gobiiformes	Gobiidae	Neogobius		96.988	Midori2	GCGGTTATACGAGAGGCCCAAGTTGACAAAAATCGGCGAAAAGCGTGGTTAGTGATATCACCTCCACTAAAGCCAAACACCTTCAAGGCTGTAATACGCCCCCGAAGACAGGAAGCCCAATCACGAAAGTAGCTTTAATTTTCATGACCCCACGAAAACTGAGAAA	49	56	46	66	61	81	59	53	62	73	85	97	70	82	98	108	76	71	82	61	28	50	57	108	60	60	111	85	67	59	106	52	106	87	51	64	60	99	0	6
OTU_436	Chordata	Actinopteri	Perciformes	Percidae	Perca	Perca fluviatilis	98.125	Midori2	GCTGTTATACGAGAGGCCCAAGTTGATAGACATCCGCGTAAAGCGTGGTTAAGATTAAACACAATACTAAAGCCGAACACCTTCAGAGCTGTTATACGCATCCGAAGGTAAGAAGTTCAACCACGAAAGTGGCTTTATAGCCCCTGAACCCACGAAAGCTGAGAAA	0	1	0	0	0	0	0	0	0	0	0	0	0	0	0	0	0	1	0	0	0	0	0	0	0	0	0	0	0	1	0	0	0	0	0	0	0	0	0	0
OTU_437	Chordata	Actinopteri	Cypriniformes	Leuciscidae	Squalius		95.906	Midori2	GCGGTTAAACGAGAGGCCCTAGTTAATAATACACGGCGTAAAGGGTGGTTAAGGAAAACATAACAATAAAGCCGAATGGCCCTTTGGCTGTCATACGCTTCTAGGTGTCCGAAGCCCAATATACGAAAGTAGCTTTAACAAAATTTGCCTGACCCCACGAAAGCTAAGGAA	1	0	0	150	0	7	1	0	0	3	2	2	0	2	2	1	1	0	0	1	1	0	0	4	0	1	0	2	2	2	5	2	0	2	1	75	4	0	0	0
OTU_438	Chordata	Actinopteri	Cypriniformes	Leuciscidae			94.767	Midori2	GCGGTTAAACGAGAGGCCCCAGTTAATAATACACGGCGTAAAGGGTGGTTAGGGATAAATAATAATAAAGCCAAATGGCCCCTTGGCCGTCATACGCTTCTAGGTGTCCGAAGTTCAACATACGAAAGTAGCTTTAATAACGCCCACCTGACCCCACGAAAGCTGAGAAA	3	0	7	7	2	2	8	14	3	4	4	2	9	5	7	8	5	2	7	5	0	0	6	6	5	0	10	16	3	1	17	7	9	11	3	4	4	5	0	0
OTU_439	No Match	No Match	No Match	No Match	No Match	No Match	No Match	Midori2	TCCCTCACACACACATGCGTGGACATCCCGTGCATGCACGAACTCAATACAGCGAGGCGACGCCGAGGTGTTTGGCTGCGCCCATTTTTTACGCGTCAGGGGACGCGCCCTTCCTTGTCTCTAGTAGCTAGCACACGGGTCCGCATTCGACCTGAGACTTGACGCT	0	1	0	0	0	0	0	0	0	0	0	0	1	0	0	0	0	0	0	1	6	55	3	8	8	1	3	0	0	0	0	0	0	0	0	0	0	19	0	0
OTU_440	Chordata	Actinopteri	Cypriniformes	Cyprinidae			96.45	Midori2	CCGGTTAGACGAGAGGCCCTAGTTGATATTATAACGGCGTAAAGGGTGGTTAGGGATAAATAATAATAAAGCCAAATGGCCCCTTGCCGTCATACGCTTCTAGGTGTCCGAGGCCCTATATACGAAAGTAGCTTTAATTAACCCTGACCCCACGAAAGCTGAGAAA	26	45	97	73	31	9	99	75	55	32	87	44	83	43	67	91	61	59	37	70	0	54	87	113	55	34	56	106	42	33	125	53	34	71	33	42	42	52	0	0
OTU_441	Chordata	Actinopteri	Perciformes	Percidae	Perca		96.988	Midori2	GCGGTTATACGACGCCCAAGTTGATAGACATCGGCGTAAAGCGTGGTTAAGATTAAAGACAATACTAAAGCCGAACACCTTCAGAGCTGTTATACGCATCCGAAGGTAAGAAGTTCAACCACGAAAGTGGCTTTATTACCCCTGAACCCACGAAAGCTACGATA	13	16	4	10	1	0	6	9	10	2	4	7	4	4	3	12	8	14	10	9	1	0	1	1	4	0	13	9	1	7	4	9	10	2	9	15	5	5	0	0
OTU_442	Chordata	Actinopteri	Cypriniformes	Leuciscidae	Leuciscus		95.906	Midori2	GCGGTTAAACGAGAGGCCCTAGTTAATAATACACGGCGTAAAGGGGTTAAGGAGAGCATAACAATAAAGCCAAATGGCCCTTTGGCTGTCATACGCTTCTAGGTGTCCGAAGTTCAACATACGAAAGTAGCTTTAATAACGCCCACCTGACCCCACGAAAGCTGAGAAA	4	0	6	9	3	15	2	4	4	8	2	7	80	100	210	167	9	13	141	90	1	5	2	4	2	0	5	5	2	1	4	4	11	6	2	4	3	11	0	0
OTU_443	Chlorophyta	Trebouxiophyceae	Chlorellales	Chlorellaceae	Chlorella		100	Midori2	GCGGTAATACGAGAGGGGCAAGCGTTATTCGGAATGATTGGGCGTAAAGAGCACGTAAGCGGAATTCTTGGTGGAGCAGTGAAATGCGTAGATATCAAGAGGAACACCAACGGCGAAGGCAATCCCCTGGACCTGTACTGACGCTCATGCACGAAAGCGTGGGGAG	0	0	0	0	0	0	0	0	0	0	0	0	0	0	0	0	0	0	0	0	0	0	0	0	0	0	0	0	0	0	0	0	0	0	0	0	0	0	0	0
OTU_444	No Match	No Match	No Match	No Match	No Match	No Match	No Match	Midori2	CCACCCCACTCCAACGGCCACTGAATTCAATGCAGACGGGGCCTGAGAGCGACCGTTTGACCCAGAACAAAGGAATGCCACAACAACTTGGTTTCAGGCCCAAACGTTCGGGCACGAACGGCCTTGCCCAACCTACTACATTTCACGACTGGAAACGTCACGTCCCTGCATCG	0	0	0	0	0	0	0	0	0	0	0	0	0	0	0	0	0	0	0	0	0	0	0	0	0	0	0	0	0	0	0	0	0	0	104	0	0	0	0	0
OTU_445	Chordata	Actinopteri	Cypriniformes	Leuciscidae	Abramis	Abramis brama	97.633	Midori2	GCGTTAAACGAGAGGCCCCAGTTAATAATACACGGCGTAAAGTGTGGTTAAGGAAAGTATTAACAATAAAGCCGAATGGCCCTTTGCTGTCATACGCTTCTAGGTGTCCGAAGTTCAACATACGAAAGTAGCTTTAATAACGCCCACCTGACCCCACGAAAGCTAGGAAA	1	0	1	0	2	0	0	0	0	0	1	0	0	0	0	0	0	1	2	0	0	1	0	0	0	1	0	0	1	0	2	0	0	0	0	1	0	0	0	0
OTU_446	Chordata	Actinopteri	Gobiiformes	Gobiidae	Neogobius		96.988	Midori2	GCGGTTATACGAGAGGCCCAAGTTGACAAAAATCGGCGAAAAGCGTGGTTAGATATCACCTCCACTAAAGCCAAACACCTTCAACGCTGTAATACGCCCCCGAAGACAGGAAGCCCAATCACGAAAGTAGCTTTAATTTTCATGAAGCCACGAAAGCTGAGAAA	0	1	1	1	0	0	0	1	0	0	0	0	0	1	3	1	0	0	0	0	1	1	3	0	0	0	1	1	0	0	2	0	0	0	0	0	1	0	0	1
OTU_447	Chordata	Actinopteri	Siluriformes	Siluridae	Silurus	Silurus glanis	97.561	Midori2	GCGGTTATACGAAAAACCCTAGTTAATAGCCACGGCGTAAAGGTGGTTAAGGAATATAACAAATAAAGCTAAAGACCCTCTAAGCCGTTATACGCACTCCGAGGACACGAAGCCCAAACACGAAAGTAGCTTTAAACCCCTCCTGACTCCACGAAAGCTACGATA	0	3	0	2	1	1	12	0	0	0	0	1	0	2	1	2	0	2	1	1	0	0	0	0	1	1	0	0	0	0	3	4	0	7	0	5	0	0	0	0
OTU_448	No Match	No Match	No Match	No Match	No Match	No Match	No Match	Midori2	ATAATCCATCCCTGCACCTCCCGCGCGCGATACTCCTCGCATATTTACTTCTGCTGCTCCCCAATGCTGCTGGTGCTAAACTGCCACTGGTGCTGCCCCGGCATTGTGACGGATGGGAAGTCGAATGACTCCGGCACCATGTAGCGGGAGACCTTTG	0	0	0	0	0	0	0	0	0	0	0	0	0	0	0	0	0	0	0	0	0	0	0	0	90	0	0	0	0	0	0	0	0	0	0	0	0	0	0	0
OTU_449	Chordata	Actinopteri	Perciformes	Percidae	Perca		96.988	Midori2	GCGGTTATACGAGAGGCCCAAGTTGATAGACATCGGCGTAAAGCGTGGTTAAGATTAAAGACAATAAAGCCGAACACCTTCAGAGCTGTTATACGCATCCGAAGGTAAGAAGTTCAACCACGAAAGTGGCTTTATTACCCCTGAACCCACGAAAGCTACGATA	15	21	5	10	1	0	14	6	6	9	10	13	2	4	1	20	21	13	11	5	1	0	3	5	68	3	17	47	2	8	6	6	11	8	7	9	7	1	0	0
OTU_450	Chordata	Actinopteri	Gobiiformes	Gobiidae	Neogobius		96.988	Midori2	GCGGTTATACGAGAGGCCCAAGTTGACAAAAATCGGCGAAAAGCTTAGTGATATCACCTCCACTAAAGCCAAACACCTTCAAGGCTGTAATACGCCCCCGAAGACAGGAAGCCCAATCACGAAAGTAGCTTTAATTTTCATGGAGCCACGAAAGCTAGGAAA	3	2	12	3	19	11	7	4	5	16	4	11	5	5	2	13	12	20	4	6	12	6	8	43	8	4	6	4	5	19	11	6	12	8	24	16	10	12	0	3
OTU_451	Chordata	Actinopteri	Gobiiformes	Gobiidae	Neogobius	Neogobius melanostomus	98.16	Midori2	GCGTTATACGAGAGGCCCAAGTTGACAAAAATCGGCGAAAAGCGTGGTTAGTGATATCACCTCCACTAAAGCCAAACACCTTCAAGGCTGTAATACGCCCCCGAAGACATGAAGCCCAATCACGAAAGTCTTTAATTTTCATGAAGCCACGAAAGCTAGGAAA	0	0	0	0	0	0	0	0	0	0	0	0	0	1	1	0	0	0	0	0	1	1	0	1	1	0	0	0	0	0	0	0	0	1	0	0	0	0	0	0
OTU_452	Chordata	Actinopteri	Perciformes	Gasterosteidae	Gasterosteus		96.97	Midori2	GCGGTTATACGAGAGGCCCAAGTTGATGAATTACGGCGTAAAGAGTGGTTAAGCTAAAATTAAAACTAAAGCCGAACACCTTCAGAGCTGTTATACGCATCCGAAGGTAAGAAGTTCAACCACGAAGGTGGCTTTATCTAACCTGAACCCACGAAAGCTACGGCA	0	1	0	0	0	1	0	0	0	0	0	0	0	0	1	1	0	0	2	1	0	0	2	1	0	0	3	1	0	0	1	0	1	0	1	2	0	2	0	0
OTU_453	Chordata	Actinopteri	Cypriniformes	Leuciscidae			96.512	Midori2	GCGGTTAAACGAGAGGCCCCAGTTAATAATACACGGCGTAAAGGGTGGTTAAGGAAAGTATTAACAATAAAGCCGAATGGCCCTTTGGCTGTCATGCTTCTAGCTGTCCGAAGCCCAATATACGAAAGTAGCTTTAATAAAGCCCACCTGACCCCACGAAAGCTGAGAAA	4	6	0	2	4	0	0	3	2	5	2	5	2	2	8	8	1	3	6	2	2	6	0	1	4	4	5	1	0	1	9	2	2	4	1	1	1	6	0	0
OTU_454	Chordata	Actinopteri	Cypriniformes	Leuciscidae	Leuciscus		97.576	Midori2	GCGGTTAAACGAGAGCCCCTAGTTAATAATACACGGCGTAAAGGGTGGTAAGGAAAGCATAACAATAAATCCGAATGGCCCTTTGGCTTTCATACGCTTCTAGGTGTCCGAAGCCCAATATACGAAAGTAGCTTTAATAAAGCCCACCTGACCCCACGAAAGCTACGATA	0	0	0	0	0	0	0	0	0	0	0	0	0	0	0	0	0	0	0	0	0	0	0	0	0	0	0	0	0	0	0	0	0	0	0	0	0	0	0	0
OTU_455	Chordata	Mammalia	Artiodactyla	Suidae	Sus	Sus scrofa	99.39	Midori2	GCGGTCATACGATTAACCCAAATTAATAGATCCACGGCGTAAAGAGTGTTTAAGaaaaaaaaaCCACAATAGAGTTAAATTATAACTAAGCTGTAAAAAGCCCTAGTTAAAATAAAATAACCCACGAAAGTGACTCTAATAATCCTGACACACGAAAGCTAGGAAA	0	0	25	0	0	15	27	0	32	2	0	1	1	0	7	0	0	0	0	0	0	0	0	0	0	0	6	4	6	0	0	0	1	0	0	0	0	13	0	0
OTU_456	No Match	No Match	No Match	No Match	No Match	No Match	No Match	Midori2	GGCAAGCTCTTCAAGCCCGACGATGTTCGGCTCTTGAACGAAGATTCGGCAAGAGCTTTGGCAGAACGCCTCTCCACTGCGCAGGCGTCGATTCGTGAAGTCGAGAGCAAACCGTTCGTTCAGCGACCCTACGCTCCCTTTACTACCAGCACGCTGCAGCAAGAAGGCAATCG	0	3	0	16	7	0	0	1	0	0	1	1	0	0	0	0	0	0	0	15	20	0	0	4	10	0	17	0	1	1	1	0	2	0	0	0	0	0	0	0
OTU_457	Chordata	Actinopteri	Perciformes	Gasterosteidae	Gasterosteus	Gasterosteus aculeatus	99.367	Midori2	GCGGTTATACGAGAGGCCCAAGTTGATGAATTACGGCGTAAAGAGTGGTTAAGCTAAAATTAAAACTAAAGCCGAACACCCCCAAAGCTGTTATACGCATCCGGAGGTGAGAAGTTCAACCACGAAGGTGGCTTTATCTAACCTGAACACACGAAAGCCAGCA	40	39	94	83	64	86	23	34	30	56	50	34	73	44	53	56	35	41	30	153	0	84	80	117	26	18	78	38	100	86	46	26	41	45	105	68	151	240	63	0
OTU_458	Chordata	Actinopteri	Perciformes	Percidae	Perca	Perca fluviatilis	98.16	Midori2	GCGGTTATACGAGAGGCCCAAGTTGATAGACATCGGCGTAAAGCGTGGTTAAGATTAAAGACAATACTAAAGCCGAACACCTTCAGAGCTGTTATACGCATCCGAAGGTAAGAAGTTCAACCACGAAAGTGGTTTTATTCCCCTGAACCCACGAAAGCTACGGCA	4	11	2	4	0	5	2	7	5	0	0	0	0	1	2	0	4	2	1	4	1	2	7	1	4	6	5	11	4	3	3	2	5	5	4	7	4	4	0	0
OTU_459	Chordata	Actinopteri	Cypriniformes	Leuciscidae	Rutilus	Rutilus rutilus	97.661	Midori2	GCGGTTAAACGAGAGGCCCTAGTTAGTAATACACGGCGTAAAGGGTGGTTAAGGGGAGCGCAATAATAAAGCCAAATGGCCCTTTGGCTGTCATACGCTTCTAGGTGTCCGAAGTCCAATATACGAAAGTAGCTTTAATAAAGCCCACCTGACCCCACGAAAGCTGAGAAA	4	21	10	8	43	11	18	10	72	139	63	74	21	13	5	23	77	52	1	8	11025	6	2	1	9	7	0	1	10	39	11	44	7	34	39	62	14	5	0	0
OTU_460	No Match	No Match	No Match	No Match	No Match	No Match	No Match	Midori2	AGAAATCTGTGCAGGCATCAAATCGCGCGCGCCACGTAAACCAACTGCATTGAGTTTCATGAGTACCAACAAGTGTAATAACTCTTCACTTAAATCAGTGTGCTCACGTAATGGAAAGGCAACATTTTCAAAAACACTGAGATCAGTAAAGAGTGCGC	8	0	0	2	11	3	0	0	0	6	0	1	1	0	1	5	1	0	0	0	25	0	0	0	0	3	0	0	0	0	44	1	0	3	1	1	0	3	0	0
OTU_461	Chordata	Actinopteri	Gobiiformes	Gobiidae	Neogobius		96.988	Midori2	GCGGTTAAACGAGAGGCCCAAGTTGACAAAAATCGGCGAAAAGCGTGGTTAGTGATATCACCTCCACTAAAGCCAAACACCTTCAAGGCTGTACGCCCCCGAAGACGGAAGCCCAATCACGAAAGTAGCTTTAATTTTCATGAAGCCACGAAAGCTAGGAAA	5	6	5	7	3	7	11	8	1	15	11	8	10	13	12	7	10	9	6	17	14	15	4	9	11	7	10	12	5	3	8	9	17	9	6	3	6	18	0	0
OTU_462	Chordata	Actinopteri	Gobiiformes	Gobiidae	Neogobius	Neogobius melanostomus	98.137	Midori2	GCGGTTATACGGGAGGCCCAAGTTGACAAAAATCGGCGAAAAGCGTGGTTAGTGATATCACCTCCTAAAGCCAAACACCTTCAAGGCTGTAATACGCCCCCGAAGACAGGAAGCCCAATCACGAAAGTAGCTTTAATTTTCATGAAGCCACGAAAGCTAAAA	9	26	15	32	16	30	36	14	14	23	18	17	18	15	18	16	34	28	15	14	12	14	9	21	22	10	27	15	12	13	26	10	23	19	9	29	21	11	0	10
OTU_463	Chordata	Actinopteri	Gobiiformes	Gobiidae	Neogobius		95.181	Midori2	GCGGTTATACGAGAGGCCCAAGTTGATAGACATCGGCGTAAAGCGTGGTTAGTGATATCACCTCCACTAAAGCCAAACACCTTCAAGGCTGTAATACGCCCCCGAAGACAGGAAGCCCAATCACGAAAGTAGCTTTAATTACTATGAATCCACGAAAGCTAGGAAA	850	1115	423	456	293	233	710	424	530	279	397	454	679	565	664	873	901	574	592	398	73	283	449	308	600	403	653	531	372	425	519	483	815	714	657	691	393	337	0	0
OTU_464	Chordata	Actinopteri	Cypriniformes	Leuciscidae	Leuciscus		95.906	Midori2	GCGGTTAAACGAGAGGCCCTAGTTAATAATACACGGCGTAAAGGGTGGTTAAGGAGAGCATAACAATAAAGCCGAATGGCCCTTTGGCTGTCATACGCTTCTAGGTGCCCGAAGTTCAACATACAAAAGTAGCTTTAATAACGCCCACCTACCCCACGAAAGCTGAGAAA	2	0	0	1	1	0	1	0	0	1	1	0	4	0	5	2	3	1	2	1	0	0	1	0	0	0	1	2	0	0	5	2	1	1	2	0	0	1	0	0
OTU_465	Chordata	Actinopteri	Gobiiformes	Gobiidae	Neogobius		96.988	Midori2	GCGGTTATACGAGAGGCCCAAGTTGACAAAAATCGGCGAAAAGCGTGGTTAATGATATCACCTCCACTAAAGCCAACCTTCAAGGCTGTAATACGCCCCCGAAGACAGGAAGCCCTATCACGAAAGTAGCTTTAATTTTCATGAAGCCACGAAAGCTAGGAAA	0	1	0	0	1	2	5	0	0	0	0	1	2	0	1	1	0	0	0	0	0	0	0	0	2	0	0	0	0	0	0	1	0	0	0	1	1	0	0	0
OTU_466	Chordata	Actinopteri	Perciformes	Percidae	Perca		96.988	Midori2	GCGGTTATACGAGAGGCCCAAGTTGATAGACAGCGTAAAGCGTGGTTAAGATTAAAGACAATACTAAAGCCGAACACCTTCAGAGCTGTTATACGCATCCGAAGGTAAGAAGTTCAACCACGAAAGTGGCTTTATTACCCCTGAACCCACGAAAGCTACGATA	7	11	1	4	2	1	2	3	5	1	3	4	1	0	2	2	14	8	5	2	1	1	2	2	1	2	8	3	2	6	4	3	8	4	9	4	1	1	0	0
OTU_467	Chordata	Actinopteri	Cypriniformes	Tincidae	Tinca	Tinca tinca	98.204	Midori2	GCGGTTAAACGAGAGGCCCTAGTTAATAATACACGGCGTAAAGGGTGGTTAAGGAAAGCATTATAATAAAGCCAAATGGCCCCTTGGCCGTCATACGCTTCTAGGTGCCCGAAGCCCAACCACACGAAAGTAGCTTTAACAAAGCCCACCTGACCCCACGAAAGCTACGATA	0	108	0	46	0	0	0	0	0	0	0	34	0	0	23	0	0	0	0	0	0	0	0	16	0	0	17	0	0	0	0	19	73	0	0	0	0	0	0	0
OTU_468	Chordata	Actinopteri	Gobiiformes	Gobiidae	Neogobius		96.386	Midori2	GCGGTTATACGAGAGGCCCAAGTTGACAAAAATCGGCGAAAGGCGTGGTTGATATCACCTCCACTAAAGCCAAACACCTTCAAGGCTGTAATACGCCCCCGAAGACAAAGCCCAATCACGAAAGTAGCTTTAATTTTCATGAAGCCACGAAAGCTAGGAAA	0	0	0	0	0	0	0	0	0	0	0	0	0	0	0	0	0	0	0	0	0	0	0	0	0	0	0	0	0	1	0	0	0	0	0	0	0	0	0	0
OTU_469	Chordata	Actinopteri	Cypriniformes	Leuciscidae	Leuciscus	Leuciscus leuciscus	97.093	Midori2	GCGGTTAAACGAGAGGCCCTAGTTAATAGTACACGGCGTAAAGGGTGGTTAAGGAGAGCATAACAATAAAGCCAAATGGCCCCTTTGGCTGTCATACGCTTCTAGGTGTCCGAAGCCCAACATACGAAAGTAGCTTTAATAACGCCCACCTGACCCCACGAAAGCTGAGAAA	3	3	76	151	3	7	1	0	4	1	7	7	139	85	221	303	10	15	103	85	4	9	1	7	0	9	8	7	3	0	9	6	11	16	2	1	2	3	0	0
OTU_470	Chordata	Actinopteri	Cypriniformes	Leuciscidae	Abramis		96.512	Midori2	GCGGTTAAACGAGAGGCCCCAGTTAAATACACGGCGTAAAGGGTGGCTAAGGAAATTAACAATAAAGCCGAATGGCCCTTTGGCTGTCATACGCTTCTAGGTGTCCGAAGTTCAACATACGAAAGTAGCTTTAATAACGCCCACCTGACCCCACGAAAGCTGAGAAA	0	0	0	1	1	0	0	0	2	0	0	0	0	0	0	0	1	0	0	0	0	2	0	0	0	0	1	0	0	0	1	0	0	0	0	0	0	0	0	0
OTU_471	Chordata	Actinopteri	Cypriniformes	Leuciscidae	Rutilus	Rutilus rutilus	97.661	Midori2	GCTGTTAATCGAAAGGCCCCAGTTAATAATACACGGCGTAAAGGGTGGTTAAGGGAAGCACAATAATAAAGCCAAATGGCCCTTTGGCTGTCATACGCTTCTAGGTGTCCGAAGCCCAATATACGAAAGTAGCTTTAATAAAGCCCACCTGACCCCACGAAAGCTGAGAAA	2	8	1	3	1	5	21	8	8	6	2	16	13	8	5	12	10	9	5	4	0	5	4	4	4	7	8	5	2	0	9	6	10	13	1	3	6	4	0	0
OTU_472	Chordata	Mammalia	Rodentia	Myocastoridae	Myocastor	Myocastor coypus	98.758	Midori2	GCGTCATACGATTAACCCTGATTAATAAACCCCGGCGTAAAGAGTATTAAAGATACAATAAAAATAAGATTAAATTTCACCTGGGTCGTAAAAAACTATAGATAAAAATAAAATCGATAACGAAGGTAATCTTAATATATCAGAATATACTAAAGCTAATACA	0	13	0	45	10	0	2	0	9	7	0	0	1	39	0	8	14	0	0	0	0	0	16	16	0	0	0	15	0	0	6	0	0	6	0	0	12	0	0	0
OTU_473	Chordata	Actinopteri	Gobiiformes	Gobiidae	Neogobius		96.988	Midori2	GCGGTTATACGAGAGGCCCTAGTTGATAATTGTCGGCGAAAAGCGTGGTTAGTGATATCACCTCCACTAAAGCCAAACACCTTCAAGGCTGTAATACGCCCCCGAAGACAGGAAGCCCAATCACGAAAGTAGCTTTAATTTTCATGAAGCCACGAAAGCTAGGAAA	3	7	21	10	16	6	13	9	7	4	12	18	13	11	19	17	12	17	15	14	15	7	11	37	7	8	6	13	6	4	20	17	3	14	8	6	5	15	0	0
OTU_474	Chordata	Actinopteri	Perciformes	Percidae	Perca	Perca fluviatilis	98.113	Midori2	TCGGTTATACGAGAGGCCCAAGTTGATAGACATCGGAAAAGCGTGGTTAAGATTAAAGACAATACTAAAGCCGAACACCTTCAGAGCTGTTATACGCATCCGAAGGTAAGAAGTTCAACCACGAAAGTGGCTTTATAGCCCCTGAACCCACGAAAGCTGAGAAA	2	1	4	1	0	2	0	0	2	3	1	3	5	2	1	2	2	2	0	2	0	2	1	1	1	4	1	2	1	1	5	0	8	3	1	0	1	3	0	0
OTU_475	Chordata	Actinopteri	Perciformes	Percidae	Perca	Perca fluviatilis	97.561	Midori2	GCGGTTATACGAGAGGCCCAAGTTGATAGACATCGGCGTAAAGCGTGGTTAAGATTAAAAAAGATACTAAAGCCGAACACCTTCAGAGCTGTTATACGCATCCGAAGGTAAGAAGTTCAACCACGAAAGTGGCTTTATAGCCCCTGAACCCACGAAAGCTAGGAAA	18	18	5	19	5	7	7	5	8	4	11	10	9	19	18	17	9	9	10	9	2	1	3	10	6	14	8	10	8	5	11	11	7	16	13	8	12	4	0	0
OTU_476	Chordata	Actinopteri	Gobiiformes	Gobiidae	Neogobius		96.988	Midori2	GCGGTTATACGAGAGGCCCAAGTTGGCAAAAATCGGCGAAAAGCGTGGTTAGTGGTATCACCTCCACTAAAGCCAAACACCTTCAAGGCTGTAGTACGCCCCCGAAGACAGGAAGCCCGATCACGAAAGTAGCTTTAATTTTCATGAAGCCACGAAGGCTAGGAAA	0	0	0	0	0	0	0	0	0	0	0	1	0	0	0	0	0	0	0	0	0	0	0	0	0	0	0	0	0	0	0	0	1	0	1	0	0	0	0	0
OTU_477	Chordata	Actinopteri	Cypriniformes	Leuciscidae	Abramis		96.512	Midori2	GCGGTTAAACGAGACGCCCCAGTTAATAATACACGGCGTAAAGGGTGGTTAAGGAAAGTATTAACAATAAAGCCGAATGGCCCTTTGGCTGTCATACGCTTCTTCTCCGAAGTTCAACATACGAAAGTAGCTTTAATAACGCCCACCTGACCCCACGAAAACTGAGAAA	0	0	0	0	0	1	0	0	0	0	0	0	0	0	0	0	0	0	0	0	1	0	0	0	0	0	1	1	0	0	1	0	1	0	0	0	0	1	0	0
OTU_478	Chordata	Actinopteri	Perciformes	Percidae	Perca	Perca fluviatilis	98.125	Midori2	GCGGTTATACGAGAGGCCCAAGTTGATACATCGGCGTAAAGCGTGGTTAAGATTAAAGACAATACCAAAGCCGAACACCTTCAGAGCTGTTATACGCATCCGAAGGTAAGAAGTTCAACCACGAAAGTGGCTTTATAGCCCCTGAACCCACGAAAGCTGAGAAA	2	4	2	1	1	1	1	1	2	1	1	2	6	5	5	2	1	9	0	0	0	0	2	39	118	3	2	62	6	3	3	2	2	2	4	3	3	2	0	0
OTU_479	Chordata	Actinopteri	Cypriniformes	Leuciscidae	Abramis	Abramis brama	98.193	Midori2	GCGGTTAAACGAGAGGCCCCAGTTAATAATACACGGCGTAAAGGGTGGTTAAGGAAAGTATTAACAATAAAGCCGAATTGCCCTTAGCTGTCATACGCTTCTAGGTGTCCGAAGTTCAACATACGAAAGTAGCTTTAATAACGCCCACCTGACCCCACGAAAGCTACGATA	0	1	1	1	0	2	0	3	0	0	0	0	0	3	0	1	1	2	1	2	0	0	2	0	0	0	3	1	0	0	1	0	1	1	0	0	0	0	0	0
OTU_480	Chordata	Actinopteri	Perciformes	Percidae	Perca		95.758	Midori2	GCGGTTATACGAGAGGCCCAAGTTGATAGACATCGGCGTAAAGCGTGGTTAAGATTAAAGACAATACTAAAGCCGAACACCTTCAGAGCTGTTATACGCATCCGAAGGTAAGAAGTTCAACCACGAAAGTGGCTTTATCTAACCCCCCCACGAAAGCTACGGCA	2	0	6	0	1	0	0	0	1	0	2	0	0	5	2	3	0	0	1	0	0	0	3	0	0	1	4	0	1	0	1	1	2	0	0	2	1	2	0	0
OTU_481	Chordata	Aves	Columbiformes	Columbidae	Columba	Columba palumbus	99.412	Midori2	GCGGTCACACAAGAGACCCAAACTAATCGTTCACGGCGTAAAGAGTGGACTCATGCTTATCACATTAATTAAGGTCAAAACGCAGCTGAGCTGTCATAAGCTTAAGGTGCACTTAAAACCGCCCTAAATACGACCCTAAACTCATACGACTCAATGAACTCCACGAAAGCTGAGAAA	5	0	2	7	5	0	0	0	0	3	0	0	2	9685	0	0	3	3	0	1	0	0	0	2	0	0	8	5	0	1	1	0	0	5	3	0	2	0	0	0
OTU_482	Chordata	Actinopteri	Perciformes	Percidae	Perca	Perca fluviatilis	98.16	Midori2	ACGGTTATACGAGAGGCCCAAGTTGATAGACATCGCGTAAAGCGTGGTTAAGATTAAATACAATACTAAAGCCGAACACCTTCAGAGCTGTTATACGCATCCGAAGGTAAGAAGTTCAACCACGAAAGTGGCTTTATAGCCCCTGAACCCACGAAAGCTAGGAAA	1	0	0	0	0	0	0	2	0	0	0	0	0	0	0	0	0	0	0	0	0	0	1	0	0	0	0	1	0	1	0	0	0	0	0	0	0	0	0	0
OTU_483	Chordata	Actinopteri	Cypriniformes	Leuciscidae	Chondrostoma		95.906	Midori2	GCGGTTAAACGAGAGGCCCTAGTTAATAATACACGGCGTAAAGGGTGGTTAAGGAAAACATAACAATAAAGCCGAATGGCCCTTTGGCTGTCATACGCTTCTAGGTGTCCGAAGCCCTAATACGAAAGTAACTTTAACGAACCCACCTGACCCCACGAAAGCTGAGGAA	26	99	55	55	60	114	77	66	53	116	90	124	105	273	51	59	140	92	59	59	4	0	5	32	28	31	56	50	66	44	105	47	86	108	67	30	59	19	0	0
OTU_484	Chordata	Actinopteri	Cypriniformes	Leuciscidae	Rutilus	Rutilus rutilus	97.688	Midori2	GCGGTTAAACGAGAGGCCCTAGTTAATAATACACGGCGTAAAGGGTGGTTAAGGGAAGCACAATAATAAAGCCGAATGGCCCTTTTGGCTGTCATACGCTTCTAGGTGTCCGAAGCCCAAATATACGAAAGTAGCTTTAATAAAGTCCACCTGACCCCACGAAAGCTGAGAAA	81	124	15	18	5	52	32	28	33	133	52	153	79	74	9	34	83	117	72	40	2	0	22	10	9	48	20	36	23	24	40	26	84	44	21	21	58	35	0	0
OTU_485	Chordata	Aves	Gruiformes	Rallidae	Gallinula	Gallinula chloropus	98.857	Midori2	GCGGTCACACAAGAAGCCCAAATTAACCGTCACCCGGCGTAAAGAGTGGTAACTTACTATCACTTAACTAAGGTCGAAATACAACTAAGCTGTCATAAGCCCATGATGTACTTAAGACCACCCTAAAAACGACCCTAGCAGTAACGATCAATTAAATACCACGAAAGCCAAGACA	0	0	0	0	0	0	0	0	0	0	0	0	0	0	0	0	0	0	0	0	0	0	0	0	0	0	0	0	0	0	0	0	0	0	0	0	0	0	0	0
OTU_486	No Match	No Match	No Match	No Match	No Match	No Match	No Match	Midori2	AGTGTCTGCAGCGACGGCAAAGCCGGTGTGGCCAGAAACATGCCAATGACCGCGCAGAACACAGCAAGCTGGGTCACGCGGGGCTTGGTCAGCACCATGTACTGGCGCCAGAGCGAGTCGTGCGGGCGTGCGGTAGCAGTAGTCATGACAGCATTTTAGG	0	0	0	0	0	0	0	0	0	0	0	37	0	0	0	0	0	1	0	0	0	0	0	7	0	0	0	0	0	0	22	0	0	0	0	0	0	0	0	0
OTU_487	Chordata	Actinopteri	Gobiiformes	Gobiidae	Neogobius		96.988	Midori2	GCGGTTATACGATAGGCCCAAGTTGGCAAAAATCTGCGAAAAGCGTGGTTAGTGATATCACCTCCACTAAAGCCAAACACCTTCATGCTGTAATACGCCCCCGAAGACAGGAAGCCCAATCACGAAAGTAGCTTTAATTTTCATGAAGCCACGAAAGCTAGGAAA	0	0	0	0	0	0	0	0	0	0	0	1	0	0	1	0	0	0	0	0	1	0	0	1	1	1	1	0	1	0	0	0	0	0	0	0	0	0	0	0
OTU_488	No Match	No Match	No Match	No Match	No Match	No Match	No Match	Midori2	GTGCAAATGGAACACGACTCTCAGAAGTGTTTTTCATCCCAGCTATGGTGTTTTTTGACCGAACTCAAACACACCTATTCTACGAAGTTCTGTAGCATCAGTGCACTACATTTAGTACTATGTAAACTTATTTAGGTAAAACGTGACGCAAGCCAGAC	0	0	0	3	15	1	1	2	4	0	0	0	0	0	22	7	9	7	0	0	1	0	2	1	4	0	0	6	0	4	2	14	2	0	0	0	5	0	0	0
OTU_489	Chordata	Actinopteri	Gobiiformes	Gobiidae	Neogobius		95.181	Midori2	GCGGTTATACGAGAGGCCCAAGTTGACAAAAATCGGCGAAAAGCGTGGTTAGTGATATCACCTCCACTAAAGCCAAACACCTTCAAGGCTGTAATACGCATCCGAAGGTAAGAAGTTCAACCACGAAAGTAGCTTTAATTTTCATGAAGCCACGAAAGCTAGGAAA	0	4	0	0	0	0	0	3	1	0	0	1	0	3	0	2	0	0	0	0	0	0	0	0	2	0	3	0	0	0	1	1	0	1	1	0	0	0	0	0
OTU_490	Chordata	Actinopteri	Cypriniformes	Leuciscidae			94.737	Midori2	GCGGTTATACGAGAGGCCCAAGTTGACAAAAATCGGCGAAAAGGGTGGTTAAGGGGAGCACAATAATAAAGCCAAATGGCCCTTTGGCTGTCATACGCTTCTAGGTGTCCGAAGCCCAATATACGAAAGTAGCTTTAATAAAGCCCACCTGACCCCACGAAAGCTGAGAAA	31	29	17	18	13	8	17	29	57	39	28	62	39	26	25	47	45	46	20	34	14	16	3	8	28	41	19	18	15	20	28	43	47	41	18	34	32	24	0	0
OTU_491	Chordata	Actinopteri	Cypriniformes	Cyprinidae	Barbus		95.882	Midori2	GCGGTTATACGAGAGGCCCTAGTTGATATTATAACGGCGTAAAGGGTGGTTAGGGATAAATAATAATAAAGCCAAATGGCCCCTCCGTCATACGCTTCTAGGTGTCCGAGGCCCTATATATAAAAGTAGCTTTAATTAACCCGCCTGACCCCACGAAAACTGAGAAA	0	0	0	0	0	0	0	0	0	0	0	0	0	0	0	0	0	0	0	0	0	0	0	0	0	0	0	0	0	0	0	0	0	0	0	0	0	0	0	0
OTU_492	Chordata	Actinopteri	Cypriniformes	Leuciscidae	Abramis		96.512	Midori2	GCGGTTAAACGAGAGGCCCCAGTTAATAATACACGGCGTAAAGGGTTAAGGAAAGTATTAACAATAAAGCCGAATGGCCCTTTGGCTGTCATACGCTTCTAGGTGTCCGAATTTCAACATACGAAAGTAGCTTTAATAACGCCCACCTGACCCCACGAAAGCTAGGAAA	0	0	1	1	1	2	1	0	2	2	3	0	1	0	0	1	0	2	0	1	0	0	0	1	0	0	0	1	1	0	0	0	0	1	2	0	1	2	0	0
OTU_493	Chordata	Actinopteri	Gobiiformes	Gobiidae	Neogobius	Neogobius melanostomus	99.371	Midori2	GCGGTTATACGAGAGGCCCAAGTTGACAAAAATCGGCGAAAAGCGTGGTTAGTGATATCACCTCCACTAAAGCCAAACACCTTCAAGGCTGTAATACGCCCCCGAAGACAGGAAGCCCAATCACGAAAGTAGCTTTAATTTTCATTAAGCCACGAAAGCCGAAA	385	452	394	424	502	712	463	310	345	376	472	506	335	339	367	483	386	409	366	308	345	364	285	418	287	323	526	387	357	446	464	363	596	433	380	430	379	470	0	142
OTU_494	No Match	No Match	No Match	No Match	No Match	No Match	No Match	Midori2	GCTTAAAGGCAGGGTTGGTTCAGTATAATACGATAATCATTGGTGGAAATGAAAGAGCAGTGGAAATGTACAATGAAGTGAGCAGTCTTCGTAAGGGTCTGGGTTATCGATTCCTGGGTTTCATTGATGCCAATGGTAATTCCAACAATGAATTAAACAGGCATCTGAC	0	0	0	0	0	0	0	0	0	0	0	0	0	0	0	0	0	0	0	0	77	0	0	0	0	0	0	0	0	0	0	0	0	0	0	0	0	0	0	0
OTU_495	No Match	No Match	No Match	No Match	No Match	No Match	No Match	Midori2	GCTCAAACAGGCCGCTGTAGCCCACGCCCATGATGAGCAACGCACTCACGATGAAGGCCCCTGTGGCTTCCGGCAGGGTCACGCCCTGCGTCACCGCCAGCACCGCCGCACCGGGCGTTGACCATGCCGTCAACACCGGCTGCTGATACCACAGGCTCAAGAC	0	12	0	11	23	0	8	1	0	3	5	0	1	1	1	23	1	3	8	2	7	7	1	0	0	16	3	4	0	0	4	0	4	0	0	0	1	0	0	0
OTU_496	Chordata	Actinopteri	Perciformes	Percidae	Perca		95.181	Midori2	GCGGTTATACGAGAGGCCCAAGTTGATAGACATCGGCGTAAAGCGTGGTTAAAGACAATACTAAAGCCGAACACCTTCAGAGCTGTTATACGCATCCGAAGGTAAGAAGTTCAACCACGAAAGTGGCTTTATTACCCCTGAACCCACGAAAGCTACGATA	0	0	0	0	0	0	0	0	0	0	0	0	0	0	0	0	0	0	0	0	0	0	0	0	0	0	0	0	0	0	0	0	0	0	0	0	0	0	0	0
OTU_497	No Match	No Match	No Match	No Match	No Match	No Match	No Match	Midori2	AGGCATCTGATCTGGCCAGTTCCGGAGCTTGAAACTTTGGCAATGACTATCAGTCCTTGGCACTGGATTTCGAAGGACAACAAACATTTACTCCTTGAACCGGTACAACAACGCATTCAGAATAAGACAATCAACGCCTATCTTATTGATAAGGACATCTATAGAGC	0	0	0	0	0	0	0	0	0	0	0	0	0	0	0	0	0	0	0	0	0	0	74	0	0	0	0	0	0	0	0	0	0	0	0	0	0	0	0	0
OTU_498	No Match	No Match	No Match	No Match	No Match	No Match	No Match	Midori2	ATGAACAAAAAACACCACCAACCTACTCAGAATTTTCAGGTGGGAGGGGTCCGGCCaaaaaaaaaaCCATCCGTTCaaaaaaagtcaccccctcttaaaaaaaaTCTTGCCCAGGCCAGGATCATGTTCTGATACATCAACCTACACTCGCAGCTTGGCTTCAA	0	0	3	0	0	0	3	0	1	0	0	4	6	0	0	0	1	6	0	0	0	0	1	0	0	4	0	0	0	0	0	0	0	2	1	3	0	66	0	0
OTU_499	No Match	No Match	No Match	No Match	No Match	No Match	No Match	Midori2	CAGAAGTCCCAAGATCTGCTGGAATGTCTTCTGGCCCGAGAACGGTGCAGTGCCGTAAGCGTCGCCATAGAACGCGCCATTGATTGCCGATCCGGCCGCAAGGTAGTTACCTGTGGAGTACCACTGCCCGATGGACTGTCCAGGCAGCAAGGAGCCAAGAT	0	0	0	0	0	0	0	0	0	0	0	76	0	0	0	0	0	0	0	0	0	0	0	0	0	0	0	0	0	0	0	0	0	0	0	0	0	0	0	0
OTU_500	Chordata	Actinopteri	Perciformes	Percidae	Sander		96.364	Midori2	GCGGTTATACGAGAGGCCCAAGTTGATAGACATCGGCGTAAAGCGTGGTTAAGACAAAAACAAAACTAAAGCCGAACACCTTCAGAGCTGTTATACGCATCCGAAGGTAAGAAGTTTAATTACGAAAGTGGCTTTATAGCCCCTGAACCCACGAAAGCTACGATA	7	14	1	3	1	0	4	1	3	3	1	4	6	0	2	6	14	5	4	1	1	0	0	0	3	5	2	4	1	2	2	4	4	0	4	3	2	0	0	0
OTU_501	Chordata	Actinopteri	Gobiiformes	Gobiidae	Neogobius		96.988	Midori2	GCGGTTATACGATAGGCCCAAGTTGACAAAAACCGCGAAAAGCGCGTTAGTGATATCACCTCCACTAAAGCCAAACACCTTCAAGGCTGTAATACGCCCCCGAAGACAGGAAGCCCAATCACGAAAGTAGCTTTAATTTTCATGAAGCCACGAAAGCTAGGAAA	0	0	1	1	0	0	0	0	0	1	1	1	1	0	0	0	0	2	1	1	0	0	0	0	0	0	0	0	0	0	0	0	1	1	0	1	0	1	0	1
OTU_502	Chordata	Actinopteri	Anguilliformes	Anguillidae	Anguilla		96.532	Midori2	GCGGTTATACGAGGGGCTCAAATTGATATTACACGGCGTAAAGCGTGATTaaaaaacaaaaaaaaaaaaaCTAAAGCCAAACACTTCCCAAGCTGTCATACGCTACCGGAACATAAACGAAGCCCTATAACGAAAGTAGCTTTAACACCTTTGAACTCACGACAGTTGAGGAA	0	0	0	0	0	0	0	0	0	0	0	0	0	0	0	0	0	0	0	0	0	0	0	0	0	0	0	0	0	0	0	0	0	0	0	0	0	0	0	0
OTU_503	Chordata	Actinopteri	Perciformes	Percidae	Perca		96.988	Midori2	GCGGTTATACGAGAGGCCCAAGTTGATAGACATCGGCGTAAAGCGTGGTTAAGATTAAAGACAATACTAAAGCCCACCTTCAGAGCTGTTATACGCATCCGAAGGTAAGAAGTTCAACCACGAAAGTGGCTTTATTACCCCTGAACCCACGAAAGCTACGATA	10	9	2	9	3	3	5	8	3	1	1	0	0	1	1	3	8	9	6	3	3	0	1	0	1	0	7	5	1	4	7	3	8	4	9	4	4	0	0	0
OTU_504	Chordata	Actinopteri	Cypriniformes	Leuciscidae			93.567	Midori2	GCGGTTAAACGAGAGGCCCTTTAATAATACACGGCGTAAAGGGTGGTTAAGGAGAGCATAACAATAAAGTCAAATGGCCCCTTGGCCGTCATACGCTTCTAGGAGTCCGAAGCCCTAATACGAAAGTAACTTTAATAAACCCACCTGACCCCACGAAAGCTGAGAAA	10	10	15	38	12	17	17	9	24	34	14	81	90	40	157	79	59	63	64	47	14	0	1	2	2	8	13	14	4	7	16	22	56	29	17	17	11	1	0	0
OTU_505	Chordata	Actinopteri	Gobiiformes	Gobiidae	Neogobius	Neogobius melanostomus	97.576	Midori2	TCGGTTATACGAGAGGCCCAAGTTGACAAAAATCGGCGAAAAGCGTAGTTAGTGATATCACCTCCACTAAAGCCAAACACCTTCAAGGCGTAATACGCCCCCGAAGACAGGAAGCCCAATCACAAAAGTACCTTTAATTTTCATGAAGCCACGAAAGCTAGGAAA	0	0	0	0	0	1	0	1	0	0	0	0	0	1	0	0	0	0	0	0	0	0	0	0	0	0	0	0	0	0	0	0	0	0	1	0	0	0	0	0
OTU_506	Chordata	Actinopteri	Perciformes	Percidae	Perca		95.181	Midori2	GCGGTTATACGAGAGGCCCAAGTTGACAAAAATCGGCGAAAAGCGTGGTTAAGATTACAATACTAAAGCCGAACACCTTCAGAGCTGTTATACGCATCCGAAGGTAAGAAGTTCAACCACGAAAGTGGCTTTATAGCCCCTGAACCCACGAAAGCTACGATA	1296	1320	626	751	518	737	964	769	768	521	659	932	1064	1004	1122	1371	1159	873	918	622	92	410	732	476	712	542	1177	861	760	608	951	1054	1387	1110	854	1058	585	650	0	0
OTU_507	No Match	No Match	No Match	No Match	No Match	No Match	No Match	Midori2	GACCTGTGGCGCAAGATGCTGTCGATGCTGTTCGAAACTGGCCATCCTTGGATCACTTTCAAAGACCCTTGCAACGTGCGCTCACCTCAGCAACATGTGGGCGTGGTGCACTCATCCAACCTGTGCACCGAGATCACACTCAACACCAGTGACACCGAAACTGCGGTTTG	1	0	0	0	0	0	0	0	0	10	0	0	0	0	0	0	0	0	0	0	0	57	0	0	0	0	0	0	0	0	0	0	0	0	0	0	0	0	0	0
OTU_508	Chordata	Actinopteri	Esociformes	Esocidae	Esox	Esox lucius	97.484	Midori2	GCGGTTATACGAGAGGCCCTAGTTGATAATTGTCGGCGTAAAGAGTGGTTTAGAAAATAATTTAATAAAGCCGAACACCTCCCCTTTGTTATACACATTTGAAGATATGAAGCCCTACCGCGAAAGCAGCTTTAAGTATCCTGAACCCACGAAAGCTACGATA	0	0	12	0	0	5	8	0	0	0	0	9	3	0	0	0	0	0	3	0	4	0	1	3	0	6	0	0	0	0	6	13	3	5	0	0	0	4	0	0
OTU_509	Chordata	Actinopteri	Cypriniformes	Leuciscidae	Chondrostoma	Chondrostoma nasus	97.661	Midori2	GCGGTTATACGAGAGGCCCAAGTTAATAATACACGGCGTAGAGGGTGGTTAAGGAAAGCATAACAATAAAGCCGAATGGCCCTTTGGCGTCATACGCTTCTAGGTGTCCGAAGCCCATTATACGAAAGTAGCTTTAACAAAGCCCACCTGACCCCACGAAAGCTGAGAAA	0	23	16	23	0	0	2	0	0	0	0	37	0	4	0	3	2	1	0	0	0	16	0	1	0	0	62	0	44	0	27	4	5	2	0	2	0	0	0	0
OTU_510	Chordata	Mammalia	Artiodactyla	Bovidae			93.865	Midori2	TCGGTCATACGATTAACCCAAGCTAACAGTAGTACGGCTTAAAACCTGTTAAATCACCATACCAAATAGGGTTAAATTCTAACTAAGCTGTAAAAAGCCATGATTAAAATAAAAATAAATGACGAATTGACCCTACAATATCCCACACTATAGCTAAGACC	0	0	0	0	0	0	0	0	0	0	0	0	0	0	0	0	0	0	0	0	0	0	0	0	0	0	0	0	0	0	0	0	0	0	0	0	0	0	0	0
OTU_511	No Match	No Match	No Match	No Match	No Match	No Match	No Match	Midori2	TGTTTTTCAAAAGCGCCGTTCACGACAAGAGCGGACCAACCGCCGCCTTCCGACTGCGCAACGCGGGCGAGTGTGGCAGGCATGGCTTTTACCTCAAGATCGAGAACGCCATGACAGTTTTCTTCCGGGGCTGCCCCTGCCACAGGCAAAATACTGTGGGGAGA	0	0	0	0	0	0	0	0	2	5	0	0	0	0	0	0	0	6	0	0	6	0	41	0	9	0	0	0	0	0	0	0	0	1	0	0	0	0	0	0
OTU_512	Chordata	Mammalia	Rodentia	Cricetidae	Ondatra		96.933	Midori2	GCGGTCATACGATTAACCCAAAAACTTTATTCTCGGCGTAAAACGTGCTACTAGGAAACCAAAAATAGAATTAAAAACCATCCAATATGTGAAAATTCATCGCTGGACCTAAAACCAATGACGAAAGTAATTCTAGAATTCTTGACACACGATAGCTAAGATC	0	0	0	0	0	0	0	0	0	0	0	0	0	0	0	0	0	0	0	0	0	0	0	0	0	1	0	0	0	0	0	0	0	0	0	0	0	0	0	0
OTU_513	Chordata	Actinopteri	Cypriniformes	Leuciscidae	Leuciscus		96.512	Midori2	GCGGTTAAACGAGAGGCCCCAGTTAATAATACACGTGTAAACGGTGGTTAAGGAAAGTATTAACAATAAAGCCGAATGGCCCTTTGGCTGTCATACGCTTCTAGGTGTCCGAAGCCCAATATACGAAAGTAGCTTTAATAAAGCCCACCTGACCCCACGAAAGCTGAGAAA	2	1	4	2	1	4	4	4	3	2	2	1	7	7	3	3	6	5	6	7	2	4	0	0	3	10	8	3	1	4	0	5	10	5	1	1	0	5	0	0
OTU_514	Chordata	Actinopteri	Cypriniformes				95.858	Midori2	GCGGTTATACGAGAGGCCCAAGTTGATATTACAACGGCGTAAAGGGTGGTTAAGGATAAAAATAAAGTCAAATGGCCCCTTGCCCGTCATACGCTTCTAGGAGTCCGAAGCCCTAATACGAAAGTAACTTTAATAAACCCACCTGACCCCACGAAAGCTGAGAAA	173	237	279	276	370	326	464	295	256	210	255	355	442	407	503	461	518	330	259	265	23	0	60	50	166	155	147	168	236	146	347	355	256	336	170	258	209	146	1	0
OTU_515	Chordata	Actinopteri	Cypriniformes	Cyprinidae	Cyprinus	Cyprinus carpio	99.387	manual check	GCGGTAGACGAGAGGCCCTAGTTGATATTACAACGGCGTAAAGGGTGGTTAAGGATAAACAAAAATAAAGTCAAATGGCCCCTTGGCCGTCATACGCTTCTAGGAGTCCGAAGCCCTAATACGAAAGTAACTTTAATAAACCCACCTGACCCCACGAAAGCTACGGCA	6	10	22	24	30	29	15	14	13	23	15	17	46	25	36	19	19	30	13	17	2	0	7	6	5	8	12	12	25	14	29	19	17	21	13	20	37	28	2	0
OTU_516	Chordata	Mammalia	Primates	Hominidae	Homo	Homo sapiens	98.773	Midori2	GCGGTTATACGATTAACCCAAGTCAATAGAAGCCGGCGTAAAGAGTGTTTTAGATCACCCCCTCCCCAATAAAGCTAAAACTCACCTGAGTTGTAAAAAAACTCCAGTTGACACAAAATAGACTACGAAAGTGGCTTTAACATATCTGAACACACAATAGCTACC	23	57	15	26	37	12	29	23	11	43	29	20	12	35	43	73	12	12	144	92	26	42	289	248	207	175	60	4	34	39	48	25	71	29	39	20	23	58	2	25
OTU_517	Chordata	Actinopteri	Cypriniformes	Leuciscidae	Rutilus		95.322	Midori2	GCGGTTAAACGAGAGGCCCTAGTTAATAATACACGGCGTAAAGGGTGGTTAAGGGAAGCACAATAATAAAGCCAAATGGCCCTTTGGCTGTCATACGCTTCTAGGTGTCCGAAGCCCTAATACGAAAGTAACTTTAATAAACCCTGACCCCACGAAAGCTGAGAAA	94	222	72	131	50	110	171	164	184	280	127	443	531	284	256	184	342	336	196	211	14	0	29	13	80	173	31	75	52	70	136	89	211	209	54	91	96	63	0	0
OTU_518	Chordata	Actinopteri	Anguilliformes	Anguillidae	Anguilla	Anguilla anguilla	98.81	manual check	GCGGTTATACGAGGGGCTCAAATTGATATTACACGGCGTAAAGCGTGATtaaaaaacaaaaaactaaagccaaaaCACTTCCCAAGCTGTCATACGCTACCGGAACATAAACGAAGCCCTATAACGAAAGTAGCTTTAACACCTTTGAACTCACGACAGTTGAGGAA	0	0	0	0	0	0	0	0	0	0	0	0	0	0	0	0	0	0	0	0	0	0	0	0	0	0	0	0	0	0	0	0	0	0	0	0	0	0	0	0
OTU_519	Chordata	Actinopteri	Cypriniformes	Leuciscidae	Leuciscus		96.532	Midori2	GCGGTTAAACGAGAGGCCCTAGTTAATAATACACGGCGTAAAGGGTGGTTAAGGAAAGCACAATAATAAAGCCAAAATGGCCCTTTTGGCTGTCATACGCTTCTAGGTGTCCGAAGTTCAACATACGAAAGTAGCTTTAATAACGCCCACCTGACCCCACGAAAGCTGAGAAA	0	5	2	2	6	0	0	1	0	0	9	3	1	3	1	2	0	2	0	0	0	0	0	0	0	0	4	0	2	0	3	2	7	8	0	1	1	2	0	0
OTU_520	Chordata	Actinopteri	Cypriniformes	Leuciscidae	Leuciscus	Leuciscus leuciscus	97.076	Midori2	GCGGTTAAACGAGACCCCTAGTTAACAATACACGGCGTAAAGGGTGGTTAAGGAAAGCACAATAATAAAGCCAAATGGCCCTTTGGCTGTCATACTCTTCTAGGTGTCCGAAGCCCAATATACGAAAGTAGCTTTAATAACGCCCACCTGACCCCACGAAAGCTGAGAAA	1	0	3	0	0	0	0	0	0	0	0	0	1	1	0	0	0	1	0	0	0	0	0	0	0	0	0	0	0	2	1	2	6	0	0	0	2	8	0	0
OTU_521	Chordata	Actinopteri	Perciformes	Percidae	Perca	Perca fluviatilis	97.561	Midori2	GTGGTTATACGAGAGGCCCAAGTTGATAGACATCGGCGTAAAGCGTGGTTAAGATTAAAGATAGTACTAAAGCCGAACACCTTCAGAGCTGTTATACGCATCCGAAGGTAAGAAGTTCAATTACGAAAGTGGCTTTATAGCCCCTGAACCCACGAAAGCTACGATA	0	0	0	1	0	1	0	0	0	3	0	1	0	0	0	0	1	0	0	0	0	0	0	0	0	1	0	1	1	1	0	0	0	0	2	0	0	0	0	0
OTU_522	Chordata	Actinopteri	Perciformes	Percidae	Perca		95.783	Midori2	GCGGTTATACGAGAGGCCCAAGTTGATAGACATCGGCGGCGTGGTTAAGATTAAAGACAATACTAAAGCCGAACACCTTCAGAGCTGTTATACGCACCCGAAGGTAAGAAGTTCAACCACGAAAGTGGCTTTATTACCCCTGAACCCACGAAAGCTACGATA	6	8	1	2	0	0	6	3	6	1	4	3	0	1	1	5	6	2	8	2	1	0	1	0	2	1	4	1	1	3	3	1	6	0	5	0	0	1	0	0
OTU_523	Chordata	Actinopteri	Cypriniformes	Leuciscidae	Abramis		95.93	Midori2	GCGGTTAAACGAGAGGCCCTAGTTAATAATACACGGCGTAAAGGGTGGTTAAGGAAAGCATAACAATAAAGCCGAATGGCCCTTTGGCTGTCATACGCTTCTAGTTGTCCGAAGTTCAACATACGAAAGTAGCTAATAACGCCCACCTGACCCCACGAAATCTGAGAAA	1	1	1	1	0	2	2	0	0	4	2	1	2	1	1	1	3	5	1	2	1	1	0	1	0	1	8	2	1	0	4	0	7	6	1	1	0	1	0	0
OTU_524	Chordata	Actinopteri	Cypriniformes	Leuciscidae	Leuciscus	Leuciscus leuciscus	97.076	Midori2	GCGGTTAAACGAGAGGCCCCAGTTAATAATACACGGCGTAAAGGGTGGTTAAGGAGACATAACAATAAAGCCAAATTGCCCTTTGGCTGTCATACGCTTCTAGGTGTCCGAAGCCCAATATCGAAAGTAGCTTTAATAAAGCCCACCTGACCCCACGAAAGCTGAGAAA	0	0	0	2	0	0	0	0	0	0	0	0	25	12	62	28	0	1	35	22	3	0	1	0	0	0	0	2	0	0	1	0	2	0	0	1	0	1	0	0
OTU_525	Chordata	Actinopteri	Gobiiformes	Gobiidae	Neogobius	Neogobius melanostomus	97.561	Midori2	GCGGTTATACGAGAGGCCCATTTGACAAAAATCGGCGAAAAGCGTGGTTAGTGATATCACCTCCACTAAAGCCAAACACCTTCAAGGCTGTAATACGCCCCCAAGACAGGAAGCCCAATCACGAAAGTAGCTTTAATTTTCATGAAGCCACGAAAGCTACGATA	1	0	0	0	0	0	0	0	1	0	0	0	0	0	0	0	0	0	0	0	0	1	1	1	0	0	0	0	0	0	0	1	1	0	0	0	0	0	0	0
OTU_526	Chordata	Actinopteri	Perciformes	Gasterosteidae	Gasterosteus	Gasterosteus aculeatus	98.795	Midori2	GCGGTTATACGAGAGGCCCAAGTTGATGAATTACGGCGTAAAGAGTGGTTAAGCTAAAATTAAAACTAAAAGCCGAACACCCCAAAGCTGTTATACGCATCCGGAGGTGAGAAGTTCAACCACGAAGGTGGCTTTATCTAACCTGAACCCACGAAAGCTACGGCA	5	2	3	3	0	2	1	3	0	3	1	0	0	4	3	1	1	0	1	1	0	4	1	5	1	0	0	2	4	0	1	0	2	2	2	0	22	7	2	0
OTU_527	Chordata	Actinopteri	Gobiiformes	Gobiidae	Neogobius		96.988	Midori2	GCGGTTATACGAGAGGCCCAAGTTAAAAAAATCGGCGAAAAGCGTGGTTAGTGATATCACCTCCACTAAAGCCAAACACCTTCAAGGCTGTAATGCCCCCGGAGACAGGAAGCCCAATCACGAAAGTAGCTTTAATTTTCATGAAGCCACGAAAGCTAGGAAA	0	0	0	0	0	0	0	0	0	0	0	0	0	0	0	0	0	0	0	0	0	0	0	0	0	0	0	0	0	0	0	0	0	0	0	0	0	0	0	0
OTU_528	Chordata	Actinopteri	Cypriniformes	Leuciscidae	Rutilus		96.491	Midori2	GCGTTTAAGCGAGAGGCCCTAGTTAATAATACACGGCGTAAAGGGTGGTTAAGGGGCACAATAATAAAGCCAAATGGCCCTTTGGCTGTCATACGCTTCTAGGTGTCCGAAGCCCAATATACGAAAGTAGCTTTAAAAGCCCACCTGACCCCACGAAAGCTGAGAAA	4	3	1	2	33	14	26	3	40	41	38	217	26	0	1	10	94	34	4	4	81	1	1	2	6	1	0	1	0	24	2	21	2	23	28	20	19	2	0	0
OTU_529	Chordata	Actinopteri	Perciformes	Percidae	Perca		96.386	Midori2	GCGGTTAAACGAGAGGCCCTAGTTAATAGACATCGGCGTAAAGCGTGGTTAAGATTAAAGACAATACTAAAGCCGAACACCTTCAGAGCTGTTATACGCACCCGAAGGTAAGAAGTTCAACCACGAAAGTGGCTTTATTACCCCTGAACCCACGAAAGCTACGATA	5	9	0	3	2	0	0	3	3	5	9	8	8	0	1	26	7	6	10	3	4	0	0	2	2	1	4	6	0	2	4	7	7	3	0	3	1	0	0	0
OTU_530	Chordata	Actinopteri	Cypriniformes	Leuciscidae			97.093	Midori2	GCGGTTAAACGAGAGGCCCTAGTTAATAATACACGGCGTAAAGGGTGGTTAAGGAAAACATAACAATAAAGCCAAATGGCCCTTTGGCCGTCATACGCTTCTAGGTGTCCGAAGCCCGATCATACGAAAGTAGCTTTAACAAAGCCCACCTGACCCCACGAAAGCTGAGAAA	3	7	117	1	0	0	2	93	0	0	3	4	54	9	0	0	1	1	3	0	1	6	0	4	0	0	8	0	3	0	0	0	5	1	1	0	0	0	0	0
OTU_531	Chordata	Actinopteri	Gobiiformes	Gobiidae			92.073	Midori2	GCGGTTATACGAGAGGCCCAAGTTGATAGACATCGGCGTAAAGCGTGGTTAGTGATATCACCTCCACTAAAGCCAAACACCTTCAAGGCTGTAATACGCCCCCGAAGACAGGAAGCCCAATCACGAAAGTGGCTTTATAGCCCCTGAACCCACGAAAGCTACGATA	109	166	60	65	30	40	92	67	66	40	49	59	102	110	105	118	124	88	85	63	9	51	60	40	91	49	83	81	65	55	57	56	109	93	66	74	52	48	0	0
OTU_532	Chordata	Aves	Passeriformes	Turdidae	Turdus	Turdus philomelos	99.438	Midori2	GCGGTCATACAGGAGGCTCAAATTAACTTTATAACGGCGTAAAGAGTGGTCGCATGTTATCCAAGTAGCTAAGATTAAAAACAACTGAGCTGTCATAAGCCCAAGATGCCCATAAGGCCTCCGTCTTCAAAGAAGATCTTAGAACAACGATTAATTGAAGCCACGAAAGCCAGGACC	0	0	0	0	0	0	0	0	0	0	0	0	0	0	0	0	0	0	0	8	0	0	0	0	0	0	7	43	0	0	0	0	0	0	0	0	0	0	0	0
OTU_533	Chordata	Actinopteri	Cypriniformes				96.491	Midori2	GCGGTTAGACGAGAGGCCCTAGTTGATATTACAACGGCGTAAAGGGTGGTTAAGGAAAGTATTAACAATAAAGTCAAATGGCCCCTTGGCCGTCATACGCTTCTAGGAGTCCGAAGCCCTAATACGAAAGTAACTTTAATAAACCCACCTGACCCCACGAAAGCTGAGAAA	0	14	3	15	3	0	0	1	2	2	0	15	5	1	13	2	7	4	1	2	1	0	0	0	0	3	1	0	1	0	2	1	9	1	1	1	0	0	0	0
OTU_534	Chordata	Actinopteri	Gobiiformes	Gobiidae	Neogobius		96.988	Midori2	GCGTTTATACGAGAGGCCCAAGTTGACAAAAATCGGCGAAAAGCGTGGTTAGTGATATCACCTCCAAAAAGCCAAACACCTTCAAGGCTGTAATACGCCCCCGAAGACAGGAAGCCCAATCACGAAAGTAGCTTTAATTTTCATGAAGCCACGAAAGCTGAGAAA	7	22	8	14	7	7	11	2	6	6	8	12	8	10	15	9	16	15	14	5	3	2	1	7	9	12	17	11	8	2	13	8	20	15	9	5	9	5	0	1
OTU_535	Chordata	Actinopteri	Cypriniformes	Leuciscidae	Abramis	Abramis brama	98.182	Midori2	TCGGTTAAACGAGAGGCCCCAGTTAATAATACACGGCGTAAAGGGTGGTTAAGGAAAGTATTAACAATAAAGCCGAATGGCCCTTTGGCTGTCATACGCTTCTAGTTGTCCGAAGTTCAACATACGAAAGTAGCTAATAACGCCCACCTGACCCCACGAAAGCTACGATA	0	0	0	0	0	1	0	0	0	0	0	0	0	1	0	0	0	0	0	1	0	0	0	0	1	0	0	0	0	0	0	0	0	0	0	0	0	0	0	0
OTU_536	No Match	No Match	No Match	No Match	No Match	No Match	No Match	Midori2	GCTCAAACAGGCCGCTGTAGCCCACGCCCATGATGAGCAAACCACTCACGATGAAGGCCCCCGTGGCTTCGGGCAGGGTCACGCCCTGCGTCACGGCCAACACCGCCGCACCGGGCGTTGACCAGGCCGTCAACACCGGTTGCCGGTACCAAAGGCTCAAGAC	0	5	3	0	0	0	0	0	0	0	0	0	0	0	0	1	0	0	0	0	1	35	0	0	7	0	0	0	0	0	0	0	0	0	0	0	0	1	0	0
OTU_537	No Match	No Match	No Match	No Match	No Match	No Match	No Match	Midori2	CTCAACGTCCCTCCACCCAACAAGCGACGCACCTGTACGAAATTCAATCGGAAAAAGAAGATTAAAATCTCTCCCCAAGACATCACCTCCGTCCTATTACACCTCCACAAAGCAAAAGCACCAGGCCTACGATACAAGTAGACTCCCTTGACATCTTCAT	0	0	0	0	0	0	0	0	0	0	0	0	0	0	0	2	0	0	0	13	0	0	3	9	0	0	0	0	0	0	0	0	0	0	0	0	28	0	0	0
OTU_538	Chordata	Actinopteri	Gobiiformes	Gobiidae	Neogobius		96.988	Midori2	GCGGTTATACGAGAGGCCCAAGTTGACAAAAATCGGAAAAGGCGTGGTTAGTGATATCACCTCCACTAAAGCCAAACACCTTCAAGGCTTTAATACGCCCCCGAAGACAGGAAGCCCAATCACGAAAGTAGCTTTAATTTTCATGAAGCCACGAAAGTTAGGAAA	1	0	0	0	2	1	0	0	0	1	1	0	1	0	1	0	0	0	1	0	0	0	0	0	0	0	0	0	1	1	0	0	0	0	0	2	0	0	0	0
OTU_539	Chordata	Actinopteri	Perciformes	Percidae	Perca		96.988	Midori2	GCGGTTAGACGAGAGGCCCAAGTTGATAGACATGGGCGTAAAGCGTGGTTAAGATTAAAGACAATACTAAAGCCGAACACCTTCAGAGCTGTTATACGCATCCGAAGGTAAGAAGTTCAACCACGAAAGTGGCTTTATAGCCCCTTAACCCACGAAAGCGACCATA	2	1	0	1	0	0	0	0	0	1	2	0	1	2	1	0	0	0	0	0	0	0	0	1	1	1	0	0	0	0	0	0	1	0	0	1	0	0	0	0
OTU_540	Chordata	Mammalia					76.774	Midori2	ACATCCGTGCAATTAATCCAAACTAATAAAACCCAACATAAAGCGTGTTAAAGGTAACTCTCTTAACAAAGTTAAACTTTAACTAAGCTGCAAACAGCTCCAGCTGAAATAACAACAAACTATGAAAGTGACTTTCATAGTATCATGAGAACACAATAGCTAATGCC	0	0	0	0	0	0	0	0	0	0	0	0	0	0	0	0	0	0	0	0	0	0	0	0	0	21	0	0	0	0	0	0	0	0	0	0	0	29	0	0
OTU_541	No Match	No Match	No Match	No Match	No Match	No Match	No Match	Midori2	CTTACGCCCACGGTGTGCTTGGGTGTCGGGGTCACCCTCAAACCCTTCTAGGATGTTGTAGGCCTCTAACCCCAGCTCGGTGGCACGTTTGGCCGCTGCTATTGAGCGCACACCACTGCGGCATAAAAACAGCACTTTTTGCCCTTGGGGCACAGCATCTTGCACAGCTGCAT	0	0	0	0	0	0	0	0	0	0	0	0	0	0	0	0	44	0	0	0	0	0	0	0	0	0	0	0	0	0	0	0	0	6	0	0	0	0	0	0
OTU_542	Chordata	Actinopteri	Gobiiformes	Gobiidae	Neogobius		96.988	Midori2	GCGGTTATACGAGAGGCCCAAGTTGACAAAAATCGGCGAAAAGCGTGGTTAGTGATATCACCTCCACTAAAGCCATACCTTCAAGGCTGTAATACGCCCCCGAAGACAGGAAGCCCAATCACGAAAGTAGCTTTAATTTTCATGAAGCCACGAAAGCTGAGAAA	18	29	25	24	27	26	24	32	27	28	44	45	44	34	32	29	39	43	42	29	25	20	15	15	26	35	51	43	15	11	42	35	43	38	21	33	21	26	0	4
OTU_543	Chordata	Actinopteri	Gobiiformes	Gobiidae	Neogobius		96.988	Midori2	GCGGTTATATGAAGGCCCAAGTTGACAAGAATCGGCGAAAAGCGTGGTTAGTGATATCACCTCCACTAAAGCCAAACACCTTCAAGGCTGTAATACGCCCCCGAAGACAGTAAGCCCAATCACGAAAGTAGCCTTAATTTTCATGAAGCCACGAAAGCTAGGAAA	0	0	0	0	0	1	0	0	0	0	0	0	0	0	0	2	0	0	0	0	0	0	0	1	3	0	0	0	0	0	0	0	0	2	1	0	0	0	0	1
OTU_544	No Match	No Match	No Match	No Match	No Match	No Match	No Match	Midori2	AGCGGCCTGACTCACAGGCTTGCATTCAGTTCAACCATTTCATTGCCGCTTTTCTGCATGCTTCGACCGTTTTTGCGTCAGGCATGCTGCCGTTTGCGGAATCCTCGTCTGTGGTCACTTCCCCATTTGCCTCGACCCAAAAACCCCATCCGCCGTCGTATTTTGGCG	0	0	0	0	0	10	0	0	0	0	0	0	0	0	0	0	2	2	0	0	0	33	0	0	0	0	1	11	0	0	0	0	0	0	0	0	0	0	0	0
OTU_545	Chordata	Actinopteri	Cypriniformes	Cyprinidae	Barbus		95.858	Midori2	GCGGTTATACGAGAGGCCCAAGTTGATATTATAACGGCGTAAAGGGTGGTTAGGGATAAATAATAATAAAGCCAAATGGCCCCTTGGCCGTCATACGCTTCTTGTCCGAGGCCCTATATACGAAAGTAGCTTTAATTAACCCGCCTGACCCCACGAAAACTGAAAA	35	71	183	125	57	32	203	114	108	26	106	57	138	84	110	174	82	57	47	77	1	69	188	246	102	81	130	167	72	54	162	107	43	101	76	75	94	111	0	0
OTU_546	No Match	No Match	No Match	No Match	No Match	No Match	No Match	Midori2	ATTAGTCATGGTTGCCGTGCGAATCTTGGTCTATGCCGCCTTGGGAATGATCAGCCCGCCTTGATTGCGCACGGGACAACGACAATCACAGGCGTCGCGCGACCTATACCTAAAAGGTATCGCGCATGCACCCAACGAAGTATTTCCTCAAATGCGCAATATCGGG	0	0	0	0	0	0	0	0	0	0	0	51	0	0	0	0	0	0	0	0	0	0	0	0	0	0	0	0	0	0	0	0	0	0	0	0	0	0	0	0
OTU_547	No Match	No Match	No Match	No Match	No Match	No Match	No Match	Midori2	GCCAGAATAAACGAAAATTCACCAACCTGTGCCAAGCCAATCGCGGCGATCAGCGCAACGCGCAGACTGCCCATAACGGCGTAGGCCACCACCCCCATCACCACGAATTTTAGAATAACCACCGAGACCACACCGCCCGCGGTCAGCCACGGTTGTGCCCACCA	0	0	0	16	0	0	8	1	0	0	0	0	0	0	1	3	1	0	8	0	0	0	1	0	0	3	0	15	0	0	0	0	0	0	0	1	0	0	0	0
OTU_548	Chordata	Actinopteri	Gobiiformes	Gobiidae	Neogobius		96.988	Midori2	GCGGTTATACGAGAGGCCCAAGTTGACAAAAATCGGCGAAAAGCGTGGTTAGTGATATCACCTCCACTAAAGCCAAACACCTTCAAGGCTGTAACACGCCCCCGAAGACAGGAAGCCCAATCACAAAAGTAGCCTTTTTTCATGAAGCCACGAAAGCTAGGAAA	6	3	3	16	8	6	3	1	3	8	2	4	2	3	11	8	0	4	2	3	1	4	3	5	5	5	9	3	3	0	15	5	10	4	1	2	6	4	0	3
OTU_549	Chordata	Mammalia	Rodentia	Myocastoridae	Myocastor	Myocastor coypus	97.561	Midori2	GCGGTCATACGATTAACCCTGATTAATAAACCCCGGCGTAAAGAGTATTAAAGATACAAAAAATAAGATTAAATTTCATCTGGGTCGTAAAAACCTATAGATAAAAATAAAATCGATAACGAAGGTAATCTTAATATATCAGAATATACTAAACTAAGACA	0	5	0	26	9	0	0	0	0	0	0	0	0	4	0	7	3	0	0	0	0	0	11	2	0	0	0	5	0	0	5	0	0	3	0	0	6	0	0	0
OTU_550	Chordata	Actinopteri	Cypriniformes				94.737	Midori2	GCGGTTAAACGAGAGGCCCTAGTTAATAATACACGGCGTAAAGGGTGGTTAGGGATAAATAATAATAAAGCCAAATGGCCCCTTGGCCGTCATACGCTTCTAGGTGTCCGAGGCCCTATATACGAAAGTAGCTTTAATAACGCCCACCTGACCCCACGAAAGCTGAGAAA	0	3	9	7	1	5	8	8	6	0	7	10	14	12	7	10	13	5	4	9	0	0	5	10	7	7	16	20	4	2	23	6	11	6	2	0	4	6	0	0
OTU_551	Chordata	Actinopteri	Gobiiformes	Gobiidae	Ponticola		96.951	Midori2	GCGGTTATACGAGAGGCCCGAGTTGACAAACATTCGGCGTAAAGCGTGGTTAACTTATTTACTAAAGCCAAACACCTTTAAGGCTGTTATACGCCCCCAAAGGTAGGAAGACCCCTCACGAAAGTAGCTTTAATTACTATGAATCCACGAAAGCTGAGAAA	1	1	0	7	0	1	0	5	0	5	1	1	3	1	0	1	0	2	2	5	2	0	1	2	4	7	0	3	0	0	6	0	1	2	3	1	1	1	0	0
OTU_552	Chordata	Actinopteri	Cypriniformes	Leuciscidae	Squalius	Squalius cephalus	97.076	Midori2	GCGGTTAAACGAGAGACCCTAGTTAATAATACACGGCGTAAAGGGTGGTTAAGGAAGACATAACAATAAAGCCGAATGGCCCTTTGGCTGCCATACGCTTCTAGGTGTCCGAAGCCCAATATACGAAAGTAGCTTTAATAAAGTCCACCTGACCCCACAAAAGCTGAGAAA	16	18	7	45	7	53	11	11	10	35	23	18	7	18	4	8	16	15	12	24	6	0	8	10	9	6	26	604	21	11	15	5	23	13	11	13	67	11	0	0
OTU_553	Chordata	Actinopteri	Cypriniformes				95.266	Midori2	GCGGTTAGACGAGAGGCCCTAGTTGATATTACAACGGCGTAAAGGGTGGTTAAGGATAAAAATAAAGTCAAATGGCCCCTTGGCCGTCATACGCTTCTAGGAGTCCGAAGCCCTAATACGAAAGTAGCTTTAATTAACCCGCCTGACCCCACGAAAACTGAGAAA	18	23	116	71	20	12	146	110	49	34	74	79	118	72	89	91	63	59	56	50	0	0	33	33	62	35	57	73	30	14	95	46	47	41	29	21	36	17	0	0
OTU_554	Chordata	Actinopteri	Cypriniformes	Leuciscidae	Chondrostoma	Chondrostoma nasus	97.661	Midori2	GCGGTTAAACGAGAGGCCCTAGTTAATAATACACGGCGTAAAGGGTGGTTAAGGAAAGCATGACAATAAAGCCGAATGGCCCTCTGGCTGTCATACGCTTCTAGGTGTCCGAAGCCCGTTATACGAAAGTAGCTTTAACAACGCCCACCTGACCCCACGAAAGCTGAGAAA	0	0	0	2	0	0	0	0	0	0	0	0	0	0	0	0	0	6265	0	0	1	164	0	0	0	0	0	0	0	0	27	0	26	0	0	0	0	0	0	0
OTU_555	Chordata	Actinopteri	Cypriniformes	Leuciscidae	Leuciscus		95.152	Midori2	GCGGTTAAACGAGAGGCCCTAGTTAATAATACACGGCGTAAAGGGTGGTTAAGGAAAGCATAACAATAAAGTCAAATGGCCCCTTGGCCGTCATACGCTTCTAGGAGTCCGAAGCCCTAATACGAAAGTAACTTTAATAAACCCACCTGAACCCACGAAAGCTACGATA	18	69	26	92	8	35	19	26	18	59	42	150	58	90	61	41	42	95	98	31	4	0	8	3	22	41	54	39	7	9	37	30	89	24	19	19	7	7	0	0
OTU_556	Chordata	Actinopteri	Gobiiformes	Gobiidae			90.533	Midori2	GCGGTTATACGAGAGGCCCAAGTTGACAAAAATCGGCGAAAAGCGTGGTTAGTGATATCACCTCCACTAAAGCCAAACACTTCCCAAGCTGTCATACGCTACCGGAACATAAACGAAGCCCTATAACGAAAGTAGCTTTAATTTTCATGAAGCCACGAAAGCTAGGAAA	0	0	0	0	0	0	0	0	0	0	0	0	0	0	0	0	0	0	0	0	0	0	0	0	0	0	2	0	0	0	0	0	0	0	0	0	0	0	0	0
OTU_557	Chordata	Actinopteri	Anguilliformes	Anguillidae	Anguilla		96.45	Midori2	GCGGTTATACGAGGGGCTCAAATTGATATTACACGGCGTAATGCGTGATTaaaaaaacaaaaaaaaCTAAAGCCAAACACTTCCCAAGCTGTCATACGCTACCGGAACATAAACGAAGACCTATAACGAAAGTAGCTTTAACACCTTTGAACTCACGACGGTTGAGGAA	0	2	0	0	0	0	0	0	0	27	0	0	0	0	0	0	1	0	0	5	0	0	0	24	0	0	0	11	1	7	2	13	17	0	4	0	0	10	0	0
OTU_558	Chordata	Actinopteri	Cypriniformes				95.266	Midori2	GCGGTTAAACGAGAGGCCCCAGTTAATAATACACGGCGTAAAGGGTGGTTAAGGATAAACAAAAATAAAGTCAAATGGCCCCTTGTCCGTCATACGCTTCTAGGAGTCCGAAGCCCTAATACGAAAGTAACTTTAAAACCCACCTGACCCCACGAAAGCTGAGAAA	0	8	5	7	8	4	4	5	0	8	5	7	9	6	9	6	8	7	9	6	1	0	0	0	1	6	7	3	5	2	7	6	8	9	7	5	2	2	0	0
OTU_559	Chordata	Actinopteri	Perciformes	Percidae	Perca		95.181	Midori2	GCGGTTATACGAGAGGCCCAAGTTGACAAAAATCGGCGAAAAGCGTGGTTAAGATTAAAGACAATACTAAAGCCGAACACCTTCAGAGCTTACGCATCCGAAGGTAAGAAGTTCAACCACGAAAGTGGCTTTATAGCCCCTGAACCCACGAAAGCTACGATA	5	4	4	5	3	6	1	2	5	5	9	6	4	6	4	11	4	0	3	1	0	4	6	2	8	1	4	6	4	7	8	3	8	6	3	6	4	1	0	0
OTU_560	Chordata	Actinopteri	Cypriniformes	Tincidae	Tinca		96.532	Midori2	GCGGTTAAACGAGAGGCCCTAGTTGATATTACTACGGCGTAAAGGGTGGTTAAGGAAAGCATTATAATAAAGCCAAATGGCCCCTTGGCCGTCATACGCTTCTAGTGCCCGAAGCCCAATATACGAAAGTAGCTTTAATAAAGTCCACCTGACCCCACGAAAGCTGAGAAA	0	97	0	37	0	0	0	0	0	0	0	26	0	0	17	0	0	0	0	0	0	0	0	17	0	0	10	0	0	0	0	10	58	0	0	0	0	0	0	0
OTU_561	Chordata	Actinopteri	Gobiiformes	Gobiidae	Neogobius		96.988	Midori2	GCGGTTAGACGAGAGGCCCAAGTTGACAAAAATGGGCGAAAAGCGTGGTTAGTGATATCACCTCCACTAAAGCCAAACACCTTCAAGGCTGTAATACGCCCCCGAAGACAGGAAGCCCAATCACGAAAGTAGCTTTAATTTTCATTAAGCCACGAAAGCGAGTAAA	2	3	0	0	2	4	1	1	1	0	1	0	0	0	0	3	1	1	0	0	0	0	2	1	1	0	2	0	1	2	0	0	2	0	1	1	0	3	0	1
OTU_562	No Match	No Match	No Match	No Match	No Match	No Match	No Match	Midori2	AACGGTGTTGTCATTGCCAGTGACTGAACCCACCATGATGACTCTGGCCTTATCCGCTTCTTTCAAGTCGTTCATCAACAAACTCGTCAACAAGAATTGTGACAAGAAATTAATCTGTAGCTGTTGTTCATGACCATCTACAGTCCACTTTGCTTCCTT	0	0	0	0	0	0	0	0	0	0	0	0	0	0	0	0	0	0	0	0	0	0	6	0	0	0	0	1	1	33	0	0	0	0	0	0	0	0	0	0
OTU_563	No Match	No Match	No Match	No Match	No Match	No Match	No Match	Midori2	GGCGACCACCGAGGCGAGGAAGAACATACCGCTACTCATATGCCCAGCCGGCCGGCTGGGCGCTTTGCCCCAGCTGTACTCCTTCATGCCCGCTGCCTCATGAAACAAACCGCCCTGCTTGAGCTGCAACCGGTAGGCGTCAAACAGTTCGTAGTTCG	0	0	0	0	0	0	0	0	0	0	0	0	0	0	0	0	39	0	0	0	0	0	0	0	0	0	0	0	0	0	0	0	0	0	0	0	0	0	0	0
OTU_564	No Match	No Match	No Match	No Match	No Match	No Match	No Match	Midori2	CCCTATCGCCACATTTAAGATGATGAAGAAGCCATGCTGAGTGGCATTCTCCCAGGTCGCCGCGTCCATTTGGTCTGACTTCACACTGTGGAACTGCACCCCATCCAAATACCAGCGTAACTCTTGCGGCGAAACGCTCTTATCAAACTCCAAGCGATAGGTATGGAAAGCCGTTTG	0	0	0	0	0	0	0	0	0	0	0	0	0	0	0	0	0	48	0	0	0	0	0	0	0	0	0	0	0	0	0	0	0	0	0	0	0	0	0	0
OTU_565	Chordata	Actinopteri	Perciformes	Percidae	Sander		96.364	Midori2	GCGGTTATACGAGAGGCCCAAGTTGATAGACATCGGCGTAAAGCGTGGTTAAGACAAAAACAAAACTAAAGCCGAACACCTTCAGAGCTGTTATACGCATCCGAAGGTAAGAAGTTCAACCACAAAAGTGGCTTTATAGCCCCCAACCCACGAAAGCTACGATA	1	2	2	1	0	0	0	0	0	0	0	0	0	1	1	2	3	3	0	0	0	0	0	0	0	0	0	0	2	1	0	1	0	0	0	0	0	0	0	0
OTU_566	Chordata	Actinopteri	Perciformes	Percidae	Perca		96.364	Midori2	TCGGTTATACGAGAGGCCCAAGTTGATAGACATCGGAAAAGCGTGGTTAAGATTAAAGACAATACTAAAGCCGAACACCTTCAGAGCTGTTATACGCACCCGAAGGTAAGAAGTTCAACCACGAAAGTGGCTTTATTACCCCTGAACCCACGAAAGCTACGATA	1	2	0	0	0	1	1	0	0	0	2	0	1	0	1	1	3	4	1	0	0	0	1	0	2	0	3	0	0	1	0	0	2	0	2	1	1	1	0	0
OTU_567	No Match	No Match	No Match	No Match	No Match	No Match	No Match	Midori2	ACAGCACCAACTTGCTCGCTCGGTCGCGACGCAGTGCGGCTACCAATGCGCCGAGGAGGAGAAACGGGGCGTAGAATAGATACAGTTCGCCGAAGCCGCGCACCGCGTGGCGGCTGATGGCATCGCCACTCTGGAACAAGAAGTGCGGTGAAAAGAACGCCTGATAGTTGTGCG	0	0	0	0	0	0	0	0	0	0	0	0	0	0	9	0	0	0	0	10	0	0	17	0	0	0	0	0	0	0	0	3	0	0	0	6	0	0	0	0
OTU_568	Chordata	Mammalia	Primates	Hominidae	Homo	Homo sapiens	99.401	Midori2	GCGGTCACACGATTAACCCAAGTCAATAGAAGCCGGCGTAAAGAGTGTTTTAGATCACCCCCTCCCCAATAAAGCTAAAATTCACCTGAGTTGTAAAAAACTCCAGTTGATACAAAATAAACGACGAAAGTGGCTTTAACGCATCTGAACACACAATAGCTAAGACC	0	9	0	0	0	0	0	0	0	26	0	0	0	0	0	0	0	0	0	70	0	0	0	0	0	54	0	0	0	0	0	0	0	6	0	0	0	0	0	0
OTU_569	Chordata	Aves	Galliformes	Phasianidae	Meleagris		96.61	Midori2	GCGGTCATACAAGAAACCCAAATCAATAGCCATCCGGCGTAAAGAGTGGTCACATGCTATCTATACCAATTAAGATCAAAGTGTAACTAAGCTGTCATAAGCCCAAGATTCACCTAAGCCTAAAAAACGATCTTAACTTAACGATCAATTTAAAGCCACGAAAGCCAGGGCA	0	0	0	0	0	0	0	0	0	0	0	0	0	0	0	0	0	0	0	0	0	0	0	0	0	0	0	0	0	0	0	0	0	0	0	0	1	0	0	0
OTU_570	Chordata	Actinopteri	Gobiiformes	Gobiidae			93.373	Midori2	GCGGTTATACGAGAGGCCCAAGTTGACAAAAATCGGCGAAAAGCGTGGTTAGTGATATCACCTCCACTAAAGCCAAACACCTTCAAGGCTGTAATACGCCCCCGAAGGTAGGAAGACCCCTCACGAAAGTAGCTTTTACTATGAATCCACGAAAGCTAGGAAA	32	26	62	103	9	8	30	17	12	61	30	20	21	49	16	34	38	66	34	19	27	0	56	37	34	27	30	11	19	35	48	19	30	30	41	33	27	32	0	0
OTU_571	Chordata	Actinopteri	Cypriniformes	Leuciscidae	Leuciscus		95.906	Midori2	GCGGTTAAACGAGAGGCCCTAGTTGATATTACTACGCGTAAAGGGTGGTTAAGGAAAGCATTATAATAAAGCCAAATGGCCCTTTGGCTGTCATACGCTTCTAGGTGTCCGAAGCCCAATATACGAAAGTAGCTTTAATAAAGCCCACCTGACCCCACGAAAGCTGAGAAA	0	91	0	26	0	0	0	0	0	0	0	36	0	0	21	1	4	1	0	0	0	0	0	23	0	0	7	0	0	0	0	15	47	1	0	0	0	0	0	0
OTU_572	Chordata	Actinopteri	Cypriniformes	Cyprinidae	Capoeta		95.266	Midori2	GCGGTTAGACGAGAGGCCCTAGTTGATATTACAACGGCGTAAAGGGTGGTTAAGGATAAACAAAAATAAAGCCAAATGGCCCCTTGGCCGTCATACGCTTCTTGTCCGAGGCCCTATATACGAAAGTAGCTTTAATTAACCCGCCTGACCCCACGAAAACTGAAAA	0	1	2	1	0	0	0	1	0	0	1	1	3	1	0	0	0	2	0	0	0	0	0	1	0	0	8	0	0	0	1	1	0	1	0	0	0	0	0	0
OTU_573	Chordata	Mammalia	Rodentia	Cricetidae	Microtus	Microtus arvalis	98.113	Midori2	GCGGTCATACGATTAACCCAAACTAATTATTCTCGGCGTAAAACGTGTTACTAGAAATATCAAAATAGAATTAAAATCCATCCATATGTGAAAATTCATCGCTGGACCTAAAACCAATGACGAAAGTAATTCTAATAAGCCTGATACACGAAAGCTACGATA	0	0	0	0	0	0	0	0	0	0	0	0	0	0	0	0	0	0	0	0	0	0	0	0	0	0	0	0	0	0	0	0	0	0	0	0	0	0	0	0
OTU_574	No Match	No Match	No Match	No Match	No Match	No Match	No Match	Midori2	TCCCGATGGAGATCGACGGCGTCGTCCAGACCGCTTCGGAATCGGGGGGGCAGAGAGCCTGGCATTGGCGGGACGCTTTGGTCGCACCGTCGATGCCTCCTGCCTGCCTGAGGTGTGACGTGGTGCTTGGGGCCCATTTGTGGGCCTCTTTCAATGGCATCGG	24	0	0	0	0	0	0	0	0	0	0	16	0	0	0	0	0	0	0	0	0	0	0	0	0	0	0	0	0	0	0	0	0	1	0	0	0	0	0	0
OTU_575	Chordata	Aves	Passeriformes	Motacillidae	Motacilla		99.438	Midori2	GCGGTCATACAGGAGACCCAAATTAACATTATAACGGCGTAAAGAGTGGTCACATGCTATCCAAGTAACTAAGATTAAAAACAACTGAGCTGTCGCAAGCCCAAGATGTCAATAAGGCCACCTTATTAAAGAAGATCTTAGAACAACGATTAATTGAACTCCACGAAAGCCAGGGCC	0	0	23	0	0	0	0	0	0	0	0	0	0	0	18	0	0	0	0	0	0	0	0	0	0	0	0	0	0	0	0	0	0	0	0	0	0	0	0	0
OTU_576	Chordata	Actinopteri	Gobiiformes	Gobiidae	Neogobius		96.988	Midori2	GCGGTTATACGAGAGGCCCAAGTTGACAAATCGGCGAAAAGCGCGTTAGTGATATCACCTCCACTAAAGCCAAACACCTTCAAGGCTGTAATACGCCCCCGAAGACAGGAAGCCCAACCACGAAAGTAGCTTTAATTTTCATGAAGCCACGAAAGCTAGGAAA	2	4	6	8	8	10	2	0	7	2	9	7	6	4	2	7	8	0	3	0	11	19	6	4	2	12	9	2	2	5	7	8	5	7	8	5	3	4	0	2
OTU_577	Chordata	Actinopteri	Perciformes	Gasterosteidae	Gasterosteus		96.97	Midori2	GCGGTGATACGAGAGGCCCAAGTTGATGAATCACGGCGTAAAGAGTGGTTAAGCTAAAATTAAAACTAAAGCCGAACACCCCCAAAGCTGTTATACGCATCCGGAGGTGAGAAGTTCAACCACGAAGGTGGCTTTATCTAACTTGAACCCACGAAATCTGCGGCA	40	38	32	20	82	29	6	27	6	14	36	5	59	16	20	21	6	44	15	14	0	24	24	33	8	10	30	13	20	23	21	8	11	13	74	52	113	75	18	0
OTU_578	Chordata	Actinopteri	Perciformes	Percidae	Perca		96.386	Midori2	GCGGTCATACGAGAGGCCCAAGTTGATAGACATCGGCGTAAAGCGTGGTTAAGACAAAAAACAAAACTAAAGCCGAACACCTTCAGAGCCGTTATACGCATCCGAAGGTAAGAAGTTCAACCACGAAAGTGGCTTTATAGCCCCTGAACCCACGAAAGCTACGATA	1	13	0	0	3	0	4	9	5	1	4	7	0	0	0	7	6	10	4	0	2	0	0	0	2	3	4	3	1	6	6	3	11	0	4	0	1	2	0	0
OTU_579	Chordata	Actinopteri	Perciformes	Percidae	Perca		96.988	Midori2	GCGGTTACACGAGAGGCCCAAGTTGATAGACATCGGCGTAAAGCGTGGTTAAGATTAAAGACAATACTAAAGCCGAACACCTTCAGCTGTTATACGCATCCGAAGGTAAGAAGTTCAACCACGAAAGTGGCTTTATAGCCCCTGAACCCACGAAAGCCACGGTA	9	13	3	8	2	2	1	4	0	1	0	4	6	5	2	6	10	3	4	2	4	2	1	8	5	3	6	0	1	6	1	1	3	3	2	2	5	1	0	0
OTU_580	No Match	No Match	No Match	No Match	No Match	No Match	No Match	Midori2	CATTCAGAAATTGGCTTATCCTCCCCGTCCACCTTTCCCCATGGTGCTATACCCATATCCTGAAAGGAATTTCGCTCCTCCGTAAGAACAACCCCTCCTGGTATGCCAAATATGTCGGTGTGTACAATCAAAATGTCGAATGGAACGATGCCACAATGTTTACGTCATTTCAACCGG	0	0	0	0	0	0	0	0	0	0	0	0	0	0	0	0	0	0	0	53	0	0	0	0	0	0	0	0	0	0	0	0	0	0	0	0	0	0	0	0
OTU_581	Chordata	Actinopteri	Perciformes	Percidae	Sander	Sander lucioperca	100	manual check	GCGGTCATACGATTAACCCAAACTAATTATTCTCGGCGTAAAGCGTGGTTAAGACAAAAACAAAACTAAAGCCGAACACCTTCAGAGCTGTTATACGCACCCGAAGGTAAGAAGTTCAACCACGAAAGTGGCTTTATTACCCCTGAACCCACGAAAGCTACGATA	0	0	2	0	0	0	0	0	0	0	0	0	0	0	0	0	1	0	0	0	0	0	0	0	0	0	0	0	0	0	0	0	0	0	0	0	0	0	0	0
OTU_582	Chordata	Actinopteri	Perciformes	Percidae			94.611	Midori2	GCGGTTAAACGAGAGGCCCTAGTTAATAATACACGGCGTAAAGCGTGGTTAAGATTAAAGACAATACTAAAGCCGAACACCTTCAGAGCTGTTATACGCACCCGAAGGTAAGAAGTTCAACCACGAAAGTGGCTTTATTACCCCTGAACCCACGAAAGCTACGATA	275	381	157	168	112	121	190	283	204	180	186	213	464	424	292	458	399	276	306	271	63	128	132	111	175	224	275	242	172	148	299	237	444	389	251	228	199	170	0	0
OTU_583	Chordata	Actinopteri	Cypriniformes	Cyprinidae			94.152	Midori2	GCGGTTAGACGAGAGGCCCTAGTTGATATTATAACGGCGTAAAAGGTTGGGATAAATAATAATAAAGCCAAATGGCCCCTTGGCCGTCATACGCTTCTAGGTGTCCGAGGCCCTATATACGAAAGTAGCTTTAATAACGCCCACCTGACCCCACGAAAGCTGAGAAA	0	0	0	0	0	0	0	0	1	0	0	0	0	0	0	0	0	0	0	0	0	0	1	0	0	0	0	0	0	0	0	0	0	0	0	0	0	1	0	0
OTU_584	Chordata	Actinopteri	Perciformes	Percidae	Perca	Perca fluviatilis	97.546	Midori2	GCGGTTATACGAGAGGCCCAAGTTGATAGACATCGGCGTAAAGCGTGGTTAAGATTAAAGACAATACTAAAGCCGAACACCTTCAGAGCTTACGCATCCGAAGGTAAGAAGTTCAACCACGAAAGTGGCTTTATAGCCCCTGAACCCACGAAAGCTACGGCA	1	4	0	0	0	0	0	0	0	0	0	0	1	6	2	0	2	3	0	0	0	1	1	0	0	0	0	0	3	0	0	0	2	0	1	1	0	5	0	0
OTU_585	Chordata	Actinopteri	Cypriniformes	Leuciscidae	Leuciscus		95.954	Midori2	GCGGTTAAACGAGAGGCCCCAGTTAATAATACACGGCGTAAAGGGTGGTTAAGGAAAGTATTAATAATAAAGCCAAATGGCCCTTCGGCTGTCATACGCTTCTAGGTGTCCGAAGCCCAATTATACGAAAGTAGCTTTAATAAAGTCCACCTGACCCCACGAAAGCTGAGAAA	0	0	3	0	1	0	0	15	1	0	1	1	2	1	4	1	0	1	20	0	0	0	1	0	0	1	1	1	0	0	0	2	2	2	0	0	1	2	0	0
OTU_586	Chordata	Actinopteri	Gobiiformes	Gobiidae	Neogobius		96.951	Midori2	GCGGTTATACGAGAGGCCCAAGTTGACAAAAATCCGCGAAAAGCGTGGTTAGTGATATCACCTCCACTAAAGCCAAACACCTTCAAGTCTGTAATACGCCCCCGAAGACAGGAAGCCCAATCACGAAAGTAGCTTTAATTTTCAAAGCCACGAAAGCTACGATA	0	0	0	0	0	0	0	0	0	0	0	0	0	0	0	0	0	0	0	0	0	0	0	0	0	0	0	0	0	0	0	0	1	0	0	0	0	0	0	0
OTU_587	No Match	No Match	No Match	No Match	No Match	No Match	No Match	Midori2	ATGGCGTGACGATCCTCTCTACCCGTGCCGGCTCCGATGATGTCCCATGGGGTCTCGACTACAGGAAAAACCATGAAACCCACAGCACCCGTTCCTCTGGAAATCCATTTTCGTCATTTGGCCAACTCCGAGGCCCTTGAAACCCACATACGCCACCAGGTCGA	4	0	1	0	0	0	0	0	0	0	0	11	0	0	0	0	0	0	0	22	0	0	0	8	3	0	0	0	0	0	0	0	0	0	0	0	0	0	0	0
OTU_588	No Match	No Match	No Match	No Match	No Match	No Match	No Match	Midori2	ATCACCTCGAGATCCAACTCCATCAATGGCTGCGGCTCCACTACGGCCACCGTCTGTTCCTCCGCCACCACCTCCGCCACCACCTCCGGAATCTGAGGATCCTTTGCCGACTTGTCCGGCAGCAGCTGAATTTGTGTAAGGAGTGTAGGTTTCGTACTCATTTCTTCCGTTATCGC	0	2	0	0	0	1	0	0	0	0	0	0	0	0	8	0	0	0	0	0	0	23	0	13	0	0	1	0	0	2	0	1	0	3	0	0	0	0	0	0
OTU_589	Chordata	Actinopteri	Gobiiformes	Gobiidae	Neogobius	Neogobius melanostomus	98.758	Midori2	GCGGTTATACGAGAGGCCCAAGTTGACAAAAATTGGCGAAAAGCGTGTTTAGTGATATCACCTCCACTAAAGCCAAACACCTTCAAGGCTGTAATACGCCCCCGAAGACAGGAAGCCCAATCACGAAAGTAGCTTTAATTTTCATGAAGCCACGAAAGCTAAAG	6	2	3	2	6	3	0	5	8	4	3	3	2	4	2	0	1	1	7	7	1	0	1	8	1	0	3	4	2	3	4	2	2	2	0	3	2	1	0	0
OTU_590	Chordata	Actinopteri	Perciformes	Percidae	Perca		95.181	Midori2	GCGGTTATACGAGAGGCCCAAGTTGACAAAAATCGGCGAAAAGCGTGGTTAAGATTAAAGATAATACTAAAGCCGAACACCTTCAGAGCTGTTATACGCATCCGAAGGTAAGAAGTTTAATTACGAAAGTGGCTTTATAGCCCCTGAACCCACGAAAGCTACGATA	1	2	2	1	0	0	2	3	3	2	1	4	6	5	2	9	14	1	1	1	0	1	6	2	1	0	2	5	3	0	1	1	7	1	4	5	4	3	0	0
OTU_591	Chordata	Actinopteri	Cypriniformes	Leuciscidae	Rutilus	Rutilus rutilus	97.661	Midori2	GCGGTTAAACGAGAGGCCCTAGTTGATAATACACGGCGTAAAGGGTGGTTAGGGGAAGCACAATAATAAAGCCAAATGGCCCTTTGGCTGTCATACGCCTCTAGGTGTCCGAAGCCCAATATACGAAAGTAGCTTTAATAAAGCCCACCCGACCCCACGAAAGCTGAGAAA	4	7	7	3	0	8	3	3	1	7	11	10	8	6	2	5	8	6	6	1	0	5	2	1	17	12	1	4	2	4	4	1	0	3	8	0	8	3	0	0
OTU_592	Chordata	Actinopteri	Gobiiformes	Gobiidae	Neogobius		96.988	Midori2	GCGGTTATACGAGAGGCCCAAGTTGACAAAAATCGGCGAAAAGCGTGGTTAGTGATATCCTCCACTAAAGCCAGACACCTTCAAGGCTGTAATACGCCCCCGAAGACAGGAAGCCAAATCACGAAAGTAGCTTCAATTTTCATGAAGCCACGAAAGCTAGGAAA	0	4	2	4	1	5	3	0	3	2	4	7	0	0	2	8	2	0	1	2	0	7	5	1	2	2	0	6	3	1	1	5	3	1	1	2	0	4	0	2
OTU_593	No Match	No Match	No Match	No Match	No Match	No Match	No Match	Midori2	GCTCAAACAGACCGCTGTAACCCACGCCCATGATGAGCAACGCACTCACGATGAAAGCCCCTGTCGCCTCGGGCAGGGTCACGCCCTGCGTCACGGCCAACACGGCCGCACCGGGCGTTGACCAAGCCGTCAACACGGGTTGCCGGTACCACAGGCTCAAGAC	0	0	0	0	2	0	0	0	0	6	0	5	0	0	0	0	0	0	0	0	0	0	0	0	0	2	27	0	0	0	3	0	1	0	0	0	0	0	0	0
OTU_594	No Match	No Match	No Match	No Match	No Match	No Match	No Match	Midori2	GCCAGAGCCGTGGAGCGCCCCGCCTCGGTCACACCCGGTGCGGGCTGGCGCACCTCACCATCGCTCAGCAAGTTGATCGAAGCCATGCCCCAATCGCCTAGGCTGCGCACTTCACCAGCATCGCTAACGCCGTCCTGGTCTGCGTCTTGCCAGACCTTGAACTCAG	0	0	0	0	0	0	0	0	0	0	0	0	0	0	0	0	0	0	0	0	0	39	0	0	0	0	0	0	0	0	0	0	0	0	0	0	0	0	0	0
OTU_595	Chordata	Actinopteri	Perciformes	Percidae			90	Midori2	GCGGTTATACGAGAGGCCCAAGTTGACAAAAATCGGCGAAAAGCGTGGTTAGTGATATCACCTCCACTAAAGCCGAACACCTTCAGAGCTGTTATACGCATCCGAAGGTAAGAAGTTCAACCACGAAAGTGGCTTTATAGCCCCTGACCCCACGAAAGCTGAGAAA	104	116	28	50	23	42	57	61	67	34	41	63	85	103	92	91	85	62	87	51	8	23	43	22	44	34	74	75	73	88	85	88	94	68	72	65	32	35	0	0
OTU_596	Chordata	Actinopteri	Cypriniformes	Leuciscidae	Rutilus		95.906	Midori2	GCGGTTAAACGAGAGGCCCTAGTTAATAATACACGGCGTAAAGGGTGGTTAAGGGAAGCACAATAATAAAGCCAAATGGCCCTTTGGCTGTCATACGCTTCTAGGTGTCCGAAGCCCCTAAACGAAAGTAGCTTTAGTACCGCCCACCTGACCCCACGAAAACTGAGAAA	0	0	0	2	0	0	0	0	0	3	0	28	0	17	0	0	0	0	0	0	0	0	0	0	8	9	0	0	0	0	0	0	24	6	0	0	0	0	0	0
OTU_597	Chordata	Actinopteri	Cypriniformes				95.266	Midori2	GCGGTTAAACGAGAGGCCCCAGTTAATAATACACGGCGTAAAGGGTGGTTAAGGATAAACAAAAATAAAGTCAAATGGCCCCTCGGCCGTCATACGCTTCTAGGAGTCCGAAGCCCTAATGAAAGTAACTTTAATAAACCCACCTGACCCCACGAAAGCTGAGAAA	1	0	1	5	2	1	3	2	1	1	0	1	4	3	1	4	0	1	5	2	0	0	0	0	3	0	1	1	1	0	3	2	0	0	0	3	1	0	0	0
OTU_598	Chordata	Actinopteri	Cypriniformes	Leuciscidae	Leuciscus	Leuciscus leuciscus/idus	98.182	manual check	GCGGTTAAACGAGAGGCCCTAGTTAATAATACACGGCGTAAAGGGTGGTTAAGGAAAGCATAACAATAAAGCCGAATGGCCCTTTGGCCATACGCTTCTAGGTGTCCGAAGCCCAATATACGAAAGTAGCTTTAATAAAGCCCACCTGACCCCACGAAAGCTACGATA	1	3	0	1	2	2	2	1	1	2	1	5	3	4	1	3	2	4	2	2	2	0	3	0	0	3	0	3	2	2	3	0	3	3	2	0	1	2	0	0
OTU_599	Chordata	Actinopteri	Perciformes	Percidae	Perca		96.988	Midori2	GCGGTTAAACGAGAGGCCCCAGTTGATAGACATCGGCGTAAAGCGTGGTTAAGATTAAAGACAATACTAAAGCCGAACACCTTCAGAGCTGTTATACGCATCCGAAGGTAAGAAGTTCAACCACAAAAGTGGCTTTATAGCCCCCAACCCACGAAAGCTACGATA	6	19	10	23	9	11	8	15	9	4	15	5	19	15	15	27	22	21	16	13	4	9	6	5	16	11	10	10	6	3	22	15	35	28	7	11	14	6	0	0
OTU_600	Chordata	Actinopteri	Gobiiformes	Gobiidae	Neogobius		96.386	Midori2	GCGGTTATACGAGAGGCCCAAGTTGATAGACATCGGCGAAAAGCGTGGTTAGTGATATCACCTCCACTAAAGCCAAACACCTTCAAGCTGTAATACGCCCCCGAAGACATGAAGCCCAATCACGAAAGTAGCTTTAATTTTCATGAAGCCACAAAAGCTAGGAAA	2	6	0	4	1	2	3	3	6	2	1	0	3	2	6	5	2	2	3	1	0	3	3	1	3	2	0	1	1	0	0	1	3	3	1	4	2	0	0	0
OTU_601	Chordata	Actinopteri	Cypriniformes	Leuciscidae	Squalius	Squalius cephalus	97.093	Midori2	GCGGTTAAACGAGAGGCCCTAGTTAATAATACACAGCGTAAAGGGTGGTTAAGGAAAACATAACAATAAAGCCTAATGGCCCTTTTGGCTGTCATACGCTTCTAGGTGTCCGAAGCCCAATATACGAAAGTAGCTTTAATAAAGTCCACCTGACCCCACGAAAGCTAGGAAA	213	289	155	126	124	451	162	116	139	298	350	353	135	384	95	154	276	274	128	118	86	0	70	166	74	99	229	217	263	150	216	195	302	209	212	237	252	167	0	0
OTU_602	No Match	No Match	No Match	No Match	No Match	No Match	No Match	Midori2	ACGGGCGCTCGATGGCGTACGCGGTCTTGACGACGTTGCCGGTCAGCAGGTTGGTGTACTTGAGATGCCCGGTAAACTGCGCGCTTCCGGGACCGGACGACGGTCGGATTAAGGTCACATACGGATGTTCTGGCTTAGCGCAGTGGATCTTGACGCCATCGAAGATCATGGAGACGA	0	0	0	0	25	0	0	0	0	0	0	0	0	0	0	0	0	0	0	0	0	0	0	0	0	5	0	0	0	0	0	0	0	0	0	0	0	0	0	0
OTU_603	Chordata	Actinopteri	Gobiiformes	Gobiidae	Neogobius		96.988	Midori2	GCGGTTATACGAGAGGCCCAAGTTGACAAAAATCGGCGAAAAGCGTGGTTAGTGATATCACCTCCACTAAAGCCAAACACCTTCAAGGCTGTAATACGCCCCCGACACAGGAAGCCCAATCACGAAAGTAGCTTTAATTTTCAAAGCCACGAAGGCTAGGAAA	0	0	0	0	0	2	1	0	1	0	2	1	0	1	0	1	0	1	1	0	0	1	0	0	0	0	1	0	0	0	0	0	2	1	0	1	0	0	0	0
OTU_604	Chordata	Actinopteri	Perciformes	Percidae	Perca		96.386	Midori2	GCGGTTATACGAGGGGCTCAAATTGATAGACATCGGCGTAAAGCGTGGTTAAGATTAAAGACAATACTAAAGCCGAACACCTTCAGAGCTGTTATACGCACCCGAAGGTAAGAAGTTCAACCACGAAAGTGGCTTTATTACCCCTGAACCCACGAAAGCTACGATA	4	6	2	1	2	0	4	3	0	5	1	0	1	0	5	2	13	3	6	1	0	0	1	1	2	1	5	0	2	0	5	3	2	1	2	3	1	4	0	0
OTU_605	No Match	No Match	No Match	No Match	No Match	No Match	No Match	Midori2	GGAGATTTCGCTGGGCATGAGGTCGCGCGCACCGCGCAGGCCCACAGCCTCGAGTTTCATCAACACGATGTCACGGATCAGGGCGGGCGTCAGGCTGGTGTGCTCGCGCAAGGGAAAGGCCACGTTGTCAAACACACTGAGGTCGGTGAACAAGGCGC	0	0	29	0	0	0	0	0	0	0	0	0	0	0	0	0	0	0	0	0	0	0	0	0	0	0	0	0	0	0	0	0	0	0	0	0	0	0	0	0
OTU_606	No Match	No Match	No Match	No Match	No Match	No Match	No Match	Midori2	GAAGGGCTGCTTGCCCGAGAACGATTTACCTTTCTGACCTTTGCCTTTGCCCTTCTCCGACCACGACACAGCACCGATGTCCATGGGGGCCGGTCCTCCCGGCGCCGATGCATTTGCACCCGATGTGAACGTCCGTTTCGCAAGAACCCAGTTCGTGACAATCGAATGCATCGTGT	0	0	0	29	0	0	0	0	0	0	0	0	0	0	0	0	0	0	0	0	0	0	0	0	0	0	0	0	0	0	0	0	0	0	0	0	0	0	0	0
OTU_607	Chordata	Mammalia					82.895	Midori2	GCGACCATATGATTAACCCGAGCTGACAGAACTCAGCGTAAAGAGTGTTTAATTAAGGTCTACCCTCAATAAAGCTAAACTCCAATTGAGTTGTAAAAAACTACAGCTGAAATAAAATATACTACGAAAGTGGCTTTAATACCCTGAAGACACAATAGCTAAAACC	0	0	0	0	0	0	0	0	0	0	0	0	0	0	0	0	0	0	0	0	0	0	0	0	0	40	0	0	0	0	0	0	0	0	0	0	0	0	0	0
OTU_608	Chordata	Actinopteri	Perciformes	Percidae	Perca	Perca fluviatilis	98.125	Midori2	GCGGTTATACGAGAGGCCCAATTTGATAGACATCGGCGTAAAGCCTGGTTAAGATTAAAGACAATACTAAAGCCGAACACCTTCAGAGCTGTTATACCCATCCGAAGGTAAGAAGTTCAACCACGAAAGTGGCTTTATAGCCCCTGAACCCACGAAAGCTGAGAAA	0	0	0	0	0	0	0	0	0	0	0	0	0	0	0	0	0	0	1	0	0	0	0	0	0	0	0	0	0	0	0	0	0	0	0	0	0	0	0	0
OTU_609	Chordata	Actinopteri	Cypriniformes	Leuciscidae	Rutilus	Rutilus rutilus	98.235	Midori2	TCGGTTAAACGAGAGGCCCTAGTTAATAATACACGGCGTAAAGGGTGGTTAAGGGAAGCACAATAATAAAGCCAAATGGCCCTTTGGCTGTCATACGCTTCCAGGCGTCCGAAGCCAAATATACGAAAGTAGCTTTAATAAAGCCCACCTGACCCCACGAAAGCTGAGAAA	6	25	16	18	0	2	4	47	8	11	4	4	42	8	4	7	9	29	43	0	0	12	2	3	5	50	50	13	3	29	23	3	8	6	2	0	19	33	0	0
OTU_610	No Match	No Match	No Match	No Match	No Match	No Match	No Match	Midori2	TTGCTGTCCTCGCTATATCCCACGTACTTGCCGTTCACCCAGAGAGTCAGGTTACTGGTGGCTGAACCTACATGGAAATAAACATCCTTGCCCTTCCAGTCTGCTGGAAGTTCGAAGGTGCGGCGATAAGAGCCGGTGTAGTTGTTGAGTTCGCTGATGTAAGGAGGATTTGGAT	0	0	0	0	0	0	0	0	0	0	0	0	0	0	0	0	0	0	0	0	31	0	0	0	0	0	0	0	0	0	0	0	0	0	0	0	0	0	0	0
OTU_611	No Match	No Match	No Match	No Match	No Match	No Match	No Match	Midori2	GCTCAAACAGGCCGCTGTAGCCCACGCCCATGATGAGCAACGCACTCACGATGAAGGCCCCCGTGGCTTCCGGCAGGGTCACGCCCTGAGTCACCGCCAACACCGCCGCACCGGGCGTTGACCAGGCCGTCAACACCGGTTGCCGGTACCAAAGGCTCAAGAC	0	0	0	0	0	0	29	0	0	0	0	0	0	0	0	0	0	0	0	0	0	0	0	0	0	0	0	0	0	0	0	0	0	0	0	0	0	0	0	0
OTU_612	Chordata	Actinopteri	Gobiiformes	Gobiidae	Neogobius		96.988	Midori2	GCGGTTATACTTGAGGCCCAAGTTGACAAAAATTGCGAAAAGCGTGGTTAGTGATATCACCTCCACTAAAGCCAAACACCTTCAAGGCTGTAATACGCCCCCGAAGACAGGAAGCCCAATCACGAAAGTAGCTTTAATTTTCATGAAGCCACGAAATCTAGGAAA	0	0	0	0	0	2	0	0	0	0	0	1	0	0	0	0	0	0	1	0	1	0	0	0	0	0	0	0	1	0	0	2	0	0	1	0	0	1	0	0
OTU_613	Chordata	Actinopteri	Cypriniformes	Leuciscidae	Rutilus	Rutilus rutilus	97.093	Midori2	GCGGTTAAACGAGAGGCCCCAGTTGATAACACCACGGCATAAAGGGTGGTTAAGGGAAGCACAATAATAAAGCCAAATGGCCCTTTGGCTGTCATACGCTTCTAGGTGTCCGAAGCCCAATATACGAAAGTAGCTTTAATAAAGCCCACCTGACCCCACGAAAGCTGAGAAA	1	0	9	9	0	1	1	10	3	1	0	2	8	2	0	1	0	2	0	2	0	0	5	0	1	3	1	2	0	1	1	44	2	2	1	8	3	1	0	0
OTU_614	Chordata	Actinopteri	Cypriniformes	Leuciscidae			93.567	Midori2	GCGGTTAAACGAGGGGCCCTAGTTAATAATACGCGGCGTAAAGGTGGTTAAGGAAAGCATAACAATAAAGTCAAATGGCCCCTTGGCCGTCATACGCTTCTAGGAGTCCGAAGCCCTAATACGAAAGTAACTTTAATAAACCCACCTGACCCCACGAAAGCTGAGAAA	0	3	21	13	3	48	7	4	7	0	11	27	20	2	0	6	20	10	4	12	3	0	6	0	0	0	12	2	1	8	7	10	19	0	6	4	9	7	0	0
OTU_615	Chordata	Actinopteri	Perciformes	Gasterosteidae			94.444	Midori2	GCGGTTATACGAGAGGCCCAAGTTGATAGACATCGGCGTAAAGCGTGGTTAAGCTAAAATTAAAACTAAAGCCGAACACCCCCAAAGCTGTTATACGCATCCGGAGGTGAGAAGTTCAACCACGAAGGTGGCTTTATCGCCCCTGAACCCACGAAAGCTACGATA	1	2	0	0	1	0	1	2	0	0	0	0	1	1	0	4	2	2	2	0	0	0	4	2	0	2	1	0	0	0	2	1	4	0	3	5	2	0	0	0
OTU_616	Chordata	Actinopteri	Cypriniformes				95.322	Midori2	GCGGTTAAACGAGAGGCCCCAGTTAATAATACACGGCGTAAAGGGTGGTTAAGGATAAACAAAAATAAAGTCAAATGGCCCCTTGGCCGTCATACGCTTCTAGGAGTCCGAAGCCCTAATACGAAATTCCAACTTTAATAAACCCACCTGACCCCACGAAAGCTGAGAAA	219	356	367	569	735	766	515	737	451	536	521	738	631	826	1026	710	862	676	962	691	91	0	121	128	316	358	640	494	480	331	1183	493	966	897	305	425	342	324	1	0
OTU_617	Chordata	Actinopteri	Cypriniformes	Leuciscidae	Leuciscus		96.491	Midori2	GCGGTTAAACGAGAGGCCCCAGTTAATAATACACGGCGTAAAGGGTGGTTAAGGAAAGCATTATAATAAAGCCAAATGGCCCCTTGGCCGTCATACGCTTCTAGGTGCCCGAAGCCCAATATACGAAAGTAGCTTTAATAAAGCCCACCTGACCCCACGAAAGCTGAGAAA	0	4	0	4	0	0	0	0	0	0	0	0	1	2	2	0	0	0	1	0	0	0	0	4	0	1	4	0	0	0	2	3	2	1	0	0	0	0	0	0
OTU_618	No Match	No Match	No Match	No Match	No Match	No Match	No Match	Midori2	AACGCATCACCCGAGCCCAGCCCGCTCACACCGTGTTGCTTTCGATAAACCCAATCAAGTGCGCTGAAGGCTGACCATCCGGCGGCGGCCGTCAAACCTCGCTCCAGGAACACGCCGTTCAGGTGAGCAAGTCCGAGACCCACGGCTAGGACAGCGAGGATCGGC	0	0	0	26	0	0	1	0	0	0	0	0	0	0	0	0	0	0	0	0	0	0	0	0	0	0	0	0	0	0	0	0	0	0	0	0	0	2	0	0
OTU_619	Chordata	Actinopteri	Perciformes	Percidae	Perca		96.386	Midori2	GCGGTTATACGAGAGGCCCAAGTTGATAGACATCGGCGTAAAGCGTGGTTAAGATTAAAGACAATACTAAAGCCAAACACCTTCAAGGCTGTAATACGCCCCCGAAGGTAAGAAGTTCAACCACGAAAGTGGCTTTATAGCCCCTGAACCCACGAAAGCTACGATA	3	3	1	3	0	0	0	1	0	0	2	0	0	1	0	1	2	0	0	0	0	0	1	0	0	0	3	0	0	0	0	0	1	1	3	0	0	0	0	0
OTU_620	Chordata	Actinopteri	Perciformes	Gasterosteidae			92.593	Midori2	GCGGTTATACGAGAGGCCCAAGTTGACAAAAATCGGCGAAAAGCGTGGTTAAGCTAAAATTAAAACTAAAGCCGAACACCCCCAAAGCTGTTATACGCATCCGGAGGTGAGAAGTTCAACCACGAAAGTGGCTTTATAGCCCCTGAACCCACGAAAGCTACGATA	0	1	0	0	0	0	0	0	0	0	0	0	1	0	1	0	0	0	0	2	0	0	0	0	0	0	0	1	0	0	3	0	0	1	0	0	0	0	0	0
OTU_621	Chordata	Actinopteri	Perciformes	Percidae	Sander	Sander lucioperca	98.148	manual check	GCGGTTATACGAGAGGCCCAAGTTGATAGACATCGGCGTAAAGTGTGGTTAAGACAAAAACAAAACTAAAGCCGAACACCTTCAGAGCTGTTATACGCACCCGAAGGTAAGAAGTTCAACCACGAAAGTGGCTTTATAGCCCCTGAACCCACGAAAGCTACGGCA	10	28	1	7	0	1	5	3	2	2	2	5	3	0	1	4	12	20	6	5	3	0	1	2	4	0	7	4	2	8	9	12	17	0	9	6	3	1	0	0
OTU_622	Chordata	Actinopteri	Cypriniformes				95.266	Midori2	GCGGTTAAACGAGAGGCCCCAGTTAATAATACACGGCGTAAAGGGTGGTTAAGGATAAACAAAAATAAAGTCAAAAGGCCTTGGCCGTCATACGCTTCTAGGAGTCCGAAGCCCTAATACGAAAGTAACTTTAATAAACCCACCTGACCCCACGAAAGCTGAGAAA	1	7	7	20	18	18	16	11	7	5	8	27	17	12	12	19	15	11	11	15	1	0	0	4	10	2	13	10	4	4	15	6	14	15	5	6	9	6	0	0
OTU_623	Chordata	Actinopteri	Gobiiformes	Gobiidae	Neogobius		96.988	Midori2	GCGGTTATACGAGAGGCCCAATTTGACAAAAGTCGGCGAAAAGCGTGGTTAGTGATATCACCTCCACTAAAGCCAAACACCTTCAAGGCTGTAATACGCCCCCGAATACAGGAAGCCCAATCACGAAAGTAGCTTTAATTTTCATGAAGCCAAAAGCTAGGAAA	1	0	0	0	0	1	0	0	0	0	0	0	0	0	0	0	0	0	0	0	0	0	0	0	0	0	0	0	0	1	0	0	1	0	0	0	0	0	0	0
OTU_624	Chordata	Actinopteri	Perciformes	Percidae	Perca	Perca fluviatilis	98.125	Midori2	GCGGTTATACGAGAGGCCCAAGTTGATAGACATCGGCGTAAAGCGTGGTTAAGATTAAAGACAATACTAAAGCCGAACACCTTCAGAGCTGTTATACGCATCCGAAGGTAAGAAGTTCAACCACGAAAGTGGCTTTACCCCCCTGAACCCACGAAAGCTGAGAAA	5	11	7	4	5	5	3	7	6	7	10	6	13	13	10	12	12	5	9	6	0	4	2	4	10	9	7	5	3	5	10	9	19	4	13	3	5	3	0	0
OTU_625	No Match	No Match	No Match	No Match	No Match	No Match	No Match	Midori2	GCACTACACCCAAGGCGAGATCGAGTGCATCGACGCTATCGAGGCCGCGCTCACGCCAGAGGAGTTCCGCGGCTACTGCAAGGGGAACGCGCTCAAGTACATCTGGCGCGAACGGCATAAGGGCGCCAAGGAATCACTGGCAAAAGCGGGCTGGTATCTTGCCCGGCTGCTCGG	0	0	0	0	27	0	0	0	0	0	0	0	0	0	0	0	0	0	0	0	0	0	0	0	0	0	0	0	0	0	0	0	0	0	0	0	0	0	0	0
OTU_626	No Match	No Match	No Match	No Match	No Match	No Match	No Match	Midori2	CAAGCATTGTTGTGAAAGTACCAATGATCAAAGACGGTGTGAAAGCATTAAAATGGTTTACCGACAACGGGATACGCACAAACTGTACACTGGTATTCTCTGCCGGCCAGGCGATACTGGCAGCCAAAGCTGGCGCGAGTTATGTTTCTCCATTCATTGGGCGTATCGATGATG	0	0	0	0	0	0	0	0	0	0	0	0	0	0	0	0	35	0	0	0	0	0	0	0	0	0	0	0	0	0	0	0	0	0	0	0	0	0	0	0
OTU_627	No Match	No Match	No Match	No Match	No Match	No Match	No Match	Midori2	ATGAACAAAAAACACCACCACCCTACTCAGAATTTTCAGGTGGGAGGGGTCCGGCcaaaaaaaccatccgttcaaaaaaaagtcaccccctcttaaaaaaaaTCTTGCCCAGGCCAGGATCATGTTCTGATACATCAACCTACACTCGCAGCTTGGCTTCAA	1	0	4	2	0	2	9	1	0	0	0	1	1	2	0	1	5	2	1	2	9	0	2	1	19	3	2	0	1	0	1	3	2	0	0	3	0	1	0	0
OTU_628	Chordata	Actinopteri	Gobiiformes	Gobiidae	Neogobius	Neogobius melanostomus	97.561	Midori2	GCGGTTATACGAGAGGCCCAAGTTGACAAAAATCGGCAAAAGCGTGGTTAGTGATATCACCTCCACTAAAGCCAAACACCTTCAAGGCTGTAATACGCCCCCGAAGACGAAGCCCAATCACGAAAGTAGCTTTAATTTTCATGAAGCCACGAAAGCTACGATA	0	1	1	0	1	0	0	0	1	0	0	0	0	0	0	0	0	0	3	1	0	0	0	0	0	0	1	0	0	0	0	0	0	0	0	0	0	0	0	0
OTU_629	Chordata	Actinopteri	Cypriniformes	Cyprinidae			93.605	Midori2	GCGGTTAGACGAGAGGCCCTAGTTGATATTATAACGGCTTAAAGGGGTTAGGGATAAATAATAATAAAGCCAAATGGCCCCTTGGCCGTCATACGCTTCTAGGTGTCCGAAGTTCAACATACGAAAGTAGCTTTAATAACGCCCACCTGACCCCACGAAAGCTGAGAAA	106	106	427	287	111	100	294	379	200	142	315	154	248	184	269	352	182	229	250	251	0	120	539	763	350	208	423	685	209	225	644	256	209	306	193	136	171	345	0	0
OTU_630	Chordata	Actinopteri	Gobiiformes	Gobiidae	Neogobius	Neogobius melanostomus	97.531	Midori2	GGTTATACGAGAGGCCCAAGTTGACAAAAATCGGCGAAAAGCGTGGTTAGTGATATCACCTCCACTAAAGCCAAACACTTTCAAGGCTGTAATACGCCCCCGAAGACAGGAAGCACAATCACGAAAGTAGCTTTAATTTTCATGAACCCACGAAAGCTACGATA	11	14	4	7	4	2	19	7	9	9	9	8	9	7	4	17	17	6	9	6	5	4	8	3	7	10	11	8	5	4	9	4	10	5	8	5	5	4	0	1
OTU_631	Chordata	Actinopteri	Gobiiformes	Gobiidae	Neogobius		96.988	Midori2	GCGGTTATACGAGAGGCCCAAGTTTACAAAAATCGGCGAAAAGCGTGGTTAGTGATATCACCTCCACTAAAGCCAAAGACCTTCAAGGCTGTAATACGCCCCCGAAGACAGGAAGCCCAATCGCGAAAGTAGCTTTAATTTTCATGAAGCCAAAAGCTAGGAAA	0	0	0	0	0	0	0	0	0	0	0	1	0	0	0	0	0	0	0	0	0	0	0	0	0	0	0	0	0	0	0	0	0	0	0	0	0	0	0	0
OTU_632	No Match	No Match	No Match	No Match	No Match	No Match	No Match	Midori2	AAGACGTGCAACTGCGGTAAAACGTCTCCACTCCCCACTATCCAAAGCTGCGCATCCGGGAGTTCCCGCATCGCCAAAACCGCCTCCTCAGCGCCGCGATCCACGTTGATTCCCGCTCCTTGGAGCAAAACCACCGGTGCGTCCGGCTTACCAAAACTCCACTCTTTGGC	0	0	0	0	24	0	0	0	0	0	0	0	0	0	0	0	0	1	0	1	0	0	1	0	6	0	0	0	0	0	0	0	0	0	0	0	0	0	0	0
OTU_633	No Match	No Match	No Match	No Match	No Match	No Match	No Match	Midori2	CCTTCCGTCAGCAAGGCCCAGCAGAAGGCGATCCAGAAGGCCGACACCCTCATCGAGGCGCTCGGCTGGATCCGCAAGTTCCGCGACACGACCACCGTCATCAAGCTCGGTGGCAGCGTTGTCGAACACCCCGACTCGCTCCGGCACCTGCTGCTCGACATCGTGTTCCTGTC	0	0	0	0	0	0	0	0	0	0	0	0	0	0	0	0	0	0	0	0	0	0	0	0	0	0	0	0	0	0	0	0	0	0	0	0	24	0	0	0
OTU_634	No Match	No Match	No Match	No Match	No Match	No Match	No Match	Midori2	CCGGACGAAGATTTTTTCCGAGCGCTTGAGATCGAACGCACGCGCGCGCTCGTAGAACGCGACGTAGCGACGATCAGGCGCATGCACGCGCCGGACTACGAGCTGATCAGTGTCCCGGGCCGGGTCATGAGCCTTGAGAGGTATCTCTCCCTCATGGCCCAGGATGTTTTCTACG	0	0	0	0	0	26	0	0	0	0	0	0	0	0	0	0	0	0	0	0	0	2	0	0	0	0	0	0	0	0	0	0	0	0	0	0	0	0	0	0
OTU_635	Chordata	Actinopteri	Cypriniformes				93.491	Midori2	GCGGTTAGACGAGAGGCCCTAGTTGATATTATAACGGCGTAAAGGGTGGTTAGGGATAAATAATAATAAAGCCAAATGGCCCCTTGGCCGTCATACGCTTCTAGGAGTCCGAAGCCCTAATACGAAAGTAATAAACCCACCTGACCCCACGAAAGCTGAGAAA	0	0	0	0	0	0	0	0	0	0	0	0	0	0	0	0	0	0	0	0	0	0	0	0	0	0	0	0	0	0	0	0	0	0	0	0	0	0	0	0
OTU_636	No Match	No Match	No Match	No Match	No Match	No Match	No Match	Midori2	CATTCAGAAATTGGCTTACCCTCCCCGTCCACCTTTCCCCATGGTGCTATACCCATATCCTGAAAGGACTTTCGCTCCTCCGTAAAAACAACCCCTCCTGGTATGCCAAATATGTCGGTGTGTACAATCACAATGTCGAATGGGATGATGCCGCAATGTTTACGTCATTCCAACCGG	0	0	0	0	0	0	10	3	0	1	0	1	0	1	0	2	0	0	0	15	1	0	0	3	0	0	1	3	0	0	0	1	0	1	0	5	0	0	0	0
OTU_637	Chordata	Actinopteri	Cypriniformes	Leuciscidae	Rutilus	Rutilus rutilus	97.661	Midori2	GCGGTTAAACGAGAGGCCCTAGTTAATAATACACGGCGTAAAGGGTGGTTAAGGGAAGCACAATAATAAAGCCAAATGGCCCTTTGGCTGTCATACGCTTCTAGGTATCCGAAGCCCAATATACGAAAGTAGCTTTAACAAAGTCCACCTGACGCCACGAAAGCTGAGAAA	3	5	0	4	2	4	1	2	0	4	4	4	13	34	3	2	5	35	5	6	0	4	2	1	5	5	1	1	1	2	4	0	4	3	3	1	8	5	0	0
OTU_638	Chordata	Actinopteri	Gobiiformes	Gobiidae	Neogobius		95.783	Midori2	GCGGTTATACGAGAGGCCCAAGTTGACAAAAATCGGCGAAAAGCGTGGTTAGTGATATCACCTCCACTAAAGCCATACCTTCAAGGCTGTAATACGCCCCCGAAGACAGGAAGCCCAATCACGAAAGTAGCTTTAATTACTATGAATCCACGAAAGCTAGGAAA	0	2	4	1	3	0	2	4	4	4	0	1	4	6	4	1	0	2	0	1	0	0	2	2	1	2	1	1	0	1	3	3	0	2	4	2	0	3	0	0
OTU_639	Chordata	Actinopteri	Cypriniformes	Leuciscidae			96.491	Midori2	GCGGTTAAACGAGAGGCCCCAGTTAATAATACACGGCGTAAAGGGTGGTTAGGGATAAATAATAATAAAGCCAAATGGCCCTTTGGCTGTCATACGCTTCTAGGTGTCCGAAGCCCAATATACGAAAGTAGCTTTAATAAAGCCCACCTGACCCCACGAAAGCTGAGAAA	6	4	8	3	7	1	1	2	5	9	4	6	8	5	2	6	2	11	5	9	2	0	3	2	7	2	6	1	0	2	7	5	8	17	1	2	3	1	0	0
OTU_640	Chordata	Actinopteri	Gobiiformes	Gobiidae	Neogobius	Neogobius melanostomus	98.16	Midori2	GCGTTATACGAGATGCCCAAGTTGACAAAAATCGGCGAAAAGCGTGGTTAGTGATATCACCTCCACTAAAGCCAAACACCCTCAAGGCTGTAATACGCCCCCGAAGACAGGAAGCCCAATCACGAAAGTAGCTTTAATTTTCATGAGGCCACGAAAGCTAGGAAA	9	13	11	10	19	17	14	4	14	19	22	17	16	7	9	20	12	18	5	11	15	29	7	13	17	20	22	11	18	14	7	13	16	9	22	10	13	15	0	8
OTU_641	Chordata	Actinopteri	Perciformes	Percidae	Perca		96.988	Midori2	GCGGTTATACGAGAGGCCCAAGTTGATAGACATCGGCGTAAAGCGTGGTTAAGATTAAAGACAATACTAAAGCCGAACACCTTCAGAGCTGTTATACGCATCCGGAGGTGAGAAGTTCAACCACGAAGGTGGCTTTATTACCCCTGAACCCACGAAAGCTACGATA	6	9	2	3	1	0	4	1	2	3	3	0	4	3	5	1	6	2	3	2	3	0	4	0	3	0	6	0	2	4	1	1	5	2	5	4	1	2	0	0
OTU_642	Chordata	Actinopteri	Gobiiformes	Gobiidae			94.512	Midori2	GCGGTTATACGAGAGGCCCAAGTTGACAAAAATCGGCGAAAAGCGTGGTTAGTGATATTACCTCCACTAAAGCCAAACACCTTCAAGGCTGTAATACGCCCCCGAAGACAGGAAGTCTAATCACGAAAGTAGCTTTTCATGAAGCCACGAAAGCTACGATA	0	0	0	0	0	0	0	0	0	0	0	0	0	0	0	0	0	0	0	0	0	0	0	0	0	0	0	0	0	0	0	0	0	0	0	0	0	0	0	0
OTU_643	Chordata	Actinopteri	Cypriniformes	Cyprinidae	Spinibarbus		95.882	Midori2	GCGGTTAGACGAGAGGCCCTAGTTGATATTATATGGCGTAAAGGGTGGTTAGGGAAATAATAATAAAGCCAAATGGCCCCTTGGCCGTCATACGCTTCTAGGTGTCCGAGGCCCTATATACGAAAGTAGCTTTAATAAAGCCCACCTGACCCCACGAAAGCTGAGAAA	0	2	5	4	2	0	2	0	1	3	6	1	3	3	0	7	1	4	0	3	0	2	1	6	1	3	2	2	0	0	1	2	2	1	0	1	1	0	0	0
OTU_644	Chordata	Actinopteri	Cypriniformes				96.471	Midori2	GCGGTTAGACGAGAGGCCCTAGTTGATATTACAACGGCGTAAAGGGTGGTTAAGGATAAACAAAAATAAAGTCAAATGGCCCCTTCCGTCATACGCTTCTAGGAGTCCGAAGCCTTAATACGAAAGTAGCTTTAATAACGCCCACCTGACCCCACGAAAGCTGAGAAA	0	0	0	0	2	0	1	0	0	0	0	1	0	1	4	0	0	1	0	0	0	0	0	0	1	1	0	0	1	0	0	0	1	1	0	0	1	1	0	0
OTU_645	Chordata	Actinopteri	Cypriniformes	Leuciscidae	Chondrostoma		96.512	Midori2	GCGGTTAGACGAGAGGCCCTAGTTGATATTACAACGGCGTAAAGGGTGGTTAAGGAAAGCATAACAATAAAGCCGAATGGCCCTTTGGCTGTCATACGCTTCTAGGTGTCCGAAGCCCGTTATACGAAAGTAGCTTTAACAACGCCCACCTGACCCCACGAAAGCTGAGAAA	0	2	5	4	1	0	2	5	0	8	3	12	4	7	2	2	2	153	0	3	0	69	0	0	4	1	3	0	5	0	29	2	44	0	2	4	0	1	0	0
OTU_646	Chordata	Actinopteri	Cypriniformes	Leuciscidae	Leuciscus		96.491	Midori2	GCGGTTAAACGAGAGGCCCTAGTTAACAATGCACGGCGTAAAGGGTGGTTAAGGAAAGCACAATAATAAAGCCAAATGGCCCTTTGGCTGTCATACGCTTCTAGGTGTCCGAAGCCCTAATACGAAAGTAACTTTAATAAACCCACCTGACCCCACGAAAGCTGAGAAA	19	19	54	15	32	0	0	11	33	13	54	23	30	96	8	20	2	40	14	7	0	0	0	0	16	0	26	0	21	22	31	43	107	58	6	12	18	12	0	0
OTU_647	Chordata	Actinopteri	Gobiiformes	Gobiidae	Neogobius		96.988	Midori2	GCGGTTATACGAGAGGCCCAAGTTGACAAAAATCGGCGAAAAGCGTGGTTAGTGATATCACCTCCACTAAAGCCAAACACCTTCAAGGCTGTAATACGCCCCCGAAGACAGGAAGCCCAATCACGAAAGTTTTTAATTTTCATGAAGCCACGAAAGCTGAGAAA	21	33	29	33	28	48	29	25	31	56	43	47	47	47	51	51	33	53	41	43	23	21	22	29	24	30	49	45	15	18	57	24	60	58	16	30	21	38	0	4
OTU_648	Chordata	Actinopteri	Gobiiformes	Gobiidae	Neogobius	Neogobius melanostomus	98.802	Midori2	GCGGTTATACGAGAGGCCCAAGTTGACAAAATCGGCGAAAAAGCGTGGTTAGTGATATCACCTCCACTAAAGCCAAACACCTTCAAGGCTGTAATACGCCCCCGAAGACAGGAAGCCCAATCACGAAAGTAGCTTTAATTTTCATGAAGCCACGAAAGCTAGGAAA	4	13	10	5	29	27	26	4	47	15	13	16	7	18	14	17	30	123	10	8	20	30	17	20	31	38	37	10	8	16	18	8	25	18	10	12	7	17	0	15
OTU_649	Chordata	Actinopteri	Gobiiformes	Gobiidae	Neogobius		96.951	Midori2	GCGGTTATACGAGGGGCTCAAGTTGACAAAGATCGGCGTAAAGCGTGGTTAATGATAGTTCCACTAAAGCCAAAACACCTTCAAGGCTGTTATACGCCCCCGAAGACAGGAAGACCCATCACGAAAGTAGCTTTAATCTTCATGAACCCACGAAAGCTAGGAAA	0	2	0	0	0	0	0	0	0	0	0	0	0	0	0	0	0	0	0	0	0	0	0	0	0	0	0	0	0	0	0	0	0	0	0	0	0	0	0	0
OTU_650	Chordata	Actinopteri	Gobiiformes	Gobiidae	Neogobius		96.386	Midori2	GCGGTTATACAGGCCCAAGTTGACAAAAATCGGCGAAAAGCGTGGTTAGTGATATCACCTCCACTAAAGCCAAACACCTTCAAGGCCGTAATACGCCCCCGAAGACAAAGCCCAATCACGAAAGTAGCTTTAATTTTCATGAAGCCACGAAAGCTAGGAAA	0	0	0	0	0	0	0	0	0	0	0	0	0	0	0	0	0	0	0	0	0	0	0	0	0	0	0	0	0	0	0	0	0	0	0	0	0	0	0	0
OTU_651	Chordata	Actinopteri	Cypriniformes	Leuciscidae	Squalius	Squalius cephalus	97.076	Midori2	GCGGTTAAACGAGAGGCCCTAGTTAATAATACACGGCGTAAAGGGTGGCTAAGGAAAACATAACAATAAAGCCGAATGGCCCTTTGGCTGTCATACGCTTCTAGGTGTCCGAAGCCCAATATATAAAAGTAGCTTTAATAAAGTCCACCTGGCCCCACGAAAGCTGAGAAA	5	9	8	8	13	23	9	5	5	25	21	15	7	17	0	11	8	8	11	15	7	0	5	12	5	16	13	41	8	17	26	2	24	21	14	7	18	9	0	0
OTU_652	Chordata	Actinopteri	Perciformes	Percidae	Perca	Perca fluviatilis	97.561	Midori2	GCGGTTATACGAGAGGCCCAAGTTTTAGACATCGGCGTAAAGCGTGGTTAAGATTAAAGACAATACTAAAGCCGAACACCTTCAGAGCTGTTATACGCATCCGAAGGTAAGAAGTTCAACCACGAAAGTGGCTTTATAGCCCCTGAAGCCACGAAAGCTAGGAAA	153	188	69	112	70	114	107	76	86	86	99	160	86	107	130	176	129	111	130	65	14	53	75	70	90	91	138	123	85	109	92	124	155	132	100	135	70	93	0	0
OTU_653	Chordata	Actinopteri	Cypriniformes	Leuciscidae	Rutilus	Rutilus rutilus	97.661	Midori2	GCGGTTAAACGAGAGACCCTAGTTAATAATACACGGCGTAAAGGGCGGCTAAGGGAAGCACAATAATAAAGCCAAATGGCCCTTTGGCTGTCATACGCTTCTAGGTGTCCGAAGCCCAATATACGAAAGTAGCTTTAATGAAGCCCACCTGACCCCACGAAAGCTGAGAAA	2	7	5	2	1	5	1	6	6	11	1	7	7	42	2	1	2	20	4	2	0	9	12	1	7	7	0	3	2	4	4	3	6	4	0	3	7	4	0	0
OTU_654	No Match	No Match	No Match	No Match	No Match	No Match	No Match	Midori2	ATTGCCGTCAACGCGGCGCGTTTGGTGCAAAATTGCTGGATCAGCCTTTGATGCAAAACGTGCTAGCAGACCTGCAACTGGAATATGAGGGCGGCATCGCCTTCGCCATGCGCATGGCCTACGCCTTGGACCACAAAGACAGCAATGAGCACGAAGC	0	0	0	0	0	0	0	0	0	0	0	0	0	0	0	0	0	0	0	0	0	0	0	0	0	0	0	0	0	0	0	0	0	0	0	0	0	27	0	0
OTU_655	Chordata	Amphibia	Anura	Bufonidae	Bufo	Bufo bufo	100	Midori2	GCGGTTACACCACGTGGCTCAAATTGACCCCCTCCGGCGTAAAGCGTGATTAAAGTCATTCCTAACTAGAGTTAAACTAAAATTGAGCTGTGACACGCCTGTTTACTAAGAAACCCAAAAACGAAAGTTACTCTATTATAATCAACTTGAACTCACGACAGCTGGGGAA	0	0	0	0	0	0	0	0	0	0	0	0	0	0	0	0	0	0	0	0	0	24	0	0	0	0	0	0	0	0	0	0	0	0	0	0	0	0	0	0
OTU_656	Chordata	Aves	Passeriformes	Fringillidae			98.315	Midori2	GCGGTCATACAGGAGACCCAAATTAACATTATAACGGCGTAAAGAGTGGTCACATGCTATCCAAGTAACTAAGATTAAAAGCAACTGAGCTGTCACAAGCCCAAGATGCTGATAAGGCCTCCTCATCAAAGAAGATCTTAGGACAACGATTGATTGAACTCCACGAAAGCCAGGGCC	0	24	0	0	0	0	0	0	0	0	0	0	0	0	0	0	0	0	0	0	0	0	0	0	66	0	0	86	16	0	0	0	0	0	0	0	0	0	0	0
OTU_657	Chordata	Actinopteri	Cypriniformes	Cyprinidae			90	Midori2	GCGGTTAGACGAGAGGCCCTAGTTGATATTACAACGGCGTAAAGGGTGGTTAAGGATAAACAAAAATAAAGTCAAATGGCCCCTTGGCCGTCATACGCTTCTAGGTGTCCGAAGTTCAACATACGAAAGTAGCTTTAATTTTCATGAAGCCACGAAAGCTAGGAAA	0	0	0	1	0	1	0	1	0	0	1	1	5	2	0	5	2	1	0	0	0	0	0	0	0	1	1	2	1	0	2	0	0	0	0	0	0	0	0	0
OTU_658	Chordata	Mammalia	Rodentia	Cricetidae	Microtus	Microtus arvalis	98.113	Midori2	GCGGTCATACGATTAACCCAAACTAATTATTCTCGGCGTAAAACGTGTTACTAGAGTATGCAAAATAGAATTAAAATCCATCCAATATGTGAAAATTCATCGCTGGACCTAAAACCAATGACGAAAGTAATTCTAATAAGCCTGATACACGAAAGCTACGATA	0	0	0	0	3	0	0	15	14	16	18	0	0	0	0	2	3	3	14	0	0	0	0	0	0	0	0	0	0	0	2	0	0	0	0	1	0	0	0	0
OTU_659	No Match	No Match	No Match	No Match	No Match	No Match	No Match	Midori2	CATTCGTTCTCAACCCAAGCTTAGGAGCCAGGAACCTAGGTGCAGACAGTTCTACTAAAGAGGTCGTTACATCGCCACCTAGGTTGGTGACGCAAAAGAGTAAACGCTGCTCTGAGCGGGCGAGAATCAGTCGGCTCCCTGACGACTTGTTGCATTGCTTAACC	0	0	0	0	0	0	0	0	20	0	0	0	0	0	0	0	0	1	0	0	0	0	1	0	0	0	0	1	0	0	0	0	0	2	0	0	0	0	0	0
OTU_660	No Match	No Match	No Match	No Match	No Match	No Match	No Match	Midori2	TTGCGATGCATACGATAACTTTCCAGGGTTGGCTTTTGCAGCCGCAAGAAATTCTGGAAAGGTTTTGTAAGGACTATTCGCCGATACCACCACTACATTTGGAGAGACGCCAACCAAAATCACTGGAGCAAAATCTTTGTCTTGTGAATAGGGCAGCTTTGCTTT	0	0	0	0	0	0	0	0	0	0	0	22	0	0	0	0	0	0	0	0	0	0	0	0	0	0	0	0	0	0	0	0	0	0	0	0	0	0	0	0
OTU_661	No Match	No Match	No Match	No Match	No Match	No Match	No Match	Midori2	ATACCGCCTGATCAAGGCCTTATCTATGATGGCAACCAGTTCTCCCCAGTGGTTGTCATCATATGTCAACACACAGTCCATGTACGTAAACAACTTTGCAAACATCTCCTCAACCACACACCACAGATCCTACAGCACAGTCACAACATGCAGGGTTAGCCAATGGGCATC	0	0	0	20	0	0	0	0	0	0	0	0	0	0	0	0	0	0	0	0	0	0	0	0	0	0	0	0	0	0	0	0	0	0	0	0	0	0	0	0
OTU_662	Chordata	Mammalia	Rodentia	Cricetidae	Microtus		96.951	Midori2	GCGGTCATACGATTAACCCAAACTAACTATTCTCGGCGTAAAACGTGTTACTATACATATAAAAAATAGAATTAAAATCCATCCAATATGTGAAAATTCATCGCTGGACCTAAAACCAATGACGAAAGTAATTCTAATAAGCCTGATACACGATAGCTAAGGTA	0	0	0	0	3	0	0	0	0	0	0	0	0	0	0	0	0	0	0	0	0	0	0	0	0	0	0	0	0	0	0	0	0	0	0	0	0	0	0	0
OTU_663	Chordata	Mammalia	Artiodactyla	Bovidae			96.951	Midori2	GCGGTCGTACGATTAACCCAAGCTAACAGGAGTACGGCGTAAAGCGTGTTAAAGCACCATACCAAATAGGGTTAAATTCTAACTAAGCTGTAAAAAGCCATGATTAAAATAAAAATAAATGACGAAAGTGACCCTACAATAGCCGCACTATAGCTAAGACC	0	0	1	0	1	1	0	0	1	1	0	0	1	0	0	3	0	0	0	0	2	4	0	0	0	1	0	0	1	0	0	0	0	0	0	0	0	0	0	0
OTU_664	Chordata	Actinopteri	Gobiiformes	Gobiidae	Neogobius		95.181	Midori2	GCGGTTATACGAGAGGCCCAAGTTGATAGACATCGGCGTAAAGCGTGGTTAGTGATATCACCTCCACTAAAGCCAAACACCTTCAAGGCTGTAATACGCCCCCGAAGACAGGAAGACCCATCACGAAAGTAGCTTTAATCTTCATGAACCCACGAAAGCTAGGAAA	6	9	3	4	7	6	4	2	3	4	3	4	1	7	14	5	5	3	7	3	0	2	3	1	1	1	5	10	2	0	1	1	4	9	4	6	4	1	0	0
OTU_665	Chordata	Actinopteri	Cypriniformes	Leuciscidae			94.186	Midori2	GCGGTTATACGAGAGGCCCAAGTTAATAATACACGGCGTAAAGGGTGGTTAAGGAAAGTATTAACAATAAAGCCAAATGGCCCCTTGGCCGTCATACGCTTCTAGGAGTCCGAAGCCCTAATACGAAAGTAGCTTTAATAAAGCCCACCTGACCCCACGAAAGCTGAGAAA	2	2	8	3	3	2	3	2	1	2	0	4	4	7	6	3	1	7	3	5	0	0	0	1	0	3	3	0	1	2	4	3	7	8	0	5	2	3	0	0
OTU_666	Chordata	Actinopteri	Gobiiformes	Gobiidae	Neogobius		96.988	Midori2	GCGGTTATACGAGAGGCCCAAGTTGACAAAAATCGGCGAAAAGCGTGGTTAGTGATAATTCCACTAAAGCCAAACACCTTCAAGGCTGTAATACGCCCCCGAAGACAGGAAGCCCAATCACGAAAGTAGCTTTAATTTTCATGAAGCCACGAAAGCTAGGAAA	1	5	1	2	12	8	3	6	3	5	3	4	0	3	1	5	5	4	0	5	1	0	1	26	7	4	3	6	1	2	14	3	1	15	2	3	4	8	0	1
OTU_667	Chordata	Actinopteri	Cypriniformes	Leuciscidae	Leuciscus		96.491	Midori2	GCGGTTAAACGAGAGGCCCCAGTTAATAATACACGGCGTAAAGGGTGGTTAAGGAAAGTTAACAATAAAGCCGAATGGCCCTTTGGCTGTCATACGCTTCTAGGTGTCCGAAGCCCATACGAAAGTAGCTTTAATAAAGCCCACCTGACCCCACGAAAGCTGAGAAA	0	1	0	0	1	1	0	1	0	1	0	0	0	2	2	0	2	0	0	0	0	0	0	0	0	2	2	1	1	0	1	3	7	7	1	1	3	0	0	1
OTU_668	Chordata	Actinopteri	Cypriniformes				95.266	Midori2	GCGGTTAAACGAGAGGCCCTAGTTAATAATACACGGCGTAAAGGGTGGTTAAGGATAAACAAAAATAAAGTCAAATGGCCCCTTGGCCGTCATACGCTTCTAGGAGTCCGAAGCCCTAATACGAAAGTAGCTTTAATTAACCCGCCTGACCCCACGAAAACTGAGAAA	2	0	1	3	0	6	5	9	1	3	4	0	7	11	2	7	8	5	1	4	1	0	4	2	0	0	4	2	0	1	2	4	2	2	0	1	1	0	0	0
OTU_669	Chordata	Actinopteri	Perciformes	Percidae	Perca	Perca fluviatilis	98.758	Midori2	GCGGTTATGCGAGAGGCCCAAGTTGATAGACATCGGCGTAAAGCGTGGTTAAGATTAAAGACAATACTAAAGCCGAACACCTTCAGAGCTGCTATACGCATCCGAAGGTAAGAAGTTCAACCACGAAAGTGGCTTTATAGCCCCTGAACCCACGAAAGCTAGGGAA	23	9	11	4	5	2	3	2	1	7	2	7	12	17	8	9	10	5	3	0	5	4	6	0	8	5	5	7	2	6	9	1	11	19	10	4	6	8	0	0
OTU_670	Chordata	Actinopteri	Cypriniformes	Leuciscidae			94.253	Midori2	GCGGTTAAACGAGAGGCCCCAGTTAATAATACACGGCGTAAAGCGTGGTTAAGATTAAAGACAATACTAAAGCCGAATGGCCCTTTGGCTGTCATACGCTTCTAGGTGTCCGAAGTTCAACATACGAAAGTAGCTTTAATAACGCCCACCTGACCCCACGAAAGCTGAGAAA	1	0	0	0	0	0	0	0	0	0	0	1	0	0	0	0	0	0	0	0	0	0	0	0	0	0	0	0	0	0	0	0	0	2	0	0	0	0	0	0
OTU_671	Chordata	Actinopteri	Gobiiformes	Gobiidae	Neogobius		96.988	Midori2	GCGGTTATACGAGAGGCCCAAGTTGACAAAAATCGGCGAAAAGCGTGGTTAGTGATATCACCTCCACTAAAGCCAAACACCTTCAAGGCTGTAATACGCCCCCGAAGACAGGAAGCCCAATCACGAAAGTAGCTTTAACTATGAATCCACGAAAGCTAGGAAA	5	5	5	17	8	14	9	8	9	10	6	9	6	6	5	5	6	13	8	7	4	6	13	7	13	8	8	4	6	3	11	6	10	6	4	6	12	7	0	0
OTU_672	Chordata	Mammalia	Rodentia	Cricetidae	Microtus		96.951	Midori2	GCGGTCAGACGATTAACCCAAACTAATTATTCTGGGCGTAAAACGTGTTACTAGAAATATGCAAAATAGAATTAAAATCCATCCAATATGTGAAAATTCATCGCTGGACCTAAAACCAATGACGAAAGTAATTCTAATAAGCCCGATACACGATAGCGAACGTA	0	0	0	0	0	0	0	0	0	0	0	0	0	0	0	0	0	0	0	0	0	0	0	0	0	0	0	0	0	0	0	0	0	0	0	0	0	0	0	0
OTU_673	No Match	No Match	No Match	No Match	No Match	No Match	No Match	Midori2	GCTCAAACAGACCGCTGTAACCCACCCCCATGATGAGCAACGCACTCACAATGAAGGCCCCCGTGGCTTCCGGCAGGGTCACGCCCTGCGTCACCGCCAACACCGCCGCACCGGGCGTTGACCAGGCCGTCAACACCGGTTGCCGGTACCAAAGGCTCAAGAC	0	0	0	1	0	0	0	1	0	0	2	0	0	2	8	0	2	0	8	0	0	0	0	4	0	1	0	0	0	0	0	0	0	0	0	3	0	0	0	0
OTU_674	No Match	No Match	No Match	No Match	No Match	No Match	No Match	Midori2	CGGCGCTGTTCATCAAGATAGAGGTACGACGAAGGATTAGCGATAACATAACGCATATGAATGCCCATCGGCCGCGCCACTTGATCCTCAACTTGACTGCCCACAGCAAAACGTTGCGTAAGTTGGCCCCCCGCTGAATGCCCGCTAATAACTATCGTCTT	0	0	0	0	25	0	0	0	0	0	0	0	0	0	0	0	0	0	0	0	0	0	0	0	0	0	0	0	0	0	0	0	0	0	0	0	0	0	0	0
OTU_675	Chordata	Actinopteri	Gobiiformes	Gobiidae	Neogobius		96.988	Midori2	GCGGTTATACGAGGCCCAAGTTGACAAAAATCGGCAAAAGCGTGGTTAGTGATATCACCTCCACTAAAGCCAAACACCTTCAAGCCTGTAATACGCCCCCGAAGACAGGAAGCCCAATCACGAAAGTAGCTTTAATTTTCATGAAGCCACGGAAGCTAGGAAA	0	1	0	0	0	0	0	0	0	0	0	0	1	0	0	0	0	0	0	0	1	0	0	0	0	0	0	0	0	1	0	1	0	0	1	0	0	0	0	0
OTU_676	Chordata	Actinopteri	Cypriniformes	Leuciscidae	Abramis		96.512	Midori2	GCGGTTAAACGAGAGGCCCCTAAATAATACACGGCGTAAAGGGTGGTTAAGGAAAGCATAACAATAAAGCCGAATGGCCTTTTGGCTGTCATACGCTTCTAGGTGTCCGAAGTTCAACATACGAAAGTAGCTTTAATAACGCCCACCTGACCCCACGAAAGCTGAGAAA	0	0	0	0	6	0	0	1	2	3	1	1	0	1	0	0	2	1	11	0	1	0	0	0	0	1	0	1	0	0	0	1	1	2	0	0	3	2	0	0
OTU_677	Chordata	Actinopteri	Cypriniformes	Leuciscidae			94.186	Midori2	GCGGTTAGACGAGAGGCCCTAGTTGATATTACAACGGCGTAAAGGGTGGTTAAGGGGACACAATAATAAAGCCAAATGGCCCTTTGGCTGTCATACGCTTCTAGGTGTCCGAAGTTCAACATACGAAAGTAGCTTTAATAACGCCCACCTGACCCCACGAAAGCTGAGAAA	6	1	2	3	4	4	5	6	1	5	3	8	2	5	4	7	13	16	10	4	0	0	1	6	5	3	1	1	0	2	4	2	5	7	3	6	5	1	0	0
OTU_678	Chordata	Actinopteri	Gobiiformes	Gobiidae	Neogobius		96.988	Midori2	GCGGTTATACGAGAGGCCCAAGTTGACAAAAATCGGCGAAAATCGTGGTTAGTGATATCACCTCCACTAAAGCCAAACACCTTCAAGGCTGTAATACTCCCCCGAAGACAGGAAGCCCAATCACGAAAGTAGTTTTAATTTTCATGAAGCCACGAACCTAGGAAA	1	0	2	3	0	0	4	0	2	1	0	1	0	1	0	1	0	0	0	3	1	1	2	1	1	1	0	0	1	0	0	1	2	0	2	1	0	1	0	0
OTU_679	Chordata	Actinopteri	Cypriniformes	Leuciscidae	Leuciscus		96.512	Midori2	GCGGTTAAACGAGAGGCCCCAGTTAATAGTACACGGCGTAAGGGGTGGTTAAGGAAAGTATTAACAATAAAGCCGAATGGCCCTTTGGCTGTCATACGCTTCTAGGAGTCCGAAGCCCAATATACGAAAGTAGCTTTAATAAAGCCCACCTGACCCCACGAAAGCTGAGAAA	2	4	5	2	6	2	8	1	1	3	3	6	11	13	7	11	5	4	7	4	0	6	0	3	3	0	5	2	4	2	6	3	9	5	0	3	1	4	0	0
OTU_680	Chordata	Actinopteri	Gobiiformes	Gobiidae	Neogobius	Neogobius melanostomus	97.59	Midori2	GCGGTATACGAGGGGCTCAAGTTGACAAAAATCGGCGAAAAGCGTGGTTAGTGATATCACCCCCACTAAAGCCAAACACCTTCAAGGCTGTAATACGCCCCCGAAGACAGGAAGCCCAATCACGAAAGTAGCTTTAATTTTCATGAAGCCACGAAAGCTAGGAAA	6	7	4	9	13	9	19	7	18	7	14	10	17	5	12	10	14	22	10	6	7	18	8	20	6	18	18	9	4	9	15	12	13	11	11	11	7	20	0	65
OTU_681	Chordata	Actinopteri	Perciformes	Percidae	Perca		96.988	Midori2	GCGGTTATACGAGAGGCCCGAGTTGATAGGCATCGGCGTAAAGCGTGGTTAAGATTAAAGACAATACTAAAGCCGAACACCTTCAGCTGTTATACGCATCCGAAGGTAAGAAGTTCAACCACGAAAGTGGCTTTATAGCCCCTGAACCCACGGAAGCTACGATA	14	9	1	7	5	2	2	0	2	2	9	3	6	4	4	5	5	4	6	3	0	3	7	4	6	4	1	1	6	6	2	5	9	6	4	0	2	0	0	0
OTU_682	No Match	No Match	No Match	No Match	No Match	No Match	No Match	Midori2	GAGACTCAAGGTCGAATCCACACATCCGCTGCCGGCGTGCTTTGCTTCCCAGAAGTAGATGAGCCAGAAGAAGTTGAGATCAGTCAGAACGATTTGCGCATCGACGTTTATCGTTCATCGGGTCCTGGTGGTCAGTCGGTGAACACCACCGACTCGGCAGTGCGAATCACTCACCTT	0	0	0	0	0	0	0	0	0	0	0	0	0	0	3	3	0	0	0	0	0	0	0	0	0	1	1	0	0	20	0	0	0	0	0	0	0	0	0	0
OTU_683	No Match	No Match	No Match	No Match	No Match	No Match	No Match	Midori2	TGCCTTGCAACTTGCTCCAGCACCCAGTCCCTGAACACCGCCAGTGCCATTGTGCTAAAAAAACTACACAAACTGATAAAACCAAAATACTCCCTTTTCCTGCCAAACCTTCTCAAAAATAGACTCACCTTTGGTGCAAGGTCTATTATGTAGAGCCGGCTGTCTC	0	0	0	0	0	0	0	0	0	0	0	0	0	0	0	0	0	0	0	0	21	0	0	0	0	0	0	0	0	0	0	0	0	0	0	0	0	0	0	0
OTU_684	No Match	No Match	No Match	No Match	No Match	No Match	No Match	Midori2	ACAACATAACACAACATTTTTTTCATCCCACACAGCTTCTATTAAAAAGATCCGCGAAGATGTGTGCTACAAAAGGATACCAGCCGCATCGCACACCAATGCACGGCTGGCCCGCACGGCACCCGTTTACAAAAACATCGCCCTACCCCGTTTTCCCACG	2	0	0	1	0	0	0	0	0	0	0	0	0	0	0	0	0	0	23	0	0	0	0	0	0	0	0	0	0	0	0	0	0	0	0	0	0	0	0	0
OTU_685	No Match	No Match	No Match	No Match	No Match	No Match	No Match	Midori2	TTGGCACTGGTTGGCCCTTCTTTTGCCTAGTTGAGCCTGTCCATGCCCAGTCTAGTCTGGCCCAGCATGTGGCCGCTGCGGCTGTCCACATCGCTCGACCCGACTGTAGTGCACCGACTCTTCAGAGGTCGGCGCCGCATGCTCCTGCCCAACCAAGCACC	0	0	1	11	1	2	4	0	2	0	0	2	2	2	0	5	0	2	2	2	0	0	0	0	0	0	0	4	0	2	0	1	0	0	2	0	0	1	0	0
OTU_686	No Match	No Match	No Match	No Match	No Match	No Match	No Match	Midori2	AACAGCACTCCAATTCCAGTAAGTTCCGCTGAAAAACCGCATGAATCCGATGTACCCAGTCGTCCGGTACTTCCTCCAGAGCCACCTCAGTATTACCAAGACTCTTATCGGCAGCGTCCTTCGTACAACATGGACATTGCCCAAATGATGGAGCAGATCCGTTTCAGTAT	0	0	0	0	0	0	0	5	0	0	0	0	0	0	0	0	0	0	0	0	0	0	16	0	0	0	0	0	0	0	0	0	0	0	0	0	6	0	0	0
OTU_687	Chordata	Actinopteri	Cypriniformes	Leuciscidae	Leuciscus		97.076	Midori2	GCGGTTAAACGAGAGGCCCTAGTTAATAATACACGGCGTAAAGGGTGGTTAAGGAGAGCATAACAATAAAGTCAAATGGCCCCTTGGCCGTCATACGCTTCTAGGAGTCCGAAGCCCAATATACGAAAGTAGCTTTAATAAAGCCCACCTGACCCCACGAAAGCTGAGAAA	0	3	1	2	1	2	2	3	3	2	2	6	50	26	359	38	1	3	16	14	0	3	0	0	0	2	0	3	3	0	0	4	2	3	0	2	1	0	0	0
OTU_688	Chordata	Actinopteri	Cypriniformes	Leuciscidae	Rutilus		96.491	Midori2	GCGGTTAAACGAGAGGCCCTAGTTAATAATACACGGCGTAAAGGGTGGTTAAGGGAAGCACAATAATAAAGCCAAATGGCCCTTTGGCTGTCATACGCTCCTAGGTGTCCGAAGCCCAATATACGAAAGTAGCTTTAAACCCCTCCTGACCCCACGAAAGCTGAGAAA	124	198	7331	5781	27	76	108	12929	113	279	116	155	11632	101	75	123	953	3277	9844	132	0	152	51	34	116	15736	4972	5177	43	9741	8238	47	81	147	31	51	5789	6531	0	0
OTU_689	Chordata	Actinopteri	Cypriniformes				92.486	Midori2	GCGGTTATACGAGAGGCCCAAGTTGATAGACATCGGCGTAAAGCGTGGTTAAGGAAAGTATTAACAATAAAGCCGAATGGCCCTTTGGCTGTCATACGCTTCTAGGTGTCCGAAGCCCTAATACGAAAGTAACTTTAATAAACCCACCTGACCCCACGAAAGCTGAGAAA	3	3	2	1	1	0	6	0	0	0	0	1	3	0	1	4	1	0	4	0	0	1	1	0	0	0	0	1	0	0	0	3	5	6	0	2	0	0	0	0
OTU_690	Chordata	Actinopteri	Perciformes	Percidae	Sander	Sander lucioperca	98.113	manual check	GCGGTTATACAGGCCCAAGTTGATAGACATCGGCGTAAAGCGTGGTTAAGACAAAAACAAAACTAAAGCCGAACACCTTCAGAGCTGTTATACGCACCCGAAGGTAAGAAGTTCAACCACGAAAGTGGCTTTATTACCCCTGAACCCACGAAAGCTGAGAAA	2	1	0	0	3	1	0	6	0	0	2	0	2	0	0	2	2	4	1	2	2	0	0	0	0	0	2	1	0	1	3	1	2	0	3	0	2	0	0	0
OTU_691	Chordata	Actinopteri	Gobiiformes	Gobiidae	Neogobius		96.97	Midori2	GCGGTTATACGAGAGGCCCAAGTTGACAAAATCGGCGAAAAGCGTGGTTAGTGATATCACCTCCACTAAAGCCAAACACCTTCAAGGCTGTAATACGCCCCCGAAGACAGGAAGCCCAAATCACGAAAGTAGCTTTAATTCATGAAGCCACGAAAGCTACGATA	0	0	0	0	0	2	1	0	0	0	0	0	0	1	1	0	1	2	0	0	0	0	1	0	0	0	0	0	0	1	0	0	2	1	2	0	2	0	0	0
OTU_692	Chordata	Actinopteri	Perciformes	Gasterosteidae	Gasterosteus	Gasterosteus aculeatus	98.125	Midori2	GCGGTTATACGAGAGGCCCAGGTTGATGAATTACGGCGTAAAGAGTGGTTAAGCTAAAATTAAAACTAAAGCCGAACACCCTCAAAGCTGTTATACGCATCCGGAGGTGAGAAGTTCAACCACGAAGGTGGCTTTATCTAACCTGAAGCCACGAAAGCTAGGAAA	3	5	5	7	12	12	2	3	0	3	6	2	4	2	9	8	3	4	3	8	0	6	9	6	5	6	7	4	8	2	2	6	6	3	2	5	14	25	0	0
OTU_693	Chordata	Actinopteri	Perciformes	Percidae	Sander		96.97	Midori2	GCGGTTATACGAGAGGCCCAAGTTGATAGACATCGGCGTAAAGCGTGGTTAAGACAAAAACAAAACTAAAGCCGAACACCTTCAGAGCTGTTATACGCACCCGAAGGTAAGAAGCCCAATCACGAAAGTGGCTTTATAGCCCCTGAACCCACGAAAGCTACGATA	16	44	2	11	8	1	10	18	22	7	18	18	8	3	0	23	29	26	15	6	1	0	4	5	21	4	15	21	3	16	12	13	18	6	10	21	9	8	0	0
OTU_694	Chordata	Actinopteri	Perciformes	Percidae	Sander	Sander lucioperca	97.546	manual check	GCGGTTATACGAGTGCCCAAGTTGATAGACATCGGCGTAAAGCGTGGTTAAGACAAAAACAAAACTAAAGCCGAACACCTTCAGAGCTGTTATACGCACCCGAAGGTAAGAAGTTCAACCACGAAAATGGCTTTATTACCCCTGAACCCACGAAAGCTAGGAAA	0	0	0	1	0	0	0	0	0	0	0	0	0	1	0	0	0	1	0	0	2	0	0	0	0	0	1	0	1	2	1	0	2	0	0	0	0	0	0	0
OTU_695	Chordata	Actinopteri	Cypriniformes	Leuciscidae	Leuciscus	Leuciscus leuciscus	97.024	Midori2	GCGTTAAACGAGAGGCCCTAGTTAATAATACACGGCGTAAAGGGTGGTTAAGGAGAGCATAACAATAAAGCCGAATGGCCCTTTGGCTGTCATACGCTTCTAGGTGTCCGAAGTTCAACATACGAAAGTAGTTTTAATAACGCCCACCTGACCCCACGAAAGCTGAGAAA	6	9	12	9	19	7	17	16	8	5	4	14	20	16	50	78	27	25	31	24	10	37	6	6	4	13	26	31	3	5	55	17	73	36	3	8	2	4	0	0
OTU_696	Chordata	Actinopteri	Gobiiformes	Gobiidae	Neogobius		96.97	Midori2	GCGGTTATATAGGCCCAAGTTGACAAAAATCGGCGAAAAGCGTGGTTAGTGATATCACCTCCACTAAAGCCAAACACCTTCAAGGCCGTAATACGCCCCCAAGACAGGAAGCCCAATCACGAAAGTAGCTTTAATTTTCATGAAGCCACGAAAGCTAGGAAA	0	0	0	0	1	0	0	0	0	0	0	0	0	0	0	0	0	0	0	0	0	0	0	0	0	0	1	0	0	0	0	0	0	0	0	0	0	0	0	0
OTU_697	Chordata	Actinopteri	Cypriniformes	Cyprinidae	Capoeta		97.647	Midori2	GCGGTAGACGAGAGGCCCTAGTTGATATTACAACGGCGTAAAGGGTGGTTAAGGATAAACAATAATAAAGCCAAATGGCCCCTTGGCCGTCATACGCTTCTAGGTGTCCGAGGCCCTATATACGAAAGTAGCTTTAATTAACCCGCCTGACCCCACGAAAACTGAGAAA	1	13	41	17	11	4	53	43	16	2	21	31	53	31	26	19	9	25	10	21	0	2	8	31	15	6	11	22	13	6	38	8	14	18	15	7	8	11	0	0
OTU_698	Chordata	Actinopteri	Cypriniformes	Leuciscidae	Rutilus	Rutilus rutilus	97.661	Midori2	GCGGTTAAACGAGAGGCCCTAGTTAATAATACACGGCGTAAAGGGTGGTTAAGGGGAGCACAATAATAAAGCCAAATGGCCCTTTGGCTGCCATACGCTTCTAGGTGTCCGAAGCCCAATATACGAAAGTAGCTTTAATAAAGCCCACCTTACCCCACAAAAGCTGAGAAA	11	9	3	6	96	15	56	14	85	163	69	127	36	14	2	32	176	62	7	17	283	3	0	4	5	8	2	2	2	52	6	61	8	43	87	76	20	5	0	0
OTU_699	Chordata	Actinopteri	Perciformes	Percidae	Sander		96.97	Midori2	GCGGTTATACGAGAGGCCCAAGTTGATAGACATCGGCGTAAAGCGTGGTTAAGATTACAAAACTAAAGCCGAACACCTTCAGAGCTGTTATACGCACCCGAAGGTAAGAAGTTCAACCACGAAAGTGGCTTTATTACCCCTGAACCCACGAAAGCTACGATA	1	4	0	3	1	0	4	0	2	0	0	0	1	0	0	4	2	3	1	0	1	0	0	0	0	0	3	1	0	0	2	0	3	0	2	0	0	2	0	0
OTU_700	Chordata	Actinopteri	Cypriniformes	Leuciscidae	Leuciscus	Leuciscus leuciscus	98.246	Midori2	GCGGTTAAACGAGAGGCCCTAGCTAATAATACACGGCGTAAAGGGTGGTTAAGGAAATCACAATAATAAAGCCAAATGGCCCTTTGGCTGTCATACGCTTCTAGGTGCCCGAAGCCCAATATACGAAAGTAGCTTTAATAAAGCCCACCTGACCCCACGAAAGCTGAGAAA	44	70	97	33	115	2	2	23	42	56	129	14	38	111	15	21	22	65	36	13	14	5	1	1	49	14	24	0	48	6	54	27	87	180	2	9	58	13	0	0
OTU_701	Chordata	Actinopteri	Cypriniformes	Cyprinidae	Capoeta		96.951	Midori2	GCGGTTAGACGAGAGGCCCTAGTTGATATTACAACGGCGTAAAGGGTGGTTAAGGATAAACAAAAATAAAGCCAAATGGCCCCTTGGCCGTCATACGCTTCTAGGTGTCCGAGGCCCTATATACGAAAGTAGCTTTAATTAACCCGCCTGACCCCACGAAAGCTACGATA	12	31	64	81	3	23	97	65	28	34	33	91	69	41	65	60	29	46	47	34	0	0	28	21	28	18	52	62	28	12	43	31	34	27	20	13	21	17	0	0
OTU_702	Chordata	Actinopteri	Gobiiformes	Gobiidae	Neogobius		95.181	Midori2	GCGGTTAAACGAGGGGCCCTAGTTAATAATACGCGGCGAAAAGCGTGGTTAGTGATATCACCTCCACTAAAGCCAAACACCTTCAAGGCTGTAATACGCCCCCGAAGACAGGAAGCCCAATCACGAAAGTAGCTTTAATTTTCATGAAGCCACGAAAGCTAGGAAA	53	88	71	66	38	75	92	80	106	128	114	132	182	116	116	163	91	128	113	108	39	78	51	59	47	103	104	92	64	57	137	130	162	141	72	70	69	92	0	3
OTU_703	Chordata	Actinopteri	Gobiiformes	Gobiidae	Neogobius	Neogobius melanostomus	98.758	Midori2	GCGGTTAAACGAGAGGCCCAAGTTGACAAAAATCGGCGAAAAGCGTGGTTAGTGATATCACCTCCACTAAAGCCAAACACCTTCAAGGCTGTAATACGCCCCCGAAGACAGGAAGCCCAATCACGAAAGTAGCTTTAATTTTCATGAAGCCACGACAGCTATGGTA	13	20	16	16	16	26	17	11	7	25	14	14	14	11	20	19	16	16	12	24	14	9	12	16	18	19	21	25	1	11	29	24	29	20	6	10	10	27	0	2
OTU_704	Chordata	Actinopteri	Cypriniformes	Leuciscidae	Abramis	Abramis brama	98.193	Midori2	GCGGTTAAACGAGAGGCCCCAGTTAATAATACACGGCGTAAAGGGTGGTTAAGGAAAGTATTAACAATAAAGCCGAATGGCCCTTTGGCTGTCATACGCTTCTAGGTGTCCGAAGTTCAACATACGAAAGCCCTTTAATAACGCCCACCTGACCCCACGAAAGCTACGATA	14	14	5	4	7	11	4	7	2	3	9	8	5	15	11	12	9	10	17	2	1	11	14	7	13	8	23	11	9	7	6	4	12	4	6	5	9	13	0	0
OTU_705	Chordata	Actinopteri	Cypriniformes				94.737	Midori2	GCGGTTAACGAGAGGCCCTAGTTGATATTACAACGGCGTAAAGGGTGGTTAAGGATAAACAAAAATAAAGTCAAATGGCCCCCCGTCATACGCTTCTAGGAGTCCGAAGCCCAATATACGAAAGTAGCTTTAATAAAGCCCACCTGACCCCACGAAAGCTGAGAAA	34	75	85	72	61	27	107	73	79	109	87	176	241	209	171	143	146	157	98	149	8	0	13	5	24	72	35	31	29	35	88	76	131	128	43	40	43	25	0	0
OTU_706	Chordata	Actinopteri	Gobiiformes	Gobiidae	Neogobius		96.988	Midori2	GCGGTTATACGAGAGGCCCAAGTTGACAAAAATAGGCGAAAAGCGTGGTTAGTGAGATCACCTCCACTAAAGCCAAACACCTTCAAGGCTGTAATACGCCCCCGAAGACAGGAAGCCCAATCACGAAAGTAGCTTTAATTTTCATCAAGCCACGAAAGCCAGTAAA	0	0	0	0	0	0	0	0	0	0	0	0	0	0	0	0	0	0	0	0	0	1	0	0	0	0	0	0	0	0	1	0	0	0	0	0	0	0	0	0
OTU_707	Chordata	Actinopteri	Gobiiformes	Gobiidae	Neogobius		96.988	Midori2	GCGGTTATACGAGAGGCCCAAGTTGACAAAAATCGGCGAAAAGCGTGGTTAGTGATATCACCCCCACTAAAGCCAAACACCTTCAAGGCTGTAATACGCCCCCGAAGACAGGAAGCCCAATCACGAAACTAGCTTTAATTTTCATTAGCCATGAAAGCTAGGAAA	0	0	2	2	0	1	2	0	0	1	0	1	0	0	2	0	2	1	0	0	2	1	1	0	1	0	1	1	1	3	1	1	0	1	0	2	0	1	0	2
OTU_708	Chordata	Actinopteri	Cypriniformes	Leuciscidae	Vimba/Blicca	Vimba vimba / Blicca bjeorkna	99.415	manual check	GCGGTAAACGAGAGGCCCCAGTTAATAATACACGGCGTAAAGGGTGGTTAAGGAAAGTATAACGATAAAGCCGAATGGCCCTTTGGCTGTCATACGCTTCTAGGTGTCCGAAGTCCAATATACGAAAGTAGCTTTAATAGAGCCCACCTGACCCCACGAAAGCTGAGAAA	0	0	4655	0	13358	0	8450	0	0	0	0	1	0	5467	1	2	0	0	0	0	0	0	2	0	0	7216	0	0	0	0	0	0	2814	2	0	0	0	3406	0	0
OTU_709	No Match	No Match	No Match	No Match	No Match	No Match	No Match	Midori2	ACCTACGAATTCAGGAACTTGCGCGCTTGGCCGCTTGGTAGTCCGCTACGATGTCAGCGGCGGAGACTTGGCCGCGCGTCGATTTCTCGATCACCGCCATTGTGTCAGGGCCAGGCCACTGTTGGCCGCGCTCCAATTTGCACAGGTGGCCGACAGACAGACCGCTCCGCTCAG	0	0	0	0	0	0	0	0	0	0	0	0	0	0	0	0	0	0	0	0	0	0	0	0	0	0	22	0	0	0	0	0	0	0	0	0	0	0	0	0
OTU_710	Chordata	Aves	Passeriformes	Certhiidae	Troglodytes	Troglodytes troglodytes	98.315	Midori2	GCGGTTATACAGGAGGCCCAAGTTAACATTATAACGGCGTAAAGCGTGGTAACATGCTATCCAAGTAACTAAGATTAAAAAGCGACTAGCCGTCACAAGCCCAAGTTGCCCGTAAGGCCACTCACCCAAAGAAAATCTTAGACTAACGATCAATTGAAATCCACGAAAGCCAGGGCC	0	0	0	0	0	0	0	0	0	0	0	0	0	0	0	0	0	0	0	0	0	0	0	0	0	0	0	0	0	0	0	0	0	0	0	0	0	0	0	0
OTU_711	No Match	No Match	No Match	No Match	No Match	No Match	No Match	Midori2	CCGGCACGTTTGGATTGGTTTTGGCTTCCTGTGCCGAAGTGGAAACCCGAATGTTGCCTGAAACCGTTTTTCAACGCCTCTCAATTCGTGAAGCCCAACGGACTGAGGCGTTCGGGTTTCGAAACGTTCCATTGTGCACTGGACAACCGACCAACTGTACCAC	0	0	0	0	0	0	0	0	0	0	0	0	0	0	0	0	0	0	0	0	0	0	0	0	18	0	0	0	0	0	0	0	0	0	0	0	0	0	0	0
OTU_712	Chordata	Mammalia	Rodentia	Cricetidae	Microtus	Microtus arvalis	97.546	Midori2	TCGGTCATACGATTAACCAAACTAATTATTCTCGGCGTAAAACGTGTTACTAGAGATATGCGAAATAGAATTAAAATCCATCCAATATGTGAAAATTCATCGCTGGACCTAAACCAATGACGAAAGTAATTCTAATAAGCCTGATACACGATAGCTAAGGTA	0	0	0	0	0	0	0	0	0	0	0	0	0	0	0	0	0	0	0	0	0	0	0	0	0	0	0	0	0	0	0	0	0	0	0	0	0	0	0	0
OTU_713	Chordata	Mammalia	Artiodactyla	Bovidae			96.951	Midori2	GCGGTCATACGATTAACCCAAGCGAACAGGAGTACGGCGTAAAACGTGTTAAAGCACCATACCAAATAGGGTTAAATTCTAACTAAGCTGTAAAAAGCCATGATTAAAAAATAAATGACGAAAGTGACCCTACAATAGCCGACGCACTATAGCTAAGACC	26	16	28	15	20	52	58	5	11	24	17	8	10	13	4	19	6	29	16	14	76	35	3	13	32	3	4	3	29	13	2	10	24	16	23	5	21	18	0	0
OTU_714	Chordata	Actinopteri	Gobiiformes	Gobiidae	Neogobius		96.386	Midori2	GCGGTTATACGATAGGCCCAAGTTGACAAAAATCGGCGAAAAGCTTGGTTTGATATCACCTCCACTAAAGCCAAACACCTTCAAGGCTGTAATACGCCCCCAAGACAGGAAGCCCAATCACGAAAGTAGCTTTAATTTCATGAAGCCACGAAAGCTAGGAAA	0	0	0	0	0	0	0	0	0	1	0	0	0	0	0	0	0	0	0	0	0	0	0	0	0	0	0	0	0	0	0	0	0	0	0	0	0	0	0	0
OTU_715	No Match	No Match	No Match	No Match	No Match	No Match	No Match	Midori2	TCCTTCACGCCAACGGCTAATTTTCGAAGTCCCATTGGGATCTATTCAAACTGAAATATTCAGTTTCAGATCTTTCAATGCTGCAGCTTGTACCTTTGCTTGCTCTGTCGAACATCCTAATTTTTTCTCTGTTGAAAAAACTTATGCAGCACCTCCTGTTC	0	0	0	0	0	0	0	0	0	0	0	0	0	22	0	0	0	0	0	0	0	0	0	0	0	0	0	0	0	0	0	0	0	0	0	0	0	0	0	0
OTU_716	No Match	No Match	No Match	No Match	No Match	No Match	No Match	Midori2	ACCACACTGATGTCGGTGCTGTTGTCTTTTTCGCGGAATTGCTGCTGCAACACGGCTGCCAAACTGTTCAGGTTTGTAGCGGCAGTCGGTGCGAGTTCGACCGACACACCGCCCAGCGTGGCTTGAAATTTGGAAAAGCCAGGATTGGCGCCGGTCC	0	0	0	0	0	0	0	0	0	0	0	0	0	0	0	0	0	0	0	0	0	0	0	0	0	0	0	0	0	0	0	0	0	18	0	0	0	0	0	0
OTU_717	No Match	No Match	No Match	No Match	No Match	No Match	No Match	Midori2	TTGAAGGCGCAGCCAGCGCAGTGCATCCCGTCCACGCTGATCGTGGTCGCCGGCGGGTCGGCCGCTTGAACCAGTCTCGCGGCCGACAAAGTGAAAGTGGACAGGATGCCAAGCAAAACGGAACGTCGGGTGGCCATGCAGATTCTCCGAAATAAATGCACTG	0	0	0	0	0	2	23	0	0	0	0	0	0	0	0	0	1	0	0	0	0	0	0	0	0	1	0	0	0	0	0	0	0	0	0	0	0	0	0	0
OTU_718	No Match	No Match	No Match	No Match	No Match	No Match	No Match	Midori2	ATGGCGTGACGATCCTCTTTACCCGTGCCGGCTTCAATGATGTCCCATGGGGTCTCGACTACAGGAAAAACCATGAAACCCACAGCACCCGTTCCTCTGGAAATCCATTTTCGTCATCTGGCCGACTCCGAGGCCCTTGAGACCCACATACGCCACCATGCCGA	0	0	0	0	1	1	5	0	0	3	8	2	0	0	0	0	0	10	0	0	0	0	2	0	0	0	0	0	0	0	0	0	0	4	0	0	0	0	0	0
OTU_719	Chordata	Actinopteri	Gobiiformes	Gobiidae	Neogobius		96.988	Midori2	GCTGTTATACGAGAGGCCCAAGTTTACAAAAATCGGCGAAAAGCGTGGTTAGTGATATCACCTCCACTAAAGCCAAACACCTTCAAGGCTGTAATACGCCCTCGAAGACAGGAAGCCCAATCACGAAAGTAGCTTTAATTTTCATGAAGCCACGAAAACTAGGGAA	1	0	0	0	1	0	1	1	0	1	0	0	0	0	0	2	0	0	1	1	1	2	1	2	0	1	1	0	0	0	0	1	0	0	0	0	0	1	0	0
OTU_720	Chordata	Actinopteri	Gobiiformes	Gobiidae	Neogobius	Neogobius melanostomus	98.16	Midori2	GCGTTATACGATAGGCCCAAGTTGACAAAAATCGGCGAAAAGCGCGGTTAGTGATATCACCTCCACTAAAGCCAAACACCTTCAAGGCTGTAATACGCCCCCGAAGACAGCAAGCCCAATCACGAAAGTAGCTTTAATTTTCATGAAGCCACGAAAGCTAGGAAA	0	1	3	0	0	0	2	0	4	1	1	1	2	0	2	0	1	1	0	0	2	0	1	0	2	1	0	0	2	0	1	3	0	1	1	0	1	0	0	0
OTU_721	Chordata	Actinopteri	Gobiiformes	Gobiidae	Neogobius	Neogobius melanostomus	97.576	Midori2	GCGGTTACGAGAGGCCCAAGTTGACAAAAATCGGCGAAAAGCGTGGTTTGATATCACCTCCACTAAAGCCAAACACCTTCAAGGCTGTAATACGCCCCCGAAGACAGGAAGCCCAATCACGAAAGTAGCTTTAATTTTCATGAAGCCACGAAAGCTAGAAAA	0	0	0	0	0	0	0	0	0	0	0	0	0	0	0	0	0	0	0	0	0	0	0	0	0	0	0	0	0	0	0	0	0	0	0	0	0	0	0	0
OTU_722	Chordata	Actinopteri	Perciformes	Percidae	Perca	Perca fluviatilis	99.351	Midori2	CGTTCGACGCCCAAGTTGATAGACATCGGCGTAAAGCGTGGTTAAGATTAAAGACAATACTAAAGCCGAACACCTTCAGAGCTGTTATACGCATCCGAAGGTAAGAAGTTCAACCACGAAAGTGGCTTTATAGCCCCTGAACCCACGAAAGCTACGATA	0	3	0	2	0	1	0	1	0	0	1	0	0	0	1	1	1	0	1	1	0	1	3	0	0	0	0	0	0	1	0	2	0	1	1	0	0	0	0	0
OTU_723	Chordata	Actinopteri	Perciformes	Percidae	Perca		96.988	Midori2	GCGGTTATACGAGAGGCCCAAGTTGATAGACATCGGCGTAAAGCGTGGTATATTAAGGACAATACTAAAGCCGAACACCTTCAGAGCCGTTATACGCATCCGAAGGTAAGAAGTTCAACCACGAAAGTGGCTTTATAGCCCCTGAACCCACGAAAGCTACGATA	3	15	0	7	1	0	5	1	2	2	2	1	2	1	0	1	2	1	3	0	1	9	1	1	4	2	5	1	0	4	1	2	4	5	5	3	1	0	0	0
OTU_724	No Match	No Match	No Match	No Match	No Match	No Match	No Match	Midori2	AGCAACCACTAACCAGCACCCAAAGCGAGCCGCCAGTCAATTTTGCAAGGTGAGATTCAATGTGTTTTTTTGTTTCAACAATTTTTCGCACTGACACATAACGCATTTTTTCAATTAAAACATAACGTCCCTCCCTGTCCGACGTGGGATATCTCGACC	0	0	0	0	0	0	0	0	0	0	0	0	0	0	0	0	0	0	0	0	0	0	0	14	0	0	0	0	0	0	0	0	0	0	0	0	0	0	0	0
OTU_725	No Match	No Match	No Match	No Match	No Match	No Match	No Match	Midori2	TTGAAACCATTGCCGACCAGAAGGCCATCGGAGTTACGATTGAAACAAGCTCTGTTGCATTGACCCCTTGCTGTCCTCGCTGTCCTAGCACATCTTCCACCGCGGAAGAAACGGTCACATCGTACGTCTCACCATTTGCATAAACCTCCAGAAGGCGAAAGTTCA	0	0	0	0	0	0	0	0	0	0	20	0	0	0	0	0	0	0	0	0	0	0	0	0	0	0	0	0	0	0	0	0	0	0	0	0	0	0	0	0
OTU_726	Chordata	Actinopteri	Perciformes	Gasterosteidae	Gasterosteus		95.783	Midori2	GCGGTTATACGAGAGGCCCAAGTTGATGAATTACGGCGTAAAGCGTGGTTAAGATTAAAGACAATACTAAAGCCGAACACCCCCAAAGCTGTTATACGCATCCGGAGGTGAGAAGTTCAACCACGAAGGTGGCTTTATCTAACCTGAACCCACGAAAGCTACGGCA	2	3	0	0	0	2	0	1	0	0	0	1	1	2	0	0	0	0	0	0	0	0	2	0	0	0	0	0	1	0	0	0	0	0	0	0	1	3	0	0
OTU_727	Chordata	Actinopteri	Perciformes	Percidae	Perca	Perca fluviatilis	97.561	Midori2	GCGGTTATACGAGAGGCCCAAGTTGATAGACATCGGCGTAAAGCGTGGTTAAGATTAAAGACAATACTAAAGCCGAACACCTTCAAAGCTGTTATACGCACCCGAAGGTAAGAAGTTCAACCACGAAAGTGGCTTTATAACCGCTGAACCCACGAAAGCTACGACA	1	3	29	0	0	0	0	0	0	0	0	0	34	1	0	0	3	41	0	0	0	0	0	0	2	0	0	0	0	0	0	1	3	1	22	0	0	0	0	0
OTU_728	Chordata	Actinopteri	Gobiiformes	Gobiidae	Neogobius		96.894	Midori2	GCGGTTATACGATAGGCCCAAGTTGACAAAAATCGGCGAAAAGCGTGGTTAGTGATATCACCTCCACTAAAGCCAAACACCTTCACGCTGTAATACGCCCCCGAAGACAGGGAGCCCAATCACGAAATAGCTTTAATTTTCATGAAGCCACGAAAGCTAAAA	0	0	0	0	0	0	0	0	0	0	0	0	0	0	0	0	0	0	0	0	0	0	0	0	0	0	0	0	0	0	0	0	0	0	0	0	0	0	0	0
OTU_729	Chordata	Mammalia	Rodentia	Cricetidae	Microtus		95.732	Midori2	GCGGTTATACGATTAACCCAAACTAATTATTCTCGGCGTAAAACGTGTTACTATGCAAAATAGAATTAAAATCCATCCAATATGTGAAAATTCATCGCTGGACCTAAAACCAATGACGAAAGTAATTCTAATAAGCCTGATACACGATAGCTAAGGTA	0	0	0	0	0	0	0	0	0	0	0	0	0	0	0	0	0	0	0	0	0	0	0	0	0	0	0	0	0	0	0	0	0	0	0	0	0	0	0	0
OTU_730	Chordata	Actinopteri	Perciformes	Percidae			92.169	Midori2	GCGGTTATACGAGAGGCCCAAGTTGATAGACATCGGCGTAAAGCGTGGTTAAGATTAAAGACAATACTAAAGCCAAACACCTTCAAGGCTGTAATACGCCCCCGAAGACAGGAAGCCCAATCACGAAAGTAGCTTTATAGCCCCTGAACCCACGAAAGCTACGATA	0	0	0	0	0	0	0	0	0	0	0	0	0	0	0	0	1	0	0	0	0	0	0	0	2	0	0	0	0	0	0	0	0	0	0	0	2	1	0	0
OTU_731	Chordata	Actinopteri	Cypriniformes	Leuciscidae	Leuciscus		96.512	Midori2	GCGGTTAAACGAGAGGCCCTAGTTGATTTTATCACGGCGTAAAGGGTGGTTAAGGAAAGCATAACAATAAAGCCGAATGGCCCTTTGGCTGTCATACGCTTCTAGGTGTCCGAAGCCCAATATACGAAAGTAGCTTTAATAAAGCCCACCTGACCCCACGAAAGCTAGGAAA	36	21	27	21	15	1	3	3	15	19	77	1	40	0	0	53	29	111	31	14	0	0	1	0	0	0	1	2	3	8	37	1	5	31	0	9	0	0	0	0
OTU_732	Chordata	Actinopteri	Cypriniformes				96.471	Midori2	GCGGTTATACGAGAGGCCCAAGTTGATATTACAACGGCGTGAAGGGTGGTTAAGGATAAACAAAAATAAAGTCAAATGGCCCCTTGGCCGTCATACGCTTCTAGGAGTCCGAAGCCCTAATACGAAAGTAGCTTTAATAACGCCCACCTGACCCCACGAAAGCTGAGAAA	5	9	6	6	1	14	9	2	6	4	4	9	14	6	16	9	11	11	8	7	0	0	0	4	0	4	9	5	7	1	13	4	10	7	3	3	6	1	0	0
OTU_733	Chordata	Actinopteri	Perciformes	Percidae			92.771	Midori2	GCGGTTATACGAGAGGCCCAAGTTGACAAAAATCGGCGTAAAGCGTGGTTAATAACTTATTTACTAAAGCCGAACACCTTCAGAGCTGTTATACGCATCCGAAGGTAAGAAGTTCAACCACGAAAGTGGCTTTATAGCCCCTGAACCCACGAAAGCTACGATA	6	5	9	4	2	1	2	0	0	1	3	2	4	4	4	2	4	2	8	3	0	0	6	3	1	4	3	0	2	4	2	3	3	3	2	8	1	1	0	0
OTU_734	Chordata	Actinopteri	Cypriniformes	Leuciscidae			92.442	Midori2	GCGGATATACGAGAGGCCCAAGTTGACAAAAATCGGCGAAAAGGGTGGTTAAGGAAAGCATTATAATAAAGCCAAATGGCCCTTTGGCTGTCATACGCTTCTAGGTGTCCGAAGTTCAACATACGAAAGTAGCTTTAATAACGCCCACCTGACCCCACGAAAGCTGAGAAA	13	13	20	38	31	41	40	38	41	41	37	28	23	33	60	58	25	34	31	27	10	19	35	59	39	23	62	36	23	33	59	51	62	43	32	35	30	38	0	1
OTU_735	Chordata	Mammalia	Rodentia	Cricetidae	Microtus	Microtus arvalis	97.516	Midori2	GCGGTCATACGATTAACCCAAACTAATTATTCTCGGCGTAAAACGTGTTACTAGAATATTCAAAATAGAATTAAAATCCATCCAATATGTGAAAATTCATCGCTGGACCTAAAACCAATGACGAAAGTAATTCTAATAAGCCTGATACACGAAAGCTGAGAAA	0	0	0	0	1	0	0	4	3	7	1	0	0	0	0	0	0	0	1	3	0	0	0	0	0	0	0	0	0	0	1	0	1	0	0	0	0	0	0	0
OTU_736	Chordata	Actinopteri	Cypriniformes	Leuciscidae	Leuciscus	Leuciscus leuciscus	97.076	Midori2	GCGGTTATACGAGAGGCCCAAGTTGATAATACACGGCGTAAAGGGTGGTTAAGGAGAGCATAACAATAAAGCCGAATGGCCCTTTGGCTGTCATACGCTTCCAGGTGTCCGAAGCCCAATATGCGAAAGTAGCTTTAATAAAGCCCACCTGACCCCACGAAAGCTGAGAAA	4	2	4	7	0	2	1	1	3	0	1	1	13	6	13	16	2	1	4	1	0	1	0	1	0	0	0	13	2	0	6	3	22	27	0	1	2	0	0	0
OTU_737	Chordata	Actinopteri	Cypriniformes	Leuciscidae			93.333	Midori2	GCGGTTAAACGAGAGGCCCTAGTTAATAATACACGGCGTAAAGGGTGGTTAAGGAGAGCATAACAATAAAGCCGAATGGCCCTTTGGCTGTCATACGCTTCTAGGTGTCCGAAGTTCAACATACGAAAGTAGCTTTATTACCCCTGAACCCACGAAAGCTACGATA	3	8	7	7	7	2	4	12	5	5	11	8	1	4	3	16	11	9	6	8	1	0	2	6	7	6	12	14	3	4	21	12	25	7	9	13	3	0	0	0
OTU_738	Chordata	Actinopteri	Cypriniformes	Leuciscidae	Rutilus	Rutilus rutilus	97.661	Midori2	GCGGCTAAACGAGAGGCCCTAGTTAATAATACACGGCGTAAAGGGTGGCTAAGGGAAGCACAATAATAAAGCCAAATGGCCTTTTGGCTGTCATACGCTTCTAGGTGTCCGAAGCCCAATATACGAAAGTAGCTTTAATAAAGCCCACCTGGCCCCACGAAAGCTGAGAAA	1	7	0	0	1	1	1	1	1	7	3	9	6	3	5	5	6	4	1	1	0	4	0	0	0	2	2	0	0	0	0	2	3	2	6	4	4	1	0	0
OTU_739	Chordata	Mammalia	Rodentia	Cricetidae	Microtus		95.152	Midori2	GCGGTCATACGATTAACCCAAACTAATGATTCTCGGTGTCAAACGTGTTACTAGAAACATGCAAAAATAAAATTAAAATCCATCCGATATGTGAAAATTCATCGCGGGACCTAAAACCAATGACGAAAGTAATTCTAATAAACCTGATACACGATAGCTAAGATA	0	0	0	0	0	0	0	0	0	0	0	0	0	0	0	0	0	0	0	0	0	0	0	0	0	0	0	0	0	0	0	0	0	0	0	20	0	0	0	0
OTU_740	Chordata	Actinopteri	Gobiiformes	Gobiidae	Neogobius		96.988	Midori2	GCGGTTATACGAGAGGCCCAAGTTGACAAAAATCGGCGAAAAGCGTGGTTAGTGATATCACCTCCACTAAAGCCAAACACCTTCAAGGCTGTAATACGCCCCCGAAGACGAACCCCAATCACAAAAATAGCTTTAATTTTCATGAAGCCACGAAAGCTAGGAAA	0	0	0	0	0	0	0	0	0	0	0	0	0	0	0	0	0	0	0	0	0	0	0	0	0	0	0	0	0	0	0	0	0	0	0	0	0	0	0	0
OTU_741	No Match	No Match	No Match	No Match	No Match	No Match	No Match	Midori2	TCTTTCCTTTCTTCCTTATGCAAATCTCACCATTCCACATTTATCTTTGGCAAGTCGCCGATACCGCGCAGGGTATGTTAACTCCAGTTGTCGTAGTTGCCGTATTTTGTTCGCTTATTCTGCTAGGTATGTATGTCGCCCTAAGCGACAGTCCTGATGAGCGTGCATTATATAC	0	0	0	0	0	0	0	0	0	0	0	0	0	0	0	0	18	0	2	0	0	0	0	0	0	0	0	0	0	0	0	3	0	0	0	0	0	0	0	0
OTU_742	No Match	No Match	No Match	No Match	No Match	No Match	No Match	Midori2	CTGTACTGGAATGAATCCGGCGTACCGGTATCTGATACCTTCAACGATGTGTACTACTCGCAGGAGAATGGACTCGAAGAAAGTCGTCACGTTTTCCTGATGGGCAATGATCTGCCGCAGCGCTGGCACAACCACCCGCGGCGACATTTTTGTATTGG	0	0	0	0	0	0	0	2	0	0	0	0	0	0	0	0	0	14	0	0	0	0	0	0	0	3	0	0	0	0	0	0	0	0	0	0	0	0	0	0
OTU_743	No Match	No Match	No Match	No Match	No Match	No Match	No Match	Midori2	AGCAGCATTATTCCGGAAAATGATGATTTGGAACAAGGCATTTGAAGTATGCACTCCTGGTGCATCGCCTCTGAGCACCCCTGGTCAACGTTATGTTTGGCTTAAGTCTAAGGTCCCATCCGGGCCAGGTGAACTATGGGGAAAGTTTGATAAGAAATACAACTTCAATCATAG	0	0	0	0	0	0	0	0	3	19	0	0	0	0	0	0	0	0	0	0	0	0	0	0	0	0	0	0	0	0	0	0	0	0	0	0	0	0	0	0
OTU_744	No Match	No Match	No Match	No Match	No Match	No Match	No Match	Midori2	CGAGACCTCACTGGGCATCAGGTCGCGCGCACCGCGCAAGCCCACGGCATTGAGTTTCATGAGCACGATGTCGCGGATCAGCGACTCAGGCAGGTCGGTGTGCTCGCGCAGCGGAAACGCGACGTTGTCGAACACGCTGGAGTCGGTGAACAAGGCGC	0	0	0	0	0	0	0	0	0	0	0	0	0	0	0	0	0	0	0	0	0	0	0	0	0	8	0	0	0	0	0	5	0	0	0	0	0	0	0	0
OTU_745	No Match	No Match	No Match	No Match	No Match	No Match	No Match	Midori2	CAGTCTGCCAGAATTCAATTTCAGCACTGTTCTGCCTACAAGTGTATCACCTACAGTGTACTTGCCAAATGTGAGGATTGGCAGTACATTTGTACACTGGGTTTTAAGTCGCATTTTAAGTTAGTAGTGTTTTTGGGGATCAGAACGGGGACGTCATGAGCGCCCGCGGCCATCAG	0	0	0	0	0	0	0	0	0	0	0	3	0	0	0	12	0	0	0	0	0	0	0	0	0	1	0	8	0	2	4	0	0	1	0	0	0	1	0	0
OTU_746	Chordata	Actinopteri	Cypriniformes	Leuciscidae	Rutilus	Rutilus rutilus	97.661	Midori2	GCGGTTAAACGAGAGGCCCTAGTTAATAATACACGGCGTAAAGGGTGGTTAAGGGAAGCACAATAATAAAGCCAAATGGCCCTTTGGCTGTCATACGCTTCTAGGTGTCCGAAGCCTAATATATGAAAGTAGTTTTAATAAAGTCCACCTGACCCCACGAAAGCTGAGAAA	0	1	3	1	2	1	0	3	0	0	1	1	4	2	0	0	0	2	1	0	0	0	1	0	1	5	3	0	0	1	0	2	1	3	2	3	2	0	0	0
OTU_747	Chordata	Actinopteri	Perciformes	Percidae	Perca		96.988	Midori2	GCGGTTATACGAGAGGCCCAATTTGATAGACATCGGCGTAAAGCCTGGTTAAGATTAAAGACAATACTAAAGCCGAACACCTTCAGAGCTGTTATACCCATCCGAAGGTAAGAAGTTCAACCACGAAAGTGGCTTTATTACCCCTGAACCCACGAAAGCTACGATA	0	0	0	0	0	0	0	0	0	0	0	0	0	0	0	0	0	0	0	0	0	0	0	0	0	0	0	0	0	0	0	0	0	0	0	0	0	0	0	0
OTU_748	No Match	No Match	No Match	No Match	No Match	No Match	No Match	Midori2	CATTCAGAAATTTTCTTATCCTCCCCTTCCACCTTTCTCCATGGTGCTATACCCATATCCTGAAAGGACTTTCGCTCCTCCGTAAAAACAACACCTCCTGGTATGCCAAATATGTCGGTGTGTACAATCACAATGTCGAATGGAATGATGCCGCAATGTTTACGCCATTTCAACCGG	0	0	0	0	0	0	0	0	0	0	0	0	0	8	0	0	0	0	0	4	0	0	0	7	0	0	0	0	0	0	0	4	0	0	0	0	0	0	0	0
OTU_749	Chordata	Mammalia	Rodentia	Muridae	Rattus		96.429	Midori2	GCGGTCATACGATTAACCCCAAATTATTTTCTGCGTAAAACGTGCCAACTATAAATCTCATAATAGAATTAAAATCCAACTTATATGTGAAAATTCATTGTTAGGACCTAAGCCCAATAACGAAAGTAATTCTAATCATTTATACAATGCACGATAGCTAAGACC	0	0	0	0	0	0	0	0	0	0	0	0	0	0	0	0	0	0	0	0	0	0	0	0	0	0	0	0	0	0	0	0	0	0	0	0	0	0	0	0
OTU_750	Chordata	Actinopteri	Gobiiformes	Gobiidae	Neogobius	Neogobius melanostomus	97.531	Midori2	GCTTATACGAGAGGCCCAATTGACAAAAATCGGCGAAAAGCGTGGTTAGTGATATCACCTCCACTAAAGCCAAACACCTTCAAGCCTGTAATACGCCCCCGAAGACAGGAAGCCCAATCACGAAAGTAGCTTTAATTTTCATGAAGCCACGAAAGCTGAGAAA	0	0	0	0	0	0	0	0	0	1	0	0	0	0	0	0	1	1	1	0	0	0	0	0	0	0	0	0	0	0	0	0	0	0	0	0	1	0	0	0
OTU_751	Chordata	Actinopteri	Gobiiformes	Gobiidae	Neogobius	Neogobius melanostomus	97.561	Midori2	GCGGTTATACGAGAGGCCCAAGTTGACAAAAATCGGCGAAAAGCGTGGTTTGATATCACCTCCACTAAAGCCAAACACCTTCAAGGCTGTAATACGCCCCCGAAGACAGGAAGCCCAATCACGAAAGTAGCTTCAATTTTCATGAAGCCACGAAAGCTACGATA	3	2	1	3	6	8	3	5	2	3	2	14	2	3	0	6	8	3	1	8	3	4	5	2	2	7	4	7	5	3	3	4	1	7	3	3	1	2	0	1
OTU_752	Chordata	Actinopteri	Perciformes	Percidae	Perca		96.951	Midori2	GCGGTTATACGAGAGGCCCAAGTTGATAGACATCTGCGTAAAGCGTGGTTAAGATTTAAGACAATACTAAAGCCGAACACCTTCAGAGCTGTTATACGCACCCGAAGGTAAGAAGTTCAACCACGAAAGTGGCTTTATAGCCCCTGAAGCCACGAAAGCTAGGAAA	0	0	0	0	1	0	1	0	0	0	0	2	0	0	1	0	1	4	0	0	0	0	0	0	0	0	1	0	0	0	0	1	0	1	1	1	0	0	0	0
OTU_753	Chordata	Actinopteri	Cypriniformes	Leuciscidae	Rutilus	Rutilus rutilus	97.619	Midori2	GCGTTATACGAGAGGCCCAAGTTGATAATACACGGCGTAAAGGGTGGTTAAGGGAAGCACAATAATAAAGCCAAATGGCCCTTTGGCTGTCATACGCTTCTGGGTGTCCGAAGCCCAATATACGAAAGTAGCTTTAATAAAGCCCACCTGACCCCACGAAAGCTGAGAAA	15	8	2	6	1	3	9	8	6	18	15	12	20	10	6	16	15	20	8	7	2	3	5	4	13	10	3	7	6	1	7	6	13	11	4	9	11	6	0	0
OTU_754	Chordata	Actinopteri	Perciformes	Percidae	Sander		96.97	Midori2	GCGGTTGTACGAGAGGCCCAAGTTGATAGACATCGGCGTAAAGCGTGGTTAATACAAAAACAAAACTAAAGCCGAACACCTTCAGAGCTGTTATACGCACCCGAAGGTAAGAAGTTCAACCACGAAAGTGGCTTTATAGCCCCTGAACCCACGAAAGCTGCGATA	1	2	1	0	0	0	0	0	0	0	1	1	0	0	0	0	1	0	0	1	0	0	0	0	1	3	0	0	0	0	0	1	0	0	0	0	0	0	0	0
OTU_755	Chordata	Actinopteri	Cypriniformes	Leuciscidae	Squalius	Squalius cephalus	97.076	Midori2	GCGGTTAAACGAGAGGCCCTAGTTAATAATACACGGCGTAAAGGGTGGTTAAGGAAAACATAACAATAAAGCCGAATGGCCCTTTGGCTGTCATACGCTTCTAGGTGTCCGAAGCTCAATATACGAAAGTGGCTTTAACAAAGTCCACCTGACGCCACGAAAGCTGAGAAA	15	21	4	8	14	26	13	5	6	18	13	31	13	57	4	6	9	33	10	7	13	0	13	22	6	6	13	28	14	13	6	11	12	6	14	7	16	9	0	0
OTU_756	Chordata	Mammalia	Rodentia	Cricetidae	Microtus		96.951	Midori2	GCTGTCATACGATTAACCCAAACTAATTATTCTCCGCGTAAAACGTGTTACTAAAAATATGCAAAATAGGATTAAAATCCATCCAATATGTAAAAATTCATCGCTGGACCTAAAACCAATGACGAAAGTAATTCTAATAAGCCTGATACACGATAGCTAAGGTA	0	0	0	0	0	0	0	0	0	0	0	0	0	0	0	0	0	0	0	0	0	0	0	0	0	0	0	0	0	1	0	0	0	0	0	0	0	0	0	0
OTU_757	Chordata	Actinopteri	Cypriniformes	Leuciscidae	Leuciscus	Leuciscus leuciscus	97.661	Midori2	GCGGTCATACGAGAGGCCCTAGTTAATAATACACGGCGTAAAGGGTGGTTAAGAAAAGCACAATAATAAAGCCAAATGGCCCTTTGGCTGTCATACGCTTCTAGGTGTCCGAAGCCCAATATACGAAAGTAGCTTTAATAAAGCCCACCTGACCCCATGAAAGCTGAGAAA	4	7	3	0	10	6	6	0	14	18	13	10	7	3	5	14	13	19	3	5	20	4	1	0	11	1	9	1	3	7	8	6	2	12	2	8	11	3	0	0
OTU_758	Chordata	Actinopteri	Perciformes	Percidae	Perca		96.386	Midori2	GCGGTTATACGAGAGGCCCAAGTTGATAGACATCGGCGTAAAGCGTGGTTAAGATTAAAGACAATACTAAAGCCGAACACCTTCAGAGCTGTTATACGCGCCCGGAGGTAAGAAGTTCAACCACGAAAGTGGCTTTATTACCCCTGAACCCACGAAAGCTACGGTA	5	8	0	6	0	0	3	7	2	3	8	7	1	2	1	9	2	12	2	3	1	0	1	0	5	2	3	6	4	6	4	8	7	1	3	5	1	1	0	0
OTU_759	Chordata	Actinopteri	Anguilliformes	Anguillidae	Anguilla		96.407	Midori2	GCCGTTATACGAGGGCTCAAATTGATATTACACGGCGTAAAGCGTGATTaaaaaacaaaaaaaCTAAAGCCAAACACTTCCCAAGCTTTCATACCTACCGGAACATAAACGAAGCCCTATAACGAAAGTAGCTTTAACACCTTTGAACTCACGACAGCTGAGAAA	0	0	0	0	0	0	0	0	0	0	0	0	0	0	0	0	0	0	0	0	0	0	0	0	0	0	0	0	0	0	0	0	0	0	0	0	0	0	0	0
OTU_760	Chordata	Actinopteri	Perciformes	Percidae	Perca	Perca fluviatilis	97.484	Midori2	GCGGTTATACGAGAGGCCCAAGTTGATAGACATCGGCGTAAAGCGTGGTTAAGATTAAAGACAATACTAAAGCCGAACACCTTCAGAGCTGTTATACGCATCCGAAGGTAAGAAGTTCAACCACGAAAGTGGCTTTATCTAACCTGAACCCACGAAAGCCAGCA	66	74	83	83	57	56	37	45	26	50	42	25	128	81	147	95	52	67	87	80	0	58	138	67	41	18	132	78	80	69	49	26	125	78	111	77	116	168	0	0
OTU_761	Chordata	Actinopteri	Perciformes	Percidae	Sander	Sander lucioperca	98.16	manual check	TTGGTTATACGAGAGGCCCAAGTTGATAGACATCGGCGTAAAGCGTGGTTGAGACAAAAACAAAACTAAAGCCGAACACCTTCAGAGCTGTTATACGCACCCGAAGGTAAGAAGTTCAACCACGAAAGTGGCTTTATAGCCCCTGAACCCACGAAAGCTACGATA	6	51	2	6	0	1	9	6	6	3	2	1	5	3	5	9	11	18	6	5	1	0	4	0	6	2	11	7	5	1	5	5	15	3	2	8	6	3	0	0
OTU_762	Chordata	Actinopteri	Cypriniformes	Leuciscidae	Leuciscus		96.491	Midori2	GCGGTTAAACGAGAGGCCCCAGTTAATAATACACGGCGTAAAGGGTGGTTAAGGAAAGCATAACAATAAAGCCGAATGGCCCTTTGGCTGTCATACGCTTCTAGGTGTCCGAAGCCCAATATACGAAAGTAGCTTTAATAAACCCTGACCCCACGAAAGCTGAGAAA	37	41	22	33	16	21	21	24	11	72	35	51	40	75	17	35	25	43	37	49	33	6	12	12	8	28	76	34	34	12	49	40	135	45	40	23	18	36	0	0
OTU_763	Chordata	Actinopteri	Gobiiformes	Gobiidae	Neogobius	Neogobius melanostomus	97.561	Midori2	GCGGTTATACGAGAGGCCCAAGTTGACAAAAATCGGCGAAAAGCGTGGTTAGTGATATCACCTCCACTAAAGCCAAACACCTTCAAGGCTGTAATACGCCCCCGAAGACAGGAAGCCCAATCACGAAAGTAGCTTAATTTTCATGAAGCCAAAAGCTACGATA	5	4	0	1	0	2	0	4	3	0	1	0	0	0	4	4	2	2	0	0	0	1	2	2	1	1	1	2	0	1	1	1	2	2	3	2	1	0	0	0
OTU_764	Chordata	Actinopteri	Cypriniformes	Leuciscidae	Leuciscus	Leuciscus leuciscus	97.076	Midori2	GCGGTTAAACGAGACACCCCAGTTAATAATACGGCGTAAAGGGTGGTTAAGGAGAGCATAACAATAAAGCCGAATGGCCCTTTGGCTGTCATACGCTTCTAGGTGTCCGAAGCCCAATATACGAAAGTAGCTTTAATAAAGCCCACCTGACCCCACGAAAGCTGAGAAA	2	3	7	18	2	2	3	0	3	2	2	0	6	6	14	14	4	3	4	1	4	5	3	2	0	3	1	6	2	0	9	4	6	9	0	1	1	2	0	0
OTU_765	Chordata	Actinopteri	Cypriniformes	Leuciscidae	Abramis		96.512	Midori2	GCGGTTAAACGAGAGGCCCCAGTTAATAATACACGGCGTAAAGGGTGGTTAAGGAAAGTATTAACAATAAAGCCGAATGACCCTTTGGCTGTCATACGCCTCTAGGTGTCCGAAGCTCAATATATGAAAGTAGCTTTAATAAAGCCCACCTGACCCCACGAAAGCTGAGAAA	0	0	0	0	2	1	0	2	2	0	0	0	0	1	0	2	0	0	1	1	3	0	1	0	1	0	0	1	1	0	1	0	0	0	0	0	0	0	0	0
OTU_766	Chordata	Actinopteri	Cypriniformes				95.858	Midori2	GCGGTTAGACGAGAGGCCCTAGTTGATATACAACGGCGTAAGGGGTGGTTAAGGATAAACAGAAATAAAGTCAAATGGCCCCCCGTCATACGCTTCTAGGAGTCCGAAGCCCTAATACGAAAGTAACTTTAATAAACCCACCTGACCCCACGAAAGCTGAGAAA	0	0	0	0	0	0	0	0	0	0	0	0	0	0	0	0	0	0	0	0	0	0	0	0	0	0	0	0	0	0	0	0	0	0	0	0	0	0	0	0
OTU_767	Chordata	Actinopteri	Cypriniformes	Leuciscidae	Abramis		96.512	Midori2	GCGGTTAAACGAGAGGCCCCAGTTAATAATACAGCGTAAAGGGTGGTTAAGAAATTATTAACAATAAAGCCGAATGGCCCTTTGGCTGTCATACGCTTCTAGGTGTCCGAAGTTCAACATACGAAAGTAGCTTTAATAACGCCCACCTGACCCCACGAAAGCTAGGAAA	0	0	0	0	0	0	0	0	0	0	0	0	0	0	0	0	0	0	0	0	0	0	0	0	0	0	0	0	0	0	0	0	0	0	0	0	0	0	0	0
OTU_768	Chordata	Actinopteri	Gobiiformes	Gobiidae	Neogobius		96.988	Midori2	GCGGTTAAACGAGAGGCCCTAGTTGACAAAAATCGGCGAAAAGCGTGGTTAGTGATATCACCTCCACTAAAGCCAAACCTTCAAGGCTGTAATACGCCCCCGAAGACAGGAAGCCCAATCACGAAAGTAGCTTTAATTTTCATGAAGCCACAAAAGCTAGGAAA	184	247	141	149	143	113	174	163	178	302	265	214	366	340	281	368	238	281	149	252	52	115	90	114	123	144	173	185	110	88	310	208	327	301	144	161	176	134	0	1
OTU_769	Chordata	Actinopteri	Gobiiformes	Gobiidae	Neogobius	Neogobius melanostomus	97.561	Midori2	GCGGTTAAACGAGAGGCCCCAGTTGACAAGAATCGGCGAAAAGCGTGGTTAGTGATATCACCTCCACTAAAGCCAAACACCTTCAAGGCTGTAATACGCCCCCGAAGACAGGAAGCCCAATCACGAAAGTAGCTTTAATTTTCATGAAGCCACGAAAGCTACGATA	272	323	457	424	718	572	408	671	509	541	518	300	497	476	680	779	578	430	551	717	341	324	395	607	557	458	930	658	415	350	1196	712	942	929	405	588	466	767	0	21
OTU_770	No Match	No Match	No Match	No Match	No Match	No Match	No Match	Midori2	ACAGATAGCCAGGGTTGAGGCTATAGGCGCCAGCTCCCCACACGATTCCGAGCAGGGTATGCCAGCGATGGCGCTGTAGCGCGTCGCGCCATGTCGTTTCACAGTCGGTGCGTGAAGGGGAACGCCAATGGAGAGTGACCCCACATAGAGCACCCGCCA	0	0	0	0	0	19	0	0	0	0	0	0	0	0	0	0	0	0	0	0	0	0	0	0	0	0	0	0	0	0	0	0	0	2	0	0	0	0	0	0
OTU_771	No Match	No Match	No Match	No Match	No Match	No Match	No Match	Midori2	CAGCAATATCCCCCGCCCCCCTGCTTCAATTTTGGCCAAATAGTGTGCACCCGCATGGATCGCAAGCTTGCCTGCAATTTCACTCATGGGCCTAAGGAGGGGGAGCCCACCCGCATTGTTCGTGACCGTTTCATAGGCAAGCGCAATGCAGCCAGAATTTATCAGATTTTCTGT	0	1	12	0	0	0	0	0	0	0	0	0	0	0	0	0	0	0	0	0	0	0	0	0	0	0	0	0	0	0	0	0	0	0	0	0	0	0	0	0
OTU_772	No Match	No Match	No Match	No Match	No Match	No Match	No Match	Midori2	CATGGGAATGTGTTTGTGGAGGTGAATTTGGAGATTGGGCAATCCTTGAAAATCTTTTTTAAGCAATTTTTCTGCCTTCAGGATCAAGTTGTCCTTGGGGTCTCCAGGCACCTCCAGCCCAGTGACATTCCATGATGGCTTCTTGTCCAAAATCATCTCCAAGGCATCA	0	0	0	0	0	1	0	0	1	0	0	0	0	0	0	0	4	0	0	0	0	0	2	0	0	0	0	0	0	0	0	0	0	0	15	0	0	0	0	0
OTU_773	No Match	No Match	No Match	No Match	No Match	No Match	No Match	Midori2	CCGGGGAATGGATTTATTCTACTTCAAAATATCCAGGCTGTATGACCAATAAATTCAAAAGGAAAATGCAACTTTGTAATAGCCAAAACCTATAAGTTATGCGCCTGCTCCTTTTATCCCTCATTGGCTTCTTTCTTTTTATCAATACCAGTAATGCACAATT	0	0	0	0	0	0	0	0	0	0	0	0	0	0	0	0	0	0	0	18	0	0	0	0	0	0	0	0	0	0	0	0	0	0	0	0	0	0	0	0
OTU_774	No Match	No Match	No Match	No Match	No Match	No Match	No Match	Midori2	ACCAACCCCATCTGCGCCAGCACGGTGTCCTTGTGGGAGATGATACTGTCTGGGCCGTTGAGTGGCAGCACGCCCAGCGAGAGCAGCGAGATCATCGGGTTGAAGATGAACACGCTCCACCACATATTCTTGAGCGTCTTGGGGAACACGCCGTCGGCCTGCTCTTCGA	0	0	0	0	0	0	0	0	0	0	0	0	0	0	0	0	0	0	0	0	15	0	0	0	0	0	0	0	0	0	0	0	0	0	0	0	0	0	0	0
OTU_775	Bacillariophyta	Bacillariophyceae	Naviculales				88.028	Midori2	GGCTTCGGGTGCAGACAATTCAGGTGACTTGACGGGCGGTGTGTACAAACCCCGGGAACGTATTCACCGCAGTATAGCTGACCTGCGATTACTAGCGATTCCACCTTCATGTAGGCGAGTTGCAGCCTACAATCTGAACTAAGGATATGTTTAGAGATTAGCTCGTTTTCG	0	0	0	0	0	0	0	0	0	0	0	0	0	0	0	0	0	0	0	0	0	0	0	0	0	0	0	0	0	0	0	0	0	0	0	0	0	0	0	0
OTU_776	Chordata	Mammalia	Rodentia				85.093	Midori2	ACTGTCATATGATTAACCCTAATTAATAAACGCCGGTTTAAAGAGTGTCAAAAATATAACAAGAATAAGATTAAATTTTATCTAGGTCGTAAAAAACAGTAGATAAATACAAAATAATTAACGAAAGTAATCTTAATCTGTCTGAACACTCTAAAGCTGAAACC	0	14	0	0	0	0	0	0	0	0	0	0	0	0	0	0	0	0	0	0	0	0	0	0	0	0	0	0	0	0	0	0	0	0	0	0	0	0	0	0
OTU_777	No Match	No Match	No Match	No Match	No Match	No Match	No Match	Midori2	GCTCAAACAGGCCGCTGTAACCCACCCCCATGATGAGCAAAGCGCTCACGATAAAAGCCCCCGTGGCTTCCGGCAAGGTCACGCCCTGCGTCACCGCCAACACCGCCGCACCGGGCGTTGACCATGCCGTCAACACCGGCTGCCGGTACCACAGGCTCAAGAC	0	0	0	0	0	0	0	0	0	0	0	0	0	0	0	13	0	0	0	0	0	0	0	0	0	0	0	0	0	0	0	0	0	0	0	0	0	0	0	0
OTU_778	No Match	No Match	No Match	No Match	No Match	No Match	No Match	Midori2	AAACACTACGACGAAGTGGCCCAAAAGGGCATGCAGGCCTTGAAAAACCTGAACAAACCGACCCTGGCCATGATTCAGGGTTATTGCATCGGTGGTGGTGTGGCCGTGGCGCTCAATTGCGACATCCGCATCGCAGCCGACAACGCCAGATTTGCCGTGCCCGCCGC	0	0	15	0	0	0	0	0	0	0	0	0	0	0	0	0	0	0	0	0	0	0	0	0	0	0	0	0	0	0	0	0	0	0	0	0	0	0	0	0
OTU_779	No Match	No Match	No Match	No Match	No Match	No Match	No Match	Midori2	GCTCAAACAAGCCGCTGTAGCCCACGCCCATGATGAGCAACGCACTCACGATGAAGGCCCCCGTCGCCTCCGGCAGGGTCACGCCCTGCGTCACCGCCAACACCGCCGCACCGGGCGTTGACCAGGCCGTCAACACCGGCTGCCGGTACCAAAGGCTCAAGAC	0	0	0	0	0	0	0	0	0	0	0	12	0	0	0	0	0	0	0	0	0	0	0	0	0	0	0	0	0	0	0	0	0	0	0	0	0	0	0	0
OTU_780	Chordata	Actinopteri	Gobiiformes	Gobiidae	Neogobius		96.386	Midori2	GCGGTTATACGAGAGGCCCAAGTGACAAAAATCGGCGAAAAGCGTGGTTAGTGATATCACCTCCACTAAAGCCAAACACCTTTAAGGCTGTTATACGCCCCCAAAGGTAGGAAGCCCAATCACGAAAGTAGCTTTAATTTTCATGAAGCCACGAAAGCTAGGAAA	0	1	0	0	0	0	0	0	0	0	0	0	0	2	0	1	0	0	0	2	0	0	1	0	0	0	0	1	0	0	1	0	0	0	0	0	0	0	0	0
OTU_781	Chordata	Actinopteri	Perciformes	Percidae	Sander	Sander lucioperca	100	manual check	GCGGTTATACGAGAGGCCCAAGTTGATAGACATCGGCGTAAAGCGTGGTTAAGACAAAAACAAAACTAAAGCCGAACACCTTCAGAGCTGTTATACGCACCCGAAGGTAAGAAGTTCAACCACGAAAGTGGCTTTATTACCCCTGAACCCACGAAAGCCAGGGCC	41	95	27	86	48	22	34	53	69	36	62	48	16	6	19	72	63	94	62	38	71	0	8	8	37	22	64	112	46	69	47	29	68	16	44	55	51	28	0	0
OTU_782	Chordata	Actinopteri	Gobiiformes	Gobiidae	Neogobius		96.988	Midori2	GCGGTTATACGAGATGCCCAATTGACAAAAATCGGCGAAAAGCGTGGTTAGTGATATCACCTCCACTAAAGCCAAACACCTTCAAGGCTGTAATACGCCTCCGAAGACAGGAAGCCCAATCACGAAATAGCTTTAATTTTCATAAGCCACGAAAGCTAGGAAA	0	0	0	0	0	0	0	0	0	0	0	0	0	0	0	0	0	0	0	0	0	0	0	0	0	0	0	0	0	0	0	0	0	0	0	0	0	0	0	0
OTU_783	No Match	No Match	No Match	No Match	No Match	No Match	No Match	Midori2	GAAGAAACCAACGTCGCCTACACAGAAAATGAGCTGATCGAATACACCATCACCAGCAAAGGCGGTCCAATCAAAAACCATTATGGCAGCATGAAATTCTTTGATCTCGGCGCACGCAGCCGCTTGGAATACACCATCACCTTTAAAGGCCGTGTGCCTGTCGTCGGCTTGATCAT	0	0	5	0	0	0	0	0	0	6	0	0	0	0	0	0	0	0	0	0	0	0	0	0	0	0	0	0	0	0	0	0	0	0	0	0	0	0	0	0
OTU_784	No Match	No Match	No Match	No Match	No Match	No Match	No Match	Midori2	CTGTCAGAATCAGATCAGCAACGATGGCCTCGCGGTCGACATCCGTCACTTGCCATCTATGCTGTGATCGCTGTGCCTTTGCTTCTATAATCATGGGAAGGTCCACGACCGCCATGCGTTTGGCGCGGTCAATGCGGTCGACAGCATCTACAACATCGACTACCG	0	0	0	0	0	0	0	0	0	0	0	11	0	0	0	0	0	0	0	0	0	0	0	0	0	0	0	0	0	0	0	0	0	0	0	0	0	0	0	0
OTU_785	No Match	No Match	No Match	No Match	No Match	No Match	No Match	Midori2	ATGACAAAAAAGTGTCTTTGAATTCCACTGTGACAAGATCCCAATCATATTAGTCGTGTTTTATAACTAAATATTATGAGGCTATTTTGGAAAAGTCAGAGGATGCGGGTGACATTATTTTGGGAGGTAATGTTGGCAGAACCTGATGCTGTAACAACCAACAGCCAC	0	0	0	0	0	0	0	0	0	0	0	0	0	10	0	0	0	1	0	0	0	0	0	0	0	0	0	0	0	0	0	0	0	0	0	0	0	0	0	0
OTU_786	No Match	No Match	No Match	No Match	No Match	No Match	No Match	Midori2	TTTCGACCATGCATGAAAGCAAGCAAACGTCTTCCTGCAGTTGGCCTTTTAGGCATGCACTGATGTGCGTACCAACAGGACACGTGCACTCGTATTGCCGACCTGGCGAGACACATGCAAGACACAAGTTTCCAGCAGAAGGCGCAGTGTTTGGACC	0	0	0	0	0	0	0	0	0	0	0	0	0	0	11	0	0	0	0	0	0	0	0	0	0	0	0	0	0	0	0	0	0	0	0	0	0	0	0	0
OTU_787	No Match	No Match	No Match	No Match	No Match	No Match	No Match	Midori2	GCACCTGAATGCCCGCATGGGCCTGACACGCACCTTCCAGATCGTGCAGCCTTTTGCCGCACAAACGGTGCGCGAAAACATCGCGGTGGGGGCGCACCTGCATTTACCGAGCCGCGCCCAGGCGCTGGCGTTTGCCGAATCGGTGGCAAGCCAAGTGGGCTTGACGCCCCAGCTGGA	0	0	0	0	9	0	0	0	0	0	0	0	0	0	0	0	0	0	0	0	0	0	0	0	0	0	0	0	0	0	0	0	0	0	0	0	0	0	0	0
OTU_788	No Match	No Match	No Match	No Match	No Match	No Match	No Match	Midori2	TTCGGCAGCCCAGAACTTCGCCGACAACAACGCTTCATCGGCGGGGAGTCCTTCGCTTAAACGCCAGGCTGCTTGCCATGCTGTTAAGCGAACACCCTCGGTGTCGATGTATGCGTCGCCGGCACGTTGGCTCACAGCCTGGAAAGTCGCGATGGCCTTTT	0	0	0	0	0	0	0	0	0	0	0	0	0	0	0	0	0	0	0	0	0	0	0	0	0	0	0	11	0	0	0	0	0	0	0	0	0	0	0	0
OTU_789	No Match	No Match	No Match	No Match	No Match	No Match	No Match	Midori2	CTAGAGTTTCTGCAGAGATTTTGGTAAATGTAGTTGAAAGGAAGTTGCGTATTGCATCTAGGTTCATGTTCGTTCTCCATAAAAAATATGACGGCCAATTTTTTCAATTTTAGGCAGTTTCCATCCGGGGTTTACATATTCCGCATGATAGTAAAGTGCTTTGTG	0	0	0	0	0	0	0	0	0	0	0	0	0	0	0	0	0	0	0	0	0	0	0	0	0	0	11	0	0	0	0	0	0	0	0	0	0	0	0	0
OTU_790	No Match	No Match	No Match	No Match	No Match	No Match	No Match	Midori2	ATCTCTGCGTGAGCAATGGTGTCGCGTGCACCTCCGTGAACCTGGGGTGAGCAGCGCAGTGAATACGCATCCTGAACGCGGCCATCTTCAGGCCCAGAATGTGACTTCACAATCGGGGAGTCAGCCAAGATGTTCCGCAAGTTAGTAGCGGATTGACCCTGTC	0	0	0	0	0	0	0	0	0	0	0	0	1	3	0	0	0	1	3	0	0	0	0	0	0	0	0	0	0	0	0	0	0	0	0	0	0	10	0	0
OTU_791	No Match	No Match	No Match	No Match	No Match	No Match	No Match	Midori2	TCAATCTCAGCTTGAAGTCTAGAACAACAACAGGATGACCCCAGTCAACAAGAGCAAGGAGAACAACATTCTCAGACTCCCCTCCATCAATGACAAGCCAGTTTTACAGAGACAAGCTTCGGCCATCCTCGGGGGTGTCATTCAATCCAAGTACAGCAGACCAGACAG	0	0	0	0	0	0	0	0	0	0	0	0	0	0	0	0	0	0	0	0	0	0	0	0	0	0	0	0	0	0	12	0	0	0	0	0	0	0	0	0
OTU_792	Chordata	Actinopteri	Perciformes	Gasterosteidae	Gasterosteus		95.758	Midori2	GCGGTTATACGAGAGGCCCAAGTTGATGAATTACGGCGTAAAGAGTGGTTAAGCTAAAATTAAAACTAAAGCCGAACACCCCCTGTTATACGCATCCGGAGGTGAGAAGTTCAACCACGAAGGTGGCTTTATCTAACCTGAACCCAAAAGCTACGGCA	0	0	0	0	0	0	0	0	0	0	0	0	0	0	0	0	0	0	0	0	0	0	0	0	0	0	0	0	0	0	0	0	0	0	0	0	0	0	0	0
OTU_793	Chordata	Actinopteri	Gobiiformes	Gobiidae	Neogobius	Neogobius melanostomus	97.561	Midori2	GCGGTTATACGGGAGGCCCAAGTTGACAAAAATCGGCCAAAAGCGTGGTTAGTGATATCACCTCCACTAAAGCCAAACACCTTCAAGGCTGTAATACCCCCCGAAGACAGGAAGCCCAATCACGAAAGTAGCTTTAATTTTCATGAAGCCACGAAAGCTACGATA	2	2	0	0	1	0	2	0	0	0	1	2	1	1	1	1	0	1	1	0	2	0	1	0	4	0	1	0	0	0	0	1	0	0	4	1	2	1	0	0
OTU_794	Chordata	Actinopteri	Perciformes	Gasterosteidae			96.951	Midori2	TCGGTTATACGAGAGGCCCAAGTTGATGAACATCGGCGTAAAGAGTGGTTAAGCTAAAATTAAAACTAAAGCCGAACGTCCCCAAAGCTGTTATACGCATCCGGAGGTGAGAAGTTCAACCACGAAGGTGGCTTTATCTAACCTGAACCCACGAAAGCTACGGCA	0	8	0	0	0	0	0	0	0	0	0	0	1	0	0	0	0	0	0	0	0	0	0	0	14	3	0	9	0	18	0	0	1	0	0	14	0	0	0	0
OTU_795	Chordata	Actinopteri	Cypriniformes	Leuciscidae			94.737	Midori2	GCGGTTAAACGAGAGGCCCTAGTTAATAATACACGGCGTAAAGGGTGGTTAAGGGAAGCACAATAATAAAGCCAAATGGCCCTTTGGCTGTCATACGCTTCTAGGTGTCCGAAGTTCAACATACGAAAGTAGCTTTAATAACACCCACCCCACGAAAGCTGAGAAA	0	0	0	0	0	0	0	0	0	0	0	0	0	0	1	0	1	0	0	0	0	0	0	0	0	0	0	0	0	0	0	1	0	0	0	0	0	0	0	0
OTU_796	Chordata	Actinopteri	Perciformes	Percidae	Perca	Perca fluviatilis	98.16	Midori2	CCGGTTATACGAGAGGCTCAAGTTGATAGACATCGGCGTAAAGCGTGGTTAAGATTAAAGACAATACTAAAGCCGAACACCTTCAGAGCTGTTATACGCATCCGAAGGTAAGAAGTTCAACCACGAAGGTGGCTTTATAGCCCCTGAACCCACGAAAGCTAGGAAA	20	6	2	9	1	6	3	3	5	8	8	4	6	3	6	6	12	5	4	2	0	6	3	2	8	4	5	7	4	5	1	8	9	4	8	5	2	5	0	0
OTU_797	Chordata	Actinopteri	Gobiiformes	Gobiidae	Ponticola		96.319	Midori2	CCGGTTATACGAGAGGCCCGAGTTGACAAACATTCGGCGTAAAGCGTGGTTAGTAACTTATTTACTAAAGCCAAACACCTTTAAGGCTGTTATACGCCCCCAAAGGTAGGAAGACCCCTCACGAAAGTAGCCTTAATTTTCATGAAGCCACGAAAGCTAGGAAA	28	37	57	112	2	13	19	22	22	71	42	34	37	49	29	61	29	86	101	36	41	0	57	64	30	30	38	9	13	16	59	19	47	46	43	69	31	34	0	0
OTU_798	Chordata	Actinopteri	Cypriniformes	Leuciscidae	Abramis	Abramis brama	98.795	Midori2	GCGGTTAAACGAGAGGCCCCAGTTAATAATACACGGCGTAAAGGGTGGTTAAGGAAAGTATTAACAATAAAGCCGAATGGCTCTTTGGCTGTCATACGCTTCTAGGTGTCCGAAGTTCAACATACGAAAGTAGCTTTAATAACGCCCACCTGACCCCACGACAGCTATGGTA	6	3	4	2	1	4	5	3	0	1	5	10	4	1	0	4	5	8	3	3	13	2	3	12	0	4	6	2	2	1	16	7	4	5	9	3	1	12	0	0
OTU_799	Chordata	Actinopteri	Gobiiformes	Gobiidae	Neogobius		95.783	Midori2	GCGGTTATACGAGAGGCCCAAGTTGGCAAAATCGAAAAGCGTGGTTAGTGATATCACCTCCACTAAAGCCAAACACCTTCAAGGCTGTAATACGCCCCCGAAGACAGTAAGCCCAATCACGAAAGTAGCTTTAATTTTCATGAAGCCACGAAAGCTAGGAAA	0	0	0	0	0	0	0	0	0	0	0	0	0	0	1	0	0	0	0	0	0	0	0	0	0	0	0	0	0	0	0	0	0	0	0	0	0	0	0	1
OTU_800	Chordata	Actinopteri	Cypriniformes	Cyprinidae	Barbus		95.714	Midori2	GCGGTTAAACGAGAGGCCCCAGTTAATAATACACGGCGTAAAGGGTGGTTAGGGATAAATAATAATAAAGCCAAATGGCCCCTTGGCCGTCATACGCTTCTAGGTGTCCGAGGCCCTATATACGAAAGTAGCTTTAATTTTCATGAAGCCACGAAAGCTAGGAAA	0	0	0	0	0	0	0	0	0	0	2	0	0	0	0	0	0	0	0	0	0	0	0	0	0	0	0	0	0	0	0	0	0	0	0	0	0	0	0	0
OTU_801	Chordata	Actinopteri	Cypriniformes	Leuciscidae			94.545	Midori2	GCGGTTAAACGAGAGGCCCTAGTTAATAATACACGGCGTAAAGGGTGGTTAAGGAAAGCATAACAATAAAGCCGAATGGCCCTTTGGCTGTCATACGCTTCTAGGTGTCCGAAGCCCAATATACGAAAGTAGCTTTATCTAACCTGAACCCACGAAAGCTACGGCA	0	0	2	0	0	0	1	0	0	2	0	0	0	0	0	3	0	0	1	2	0	1	0	0	0	0	0	0	0	0	0	0	0	3	0	1	2	2	0	0
OTU_802	No Match	No Match	No Match	No Match	No Match	No Match	No Match	Midori2	CAGTCTGCCCAAATTGATTTCTGGGATTTCTTTGCCTGAAAGTGTATCAACTACAGTGTACTGCTAAATGTGAGGATTAGCAATACATTTGTACACTGGATTTCAAGACGCATTTTAAGTTAGTAGTGTTTTTGGGGATCAGAACGGGGACATCACATCAG	0	0	0	0	0	0	0	0	0	0	0	0	0	0	0	0	0	0	0	0	0	0	0	0	0	0	0	0	10	0	0	0	0	0	0	0	0	0	0	0
OTU_803	Chordata	Actinopteri	Perciformes	Percidae			93.865	Midori2	GCGGTTATACGAGAGGCCCAAGTTGATGAATTACGGCGTAAAGAGTGGTTAAGATTAAAGACAATACTAAAGCCGAACACCTTCAGAGCTGTTATACGCATCCGAAGGTAAGAAGTTCAACCACGAAAGTGGCTTTATCTAACCTGAACCCACGAAAGCTACGGCA	0	0	0	0	0	0	0	0	0	0	0	0	0	0	1	0	0	0	0	0	0	0	0	1	0	0	1	0	0	0	0	0	0	0	0	0	0	0	1	0
OTU_804	No Match	No Match	No Match	No Match	No Match	No Match	No Match	Midori2	GACGGCGACTTCCTGGTCGACGGAGTCAAGTGGTGGATCAGCCACGGGGGAGTGGCCGACTACTACGTCGCAATGGTTCGCACATCCGACGATGGCGCCAAGGGCATTTCCTGCCTCCTCATCGACGCTGACGCCCCCGGGCTGTCGGCGAGAACCCCCGAGCG	0	5	1	0	0	0	0	2	0	0	1	0	1	0	0	2	3	2	0	0	8	2	0	0	0	0	7	0	0	0	1	0	0	0	0	0	0	0	0	0
OTU_805	Chordata	Actinopteri	Perciformes	Percidae	Sander		96.364	Midori2	GCGGTTATACGAAAGACCCTAGTTAATAGCCACGGCGTAAAGCGTGGTTAAGACAAAAACAAAACTAAAGCCGAACACCTTCAGAGCTGTTATACGCACCCGAAGGTAAGAAGTTCAACCACGAAAGTGGCTTTATTACCCCTGAACCCACGAAAGCTACGATA	0	0	0	0	0	0	2	0	1	0	0	1	0	0	0	0	0	2	0	0	0	0	0	0	1	0	1	0	2	0	0	1	0	0	0	0	3	0	0	0
OTU_806	No Match	No Match	No Match	No Match	No Match	No Match	No Match	Midori2	CAAGAACAAGACCACGCACAAGGTGGACACCAAAATCATGTTGGCGTATTCGCCCAAGAAGAACATGGCAAAGGACATGCCCGAATACTCGATCATGTGACCCGCCACGATTTCGGACTCGCCCTCCACCACGTCAAAAGGATGGCGATTGGTTTCGGC	0	0	0	0	4	0	0	0	0	0	0	0	0	0	0	0	0	0	0	2	0	0	9	0	0	0	0	0	0	0	0	0	0	0	0	0	0	0	0	0
OTU_807	No Match	No Match	No Match	No Match	No Match	No Match	No Match	Midori2	GCCTCGACGATGGTTGAGGCATGGCACTGCGGAAATGGCGCGGAGTCGTAAATGAACCGCGCGCCAACGAAGCCCGGCTGTTCCGTGAACGCGGCGCCGCGGGCCGCAGGAAGTGCGAGCAGCAGCGCCAGCGTGAGCCATCCGCATGTTGGTGAGAGGA	0	0	0	0	0	0	0	0	0	0	0	0	0	0	0	0	0	0	9	0	0	0	0	0	0	0	0	0	0	0	0	0	0	0	0	0	0	0	0	0
OTU_808	No Match	No Match	No Match	No Match	No Match	No Match	No Match	Midori2	CAAAACGGTCTTGCGTGATTTGTTCTGTTCATGCGGTCATGCGCGAAGCCGGGGCCCCGGACCGAATGTCAGTGGAACCCGGACTCGCCCGAAGTGTCAATTCCCCGCATGTGACTCGTCTCCTGCGACTGAACACTGAACAGACCCTCAGGTATCAGT	0	0	0	0	0	0	0	0	0	0	0	0	0	0	0	0	0	0	0	0	0	0	0	0	0	0	0	0	0	0	0	0	0	9	0	0	0	0	0	0
OTU_809	No Match	No Match	No Match	No Match	No Match	No Match	No Match	Midori2	AGTTTCACCATGCCTCTTGTATCAAGGCCAGCTACGGTAAAGTCAAACGGAGATATGGTCAGCAGTAGTAGAATGGGATCGTCGAATATCCTGATGAAGGGGGAGAAGGAAAGAGGAGAGGCGGAAGACGGGAAGGAACAAATGGCAGGAGTGAAAGCAAAGAGACA	0	0	0	0	0	0	0	0	0	0	0	10	0	0	0	0	0	0	1	0	0	0	0	0	0	0	0	0	0	0	0	0	0	0	0	0	0	0	0	0
OTU_810	No Match	No Match	No Match	No Match	No Match	No Match	No Match	Midori2	TGCGAAGCAAACTGCATAAGGAGCTCGTCCTGAATGCTAACAGCTGCTCGCAGCTTAGGCTGGACCGGATCAATGTACACCCGCATGTGCCATGTGCGCTGCCCCGCCTGCACCTGCACTGTGTCCACCCACTGCCAGCCCCGCATCAGCTGTCGCCAGCGCACCCCTTTC	0	0	0	0	0	0	0	0	0	0	0	0	0	0	0	0	0	0	1	0	0	0	0	0	0	1	0	0	0	0	0	0	0	4	10	0	0	0	0	0
OTU_811	Chordata	Actinopteri	Perciformes	Gasterosteidae			91.975	Midori2	GCGGTTAAACGAGAGGCCCTAGTTAATAATACACGGCGTAAAGGGTGGTTAAGCTAAAATTAAAATTAAAGCCGAACACCCCCAAAGCTGTTATACGCATCCGGAGGTGAGAAGTTCAACCACGAAGGTGGCTTTATAGCCCCTGAACCCACGAAAGCTACGATA	0	0	1	0	0	2	0	1	0	1	4	0	2	0	3	2	1	0	1	4	0	0	2	0	1	0	2	1	0	2	1	4	7	0	0	3	2	0	0	0
OTU_812	Chordata	Mammalia	Rodentia	Myocastoridae	Myocastor	Myocastor coypus	97.561	Midori2	GCGGTCATACGATTAACCCTGATTAATAAACCCCGGCGTAAAGAGTATTAAAGATACAATAAAAATAAGATTAAATTTCATCTGGGTCGTAAAAAACTATAGATAAAAATAAAATCGATACCGAGGGCAATCTTAATATACCAGAATATACTAAAGCTAAGACA	0	17	0	68	9	0	1	0	9	2	0	0	2	10	1	14	11	0	0	0	0	0	22	20	0	0	0	15	0	0	4	0	0	9	0	0	6	0	0	0
OTU_813	Chordata	Actinopteri	Gobiiformes	Gobiidae	Neogobius		96.988	Midori2	GCGGTTATACGAGAGGCCCAAGTTGACAAAAATCGGCGAAAAGCGTGGTTAGTGATATCACCTCCACTAAAGCCAAACACCTTCATCTGTAATACGCTCCCGAAGACAGGAAGCCCAATCACGAAAGTAGCTTTAATTTCCATGAAGCCACGAAAGCTAGGAAA	1	1	0	0	3	3	0	3	1	0	0	1	0	0	2	6	2	2	1	0	1	2	3	1	2	0	2	2	4	1	1	2	2	1	1	1	1	0	0	0
OTU_814	Chordata	Actinopteri	Cypriniformes	Leuciscidae	Leuciscus	Leuciscus leuciscus	97.661	Midori2	GCGGTTAAGCGAGAGGCCCTAGTTAATAATACACGGCGTAAAGGGTGGTTAAGGAAAGCCCAATAATAAAGCCAAATGGCCCTTTGGCTGTCATACGCTTCTAGGTGTCCGAAGCCCAATATACGAAAGTAGCTTCAACAAAGCCCACCTGACCCCACGAAAGCTGAGAAA	74	59	54	19	39	2	3	15	32	25	105	49	22	88	5	23	9	48	7	5	0	3	0	0	32	4	14	0	17	0	27	9	69	66	0	5	60	2	0	0
OTU_815	Chordata	Actinopteri	Cypriniformes	Cyprinidae	Barbus		95.294	Midori2	GCGGTTATACGAGGGGCTCAAATTGATATTACACGGCGTAAAGGGTGGTTAGGGATAAATAATAATAAAGCCAAATGGCCCCTTGGCCGTCATACGCTTCTAGGTGTCCGAGGCCCTATATACGAAAGTAGCTTTAATTAACCCGCCTGACCCCACGAAAACTGAGAAA	0	0	0	2	1	0	6	1	0	0	0	2	2	3	0	5	1	1	0	0	0	1	5	3	1	0	1	3	0	1	0	0	1	0	0	1	2	0	0	0
OTU_816	Chordata	Actinopteri	Cypriniformes	Cyprinidae			92.442	Midori2	GCGGTTATACGAGAGGCCCAAGTTGATAGACATCGGCGTAAAGCGTGGTTAAGGAAAGTATTAACAATAAAGCCAAATGGCCCCTTGGCCGTCATACGCTTCTAGGTGTCCGAGGCCCTATATACGAAAGTAGCTTTAATTAACCCGCCTGACCCCACGAAAACTGAGAAA	0	0	1	3	0	0	0	1	1	0	1	0	4	2	0	0	2	2	0	0	0	0	2	0	1	0	0	1	1	0	0	0	0	2	0	0	1	0	0	0
OTU_817	Chordata	Actinopteri	Cypriniformes	Leuciscidae	Rutilus		96.403	Midori2	GCGGTTAAACGAGAGGCCCTAGTTAATAATACACGGCGTAAAGGGTGGTTAAGGGAAGCACAATAATAAAGCCAAATGGCCCTTTGGCTGTCATATGCTTCTAGGTGTCCGAAGTTCAGCATACGAAAGTAGCTTTAATTTTCATGAAGCCACGAAAGCTAGGAAA	1	0	0	0	0	0	0	1	2	0	0	2	6	1	3	2	0	4	1	2	0	0	0	0	0	5	1	0	0	0	3	2	4	0	0	0	0	1	0	0
OTU_818	Chordata	Actinopteri	Perciformes	Percidae	Perca		96.386	Midori2	GCGGTTATACGAGAGGCCCAAGTTGATAGACATCGGCGTAAAGCGTGGTATATTAAAGACAATACTAAAGCCGAACACCTTCAGAGCTGTTATACGCACCCGAAGGTAAGAAGTTCAACCACGAAAGTGGCTTTATTACCCCTGAACCCACGAAAGCTACGATA	4	20	1	3	0	3	4	6	2	6	2	3	0	1	2	4	8	12	9	4	3	0	0	1	4	0	10	6	0	2	6	5	12	0	6	4	1	1	0	0
OTU_819	Chordata	Actinopteri	Perciformes	Gasterosteidae	Gasterosteus	Gasterosteus aculeatus	100	Midori2	ATGAAGGACGAGAGGCCCAAGTTGATGAATTACGGCGTAAAGAGTGGTTAAGCTAAAATTAAAACTAAAGCCGAACACCCCCAAAGCTGTTATACGCATCCGGAGGTGAGAAGTTCAACCACGAAGGTGGCTTTATCTAACCTGAACCCACGAAAGCTACGGCA	0	0	0	0	2	1	0	0	0	0	0	3	2	0	0	1	0	1	0	2	0	0	1	0	0	1	0	0	1	1	1	1	0	1	1	0	9	10	0	0
OTU_820	Chordata	Mammalia	Primates	Hominidae	Homo		96.407	Midori2	GCGGTCAGACGAGTAACCCAAGTCAATAGAAGGCGGCGTAAAGAGTGTTTTAGATCACCCCCTCCCCAATAAAGCTAAAACTCAGCTGAGTTGGAAAAAACTCCAGTTGACACAAAATAGACTACGAAAGTGGCTTTAACACATCTGCACACACAATAGCTAAGACC	10	4	0	1	0	0	2	0	0	30	4	0	2	12	1	2	4	5	10	7	46	5	25	17	12	20	0	0	5	3	15	2	3	0	3	8	5	4	12	8
OTU_821	Chordata	Actinopteri	Cypriniformes	Leuciscidae	Leuciscus	Leuciscus leuciscus	97.661	Midori2	GCGGTTAAACGAGAGGCCCTAGTTAATAATACACGGCGTAAAGGGTGGTTAGGGAAAGCACAATAATAAAGCCAAATGGCCCTTTGGCTGTCATACGCTTCTAGGTGTCCGAAGCCCAGTATACGAAAGTAGCTTTAATAATGCCCACCTGACCCCACGAAAGTTGAGAAA	10	20	230	9	27	0	0	13	11	6	56	2	7	34	1	5	0	21	6	1	0	1	0	0	33	1	16	0	20	0	26	14	33	32	0	2	10	13	0	0
OTU_822	Chordata	Actinopteri	Gobiiformes	Gobiidae	Neogobius		96.988	Midori2	GCGGTTATACGAGAGGCCCAAGTTGACAAAAATCGGCAAAAAGCGTGGTTAGTATACCACCTCCACTAAAGCCAAACACCTTCAAGGCTGTAATACGCCCCCGAATACATGAAGCCCAATCACGAAAGTAGCTTTAATTTTCATGAAGCCACGAAAGCTAGGAAA	0	0	1	0	0	0	0	0	0	0	0	0	0	0	0	0	0	0	0	0	0	0	0	0	0	0	0	0	0	0	0	0	0	0	0	0	0	0	0	0
OTU_823	Chordata	Actinopteri	Gobiiformes	Gobiidae	Neogobius	Neogobius melanostomus	98.734	Midori2	TCTGTTATACGAGAGGCCCAAGTTGACAAAAATCGGCGAAAAGCGTGGTTAGTTATATCACCTCCACTAAAGCCAAACACCTTCAAGGCTGTAATACGCCCCCGAAGACAGGAACCCCAATCACGAAAGTAGCTTTAATTTTCATGAAGCCACGAAAGCTAAAA	0	0	0	0	0	0	0	0	0	0	0	0	0	0	0	0	0	0	0	0	0	0	0	0	0	0	0	0	0	0	0	0	0	0	0	0	0	0	0	0
OTU_824	Chordata	Actinopteri	Cypriniformes	Tincidae	Tinca		95.376	Midori2	GCGGTTAGACGAGAGGCCCTAGTTGATATTATAACGGCGTAAAGGGTGGTTAGGGATAAATTATAATAAAGCCAAATGGCCCCTTGGCCGTCATACGCTTCTAGGCGCCCGAAGCCCAACCACACGAAAGTAGCTTTAACAAAGCCCACCTGACCCCACGAAAGCTGAGAAA	0	16	0	16	0	0	0	0	0	0	0	7	0	0	9	0	0	0	0	0	0	0	0	31	0	0	5	0	0	0	0	11	2	0	0	0	0	0	0	0
OTU_825	Chordata	Actinopteri	Cypriniformes	Leuciscidae	Rutilus	Rutilus rutilus	97.661	Midori2	GCGGTTAAACGAGAGGCCCTAGTTAATAATACACGGCGTAGAGGGTGGTTAAGGGAAGCACAATAATAAAGCCAAATGGCCCTTTGGCCGTCATACGCTCCTAGGTGTCCGAAGCCCAATGTACGAAAGTAGCTTTAATAAAGCCCACCTGACCCCACGAAAGCTGAGAAA	2	3	40	23	0	0	0	61	0	6	2	3	73	1	0	5	9	28	32	4	0	0	0	0	8	123	26	179	1	34	178	1	4	0	1	1	24	30	0	0
OTU_826	Chordata	Actinopteri	Perciformes	Percidae	Perca	Perca fluviatilis	98.16	Midori2	GCGGTTATACGGGAGGCCCAAGTTGATGGACATCGGCGTAAAGCGTGTTTAAGATTAAAGACAATACTAAAGCCGAACACCTTCAGAGCTGTTATACGCATCCGAAGGTAAGAAGTTCAACCACGAAAGTGGCTTTATAGCCCCTGAACCCACGAAAGCTACGGCA	5	7	6	6	1	0	0	3	1	3	2	3	4	2	3	1	4	6	1	1	0	5	4	3	5	1	2	1	1	8	2	7	9	4	0	1	6	0	0	0
OTU_827	Chordata	Actinopteri	Anguilliformes	Anguillidae	Anguilla		96.407	Midori2	GCGGTTATACGAGGGGCTCAAATTGATATTACGCGGCGTAAAGCGTGATTaaaaaacaaaaaaaCTAAAGCCAAACACTTTCCTCTGTCATACGCTACCGGAACATAAACGAAGCCCTATAACGAAAGTAGCTTTAACACCTTTGAACTCACGACAGTTGAGAAA	0	0	0	2	1	0	6	0	0	0	0	3	0	0	0	0	0	1	5	0	1	0	1	0	1	0	0	0	2	0	0	1	0	0	0	0	0	0	0	0
OTU_828	Chordata	Actinopteri	Cypriniformes	Cyprinidae	Barbus	Barbus barbus	97.561	Midori2	GCGGTTAGACGAGAGGCCCTAGTTGATATTATAACGACGTAAAGGGTGGTTAGGGATAAATAATAATAAAGCCAAATGGCCCCTTGGCCGTCATACGCTTCTAGGTGTCCCATGCCCTATATACGAAAGTAGCTTTAATTGACCCGCCTGACCCCACGAAAGCTACGATA	0	0	0	2	0	1	3	1	0	0	0	0	6	7	2	1	0	1	3	0	0	0	0	0	1	4	2	8	2	0	1	0	2	0	1	0	0	1	0	0
OTU_829	Chordata	Actinopteri	Cypriniformes	Leuciscidae	Abramis	Abramis brama	97.633	Midori2	GCGTTAAACGAGAGGCCCCAGTTAATAATACACGGCGTAAAGGGTGGTTAAGGAAACTATTAACAATAAAGCCGAATGGCCCTTTGGCTGTCATACGCTTCTAGGTGTCCGAAGTTCAACATACGAAAGTAACTTTAATAAACCCACCTGACCCCACGAAAGCTGAGAAA	0	4	4	0	5	2	3	2	1	6	0	5	3	1	6	3	4	0	2	0	1	0	0	3	1	0	1	1	1	2	0	1	4	4	3	0	1	0	0	0
OTU_830	Chordata	Actinopteri	Cypriniformes	Leuciscidae			93.023	Midori2	GCGGTTATACGAGAGGCCCAAGTTGATAGACATCGGCGTAAAGGGTGGTTAAGGAAAACATGATAATAAAGCCGAATGGCCCTTTAGCTGTCATACGCTTCTAGGTATCCGAAGCCCAATATACGAAAGTAGCTTTAATAACGCCCACCTGACCCCACGAAAGCTGAGAAA	0	0	0	0	0	0	0	0	0	0	0	0	0	2	0	0	0	6	0	0	0	0	0	0	0	0	0	0	0	0	0	0	0	0	0	0	0	0	0	0
OTU_831	Chordata	Actinopteri	Cypriniformes	Leuciscidae	Leuciscus		96.512	Midori2	GCGGTTATACGAGAGGCCCTAGTTAATAATACACGGCGTAAAGGGTGGTTAAGGAAAGTATTAACAATAAAGCCGAATGGCCCTTTTGCTGTCATACGCTTCTAGGTGTCCGAAGTCCAATATACGAAAGTAGCTTTAATAAAGTCCACCTGACCCCACGAAAGCTGAGAAA	1	3	0	2	2	2	2	1	0	1	0	0	1	3	2	0	0	2	2	0	0	0	0	1	1	1	1	1	1	1	1	0	9	0	5	5	0	0	0	0
OTU_832	Chordata	Actinopteri	Cypriniformes	Leuciscidae			96.491	Midori2	GCGGTTAAACGAGAGGCCCCAGTTAATAATACACGGCGTAAAGGTTGGTTAAGGAAAGCATTACAATAAAGCCGAATGGCCCTTTGGCTGTCATACGCTTCTAGGTGTCCGAAGCCCAATATACGAAAGTAGCTTTAATAAGCCCCACCTGACCCCACGAAAGCTGAGGAA	0	0	2	0	1	1	0	0	1	0	0	0	0	0	1	0	1	0	0	0	2	0	2	0	0	0	0	2	0	2	1	0	1	0	1	0	1	1	0	0
OTU_833	Chordata	Actinopteri	Gobiiformes	Gobiidae	Neogobius	Neogobius melanostomus	98.765	Midori2	GCTTTATACGAGAGGCCCAAGTTGACAAAAATCGGCGAAAAGCGTGGTTAGTGATATCACCTCCACTAAAGCCAAACACCTTCAAGGCTGTGATACGCCCCCGAAGACAGGAAGCCCAATCACGAAAGTAGCTTTAATTTTCATGAAGCCACGAAAGTTAGGAAA	0	2	3	7	6	2	3	4	1	1	1	4	1	1	2	3	3	1	2	2	5	9	2	5	6	2	1	3	2	1	2	1	5	2	4	0	0	1	0	2
OTU_834	Chordata	Actinopteri	Perciformes	Percidae	Sander	Sander lucioperca	97.468	manual check	GCGGTTATACGAGAGGCCCAAGTTGATAGACATCGGCGTAAAGCGTGGTTAAGACAAAAACAAAACTAAAGCCGAACACCTTCAGAGCTGTTATACGCACCCGAAGGTAAGAAGTTCAACCACGAAAGTGGCTTTATCTAACCTGAACCCACGAAAGCCAGCA	5	1	10	7	2	4	6	2	2	8	8	3	4	1	5	10	7	8	6	13	0	0	3	3	2	1	17	5	8	4	4	8	21	4	16	8	14	16	0	0
OTU_835	Chordata	Actinopteri	Anguilliformes	Anguillidae	Anguilla		95.714	Midori2	GCGGTTATACGAGAGGCCCAAGTTGATAGACATCGGCGTAAAGCGTGATTaaaaaacaaaaaaaCTAAAGCCAAACACTTCCCAAGCTGTCATACGCTACCGGAACATAAACGAAGCCCTATAACGAAAGTAGCTTTAATTTTCATGAAGCCACGAAAGCTAGGAAA	0	0	0	0	0	0	0	0	0	0	0	0	0	0	0	0	0	0	0	0	0	0	0	0	0	0	0	0	0	0	0	0	2	0	0	0	0	0	0	0
OTU_836	Chordata	Actinopteri	Gobiiformes	Gobiidae	Neogobius		96.988	Midori2	GCGGTTATACGAAGGCCCAAGTTGACAAGAATCGGCGAAAAGCGTGGTTAGTGATATCACCTCCACTAAAGCCAAACACCTTCAAGGCTGTAATACGCCCCCGAAGACAGGAGGCCCAATCACGAAAGTAGCTTTAATTTTCATGAAGCCACGAAAGCTGAGAAA	6	11	7	10	7	13	8	6	9	16	9	13	5	14	14	8	5	12	7	6	13	16	12	7	8	6	9	8	6	10	15	4	9	5	1	8	11	19	0	3
OTU_837	Chordata	Actinopteri	Cypriniformes	Leuciscidae	Abramis	Abramis brama	98.193	Midori2	GCTGTTAAACGAGAGGCCCCAGTTAATAATACACGGCGTAAAGGGTGGTTAAGGAAAGTATTAACAATAAAGCCGAATGGCCCTTTTGCTGTCATACGCCTCTAGGTGTCCGAAGTTCAACATACGAAAGTAGCTTTAATAACGCCCACCTGACCCCACGAAAGCTACGGCA	0	0	0	1	0	2	1	0	0	0	0	0	0	0	1	0	1	0	0	0	0	0	0	0	0	0	0	0	1	0	0	0	0	4	0	0	0	1	0	0
OTU_838	Chordata	Actinopteri	Cypriniformes	Leuciscidae			94.737	Midori2	GCGGTTAAACGAGAGGCCCTAGTTAATGATACACGGCGTAAAGGGTGGTTAAGGAAAACATAATAATAGAGCCAAATGGCCCTTTGGCTGTCATACGCTTCTAGGAGTCCGAAGCCCTAATACGAAAGTAACTTTAATAAACCCACCTGACCCCACGAAAGCTGAGAAA	1	1	12	4	1	2	0	13	0	0	0	1	1	1	1	0	0	0	11	3	0	0	0	0	0	0	0	0	0	0	0	0	2	3	2	5	1	1	0	0
OTU_839	Chordata	Actinopteri	Cypriniformes	Leuciscidae	Squalius	Squalius cephalus	97.661	Midori2	GCGGTTAAACGAGAGGCCCTAGTTAATAATACACGGCGTAAAGGGTGGTTAAGGAAAACATGACAATAAAGCCGAATGGCCCTTTGGCTGTCATACGCTTCTAGGTGTCCGAAGCCCAATATACGAAAGTAGCTTTAATCAAGTCCACCTGACCCTACGAAAGCTGAGGAA	24	37	26	16	21	65	32	17	13	32	39	38	30	42	12	28	35	24	12	15	21	0	8	41	6	20	16	41	51	24	15	10	23	25	18	53	48	11	0	0
OTU_840	Chordata	Actinopteri	Perciformes	Percidae	Perca		96.386	Midori2	GCGGTTATACGAGAGGCCCAAGTTGATACATCGGCGTAAAGCGTGGTTAAGATTAAAGACAATACCAAAGCCGAACACCTTCAGAGCTGTTATACGCACCCGAAGGTAAGAAGTTCAACCACGAAAGTGGCTTTATTACCCCTGAACCCACGAAAGCTACGATA	2	1	4	0	0	0	2	1	4	2	2	0	2	0	3	8	10	6	3	1	1	0	1	3	43	0	2	25	0	5	3	0	2	0	1	2	1	3	0	0
OTU_841	Chordata	Actinopteri	Gobiiformes	Gobiidae	Neogobius		96.386	Midori2	GCGGTTATACGAGAGGCCCAAGTTGACAAAAATCGGCGAAAAGCGTGGTTAGTGGCATCACCTCCACTAAAGCCAAACACCTTCAAGGCTGTAATACGCCCCCGAAGACAGCCCAATCACGAAAGTAGCTTTAATTTTCATGAAGCCACGAAAGCTAGGAAA	1	5	2	3	1	15	10	6	6	4	7	5	2	1	4	1	4	1	3	1	5	5	5	5	3	5	4	5	9	7	9	4	3	4	1	3	7	5	0	4
OTU_842	Chordata	Actinopteri	Cypriniformes	Leuciscidae			94.22	Midori2	GCGGTTAGACGAGAGGCCCTAGTTGATATTACAACGGCGTAAAGGGTGGTTAAGTATTAACAATAAAGCCGAATGGCCCTTTGGCTGTCATACGCTTCTAGGTGTCCGAAGTTCAACATACGAAAGTAGCTTTAATAACGCCCACCTGACCCCACGAAAGCTGAGAAA	137	257	270	313	372	348	340	398	297	245	268	435	445	431	606	376	479	338	465	341	65	1	53	85	157	208	242	199	267	169	556	262	413	518	153	205	198	120	0	0
OTU_843	Chordata	Actinopteri	Cypriniformes	Leuciscidae	Abramis		95.93	Midori2	GCGGTTAAACGAGACACCCCAGTTAATAATACGGCGTAAAGGGTGGTTAAGGAAAGTATTAACAGTAAAGCCGAATGGCCCTTTGGCTGTCATACGCTTCTAGGTGTCCGAAGTTCAACATACGAAAGTAGCTTTAGCAACGCCCACCTGACCCCACGAAAGCTGAGAAA	0	0	0	0	0	0	0	0	0	0	0	0	1	0	0	0	0	0	0	0	0	0	0	0	0	0	0	0	0	0	0	0	0	0	0	0	0	0	0	0
OTU_844	Chordata	Actinopteri	Gobiiformes	Gobiidae	Neogobius		96.988	Midori2	GCGGTTATACGAGAGGCCCAAGTTGACAAAAATCGGCGAAATCGTGGTTAGTGATATCACCTCCACTAAAGCCAAACACCTTCAGGGCTGTAATACGCCCCCGAAGACAGGAAGTCCAATCACGAAAGTAGCTTTAATTTTCATGAAGCCACGAAAGCTAGAAAA	1	0	4	6	1	2	2	0	1	1	6	1	1	0	1	1	0	12	1	3	3	4	0	1	3	2	0	2	1	0	3	2	4	6	0	1	2	1	0	2
OTU_845	Chordata	Actinopteri	Cypriniformes	Cyprinidae	Barbus		95.882	Midori2	GCGGTTATACGAGAGGCCCAAGTTGATATTATATGGCGTAAAGGGTGGTTAGGGAAATAATAATAAAGCCAAATGGCCCCTTGGCCGTCATACGCTTCTAGGTGTCCGAGGCCCTATATACGAAAGTAGCTTTAATTAACCCGCCTGACCCCACGAAAACTGAGAAA	1	3	2	2	0	3	3	1	1	1	2	0	1	2	1	4	4	4	0	0	0	3	10	11	0	6	5	7	0	2	3	4	0	3	2	0	2	1	0	0
OTU_846	Chordata	Actinopteri	Perciformes	Percidae	Perca		96.386	Midori2	GCGGTTATACGAGAGGCCCAAGTTGACAAAAATCGGCGTAAAGCGTGGTATATTAAAGACAATACTAAAGCCGAACACCTTCAGAGCTGTTATACGCATCCGAAGGTAAGAAGTTCAACCACGAAAGTGGCTTTATAGCCCCTGAACCCACGAAAGCTACGATA	9	5	4	2	4	1	5	6	8	2	0	1	8	11	2	8	15	13	7	6	0	4	2	7	8	5	3	11	6	4	2	12	14	9	4	12	5	5	0	0
OTU_847	Chordata	Actinopteri	Gobiiformes	Gobiidae	Neogobius		96.988	Midori2	GCGGTTATACGAGTGCCCAAGTTGACAAGAATCGGCGAAAAGCGTGGTTAGTGGTATCACCTCCACTAAAGCCAAACACCTTCAAGGCTGTAATACGCCCCCAAGACAGGAAGCCCAATCACGAAAGTAGCTTTAATTTTCATGAAGCCACGAAAGCTAGGAAA	0	0	0	0	0	0	0	0	2	0	0	0	0	1	0	0	0	0	0	0	0	0	0	0	0	0	0	0	0	0	0	1	0	0	0	0	0	2	0	0
OTU_848	Chordata	Actinopteri	Perciformes	Percidae	Perca	Perca fluviatilis	97.561	Midori2	GCGGTTATACGAGAGGCCCGAGTTGATAGACATCGGCGTAAAGCGTGGTTAAGATTAAAGACAATACTAAAGCCGAACACCTTCAGAGCTGTTATACGCATCCGAAGGTGAGAGGTTCAACCACGAAAGTGGCTTTATAGCCCCTGAACCCACGAAAGCTAGGAAA	0	6	2	3	7	5	1	1	1	0	7	3	1	3	0	3	6	2	3	4	0	3	2	1	5	5	6	4	2	1	1	4	8	1	4	5	2	1	0	0
OTU_849	Chordata	Actinopteri	Gobiiformes	Gobiidae	Neogobius		96.988	Midori2	GCGGTTATACGAGAGGCCCAAGTTGACAAAAATCGGCGAAAAGCGTGGTTAGTGATATCACCTCCACTAAAGCCAAACACCTTCATGCTGTAATACGCCCCCGAAGACAGGAAGCCCAATCACGAGGGTAGCCTTAATTTTCATGAAGCCACGAAAGCTAGGAAA	1	2	1	1	4	0	1	0	0	0	1	2	0	1	2	1	1	3	0	1	0	2	1	2	1	1	1	0	2	0	0	1	0	0	0	0	0	0	0	0
OTU_850	Chordata	Actinopteri	Cypriniformes	Leuciscidae	Leuciscus		97.576	Midori2	GCGGTTAAACGAGAGGCCCCAGTTAATAATACACGGCGTAAAGGGTGGTTAAGGAAAGCAGCAATAAAGCCGAATGGCCCTTTGGCTGTCATACGCTTCTAGGTGTCCGAAGCCCAATATACGAAAGTAGCTTTAATAAAGCCCACCTGACCCCACGAAAGCTACGATA	9	4	3	5	2	5	0	5	7	4	6	8	11	8	5	5	5	6	10	8	3	3	3	3	2	6	20	11	2	1	4	8	11	12	4	1	1	7	0	0
OTU_851	Chordata	Actinopteri	Perciformes	Percidae	Perca	Perca fluviatilis	97.561	Midori2	GCGGCTATACGAGGGGCCCAAGTTGATAGACATCGGCGTAAAGCGTGGTTAAGATTAAAGACAATACTAAAGCCGAACACCTTCAGAGCTGTTATACGCATCCGAAGGTAAGAAGTTCAACCACGAAAGTGGCTTTATAGCCCCTGAATCCACGAAAGCTAGGAAA	11	11	8	12	8	5	10	7	7	7	5	5	4	3	4	11	16	6	10	5	1	3	10	6	4	6	6	4	9	1	10	10	10	8	9	12	12	5	0	0
OTU_852	Chordata	Actinopteri	Cypriniformes	Cyprinidae			96.491	Midori2	GCGGTTAGACGAGAGGCCCTAGTTGATATTATAACGGCGTAAAGGGTGGTTAGGGATAAATAATAATAAAGCCAAATGGCCCCTTGGCCGTCATACGCTTCTAGGTGTCCGAGGCCCTATATACGAAAGTAGCTTTAGTACCGCCCACCTGACCCCACGAAAACTGAGAAA	0	8	46	29	4	12	26	20	9	7	23	21	254	8	28	26	15	14	16	16	0	13	41	32	31	23	30	56	10	16	36	20	14	11	6	10	6	22	0	0
OTU_853	Chordata	Actinopteri	Cypriniformes	Leuciscidae	Abramis	Abramis brama	98.193	Midori2	GCGGTTAAACGAGGGGCCCCAGTTAATAATACACGGCATAAAGGGTGGTTAAGGAAAGTATTAACAATAAAGCCGAATGGCCTTTTGGCTGTCATACGCTTCTAGGTGTCCGAAGTTCAACATACGAAAGTAGCTTTAATAACGCCCACCTGACCCCACGAAAGCTACGATA	1	1	4	4	3	1	0	3	2	3	4	5	0	6	1	2	27	5	4	4	22	1	4	1	1	0	5	0	4	5	0	0	3	2	7	2	0	0	0	0
OTU_854	Chordata	Actinopteri	Cypriniformes	Leuciscidae	Leuciscus		95.322	Midori2	GCGGTTAAACGAGAGGCCCTAGTTAATAATACACGGCGTAAAGGGTGGTTAAGGAAAGCATAACAATAAAGCCGAATGGCCCTTCTGTCATACGCTTCTAGGAGTCCGAAGCCCTAATACGAAAGTAACTTTAATAAACCCACCTGACCCCACGAAAGCTGAGAAA	69	170	221	227	137	101	230	166	151	247	239	408	529	545	404	360	291	329	268	293	33	0	26	10	43	158	113	105	104	54	229	176	376	268	100	60	90	57	0	0
OTU_855	Chordata	Actinopteri	Gobiiformes	Gobiidae	Neogobius	Neogobius melanostomus	97.576	Midori2	GCGGTTAAACGAGAGGCCCCAGTTGACAAAAATCGGCGAAAAGCGTGGTTAGTGATATCACCTCCACTAAAGCCAAATACCTTCAAGGCTGTAATACGCCCCCGAAGACAGGAAGCCCAATCACGAAAGTAGCTTTAATCTTCATGAAGCCACGAAAGCTAGGAAG	9	10	7	9	18	16	8	6	15	9	9	6	14	13	17	15	17	16	12	18	10	5	3	16	12	10	18	27	6	10	24	18	29	26	6	15	14	24	0	6
OTU_856	Chordata	Actinopteri	Perciformes	Percidae	Sander		96.364	Midori2	GCGGTTATACGAGTGCCCAAGTTGATAGACATCGGCGTAAAGCGTGGTTAAGACAAAAACAAAACTAAAGCCGAACACCTTCAGAGCTGTTATACGCACCCGAAGGTAAGAAGTTCAACCACGAAGGTGGCTTTATAGCCCCTGAACCCTCGAAAGCTACGATA	0	1	3	2	1	1	0	0	1	0	1	0	0	0	0	0	0	0	3	0	0	0	0	0	2	0	1	0	1	0	0	0	0	0	2	0	1	0	0	0
OTU_857	Chordata	Actinopteri	Cypriniformes	Cyprinidae			90.361	Midori2	GCGGTTAAACGAGAGGCCCTAGTTAATAATACACGGCGTAAAGGGTGGTTAAGGATAAACAAAAATAAAGTCAAATGGCCCCTTGGCCGTCATACGCTTCTAGGAGTCCGAAGCCCAATCACGAAAGTAGCTTTAATTTTCATGAAGCCACGAAAGCTAGGAAA	2	5	6	20	17	8	27	17	9	9	23	35	20	16	31	30	27	17	15	17	0	0	4	3	5	6	15	19	6	9	17	17	10	22	10	12	14	5	0	0
OTU_858	Chordata	Actinopteri	Perciformes	Percidae	Perca	Perca fluviatilis	98.75	Midori2	GCGGTTATACGAGAGGCCCAAGTTGATAGACATCGGCGTAAAGCGTGGTTAAGATTAAAGACAATACTAAAGCCGAACACCTTCAGAGCTGTTATACGCATCCGAAGGTAAGAAGTTCAACCACGAAAGTGACTTTATAGCCCCTGAACCCACGAAGGCTTAGAAA	5	8	6	3	3	5	14	5	6	1	1	8	8	4	4	17	9	5	4	4	4	9	8	3	6	7	6	3	4	5	3	2	10	6	6	7	7	3	0	0
OTU_859	Chordata	Actinopteri	Gobiiformes	Gobiidae	Neogobius	Neogobius melanostomus	98.758	Midori2	GCGGTTATACGAGAGGCCCAAGTTGACAAAAATCGGCGAAAAGCGTGGTTAGTGATATCACCCTCACTAAAGCCAAACACCTTCAAGGCTGTAATACGCCCCCGAAGACAGGAAGCCCAATCACGAAAGTAGCTTTAATTTTCATGAAGCCACGAAAGCTACGGCA	13	21	15	7	5	8	12	6	11	15	7	10	17	11	11	15	10	6	11	6	3	11	12	15	12	10	13	5	9	8	11	2	8	15	14	7	12	22	0	6
OTU_860	Chordata	Actinopteri	Cypriniformes	Leuciscidae	Abramis	Abramis brama	98.193	Midori2	GCGTTTAAACGAGAGGCCCCAGTTAATAATACACGGCGTAAAGGGTGGTTAAGGAAAGTATTAACAAAAGCCGAATGGCCCTTTGGCTGTCATACGCTTCTAGGTGTCCGAAGTTCAACATACGAAAGTAGCTTTAATAACGCCCACCTGACCCCACGAAAGCTACGATA	5	4	2	4	1	2	2	2	3	5	2	2	2	6	8	0	4	8	5	0	0	1	2	1	3	1	3	7	1	2	2	3	6	0	6	6	4	0	0	0
OTU_861	Chordata	Actinopteri	Cypriniformes	Leuciscidae			97.076	Midori2	TCGGTTAAACGAGAGGCCCCAGTTAATAATACACGGCGTAAAGGGTGGTTAAGGAAAGTATTAACAATAAAGCCGAATGGCCCTTTGGCTGTCATACGCTTCTATGTGTCCGAAGCCCAATATACGAAAGTAGCTTTAATAAAGCCCACCTGACCCCACGAAAGCTGAAAAA	8	5	7	8	4	4	1	2	6	9	5	8	9	12	8	22	5	16	4	7	8	7	8	1	9	7	7	7	3	2	8	7	18	12	4	7	9	12	0	0
OTU_862	Chordata	Actinopteri	Cypriniformes				96.933	Midori2	GCGGTTAGACGAGAGGCCCTAGTTGATATACAACGGCGTAAAGGGTGGTTAAGGATAAACAAAAATAAAGTCAAATGGCCCCCCGTCATACGCTTCTAGGAGTCCGAAGCCCTAATACGAAAGTAACTTTAATAAACCCACCTGACCCCACGAAAGCTACGATA	0	0	0	0	0	0	0	0	0	0	0	0	0	0	0	0	0	0	0	0	0	0	0	0	0	0	0	0	0	0	0	0	0	0	0	0	0	0	0	0
OTU_863	Chordata	Actinopteri	Perciformes	Gasterosteidae	Gasterosteus		96.226	Midori2	GCGGTTATACGAGAGGCCCAAGTTGATAGACATCGGCGTAAAGCGTGGTTAAGCTAAAATTAAAACTAAAGCCGAACACCCCCAAAGCTGTTATACGCATCCGGAGGTGAGAAGTTCAACCACGAAGGTGGCTTTATCTAACCTGAACCCACGAAAGCTGAGAAA	61	71	49	39	42	22	33	23	24	27	18	28	63	43	65	54	50	32	34	45	0	39	69	39	39	15	55	29	59	34	41	30	49	35	78	81	93	88	0	0
OTU_864	Chordata	Actinopteri	Gobiiformes	Gobiidae	Neogobius	Neogobius melanostomus	98.193	Midori2	GCGGTTATACGAGAGGCCCAAGTTGACAAAAATCGGCGAAAAGCGTGGTTAGTGATATCACCTCCACTAAAGCCAAACACCTTCAAGGCTGTAATACGCCCCCGAAGACAGGAAGCCCAATCACGAAAGTAGCTTTAATTTCATAAACCACGAAAGCTAGGAAA	21	19	16	24	27	29	17	9	12	30	35	23	12	16	24	22	19	18	16	22	18	50	22	25	18	7	20	26	15	23	20	17	23	14	18	17	17	32	0	8
OTU_865	Chordata	Actinopteri	Cypriniformes	Leuciscidae	Abramis		95.882	Midori2	GTGGTTAAACGAGAGGCCCCAGTTAATAATACACGGCGTAAAGGGTGGTTAAGGAAAGTATTAACAATAAAGCCGAATGGCCCTTTGGCTGTCATACGCTTCTAGGTGTCCGAAACCCAATATACGAAAGTAGCTTTAATAAGGCCCACCTGACCCCACGAAAGCTAGGAAA	4	5	10	9	2	9	1	4	3	2	2	5	6	3	8	17	13	8	5	9	4	1	8	1	3	10	7	9	1	6	13	8	10	4	4	4	3	12	0	0
OTU_866	Chordata	Actinopteri	Cypriniformes	Leuciscidae	Squalius	Squalius cephalus	97.076	Midori2	GCGGTTAAACGAGAGGCCCCAGTTAATAATACACGGCGTAAAGGGGGTTAAGGAAAACATAACAATAAAGCCGAATGGCCCTTTGGCTGTCATACGCTTCTAGGTGTCCGAAGCCCAATATACGAAAGTAGCTTTAATAAAGTCCACCTGACCCCACGAGAGCTGGGAAA	325	308	174	204	183	721	188	179	145	397	360	541	223	448	124	231	398	335	234	342	154	0	280	494	139	165	528	677	314	203	406	328	598	395	289	264	290	253	0	0
OTU_867	Chordata	Actinopteri	Gobiiformes	Gobiidae			93.976	Midori2	GCGGTTATACGAGAGGCCCAAGTTGACAAAAATCGGCGAAAAGCGTGGTTAAGACAAAAACAAAACTAAAGCCGAACACCTTCAAGGCTGTAATACGCCCCCGAAGACAGGAAGCCCAATCACGAAAGTAGCTTTAATTTTCATGAAGCCACGAAAGCTAGGAAA	16	21	17	10	15	6	17	28	23	10	20	15	16	6	19	28	32	25	19	16	10	0	2	6	11	3	15	34	4	24	21	33	30	8	17	10	7	9	0	0
OTU_868	Chordata	Mammalia					84.94	Midori2	GCGGTCATGCGATAGACCCAAACTATTAAACCTCGGTGTAAAGCATGTTTAAGATACCTCCTCCCCATAAGAATAAACTCTACCTAGGCCGTAAAAAGCTCCAGCTAGAGAAAAAATAACTTACAAAAGTAATCTTAGCAGATCTGATAACATGACAGCTAAAACC	0	0	0	0	0	0	0	0	12	0	0	0	0	0	0	0	0	0	0	0	0	0	0	0	0	0	0	0	0	0	0	0	0	0	0	0	0	0	0	0
OTU_869	No Match	No Match	No Match	No Match	No Match	No Match	No Match	Midori2	CTGTACTGGAACGAATCCGGCGTACCGGTATCTGATACCTTCGACGATGTCTACTACTCGCAGGAGAATGGACTCGAAGAGAGTCGTCACGTTTTCCTCCAGGGCAATGATTTGCCGCAGCGCTGGCACAACCACCCGCGGCGGCATTTCTGTATCGG	0	0	0	0	0	0	0	0	0	0	0	0	7	0	0	0	0	0	0	0	0	0	0	0	0	0	0	0	0	0	0	0	0	0	0	0	0	0	0	0
OTU_870	Bacillariophyta	Coscinodiscophyceae	Thalassiosirales				100	Midori2	CGAGGCTCAACTTCAAAATCGCAGTCGAAACTATTAGACTAGAGTATAGTAGAGGTAAAGGGAATTTCCAGTGGAGCGGTGAAATGCGTAGATATTGGAAAGAACACCGATGGCGAAAGCACTTTACTGGGCTATTACTAACACTCAGAGACGAAAGCTAGGGTAG	0	0	0	0	0	0	0	0	0	0	0	0	0	0	0	0	0	0	0	0	0	0	0	0	0	0	0	0	0	0	0	0	0	0	0	0	0	0	0	0
OTU_871	No Match	No Match	No Match	No Match	No Match	No Match	No Match	Midori2	AAGCTGACAACTGCAGTCACACGAAAACCCATGCCCGGGGTAATAACCAAATTAGGCGAGCTCTCAAGTGCCAACGCAATGCTCAATGATTGAAACAAAGCCAAGCCAACCGTGCCATACCGTGTGTACTGGGTGATTTTACGTCTGCCCGACTCGCCTTCTTTTTTCAGAGCTTC	0	0	0	0	0	0	0	0	0	0	0	0	0	0	0	0	0	8	0	0	0	0	0	0	0	0	0	0	0	0	0	0	0	0	0	0	0	0	0	0
OTU_872	Chordata	Actinopteri	Gobiiformes	Gobiidae	Neogobius		96.988	Midori2	GCGGTTATACGAGAGGCCCAAGTTGACAAAAATCGGCGAAAAGCGTGGTTAGTGATATCACCTCCACTAACGCCAAACACCTTCAAGGCTGTAATACGCCCCCCAAGACGAAGCCCAATCACGAAAGTAGCTTTAATTTTCATGAAGCCACGAAAGCCAGGAAA	0	0	0	0	1	0	0	0	0	0	0	0	0	0	0	0	0	0	0	0	0	0	0	0	0	0	0	0	0	0	0	0	0	0	0	0	0	0	0	0
OTU_873	Chordata	Actinopteri	Gobiiformes	Gobiidae			94.578	Midori2	GCGGTTATACGAGAGGCCCAAGTTGACAAAAATCTGCGAAAAGCGTGGTTAGCGATAACACTAAAGCCAAACACCTTCAAGGCTGTAATACGCCCCCGAAGACAGGAAGCCCAATCACGAAAGTAGCTTTAATTTTCATGAAGCCACGAAAGCTAGGAAA	0	0	0	0	0	0	0	0	0	0	0	0	0	0	0	0	0	0	0	0	0	0	0	0	0	0	0	0	0	0	0	0	0	0	0	0	0	0	0	0
OTU_874	No Match	No Match	No Match	No Match	No Match	No Match	No Match	Midori2	AGGTTGAATATGGAGATGCCGCTGCTTCCACACTGCTTTGAATAACCACAAAATATAGTAACAGTGAGAGTCAGTGAGATAATTTGCTGTTCTCTTTCTTAGGTTGATATTATGATTTCAAGTTTTCATTCATTAGTTTTGTGGAGTGACCATGCTATAATTGATATTTTGGCCC	0	0	0	0	0	0	0	0	0	11	0	0	0	0	0	0	0	0	0	0	0	0	0	0	0	0	0	0	0	0	0	0	0	0	0	0	0	0	0	0
OTU_875	No Match	No Match	No Match	No Match	No Match	No Match	No Match	Midori2	CCGGCGTCCCCGGCGGCTGCCTGCGTGGTTGGGTTGCATGCGGTCCAACACAGGGCCCCACACAGTGCAAACGCAGCGCGTTGTTTCATGCGCGTGCTTGTGTGGTGCAGCACTGCGCCCGTCAAGCGCGCGGTCACTGACGTGCGCCGCAAAGCGCCACGGTCGTG	0	0	0	0	0	0	0	0	0	0	0	0	0	0	0	0	0	0	0	0	0	0	1	0	0	0	0	0	0	0	0	0	0	9	0	0	0	0	0	0
OTU_876	No Match	No Match	No Match	No Match	No Match	No Match	No Match	Midori2	GATCAAGAGAGAGACACTGCTGTACATCCGCACAGAGAACCACCAAGTCAGTCAATATGCTCACATAACGTTATGCATGCCATATAGCTGCCGGTGAGAGGTGCGCCTCAGGGGGGCGGATTTACACTTTACCGAGCTGCGCATCAGGCCTTTCAAAAACGCTC	0	0	0	13	0	0	0	0	0	0	0	0	0	0	0	0	0	0	0	0	0	0	0	0	0	0	0	0	0	0	0	0	0	0	0	0	0	0	0	0
OTU_877	No Match	No Match	No Match	No Match	No Match	No Match	No Match	Midori2	ATCAGCAACAGCAGGCCGAAGATGTCAACGCGCCTGGGCTGACTCGACTTGACAGCTTCTTGTACGTGCGAAGCACTGCGCCACAAAGCCCATATGCCCATCGGTAGGTTGATGTAAAAAGCCCATGGCCAACCTGCTTGGTCAGTCACCCAACTTCC	0	0	0	0	0	0	0	0	0	0	0	0	0	0	0	0	0	0	0	0	0	7	0	0	0	0	0	0	0	0	0	0	0	0	0	0	0	0	0	0
OTU_878	No Match	No Match	No Match	No Match	No Match	No Match	No Match	Midori2	GCGGTAATACAGATAGGATTCATGGAAGGAAAAAGGAAGAATCAAAAGGTGAAAAGAAAAGATAGGATTAATTAAAGGATATGATGACTGGATGTAATCAATTCATATAGGATAACTAAAGAATTATCTTATCTTAATCATTAACTTTATGATTAAAGTCTGGGTAG	0	0	0	0	0	0	0	0	0	0	0	0	0	0	0	0	0	0	0	0	0	0	0	0	0	0	0	0	0	0	0	0	0	0	0	0	0	0	0	0
OTU_879	Chordata	Mammalia	Rodentia	Castoridae	Castor	Castor fiber	98.171	Midori2	GCGGTCATACGATAGACCCAAACTAATAAACCCCGGCGTAAAGCGTGTTTAAGAGCCTTACCCTGAATAAGAATAAACTTTACCTAGGCCGTAAAAAGCTATAGCTAAGAAAAAAATAACTTACGAAAGTAATCTTAATAAGTCTGATAACACGAAAGCTACGATA	2	0	2	1	0	0	1	0	0	0	0	4	4	3	1	3	7	0	0	4	0	0	1	0	0	0	0	0	1	0	0	0	0	0	0	0	0	0	0	0
OTU_880	Streptophyta						78.571	Midori2	GCGGTAATACGAGTGGTCCAAGCGTTAGTCGGAATTACTGGTCTTGAGGAAGGTAGAGGCCGGCAGAACGATCGGTGGAGCGGTGGAATGCGTAGAGATCGATCGGAATGCCAAAGGTGAAGACAGCCGGCTGGGCCTTTCCTGACGCTGAGGCACGAAAGCGTGGGGAG	0	0	0	0	0	0	0	0	0	0	0	0	0	0	0	0	0	0	0	0	0	0	0	0	0	0	0	0	0	0	0	0	0	0	0	0	0	0	0	0
OTU_881	Chordata	Actinopteri	Perciformes	Percidae			91.139	Midori2	GCGGTTATACGAGAGGCCCAAGTTGATAGACATCGGCGTAAAGCGTGGTTAAGATTAAAGACAATACTAAAGCCGAACACCTTCAGAGCTGTTATACGCATCCGAAGACAGGAAGCCCAATCACGAAAGTAGCTTTAACACCTTTGAACTCACGACAGTTGAGGAA	0	0	0	0	0	0	0	0	0	0	0	0	0	0	0	0	0	0	0	0	0	0	0	0	0	0	0	0	0	0	0	0	0	0	0	0	0	0	0	0
OTU_882	No Match	No Match	No Match	No Match	No Match	No Match	No Match	Midori2	TCTCTCAATTACGAAATAGGAATAGCTGCGAAAACTAATCCAGAATCGAACGTTGAGACTGACGAATACAGTCGGTCCTCCTTCATTTGAATGTAATATTGTACTCCCCTCCCTATCGCAAATGTCCCGATCATCAATAAGAGCAACCTGGGACAGGCCCATAGAATGA	0	0	0	0	0	0	0	0	0	0	0	0	0	0	0	0	0	0	0	0	0	0	0	0	0	0	0	0	0	0	0	0	0	0	0	0	0	0	0	0
OTU_883	Bacillariophyta	Mediophyceae					78.899	Midori2	GCGGTAAGACGAGTCTCACGAACGTTATTCGGAATTACTGGGCTTAAAGGGTGCGTAGGCGGTGGAGTAAGTCGGATGTGAAATACCATAGCTTAACTATGGAACTGCACTCGATACTACTTTGCTTGAGTAAGACTGGGTCTTTACTGACGCTGATGCACGAAAGCTAGGGTAG	0	0	0	0	0	0	0	0	0	0	0	0	0	0	0	0	0	0	0	0	0	0	0	0	0	0	0	0	0	0	0	0	0	0	0	0	0	0	0	0
OTU_884	No Match	No Match	No Match	No Match	No Match	No Match	No Match	Midori2	CAAATAGGCATAGACGACTATCGTCCCAACCTCCCAAAAAATCAACGCATTGTCTCCTTCGGCGATGTCCACGGCGACATTACCGCATTACGTACTTTCCTCATCACGGCCAGAGTCCTTGATCCAGAATCCACCAATGACAATCCTAGATGGAGCGGAGGTGATACCATTTGTGTA	0	0	0	0	0	0	0	0	0	0	0	0	0	0	0	0	0	1	0	0	0	0	0	0	0	0	0	2	0	0	0	0	0	0	0	8	0	0	0	0
OTU_885	No Match	No Match	No Match	No Match	No Match	No Match	No Match	Midori2	TCCGTTTGGAAGCTGCCCCGTCGCCAAAAAATACATAACGGGGGTTTGTCCTGCCAGGGAGACAGCGTTTGGATCGCATTTCAACTCATTCAACAGCCACTGCAGAGTCGTTTGTCCACACGTGACAGAGCAATGAAGTAAGGTGCAACCCATTGAGTTTCT	0	0	0	0	0	0	0	0	0	0	0	0	0	0	12	0	0	0	0	0	0	0	0	0	0	0	0	0	0	0	0	0	0	0	0	0	0	0	0	0
OTU_886	No Match	No Match	No Match	No Match	No Match	No Match	No Match	Midori2	CTTCCGGCTCTCTGACCCGTCACTAGCCGGAATTGAACCTGATCCAAGTGGTTTCCGGAGGGATTGTCGCTCGTAAGTCTCCGACAACTTCACGCTACCGCGTCGAAAAGCACGAATTCGCAATCCGCCATCCACTAGCTCATGATCATCTCGCTCTTTG	0	0	0	0	0	0	0	0	0	0	0	0	0	7	0	0	0	0	0	0	0	0	0	0	0	0	0	0	0	0	0	0	0	0	0	0	0	0	0	0
OTU_887	Ascomycota	Pezizomycetes					83.178	Midori2	TCAACTCGGAAAAATGCCTTGAAGACTATCTGACTAGAGGATTGGAGGGGAGATTGGAATTCTCGGTGTAGCAGTGAAATGCGTAGATATCGAGAGGAACACCAGTGGCGAAGGCGAATCTCTGGACAATTCCTGACACTGAGGCACGAAAGCCAAGGGAG	0	0	0	0	0	0	0	0	0	0	0	0	0	0	0	0	0	0	0	0	0	0	0	0	0	0	0	0	0	0	0	0	0	0	0	0	0	0	0	0
OTU_888	No Match	No Match	No Match	No Match	No Match	No Match	No Match	Midori2	GTATTGTAATCAGCCGTTTTCGACCAATTCCCGTTTCTGTCTCTGAATTCAACCAATTTTCCAATCTTCTGGTCGTGAACCAAAATCATCGCCACGTTGCTGGCAGAAAACACCTTCTTCTGGGCAGACAACACCGTATAATTCACTCCGGGCAACACCCC	0	0	0	0	0	0	0	0	0	0	0	0	0	0	0	0	0	0	0	0	0	0	0	0	0	6	0	0	0	0	0	0	0	0	0	0	0	0	0	0
OTU_889	No Match	No Match	No Match	No Match	No Match	No Match	No Match	Midori2	CCTTCAGAAATTGGCTTATCCTCCCCGTCCACCTTTCTCCATGGTGCTATACCCAGATCCTGAAAGGACTTTCGCTCCTCCGTAAAAACAACCCCTCCTGGTATGCCAAATCTGTCGGTGTGTACAATCACAATGTCGAATGGAACGATGCCCCAATGGTTACGTCATTTCAACCGG	0	0	0	0	0	0	0	0	0	0	0	0	0	0	8	0	0	0	0	0	0	0	0	0	0	0	0	0	0	0	0	0	0	0	0	0	0	0	0	0
OTU_890	No Match	No Match	No Match	No Match	No Match	No Match	No Match	Midori2	GCATCGTATATGCCACCTAAGGCCATTTGTTTGAGCGTGAATAAAGCCATTTCGCTGGCTTCTTTGTCGCCATAAACTTCGCTGTATTTTAACAAGAATTGCCAGTTGGAAGGCAAAGGAAATTTAGGTGCTCTTCTGCTTCCTCCATATACTCCGT	0	0	0	0	0	0	0	0	0	0	0	0	0	0	0	0	0	0	0	0	0	0	0	3	6	0	0	0	0	0	0	0	0	0	0	0	0	0	0	0
OTU_891	Chordata	Mammalia	Artiodactyla	Suidae	Sus		96.97	Midori2	GCGGTTATACGAGAGGCCCAAATTAATAGATCCACGGCGTAAAGAGTGTTTAAGaaaaaaaaTCACAATAGAGTTAAATTATAACTAAGCTGTAAAAAGCCCTAGTTAAAATAAAATAACCCACGAAAGTGACTCTAATAATCCTGACACACGATAGCTAGGACC	0	0	5	0	0	1	0	0	7	0	0	0	0	0	2	0	0	0	0	0	0	0	0	0	0	0	0	0	1	0	0	3	0	0	0	0	0	0	0	0
OTU_892	No Match	No Match	No Match	No Match	No Match	No Match	No Match	Midori2	TTCTGTCAGCTGCAGCCACAACTGTTACTGACGTTGCAACCAATTCATCAAAAACAGAATGTTCTAATATCTGCAGGGCTGCGCAGGAGCCGGAGAATGCGCACAGCCACCTGCTGAGCATGGTGCTGGGCAACATACAGGCACACCATGTAACACCCCACAACTGTCA	0	0	0	0	0	0	8	0	0	0	0	0	0	0	0	0	0	0	0	0	0	0	0	0	0	0	0	0	0	0	0	0	0	0	0	0	0	0	0	0
OTU_893	No Match	No Match	No Match	No Match	No Match	No Match	No Match	Midori2	GGTAGTAGGGCTGTCTGGCGAGCTTCAGGACCCGGCACGTCACCGCGACAGGGACACCGTCGGCGGCGTTAACTGAATCCTGACCTGCGTGCTGCCCCGGGGGCCCGGCCATTGGACCGGTTGTGGCACTTGTGGTCCGTGGCTGTATTTGACGATTTGTCCATCGACGTCGAGCA	0	0	0	0	0	0	0	0	0	0	6	0	0	0	0	0	0	0	0	0	0	0	0	0	0	0	0	0	0	0	0	0	0	0	0	0	0	0	0	0
OTU_894	No Match	No Match	No Match	No Match	No Match	No Match	No Match	Midori2	AAAAGTGATGTTCGTCCACATTGTGAAGAAATCAGTCGCGTACATCGAGTCCCCATTTAGGTCGTTGTCAAGGCGCGTGCCAGGCACCGGCCTCCAATTTGTTTGCGATGTTAATTGGTCCATTCATGTCGCAGGAATGCGGAGGCATAAAGATTGCCGCATGGC	0	0	0	0	0	0	0	0	0	0	0	0	0	0	0	0	0	0	0	0	0	0	0	0	7	0	0	0	0	0	0	0	0	0	0	0	0	0	0	0
OTU_895	No Match	No Match	No Match	No Match	No Match	No Match	No Match	Midori2	GCTTTCCATCCTTCTCCACCACCGCAGCAGCAATCCGCGCCTTGCTCGCTGCAGTAACCGTGCCCTTCGCACACCCCTTGGTCGCTGCAAACTCACTAAACGTGACTAGCAACCCTTAAACGCTCCTAATTCAGTTCAATACTATGTAACCATTGAACTCT	0	0	0	0	0	0	0	0	0	0	9	0	0	0	0	0	0	0	0	0	0	0	0	0	0	0	0	1	0	0	0	0	0	0	0	0	0	0	0	0
OTU_896	No Match	No Match	No Match	No Match	No Match	No Match	No Match	Midori2	AATCCAGGATGGACTACAAGAACCCTAAATTATTGGGACGTATCCTTGAGCACTCGTTCAAAGCGCTTGGGCTGGGCTTCGGAGCAACCGAAAATGAAGTCAAGGTGAAATATCATGCACTAGCCCAGATCTATCACCCTGACAAGCACAATCCAGCA	0	0	0	0	0	0	0	0	0	0	0	0	0	0	0	0	0	6	0	0	0	0	0	0	0	0	0	0	0	0	0	0	0	0	0	0	0	0	0	0
OTU_897	No Match	No Match	No Match	No Match	No Match	No Match	No Match	Midori2	AGAAAGCTCGGCCGGCATCAGATGATGCGCTCCACGCAGCCCCACCGCGTTGAGCTTCATCAAAACCATGTCACGGATCACTTCTTCCGGAAGATCCGTATGCTCGCGCATCAGATAGGCCACGTTGTCGAATACCGAGATGTCGGTAAACAATGCGC	0	0	0	0	0	0	7	0	0	0	0	0	0	0	0	0	0	0	0	0	0	0	0	0	0	0	0	0	0	0	0	0	0	0	0	0	0	0	0	0
OTU_898	No Match	No Match	No Match	No Match	No Match	No Match	No Match	Midori2	CTTGAGAAACTTCTCGACTGCTGAGCGCTTTGTCTCATAGTCGTGATTCTCAATCTTTGGCGTCAATCGCACTTCCTTCACCACAATGTGGGTCTGGTTCTGACGTGCTTCGCGAGCTTTCTGCGCAATCTCGTACTTGTACTTTCCAAAGTCCATGATCTTG	0	0	0	0	0	0	0	0	0	6	0	0	0	0	0	0	0	0	0	0	0	0	0	0	0	0	0	0	0	0	0	0	0	0	0	0	0	0	0	0
OTU_899	Chordata	Actinopteri	Gobiiformes	Gobiidae	Ponticola	Ponticola kessleri	98.171	Midori2	GCGGTTATACGAGAGGCCCGAGTTGACAAACATTCGGCGTAAAGCGTGGTTAATAACTTATTTACTAAAGCCAAACACCTTTAAGGCTGTTATACGCCCCCAAAGGTAGGAAGACCCCTCACGAAAGTAGCTTTAATTACTATGAATCCACGACAGTTGAGGAA	0	2	0	0	0	1	1	0	0	0	0	0	0	0	1	0	0	1	7	0	0	0	0	0	0	0	0	0	0	0	0	0	0	1	0	2	0	0	0	0
OTU_900	Chordata	Actinopteri	Perciformes	Percidae	Perca	Perca fluviatilis	98.125	Midori2	GCGGTTATACGAGAGGCCCAAGTTGATAGACGTCGGCGTAAAGCGTGGTTAAGATTAGAGACAATACTAAAGCCGAACACCTTCAGAGCTGTTATACGCATCCGAAGGTAAGAAGTTCAACCGCGAAAGTGGCTTTATAGCCCCTGAACCCACGAAAGCTGAGAAA	2	11	4	1	0	4	7	3	6	0	8	3	5	2	3	4	6	7	3	2	3	18	4	7	7	7	0	3	3	5	1	4	4	1	1	0	0	2	0	0
OTU_901	No Match	No Match	No Match	No Match	No Match	No Match	No Match	Midori2	GGCGTACATCAGCGGTGCGGCGGACCAATGTTCCGTTGCTGTGGAGCGCAAAATCGCTGAGCATAGTAAGATGAAGAGGGTTACTAAGAAGTGGAAGCGTAGCCGTCGTCAGTCGAAGTCGCAGAggggggggAGCCGCAGGCGTCAGGACACCGTTTGCCAACAG	0	0	0	0	0	0	0	0	0	0	0	0	0	0	0	0	0	0	5	0	0	0	0	0	0	0	0	0	0	0	0	0	0	0	0	0	0	0	0	0
OTU_902	No Match	No Match	No Match	No Match	No Match	No Match	No Match	Midori2	GCGTAGTTTGCGACCATGCTCTCCCTAGTCAAGAGGGACATCAAGGGATGCTTCTTTTCGACGGCGAATTCGGAAATCTGGTTGTGGAGTTGTGCTGCACGGCCACATCGGTTCTGCAAAAGCGTGGGGTGGCGTTTGATGGAATGCCGATCGCTCAGGTTGCTGAGATAATTC	0	0	0	0	0	0	0	0	0	7	0	0	0	0	0	0	0	0	0	0	0	0	0	0	0	0	0	0	0	0	0	0	0	0	0	0	0	0	0	0
OTU_903	No Match	No Match	No Match	No Match	No Match	No Match	No Match	Midori2	TTGCTCAACACATTCAGGCCCATTTCCTTGCCGCCCTGCCACACCTTGCCCGCCTGGAGGGTATTTGGTGGCCATCGTGATGACCGGATAAGGTGGAGGTGCAAACCCTTAACCACTTTGACCCTTGAAGGAAATCACGATGACCGACACCACTATCGCACTGCGCGAGCTGCTG	0	0	0	0	0	0	5	0	0	0	0	0	0	0	0	0	0	0	0	0	0	0	0	0	0	0	0	0	0	0	0	0	0	0	0	0	0	0	0	0
OTU_904	Chordata	Actinopteri	Perciformes	Percidae			94.643	Midori2	GCGGTTATACGAGAGGCCCAAGTTGATAGACATCGGCGTAAAGCGTGGTTAAGGAAAGTATTAACAATAAAGCCGAACACCTTCAGAGCTGTTATACGCATCCGAAGGTAAGAAGTTCAACCACGAAAGTGGCTTTATAGCCCCTGAACCCACGAAAGCTACGATA	0	0	0	0	0	0	0	0	0	0	0	0	0	0	0	0	0	0	0	0	0	0	0	0	0	1	0	0	0	0	0	0	0	0	0	0	0	0	0	0
OTU_905	No Match	No Match	No Match	No Match	No Match	No Match	No Match	Midori2	ATCCACTACCAGAGAAAACCTTCAGCTGTGCCCGATGTGGCCACACTCCCGTCTGTTTCAATCGATGCCATTTGCATCCAGAGTTGGCAATGCCATCGGAGCTCTCCTCGGAGGACCATCCCTTCTTCATCTCGATCAGGTCTTCCTAAAACCCGCCGGACACGGAAGTGGCA	0	0	0	0	5	0	0	0	0	0	0	0	0	0	0	0	0	0	0	0	0	0	0	0	0	0	0	0	0	0	0	0	0	0	0	0	0	0	0	0
OTU_906	Chordata	Actinopteri	Cypriniformes	Cyprinidae	Barbus	Barbus barbus	99.265	Midori2	GCGGTCACACGATTAACCCAAGTCAATAGAAGCCGGCGTAAAGAGTGGTTAGGGATAAATAATAATAAAGCCAAATGGCCCCTTGGCCGTCATACGCTTCTAGGTGTCCGAGGCCCTATATACGAAAGTAGCTTTAATTGACCCGCCTGACCCCACGAAAACTGAGAAA	0	0	0	0	0	0	0	0	0	0	2	0	0	0	0	0	0	0	0	0	0	0	5	3	5	0	0	0	0	0	0	0	0	0	0	0	0	0	0	0
OTU_907	No Match	No Match	No Match	No Match	No Match	No Match	No Match	Midori2	AGCAGCATTATTCCGGCAAGTGATGATTTGGAACAAGGCATTTGAAGTATGCACTCCTGGTGCATCGCCTCTGAGCACCCCTGGTCAACGTTATGTTTGGTTCAAGTCTAAGGTCCCATCCAGGCCAGGTGAACTATGGGAAAAGTTTGATAAGAAATACAACTTCAATCATAG	0	0	0	0	0	0	0	0	0	0	0	0	0	0	0	0	0	0	0	0	0	0	0	0	0	0	0	0	0	1	0	0	2	0	0	0	0	9	0	0
OTU_908	No Match	No Match	No Match	No Match	No Match	No Match	No Match	Midori2	CTGTACTGGAACGAATACGGCGTGCCGGTATCTGATAACTTTGACGATGTGTACTACTCACAGGAGAATGGGCTCGACGAAGGTCGTCACGTTTTCCTGCAGGGCAACGATCTGCCGCAGCGCTGGCACAACCACCCGCAGCGGCATTTCTGTATCGG	0	0	0	0	0	0	0	0	0	0	0	0	0	0	0	0	0	0	0	0	0	1	0	7	0	0	0	0	0	0	0	0	0	0	0	0	0	0	0	0
OTU_909	Chordata	Actinopteri	Gobiiformes	Gobiidae	Neogobius		96.364	Midori2	TCGGTTATACGAGAGGCCCAAGTTGACAAAAATCGGCGAAAAGCGTGGTTAGTGATATCATCTTTATTAAAGCTAAATACCTTCAAGGCTGTAATACGCCCCCGAAGACAGGAAGCCCAATCACGAAAGTAGCTTTAATTTTCATGAAGCCACGAAAGCTAGGAAA	0	0	0	0	0	0	0	0	0	0	0	0	0	0	0	0	0	0	0	0	0	0	0	0	0	0	0	0	0	0	0	0	0	0	0	0	0	0	0	0
OTU_910	No Match	No Match	No Match	No Match	No Match	No Match	No Match	Midori2	CGGCCTGGGAATTTCGAGACTTCGGAAACCCGGCGCCGCCGGGTCTCTTACGTCGTTAGCACCCGCAGGGAGCGAGTGCTAGCAGTCGAATTATATGGGCGGGTGTGACGCTTTCAAGTCCCTAGTCTCTTCAGTTGGGCGCTTTTGTCGTTCTTGTTTGC	0	0	0	0	0	0	0	0	0	0	0	0	0	0	0	0	0	0	5	1	0	0	0	0	0	0	0	0	0	0	0	0	0	0	0	0	0	0	0	0
OTU_911	Arthropoda	Malacostraca	Decapoda				89.583	Midori2	GCGGTAATACAGAGGGTGCAAGCGTTAATCGGAATTACTGGGCGTAAAGCGCGCGTAGGCGGTTACGTAAGTTGGACGTGTAGCGGTGAAATGCGTAGATATCTGGAGGAATACCGATGGCGAAGGCAGCCTTCTGGCCTAACACTGACGCTGAGGTGCGAAAGCATGGGGAG	0	0	0	0	0	0	0	0	0	0	0	0	0	0	0	0	0	0	0	0	0	0	0	0	0	0	0	0	0	0	0	0	0	0	0	0	0	0	0	0
OTU_912	No Match	No Match	No Match	No Match	No Match	No Match	No Match	Midori2	ATCAATGAATCTTCCGACGAGATGGCGTTATGCAAGGCCTTGTGCGGATAGGACTTGAACAGGTTATTTCTACCCAGCTCCTCACTGATGGCAATTTTCAGGGCAGGGAAGCCTTTCATACCGATTTTCTGGCTAAACTTGACGATGGCTGACTGGCTGACCCCCGCATCTTCAG	0	0	0	0	0	0	0	0	0	0	0	5	0	0	0	0	0	0	0	0	0	0	0	0	0	0	0	0	0	0	0	0	0	0	0	0	0	0	0	0
OTU_913	No Match	No Match	No Match	No Match	No Match	No Match	No Match	Midori2	AGCAGCATTATTCCGGAAATTGATGATTTGGAACAAGGCATTTGAAGTATGCACTCCTGGTGCATCGCCTCTGAGCACCCCTGGTCAACGTTATGTTTGGTTCAAGTCTAAGGTTCCATCCGGGCCAGGTGAGCTATGGTAAAAGCTTGATAAGATATACAACTTCAATCATAG	0	0	0	0	5	0	0	0	0	0	0	0	0	0	0	0	0	1	0	0	0	0	0	0	0	0	0	0	0	0	0	0	0	0	0	0	0	0	0	0
OTU_914	Chordata	Actinopteri	Cypriniformes	Cyprinidae	Cyprinus	Cyprinus carpio	100	manual check	GCGGTTAGACGAGAGGCCCTAGTTGATATTACAACGGCGTAAAGGGTGGTTAAGGATAAACAAAAATAAAGTCAAATGGCCCCTTGGCCGTCATACGCTTCTAGGAGTCCGAAGCCCTAATACGAAAGTAACTTTAATAAACCCACCTGACCCCACGAAAGCCAGGGCC	125	185	226	256	824	268	387	182	216	231	242	486	261	323	389	325	334	258	275	174	60	0	39	66	120	151	100	123	228	193	222	208	210	243	107	125	135	233	328	0
OTU_915	Chordata	Actinopteri	Anguilliformes	Anguillidae	Anguilla		95.266	Midori2	GCGGTTATACGAGGGGTTCAAATTGATATTACACGGCGTAAAGCGTGGTTAAGATTAAAGACAAAACTAAAGCCAAACACTTCCCAAGCTGTCATACGCTACCGGAACATAAACGAAGCCCTATAACGAAAGTAGCTTTAACACCTTTGAACTCACGACAGTTGAGGAA	0	4	0	0	0	0	0	0	0	0	0	0	0	0	0	0	0	0	0	0	0	0	0	0	0	0	0	0	0	0	0	0	0	0	0	0	0	0	0	0
OTU_916	No Match	No Match	No Match	No Match	No Match	No Match	No Match	Midori2	CCCGACAATGATCACGTCATAGGTTTTTTTCGGTTGCGGGTCTCGCCAAGCCCGCTCCCAATGTTGGTGTCCAGTGAGCGCATTGCGCAACAAAGACCATGCCGAGTAATGAGACATCAGGACAGCTCCTACATGCGCATGCGCAAAGCCTTGGGAT	0	1	0	0	7	0	0	0	2	0	0	0	0	0	0	0	0	0	0	0	0	0	0	0	0	0	0	0	0	0	0	0	0	0	0	0	0	0	0	0
OTU_917	No Match	No Match	No Match	No Match	No Match	No Match	No Match	Midori2	AGCGCTGCGATCATCGCCAGGCCAACCAAGTCACTCGTGTTGTTCAATCAAATGGTCGGGCGCGCGATTCGAGGACCCCGGGCGGGTGGAAACGTAGCTGCCGAGGTCTACGTGGTTCAGGATTCGCAGATTCCAGCCTTCAGAGACATTGCTTCTGCCTTCA	0	0	0	0	0	0	0	0	0	0	0	0	0	0	0	0	0	0	0	0	0	0	0	0	0	0	0	0	0	0	5	0	0	0	0	0	0	0	0	0
OTU_918	No Match	No Match	No Match	No Match	No Match	No Match	No Match	Midori2	TGCCAGGTTCGCAGTCTTTATGGAAGGATGATGTTCATGATGTTGTATGTAGTTTGTCATTAATTGATTTTGGGCATGTGGCTCAATGCACCAACTTGTCGGCCTGCTTAACCCCTTGGGACATTGCCTCAAATGCTTTCGACGGCGTCAGCTTTTCAAGTCACTTG	0	0	0	0	0	0	0	0	0	0	0	0	0	0	0	0	0	0	0	0	0	0	0	0	0	0	0	0	0	0	6	0	0	0	0	0	0	0	0	0
OTU_919	Chordata	Actinopteri	Perciformes	Percidae	Sander		96.97	Midori2	GCGGTTATACGAGAGGCCCTAGTTGATAATTGTCGGCGTAAAGCGTGGTTAAGACAAAAACAAAACTAAAGCCGAACACCTTCAGAGCTGTTATACGCACCCGAAGGTAAGAAGTTCAACCACGAAAGTGGCTTTATTACCCCTGAACCCACGAAAGCTACGATA	0	0	5	0	0	0	1	0	0	0	0	0	0	0	0	3	0	0	0	0	3	0	0	2	0	0	1	0	0	0	3	6	0	0	0	0	0	3	0	0
OTU_920	Chordata	Actinopteri	Perciformes	Percidae	Perca		96.988	Midori2	GCTGTTATACGAGAGGCCCAGGTTGATAGACATCGGCGTAAAGCGTGGTTAAGATTAATACAATACTAAAGCCGAACACCTTCAGAGCTGTTATACGCATCCGAAGGTAAGGAGTTCAACCACGAAAGTGGCTTTATAGCCCCTGAACCCACGAAAGCTACGATA	1	5	4	1	0	2	1	3	1	2	1	4	2	0	2	0	2	1	5	1	0	2	0	0	0	1	1	0	2	1	3	2	0	0	2	2	4	0	0	0
OTU_921	Chordata	Actinopteri	Perciformes	Percidae	Perca	Perca fluviatilis	98.125	Midori2	GCGGTTATACGATAGGCCCAAGTTGATAGACATCGGCGTAAGGCGTGGTTAAGATTAAAGACAATACTAAAGCCGAACACCTTCAGAGCTGTTATACACATCCGAAGGTAAGAAGTTCAACCACGAAAGTGGCTTTATAGCCCCTGAACCCACGAAAGCTGAGGAA	0	0	0	0	0	0	1	0	0	0	0	0	2	1	1	1	0	1	1	1	0	0	0	0	0	0	0	0	1	0	0	2	0	0	0	0	0	0	0	0
OTU_922	Chordata	Actinopteri	Cypriniformes	Leuciscidae	Leuciscus		95.181	Midori2	GCGGTTAAACGAGAGGCCCTAGTTAATAATACACGGCGTAAAGGGTGGTTAAGGAGAGCATAGCAATAAAGCCGAATGGCCCTTTGGCTGTCATACGCTTCTAGGAGTCCGAAGCCCTAATAATAAAAGTAACTTTAATAAACCCACCTGACCCCACGAAAGCTACGATA	0	0	0	0	0	0	0	0	0	0	0	0	3	0	0	1	1	0	0	0	0	0	0	0	0	0	0	1	0	0	0	0	0	0	0	0	0	0	0	0
OTU_923	No Match	No Match	No Match	No Match	No Match	No Match	No Match	Midori2	GCTCGTTCAACCTCATTCACCTCGACTCGATGTTCAAGGTCGATGTCTTCATTCCCGCACCCGTCGGGTTTCGGCGAGAGCAGTTGCGCCACCGCCGGAGCGAAGCCATCACCCCGCAGCCGGCGCAGTCGGTCTATCTCGCAACAGCCGAAGATACGATCCTTGC	0	0	0	0	0	0	0	0	0	0	0	5	0	0	0	0	0	0	0	0	0	0	0	0	0	0	0	0	0	0	0	0	0	0	0	0	0	0	0	0
OTU_924	Chordata	Actinopteri	Cypriniformes	Leuciscidae	Leuciscus	Leuciscus aspius	98.246	Midori2	GCGGTTAAACGAGAAGCCCTAGTTAATAATACACGGCGTAAAGGGTGGTTAAGGAAACATAACAATAAAGTCGAATGGCCCCTTGTCTGTCATACGCTTCTAGGTGTCCGAAGCCCAATATACGAAAGTAGCTTTAATAAGGCCCACCTGACCCCACGAAAGCTGAGGAA	0	4	0	1	0	1	0	0	0	4	3	10	0	0	10	8	0	1	5	1	0	0	0	5	2	9	0	10	0	0	0	1	0	3	2	10	1	0	0	0
OTU_925	Chordata	Actinopteri	Perciformes	Percidae	Sander		96.97	Midori2	GCGGTGATACGAGAGGCCCAAGTTGATAGACGTCGGCGTAAAGCGTGGTTAAGACAAAAACAAAACTAAAGCCGAACACCTTCAGAGCTGTTATACGCACCCGAAGGTAAGAAGTTCAACCACGAAAGTGGCTTTATTACCCTTGAACCCACGAAATCTGCGATA	29	65	5	11	13	3	13	26	10	5	47	12	13	1	7	13	13	40	11	12	8	0	1	2	5	4	13	9	1	18	8	3	15	2	30	31	29	4	0	0
OTU_926	Chordata	Actinopteri	Cypriniformes	Leuciscidae	Abramis	Abramis brama	98.649	Midori2	CTGTAAATTCGTGCCAGCTACCGCGGTTAAACGAGAGGCCCCAGTTAATAATACACGGCGTAAAGGGTGGTTAAGGAAAGTATTAACAATAAAGCCGAATGGCCCTTTGGCTGTCATACGCTTCTAGGTGTCCGAAGTTCAACATACGAAAGCTGAGAAA	0	1	1	0	1	5	1	0	1	0	0	2	1	1	2	0	3	2	1	1	1	0	0	1	0	0	3	3	4	1	2	0	3	2	0	0	0	0	0	1
OTU_927	Chordata	Actinopteri	Anguilliformes	Anguillidae	Anguilla	Anguilla anguilla	99.286	Midori2	GCGGTAAGACGGAGGATGCAAGTGTTATCCGGAATCACTCGGCGTAAAGCGTGATTaaaaaacaaaaaaaCTAAAGCCAAACACTTCCCAAGCTGTCATACGCTACCGGAACATAAACGAAGCCCTATAACGAAAGTAGCTTTAACACCTTTGAACTCACGACAGTTGAGGAA	0	0	0	0	0	0	0	0	0	0	0	0	0	0	0	0	0	0	0	0	0	0	0	0	0	0	0	0	0	0	0	0	0	0	0	0	0	0	0	0
OTU_928	Chordata	Actinopteri	Cypriniformes	Cyprinidae			94.737	Midori2	GCGGTTAGACGAGAGGCCCTAGTTGATATTATAACGGCGTAAAGGGTGGTTAGGGATAAATAATAATAAAGCCAAATTGCCCCTTGCCGTCATACGCTTCTAGGTGTCCGACCCCTATATACGAAAGTAGCTTTAATAACGCCCACCTGACCCCACGAAAGCTGAGAAA	0	0	0	3	0	1	1	0	1	0	0	3	4	2	0	5	0	1	0	2	0	0	3	1	3	1	1	2	2	4	2	1	1	2	0	0	0	5	0	0
OTU_929	Chordata	Actinopteri	Perciformes	Percidae	Perca		95.092	Midori2	GCGGTTATACGAGGGGCTCAAATTGATAGACATCGGCTAAAGCGTGGTTAAGATTAAAGACAATACTAAAGCCGAACACCTTCAGAGCTGTTATACGCATCCGAAGGTAAGAAGTTCAACCACGAAAGTGGCTTTATCTAACCTGAACCCACGAAAGCTACGGCA	1	1	0	2	0	3	3	0	1	0	2	0	3	1	6	5	1	2	3	0	0	0	2	3	0	0	2	1	3	0	1	2	3	0	1	3	6	3	0	0
OTU_930	Chordata	Actinopteri	Cypriniformes	Leuciscidae			90.698	Midori2	GCGGTTAAACGAGAGGCCCCAGTTAATAATACACGGCGTAAAGGGTGGTTAAGGAAAGTATTAACAATAAAGCCGAATGGCCCTTTGGCTGTCATACGCTTCTAGGTGCCCGAAAGTAGCTTTAATAAAGCCCACCTGACCCCACGAAAGCTGAGAAA	0	0	0	0	0	0	0	0	0	0	0	0	0	0	1	0	0	0	0	0	0	0	0	0	0	0	0	0	0	0	0	0	0	0	0	0	0	0	0	0
OTU_931	Ascomycota	Pezizomycetes					75.182	Midori2	GCGGTAATACGAGTGGTGCAAACGTTATTCGGAATCACTGTGTGGCTCGAGGGAGACAGAGGTGAGCGGAACTGATGGTGGAGCGGTGAAATGCGTTGATATCATCAGGAACACCGGTGGCGAAAGCGGCTCACTGGGTCTTTTCTGACGCTGAGGCACGAAAGCTAGGGGAG	0	0	0	0	0	0	0	0	0	0	0	0	0	0	0	0	0	0	0	0	0	0	0	0	0	0	0	0	0	0	0	0	0	0	0	0	0	0	0	0
OTU_932	Chordata	Actinopteri	Cypriniformes	Leuciscidae	Leuciscus		96.403	Midori2	GCGGTTAAACGAGAGGCCCCAGTTAATAATACACGGCGTAAAGGGTGGTTAAGGAAGGCACAATAATAAAGCCAAATGGCCCTTTGGCTGTCATACGCTTCTAGGTGTCCGAAGTTCAACATACGAAAGTAGCTTTAATTTTCATGAAGCCACGAAAGCTAGGAAA	3	1	3	0	3	4	1	2	4	6	2	1	6	3	5	14	4	3	5	6	3	4	5	0	2	0	18	10	3	0	5	4	11	8	6	4	1	8	0	0
OTU_933	Chordata	Actinopteri	Gobiiformes	Gobiidae	Neogobius		95.181	Midori2	GCGGTTATACGAGAGGCCCAAGTTGATAGACATCGGCGTAAAGCGTGGTTAATGATATCACCTCCACTAAAGCCAAACACCTTCAAGGCTGTAGTACGCCCCCGAAGACAGGAAGCCCAATCACGAAAGTAGCTTTAATTTCCATGAAGCCACGAAGGCTAGGAAA	11	23	7	6	8	8	29	4	4	7	4	15	21	11	15	24	22	15	3	10	0	9	13	7	16	8	14	14	17	9	4	4	15	9	7	10	7	3	0	0
OTU_934	No Match	No Match	No Match	No Match	No Match	No Match	No Match	Midori2	AGCGGCCTGACTCACAGGCTTTGGCATTCAGTTCAACCATTTCATTGCCGCTTTTCTGCATGCTTCGACCGTTTTTGCGTCAGGCATGCTGCCGTTTGCGGAATCCTCGTCTGTGGTCACTTCCCCATTTGCCTCGACCCAAAAACCCCATCCGCTGTCGTCGTATTTTGTCG	0	0	0	0	0	0	0	0	0	0	0	0	0	0	0	0	0	0	0	0	0	0	0	0	0	0	0	0	0	0	0	0	0	0	0	5	0	0	0	0
OTU_935	No Match	No Match	No Match	No Match	No Match	No Match	No Match	Midori2	AGTCGAGGGCACTCGAGTATAGTTCCTGCTCTACTTCGCCGTATAGGAAGGCTTGAGAAGTGTCGTAATGGAAAGCCTCGGCCCCAGCGCTCGCCACAATGGCCATAATTAGCCTAAATTCCGCTGGCTTCTGACCTGTAGCATACATGTCACGTGCGT	0	0	0	0	0	0	0	0	0	0	0	0	0	0	0	0	0	0	0	0	0	0	0	0	0	5	0	0	0	0	0	1	0	0	0	0	0	0	0	0
OTU_936	No Match	No Match	No Match	No Match	No Match	No Match	No Match	Midori2	GACACGCTTCTTAAGGGAATAGGCATATGGCCCGGTGCGCAACATATCCAGGTCGTGGTTACATTCTAATAATAAGCCATCACATCCCTGAAGCATGGCGACAATGTGTGGAGTCACACTGCCGACATCCGTCAACACGCCAAACTTGCGTGCCCCATCACCAAACA	0	0	0	0	0	0	0	0	0	0	0	0	0	0	0	0	0	0	0	0	0	0	0	0	0	0	0	0	0	0	0	6	0	0	2	0	0	0	0	0
OTU_937	Chordata	Actinopteri	Gobiiformes	Gobiidae			92.169	Midori2	GCGGTCACACGATTAACCCAAGTCAATAGAAGCCGGCGTAAAGCGTGGTTAGTGATATCACCTCCACTAAAGCCAAACACCTTCAAGGCTGTAATACGCCCCCGAAGACAGGAAGCCCAATCACGAAAGTAGCTTTAATTTTCATGAAGCCACGAAAGCTAGGAAA	0	0	0	1	0	0	0	1	0	1	0	1	0	0	3	1	0	0	1	1	1	0	8	4	3	4	0	0	1	0	0	0	0	1	0	0	0	0	0	0
OTU_938	Chordata	Actinopteri	Gobiiformes	Gobiidae	Neogobius		96.386	Midori2	GCGGTTATACGAGAGGCCCAAGTTGACAAAAATCGGCGAAAAGCGTGGTCAGTGATATCGCCTCCACTAAAGCCGAACACCTTCAAGGCTGTAGTACGCCCCCGAAGACAGGAAGCCCAATCACGAAAGTAGCTTTAATTTTCAGGAAGCCACGAAGGCTAGGAAA	0	0	0	0	0	0	0	0	0	0	0	0	0	0	0	0	0	0	0	0	0	0	0	0	0	0	0	0	0	0	0	0	0	0	0	0	0	0	0	0
OTU_939	No Match	No Match	No Match	No Match	No Match	No Match	No Match	Midori2	ATGGCGTGACGATCATCTCTATCCGTGCCGGCTCCGATGATGTCCCATGGGGTCTCGACTACAGGAAAAACCATGAAACCCACAGCACCCGTTCCTTTTGAAATCCATTTTCGTCATCTGGCCCACTCCGAGGCCATTGAGACACACATACGCCACCAAGTCGA	4	1	0	0	0	0	0	0	0	0	0	0	0	0	0	0	0	1	0	0	0	0	0	0	0	0	0	0	0	1	1	0	0	0	0	0	0	0	0	0
OTU_940	No Match	No Match	No Match	No Match	No Match	No Match	No Match	Midori2	CGCGCCATCATCCCGACTATAGTGGTTCCAAACATCGTTGGTCGTGAATCCCACCACCGCCAGCCCTTCTTTGATCACACCTGCCGACGGACTCTGGTGCGCATAGAAGTTCACCGAAATCAGGAAAGCGTCGGATGAAATCACTTCCAGAACCGCGTTGGAACTGACCGCCACAC	0	0	0	0	0	0	0	0	4	0	0	0	0	0	0	0	0	0	0	0	0	0	0	0	0	0	0	0	0	0	0	0	0	0	0	0	0	0	0	0
OTU_941	No Match	No Match	No Match	No Match	No Match	No Match	No Match	Midori2	TGTTTTTCAAAAGCGCCGTTCACGACGAGAGCGGACCAGCCGCCGCCTTCCGACTGCGCAATGCGGGCGAGTGTAGCAGGCATAGTTTTTACCTCAAGATTAAGAACGCCATGGCAGTTTTCTTCCGGCGCTGCCCCTGCCGCAGGCAAAATGCTGTGGGGAGA	0	0	0	0	0	0	0	0	0	0	0	0	0	0	0	0	0	0	0	0	0	0	0	0	0	0	0	0	0	0	0	0	0	0	0	6	0	0	0	0
OTU_942	Chordata	Actinopteri	Gobiiformes	Gobiidae			94.245	Midori2	GCGGTTATACGAGAGGCCCAAGTTGACAAAAATCGGCGAAAAGCGTGGTTAGTGATATCACCTCCACTAAAGCCAAACACCTTTAAGGCTGTTATACGCCCCCAAAGGTAGGAAGACCCCTCACGAAAGTAGCTTTAATACCTTTGAACTCACGACAGTTGAGGAA	0	0	0	0	0	0	0	0	0	0	0	0	0	0	0	0	0	0	0	0	0	0	0	0	0	0	0	0	0	0	0	0	0	0	0	0	0	0	0	0
OTU_943	No Match	No Match	No Match	No Match	No Match	No Match	No Match	Midori2	TTTACAGATTCACAGGTCTTGCCTTCGTCTCAGAGAACCGTGTTCAGCAAGTCACCCAGAGAGGGCATTAAGAGCCCTTCTTCCACGGGAACGCTCGGCCCGGGAGCTTACGAACTGCCTTCGTCGCTCAGAGATTCTCCTTCCTATTCCCTCAAGGCGAGGCCGATGAATCCCGA	0	0	0	0	0	0	0	0	0	0	0	0	0	0	0	0	0	0	0	0	0	0	0	1	0	0	0	0	0	0	0	0	0	0	0	0	5	0	0	0
OTU_944	Chordata	Actinopteri	Gobiiformes	Gobiidae	Neogobius		96.988	Midori2	GCGGTTATACGAGAGGCCCAAGTTGACAAAAATCGGCGAAAAGCGTGGTTATATATCACCTCCACTAAAGCCAAACACCTTCGAGGCTGTAATACGCCCCCGAAGACAGGAAGCCCAATCACGAAAGTAGCTTTAATCTTCATGAAGCCACGAAAGCTAGGAAA	4	6	6	11	4	2	3	6	3	4	6	7	10	5	5	8	4	4	6	4	22	15	6	10	6	5	7	10	4	4	5	9	7	8	4	4	4	5	0	4
OTU_945	Chordata	Actinopteri	Cypriniformes	Leuciscidae	Leuciscus		95.906	Midori2	GCGGTCATACGATTAACCCTAATTAATAATACACGGCGTAAAGGGTGGTTAAGGAAAGCATAACAATAAAGCCGAATGGCCCTTTGGCTGTCATACGCTTCTAGGTGTCCGAAGCCCAATATACGAAAGTAGCTTTAATAAAGCCCACCTGACCCCACGAAAGCTGAGAAA	1	0	1	0	1	0	0	1	1	1	0	0	0	2	0	0	0	0	0	2	0	0	0	0	0	0	0	0	0	0	2	1	3	0	0	2	3	1	0	0
OTU_946	No Match	No Match	No Match	No Match	No Match	No Match	No Match	Midori2	CGCCCGCAATCGCCCCGATCACCAGCCCGATATTGCTCGCCGACAGCGCCTGCCCCAGCACCTCGCGCGACAGCTTCAGCTCAGGCCCGAGGGCAGGCGCCGCCACCCCCATCGCCTGGATATCAAACCCCTCCACCACCATCACGGCAAAGCAAAGGCCCACCGCCAC	0	0	0	0	0	0	0	0	0	0	0	0	0	0	0	0	0	0	0	0	0	0	4	0	0	0	0	0	0	0	0	0	0	0	0	0	0	0	0	0
OTU_947	Ascomycota	Pezizomycetes					82.692	Midori2	GCGGTAATACGAGTAGTGCAAACGTTATTCGGAATCACTGGGCTTAAAGGGTGCGTAGGCGGCTACACAAGTCAGGTGTGAAATCCCTCGGCTCAACCGAGGAACTGCGCTTGAAACTGTGCGGCTCACTGGGTCTTTTCTGACGCTGAGGCACGAAAGCTAGGGGAG	0	0	0	0	0	0	0	0	0	0	0	0	0	0	0	0	0	0	0	0	0	0	0	0	0	0	0	0	0	0	0	0	0	0	0	0	0	0	0	0
OTU_948	Chordata	Actinopteri	Gobiiformes	Gobiidae	Neogobius		96.988	Midori2	GCGGTTATACGAGAGGCCCAGTTGACAAAAATCGGCGAAAAGCGTGGTTAGTAATATCACCTCCACTAAAGCCGAGCACCTTCAAGGCTGTAATACGCCCCCGAAGACAGGAGGCCCAATCACGAAAGTAGCTTTAATTTTCATGAAGCCACGAAAGCTAGGAAA	0	0	0	0	0	0	0	0	0	0	0	1	0	0	0	0	0	0	0	0	0	0	2	0	0	0	0	0	0	0	1	0	0	0	4	0	0	0	0	0
OTU_949	No Match	No Match	No Match	No Match	No Match	No Match	No Match	Midori2	GCACCTGAACGCCCGCATGGGCCTGACGCGCACCTTCCAGATCGTGCAGCCTTTTGCCGCGCAAACGGTGCGTGAAAACATCGCGGTGGGGGCGCACCTGCATTTGCCGCGCCGCGCCCAGGCGCTGGAATTTGCCGAATCGGTGGCCAGCCAAGTGGGCTTGACGCCCCAACTCGA	0	0	0	0	0	0	0	0	0	0	0	0	0	0	4	0	0	0	0	0	0	0	1	0	0	0	0	0	0	0	0	0	0	0	0	0	0	0	0	0
OTU_950	No Match	No Match	No Match	No Match	No Match	No Match	No Match	Midori2	GAAATCCTCGTGACTTCCGGCGCTACGCAAGGTATTTTCACTACGATTCAGGCGCTCATCCATGCAGGAGAGGAGGTCATTATCCTCGATCCGGCTTACGATTGCTACGCGCCCGCGGTGGTGCTCACAGGCGCGAAGCCCGTGCATATCAACATGAATCCCGATTTTACGC	0	0	0	0	0	0	0	0	0	0	0	0	0	0	0	0	0	0	0	0	4	0	0	0	0	0	0	0	0	0	0	0	0	0	0	0	0	0	0	0
OTU_951	Chordata	Actinopteri	Perciformes	Percidae			93.333	Midori2	GCGGTCACACGATTAACCCAAGTCAATAGAAGCCGGCGTAAAGCGTGGTTAAGACAAAAACAAAACTAAAGCCGAACACCTTCAGAGCTGTTATACGCACCCGAAGGTAAGAAGTTCAACCACGAAAGTGGCTTTATTACCCCTGAACCCACGAAAGCTACGATA	0	0	0	0	0	0	0	1	0	0	0	1	0	0	0	0	0	1	2	3	0	0	0	0	2	1	0	0	0	0	1	0	0	0	1	0	0	1	0	0
OTU_952	No Match	No Match	No Match	No Match	No Match	No Match	No Match	Midori2	ATTTGGGCTGTCAATAGAGATATTCATCCTCTCGGGATAGTAATGAAGATTGGCACCTGTAAACAAGGTGGTGTAATACAGAGGCACATAGACGTTATAAGTGGCTGGCTGCAGAGGTTCTACAGACCAGGCATCTTCTGGATCGCATAGCATCGATCTTGCCATGCTGT	0	0	0	0	0	0	0	5	0	0	0	0	0	0	0	0	0	0	0	0	0	0	0	0	0	0	0	0	0	0	0	0	0	0	0	0	0	0	0	0
OTU_953	Chordata	Actinopteri	Perciformes	Percidae	Perca		96.386	Midori2	GCGGTTATACGAGAGGCCCAAGTTGATAGACATCGGCGTAAAGCGTGGTTAAGATTAAAGACAATACTAAAGCCGAACACCTTCAGAGCTGTTATACGCATCCGAAGACAGGAAGCCCAATCACGAAAGTGGCTTTATAGCCCCTGAACCCACGAAAGCTACGATA	7	0	0	0	0	0	0	0	0	0	0	0	0	0	0	0	0	0	2	0	0	0	0	0	0	0	0	0	0	0	0	0	0	0	0	1	0	0	0	0
OTU_954	No Match	No Match	No Match	No Match	No Match	No Match	No Match	Midori2	CCGTTAACTTGTTCTAGTGGTGGTAACCTAACAGCCTCTGGAAACGTAACAGCTTACTCTGACTTGCATCTTAAGAAAGACTTAGTACAAATTGAAAAAGCCTTAGATAAGCTTAAAACTCTAACTGGATATACTTACACTCGTATAGATACAGGAGAGCGC	0	0	0	0	0	0	0	0	0	0	0	0	0	0	0	0	0	0	1	0	8	0	0	0	0	0	0	0	0	0	0	0	0	0	0	0	0	0	0	0
OTU_955	Chordata	Actinopteri	Cypriniformes	Leuciscidae	Leuciscus	Leuciscus leuciscus/idus	99.363	manual check	AAGCAAGCACACACGGGCCCTCGTTAATAATACACGGCGTAAAGGGTGGTTAAGGAAAGCATAACAATAAAGCCGAATGGCCCTTTGGCTGTCATACGCTTCTAGGTGTCCGAAGCCCAATATACGAAAGTAGCTTTAATAAAGCCCACCTGACCCCACGAAAGCTGAGAAA	0	0	0	0	0	0	0	0	0	0	0	0	0	0	0	0	0	0	4	0	0	0	0	0	0	0	0	0	0	0	0	0	0	0	0	0	0	0	0	0
OTU_956	Chordata	Actinopteri	Cypriniformes	Leuciscidae	Squalius	Squalius cephalus	97.576	Midori2	GCGGTTAAACGAGAGGCCCTAGTTAATAATACGCGGCGTAAAGGGTGGTTAAGGAAAACATAACAATAAAGCCGAATGGCCCTTTGGCTGTCATACGCTTCTAGGTGTCCGGAGCCCAATATACGAAAGTAGCCTTAATAAAGTCCACCTGACCCCACGAAAGCTACGGCA	14	9	12	8	9	19	4	1	6	11	6	12	5	15	4	6	3	9	7	11	1	0	11	22	3	5	8	8	27	8	8	7	6	9	17	11	25	18	0	0
OTU_957	Chordata	Aves	Columbiformes	Columbidae	Columba		96.61	Midori2	GCGGTTATACGAGAGGCCCAAGCTAATCGTTCACGGCGTAAAGAGTGGACTCATGCTTATCACATTAATTAAGGTCAAAACGCAGCTGAGCTGTCATAAGCTTAAGGTGCACTTAAAACCGCCCTAAATACGACCCTAAACTCATACGACTCAATGAACTCCACGAAAGCCAGGGTA	1	0	4	1	1	0	0	0	0	1	0	0	0	60	0	0	1	0	0	1	0	0	0	0	0	0	1	0	0	0	0	0	0	0	1	0	0	0	0	0
OTU_958	Chordata	Actinopteri	Cypriniformes	Leuciscidae	Leuciscus	Leuciscus leuciscus/idus	99.39	manual check	GCGGTTAAACGAGAGGCCCTAGTTAATAATACACGGCGTAAAGGGTGGTTAAAGAAAGCATAACAATAAAGCCGAATGGCCCTTTGGCTGTCATACGCTTCTAGGTGTCCGAAGCCCAATATACGAAAGTAGCTTTAATAAAGCCCACCTGACCCCACGAAAGCCAGGGCC	3	0	3	2	0	4	0	0	5	3	0	0	0	3	2	5	1	3	0	0	1	1	1	0	0	1	1	3	3	0	0	1	5	4	1	0	1	0	0	0
OTU_959	No Match	No Match	No Match	No Match	No Match	No Match	No Match	Midori2	TCAGCTCTTCTTGAGTGCGGTGTTCCACCCTTTTACCCGCAAATTTACTTGGCCCCTTGTGTTCGTCTTCAAATGCTCTCCTGGCTCGTTTATCCATTGCCCGTCTGTTCTCTCGAATCTGGCTATTGGTTTGCTTCTCCAGTTCGCTTTTGCACATTCT	0	0	0	0	0	0	4	0	0	0	0	0	0	0	0	0	0	0	0	0	0	0	0	0	0	0	0	0	0	0	0	0	0	0	0	0	0	0	0	0
OTU_960	No Match	No Match	No Match	No Match	No Match	No Match	No Match	Midori2	CAGATCGCAATCAACGCCGGCAATGGCCGCGCGGCTAATATCGTCGTGCTGGGGGCATTTGTCGGAGCGACCGGAATAGTCAAGTACGAAACGCTGGTTGCCGTGGTCGAAGAGAAACTGGGAAAGAAGAAAGAGCTGCTCGAAGTAAACCGTCGGGTGCTGGAGATGGGCTA	0	0	0	0	0	0	0	0	0	0	0	0	0	0	0	0	0	0	0	0	0	0	0	0	0	0	0	0	0	4	0	0	0	0	0	0	0	0	0	0
OTU_961	Chordata	Mammalia	Rodentia	Myocastoridae	Myocastor	Myocastor coypus	97.561	Midori2	GCGGTCATACGATTAACCCTGATTAATAAACCCCGGCGTAAAGAGTATTAAAGATACAATAAAAATAAGATTAAATTTCATCTGGGTCGTAAAAAACTATAGATAAAAATAGAATCGATAACGAAGGTAATCTTGATATATCAGAGTACACTAAAGCTAAGACA	0	3	0	3	1	0	0	0	0	1	0	0	1	2	0	0	0	0	0	0	0	0	329	2	0	0	0	0	0	0	0	0	0	0	0	0	0	0	0	0
OTU_962	No Match	No Match	No Match	No Match	No Match	No Match	No Match	Midori2	CAGGCATCCGCGCACTGCTGGGCGTGCGCCCCCACCACATCCACAATAAAGTCAGCTGGGTTGACCATGGGTGGCAGGCACCTGCCCAGCACGCCCTCAAAGTGAGGCAGCGCGCCAGCCACTGGGCCACAGTAGGCCAGGCGCCCCCCTTTGGCCAGCAGCAGCAGGTCAT	0	0	0	0	0	0	0	0	0	0	0	0	0	0	0	0	0	0	0	0	0	0	0	4	0	0	0	0	0	0	0	0	0	0	0	0	0	0	0	0
OTU_963	No Match	No Match	No Match	No Match	No Match	No Match	No Match	Midori2	CCAGTGGAAGGAGATCTATTGGGTGGGGTTGGATTCGAACAATCACCATCCCAGTCACATGCAACCAGTTTCGACGCAAGCAACAGTATGCCGGAGGAAAAGCCCATCACTCTCGATTCCAACAACTTGCCATCCGAAGGTGAATACTATGAGGTACGCATCGCTGCACG	0	0	0	0	0	0	0	0	0	0	0	0	0	0	0	0	0	0	0	0	0	0	0	0	0	0	0	6	0	0	0	0	0	0	0	0	0	0	0	0
OTU_964	Chordata	Mammalia	Rodentia	Cricetidae	Microtus	Microtus arvalis	98.113	Midori2	GCGGTCATACGGTTAACCCAAACTAATTATTCTCGGCGTAAAACGTGTTACTAGAAATATGCAAAATAGGATTAAAATCCATCCAATATGTGAAAACTCATCGCTGGACCTAAAACCAATGACGAAAGTAATTCTAATAAGCCTGATACACGATAGCTAGGAAA	0	0	0	0	0	0	0	1	0	6	0	0	0	0	0	0	0	0	4	0	0	0	0	0	0	0	0	0	0	0	1	0	0	0	0	0	0	0	0	0
OTU_965	Chordata	Actinopteri	Cypriniformes	Leuciscidae	Leuciscus	Leuciscus leuciscus	97.076	Midori2	GCGGTTAAACGAGAGGCCCTAGTTAATAATACACGGCGTAAAGGGTGGTTAAGGAGAGCATAATAATAAAGCCGAATGGCCCTTTGGCTGTCATACGCTTCTAGGTGTCTGAAGCCCAATATACAAAAGTAGCTTTAATAAAGCCCACCTGACCCCACGAAAGCTAGGAAA	0	0	1	1	0	0	0	0	0	0	0	46	3	1	1	1	0	2	0	0	1	1	0	0	0	0	0	0	0	0	1	3	0	2	0	0	0	0	0	0
OTU_966	Chordata	Actinopteri	Cypriniformes	Cyprinidae			91.228	Midori2	GCGGTTAGACGAGAGGCCCTAGTTGATATTATAACGGCGTAAAGGGTGGTTAGGGATAAATAATAATAAAGCCAAATGGCCCCTTGGCCGTCATACGCTTCTAGGTGTCCGAAGCCCAATAGCTTTAATAAAGCCCACCTGACCCCACGAAAGCTGAGAAA	0	0	0	0	0	0	0	0	0	0	0	0	0	0	0	0	0	0	0	0	0	0	0	0	0	0	0	0	0	0	0	0	0	0	0	0	0	0	0	0
OTU_967	Chordata	Mammalia	Rodentia	Cricetidae	Microtus	Microtus arvalis	98.758	Midori2	GCGGTCATACGATTAACCCAAACTAATTATTCTCGGCGTAAAACGTGTTACTAGAAATACGCAAAATAGAATTAAAATCCATCCAATATGTGAAAATTCATCGCTGGACCTAAAACCAATGACGAAAGTAATTCTAATAAGCCTGATACACAATAGCTAAGACC	0	0	0	0	0	1	0	6	1	9	1	0	0	0	0	0	0	0	5	0	0	0	0	0	0	0	0	0	0	0	0	0	0	0	0	0	0	0	0	0
OTU_968	Chordata	Actinopteri	Cypriniformes	Leuciscidae	Rutilus	Rutilus rutilus	100	Midori2	GCGGTCATACGATTAACCCAAGCTAACAGGAGTACGGCGTAAAGGGTGGTTAAGGGAAGCACAATAATAAAGCCAAATGGCCCTTTGGCTGTCATACGCTTCTAGGTGTCCGAAGCCCAATATACGAAAGTAGCTTTAATAAAGCCCACCTGACCCCACGAAAGCTGAGAAA	0	0	0	0	0	0	6	1	0	0	2	0	0	1	0	0	0	2	0	0	3	2	1	0	1	0	0	0	0	0	0	0	1	0	0	0	0	0	0	0
OTU_969	Chordata	Actinopteri	Perciformes	Percidae	Perca		96.988	Midori2	GCGGTTATACGAGAGGCCCAAGTTGATAGACATCTGCGTAAAGCGTGGTTAAGATTAAAGACAATACTAAAGCCGAACACCTTCAGAGCTTTTATACGCTCCGAAGGTAAGAAGTTCAACCACGAAAGTGGCTTTATTACCCCTGAACCCACGAAAGCTACGATA	0	0	0	0	0	0	0	0	1	0	0	0	0	0	0	0	0	0	1	0	0	0	0	0	0	0	0	0	0	0	0	0	0	0	0	0	0	0	0	0
OTU_970	Chordata	Actinopteri	Cypriniformes	Leuciscidae	Abramis		96.512	Midori2	GCGGTTAAACGAGAGGCCCCAGTTAATAATACACGGCGTAAAGAGTGGTTAAGGAAAGTATTAACAGTAAAGCCGAATGGCCCTTTGGCTGTCATACGCTTCTAGGTGTCCGAAGTTCATACGAAAGTAGCTTTAACAACGCCCACCTGACCCCACGAAAGCTGAGAAA	0	0	2	4	3	4	1	1	0	1	1	3	1	1	1	3	1	2	4	1	2	1	5	4	1	3	4	0	0	0	1	3	0	5	2	8	0	1	0	4
OTU_971	Chordata	Actinopteri	Perciformes	Gasterosteidae			92.593	Midori2	GCGGTTAGGCGAGAGGCCCTAGTTGATGAGTTACGGCGTAAAGAGTGGTTAAGCTAAAATTAAAACTAAAGCCGAACACCCCCAAAGCTGTTATACGCATCCGAAGGTAAGAAGTTCAACCACGAAAGTGGCTTTATAGCCCCTGAGCCCACGAAAGCTACGATA	1	3	2	2	0	1	2	0	0	0	1	0	9	5	3	2	2	1	1	1	0	1	3	2	0	1	2	0	0	1	0	0	3	4	5	0	7	3	0	0
OTU_972	Chordata	Actinopteri	Cypriniformes	Cyprinidae			94.286	Midori2	GCGGTTAGACGAGAGGCCCTAGTTGATATTATAACGGCGTAAAGGGTGGTTAGGGATAAATAATAATAAAGCCGAATGGCCCTTTGGCTGTCATACGCTTCTAGGTGTCCGAAGTTCAACACACGAAAGTAGCTTTAATTTTCATGAAGCCACGAAAGCTAGGAAA	0	0	0	0	0	0	0	0	4	0	0	0	1	2	0	1	1	0	0	1	0	0	0	1	0	0	0	0	0	1	0	0	0	0	0	0	0	0	0	0
OTU_973	Chordata	Mammalia	Artiodactyla	Suidae	Sus		96.988	Midori2	GCGGTCATACGATTAACCCAAACTAATTATTCTCGGCGTAAAGAGTGTTTAAGaaaaaaaaaCCACAATAGAGTTAAATTATAACTAAGCTGTAAAAAGCCCTAGTTAAAATAAAATAACCCACGAAAGTGACTCTAATAATCCTGACACACGATAGCTAGGACC	0	0	0	0	0	0	0	0	0	4	0	0	0	0	0	0	0	0	0	0	0	0	0	0	0	0	0	0	0	0	0	0	0	0	0	0	0	0	0	0
OTU_974	Chordata	Mammalia	Rodentia	Cricetidae	Microtus		96.855	Midori2	GCGGTCATACGATTAACCCAAACTAATTATTCTCGGCGTAAAACGTGTTACTAGAAATATGCAAAATAGAATTAAAATCCATCCAATAAAAAATTCATCGCTGGACCTAAAACCAATGACGAAAGTAATTCTAATAAGCCTGATACACGAAAGCTAGGAAA	0	0	0	0	0	0	0	0	0	0	0	0	0	0	0	0	0	0	0	0	0	0	0	0	0	0	0	0	0	0	1	0	0	0	0	0	0	0	0	0
OTU_975	Chordata	Actinopteri	Cypriniformes	Leuciscidae			94.22	Midori2	GCGGTTAGACGAGAGGCCCTAGTTGATATTACAACGGCGTAAAGGGTGGTTAAGGAGAGCATAACAATAAAGCCGAATGGCCCTTTTGGCTGTCATACGCTTCTAGGTGTCCGAAGTTCAACATACGAAAGTAGCTTTAATAACGCCCACCTGACCCCACGAAAACTGAGAAA	0	6	10	4	7	2	1	7	5	4	6	14	7	24	23	11	33	13	12	22	0	0	4	1	2	2	29	28	1	2	47	8	22	13	4	4	2	7	0	0
OTU_976	No Match	No Match	No Match	No Match	No Match	No Match	No Match	Midori2	GCCTCGCCAATCACCGCCGGGATACCCTTTGAGCCAAACGTCTCCAGGTATCTTCCGCCAACGCCGCGCAGGGCCTTTTTGATATTGGTTCGAGCCGGCCAACCGAACATCTTTTCCAGCTCTTCCAGGATGTCATCCAGGAATGGGATACCCGCCATGCCGG	0	0	0	2	0	0	0	0	0	0	0	0	0	0	0	0	0	0	0	0	0	0	0	0	1	0	4	0	0	0	0	0	0	0	0	0	0	0	0	0
OTU_977	Chordata	Actinopteri	Perciformes	Percidae			93.976	Midori2	GCGGTTATACGAGAGGCCCAAGTTGACAAAAATCGGCGAAAAGCGTGGTTAAGCTAAAATTAAAACTAAAGCCGAACACCTTCAGAGCTGTTATACGCATCCGAAGGTAAGAAGTTCAACCACGAAAGTGGCTTTATAGCCCCTGAACCCACGAAAGCTACGATA	0	0	0	0	0	0	0	0	0	0	0	0	0	1	0	1	0	0	0	0	0	0	0	0	0	0	1	0	0	0	0	0	1	0	0	0	0	1	0	0
OTU_978	Chordata	Actinopteri	Cypriniformes	Leuciscidae			94.798	Midori2	GCGGTTATACGAGAGGCCCAGTTAATAATACACGGCGTAAAGGGTGGTTAAGGAAAGTATTAACAATAAAGCCGAATGGCCCTTTGGCTGTCATACGCTTCTAGGTGTCCGAAGCCCAACCACACGAAAGTAGCTTTAACAAAGCCCACCTGACCCCGCGAAAGCTGAGAAA	0	11	0	5	0	0	0	0	0	0	0	0	0	0	2	0	0	0	0	0	0	0	0	12	0	0	1	0	0	0	0	0	4	0	0	0	0	0	0	0
OTU_979	Chordata	Actinopteri	Gobiiformes	Gobiidae			94.012	Midori2	GCGGTTATACGAGAGGCCCGAGTTGACAAACATTCGGCGTAAAGCGTGGTTAGTGATATCACCTCCACTAAAGCCAAACACCTTCAAGGCTGTAATACGCCCCCGAAGACAGGAAGCCCAATCACGAAAGTAGCTTTAATTACTATGAACCCACGAAAGCTGAGAAA	0	0	0	1	0	0	0	0	1	0	0	0	0	1	0	1	0	1	0	0	0	0	0	0	0	0	0	0	0	0	0	0	0	0	0	0	0	0	0	0
OTU_980	No Match	No Match	No Match	No Match	No Match	No Match	No Match	Midori2	ATAGCACGGTGCAAGTGTGCCACACCGTGAAACCCGGCACCAAAGCCATCCCACGAGCGGGTGTCATTTTGCATGCACAGGGCTGCATTTGCAGCCTTCACCTTCGTATTTCCCTCTGCGAGGCGACCGTCTTGTCACGATTTGTGTTGACGCCTGAT	0	0	0	0	0	0	0	0	0	0	0	0	0	0	0	0	0	0	0	0	0	0	0	0	0	0	4	0	0	0	0	0	0	0	0	0	0	0	0	0
OTU_981	Chordata	Actinopteri	Cypriniformes	Leuciscidae	Rutilus	Rutilus rutilus	97.076	Midori2	GCGGTTAAACAAGAGGCCCTAGTTAATAATACACGGCGTGAAGGGTGGTTAAGGGAAGCACAATAATAAAGCCAAATGGCTTTGGCTGTCATACGCTTCTAGGTGTCCGAAGCCCAATATACGAGAGTAGCTTTAATAAAGCCCACCTGACCCCACGAAAGCTGAGAAA	0	1	0	0	0	0	0	0	0	0	0	2	0	0	1	0	0	0	3	0	0	0	0	0	1	1	0	1	0	1	0	1	1	0	0	0	0	0	0	0
OTU_982	Chordata	Actinopteri	Cypriniformes				95.266	Midori2	GCGTTTAAACGAGAGGCCCCAGTTAATAATACACGGCGTAAAGGGTGGTTAAGGATAAACAAAAATAAAGTCAAATGGCCCCTTGGCCGTCATACGCTTCTAGGAGTCCGAAGCCCTAATACGAAAGTAACTTCAATAAACCCACCTGACCCCACAAAAGCTGAGAAA	2	1	1	4	4	1	1	1	4	3	3	0	4	10	6	4	5	3	4	3	0	0	0	0	1	4	2	1	2	2	7	24	6	0	1	2	2	1	0	0
OTU_983	Chordata	Actinopteri	Gobiiformes	Gobiidae	Neogobius		96.386	Midori2	GCGGTTATACGAGAGGCCCAAGTTGACAAGAATCGGCCAAAAGCGTAGTTAGTGATATCACCTCCACTAAAGCCAAACACCTTCAAGGCTGTAATACGCCCCCGAAGACAGGAAGCCCAATCACGAAAGTAGCTTTAATTTTCAAGCCACGAAAGCTAGGAAA	0	0	0	0	0	0	0	0	0	0	0	0	0	0	0	0	0	0	0	0	0	0	0	0	0	0	0	0	0	0	0	0	0	0	0	0	0	0	0	0
OTU_984	Chordata	Actinopteri	Cypriniformes	Leuciscidae			93.023	Midori2	GCGGTTATACGAGAGGCCCAAGTTGATAGACATCGGCGTAAAGGGTGGCTAAGGGAAGCACAATAATAAAGCCGAATGGCCCTTTGGCTGTCATACGCTTCTAGGTGTCCGAAGTTCAACATACGAAAGTAGCTTTAATAACGCCCACCTGACCCCACGAAAGCTGAGAAA	2	1	1	5	1	0	3	0	3	3	0	0	3	3	1	6	2	1	4	1	1	0	4	0	1	1	2	2	1	0	3	2	12	15	2	2	1	2	0	0
OTU_985	No Match	No Match	No Match	No Match	No Match	No Match	No Match	Midori2	GGGTGGGGCCTGTTCACTAAGGCGGAAGAGGTCGTTGATCTCTTTCTCGGCAAATTTTTTACTCGCATTCCACTAAGCCGCATTGAGTACGCGCCAGTGTTCGAGATCCTCAAGGAGCACGTGCGAGAGTTTTGCCAGCTGCAGCTAGCTTTCATTCAGGAGAC	0	0	0	0	0	0	0	0	0	0	0	0	0	0	0	0	0	0	0	0	0	1	0	0	0	0	0	0	0	0	0	0	0	0	0	0	0	5	0	0
OTU_986	Chordata	Actinopteri	Anguilliformes	Anguillidae	Anguilla		96.45	Midori2	GCGGTTATACGAGGGGCTCAAATTGATATTACACGGCTAAAGCGTGATTaaaaaacaaaaaaaaCTAAAGCCAAAATACTTCCCAAGCTGTCATACGCTACCGGAACATAAACGAAGCCCTATAACGAAGGTAGCCTTAACACCTTTGAACTCACGACAGTTGAGGAA	0	0	0	2	0	0	0	0	0	0	0	0	0	0	0	0	0	0	0	0	0	0	0	0	0	0	0	0	0	0	0	0	0	0	0	0	0	0	0	0
OTU_987	No Match	No Match	No Match	No Match	No Match	No Match	No Match	Midori2	GACACGGCCCATGGCTTCGGGCCGAGCCAACTCCGGCAGAAAAGACGCTGTGAGCGACTCACCATAAGAAAAGAATGTATTGGACACCACCAAGATGCCCAGGGCCAAAGCGACCTGCCCTGGCCCGACAAAAGCCAGGGCGGCTGTGCTGAGCACACAG	0	0	0	0	0	0	0	0	0	4	0	0	0	0	0	0	0	0	0	0	0	0	0	0	0	0	0	0	0	0	0	0	0	0	0	0	0	0	0	0
OTU_988	Chordata	Actinopteri	Cypriniformes	Leuciscidae			92.727	Midori2	GCGGTTAAACGAGAGCCCCTAGTTAATAATACACGGCGTAAAGGGTGGTAAGGAAAGCATAACAATAAATCCGAATGGCCCTTTGGCTTTCATACGCTTCTAGGTGTCCGAAGCCCAATATACGAAAGTGGCTTTATAGCCCCTGAACCCACGAAAGCTACGATA	0	0	0	0	0	0	0	0	0	0	0	0	0	0	0	0	0	0	0	0	0	0	0	0	0	0	0	0	0	0	0	0	0	0	0	0	0	0	0	0
OTU_989	No Match	No Match	No Match	No Match	No Match	No Match	No Match	Midori2	AGAAATCTGTGAAGGCATTAAATCACGTGCGCCACGCAAGCCAACCGCATTGAGTTTCATGAGTACTAGTGATCGCAATAACTCTTCGCTTAAGTTGGTATGTTCACGCAAAGGAAAGGCGACGTTTTCAAAAACACTCAGATCGGTAAAAAGTGCGC	0	0	0	0	5	0	0	0	0	0	0	0	0	0	0	0	0	0	0	0	0	0	0	0	0	0	0	0	0	0	0	0	0	0	0	0	0	0	0	0
OTU_990	Chordata	Actinopteri	Cypriniformes	Leuciscidae	Rutilus	Rutilus rutilus	97.661	Midori2	GCGGTTAAACGAGAGGCCCTAGTTAATAATACACGGCGTAAAGGGTGGTTAAGGGAAGCACAATAATAAAGCCGAATGGCCCTTTGGCTGTCATACGCTTCTAGGTGTCCGAAGCCCAATATATGAAAGTAGCTTTAATAACGCCCACCTGACCCCACAAAAGCTGAGAAA	2	2	1	3	1	1	2	1	3	2	1	4	6	3	6	2	3	5	1	6	1	7	0	2	1	4	0	13	0	1	1	2	4	1	2	4	3	2	0	0
OTU_991	Chordata	Actinopteri	Perciformes	Percidae			93.865	Midori2	GCGGTTATACGAGAGGCCCAAGTTGATAGACATCGGCGTAAAGCGTGGTTAAGATTAAAGGCAATACTAAAGCCGGACACCTTCAGGGCTGTTATACGCATCCGGAGGTGAGAAGTTCAACCACGAAGGTGGCTTTATCTAACCTGAACCCACGAAAGCTACGGCA	213	239	255	239	108	187	89	110	70	131	121	131	300	252	270	289	180	157	231	214	0	134	366	228	115	64	313	189	252	219	167	130	260	225	347	237	317	505	0	0
OTU_992	No Match	No Match	No Match	No Match	No Match	No Match	No Match	Midori2	TTGAGGTGCCGTTGCAAGCCCATCCACTCGACAGCACGATAAAAAGCGCCAAAGTCTTGGTGCCAGTCTGCATAGTCAAGCAGCCCCACTTTGCGGGCTTTTTCCCAATAACGGATGGTGATGTCTAAGACAAAGTCCTCATCCCACGACAGGAAGGCATCGCGCAT	0	0	0	0	0	0	0	0	0	0	0	0	0	2	0	0	0	0	0	0	0	0	0	0	0	0	1	0	0	0	5	0	0	0	0	0	0	0	0	0
OTU_993	Chordata	Actinopteri	Gobiiformes	Gobiidae	Neogobius		96.407	Midori2	GCGGTCATACGAGAGGCCCAAGTTGACAAAAATCGGCGAAAAGCGTGGTTAGTGATGTCACCTCCACTAAAAGCCAAACACCTTCAATGCTGTAATACGCCCCCGAAGACAGGAAGCCCAATCACGAAAGTAGCTTTAATTTTCATGACCCACGAAAGCTAGGAAA	0	0	0	0	0	0	0	0	0	0	0	0	0	0	0	0	0	0	0	0	0	0	0	0	0	0	0	0	0	0	0	0	0	0	0	0	0	0	0	0
OTU_994	Chordata	Actinopteri	Cypriniformes	Leuciscidae	Leuciscus		96.512	Midori2	GCGGTTAAACGAGAGGCCCCAGTTAATAATACACGGCGTAAAGGGTGGTTAATGAAAGTATTAACAATAAAGCCGAATGGCCCTTTGGCTTCATACTCTTCTAGGTGTCCGAAGCCCAATATACGAAAGTAGCTTTAATAAAGCCCACCTGACCCCACGAAAGCTGAGAAA	0	0	1	0	1	1	0	0	0	0	0	0	2	0	0	2	0	0	1	0	1	0	0	0	0	1	1	0	0	0	1	0	0	0	0	0	0	0	0	0
OTU_995	Chordata	Actinopteri	Cypriniformes				92.982	Midori2	GCGGCTATACGAGAGGCCCAAGTTGATATTACAACGGCGTAAAGGGTGGTTAAGGATAAACAAAAATAAAGTCAAATGGCCCCTTGGCCGTCATACGCTTCTAGGAGTCCGAAGTTCAACATACGAAAGTAGCTTTAATAACGCCCACCTGACCCCACGAAAGCTAGGAAA	32	61	67	77	138	79	109	120	67	93	66	123	104	139	194	117	141	96	100	117	25	0	15	20	42	67	61	39	59	57	131	72	121	165	54	81	65	40	0	0
OTU_996	No Match	No Match	No Match	No Match	No Match	No Match	No Match	Midori2	GACTTGCCGGCTTTCGTGTTCCAGGGCGCGATTTTCGGCAGCAGCAGCATGCCCGGTATCGCCAGCGCGAAGCAGATCAGGAAGAAGACAAACCAGCCGGTCTGGTCAACGATAAAGCCGGTAAGCGCATTAAAGAAAGTGCGCGGCACAGCGGCCAGACTGGTAAACAACG	0	0	0	0	0	0	0	0	0	6	0	0	0	0	0	0	0	0	0	0	0	0	0	0	0	0	0	0	0	0	0	0	0	0	0	0	0	0	0	0
OTU_997	Chordata	Actinopteri	Cypriniformes	Cyprinidae	Barbus		95	Midori2	GCGGTTATACGAGAGGCCCAAGTTGATATTATAACGGCGTAAAGGGTGGTTAGGGATAAATAATAATGAAGCCAAATGGCCCCTTGGCCGTCATACGCTTCTAGGCGTCCGAGGCCCAATCACGAAAGTAGCTTTAATTTTCATGAAGCCACGAAAGCTAGGAAA	1	1	0	0	0	0	0	1	0	0	0	0	0	0	1	1	0	1	1	0	0	1	4	5	2	1	0	2	0	0	0	2	0	0	0	0	0	3	0	0
OTU_998	Chordata	Actinopteri	Gobiiformes	Gobiidae			93.939	Midori2	GCGGTTATACGAGAGGCCCAAGTTGACAAAGATCGGCGTAAAGCGTGGTTAATGATAATTCCACTAAAGCCAAACACCTTCAAGGCTGTTATACGCCCCCGAAGACAGGAAGACCCATCACGAAAGTAGCTTTAACACCTTTGAACTCACGACAGTTGAGGAA	0	1	0	0	0	0	0	0	0	0	0	0	0	0	0	0	0	0	0	0	0	0	0	0	0	0	0	0	0	0	0	0	0	0	0	0	0	2	0	0
OTU_999	Chordata	Actinopteri	Gobiiformes	Gobiidae	Neogobius		96.988	Midori2	GCGGTTATACGAGAGGCCCAAGTTGACAAAAATCGGCGAAAAGCGTGGTTAGTGATATCACCTCCGCTAAAGCCAAGCACCTTCAAGGCTGTAATACGCCCTCGAAGACAGGAAGCCCAATCACGAAAGTAGCCTCAATTTTCATGAAGCCACGAAAGCTAGGAAA	1	0	0	73	0	0	0	0	0	0	0	0	1	0	0	1	0	1	0	0	0	0	0	1	1	0	0	1	0	0	0	0	0	0	0	2	0	0	0	0
OTU_1000	No Match	No Match	No Match	No Match	No Match	No Match	No Match	Midori2	AGGGCGAATTGGACCGTCAACCCGATGGACTGGGCAAGGAAATGAAACGCCTGCAGTCGACCCTGGTCGAGCAAGAACACAGCGCCGTCGAGAGCCGCCTTAGCGCCTGGCAGGGGCGTTTTTCGCAGCATTTGGGCGAGGCCATCAAGGCCGCTCCGGAAGGCAGTGACCTGCA	0	0	0	0	0	0	0	0	0	0	0	0	0	0	0	0	0	0	0	0	0	5	0	0	0	0	0	0	0	0	0	1	0	0	0	0	0	0	0	0
OTU_1001	Chordata	Actinopteri	Cypriniformes	Leuciscidae			94.186	Midori2	GCGGTTAAACGAGAGGCCCTAGTTAATAATACACGGCGTAAAGGGTGGTTAAGGAAAGTATTAACAATAAAGCCGAATGGCCCTTTGGCTGTCATACGCTTCTAGGTGTCCGAAGCCCTAATACGATAGTAACTTTAATGAACCCACCTGTCCCCACGAAAGCTGAGGAA	3	25	3	11	6	50	11	6	18	9	9	12	24	32	13	10	7	11	9	9	0	0	1	67	53	7	4	1	3	6	10	8	12	14	31	8	2	1	1	0
OTU_1002	Chordata	Actinopteri	Gobiiformes	Gobiidae			94.012	Midori2	GCGGTTATACGAGAGGCCCAAGTTGACAAAAATCGGCGAAAAGCGTGGTTAGTGATATCACCTCCACTAAAGCCAAACACCTTCAAGGCTGTCATACGCTTCTAGGTGTCCGAAGCCCAATCACGAAAGTAGCTTTAATTTTCATGAAGCCACGAAAGCTAGGAAA	0	0	0	0	1	0	0	0	3	0	0	0	0	0	0	1	0	0	0	0	0	0	1	0	0	0	0	0	0	0	0	1	0	0	0	0	0	0	0	0
OTU_1003	Chordata	Actinopteri	Gobiiformes	Gobiidae	Ponticola		96.951	Midori2	GCGGTTATACGAGAGGCCCGAGTTGACAAACATTCGGCGTAAAGCGTGGTTAATAACTTGTTTACTAAAGCCAAACACCTTTAAGGCTGTTATACGCCCCCAAAGGTAGGAAGACCCCTCACGAAAGTAGCTTTAATTACTATGACCCCACGAAAGCTGAGAAA	0	0	4	1	1	1	1	0	1	5	4	1	2	5	1	0	1	3	2	1	0	0	10	4	1	0	3	0	0	1	4	0	2	2	2	4	2	6	0	0
OTU_1004	Chordata	Actinopteri	Perciformes	Percidae	Perca	Perca fluviatilis	97.5	Midori2	GCGGTTATACGAGAGGCCCAAGTTGATAGACATCGGCGTAAAGCGTGGTTAAGATTAAAGACAATACTAAAGCCGAACACCTTCAGAGCTGTTATACGCATCCGGAGGTAAGAAGTTCAACCAAAAGTGGCTTTATAGCCCCTGAACCCACGAGAGCTGAGAAA	0	0	0	0	0	1	0	0	0	0	0	0	0	0	0	0	0	0	0	0	0	0	1	0	0	0	0	0	0	0	0	0	0	0	0	0	0	0	0	0
OTU_1005	Chordata	Actinopteri	Perciformes	Percidae	Perca	Perca fluviatilis	98.125	Midori2	GCGGTTATACGATAGGCCCAAGTTGATAGACATCGGCGTAAAGCGTGGTTAAGATTAAAGACAATACTAAAGCCGAACACCTTCAGAGCTGTTATACGCATCCGAAGGTAAGAAGTTCAACCACGAAAGTGGCTTTATTACCCCTGAACCCACGAAAGCTGATA	2	2	0	1	0	1	1	0	0	1	0	1	0	0	0	1	1	1	0	1	0	0	0	0	0	1	1	0	1	0	0	1	1	0	1	0	0	0	0	0
OTU_1006	Chordata	Actinopteri	Gobiiformes	Gobiidae	Neogobius		96.988	Midori2	GCGGTTAAACGAGAGGCCCTAGTTGACAAAAATCGGCGAAAAGCGTGGTTAGTGATATCACCTCCACTAAAGCCAAACACCTTCAAGGCCGTAATACGCCCCCGAAGACAGGAAGCTCAATCACGAAGGTAGCTTTAATTTTCATGAAGCCACGAAAGCTAGGAAA	2	1	0	1	6	1	0	2	1	4	3	2	3	7	3	3	3	1	1	1	3	1	0	1	5	4	1	0	3	3	3	6	2	6	2	4	2	1	0	0
OTU_1007	No Match	No Match	No Match	No Match	No Match	No Match	No Match	Midori2	ATGAACAAAAGGTCGCCGATCCAAACATTGCCGCCTTCAAAGGCCTGGAGCAGACTCATACCGCCCACCAAAATATCGCCGCACACAATCATGATCAAACCAATGGCGCGGTTCATGCCAATTTGCTCGCGCAAAAAAAGCCACATCAACAAGGTTGTCCAAAGCGG	0	0	0	4	0	0	0	0	0	0	0	0	0	0	0	0	0	0	0	0	0	0	0	0	0	0	0	0	0	0	0	1	0	0	0	2	0	0	0	0
OTU_1008	No Match	No Match	No Match	No Match	No Match	No Match	No Match	Midori2	TTATGTCAAAATATGACAGAGAGGCGACTGCTAAAGCCATCACGATCCTCGAACGGGTCAAGCGGCTGGAGGAATTATTAGAAAAGGAGATTAAGGATGTAGGTCAACATTATGATCACATTCAGGCTTCCCAAGAATTCGCATTTGGCTGCGTGCTGGACTTCATT	0	0	0	0	0	4	0	0	0	0	0	0	0	0	0	0	0	0	0	0	0	0	0	0	0	0	0	0	0	0	0	0	0	0	0	0	0	0	0	0
OTU_1009	No Match	No Match	No Match	No Match	No Match	No Match	No Match	Midori2	CCTTCAGAAATTGGCTTATCCTCCCCGTCCACCTTTCCCCATGGTGCTATATCCATATCCTGAAAGGACTTTCCCTCGTCCGTaaaaaaaaCCCCTTATGTTACGCCAAATATGTCGGTGTCTATAATCACAATGTCGAACGGAATGCTGCGGCAATGTTTCCGTCATTCCAACCGG	0	0	0	0	0	0	0	0	0	0	0	0	0	0	0	0	0	0	0	0	0	0	0	4	0	0	0	0	0	0	0	0	0	0	0	0	0	0	0	0
OTU_1010	Chordata	Actinopteri	Perciformes	Percidae	Sander		96.364	Midori2	GCGGTTATACGAGAGGCCCAAGTTGATAGACATCGGCGTAAAGCGTGGTTAAGACAAAAACAAAACTAAAGCCGAACACCTTCAGAGCTGTTATACGCATCCGGAGGTGAGAAGTTCAACCACGAAGGTGGCTTTATAGCCCCTGAACCCACGAAAGCTACGATA	0	1	0	0	0	0	0	0	0	2	1	0	0	0	0	0	2	0	0	0	0	0	0	0	2	0	0	2	1	0	0	0	0	0	0	1	0	1	0	0
OTU_1011	Chordata	Actinopteri	Gobiiformes	Gobiidae	Neogobius		95.783	Midori2	GCGGTTATACGAGAGGCCCAAGTTGATAGACATCGGCGAAAAGCGTGGTTAGTGATATCACCTCCACTAAAGCCAAACACCCTCAAGGCTGTAATACCCCCCGAAGACGAAGCCCAATCACGAAAGTAGCTTTAATTTTCATGAAGCCACGAAAGCTAGGAAA	3	1	1	1	1	0	3	1	1	1	2	1	7	1	1	5	6	8	2	2	2	3	1	1	1	3	2	3	2	0	5	1	3	2	4	5	0	0	0	0
OTU_1012	Chordata	Actinopteri	Gobiiformes	Gobiidae	Neogobius		96.988	Midori2	GCGGTTATACTGGAGGCCCAAGTTGACAAAAATCGGCGAAAAGCGTGGTTAGTGATATCACCTCCACTAAAGCCAAACACCTTCAAGGCTGTAATACGCCCCCGAAGACAGGATCCCAATCACGAAAGTAGCTTTAATTTTCATGAAGCCACAAAAGCTAGGAAA	0	2	1	1	0	1	1	0	0	1	0	0	1	0	0	0	1	0	0	0	1	0	0	0	0	1	0	1	0	0	0	0	0	0	0	0	0	1	0	0
OTU_1013	Chordata	Actinopteri	Cypriniformes	Leuciscidae			91.228	Midori2	GCGGTTAAACGAGAGGCCCTAGTTAATAATACACGGCGTAAAGGGTGGTTAAGGAAAGCATAACAATAAAGCCGAATGGCCCTTTGGCTGTTATACGCTTCTAGGTGTCCGAAGTTCAACATACGAAAGTAGCTTTAATCTTCATGAACCCACGAAAGCTAGGAAA	0	6	0	1	2	2	0	6	2	1	2	2	1	2	2	1	4	0	4	2	2	0	0	2	6	1	5	7	3	0	7	2	5	6	2	1	0	6	0	0
OTU_1014	No Match	No Match	No Match	No Match	No Match	No Match	No Match	Midori2	GCTCAAACAGGCCGCTGTAACCCACCCCCACAATGAGCAACGCACTCACGATGAAGGCCCCTGTGGCTTCCGGCAGGGTCACGCCCTGCGTCACGGCCAACACCGCCGCACCGGGCGTTGACCATGCCGTCAACACCGGCTGCCGATACCACAGGCTCAAGAC	0	0	0	0	0	0	0	0	0	0	0	2	0	0	0	0	0	0	0	0	0	0	0	0	0	0	0	0	0	0	4	0	0	0	0	0	0	0	0	0
OTU_1015	Chordata	Actinopteri	Cypriniformes	Leuciscidae	Abramis	Abramis brama	98.193	Midori2	GCGGTTAAACGAGAGGCCCCAGTTAGTAATACACGGCGTAAAGGGTGGTTAAGGAAAGTATTAACAATAAAGCCGAATGGCCCTTTGGCTGTCATACGCTTCTAGGTGTCCGAAGTTCAACATACGAAAGTAGCTTTAATAACGCCAACCTGAACCCACGAAAGCTACGGCA	8	5	4	4	7	6	2	4	0	10	3	1	6	1	1	4	4	3	5	4	1	8	2	5	3	4	12	3	3	3	3	2	4	5	1	4	15	20	0	0
OTU_1016	No Match	No Match	No Match	No Match	No Match	No Match	No Match	Midori2	TAAAATGTCAGCCTTGGTTTATTTTCTTTCAGCAGCTGAGGGTAATTGAACTTGATTTCAAACTGCGAATTTATGGACGCGAAACTGTTGAGCTTCGTGAACAAGTCGGTGGCTCCATTTGTGAATGCGAGCTTGTATTCGACGATCGGGCATCTCTTCGGGTCACTGCTGA	0	0	0	0	0	0	0	0	0	0	0	0	0	0	0	0	0	0	0	0	0	0	0	4	0	0	0	0	0	0	0	0	0	0	0	0	0	0	0	0
OTU_1017	Chordata	Actinopteri	Cypriniformes	Cyprinidae			90.116	Midori2	GCGGTTATACGAGAGGCCCAAGTTGACAAAAATCGGCGAAAAGCGTGGTTAAGGAAAGTATTAACAATAAAGCCGAATGGCCCTTTGGCCGTCATACGCTTCTAGGTGTCCGAGGCCCTATATACGAAAGTAGCTTTAATTAACCCGCCTGACCCCACGAAAACTGAGAAA	0	0	0	0	0	0	1	0	1	0	0	0	0	0	0	0	0	0	0	0	0	0	1	0	0	0	2	0	0	0	1	0	0	1	0	0	0	0	0	0
OTU_1018	Chordata	Actinopteri	Perciformes				87.349	Midori2	GCGGTTATACCTGCCAGCCAAGTTGACAAAAATCGGCGAAAAGCGTGGTTAGTGATATCACCTCCACTAAAGCCGAACACCTTCAGAGCTGTTATACGCATCCGAAGGTAAGAAGTTCAACCACGAAAGTGGCTTTATAGCCCCTGAACCCACGAAAGCTACGATA	0	0	0	0	0	0	0	0	0	0	0	0	0	0	0	0	0	0	0	0	0	0	0	0	0	0	0	0	0	0	0	0	0	0	0	0	0	0	0	0
OTU_1019	Chordata	Actinopteri	Perciformes				86.826	Midori2	GCGGTTAAACGAGAGGCCCTAGTTAATAATACACGGCGTAAGGGGTGGTTAGTGATATCACCTCCACTAAAGCCAAACACCTTCAGGGCTGTAATACGCATCCGAAGGTAAGAAGTTCAACCACGAAAGTGGCTTTATAGCCCCTGAACCCACGAAAGCTACGATA	0	0	0	0	0	0	0	0	0	1	0	0	0	0	0	0	0	0	0	0	0	0	0	0	0	0	0	0	0	0	0	0	0	0	0	0	0	0	0	0
OTU_1020	Chordata	Actinopteri	Gobiiformes	Gobiidae	Neogobius		96.407	Midori2	GCGGCTATACGAGAGGCCCGAGTTGACAAACATTCGGCGTAAAGCGTGGTTAATGATATCACCTCCACTAAAGCCAAACACCTTCAAGGCTGTAATACGCCCCCGAAGACAGGAAGCCCAATCACGAAAGTAGCTTTAATTTTCATGAAGCCACGAAAGCTAGGAAA	53	83	118	189	10	13	78	37	33	99	78	26	61	81	65	82	49	106	107	69	46	0	100	89	87	63	58	34	39	59	82	44	63	108	96	78	55	78	0	0
OTU_1021	No Match	No Match	No Match	No Match	No Match	No Match	No Match	Midori2	ACAACATAACACCACATTTTTTTCATCCCACACAGCTTCTATCAAAACGATCCGCGAAGATGTGGGCTACAAGAGGATATGAGCCGCATCACACACCAATGCACGGCTGGCCCGCACGGCACCCGTTTGCAAAAACATCGCCCCACCCCTTTTTCCCACG	0	0	0	0	0	0	0	0	0	0	0	4	0	0	0	0	0	0	0	0	0	0	0	0	0	0	0	0	0	0	0	0	0	0	0	0	0	0	0	0
OTU_1022	Chordata	Actinopteri	Cypriniformes	Leuciscidae	Abramis	Abramis brama	97.973	Midori2	AGTGATAAACTGTGCCACCACCGCGGTTAAACGAGAGGCCCCAGTTAATAATACACGGCGTAAAGGGTGGTTAAGGAAAGTATTAACAATAAAGCCGAATGGCCTTTTGGCTGTCATACGCTTCTAGGTGTCCGAAGTTCAACATACGAAAGCTGAGAAA	0	0	0	0	0	0	0	0	0	0	0	0	0	0	0	0	0	0	0	0	0	0	0	0	0	0	0	0	0	0	0	0	0	0	0	0	0	0	0	0
OTU_1023	Chordata	Actinopteri	Perciformes	Percidae	Perca		95.732	Midori2	GCGGTTATACGAGAGGCCCAAGTTGACAAAAATCGGCGAAAAGCGTGGTTAAGATTAAAGACAATACTAAAGCCGAACACCTTCAGAGCTGTTATACGCATCCGAAGGTAAGAAGTTCAACCACGAAAGTGGCTTTATAGCCCATGAAGCCACGAAAGCTAGGAAA	14	25	7	4	3	9	15	10	14	5	7	14	28	14	10	24	18	15	7	8	0	2	13	7	12	7	12	12	8	5	9	17	24	13	9	14	7	14	0	0
OTU_1024	Chordata	Actinopteri	Gobiiformes	Gobiidae	Neogobius		95.783	Midori2	GCGGTTATACGAGAGGCCCAAGTTGACAAAAATCGGCGAAAAGCGTGGTTAGTGATATCACCTCCACTAAAGCCAAACACCTTCAAGGCTGTAATACGCCCCCGAAGACAGGAAACCCAATCAAAAGTAGCTTTAATTACTATGAATCCACGAAAGCTAGGAAA	0	0	0	0	0	0	0	0	0	0	0	0	0	0	0	0	0	0	0	0	0	0	0	0	0	0	0	0	0	0	0	0	0	0	0	0	0	0	0	0
OTU_1025	Chordata	Actinopteri	Cypriniformes				92.941	Midori2	GCGGTTATACGAGAGGCCCAAGTTGATATTACAACGGCGTAAAGGGTGGTTAAGGATAAACAAAAATAAAGTCAAATGGCCCCTTGGCCGTCATACGCTTCTAGGAGTCCGAGGCCCCTAAACGAAAGTAGCTTTAGTACCGCCCACCTGACCCCACGAAAACTGAGAAA	0	0	0	0	0	0	0	0	0	0	0	4	0	0	0	0	0	0	0	0	0	0	0	0	0	0	0	0	0	0	0	0	0	0	0	0	0	0	0	0
OTU_1026	Chordata	Actinopteri	Perciformes	Gasterosteidae			91.515	Midori2	GCGGTTATACGAGAGGCCCAAGTTGATAGACATCGGCGTAAAGCGTGGTTAAGACAAAAACAAAACTAAAGCCGAACACCCCCAAAGCTGTTATACGCATCCGGAGGTGAGAAGTTCAACCACGAAGGTGGCTTTATCTAACCCCCCCACGAAAGCTACGGCA	0	0	0	0	1	0	0	0	0	1	0	0	0	0	0	0	0	1	0	1	0	0	0	0	0	0	1	0	0	0	0	0	2	0	0	0	0	2	0	0
OTU_1027	Chordata	Actinopteri	Cypriniformes	Leuciscidae	Rutilus	Rutilus rutilus	97.076	Midori2	GCGGTTAAACGAGAGGCCCCAGTTAATAATACACGGCGTAAAGGGTGGTTAAGGGAAGCACAATAATAAAGCCGAATGGCCCTTTGGCTGTCATACGCTTCTAGGTGTCCGAGGCCCAATATACGAAAGTAGCTTTTAATAAAGTCCACCTGACCCCACGAAAGCTGAGAAG	0	2	0	0	0	4	0	1	2	11	0	6	3	3	1	0	1	3	1	3	0	0	0	1	0	1	1	3	2	0	4	1	5	0	1	0	3	2	0	0
OTU_1028	Chordata	Mammalia	Primates	Hominidae	Homo	Homo sapiens	98.765	Midori2	GCGGTCACACGATTAACCCAAGTCAATAGAAGCCGGCGTAAAGAGTGTTTTAGATCACCCCCTCCCCAATAGAGCTAAAACTCACCTGAGTTGTAAAAAACTCCAGTTGACACAAAATAGACTACGAAAGTGGCTTTAACATATCTAACACACAATAGCTATACC	0	0	0	0	0	0	0	0	0	1	0	0	0	0	0	0	1	0	1	0	0	1	1	6	3	2	0	0	0	0	0	0	0	0	1	0	0	0	4	0
OTU_1029	Chordata	Actinopteri	Perciformes	Percidae	Sander		96.97	Midori2	GCGGTATACGAGAGGCCCAAGTTGACAAAAATCGGCGTAAAGCGTGGTTAGGACAAAAACAAAACTAAAGCCGAACACCTTCAGAGCTGTTATACGCACCCGAAGGTAAGAAGTTCAACCACGAAAGTGGCTTTATTACCCCTGAACCCACGAAAGCTACGATA	7	5	5	6	5	0	6	4	2	3	9	2	3	1	5	8	14	9	1	8	5	0	0	1	0	0	6	4	3	7	18	3	7	3	0	5	6	5	0	0
OTU_1030	Chordata	Actinopteri	Gobiiformes	Gobiidae	Neogobius		96.988	Midori2	GCGGTTAAACGAGAGGCCCTAGTTGACAAAAATCGGCGAAAAGCGTGTCTAGTGATATCACCTCCACTAAAGCCAAACACCTTCAAGGCTGTAATACGCCCCCGAAGACAGGGAGCCCAATCACGAAAGTAGCTTTAATTTTCATGAAGCCACGAAAGCTAGGAAA	5	14	1	3	6	3	4	11	12	8	2	7	10	6	5	13	7	11	6	21	2	6	2	7	5	8	10	5	4	4	10	7	7	15	3	8	1	7	0	1
OTU_1031	Chordata	Actinopteri	Gobiiformes	Gobiidae	Neogobius		96.386	Midori2	GCGGTTATACGAGAGGCCCAAGTTGACAAAAATCGGCGAAAAGCGTGGTTAGTGGTATCACCTCCACTAAAGCCAAACACCTTCAACTGTAATACGCCCCCGAAGACAGGAAACCCAATCAAAAGTAGCTTTAATTTTCATGAAGCCACGAAAGCTAGGAAA	0	0	0	0	0	0	0	0	0	0	0	0	0	0	0	0	0	0	0	0	0	0	0	0	0	0	0	0	0	0	0	0	0	0	0	0	0	0	0	0
OTU_1032	Chordata	Actinopteri	Cypriniformes	Leuciscidae	Rutilus	Rutilus rutilus	97.661	Midori2	GCGGTTAAACGAGAGGCCCTAGTTAATAATACACGGCGTAAAGGGTGGTTAAGGGAAGCACAATAATAAAGCCAAATCGCCCTTTAGCTGTCGTACGCTTCTAGGTGTCCGAAGCCCAATATACGAAAGTAGCTTTAATAAAGCCCACCTGACCCCACGAAAACTGAGAAA	0	1	0	1	0	0	0	0	1	0	0	0	6	1	0	0	0	0	0	0	0	1	0	0	2	1	2	3	0	0	0	0	0	3	2	0	0	0	0	0
OTU_1033	Chordata	Actinopteri	Cypriniformes	Leuciscidae	Rutilus	Rutilus rutilus	97.661	Midori2	GCGGTTAAACGAGAGGCCCCAGTTAATAATACATGGCGTAAAGGGTGGTTAAGGGAAGCACAATAATAAAGCCAAATGGCTCTTTGGCTGTCATACGCTTCTAGGTGTCCGAAGCCCAATATACGAAAGTAGCTTTAATAAAGCCCACCTAACCCCACGAAAGCTGAGAAA	1	2	2	0	0	0	1	2	0	0	2	0	3	1	1	26	2	1	0	0	0	0	0	0	0	0	1	0	0	0	2	0	7	2	0	0	2	1	0	0
OTU_1034	Chordata	Actinopteri	Gobiiformes	Gobiidae	Neogobius		96.988	Midori2	GCGGTTATACGAGAGGCCCAAGTTGACAAAGATCGGCGAAAAGCGTGGTTAGTGATATCACCTCCACTAAAGCCAAACACCTTCAATGCTGTAATACGCCCCCGAAGACAGGAGGCCCAATCACGAAAGTAGCTTTAATTTTCATGATTCCACGAAAGCTAGGAAA	0	2	0	0	0	0	0	0	0	1	1	1	0	0	0	0	0	0	2	0	0	0	0	0	2	0	0	0	0	0	0	0	0	0	0	1	0	0	0	0
OTU_1035	Chordata	Actinopteri	Gobiiformes	Gobiidae	Neogobius		96.988	Midori2	GCGGTTATACGAGAGGCCCAAGTTGACAAAAATCAGCGAAAAGCGTGGTTAGTGATATCACCTCCACTAAAGCCAAACACCTTCATGCTGTAATACGCCCCCGAAGACAGGAAGCCTAATCACGAAATTAGCTTTAATTTTCATGAAGCCACGAAAGCTAGGAAA	3	2	1	0	1	1	1	0	0	0	0	4	1	2	2	0	1	0	4	0	0	0	1	0	1	0	1	0	0	0	1	0	2	0	1	0	0	1	0	0
OTU_1036	Chordata	Actinopteri	Cypriniformes	Leuciscidae			94.798	Midori2	GCGGTTATACGAGAGGCCCGAGTTGACAAACATTCGGCGTAAAGGGTGGTTAAGGAGAGCATAACAATAAAGCCAAATGGCCCTTTGGCTGTCATACGCTTCTAGGTGTCCGAAGCCCAATATACGAAAGTAGCTTTAATAAAGCCCACCTGACCCCACGAAAGCTGAGTAA	2	1	0	8	0	0	2	1	0	7	1	2	3	2	0	2	2	2	0	0	1	0	1	0	0	2	1	1	1	1	1	4	0	3	0	0	7	2	0	0
OTU_1037	Chordata	Actinopteri	Cypriniformes	Leuciscidae			94.767	Midori2	GCGGTTAAACGAGAGGCCCTAGTTAATAATACACGGCGTAAAGGGTGGTTAGTGATATCACCTCCACTAAAGCCAAATGGCCCTTTGGCTGTCATACGCTTCTAGGTGTCCGAAGCCCAATATACGAAAGTAGCTTTAATAAAGCCCACCTGACCCCACGAAAGCTGAGAAA	0	0	0	0	0	0	0	0	0	0	0	0	0	0	0	0	0	0	0	0	0	0	0	0	0	0	0	0	0	0	0	0	0	0	0	0	0	0	0	0
OTU_1038	Chordata	Actinopteri	Gobiiformes	Gobiidae	Neogobius		96.988	Midori2	GCGGTTATACGAGAGGCCCAAGTTGACAAAAATCGGCGGAAAGCGTGGTTAGTGATATCACCTCCACTAAAGCCAAACACCTTCAAGGCTGTAATACGCCGAAGACAGGAAGCCCAATCACGAAAGTAGCTTTAATTTTCATGAAGCTACGAAAGCTAGGAAA	0	5	2	3	4	4	4	3	6	4	2	7	2	3	2	8	9	5	1	3	7	51	8	9	4	6	8	6	2	3	4	3	4	3	4	3	5	3	0	2
OTU_1039	Chordata	Mammalia	Rodentia	Cricetidae	Ondatra	Ondatra zibethicus	97.531	Midori2	GCGGTCATACGATTAACCCAAACTAATTATTCTCGGCGTAAAACGTGTTACTAGGAAACCAAAAATAGAATTAAAAACCATCCAATATGTGAAAATTCATCGCTACCTAAAACCAATGACGAAAGTAATTCTAGAATTCTTGACACACGAAAGCTACGATA	0	0	1	0	0	0	0	1	0	0	0	0	0	0	1	1	3	0	0	0	0	0	0	2	1	0	0	0	0	0	2	0	0	4	1	0	0	1	0	0
OTU_1040	Chordata	Actinopteri	Gobiiformes	Gobiidae	Neogobius		96.988	Midori2	GCGGTTATACGAGAGGCCCAAGTTGACAAAAATCGCGAAAAGCGTGGTTAGTGACATCACCTCCACTAAAGCCAAACACCTTCAAGTCTGTAATGCGCCCCCGAAGACAGCAAGCCCAATCACGAAAGTAGCTTTAATTTTCATGAAGCCACGAAAGCTAGGAAA	0	0	0	0	1	0	0	0	0	0	0	0	0	0	0	0	0	0	0	0	0	0	0	0	0	0	0	0	0	0	0	0	0	0	0	0	0	0	0	0
OTU_1041	Chordata	Actinopteri	Cypriniformes	Leuciscidae	Abramis		96.512	Midori2	GCGGTTAAACGAGAGGCCCCAGTTAATAATACACGGCGTAAAGGGTGGTTAGGGAAAGTATTAACAATAAAGCCGAATGGCCCTTCGGCTGTCATACGCTTCTAGGTGTCCGAAGTTCAACATACGAAAGTAGTTTAATAACGCCCACCGGACCCCACGAAAGCTACGAAA	0	0	0	1	0	0	0	0	0	0	0	0	1	0	1	0	0	0	0	0	1	0	0	0	0	0	0	0	0	0	1	0	0	0	0	0	0	0	0	0
OTU_1042	Chordata	Actinopteri	Perciformes	Percidae	Perca		96.988	Midori2	GCGGTTATACGAGAGGCCCAAGTTGATAGACATCGGCGTAAAGCGTGGTTAAGATTAAAGACAATACTAAAGCCGAACACCTTCAGAGCTGTTATACGCATCCGAAGGTAAGAAGACCCCTCACGAAAGTGGCTTTATAGCCCCTGAACCCACGAAAGCTACGATA	0	1	0	0	0	0	0	1	0	0	0	1	0	0	0	1	2	1	2	2	0	2	1	0	0	0	0	0	0	1	1	0	0	0	0	1	0	0	0	0
OTU_1043	Chordata	Actinopteri	Perciformes	Percidae	Perca		96.875	Midori2	GCGGTTAAACGAGAGGCCCTAGTTGATAGACATCGGCGTAAAGCGTGGTTAAGATTAAAGACAATACTAAAGCCGAACACCTTCAGAGCTGTTATACGTATCCGAAGGTAAGAAGTTCAACCACGAAAGTGGCTTTATTACCCCTGAACCCACGAAAGCTGAGAAA	1	1	0	0	0	0	1	0	0	1	0	0	0	0	5	1	0	3	3	0	0	0	0	0	1	0	2	0	1	0	0	1	0	1	0	0	0	0	0	0
OTU_1044	Chordata	Actinopteri	Perciformes	Percidae			90.643	Midori2	GCGGTCATACAAGAGACCCAAATCAACTGTCCTACAAGCGGCGTAAAGAGTGGTTAAGATTAAAGACAATACTAAAGCCGAACACCTTCAGAGCTGTTATACGCATCCGAAGGTAAGAAGTTCAACCACGAAAGTGGCTTTATAGCCCCTGAACCCACGAAAGCTACGATA	0	0	4	0	0	0	0	0	0	0	0	0	0	0	0	0	0	0	0	0	0	0	0	0	0	1	0	1	0	0	0	0	0	3	0	1	0	0	0	0
OTU_1045	Chordata	Actinopteri	Cypriniformes	Leuciscidae	Leuciscus	Leuciscus leuciscus	97.661	Midori2	GCGGTTAAATGAGAGGCCCTAGTTGATGATACACGGCGTAAAGGGTGGTTAAGGAAAGCACAATAATAAAGCCAAATGGCCCTTTGGCTGTCATACGCTCCTAGGTGTCCGAAGCCCAATATACGAAAGTAGCTTTAATAAAGCCCACCTGACCCCACGAAAGCTGAGAAA	42	36	76	53	51	0	0	48	24	16	38	2	46	60	5	35	0	60	23	2	0	3	0	2	33	25	38	10	21	17	39	11	80	67	1	5	32	20	0	0
OTU_1046	Chordata	Actinopteri	Cypriniformes				96.471	Midori2	GCGGTTAAACGAGAGGCCCTAGTTAATATTACAACGGCGTAAAGGGTGGTTAAGGATATAAAAAATAAAGTCAAATGGCCCCTTGGCCGTCATACGCTTCTAGGAGTCCGAAGCCCTAATACGAAAGTAGCTTTAATAAAGCCCACCTGACCCCACGAAAGCTGAGAAA	0	0	1	0	0	0	0	3	3	0	0	5	2	3	3	3	1	0	5	0	0	0	0	0	0	1	1	1	2	3	3	2	5	6	0	2	1	0	0	0
OTU_1047	Chordata	Actinopteri	Cypriniformes	Leuciscidae	Alburnus	Alburnus alburnus	97.122	Midori2	GCGGTTGAACGAGGGGCCCTAGTTAATAATACGCGGCGTAAAGGGTGGTTAAGGAAAGCATAACAATAAAGCCGAATGGCCCTTTGGCTGTCATACGCTTCTAGGTGTCCGAAGTTCAACATACGAAAGTAGCTTTAATTTTCATGAAGCCACGAAAGCTAGGAAA	4	4	31	17	9	29	23	12	5	3	24	23	20	9	8	21	27	11	7	25	16	4	21	8	10	4	15	10	6	12	10	16	43	8	15	5	11	13	0	0
OTU_1048	Chordata	Actinopteri	Perciformes	Percidae	Sander		96.97	Midori2	GCGGTTATACGAGAGGCCCAAGTTGATAGACATCGGCGTAAAGCGTGGTTAAGACAAAAACAAAACTAAGGCCGAACACCTTCAGAGCTGTTATACGCACCCGAAGGTAAGAAATTCAACCACGAAAGTGGCTTTATAGCCCCTGAGCCCACGAAAGCTACGATA	2	0	1	0	1	0	2	1	0	0	1	3	0	0	1	3	4	1	0	2	0	0	0	0	0	0	5	0	0	2	0	1	1	0	0	2	0	0	0	0
OTU_1049	Chordata	Actinopteri	Cypriniformes	Leuciscidae	Rutilus	Rutilus rutilus	97.661	Midori2	GCGGTTAGACGAGAGGCCCCAGTTAATAATACACGGCGCAAAGGGTGGTTAAGGGAAGCACAATAATAAAGCCAAATGGCCCTTTGGCTGTCATACGCTTCTAGGTGCCCGAAGCCCAATATACGAAAGTAGCTTTAATAAAGCCCACCTGACCCCACGAAAGCTGAGAAA	0	2	0	2	1	1	45	3	9	7	3	125	39	6	2	13	3	3	4	0	0	0	2	5	5	2	3	1	0	0	2	5	3	32	2	1	2	1	0	0
OTU_1050	Chordata	Actinopteri	Gobiiformes	Gobiidae	Neogobius		96.988	Midori2	GCGGTTATACGAGAGGCCCAAGTTGACAAAAATCGCGAAAAACGTGGTTAGTGATATCACCTCCACTAAAGCCAAACACCTTCAAGGCTGTAATACGCCCCCGAAGACGGGAAGCCCAATCACGAAATTAGCTTTAATTTTCATTAAGCCACGAAAGCTAGGAAA	0	0	1	1	3	0	0	0	1	0	0	0	0	0	1	0	2	1	0	0	0	0	0	0	0	0	0	1	0	0	0	1	0	0	0	0	0	1	0	0
OTU_1051	Chordata	Actinopteri	Gobiiformes	Gobiidae	Neogobius		96.988	Midori2	GCGGTTATACAAGAGGCCCAAGTTGACAAAAATCGCGAAAAGCGTGGTTAGTGATATCACCTCCACTAAAGCCAAACACCTTCAAGTCTGTAATACGCCCCCGAGGACAGGAAGCCCAATCACGAAAGTAGCTTTAATTTTCATTAAGCCACGAAAGCTAGGAAA	1	0	0	0	0	0	0	0	1	0	0	0	0	0	0	0	0	0	0	1	0	0	0	0	0	0	0	0	0	0	0	0	0	0	0	0	0	1	0	0
OTU_1052	Chordata	Actinopteri	Perciformes	Percidae	Perca		96.988	Midori2	GCGGTTATACGAGAGGCCCAAGTTGATAGACATCGGCGTAAAGCGTGGTTAAGATTAAAGACAATACTAAAGCCGAACACCTTCAGAGCTGTTATACGCATCCGAAGGTAAGAAGCCCAATCACGAAAGTAGCTTTATAACCCCTGAACCCACGAAAGCTACGATA	2	2	1	3	1	2	0	0	1	0	1	0	0	1	2	0	1	1	1	3	0	2	1	0	1	4	4	2	0	3	0	1	5	1	6	0	1	0	0	0
OTU_1053	Chordata	Actinopteri	Cypriniformes	Leuciscidae			94.675	Midori2	GCGGTTAAACGAGAGGCCCTAGTTAATAATACACGGCGTAAAGGGTGGTTAAGGAAAGCATAACAATAAAGCCAAATGGCCCCTTGGCCGTCATACGCTTCTAGGTGTCCGAGGCCCTATATACGAAAGTAGCTTAAATTAACCCGCCTGACCCCACGAAAGCTGAGAGA	49	71	126	119	21	26	115	97	45	54	150	138	137	96	64	147	49	125	81	81	0	31	141	87	57	43	148	170	39	33	108	84	125	81	52	16	55	86	0	0
OTU_1054	Chordata	Actinopteri	Perciformes	Percidae	Sander		96.341	Midori2	TCGGTTAGACGAGAGGCCCTAGTTGATAGACATCGGCGTAAAGCGTGGTTAAGACAAAAACAAAACTAAAGCCGAACACCTTCAGAGCTTACGCACCCGAAGGTAAGAAGTTCAACCACGAAAGTGGCTTTATTACCCCTGAACCCACGAAAGCTACGATA	0	0	0	0	0	0	0	0	0	0	0	0	0	0	0	0	0	0	0	0	0	0	0	0	0	0	0	0	0	0	0	0	0	0	0	0	0	0	0	0
OTU_1055	Chordata	Actinopteri	Perciformes	Percidae			93.082	Midori2	GCGGTTATACGAGAGGCCCAAGTTGATAGACATCGGCGTAAAGCGTGGTTAAGATTAAAGACAAAACTAAAGCCGAACACCCCCAAAGCTGTTATACGCATCCGGAGGTGAGAAGTTCAACCACGAAGGTGGCTTTATCTAACCTGAACCCACGAAAGCCAGCA	33	28	24	24	7	15	7	7	5	15	11	21	19	15	25	8	10	18	33	5	0	9	36	15	7	5	60	18	16	19	12	10	27	5	22	20	26	46	0	0
OTU_1056	Chordata	Mammalia	Rodentia	Cricetidae	Microtus		95.732	Midori2	GCGGTTAAACGATTAACCCAAACTAATATTCTCGGCGTAAAACGTGTTACTAGAAATATGCAAAATAGAATTAAAATCCATCCAATAAAAAATTCATCGCTGGACCTAAAACCAATGACGAAAGTAATTCTAATAAGCCTGATACACGATAGCTAAGGTA	0	0	0	0	0	0	0	0	0	0	0	0	0	0	0	0	0	0	0	0	0	0	0	0	0	0	0	0	0	0	0	0	0	0	0	0	0	0	0	0
OTU_1057	Chordata	Actinopteri	Anguilliformes	Anguillidae	Anguilla		96.407	Midori2	GCGGTTATACGAGGGGCTCAAATTGATATTACACGGAGTAAGGCGTGATTaaaaaacaaaaaaaCTAAAGCCAAACACTTCCCCTGTCATACGCTACCGGAACATAAACGAAGCCCTATAACGAAAGAGCTTTAACACCTTTGAACTCACGACAGTTGAGGAA	0	0	0	0	0	0	0	0	0	0	0	0	0	0	0	0	0	0	0	0	1	0	0	0	0	0	0	0	0	0	0	0	0	0	0	0	0	0	0	0
OTU_1058	Chordata	Actinopteri	Perciformes	Percidae	Sander		95.783	Midori2	GCGGTTAAACGAGGGCCCCAGTTGATAACACCACGGCGTAAAGCGTGGTTAAGACAAAAACAAAACTAAAGCCGAACACCTTCAGAGCTGTTATACGCACCCGAAGGTAAGAAGTTCAACCACGAAAGTGGCTTTATTACCCCTGAACCCACGAAAGCTACGATA	7	10	1	18	4	2	6	28	13	8	24	5	5	6	8	24	16	14	14	19	9	0	4	1	21	5	21	25	4	22	33	25	39	6	10	20	14	8	0	0
OTU_1059	Chordata	Actinopteri	Perciformes	Percidae	Sander	Sander lucioperca	99.363	Midori2	GCGGTTATACGAGAGGCCCAAGTTGATAGACATCGGCGTAAAGCGTGGTTAAGACAAAAACAAAACTAAAGCCGAACACCTTCAGAGCTGTTATACGCACCCGAAGGTAAGAAGTTCAACCACGAAAGTGGCTTTATTACCCCTGAACCCACGACAGTTGAGGAA	0	2	2	1	0	0	4	3	0	1	0	1	0	0	0	1	0	3	1	0	1	0	0	0	3	0	3	0	0	0	1	2	0	3	0	0	0	1	0	0
OTU_1060	Chordata	Actinopteri	Perciformes	Gasterosteidae	Gasterosteus	Gasterosteus aculeatus	100	Midori2	GCGGTAATACGGGAGGGGCTAGCGTTATTCAGAATAATTGGGCGTAAAGAGTGGTTAAGCTAAAATTAAAACTAAAGCCGAACACCCCCAAAGCTGTTATACGCATCCGGAGGTGAGAAGTTCAACCACGAAGGTGGCTTTATCTAACCTGAACCCACGAAAGCTACGGCA	0	0	0	0	0	0	0	0	0	0	0	0	0	0	0	0	0	0	0	0	0	0	0	0	0	0	0	0	0	0	0	0	0	0	0	0	0	0	0	0
OTU_1061	Chordata	Actinopteri	Cypriniformes	Leuciscidae			93.567	Midori2	GCGTTTATACGAGGGGCTCAAATTGATATTACACGGCGTAAAGGGTGGTTAAGGAAAGCATAACAATAAAGCCGAATGGCCCTTTGGCTATCATACGCTTCTAGGTGTCCGAAGCCCAATATACGAGAGTAGCTTTAATAAAGCCCACCTGACCCCACAAAAGCTGAGAAA	0	0	0	1	0	0	0	0	0	1	0	0	0	0	0	0	0	0	0	0	1	0	0	0	0	0	0	0	0	0	0	0	0	0	0	0	0	0	0	0
OTU_1062	Chordata	Actinopteri	Perciformes	Percidae			90.419	Midori2	GCGGTTAAACGAGAGGCCCTAGTTAATAATACACGGCGTAAAGCGTGGTTAGTGATATCACCTCCACTAAAGCCGAACACCTTCAGAACTGTTATACGCACCCGAAGGTAAGAAGTTCAACCACGAAAGTGGCTTTATTACCCCTGAACCCACGAAAGCTACGATA	0	0	0	0	0	0	0	0	0	0	0	0	0	0	0	0	0	0	0	0	0	0	0	0	0	0	0	0	0	0	0	0	0	0	0	0	0	0	0	0
OTU_1063	Chordata	Actinopteri	Gobiiformes	Gobiidae	Neogobius		96.835	Midori2	GCGGTTATACGAGAGGCCCAAGTTGACAAAGATCGGCGTAAAGCGTGGTTAATGATAATTCCACTAAAGCCAAACACCTTCAAGGCTGTAATACGCCCCCGAAGACAGGACCCCAATCACGAAAGTAGCTTTAATTTTCATGAACCCACGAAAGCTAAAA	0	0	0	0	0	0	0	0	0	0	0	0	0	0	0	0	0	0	0	0	0	0	0	0	0	0	0	0	0	0	0	0	0	0	0	0	0	0	0	0
OTU_1064	Chordata	Actinopteri	Perciformes	Gasterosteidae	Gasterosteus	Gasterosteus aculeatus	98.101	Midori2	GCGGTTATACGAGAGGCCCAAGTTGATGAATTACGGCGTAAAGAGTGGTTAAGCTAAAATTAAAACTAAAAGCCGAACACCCCCAAAGCTGTTATACGCATCCGGAGGTGAGAAGTTCAACCACGAAGGTGGCTTTATCTAACCTGAACTCACGACAGTTGAGGAA	1	0	0	1	2	0	1	0	0	0	0	2	2	2	0	1	0	0	0	1	0	0	0	3	0	0	0	2	2	1	3	0	3	1	0	0	4	0	0	0
OTU_1065	Chordata	Actinopteri	Perciformes	Percidae	Perca		96.988	Midori2	GCTGTTATACGAGAGGCCCAAGTTGATAGACATCGGCGTAAAGCGTGGTTAAGATTAAATACTATACTAAAGCCGAACACCTTCAGAGCTGTTATACGCATCCGAGGGTAAGAAGTTCAACCACGAAAGTGGCCTTATAGCCCCTGAACCCACGAAAGCTACGATA	1	2	3	3	1	2	3	4	3	3	0	2	4	7	2	2	0	2	9	3	0	3	2	0	6	2	6	3	5	2	3	1	3	1	7	3	3	2	0	0
OTU_1066	Chordata	Actinopteri	Cypriniformes	Leuciscidae	Leuciscus		95.349	Midori2	GCGGTTAAACGAGAGGCCCCAGTTAATAATACACGGCGTAAAGGGTGGTTAAGAAAAGTATTAACAATAAAGCCGAATGGCCCTTTGGCTGTCATACGCTTCTTGTCCGAAGCCCAATATACGAAAGTAGCTTTAATAAAGTCCACCTGACCCCACGAAAGCTGAGAAA	0	2	3	1	0	0	1	0	0	0	1	0	1	0	0	0	2	1	0	0	0	0	0	2	0	1	0	1	1	0	2	1	0	2	1	2	1	0	0	0
OTU_1067	Chordata	Actinopteri	Gobiiformes	Gobiidae	Neogobius		96.97	Midori2	CGGTTATGCGAGAGGCCCAAGTTGACAAAAATCTGCGAAAAGCGTGGTTGGTGATATCACCTCCACTAAAGCCAAACACCTTCAAGGCTGTAATACGCCCCCGAAGGCAGGAAGCCCAATCACAAAAGTAGCTTTAATTTTCATGAAGCCACGAAAGCTAGGAAA	0	0	1	0	0	0	1	0	0	0	0	0	0	0	0	1	1	0	0	0	0	0	0	0	0	1	0	0	0	0	0	0	0	2	0	0	0	0	0	0
OTU_1068	Chordata	Actinopteri	Cypriniformes	Leuciscidae			90.058	Midori2	GCGGTTAAACGAGAGGCCCCAGTTAATAATACACGGCGTAAAGTATTAACAATAAAGCCGAATGGCCCTTTGGCTGTCATACGCTTCTAGGTGTCCGAAGCCCAATATACGAAAGTAGCTTTAATAAAGTCCACCTGACCCCACGAAAGCTGAGAAA	0	0	0	0	0	0	0	0	0	0	0	0	0	0	0	0	0	0	0	0	0	0	0	0	0	0	0	0	0	0	0	0	0	0	0	0	0	0	0	0
OTU_1069	Chordata	Actinopteri	Cypriniformes	Leuciscidae	Rutilus	Rutilus rutilus	97.661	Midori2	GCGGTTAAACGAGGGGCCCCAGTTAATAATACGCGGCGTAAAGGGTGGTTAAGGGAAGCACAATAATAAAGCCAAATGGCCCTTTGGCTGTCATACGCTTCTAGGTGTCCGAAGCCCAATATACGAAAGTAGCTTTAATAGAGCCCACCTGACCCCACGAAAGCTGAGAAA	4	6	20	19	8	23	13	11	9	12	14	18	27	5	3	33	28	22	17	15	2	19	20	3	9	6	7	3	0	17	8	5	31	40	11	3	23	18	0	0
OTU_1070	Chordata	Actinopteri	Cypriniformes	Leuciscidae	Leuciscus		95.906	Midori2	GCGGTTAAACGAGAGGCCCTAGTTGATAATACACGGCGTAAAGGGTGGTTAAGGAAAGCATAACAATAAAGTCGAATGGCCCCTTGGCTGTCATACGCACCTAGGTGTCCGAAGTTCAACATACGAAAGTAGCTTTAATAACGCCCACCTGACCCCACGAAAGCTGAGGAA	0	48	0	138	0	0	0	0	0	114	142	149	0	0	252	179	0	59	239	74	0	0	0	112	212	255	4	163	0	0	94	77	1	37	39	240	41	10	0	0
OTU_1071	Chordata	Actinopteri	Perciformes	Gasterosteidae	Gasterosteus		96.97	Midori2	GCGGTTATACGAGAGGCCCAATGAATTACGGCGTAAAGAGTGGTTAAGCTAAAATTAAAACTAAAGCCGAACACCCCCAAAGCTGTTATACGCATCCGGAGGTGAGAAGTTCAACCACGAAGGTGGCTTTATCTAACCTGAACCCACGAAAGCTACGGCA	0	0	0	0	0	0	0	0	0	0	0	0	0	0	0	0	0	0	0	0	0	0	0	0	0	0	0	0	0	0	0	0	0	0	0	0	0	0	0	0
OTU_1072	Chordata	Actinopteri	Cypriniformes	Cyprinidae			93.529	Midori2	GCGGTTAAACGAGAGGCCCCAGTTAATAATACACGGCGTAAAGGGTGGTTAAGGATAAATAATAATAAAGCCAAATGGCCCCTTGGCCGTCATACGCTCCTTGTCCGAGGCCCTATATACGAAAGTAGCTTTAATTAACCCTCCTGACCCCACGAAAACTGAGAAA	1	0	6	6	5	3	6	14	0	4	9	0	7	10	12	6	0	3	4	12	0	4	25	24	10	3	9	12	7	8	18	14	6	10	3	4	6	6	0	0
OTU_1073	Chordata	Actinopteri	Cypriniformes	Leuciscidae	Leuciscus		95.93	Midori2	GCGGTTAGACGAGAGGCCCTAGTTGATATTATAACGGCGTAAAGGGTGGTTAAGGAGAGCATAACAATAAAGCCGAATGGCCCTTTGGCTGTCATACGCTTCTAGGTGTCCGGAGCCCAATATACGAAAGTAGCTTTAATAAGGCCCACCTGACCCCACGAAAGCTGAGAAA	0	0	19	7	4	1	12	7	1	2	6	2	89	54	7	22	5	5	3	5	0	8	15	4	0	3	9	6	5	2	2	43	2	4	1	0	6	2	0	0
OTU_1074	Bacillariophyta	Coscinodiscophyceae	Thalassiosirales	Skeletonemataceae	Skeletonema		99.138	Midori2	GCGGTAAGACGGAGGATGCAAGTGTTATCCGGAATCACTGGGCGTAAAGCGTCTGTAGGTGGTTTAATAAGTCAACTGTTAAATCTTGAGGCTCAACTTCAAAACCGCAGTCGAAAGCACTTTACTGGGCTATTACTAACACTCAGAGACGAAAGCTAGGGTAG	0	0	0	0	0	0	0	0	0	0	0	0	0	0	0	0	0	0	0	0	0	0	0	0	0	0	0	0	0	0	0	0	0	0	0	0	0	0	0	0
OTU_1075	Chordata	Actinopteri	Cypriniformes	Leuciscidae			93.567	Midori2	GCGGTTATACGAGGGGCTCAAATTGATATTACACGGCGTAAAGGGTGGTTAAGGAAAGCATAACAATAAAGCCGAATGGCCCTTTGGCTGTCATACGCTTCTAGGTGTCCGAAGCCCTAATACGAAAGTAACTTTAATAAACCCACCTGACCCCACGAAAGCTGAGAAA	0	0	0	7	8	0	1	0	3	1	1	10	9	3	3	3	6	5	2	1	5	1	8	0	0	2	0	7	0	3	2	7	11	6	0	0	3	3	0	0
OTU_1076	Chordata	Actinopteri	Cypriniformes	Leuciscidae	Abramis		96.512	Midori2	GCGGTTAAACGAGAGGCCCCAGTTAATAATACGCGGCGTAAAGGGTGGTTAAGAAAAGTATTAACAATAAAGCCGAATGGCCCTTTGGCTGTCATACGCTTCTAAGTGTCCGAAGCCCAATATACGAAAGTAGCTTTAATAACGCCCACCTGACCCCACGAAAGCTGAGAAA	0	0	0	2	0	1	0	0	0	2	0	0	1	1	0	0	0	2	0	0	0	0	0	0	2	0	0	0	2	0	2	3	1	0	0	2	0	0	0	0
OTU_1077	Chordata	Actinopteri	Gobiiformes	Gobiidae			93.711	Midori2	GCGGTTATACGAGAGGCCCAAGTTGATAGACATCAGCGAAAAGCGTGGTTAGTGATATCACCTCCACTAAAGCCAAACACCTTCAAGGCTGTAATACGCCCCCGAAGACAGGAAGCCCAATCACGAAAGTAGCTTTATTACCCCTGAACCCACGAAAGCCACGATA	0	0	0	0	0	0	0	0	0	0	0	0	0	0	0	0	0	0	0	0	0	0	0	0	0	0	0	0	0	0	2	0	0	0	0	0	0	0	0	0
OTU_1078	Chordata	Actinopteri	Perciformes	Percidae			94.578	Midori2	GCGGTTAAACGAGAGGCCCTAGTTGATAGACATCGGCGTAAAGCGTGGTTAAGATTAAAGACAATACTAAAGCCAAACACCTTCAAGGCTGTAATACGCACCCGAAGGTAAGAAGTTCAACCACGAAAGTGGCTTTATTACCCCTGAACCCACGAAAGCTACGATA	0	0	0	0	0	1	0	0	0	0	0	0	0	0	0	0	0	0	0	0	0	0	0	0	0	0	0	0	0	0	0	0	0	0	0	0	0	0	0	0
OTU_1079	Chordata	Actinopteri	Cypriniformes	Leuciscidae	Leuciscus		95.349	Midori2	GCGGTTAAACGAGAGGCCCCAGTTAATAATACACGGCGTAAAGGGTGGTTAAGGAAAGTATTCACAATAAAGCCAAATGGCCCTTTGCTGTCATGCGCTTCTAGGTGTCCGAAGCCCAATATACGAAAGTAGCCTTAATAAAGCCCACCTGACCCCACGAAAGCTGAGAAA	0	0	1	0	0	0	0	0	0	0	0	0	0	0	0	0	0	1	0	0	0	0	0	0	0	0	0	0	0	0	0	0	1	0	0	0	0	0	0	0
OTU_1080	Chordata	Actinopteri	Gobiiformes	Gobiidae	Ponticola		96.341	Midori2	GCGGCTATACGAGAGGCCCAAGTTGACAAAAATCGGCGTAAAGCGTGGTTAATAACTAATTTACTAAAGCCAAACACCTTTAAGGCTGTTATACGCCCCCAAAGGTAGGAAGACCCCTCACGAAATTAGCTTTAATTACTATGAATCCACGAAAGCTAGGAAA	3	3	4	5	0	1	0	2	3	1	6	1	0	0	1	3	2	4	1	0	1	1	3	9	2	2	3	0	0	2	3	0	4	3	7	4	1	2	0	0
OTU_1081	Chordata	Actinopteri	Gobiiformes	Gobiidae	Neogobius		96.386	Midori2	GCGGTTAAACGAGAGGCCCTAGTTGATAGACATCGGCGAAAAGCGTGGTTAGTGATATCACCTCCACTAAAGCCAAACACCTTCAAGCCTGTAATACGCCCCCGAAGACAGGAAGCCCAATCACGAAAGTAGCTTTAATTTTCATGAAGCCACGAAAGCTAGGAAA	3	8	8	12	9	6	8	8	9	9	10	10	20	13	18	23	19	11	15	4	1	0	4	6	8	9	7	10	10	3	17	10	22	16	4	12	11	2	0	0
OTU_1082	Chordata	Actinopteri	Perciformes	Percidae			93.939	Midori2	GCGGTCATACGATAGACCCAAACTAATAAACCCCGGCGTAAAGCGTGGTTAAGACAAAAACAAAACTAAAGCCGAACACCTTCAGAACTGTTATACGCACCCGAAGGTAAGAAGTTCAACCACGAAAGTGGCTTTATTACCCCTGAACCCACGAAAGCTACGATA	0	0	1	1	0	0	0	0	0	0	0	0	3	0	0	0	0	0	1	0	0	0	0	0	0	1	0	1	0	0	0	0	0	0	0	0	0	0	0	0
OTU_1083	Chordata	Actinopteri	Cypriniformes	Leuciscidae			96.491	Midori2	GCGGTTAAACGAGGGGCCCTAGTTAATAATACGCGGCGTAAAGGTGGTTAAGGAAAGCATAACAATAAAGCCGAATGGCCCTTTGGCTGTCATACGCTTCTATGTGTCCGAAGCCCAATATACGAAAGTAGCTTTAATAAAATCCACCTGACCCCACGAAAGCTGAGAAA	0	0	168	51	21	233	61	45	0	1	128	100	89	0	0	44	153	75	4	25	101	0	105	0	0	0	11	0	2	84	25	18	136	0	121	25	74	134	0	0
OTU_1084	Chordata	Actinopteri	Perciformes	Percidae			92.771	Midori2	GCGGTTAAACGAGAGGCCCTAGTTAATAATACACGGCGTAAAGCGTGGTTAAGATTAAAGACAATACTAAAGCCGAACACCTTCAGAGCTGTTATACGCATCCGAAGGTAAGAAGTTCAACCACGAAAGTGGCTTTAATAACGCCCACCTGACCCCACGAAAGCTGAGAAA	2	0	0	0	0	1	0	1	0	0	1	1	1	0	0	0	0	0	0	0	0	0	0	0	0	0	1	0	0	0	1	0	0	2	0	0	0	0	0	0
OTU_1085	Chordata	Actinopteri					96.45	Midori2	GCGGTTAGACGAGAGGCCCTAGTTGATAGACATCGGCGTAAAGCGTGGTTAAGGACAAACAAAAATAAAGTCAAATGGCCCCTTGGCCGTCATACGCTTCTAGGCGTCCGAAGCCCTAATACGAAAGTAACTTTAATGAACCCACCTGACCCCACGAAAGCTGAGGAA	0	11	0	0	0	3	0	1	3	0	0	0	3	5	0	0	1	0	0	0	0	0	0	4	6	0	0	0	0	0	1	1	0	0	3	1	0	0	0	0
OTU_1086	Chordata	Actinopteri	Cypriniformes	Cyprinidae			96.951	Midori2	GCGGTTAGACGAGAGGCCCTAGTTGATATTATAACGGCGTAAAGGGTGGTTAGGGAAATAATAATAAAGCCAAATGGCCCCTTGGCCGTCATACGCTTCTAGGTGTCCGAGGCCCTATATACGAAAGTAGCTTTAATTAACCCCCTGACCCCACGAAAGCTACGATA	2	8	5	1	1	0	1	0	0	0	1	1	8	0	0	5	3	5	0	2	0	3	7	4	2	3	1	3	0	0	2	3	0	1	5	1	2	0	0	0
OTU_1087	Chordata	Actinopteri	Perciformes	Percidae	Perca		96.988	Midori2	GCGGTTATACGAGAGGCCCAAGTTGATAGACATTGGCGTAAAGCGTGGTTAAGATTAAAGACAATACTAAAGCCGAACACCTTCAGAGCTGTTATACGCATCCGAAGGTAAGAAGTTCAACCACGAATTGGCTTTATTACCCCTGAACCCACGAAAGCTACGATA	2	6	1	2	1	0	0	0	0	1	1	0	3	1	0	3	2	1	8	1	0	0	1	1	0	0	2	0	0	2	0	2	3	0	8	0	1	2	0	0
OTU_1088	Chordata	Actinopteri	Cypriniformes	Leuciscidae			94.767	Midori2	GCGGTTAGACGGCCCTAGTTGATATTATAACGGCGTAAAGGGTGGTTAAGGAGAGCATAACAATAAAGCCGAATGGCCCTTTGGCTGTCATACGCTTCTAGGTGTCCGAAGCCCAATATACGAAAGTAGCTTTAATAAAGCCCACCTGACCCCACGAAAGCTGAGAAA	4	7	25	12	0	4	20	19	6	10	14	11	36	11	28	42	3	20	29	14	0	18	24	14	8	8	20	39	6	6	21	18	15	23	12	1	11	8	0	0
OTU_1089	Chordata	Actinopteri	Gobiiformes	Gobiidae	Neogobius	Neogobius melanostomus	97.561	Midori2	GCGGTTAAACGAGAGGCTCAAGTTGACAAAAATCGGCGAAAGGCGTGGTTAGTGATATCACCTCCACTAAAGCCAAACACCTTCAAGGCTGTAATACGCCCCCGAAGACAGGAAGCCCAATCACAAAAGTAGCTTTAATTTTCATGAAGCCACGAAAGCTAGGATA	5	4	4	1	6	3	5	4	3	3	5	1	7	3	9	8	5	7	4	2	5	2	0	12	5	3	7	2	0	4	4	4	9	4	2	2	3	2	0	0
OTU_1090	Chordata	Actinopteri	Cypriniformes	Leuciscidae			90.361	Midori2	GCGGTTATACGAGAGGCCCAAGTTAATAATACACGGCGTAAAGGGTGGTTAAGGGAAGTATTAACAATAAAGCCGAATGGCCCTTTGGCTGTCATACGCTTCTAGGTGTCCGAAGTTCAACCACGAAAGTGGCTTTATTACCCCTGAACCCAAAAGCTACGATA	0	0	0	0	0	0	0	0	0	0	0	0	0	0	0	0	0	0	0	0	0	0	0	0	1	0	0	0	0	2	0	1	0	0	0	0	0	0	0	0
OTU_1091	Chordata	Actinopteri	Gobiiformes	Gobiidae	Neogobius		96.988	Midori2	GCGGTTATACGAGAGGCCCAAGTTGATAAAAATCGGCGAAAAGCGTGGTTAGTGACATCACCTCCACTAAGGCCAAACACCTTCAAGGCTGTAAAACGCCCCCGAAGACAGGAAGCCCAATCACGAAAGTAGCTTCAATTTTCATGAAGCCACGAAAGCTAGGAAA	0	0	0	0	0	0	0	0	0	0	0	0	0	0	0	0	0	0	1	0	0	0	0	0	0	0	0	0	0	0	0	0	0	0	0	0	1	0	0	0
OTU_1092	Chordata	Mammalia	Primates	Hominidae	Homo	Homo sapiens	97.006	Midori2	GCGGTGACACGACTAACCCAAGTCAATAGAACCCGGCGTAAAGAGTGTTTTAGGTCACCCCCTCCCCAATAAAGCTAAAACTCACCTGAGTTGTAAAAAACTCCAGTTGACACAAAATAGACTACGAAAGTGGCTTTAACATATTTGAACACACAATAGCTGAGACC	7	14	2	3	17	1	3	5	1	2	14	1	1	2	2	4	0	5	7	1	4	4	19	17	13	8	1	0	1	4	2	0	5	1	6	3	6	1	10	10
OTU_1093	Chordata	Actinopteri	Cypriniformes	Leuciscidae	Rutilus	Rutilus rutilus	97.661	Midori2	GCGGTTAAACGAGAGGCCCCAGTTAATAATACACGGCGTAAAGGGTGGTTAGGGGAAGCACAATAATAAAGCCAAATGGCCCTTTGGCTGTCATACGCTTCTAGGTGTCCGAAGCCCAATATACGAAAGTAGCTTTAATAACGCCCACCTGACCCCGCGAAAGCTGAGAAA	2	7	0	2	6	12	5	6	8	7	6	10	8	3	2	3	6	8	4	2	1	2	2	2	10	7	6	3	4	1	9	4	16	13	4	2	6	19	0	0
[truncated: 48 more columns]
