# Supplementary material for: Is it worth the extra mile? Comparing environmental DNA and RNA metabarcoding for vertebrate and invertebrate biodiversity surveys in a lowland stream
Source: PeerJ. 2024 Oct 24;12:e18016. doi: 10.7717/peerj.18016 (PMC11512801; doi:10.7717/peerj.18016)
Supplement: Supplemental Information 7 [file peerj-12-18016-s007.xlsx]

## Sheet: Sheet1
ID	Phylum	Class	Order	Family	Genus	Species	Similarity	Status	seq	LDNA_10_A	LDNA_10_B	LDNA_11_A	LDNA_11_B	LDNA_12_A	LDNA_12_B	LDNA_13_A	LDNA_13_B	LDNA_14_A	LDNA_14_B	LDNA_15_A	LDNA_15_B	LDNA_16_A	LDNA_16_B	LDNA_17_A	LDNA_17_B	LDNA_18_A	LDNA_18_B	LDNA_19_A	LDNA_19_B	LDNA_1_A	LDNA_1_B	LDNA_2_A	LDNA_2_B	LDNA_3_A	LDNA_3_B	LDNA_4_A	LDNA_4_B	LDNA_5_A	LDNA_5_B	LDNA_6_A	LDNA_6_B	LDNA_7_A	LDNA_7_B	LDNA_8_A	LDNA_8_B	LDNA_9_A	LDNA_9_B	LDNA_ENC_A	LDNA_ENC_B
OTU_1	Bacillariophyta	Mediophyceae	Stephanodiscales				89.05	Published	GCTATCGAGCGCAACCGCACATTCTGGAGGTTCTGTAGATTTAGCTATTTTTAGCCTGCATTTATCAGGCGCATCTTCTATATTAGGAGCTATTAATTTCATTTGTACAATCTTCAATATGCGAGTAAAAAGTTTATCTTTTCATAATTTACCATTATTTGTGTGGTCTGTTTTAATTACTGCTTTTTTATTGTTGTTATCATTG	948752	965354	810452	1024480	758853	1001849	854486	864390	623771	1104941	986366	864529	659268	770898	805512	1090710	784023	832606	951275	785876	438377	523924	765692	690092	917390	918474	917343	809507	742868	829768	670514	753033	719562	762653	703250	794208	712536	991464	2	6
OTU_2	Bacillariophyta	Mediophyceae	Thalassiosirales	Skeletonemataceae			91.18	Published	GTTGTCCAGTGCAACAGCTCACTCTGGCGGTTCTGTAGATTTGGCTATTTTTAGTTTACATTTATCTGGCGCTTCTTCTATTTTAGGTGCTATCAACTTTATTTGTACTATTTTCAATATGCGAGTAAAAAGTTTATCTTTTCATAATCTTCCTTTATTTGTATGGTCAGTTTTAATTACAGCATTTTTATTATTGTTATCGTTA	442763	444027	382713	486537	346355	430036	446367	445957	306883	562645	473995	401768	313407	372661	386280	512741	404429	441156	426440	359787	797730	927327	410094	378882	530814	520661	495904	436979	292478	332563	286908	338276	407857	397432	293641	334083	273285	389564	1	7
OTU_3	Bacillariophyta	Mediophyceae	Thalassiosirales	Skeletonemataceae	Skeletonema	Skeletonema costatum	98.53	Published	TTTATCAAGTGCAACAGCTCACTCTGGAGGTTCTGTAGATTTAGCAATATTTAGTTTACATTTATCAGGTGCGTCTTCTATTTTAGGTGCTATTAACTTCATTTGTACTATTTTTAATATGCGAGTAAAAAGTTTATCTTTTCATAATCTTCCTCTATTCGTATGATCTGTTTTAATAACAGCGTTTTTACTGTTATTATCTTTG	136282	135338	102910	125444	117228	137822	103505	106474	77287	126503	120926	77615	69149	80097	78472	105584	92952	93177	82656	71732	93935	104354	125370	115382	146996	137353	138776	119010	109535	115691	77851	87980	99224	107256	86732	99333	93401	116533	0	1
OTU_4	Rotifera	Monogononta	Ploima	Synchaetidae	Polyarthra	Polyarthra dolichoptera	99	Published	TCTAGCAGATGCTAAATATCATTCAGGTATTTCTGTTGATTTGGCGATTTTTAGTCTTCATTTAGCTGGAGTTTCTTCTATTTTAGGAAGAATTAATTTTTTAACTACTATTATTTGTTCTCGTACTACAAAATTGATTTCTATAGATCGTTTACCTTTGTTATTATGAGCAATTTCAGTTACAGCTGTATTGTTAATTACAAGATTA	22177	22785	44139	51094	90245	97686	45383	29302	26897	53409	29052	24459	124606	146450	80090	106540	21396	20355	57937	57250	24487	24524	8063	6676	2449	2240	49146	41554	111231	127155	45556	54687	16481	17977	49801	56913	69041	98493	0	0
OTU_5	Rotifera	Monogononta	Ploima	Synchaetidae	Polyarthra	Polyarthra vulgaris	99.5	Published	TCTTTCTGACTCTAAGTACCATTCAGGTATTTCAGTAGATTTAGCTATTTTTAGTCTTCATCTTGCTGGAGTTTCATCTATTCTCGGTAGAATTAATTTTCTTTCAACAATTATTTGCTCTCGAACAACTAAGATAATCTCTCTTGACCGTTTACCTTTATTCCTGTGATCTGTATCTATCACTGCTATTCTATTAATCACAAGATTA	2992	2429	6867	7234	9548	9535	10237	37484	35009	11924	39572	32104	42171	48244	50987	65936	37558	35888	46531	42907	11544	11291	1651	1437	390	347	4826	3887	7360	7550	10545	12070	45764	48965	5858	6606	5813	6032	0	1
OTU_6	Rotifera	Monogononta	Ploima	Synchaetidae	Synchaeta		96.92	Published	ATTATCTGATTCTAAATTTCATTCAGGTATTTCTGTTGATTTAGCTATTTTTAGCTTACATTTAGCTGGTATTTCTTCTATTTTAGGTAGTATTAACTTTATGACTACTATTATCTGTTCTCGTACAACTAAAATAATTAGTATAGATCGTTTACCTTTAATATTATGATCGTTAGGTGTAACAGCTTTTCTTTTATTAACTACTTTA	14840	14115	26501	30407	24691	25824	7852	20177	7396	8817	21283	5288	19905	22671	11007	14251	9721	9214	8984	8540	138	212	9325	8566	4502	3564	6397	5453	12417	13731	26309	31115	41402	43084	15623	17692	20402	24450	0	1
OTU_7	Rotifera	Monogononta	Ploima	Synchaetidae	Synchaeta	Synchaeta pectinata	98.97	Published	ATTATCTGATTCTAAATTTCATTCTGGTATTTCTGTTGATTTAGCTATTTTTAGTTTACACTTAGCTGGTATTTCTTCTATTTTAGGTAGTATTAATTTTATAACTACTATTATTTGTTCTCGTACAACAAAGATAATTAGTATAGATCGTTTACCACTAATGTTATGATCATTAGGTGTTACTGCCTTCTTATTACTAACTACTTTG	8154	7655	14859	16045	24574	23938	11610	9733	5525	12760	10369	3485	11641	13939	8618	11188	11086	9949	13124	12289	162	178	634	581	2815	2260	1144	849	4960	5314	14418	16253	29798	30958	7374	8153	12241	13080	0	3
OTU_8	Rotifera	Monogononta	Ploima	Brachionidae	Keratella		96.92	Published	TCTCTCCGACTCTAAGTATCATTCTGGTATTTCAGTTGACTTGGCTATTTTCAGTCTTCATTTAGCAGGAATTTCTTCCATTCTTGGTAGGATTAATTTTCTTACTACTATCATTTGCTCTCGCACAACTAAGGTTATCTCTCTTGATCGTATGCCTCTAATGCTTTGGGCTATTTCTGTTACTGCTGTTCTTTTAATTACTAGGTTG	16451	15555	32144	39766	75711	87064	26920	20705	21577	30736	23788	20217	64868	74648	23061	30313	57346	55316	45417	43400	7	1	2905	2178	5	11	9542	8392	3070	3435	57687	70021	33379	36801	33380	36697	44932	60082	0	0
OTU_9	Rotifera	Monogononta	Ploima	Synchaetidae	Synchaeta	Synchaeta oblonga	98.97	Published	ATTATCTGATTCTAAATTTCATTCTGGAATTTCTGTTGATCTTGCAATTTTTAGTCTTCATATTGCTGGTATTTCGTCTATTTTAGGGAGAATTAACTTTATGACTACTATTATTTGTTCTCGTACTACTAAAATAGTGAGAATAGATCGTCTTCCTTTAATAATTTGATCCTTAGGGGTAACAGCATTCCTTTTAGTAACAACTTTA	3245	2926	5976	6315	9504	8886	1275	3508	3676	1373	4027	2396	2245	2729	1607	2027	3811	3483	2299	2041	723	671	984	791	832	812	4634	3610	2805	3161	5140	5350	15595	16111	3772	4137	8397	9688	0	0
OTU_10	Rotifera	Monogononta	Ploima	Brachionidae	Brachionus		95.83	Published	CCTTTCTGACTCTACCTATCATAGAGGTGTTTCTGTTGATCTTGCTATTTTTAGTTTACATCTTTCTGGTGTTTCTTCAATTTTAGGTAGAATCAACTTTTTAACTACTATTATTTGTTCACGTACTACTAAAAGAATTTCTTTGGATCGTCTTCCTCTTATGTTATGATCTCTTGCTGTTACGGCTATTCTTTTAATTACTAGATTA	2273	2024	3273	3616	4856	4863	1175	3874	1036	1634	4086	716	2312	2483	2783	3252	3251	2949	657	552	1	0	363	379	0	0	638	457	836	924	10286	12008	3017	2928	5582	6172	4876	5791	0	1
OTU_11	Rotifera	Monogononta	Ploima	Synchaetidae	Polyarthra		95.31	Published	TCTGTCTGATGCTAAGTATCATTCTGGTATCTCTGTTGATCTTGCTATTTTCAGTCTTCATTTAGCTGGTGTCTCTTCTATTTTAGGTAGAATCAATTTTCTTACTACTATTGTGTGTTCTCGTACTACTAAGCTAATCTCTTTGGATCGTTTACCTTTATTGCTATGAGCTATCTCTATTACTGCTATCTTACTTATTACAAGACTT	6156	6073	662	792	5179	5298	6824	9846	11853	8123	10790	10721	7215	8217	8553	11283	9175	8274	10190	8833	26731	22575	2573	2629	377	345	1933	1575	2754	3054	340	281	15496	16903	1158	1272	8562	10075	0	0
OTU_12	Rotifera	Monogononta	Ploima	Synchaetidae	Polyarthra		95.31	Published	TCTCTCCGATTCTAAGTATCACTCTGGAATCTCTGTAGACCTAGCTATTTTCAGACTTCATCTAGCAGGTGTTTCTTCTATTCTTGGTAGAATTAACTTCCTTTCTACTATCATTTGTTCACGTACAACAAAACTTATTTCTCTAGATCGTCTCCCTCTTATGCTTTGAGCTATGTCTGTAACAGCTGTTCTTCTAGTTACTAGACTA	2211	2117	3653	3753	7548	7478	6625	15009	17391	8022	16518	14110	11978	13494	13236	17124	16574	15127	19885	18251	1729	1315	7258	6259	9807	8307	6825	5948	11232	11551	8128	9226	44968	48492	6929	8065	2398	2787	0	0
OTU_13	Rotifera	Monogononta	Ploima	Synchaetidae	Synchaeta		97.44	Published	TCTTTCAGATTCTAAATTTCATTCAGGAATTTCGGTAGATTTAGCTATTTTTAGTTTACATTTAGCTGGGATTTCTTCTATTATAGGAAGAATTAACTTTATAACTACTATTATTTGTTCTCGTACAACAAAAATAATTAGTATAGATCGTCTTCCTTTAATAATTTGATCTTTAGGTGTAACAGCTTTTCTTTTAGTTACTACATTA	1150	894	2410	2657	2608	2580	1975	2896	3548	1997	3614	2084	2223	2575	1443	1769	4526	4176	2466	2194	374	422	638	501	1013	714	1012	881	150	198	1179	1243	4015	4075	418	482	1285	1264	0	0
OTU_14	Annelida	Polychaeta	Spionida	Spionidae			92.12	Published	TTTATCTAGCGCTACAGCTCATTCAGGTGGTGCTGTAGATTTAGCTATTTTTAGTTTACATTTATCAGGTGCGTCATCTATTTTAGGTGCTATTAATTTTATTTGTACAATTTTTAATATGCGAGTGAAAAGTTTATCTTTCCACAATCTTCCATTATTCGTATGATCTGTTTTAATTACGGCATTTTTATTGTTATTATCTTTA	4821	4053	4336	4909	4090	4221	5382	4380	3412	5882	4664	2345	3117	3787	4049	5180	4297	4270	4158	3556	13130	15994	5711	5089	7692	6565	5829	4926	4642	4847	2870	3289	4737	4225	3013	3522	3215	3760	0	0
OTU_15	Bacillariophyta	Mediophyceae	Thalassiosirales				89.22	Published	ACTATCAAGTGCAACAGCACATTCCGGAGGTTCTGTAGATTTAGCTATTTTTAGTTTACATTTATCTGGTGCGTCTTCTATTTTAGGTGCTATTAATTTTATTTGTACAATTTTTAATATGCGAGTAAAAAGTCTATCTTTTCATAATTTACCGTTGTTTGTATGAGCTGTTTTAATTACTGCGTTTTTGTTATTATTATCGTTA	5088	4456	3897	4143	4167	4359	3803	3543	3212	3982	4321	2414	2892	3348	3029	3689	4032	3960	3907	3099	5918	6469	5533	4743	6381	5475	4821	4089	3977	4296	3315	3562	4118	3858	3389	3834	4437	4793	0	0
OTU_16	Bacillariophyta	Mediophyceae	Thalassiosirales				86.57	Published	GTTGTCTGGTGCTACGGCTCACTCTGGTGGTTCTGTGGATTTAGCTATATTTAGTTTACATTTATCAGGTGCGTCATCTATTTTAGGTGCCATTAACTTTATTTGTACAATCTTTAATATGCGAGTAAAAAGTTTATCTTTCCACAATCTTCCACTATTCGTATGGTCTGTTTTAATTACAGCATTTTTATTACTGCTGTCTTTA	5179	4548	4019	4402	4457	4560	4074	3828	3080	4828	4783	2284	2821	3166	2922	3601	3375	2910	3497	2883	5663	6161	5342	4366	6501	5711	5870	4332	3872	4173	3403	3573	4161	3858	3464	3831	4127	4521	0	0
OTU_17	Rotifera	Monogononta	Ploima	Synchaetidae	Synchaeta	Synchaeta pectinata	98.46	Published	ATTATCTGATTCTAAATTTCATTCTGGTATTTCTGTCGATTTAGCTATTTTTAGCTTACATTTAGCTGGTATTTCTTCTATTTTAGGTAGTATTAATTTTATAACTACTATTATTTGTTCTCGTACAACAAAGATAATCAGTATAGATCGTTTACCATTAATGTTATGATCACTAGGTGTTACTGCCTTTTTATTACTAACTACTTTG	351	421	2213	2244	3349	3497	4085	1760	1719	4516	1654	1105	2035	2468	1406	1821	1647	1545	1122	1070	2	0	373	294	564	444	495	383	216	216	3479	3937	3272	3293	1056	1186	2242	2205	0	0
OTU_18	Bacillariophyta	Mediophyceae	Stephanodiscales	Stephanodiscaceae			93.14	Published	GTTATCTAGTGCGACAGCTCATTCAGGTGGCTCTGTTGATTTAGCTATATTTAGTTTACATTTATCAGGCGCATCGTCTATTTTAGGTGCTATAAATTTTATTTGTACAATTTTTAATATGCGAGTGAAAAGTTTATCTTTTCATAACCTTCCACTATTTGTATGATCTGTTTTAATTACAGCGTTTTTATTATTGTTATCTTTA	5659	4842	4772	5233	4412	4977	5994	4713	3990	6478	5356	2802	3488	4302	4786	5590	4686	4638	4376	3865	15194	15899	6475	5744	8268	6751	7306	5803	4157	4284	3894	3987	5483	5190	4224	4439	4687	4697	0	0
OTU_19	Arthropoda	Insecta					74.51	Published	TTTATCTGATACTCCTTACCATGCTGGCCCTGCTGTTGACTTATCTATCTTAAGTTTACATATCGCTGGATTCTCTAGTCTTATGGGTGCTTTAAATTTAATTACTACTACTATTAACATGAGAGCTCCTGGTATGACTTTTGATAAATTACCTTTATTTGTTTGGGCTGTTTTCCTTACTGCTTGGTTACTTTTATTAGCTTTA	5718	5623	6362	7163	4829	5259	7641	5031	4480	8986	5687	2976	4351	5285	5888	7323	5130	4619	4776	4381	20832	29656	10207	9148	14055	12278	10374	8680	6606	6806	4938	5572	6726	6828	4932	5447	5505	6345	0	0
OTU_20	Bacillariophyta	Mediophyceae	Stephanodiscales	Stephanodiscaceae			91.04	Published	GTTATCGAGTGCAACAGCCCATTCGGGTGGTTCCGTAGATCTGGCTATATTTAGTCTTCATTTATCAGGTGCATCGTCTATTTTAGGTGCTATTAATTTTATTTGTACAATTTTTAATATGCGAGTAAAAAGTCTATCTTTTCATAACCTTCCATTATTTGTATGGTCTGTTTTAATTACCGCATTTTTACTACTGCTGTCTTTA	5262	4430	4051	4466	4559	5077	4419	3987	3101	4603	4207	2149	2845	3448	3239	4112	3961	3875	3436	3044	7372	8682	5644	4843	7300	5949	5431	4561	6404	6659	3164	3472	4390	3935	3092	3765	3773	4336	0	0
OTU_21	Arthropoda	Insecta	Megaloptera	Sialidae	Sialis	Sialis lutaria	100	Private	TTTCTAGAGCTATTGCTCATGCTGGGGCTTCAGTTGATTTAGCTATTTTTAGCCTCCATCTGGCAGGTGTATCTTCAATTTTAGGAGCAGTTAATTTTATTACTACAGTCATTAATATGCGAGCAAGAGGAATAACTTTAGATCGAATACCATTATTTGTCTGATCAGTAGTTATTACTGCTATTTTATTACTTTTATCCTTA	0	0	1	0	0	1	0	0	0	0	0	0	0	0	0	0	0	0	0	0	0	1	0	0	0	78	0	0	4	0	0	0	0	0	0	0	0	0	0	238804
OTU_22	Arthropoda	Malacostraca	Amphipoda	Gammaridae	Gammarus	Gammarus pulex	99.02	Private	GTTGGCAGGTATCTCAGCTCATGGGGGTGGAGCGGTAGATCTAGCCATTTTTTCACTCCATTTAGCAGGGGCCTCCTCTATCCTAGGCGCTATTAATTTTATCTCTACTGTAATCAATTTACGTAGACCTGGTATATCTATAGACCAAACGCCTCTTTTTGTTTGGTCTGTCTTTATCACAGCTATCTTACTCCTATTATCCTTA	0	0	100	2	0	0	60	0	0	77	0	0	0	0	0	0	0	0	39	0	1	0	0	0	164	31	0	111	0	1	0	0	0	0	78	0	0	1	0	223608
OTU_23	Rotifera	Monogononta	Ploima	Brachionidae	Keratella		97.92	Published	CCTCTCCGACTCTAAGTATCATTCTGGTATTTCAGTTGACTTAGCTATTTTCAGTCTTCATTTAGCAGGAATTTCTTCCATTCTTGGTAGGATTAATTTTCTTACTACTATCGTTTGCTCTCGCACAACTAAGGTTATCTCTCTTGATCGTATGCCTCTAATGCTTTGGGCTATCTCTGTCACTGCTATTCTTTTGATTACTAGGTTG	516	533	704	921	10080	13147	3684	485	3308	3652	450	3107	5764	6043	4384	5980	5992	5000	2517	2369	2	0	89	74	38	26	7271	5422	27	20	6604	8051	1182	1352	2185	2422	6705	9101	0	0
OTU_24	Rotifera	Monogononta	Ploima	Brachionidae	Keratella		96.95	Published	CCTCTCTGATTCTAAGTACCATTCCGGTATTTCAGTTGATCTTGCTATTTTTAGTCTTCATTTAGCAGGAATTTCTTCTATTCTTGGCAGAATTAATTTTCTTACTACCATTGTTTGCTCTCGTACTACTAAAGTCATTTCCCTTGATCGTATGCCTCTTATACTTTGAGCTATCTCAGTTACTGCTGTCCTTTTGATTACTAGATTG	8700	7181	4928	5272	9761	10254	8699	6084	4212	10466	7555	3342	15354	17576	5928	6718	9601	8597	3811	3583	1	0	899	465	563	597	4259	3659	1839	2002	14639	15780	9250	10539	2507	2808	7007	8110	0	0
OTU_25	Rotifera	Monogononta	Ploima	Synchaetidae	Synchaeta	Synchaeta pectinata	98.97	Published	TTTATCTGATTCTAAATTTCATTCTGGTATTTCTGTTGATTTAGCTATTTTCAGTTTACATTTAGCTGGAATTTCTTCTATTTTAGGTAGTATTAATTTCATAACTACTATTATTTGTTCTCGTACTACAAAAATAATTAGTATAGATCGTTTACCTTTAATACTATGATCTTTAGGTGTTACTGCTTTCTTATTATTAACTACTTTA	355	250	540	525	2075	2130	451	571	443	443	734	316	285	328	143	302	860	903	1605	1407	0	0	196	179	568	422	430	278	249	258	1396	1590	2156	1797	1163	1318	1366	1306	0	0
OTU_26	Rotifera	Monogononta	Ploima	Brachionidae	Keratella	Keratella cochlearis	100	Published	TTTGTCAGATTCTAAGTATCATTCAGGTATTTCCGTTGATTTAGCTATTTTTAGTCTTCATCTGGCTGGTATCTCTTCTATTTTGGGTAGGATTAACTTTCTTACTACTATCGTTTGCTGCCGTACAACAAAGGCTATTTCTTTGGATCGTATGCCTCTCATGCTGTGGGCTCTTTCTGTTACGGCTGTCTTGCTTATTACAAGGCTT	2384	2192	4707	5447	9633	10329	2740	2978	3788	3183	3190	2656	9571	10830	2492	3082	7155	6789	2944	2526	0	0	538	423	0	0	1063	799	3350	3416	5846	6603	6967	7205	4100	4759	6708	8521	0	0
OTU_27	Bacillariophyta	Mediophyceae	Thalassiosirales	Skeletonemataceae			90.69	Published	TTTATCTAGTGCAACAGCTCACTCTGGTGGTTCTGTAGATTTAGCAATTTTTAGTTTACATTTATCAGGTGCTTCATCTATTTTAGGCGCTATTAACTTTATTTGTACTATTTTTAATATGCGAGTAAAAAGTTTATCTTTTCATAATCTTCCTTTATTCGTATGGTCTGTACTAATTACAGCTTTTTTATTATTGTTATCTTTA	4296	3971	3497	3998	3959	4113	3959	3617	2878	4469	4164	2479	2631	3286	3036	4038	3833	3721	3443	2724	4595	6662	4705	4108	5901	4834	4914	4188	3591	3979	2852	3126	4151	3773	2867	3315	3238	3755	0	0
OTU_28	Bacillariophyta	Mediophyceae	Thalassiosirales	Skeletonemataceae			90.69	Published	TTTATCTAGTGCAACTGCTCATTCAGGTGGTTCTGTAGATTTAGCAATTTTTAGTTTACACTTATCTGGTGCATCTTCTATTTTAGGAGCTATCAATTTTATTTGTACAATTTTTAATATGCGAGTAAAAAGTTTATCTTTCCATAATCTTCCTTTATTTGTATGATCTGTTTTAATTACAGCATTTTTATTATTATTATCATTA	1685	1280	1230	1261	1582	1777	1167	1233	1094	1264	1459	826	1022	1142	887	1230	1270	1425	1229	890	1188	1482	1437	1286	2017	1478	1614	1467	1160	1233	1129	1206	1305	1223	998	1062	1266	1427	0	0
OTU_29	Rotifera	Monogononta	Ploima	Synchaetidae	Synchaeta	Synchaeta pectinata	98.46	Published	ATTATCTGATTCTAAATTTCATTCTGGTATTTCTGTGGATTTAGCTATTTTTAGCTTACATTTAGCTGGTATTTCTTCTATTTTAGGTAGTATTAATTTTATAACTACTATTATTTGTTCCCGTACAACAAAGATAATTAGTATAGATCGTTTACCACTAATGTTATGATCATTAGGTGTTACTGCTTTTTTACTACTAACTACTTTG	861	875	3033	3408	3	2	0	332	1280	1	334	722	1455	1491	320	451	1	1	504	662	4	0	0	0	1	0	1	2	67	117	3628	4004	2674	2988	0	1	1388	1284	0	0
OTU_30	Arthropoda	Collembola	Entomobryomorpha				85.07	Early-Release	ATTATCAGCAGGGATCGCCCATGCAGGAGCCTCAGTTGATTTATCAATTTTCAGTTTACACCTCGCAGGTGCTTCTTCAATCCTTGGGGCAGTTAATTTTATCACTACAATTATTAACATACGAACATCAGGCATAACCTGAGACCGAACCCCCCTATTCGTATGATCGGTATTCTTAACAGCAATTTTACTTCTTCTTTCATTA	2	0	2337	2319	118	180	13	0	7	7	1	1	5	0	0	0	1	0	2	1	257	148	12914	11595	461	373	1	1	1	2	21	23	1	0	4077	5041	30263	41993	0	0
OTU_31	Bacillariophyta	Mediophyceae	Thalassiosirales	Skeletonemataceae			90.69	Published	ACTATCAAGTGCAACTGCACATTCTGGAGGTTCTGTAGATTTAGCTATTTTTAGTTTACATTTATCTGGTGCGTCTTCTATTTTAGGTGCTATTAATTTTATTTGTACAATTTTTAATATGCGAGTAAAAAGTCTATCTTTTCATAATTTACCATTATTTGTATGATCTGTTTTAATTACTGCGTTTTTATTATTATTATCATTA	1701	1476	1357	1595	1265	1199	1675	1470	1238	1790	1506	909	1060	1216	1237	1676	1481	1569	1369	1144	2916	2559	2373	1901	2939	2362	2129	1852	1694	1812	1301	1559	1875	1677	1504	1725	1536	1755	0	0
OTU_32	Rotifera	Monogononta	Ploima	Synchaetidae	Polyarthra		95.91	Published	CCTATCTGACTCTAAGTTCCATTCTGGAATTTCTGTAGACCTTGCCATTTTTAGTTTACATCTTGCTGGTATCTCTTCTATTCTTGGTAGAATCAATTTTCTTTCTACAATTATTTGTTCTCGAACAACCAAGCTTGTTTCTCTAGATCGTCTTCCTCTGATGCTATGAGCTCTAGCTGTCACAGCAGTTCTGCTGGTTACTAGACTA	1986	2096	4419	5389	2617	3020	1279	2059	632	1776	2556	360	1536	2139	2202	2878	1206	1106	1813	1508	0	11	4619	3935	1506	1183	3108	2647	4314	4207	4204	4637	16950	16955	499	561	3363	3376	0	0
OTU_33	Ochrophyta	Phaeophyceae					78.92	Published	ACTATCAGGTATTCAAGCACATTCAGGACCTTCAGTAGATCTAGCTATTTTTAGTCTACACCTATCAGGTGCTTCATCAATTAGGGGAGCTATTAATTTTATTGTTACAATTTTCAATAGGCGTGCTCCAGGTATGTTTATGCATAAACTACCTCTATTTGTATGATCAGTACTAATTACAGCTTTCCTACTACTACTATCACTA	956	921	845	864	880	937	1371	762	687	1468	961	440	526	616	662	884	633	623	445	367	5309	6962	1431	1125	1956	1513	1850	1415	856	935	534	532	1073	883	675	788	626	665	0	0
OTU_34	Annelida	Polychaeta	Spionida	Spionidae			91.13	Published	ATTATCAAGTGCAACTGCACATTCTGGTGGTTCTGTAGACTTAGCTATTTTTAGTTTACATTTATCAGGTGCGTCTTCTATTTTAGGGGCTATTAATTTTATTTGTACAATTTTTAATATGCGAGTAAAAAGTCTATCTTTTCATAATTTACCATTATTTGTATGAGCTGTTTTAATTACTGCGTTTTTATTATTACTATCATTA	1841	1495	1494	1682	1575	1572	1599	1439	1179	1717	1631	852	1147	1217	1267	1710	1448	1409	1588	1307	1732	2062	2002	1705	2529	2135	2015	1767	1599	1600	1345	1407	1516	1461	1341	1533	1459	1682	0	0
OTU_35	Rotifera	Monogononta	Ploima	Brachionidae	Brachionus		97.92	Published	CCTTTCTGACTCTACCTATCATAGAGGTGTTTCTGTTGATCTTGCTATTTTTAGTTTACATCTTTCTGGTGTTTCTTCGATTTTAGGTAGAATTAACTTTTTAACTACTATTATTTGTTCACGCACTACTAAAAGTATTTCTTTGGACCGTCTTCCTCTTATGTTATGAGCTCTTGCTGTTACGGCTATTCTTTTAATTACTAGACTA	306	273	620	607	903	1226	411	659	57	462	632	30	178	198	456	546	861	794	154	139	1	0	9	4	18	16	57	62	44	36	447	588	270	282	411	439	1350	1639	0	0
OTU_36	Ochrophyta	Phaeophyceae					79.31	Published	ATTATCTGGAATTCAAGCGCACTCAGGACCTTCTGTAGATTTAGCTATTTTTAGCTTACATTTATCAGGAGCTAGTTCTATTATGGGATCTATTAATTTTATTGTAACAATCTTTAATATGAGAGCGCCAGGAATGTTTATGTATAAAATGCCACTTTTTGCATGAGCACTTCTTCTTACAGCATTCTTATTATTACTTTCTCTT	179	167	168	157	194	241	285	188	167	279	204	76	103	125	149	164	159	142	132	114	1582	1637	332	289	397	334	345	249	172	200	108	125	225	212	136	163	150	136	0	0
OTU_37	Basidiomycota						79.41	Private	ACTATCAGGAATTCAAGCACACTCAGGACCTTCAGTAGATCTAGCTATTTTTAGTCTACACCTATCAGGTGCTTCATCAATTAGGGGAGCTATTAACTTTATTGTTACAATTTTCAATAGGCGTGCTCCAGGTATGTTTATGCATAAACTACCACTATTTGTATGATCTATTCTAATTACAGCTTTCCTACTACTACTATCACTA	398	287	374	345	477	486	562	328	303	713	473	150	268	285	259	341	258	246	229	208	2658	3253	653	466	877	819	806	626	429	365	254	235	433	503	300	392	316	317	0	0
OTU_38	Bacillariophyta	Mediophyceae	Stephanodiscales	Stephanodiscaceae			92.54	Published	ATTGTCAAGCGCGACAGCTCATTCAGGCGGCTCTGTTGATTTAGCCATATTTAGTTTACATTTATCAGGCGCATCGTCTATCTTAGGTGCTATTAATTTTATTTGTACAATTTTTAACATGCGAGTAAAAAGTTTATCTTTTCATAACCTTCCATTATTTGTATGGTCTGTTCTAATTACAGCATTTTTATTATTACTATCTTTA	2543	2170	1858	2086	2372	2545	1923	1812	1417	2080	1909	1044	1537	1711	1442	1875	1779	1843	1723	1440	3207	3035	2631	2111	3226	2702	2512	2325	2905	2930	1538	1635	1927	1809	1529	1666	1940	2169	0	0
OTU_39	Annelida	Polychaeta	Spionida	Spionidae			90.15	Published	GTTATCAAGTGCAACTGCACATTCTGGAGGTTCTGTAGATTTAGCTATTTTTAGTTTACATTTATCTGGTATGTCTTCTATTTTAGGTGCTATTAATTTTATTTGTACAATTTTTAATATGCGAGTAAAAAGTTTATCTTTTCACAATTTACCGTTATTTGTATGAGCTGTTTTAATTACTGCGTTTTTGTTATTATTATCTTTA	653	541	484	605	646	639	470	495	507	489	563	345	376	431	348	438	455	469	530	436	581	745	721	629	856	637	687	597	546	639	469	550	575	485	423	512	589	713	0	0
OTU_40	Arthropoda	Insecta	Diptera	Chironomidae	Micropsectra	Micropsectra contracta	100	Early-Release	ACTATCTTCAAGAATTGCCCATAGAGGAGCCTCCGTTGATTTAGCTATCTTTTCTCTTCATTTAGCAGGTATCTCTTCAATTTTAGGGTCTGTAAATTTTATTACTACCGCCATTAATATACGATCTAATGGAATTACCTTAGATCGAATACCTTTATTTGTTTGATCAGTAATTATTACAACAATTTTACTTCTTCTTTCTTTA	0	0	0	0	1	0	0	0	0	0	0	0	0	0	0	0	0	1	0	0	0	0	0	156	139	0	10	0	0	0	0	0	0	0	0	0	0	0	65597	0
OTU_41	Rotifera	Monogononta	Ploima				89.58	Published	CCTCTCTGATTCAAAGTATCATAGAGGTATTTCCGTAGATTTGGCAATTTTTAGTCTTCACTTAGCAGGTATTTCTTCTATTTTAGGTAGAATTAACTTCATGACTACAGTTCTATGTTCTCGAACAACAAAGCTCATTTCTTTAGATCGTATACCATTAATGTTATGGGCTCTGTCTATTACGGCTCTTCTTCTCGTAACTAGTTTA	770	573	244	311	2053	2310	336	306	473	283	336	282	606	722	170	227	1709	1672	262	227	0	0	0	1	0	0	435	358	305	271	1141	1224	207	214	1293	1382	1139	1321	0	0
OTU_42	Ochrophyta	Raphidophyceae					79.49	Published	TTTAAGTAGTATACTTGCTCATTCTGGGCCTGCTGTAGATTTAGCAATTTTTAGTTTACATCTATCCGGGGCTGCTTCTATCCTTGGGGCTATTAATTTTATTACAACAGTGTTTAATATGAGATCACCAGGTTTACATTTTCATAGACTAACTTTATTAGTTTGGGCTTTATTAATAACTTCTTTTTTATTATTGCTTTCGTTG	962	856	665	804	750	836	920	707	596	1094	840	378	465	580	590	818	660	700	500	391	1932	1687	1063	903	1256	1015	1282	992	775	730	398	448	789	888	527	564	534	582	0	0
OTU_43	Arthropoda	Insecta					79.17	Published	ATTATCTAGTATCCAAGCGCATTCTGGGGCTTCGGTAGATTTAGCGATTTTTAGTTTACACTTAGCAGGTATTTCTTCTATTTTAGGGGCTGTTAATTTCATAACTACAATTCTAAACATGAGACCTGAAAAAATGAACATGCACCTATTACCTTTATTTGTTTGGGCGGTTTTAATTACTGCTGTATTATTATTACTATCTTTA	668	655	537	641	737	679	834	532	462	1003	714	305	392	471	474	652	521	502	451	321	5998	7220	1465	1123	1513	1308	1552	1337	628	630	452	468	829	719	515	586	615	553	0	0
OTU_44	Ochrophyta	Phaeophyceae					79.49	Published	TCTAAGTAGTATTCAAGCACATTCAGGACCTGCTGTAGATCTAGCAATTTTTAGTCTACATCTATCTGGTGCTTCATCTATTAGGGGAGCTATTAATTTTATTGTTACTATTATGAATATGCGTGCTCCTGGACTATTTAGGCATAAACTACCTCTTTATGTATGAGCCGTACTTATTACAGCTTTTCTACTACTTCTATCACTT	610	516	595	486	554	636	739	494	449	964	602	259	290	329	430	475	411	372	278	287	4173	4983	1093	865	1345	1161	1120	935	481	439	381	345	647	577	388	491	468	447	0	0
OTU_45	Heterokontophyta	Oomycota					77.44	Published	ATTATCAAGTATACAAGCACACTCAGGTGCAAGCGTAGATTTAGCTATATTTAGCTTACACTTAGCAGGTATATCATCAATATTAGGTGCAATTAACTTTATTTGTACTATTTTAAACATGAGAGGAGAAAAAGTATCTATGCATTTAATACCTTTATTCGTATGGGCTGTTTTAATTACAGCAGTTTTACTTTTACTTTCTTTA	492	405	340	462	410	588	633	436	378	590	514	203	282	347	367	483	376	348	342	244	2195	1858	671	596	712	592	647	671	487	502	317	292	468	495	324	377	427	400	0	0
OTU_46	Rotifera	Monogononta	Ploima	Brachionidae	Anuraeopsis		95.1	Published	TCTTTCTGACTCTAAATATCACAGGGGTGTATCCGTAGATTTAGCAATTTTTAGCCTTCACTTAGCAGGTATTTCTTCCATCCTTGGTAGTATCAACTTTATAACTACAGTTCTATGTTCACGAACAACAAAAATAATCTCTCTCGATCGCATGCCTTTAATGTTATGAGCTCTGTCTATTACTGCTCTTCTATTGGTTACTAGACTT	113	79	239	256	2398	2181	0	804	234	0	897	103	954	1053	691	877	581	392	246	217	0	0	0	0	0	0	419	347	128	115	550	650	861	1027	576	656	426	311	0	0
OTU_47	Rotifera	Monogononta	Ploima	Synchaetidae	Synchaeta		95.9	Published	ATTATCTGATTCTAAATTTCATTCTGGTATTTCTGTCGATTTAGCTATTTTTAGCTTACATTTAGCTGGTATTTCTTCTATTTTAGGTAGTATTAATTTTATAACTACTATTATTTGTTCTCGTACAACTAAAATAATTAGTATAGATCGTTTACCTTTAATATTATGATCATTAGGTGTAACAGCTTTTCTTTTACTAACTACTTTA	145	130	646	736	525	453	117	396	93	144	339	82	505	522	228	283	183	181	270	333	3	0	30	23	82	58	24	10	160	182	406	570	1057	1036	279	361	146	179	0	0
OTU_48	Heterokontophyta	Oomycota					75.49	Published	TTTAAGTGGTGTTTTTGCGCATTCTGGACCATCTGTAGATATAGCAATCTTTAGTTTACATTTAGCTGGTATTTCTTCAATAGCAGGTGCGATTAATTTTATTGTTACGATATTGAATATGAGATGTAGAGGTATGAGTTTTAATCGTTTACCTTTGTTTGTCTGAACTGTGTTGGTTACCGCAGTATTGTTACTGTTATCGTTA	551	502	580	579	592	590	877	530	620	1071	640	341	717	768	755	872	688	598	582	501	3182	3498	892	627	1164	933	1144	963	875	931	526	552	940	829	623	804	698	800	0	0
OTU_49	Heterokontophyta	Oomycota					83.82	Published	ATTATCAAGTGTTCAAGCTCATTCTGGGCCTTCAGTTGATTTAGCAATTTTTAGTTTACACTTATCAGGTGCATCTTCCATTTTAGGTTCTATTAATTTTATTACGACTATTTTTAACATGAGAGCTCCAGGTTTAACAATGCATAGATTGCCATTATTTGTTTGGGCTATTTTAATTACCGCATTTTTACTTCTGTTATCTTTA	317	258	290	255	292	335	375	233	283	384	329	144	177	202	249	305	249	229	197	147	1773	2699	514	439	711	456	492	492	302	321	172	139	346	273	233	248	205	242	0	0
OTU_50	Ochrophyta	Phaeophyceae					77.45	Published	ATTATCAGGAATTCAAGCCCACTCAGGACCTTCTGTAGATTTAGCTATTTTTAGCTTACATTTATCAGGAGCTAGTTCTATTATGGGATCAATCAATTTTATTGTGACAATCTTTAATATGAGAGCGCCAGGAATGTTTATGTACAAAATGCCACTTTTTGCATGAGCACTTCTTATCACAGCATTCTTATTATTACTTTCTCTT	118	102	94	103	123	154	174	131	95	213	133	42	58	70	103	128	116	95	44	49	699	973	205	154	251	193	198	181	174	141	87	76	124	119	87	75	95	75	0	0
OTU_51	Rotifera	Monogononta					84.04	Published	TTTATCAGATATTAAATATCATTCTGGTTCTTCAGTAGATATAGCAATTTTTAGTCTTCATCTAGCTGGTATTAGTTCAATTTTGGGATCTATTAACTTTATTAGTACAGTATTTGTAGCTCGTTCCTCTTCAAGGAATAAGCTTGATTATCTTCCCTTATTTTTGTGAGCTGTCACTATTACTGCAGTCTTATTAGTCACAAGTCTA	252	239	810	974	3956	3758	155	685	527	186	784	284	703	944	377	450	1277	1149	638	564	1	0	10	12	2	0	34	22	173	162	841	926	650	553	394	407	1879	1758	0	0
OTU_52	Heterokontophyta	Oomycota					82.46	Private	ACTTTCTAGCATAGGTTTCCACTCTGGAGGATCTGTTGACTTAGCTATTTTTAGCTTACACTTAGCAGGTATTTCTTCTATTTTAGGTACAGTTAATTTTATTACTACTATCTTTAATATGCGTGCTCCTGGTATGTCTATGCATAGATTACCTTTATTTGTTTGAGCTATCCTTATTACAGCCTTTTTACTTATTTTATCTCTA	341	268	297	362	296	286	406	256	270	379	320	149	180	229	260	338	266	274	212	171	1368	1450	465	471	605	511	448	463	264	281	203	198	388	332	224	234	247	244	0	0
OTU_53	Heterokontophyta	Oomycota					80.39	Published	TCTTTCAAGTATTGAATATCACTCTGGTGGTTCAGTAGATTTAGCTATTTTCAGTTTACATTTAGCGGGTATTAGTTCTATCTTAGGTGCTTCTAACTTTATTACTACTATTTTAAATATGAGAGCCCCTGGTATGACAATGCATAGATTACCTTTATTTGTATGAGCTGTATTTATTACAGCTATATTATTATTATTATCTTTA	529	413	464	444	413	428	653	429	371	685	505	300	342	356	431	490	412	591	403	289	4584	5015	993	840	1344	1056	1115	992	351	381	306	328	726	518	315	352	314	353	0	0
OTU_54	Arthropoda	Malacostraca	Amphipoda	Gammaridae	Gammarus	Gammarus fossarum	99.47	Published	TTAGCCGGCAACTCCGCACATAGCGGAAGCGCTGTAGATTTAGCTATTTTCTCTTTACACCTAGCCGGGGCTTCTTCCACTTTAGGTGCCATCAACTTTATTTCCACCGTCCTAAATATACGCAGACCCGGTATATCCATAGACCAAGCGCCTCTCTTTGTCTGGTCTATTTTTATTACCACTATCCTACTTCTGCTATCTCTA	0	0	81	0	48	133	0	0	0	0	3	1	0	163	149	61	0	0	1	0	4874	0	0	0	112	115	0	6	0	1	3	5	0	0	17	0	117	21	0	16321
OTU_55	Ochrophyta	Phaeophyceae					81.59	Published	TTTAAGTAGCATTTTGTCACATTCTGGTCCTTCTGTTGATTTAGCAATTTTTAGTTTACATTTATCAGGTGCTGCATCTATATTAGGTTCTATTAATTTTATAACTACTGTTTTTAATATGCGTTCTTCTGGATTAGATATGCATAGAATAGCATTATTTGTTTGGGCTCTTTTAATTACTTCTTTTTTATTACTTTTATCTTTA	644	572	585	591	614	656	735	579	433	867	627	260	264	399	450	552	496	484	369	356	1871	1821	956	860	1124	813	1099	842	514	528	319	374	657	666	438	436	449	484	0	0
OTU_56	Ochrophyta	Raphidophyceae					78.63	Published	ACTAAGTGGTATTCAAGCACATTCAGGACCTGCTGTTGATATGGCTATTTTTAGCCTACATCTATCAGGAGCTTCATCAATTATGGGAGCAATTAACTTTATTGTAACTATTTTCAATAGGCGTGCCCCTGGACTATTTAGGCATAAACTACCTCTATATGTATGAGCTGTTCTTATTACAGCTTTCCTACTACTTCTATCTCTT	649	516	555	543	624	648	802	490	466	885	609	282	288	337	414	492	427	368	353	317	3707	3239	1009	765	1119	948	948	968	386	364	373	388	650	534	440	519	435	375	0	0
OTU_57	Zygomycota						78.92	Private	ATTATCTAGTATAGAATATCATTCAGGGGGGTCTGTAGATTTAGCTATTTTTAGTCTACATTTAGCAGGTATTAGTTCAATCTTAGGGGCTTCAAATTTTATAACAACAATATTAAATATGAGAGCACCAGGTATGACAATGCATAGATTACCTCTATTTGTATGAGCAGTGTTAATTACAGCGGTACTTTTATTACTTTCTTTA	178	144	131	155	195	161	273	163	158	225	222	82	108	122	168	174	157	133	111	100	1196	821	295	250	445	302	292	270	129	128	123	89	213	180	117	161	182	127	0	0
OTU_58	Rotifera	Monogononta					84.48	Published	ACTCTCTGACTCTAAGTACCATAGTGGTATTTCTGTTGATCTGGCCATTTTCAGTCTTCACTTAGCTGGAATTTCATCCATTTTGGGTAGTATCAACTTTCTTACTACTATTTTGTGTTCTCGTACTACAAAAAGATTCTCTTTAGATCGTTTACCTTTAATGCTTTGAGCTATTGCAGTTACTGCTGTGCTTCTAATTACAAGTTTA	220	194	86	105	0	0	108	318	165	187	493	90	340	412	0	0	11	10	1	0	2221	1933	0	0	0	0	0	0	395	443	260	295	304	339	64	101	97	83	0	0
OTU_59	Heterokontophyta	Oomycota	Pythiales	Pythiaceae			92.16	Published	ATTATCAAGTGTTCAAGCACATTCAGGACCTTCAGTAGATTTAGCTATTTTTAGTTTACATTTAGCTGGTATTTCTTCTTTATTAGGTTCAATTAATTTTATCTCGACTATCTATAATATGAGAGCTCCAGGTTTAAGCTTTCATAGATTACCTTTATTTGTTTGGGCTATATTAGTAACAGTTTTTTTATTATTGTTAACTTTA	656	531	694	662	555	568	673	457	451	758	636	295	464	480	541	738	503	536	498	499	1390	1401	929	799	959	760	728	741	637	675	519	513	592	544	490	593	703	686	0	0
OTU_60	Ascomycota	Leotiomycetes	Leotiomycetes_order_Incertae_sedis	Leotiomycetes_family_incertae_sedis			92.16	Published	ATTAAGTGGAGTACAAAGTCACAGTGGACCAAGTGTTGATTTAGCCATCTTTGCCTTACACTTATCTGGTATAAGTAGTTTATTAGGTGCAGTTAATTTCATAACTACTATACTTAACATGAGAAGTCCAGGTATAAGATTACACAAATTAGCTTTATTTGGATGAGCGGTAGTTGTTACAGCTGTATTACTATTATTATCTTTA	589	434	533	429	464	549	515	450	401	664	563	230	519	458	475	602	453	408	471	397	461	632	707	593	978	754	721	601	488	477	359	409	513	579	463	596	827	707	0	0
OTU_61	Rotifera	Monogononta	Ploima	Brachionidae			94.68	Published	CCTTTCGACTCTACCTATCATAGGGGTGTTTCTGTTGATCTTGCTATTTTTAGTTTACATCTTTCTGGTGTTTCTTCAATTTTAGGTAGAATTAACTTTTTAACTACTATTATTTGTTCACGACTACTAAAAGTATTTCTTTGGATCGTCTTCCTCTTATGTTATGAGCTCTTGCTGTTACGGCTATTCTTTTAATTACTAGACTA	29	22	49	56	71	74	29	25	14	37	30	13	23	29	18	36	12	18	22	24	0	0	0	3	0	0	11	2	7	7	80	99	58	57	34	39	53	89	0	0
OTU_62	Arthropoda	Collembola	Entomobryomorpha	Isotomidae			100	Published	TCTATCGGCAGGTATCGCCCATGCTGGGGCTTCAGTTGATTTATCAATTTTCAGCCTTCATTTAGCGGGGGCCTCATCAATTTTAGGGGCCGTAAATTTTATTACCACAATTATTAATATACGAACAGCTGGAATAACATGAGACCGCACACCTCTATTTGTGTGGTCAGTATTTTTAACAGCTATCCTTCTCCTACTTTCTCTC	1	4	0	0	7356	7230	0	7	0	0	0	0	0	0	0	0	1	0	0	1	0	0	5	0	0	0	0	1	4	0	1	0	1	0	0	1	1270	1409	0	0
OTU_63	Bacillariophyta	Mediophyceae	Thalassiosirales				88.73	Published	ATTATCAAGTGCAACTGCGCATTCCGGAGGTTCTGTAGATTTAGCTATTTTTAGTTTACATTTATCTGGTGCGTCTTCTATTTTAGGTGCTATTAATTTTATTTGTACAATTTTTAATATGCGAGTAAAAAGTCTATCTTTCCATAATTTACCATTATTTGTGTGAGCTGTTTTAATTACTGCGTTTTTGTTATTATTATCATTA	415	454	334	352	391	392	304	337	257	344	392	246	276	388	255	333	379	369	347	316	495	529	529	442	664	514	435	398	397	424	335	356	408	374	300	356	418	481	0	0
OTU_64	Bacillariophyta	Mediophyceae	Thalassiosirales				87.75	Published	GTTATCAAGCGCAACAGCCCATTCCGGTGGTTCTGTTGATTTAGCGATTTTTAGTTTACATTTATCTGGTGCATCATCTATCTTAGGCGCGATTAATTTCATTTGTACAATTTTTAATATGCGAGTAAAGAGTTTATCTTTTCATAATCTTCCTTTGTTTGTGTGGTCTGTATTAATTACAGCGTTTTTATTATTATTATCATTA	209	202	159	158	294	289	454	394	328	564	468	227	120	153	171	188	282	323	255	185	670	682	320	267	552	390	285	267	472	496	312	359	454	350	312	316	248	287	0	0
OTU_65	Heterokontophyta	Oomycota					81.37	Published	TCTTTCAAGTATAGAATACCATTCTGGAGGTTCTGTAGATTTAGCTATCTTTAGTTTACATTTAGCAGGTATAAGTTCTATATTAGGTGCTTCTAATTTTATCACTACTATTTTAAACATGAGAGCCCCTGGTATGACTATGCATAGATTACCTTTATTTGTATGAGCTGTGTTTATTACTGCTATATTATTATTATTATCTTTA	289	187	209	205	220	179	392	275	187	332	248	150	151	180	250	247	265	312	211	123	1900	2336	444	417	475	478	537	417	136	125	177	160	381	263	164	147	118	155	0	0
OTU_66	Porifera	Demospongiae					78.65	Published	TTTATCTGATACACCTTATCATACAGGTGGTACAGTAGATTTAGCTATATTTAGTTTACATTTAGCAGGGTTTTCATCATTAATGGGAGCAATAAATTTAATAACAACAATAATTAATATGAGAGTAATGAAAATGGAAGAATTACCATTATTTGTATGGAGTGTATTAATAACAGCTTGGTTATTATTAATTTCATTA	448	403	511	436	381	382	540	346	339	544	398	162	282	255	261	429	273	241	307	273	3202	3377	931	818	1412	917	880	721	541	551	420	378	646	576	411	442	500	572	0	0
OTU_67	Rotifera	Monogononta	Ploima	Synchaetidae	Synchaeta	Synchaeta sp. WM-2017d	98.44	Published	TCTTTCAGATTCTAAATTTCACTCAGGTATTTCTGTTGATTTAGCTATTTTTAGCTTACATTTAGCTGGTATTTCTTCTATTTTAGGTAGTATTAATTTTATAACTACTATTATTTGTTCTCGTACAACTAAAATAATTAGTATAGATCGTTTACCTTTAATATTATGATCATTAGGTGTAACAGCTTTTCTTTTACTAACTACTTTA	929	854	2281	2483	1442	1418	416	928	334	515	1066	210	1114	1364	665	656	391	400	943	913	61	3	201	166	489	379	205	128	1044	1051	1008	1134	2574	2438	1215	1454	401	480	0	0
OTU_68	Bacillariophyta	Mediophyceae	Thalassiosirales				87.56	Published	GCTATCGAGCGCAACCGCACATTCTGGAGGTTCTGTAGATTTAGCTATTTTTAGTTTACATTTATCTGGCGCTTCTTCTATTTTAGGTGCTATCAACTTTATTTGTACTATTTTCAATATGCGAGTAAAAAGTTTATCTTTTCATAATTTACCATTATTTGTGTGGTCTGTTTTAATTACTGCTTTTTTATTGTTGTTATCATTG	896	881	798	977	638	716	814	985	572	949	887	934	598	816	835	1083	823	1075	1122	943	81	103	730	730	1012	1129	1097	918	742	1040	615	865	701	699	665	798	460	827	0	0
OTU_69	Rotifera	Monogononta	Ploima	Synchaetidae	Polyarthra		95.83	Published	TCTGGCAGATGCTAAATATCATTCAGGTATTTCTGTTGATTTGGCGATTTTTAGTCTTCATCTAGCTGGAGTTTCTTCTATTTTAGGAAGAATTAATTTTTTAACTACTATTTGTTCTCGTACTACAAAATTGATTTCTATGGATCGTTTACCTTTATTATTATGAGCAATTTCAGTTACAGCTGTATTGTTAATTACAAGATTA	504	503	10037	11321	7411	8062	11708	2569	49	12289	2825	73	12687	15008	5325	6502	2276	2256	6129	5397	8204	7411	3	1	6	2	3213	2433	4410	5456	2202	2531	4017	4221	3316	3874	15448	21222	0	0
OTU_70	Porifera	Demospongiae					81.09	Published	GTTATCTAGCATAGAGTACCACTCAGGAGGAGCGGTAGATCTAGGGATATTTAGCCTACACTTGGCAGGGATATCATCAATATTAGGGGCGATGAACTTTATAACAACAATAATCAACATGAGAGCACCAGGGATGACAATGCATAAACTACCATTGTTTGTTTGAGCAGTTTTAATAACAGCGGTATTACTACTATTGTCATTA	0	0	0	0	0	0	0	0	0	0	0	0	0	2	0	0	0	0	0	0	0	0	0	0	0	0	0	0	0	0	0	0	0	0	0	0	0	0	0	0
OTU_71	Bacillariophyta	Mediophyceae	Thalassiosirales				87.75	Published	GTTGTCCAGTGCAACAGCTCACTCTGGCGGTTCTGTAGATTTAGCTATTTTTAGCCTGCATTTATCAGGCGCATCTTCTATATTAGGAGCTATTAATTTCATTTGTACAATCTTCAATATGCGAGTAAAAAGTTTATCTTTTCATAATCTTCCTTTATTTGTATGGTCAGTTTTAATTACAGCATTTTTATTATTGTTATCGTTA	650	653	590	779	410	436	659	752	324	745	653	803	431	547	600	818	620	938	796	689	257	286	566	594	756	934	787	774	471	612	418	527	600	547	403	439	271	546	0	0
OTU_72	Rotifera	Monogononta	Ploima	Brachionidae	Keratella		97.4	Published	TCTGGCAGATGCTAAATATCATTCTGGTATTTCAGTTGACTTAGCTATTTTCAGTCTTCATTTAGCAGGAATTTCTTCCATTCTTGGTAGGATTAATTTTCTTACTACTATCATTTGCTCTCGCACAACTAAGGTTATCTCTCTTGATCGTATGCCTCTAATGCTTTGAGCTATTTCTGTTACTGCTGTTCTTTTAATTACTAGGTTG	56	64	214	229	632	778	54	240	144	71	180	194	617	783	468	591	293	301	473	416	0	1	7	4	0	1	107	86	87	116	243	301	210	187	351	435	393	607	0	0
OTU_73	Ochrophyta	Phaeophyceae					83.08	Published	TTTAAGCTCAGTTCAAGCACATTCAGGTCCTTCTGTTGATTTAGCAATTTTTAGTTTACACTTAGCAGGTGCTTCTTCTATTCTAGGTGCCATTAACTTTATTACTACTATTTTTAATATGCGTGCGCCTGGAATGTCTATGCACCGTTTACCTCTACTTGTTTGGGCGGTTTTAATTACCGCATTTCTTTTATTATTATCATTA	226	221	185	198	175	143	365	205	194	303	232	72	132	141	162	217	203	198	144	107	2197	1545	261	246	468	299	318	233	126	124	115	139	266	237	121	138	183	139	0	0
OTU_74	Arthropoda	Insecta					73.63	Published	ATTATCTGATACACCTTATCATGCTGGTCCTGCTGTGGATTTATCTATATTAAGTTTACATATTGCTGGATTCTCTAGTCTGATGGGTGCTTTAAACTTGATTACTACTACTATTAACATGAGAGCTCCTGGGATGACTTTTGATAAATTACCTTTATTTGTTTGGGCGATTTTCCTTACTGCTTGGTTACTTTTATTAGCTTTA	461	372	495	532	429	400	588	317	379	662	389	230	360	370	401	494	362	345	370	340	1687	2275	840	747	1140	1024	893	732	690	693	361	465	554	532	392	397	407	458	0	0
OTU_75	Arthropoda	Insecta	Coleoptera				85.78	Private	ATTATCTGGTATTACAGCACACTCTGGTGGTTCTGTTGATTTAGCAATTTTTAGTTTACATTTATCTGGTGTTTCTTCTATTGCTGGTTCTATCAATTTTATGACAACAATAATTAATATGCGTGTTAAaggtttaactttatatcgtttacctttatttatttgagcagtttttttaacagcatttttattAGTTTTAACTTTA	309	334	213	202	341	392	361	264	354	353	382	208	242	332	256	352	296	218	242	198	2606	2774	743	787	871	648	426	481	347	237	255	184	335	327	250	296	536	458	0	0
OTU_76	Rotifera	Monogononta	Ploima	Brachionidae	Brachionus	Brachionus calyciflorus	98.04	Published	TTTATCTGACTCAAGATATCACAGAGGTATTTCAGTAGACTTAGCTATTTTTAGACTTCATTTATCTGGTATTTCTTCTATTTTAGGTAGAATCAACTTTCTAACTACAATTATTTGTTCTCGTACAACAAAGAGAATTTCTTTAGATCGTTTACCTTTATTCCTATGAGCTGTTGCTGTAACAGCAATTTTACTAATTACTAGACTT	6	3	0	0	0	0	0	0	167	0	0	85	56	43	0	0	60	45	0	0	0	0	0	0	0	0	0	0	0	0	0	0	525	584	106	138	25	21	0	0
OTU_77	Arthropoda	Insecta					78.61	Published	TTTATCAGGCATTACTGCTCACTCAGGTGGTTCTGTTGATTTAGCTATTTTCAGTTTACATTTATCAGGTGTTTCTTCAATTGCAGGTTCAATTAATTTTATGACAACAATAATTAATATGCGTGTGAAAGGgttaactttatatcgtttacctttatttatttgagctgtttttttaactgcttttttattggttttaacttta	346	304	220	266	244	299	405	240	197	419	278	174	146	260	244	199	308	285	193	179	3008	3138	640	475	889	881	622	485	263	198	191	180	439	358	160	242	252	218	0	0
OTU_78	Rotifera	Monogononta	Ploima	Euchlanidae			94.87	Published	CCTCTCAGATTCTAAATATCACTCTGGCATTTCAGTAGATCTAGCCATTTTTAGTCTTCATTTAGCTGGTATCTCATCTATTTTAGGTAGTATCAATTTTTTGACTACTATTATTTGTTCTCGTACAGCAAAAGCTATTTCACTCGATCGTATGCCTCTTATGTTGTGAGCATTTGCTGTTACTTCTGTGCTCCTTGTTACTAGTCTC	0	5	2	5	2	1	10	1	2	9	7	0	1721	1804	0	24	6	12	0	1	1	313	1	4	12	33	15	10	1	0	0	1	5	0	7	7	4	5	0	0
OTU_79	Ochrophyta	Phaeophyceae					80.3	Published	TCTAAGTAGTATTCAAGCACATTCTGGACCATCAGTTGATCTTGCTATTTTTAGTCTTCATCTATCAGGTGCGTCTTCTATTATGGGTGCTATTAATTTTATTGCTACTATTTTCAATAGGCGTGCCCCAGGTATGTTTAGGCATAAAAGGCCACTTTTCGTTTGATCTGTACTTATTACAGCGTTCCTACTTCTTCTTTCTCTG	156	186	127	179	193	254	251	155	70	253	180	70	100	106	156	160	125	126	53	73	827	954	314	185	275	320	306	224	221	184	90	92	187	148	102	116	131	96	0	0
OTU_80	Ochrophyta	Raphidophyceae					82.91	Published	ATTAAGTTCTGTTCAAGCACATTCTGGACCATCTGTTGATTTGGCAATTTTTAGTCTTCATTTAGCAGGGGCTTCTTCAATTTTAGGAGCTATTAATTTTATTACTACCATTTTTAATATGCGAGCTCCAGGTATGTCAATGCATCGCCTACCTTTATTAGTTTGGGCTGTTTTGATTACAGCGTTTCTTCTTCTTTTATCATTA	149	150	142	125	126	130	155	129	134	182	135	63	74	100	112	135	105	90	75	53	1065	973	202	157	261	209	231	182	159	145	82	83	180	119	84	120	130	90	0	0
OTU_81	Bacillariophyta	Mediophyceae	Chaetocerotales	Chaetocerotaceae			92.16	Published	TTTATCTAGTGCAACAGCTCACTCTGGAGGAGCTGTAGATTTAGCTATTTTTAGTTTACACTTATCAGGAACTTCTTCTATTTTAGGTGCAATTAATTTTATTTGTACTATTTTTAATATGCGTGTAAAAAGTTTATCATTTCACAATCTTCCTTTATTTGTATGGTCAGTGTTAATTACTGCGTTTTTACTACTATTATCTTTA	351	292	151	193	110	134	161	112	160	148	174	100	67	92	68	67	178	179	119	144	633	496	285	316	494	456	265	251	208	197	155	145	254	208	225	197	217	220	0	0
OTU_82	Rotifera	Monogononta	Ploima	Synchaetidae	Polyarthra		97.95	Published	TCTGGCTGATGCTAAGTACCATTCTGGTATTTCTGTTGATCTTGCTATTTTCAGTCTTCATTTAGCTGGTATTTCTTCTATTTTAGGTAGAATCAATTTCCTTACTACTATTGTGTGTTCTCGTACTACTAAGCTAATCTCTTTAGATCGTTTACCTTTATTACTATGAGCTATCTCTATTACTGCTATCTTACTTATTACAAGACTT	0	2	0	0	0	0	10	233	1812	10	278	1475	1	2	1	0	138	64	0	1	0	0	0	1	0	0	0	0	296	274	0	0	1576	1746	72	74	0	5	0	0
OTU_83	Arthropoda	Insecta	Diptera	Chironomidae	Rheocricotopus	Rheocricotopus fuscipes	99.51	Private	TCTTTCATCAGGTATTGCTCATGCGGGGGGATCTGTGGATTTAGCAATTTTTTCCCTTCATTTAGCAGGAATTTCTTCTATTTTAGGGGCAGTAAATTTTATCACAACTGTAATTAATATACGATCTAACGGTATTACTCTAGATCGAATACCCCTATTCGTATGATCTGTAGTAATTACGGCAATTTTGCTTTTATTATCTTTA	0	0	0	0	0	0	0	0	0	2	0	0	0	0	0	0	0	0	0	0	10	3	0	0	0	0	1	0	0	0	0	0	0	0	0	0	0	0	0	0
OTU_84	Heterokontophyta	Oomycota					82.35	Private	ATTATCTAGTGGTCAAGCTCATTCAGGACCTTCTGTTGATTTAGCTATTTTTAGTTTACATATTGCAGGAGCATCTTCTATTTTAGGAGCAATTAATTTCATTGTAACTATTTTTAATATGCGTAGCCCAGGAATGTTTATGCATAAATTACCTTTATATGTATGATCAGTATTAATTACAGCATTTTTATTATTATTATCATTA	284	182	259	171	285	258	222	174	182	305	258	111	163	201	154	209	182	221	171	162	802	1187	366	335	464	265	348	291	257	241	184	128	288	183	149	181	253	212	0	0
OTU_85	Ochrophyta	Phaeophyceae					80.6	Private	TTTAAGTACTACTTTAACTCAGCCAGGCCCAGCAGTTGATCTAGCTATTTTTAGTTTACATTTATCAGGTGCAGCTTCAATATTAGGTTCAATTAATTTTATTACAACTGTATTTAATATGAGATTACCAGGTATGACTATGTATAGATTACCTTTATATGTATGATCTGTATTAATTACTTCATTTTTATTATTACTTTCTTTA	107	58	82	64	90	98	128	67	70	110	74	34	58	56	66	66	57	54	61	37	870	791	113	142	164	139	174	138	87	79	45	50	92	81	61	72	70	49	0	0
OTU_86	Arthropoda	Insecta					74.13	Published	TTTATCTGATACTCCTTATCATGCTGGTCCTGCTGTGGATTTATCTATCTTAAGTTTACATATCGCTGGATTCTCTAGTCTTATGGGTGCTTTAAATTAGATTACTACTACTATTAACATGAGAGCTCCGGGTATGACTTTTGATAAATTACCTTTATTTGTTTGGGCTGTTTTCCTTACTGCTTGGTTACTTTTATTAGCTTTA	372	387	420	462	337	339	543	351	245	595	325	160	296	324	366	494	321	295	263	336	1307	1441	892	732	1048	972	665	616	378	431	315	405	464	443	338	336	346	416	0	0
OTU_87	Rotifera	Monogononta	Ploima	Trichocercidae	Trichocerca		96.41	Published	CCTATCAGATTCAAAATACCACAGAGGTATTTCAGTCGACCTTGCAATTTTTAGTCTTCACATTGCCGGTGTTTCTTCTATTCTTGGTAGAATTAACTTCCTTACAACTATTATCTGTTCTCGTACAACTAAAATAATCTCTTTAGATCGTATGCCATTAATACTTTGAGCGTTAGCTGTTACAGCTATTCTTCTGATTACAAGACTT	57	51	304	305	479	318	0	52	93	0	57	61	68	112	232	301	63	33	297	197	0	0	0	0	236	294	165	154	43	42	491	513	585	491	677	660	653	592	0	0
OTU_88	Arthropoda	Insecta					78.35	Private	GTTATCGGTATTAGAGGACAAAGGAGTAGATTTTGCGATTTTTAGTTTACATTTAGCAGGGGTATCTTCATTATTAGGAGCAATAAATTTTATAACAACAATATTAAATATGCGTCATCCTGGTTTGCATTTACATATAACACCACTTTTTGCTTGAGCAGTTTTAGTTACTGCGTTTTTATTATTATTATCTTTA	507	432	352	320	574	544	242	146	218	267	171	147	17	41	65	60	104	120	134	162	2782	2396	130	66	118	62	522	517	160	177	87	62	315	338	307	370	461	306	0	0
OTU_89	Ochrophyta	Phaeophyceae					74.73	Published	ACTAAGTAGCATCCAAGCGCACTCTGGACCTTCTGTAGATCTTGCTATTTTTAGTCTACACATTTCTGGAGCATCTTCTATTAGGGGAGCTATTAACTTTATCGTTACAATTTTCAATAGGCGCGCTCCTGGACTATTTAGGCACAAAATCCCACTATTTGTGTGATCTGTGCTTATTACAGCATTCCTACTACTTCTATCTCTT	152	141	95	124	141	175	167	79	95	191	85	62	63	101	96	179	111	83	60	75	611	865	179	158	251	245	205	156	138	122	61	112	98	121	53	91	90	78	0	0
OTU_90	Heterokontophyta	Oomycota	Pythiales	Pythiaceae	Pythium	Pythium torulosum	99.51	Published	ATTATCAAGTGTACAAGCTCACTCTGGACCTTCAGTAGATTTAGCTATTTTTAGTTTACACTTATCTGGTATTTCATCATTATTAGGTGCTATTAATTTCTTATCAACTATATATAATATGAGAGCTCCTGGATTAAGTTTCCATAGATTACCATTATTCGTATGGTCTGTTTTTATTACAGCTTTCTTATTATTATTAACATTA	234	210	187	207	206	181	62	171	63	44	213	42	27	39	13	46	36	16	45	31	1309	1358	828	644	288	281	671	537	171	192	208	282	394	307	176	235	285	364	0	0
OTU_91	Rotifera	Monogononta	Ploima	Synchaetidae	Polyarthra		96.92	Published	TCTGTCAGATGCTAAATATCATTCAGGTATTTCTGTTGATTTAGCGATTTTTAGTCTTCATTTGGCTGGAGTTTCCTCTATTTTAGGAAGAATTAATTTTTTGACTACTATTATTTGTTCTCGTACTACAAAATTGATTTCTATGGATCGTTTACCATTATTACTATGAGCAATATCAGTTACTGCTGTGTTGTTAATTACAAGACTA	0	0	0	0	1079	1011	0	0	0	0	0	0	0	0	0	0	0	0	0	0	0	0	0	0	0	0	208	179	675	715	0	0	0	0	600	602	0	0	0	0
OTU_92	Arthropoda	Insecta	Odonata				88.24	Private	TCTTTCAGGAAATATTGCACATTCTGGGCCTGCTGTAGATTTAGCAATTTTTAGTTTACATATTTCTGGTGCTTCTTCTATTTTGGGATCAATTAATTTTATTATTACAATTACTAATATGCGTGCACGTGGTATGACAATGTATATGTTACCTTTATTTGCTTGATCTGTTTTAATTACTGCGTTTTTACTTGTTTTATCATTA	165	169	179	133	166	174	182	132	96	127	127	32	76	82	55	54	77	70	75	36	1779	1864	196	141	186	109	1187	905	295	326	197	190	364	357	199	209	172	155	0	0
OTU_93	Bacillariophyta	Bacillariophyceae					83.82	Published	ATTATCAGGTATCATTGCTCACTCTGGTGGTGCCGTTGATCTTGCAATTTTTAGTCTTCATTTGTCAGGTGCTGCATCAATTTTAGGAGCAATCAACTTTATCTGTACAATCGTAAACATGCGAACTGAGAGCTTACCGTTTCATAAGTTACCGTTATTTGTTTGGTCTGTTTTCATTACCGCAATTTTGTTACTATTATCTTTA	234	155	205	189	187	172	247	232	191	269	209	112	277	269	269	397	329	300	269	238	870	721	265	266	363	341	268	190	185	184	163	200	263	237	141	225	187	161	0	0
OTU_94	Ochrophyta	Phaeophyceae					80.88	Published	ATTATCTAGTGCTTTAGCACATTCAGGACCTTCTGTAGATTTAGCTATTTTTAGTTTACATTTAGCTGGAGCGGGATCAATTTTAGGTTCTATTAATTTTATAACAACTATTTTAAATATGCGTTTACCGGGTATGACTATGTATAGACTTCCTTTATTTGTATGATCAGTTTTTATAACATCTATTTTACTTTTACTTTCATTA	76	53	82	58	70	66	95	56	57	93	91	22	28	42	52	68	61	47	30	40	779	687	124	114	141	112	96	102	63	52	35	46	62	55	59	52	41	53	0	0
OTU_95	Bacillariophyta	Mediophyceae	Thalassiosirales	Skeletonemataceae			90.05	Published	GCTATCGAGCGCAACCGCACATTCTGGAGGTTCTGTAGATTTAGCAATATTTAGTTTACATTTATCAGGTGCGTCTTCTATTTTAGGTGCTATTAACTTCATTTGTACTATTTTTAATATGCGAGTAAAAAGTTTATCTTTTCATAATTTACCATTATTTGTGTGGTCTGTTTTAATTACTGCTTTTTTATTGTTGTTATCATTG	484	521	399	500	377	464	346	435	213	490	411	444	298	361	371	529	375	527	495	423	17	42	328	443	508	644	586	475	441	579	344	487	406	417	388	358	252	507	0	0
OTU_96	Rotifera	Monogononta	Ploima	Synchaetidae	Polyarthra		95.9	Published	TCTGGCAGATGCTAAATATCATTCAGGTATTTCTGTTGATTTGGCTATTTTTAGTCTTCATTTAGCTGGAGTTTCTTCTATTTTAGGGAGAATTAATTTTTTAACTACTATTATTTGTTCTCGTACTACAAAATTGATTTCCATGGATCGTTTACTTTTGTTATTATGAGCAATTTCAGTTACAGCTGTATTGTTAATTACAAGACTA	455	400	537	566	1688	1807	1174	992	215	1546	995	178	2882	3450	2844	3761	213	245	808	780	0	1	0	0	0	1	454	371	2099	2207	931	1193	94	141	935	1096	1802	2796	0	0
OTU_97	Ochrophyta	Raphidophyceae					76.62	Published	TCTAAGTAGCATCACTTCTCACTCTGGAGGAGCCGTAGATTTAGCAATTTTTAGTTTACACGTTTCTGGAGCTAGTAGTATCCTTGGAGCTATTAACTTTATTACTACCATTTTCAATATGAGAGCACCGGGTATGTCAATGCACCGTCTTCCATTATTTGTTTGGTCAGTATTAATTACAGCCTTCCTATTATTATTATCTTTA	106	126	131	110	137	114	135	101	102	153	97	52	64	62	87	108	89	85	79	56	629	964	167	144	277	134	173	161	139	101	67	59	136	123	92	95	68	104	0	0
OTU_98	Ochrophyta	Raphidophyceae					80.95	Published	ACTTTCAAGTGGAAATTCTCATTCAGGCCCTGCTGTAGACTTGGCTATTTTCAGTTTACATTTGTCTGGAGCAGCGTCTATTTTAGGTGCGATTAATTTTATATGCACTATTTTAAACATGAGAACTAAAGGTTTGTATATGCATAAATTGCCATTATTCGTTTGGTCTATTTTAATTACTGCAGTATTATTGTTGTTATCTTTA	163	136	111	101	179	166	280	199	205	283	235	102	72	98	100	152	175	191	161	133	1298	1022	312	245	623	423	267	248	246	223	254	266	279	308	102	117	193	179	0	0
OTU_99	Rhodophyta	Florideophyceae					78.43	Private	TTTAAGTTCTGTTTTAGCTCATTCAGGATGTGCCGTGGATTTAGCTATATTTAGTTTACATATAGCAGGTGTATCATCTATTGCTGGAGCTATTAATTTTATAGTAACTATTATAAATATGAGATGTCCTGGTTTATATTTTCGTAGATTACCTTTGTTTGTGTGATCTGTTTTTGTAACCGCTATTTTATTGTTATTATCATTA	71	71	129	109	40	30	24	55	31	63	48	14	38	15	32	37	15	40	12	24	2735	2717	530	456	144	152	100	29	46	27	52	53	136	87	53	58	111	109	0	0
OTU_100	Annelida	Polychaeta	Spionida	Spionidae			91.63	Published	GTTATCTGGTGCTACAGCTCATTCAGGTGGTTCTGTAGATTTAGCTATCTTTAGTTTACATTTATCAGGTGCGTCATCTATTTTAGGTGCTATTAATTTTATTTGTACCATTTTTAATATGCGAGTAAAAAGTTTATCTTTCCACAATCTTCCATTATTCGTATGATCTGTTTTAATTACAGCATTTTTATTGTTACTATCTTTA	204	169	134	203	206	159	190	148	153	196	189	77	97	127	144	186	121	166	153	137	249	270	210	210	252	246	207	141	146	187	136	138	144	125	122	112	130	156	0	0
OTU_101	Ochrophyta	Raphidophyceae					83.76	Published	TTTAAGTAGTATTTTAGCACATTCAGGTCCTGCTGTTGATTTAGCTATTTTTAGTTTACATTTATCAGGAGCTGCATCAATTTTAGGAGCAATTAATTTTATTACTACTGTTTTTAATATGCGTGCACCTGGATTACATTTTCATAGATTATCATTATTAGTTTGGGCATTACTAATTACTTCATTTTTATTATTACTTTCATTA	117	110	121	130	112	114	156	123	104	189	139	72	98	76	104	115	103	82	67	64	539	858	195	158	247	160	242	191	146	151	83	77	122	141	120	100	100	101	0	0
OTU_102	Cnidaria	Hydrozoa					79.6	Published	ATTATCATCAATTGAAAGTCATTCAGGAGGTTCTGTAGATTTAGCAATATTTAGTTTACATATTGCAGGTGCTTCTTCTATTTTAGGTGCTATGAATTTTATAACAACAGTTTTAAATATGAGAGTACCTGGTATGCAAATGCATAAAATTACATTATTTACATGAGCAATATTTATAACAGCAATATTATTATTATTATCATTA	55	41	65	48	61	57	60	64	54	138	83	25	34	56	65	87	49	96	82	56	848	1028	119	41	120	110	85	78	48	51	47	42	85	102	48	34	71	49	0	0
OTU_103	Heterokontophyta	Oomycota	Pythiales	Pythiaceae	Pythium		95.59	Published	TTTATCAAGTGTTCAAGCGCACTCAGGACCTTCTGTAGATTTAGCTATTTTTAGTTTACATTTATCAGGTATTTCATCATTATTAGGTGCTATTAATTTTCTTTCAACTATTTATAATATGAGAGCTCCTGGATTAAGTTTTCATAGATTACCTTTATTCGTTTGGGCTATTTTTATTACAGCTTTTTTATTATTATTAACTTTA	220	216	240	272	305	274	145	299	64	154	391	43	65	69	96	78	100	65	113	71	1149	1104	598	627	430	396	737	683	128	151	257	213	225	172	176	230	327	344	0	0
OTU_104	Heterokontophyta	Oomycota					80.88	Published	TCTATCAAGTATAGAGTATCACTCAGGTGGTTCTGTAGATTTAGCTATATTTAGTTTACATTTAGCAGGTATCAGCTCTATATTAGGTGCTTCTAACTTTATTACTACAATTTTAAATATGAGAGCCCCTGGTATGACTATGCATAGATTACCTTTATTTGTATGAGCTGTGTTTATTACAGCTATCTTATTATTATTATCTTTA	55	23	31	50	41	33	45	35	40	55	62	18	20	47	29	31	26	47	31	18	356	512	96	70	84	79	74	72	57	45	31	27	75	50	32	26	23	36	0	0
OTU_105	Bacillariophyta	Mediophyceae	Thalassiosirales	Skeletonemataceae	Skeletonema		95.1	Published	GTTGTCCAGTGCAACAGCTCACTCTGGCGGTTCTGTAGATTTAGCAATATTTAGTTTACATTTATCAGGTGCGTCTTCTATTTTAGGTGCTATTAACTTCATTTGTACTATTTTTAATATGCGAGTAAAAAGTTTATCTTTTCATAATCTTCCTCTATTCGTATGATCTGTTTTAATAACAGCGTTTTTATTATTGTTATCGTTA	2641	2540	2174	2398	1967	2221	2152	2447	1415	2553	2278	1793	1299	1689	1742	2294	2020	2348	1880	1821	2041	2406	2654	2387	3244	3190	3351	2787	1971	2319	1390	1773	2131	2201	1601	1847	1343	2016	0	0
OTU_106	Rotifera	Monogononta					78.79	Published	TCTTTCTGACTCTAAGTATCACAGAGGAATCTCTGTCGATTTAGCTATTTTTAGGCTACATTTAGCAGGAATCTCATCTATTTTAGGTAGAATTAATTTTCTTACAACTATTCTAGTTTCTCGTATGGATTCACTAATGAGACTTTCCCGTCTCCCTTTATTTTTATGATCAGTTGCAATCACGGCTGTTTTACTTATTGTTAGACTC	3	0	147	120	0	0	0	1	2	0	2	2	0	0	0	0	3	12	234	229	0	0	65	19	280	268	1968	1472	316	284	186	203	124	148	137	99	0	1	0	0
OTU_107	Ochrophyta	Phaeophyceae					78.84	Published	TCTAAGTAGTATTCAAGCCCATTCTGGACCATCTGTAGATCTAGCTATTTTCAGTCTACATCTATCAGGTGCATCATCTATTATGGGAGCGATTAACTTCATTGTTACGATTTTTAACATGCGAGCTCCTGGTCTATTTAGGCATAAACTACCTCTTTTTGTTTGAGCTGTTCTTATTACAGCCTTTCTACTACTACTATCACTT	214	221	126	204	217	196	244	167	153	240	217	78	116	128	124	183	148	131	132	84	1178	1371	296	314	440	344	416	322	241	210	109	96	159	214	166	146	146	141	0	0
OTU_108	Rotifera	Monogononta	Ploima	Brachionidae	Brachionus	Brachionus calyciflorus	98.51	Published	TCTATCTGATTCCAGATACCATAGAGGTATTTCAGTAGATTTAGCTATTTTTAGGCTTCATTTATCTGGTATTTCTTCTATTTTAGGTAGAATTAATTTTTTAACTACAATTATCTGTTCTCGTACAACAAAGAGAATTTCTTTAGATCGTTTGCCTTTATTCTTATGAGCTGTTGCTGTAACAGCAATTTTATTAATTACTAGGCTT	61	24	31	14	0	0	0	41	0	0	61	0	120	159	0	0	2	3	1	0	0	0	0	0	1	0	181	133	13	45	0	0	52	51	0	0	137	112	0	0
OTU_109	Ochrophyta	Phaeophyceae					80.6	Published	CTTAAGTAGTGCGCAAGCTCATTCAGGTCCGGCTGTTGATTTAGCTATATTTAGTCTACACCTAGCAGGTGCTGCTTCTATATTAGGCTCAATAAATTTCATAACAACTATTTTTAATATGCGTGCACCCGGTATGACAATGCACAGATTACCTTTATTTGTGTGGGCTGTATTAATAACATCATTTCTTCTTGTATTATCATTA	57	41	39	52	49	19	53	60	53	55	63	26	15	28	24	32	50	43	34	27	255	398	105	94	115	78	64	63	84	52	28	23	72	44	54	64	43	59	0	0
OTU_110	Mollusca	Gastropoda					76	Published	TTTAAGTAGTGTCTTAGGTCATCCTGGAGCTGCTGTAGATTGTGGTATTTTTAGTTTACATTTAGCTGGGGCATCCTCGTTAGCTGGTGCAATTAATTTTATTACAACAATTTTTAATATGCGTGCGCCGGGATTACAGTATTTTCGGTTACCATTATTTGTTTGATCTGTGTTAATTACTGCGTTTTTATTGTTATTATCCTTA	174	110	145	92	129	155	200	202	97	225	164	70	138	214	128	197	118	133	92	87	426	513	252	121	276	229	175	199	105	137	101	96	189	168	114	83	143	102	0	0
OTU_111	Rotifera	Monogononta	Ploima	Synchaetidae	Polyarthra		97.44	Published	TCTGGCAGATGCTAAATATCATTCAGGTATTTCTGTTGATTTGGCGATTTTTAGTCTACAGGATTTAGCTGGAGTTTCTTCTATTTTAGGAAGAATTAATTTTTTAACTACTATTATTTGTTCTCGTACTACAAAATTGATTTCTATGGATCGTTTACCTTTGTTATTATGAGCAATTTCAGTTACAGCTGTATTGTTAATTACAAGACTA	2179	2188	464	611	2231	2400	1743	657	396	2056	536	327	3321	3915	2199	2828	127	131	2630	2715	14	13	9	7	15	11	393	300	3205	3695	1934	2245	185	229	1144	1253	5484	6936	0	0
OTU_112	Mollusca	Gastropoda					76.62	Published	TTTAAGTACAACTTTAAGTCATCCGGGTCCCTCTATTGATCTAGCAATTTTTAGTTTACATCTAGCTGGTGCGGCTTCTATTCTAGGAGCCATTAATTTTATTACAACAGTAATGAATATGCGTTTACCTGGTTTAACAATGTATCGCTTACCTTTGTATGTTTGAGCTATTTTTATCACGTCTTTTTTATTAATTCTTTCACTG	113	114	114	61	119	122	133	69	74	87	95	40	73	56	60	71	62	57	76	54	890	1266	194	150	271	224	164	183	113	94	52	58	127	126	80	88	81	61	0	0
OTU_113	Rotifera	Monogononta					72.15	Published	TTTATCAGATTCTAAATTTCACACAGGTATTTCGGTAGACCTCGCCATTTTCAGGTTGCACCTAGCAGGTATCTCTTCCATCTTAGGAAGGATTAACTTTTTGACAACTATTTTAGTATCTCGCATATCTTCATCTCTAAGACTAGCTCGTCTGCCCTTATTTTTGTGGTCCGTTGCTATTACAGCGGTTTTATTAATTGTCAGTCTC	90	80	135	136	131	165	53	50	84	32	64	35	0	3	62	84	0	0	135	77	0	0	79	78	57	21	567	388	298	294	168	186	244	231	147	113	189	161	0	0
OTU_114	Ochrophyta	Raphidophyceae					76.58	Published	ACTTTCAGGTATATTAGCTCACTCAGGACCATCTGTAGACTTAGCTATTTTTAGTTTACATCTTTCAGGGGCAAGTTCAATTATGGGTTCAATTAATTTTATTGTAACTATTTTTAATATGCGTGCACCAGGTCTTTTTATGCATAAAATACCACTTTTTGTTTGAGCAGTATTAGTAACATCATTCCTTTTACTTTTATCACTC	102	84	92	76	142	106	140	60	63	143	89	31	45	54	57	76	86	50	51	34	420	1196	178	63	263	155	150	122	57	46	56	40	106	113	102	66	88	52	0	0
OTU_115	Ochrophyta	Phaeophyceae					78	Early-Release	ATTATCAGGAATTCAAGCACATTCAGGACCTTCTGTAGATTTAGCTATTTTTAGCTTACATTTATCAGGGGCAAGTTCAATTATGGGGTCAATTAATTTTATTGTAACTATTTTTAACATGCGCGCACCTGGAATGTTTATGCATAAACTTCCTCTTTTTGTATGAGCTGTACTTATTACAGTATTCTTATTATTACTCTCACTC	66	33	42	42	85	43	74	48	48	74	51	11	38	34	50	41	51	53	48	27	399	524	100	98	117	115	97	102	64	57	28	37	47	68	43	61	61	32	0	0
OTU_116	Arthropoda	Arachnida	Trombidiformes	Triophtydeidae	Triophytydeus		95.05	Early-Release	TTTATCTAGTCAATTATTTCATAGAGGTCAATCAGTAGACTTAACTATCTTCTCCCTTCATTTAGCTGGGATCTCATCAATTTTAGGAGCCATTAATTTTATCACAACTATTATTAATATACGATCCTCATCTTCTTCTTTTGAACGAATCCCCCTTTTTGTATGAAGAGTTCTCATTACTGCAGTTTTACTACTTCTCTCATTA	0	0	0	0	0	0	0	0	1659	0	0	886	0	0	0	0	0	1	0	0	0	0	0	0	0	0	0	0	1	0	0	0	0	6	0	0	0	0	0	0
OTU_117	Heterokontophyta	Oomycota					82.01	Published	ACTTTCAGCTTTACAAGCACATTCAGGTCCTTCTGTTGATTTAGCTATCTTTAGTTTTCACCTTTCAGGTACTAGCTCAATTTTAGGTTCTATTAATTTTATTGTAACTATTTTTAACATGAGAGCGCCAGGATTATTATTACATAAAATGCCTCTTTTTGTTTGATCTGTATTAGTTACTGTATTTTTATTATTATTATCTTTA	119	92	110	98	105	89	113	89	75	140	102	46	63	66	86	92	89	96	72	47	1184	1603	173	162	216	174	195	128	87	94	64	67	126	107	78	92	70	80	0	0
OTU_118	Porifera	Demospongiae					79.58	Published	ATTATCAGATACACCTTATCATACAGGAGGAACAGTAGATTTAGCAATATTTAGTTTACATTTAGCAGGTTTTTCATCATTAATGGGTGCTATAAATTTAATAACAACAATAATTAACATGAGAGTAATGAAAATGGAAGAATTACCATTATTTGTATGGAGTGTATTAATTACAGCTTGGTTATTATTAATATCATTA	162	114	200	209	275	229	218	201	224	300	203	110	204	199	210	290	231	233	230	212	264	182	147	175	277	219	215	196	306	301	158	172	185	181	248	227	318	319	0	0
OTU_119	Heterokontophyta	Oomycota	Pythiales	Pythiaceae	Pythium		96.57	Published	TTTATCAAGTGTTCAAGCCCACTCAGGACCTTCTGTAGATTTAGCTATTTTTAGTTTACACTTATCAGGTATTTCATCTTTATTAGGTGCTATTAATTTCTTATCTACTATTTATAATATGAGAGCTCCTGGTTTAAGTTTCCACAGATTACCTTTATTCGTTTGGTCTGTATTTATTACAGCTTTCTTATTATTATTAACATTA	192	150	121	118	122	131	112	108	58	100	120	24	25	40	62	50	51	79	41	44	1123	1094	716	550	514	375	493	428	128	131	138	129	134	128	102	157	213	181	0	0
OTU_120	Heterokontophyta	Oomycota	Pythiales	Pythiaceae			92.16	Published	ATTATCAAGTGTTCAAGCACACTCTGGGCCTTCAGTAGATTTAGCTATCTTTAGTTTACATTTAGCAGGTATTTCTTCTTTATTAGGTTCAATTAATTTTATTTCAACTATTTATAATATGAGAGCTCCTGGTTTAAATTTTCATAGATTACCTTTATTTGTTTGGGCTATATTAGTAACAGTTTTTTTATTATTATTAACTTTA	126	121	156	126	181	151	226	163	150	192	179	104	113	185	160	185	193	167	152	164	808	702	170	143	250	214	182	172	179	187	123	98	187	175	122	121	152	162	0	0
OTU_121	Rotifera	Monogononta	Ploima	Brachionidae			94.61	Published	TCTTTCTGACTCTAAATACCACAGAGGTGTATCCGTAGATTTAGCAATTTTTAGCCTTCATTTAGCAGGTATTTCTTCCATCCTTGGTAGTATTAACTTTATAACTACAGTTCTATGTTCACGAACAACAAAAATGATCTCTCTCGATCGCATGCCTTTAATGCTATGAGCTCTGTCTATTACTGCTCTTCTATTGGTTACTAGTCTT	0	0	401	345	0	0	0	0	133	0	0	112	0	0	275	404	333	229	0	0	0	0	0	0	0	0	0	0	0	0	0	0	0	0	9	26	156	172	0	0
OTU_122	Ochrophyta	Phaeophyceae					81.37	Published	ATTAAGTAGCGTTCAAGCTCATTCAGGCCCTGCTGTAGATTTAGCTATCTTTAGCTTGCACTTATCAGGAGCTGCCTCTATTTTAGGTGCCATTAATTTTATAACTACAGTTTTTAACATGAGAGCTCCAGGCTTAACCATGCATAGATTACCACTATATGTTTGGTCTATATTAGTTACTTCGTTTTTATTATTGTTATCTTTA	28	40	42	29	25	20	22	29	22	23	29	18	6	5	4	7	7	1	4	5	69	178	89	58	62	45	119	108	75	65	37	34	65	55	49	65	47	53	0	0
OTU_123	Bacillariophyta	Bacillariophyceae					77.94	Published	ATTATCTGGTATCACAGCACATTCTGGTGGTTCTGTTGATTTAGCAATTTTTAGTTTACATTTATCAGGTGTTTCTTCTATTGCTGGTTCAATCAACTTTATGACAACAATCATCAATATGAGAGTTAAAGGTTTAACTTTATACCGTTTACCTTTATTCATTTGATCTGTTTTTTTAACCGCTTTCTTATTAGTTTTAACTTTA	163	141	40	70	196	197	77	104	81	77	132	56	50	54	157	226	157	142	139	114	319	439	393	294	342	300	339	360	149	152	92	72	143	89	130	146	128	68	0	0
OTU_124	Cnidaria	Hydrozoa					75	Published	ATTATCATCAATCCAAGCACACTCAGGACCATCTGTAGATCTTGCTATTTTTAGTTTCCACCTTTCAGGAACAAGCTCTATTTTAGGTTCTATTAATTTTATTGTTACTATTTTTAATATGAGAGCACCAGGAATGTTTATGCACAAAATCCCACTTTTTGTTTGAGCAGTTCTTGTAACAACTTTCCTCTTACTCTTATCTTTA	109	103	110	94	122	144	189	82	71	137	128	48	53	70	79	103	107	95	56	72	740	845	201	138	240	188	182	149	135	139	66	53	107	133	80	98	91	102	0	0
OTU_125	Ochrophyta	Phaeophyceae					77.34	Published	ATTATCAGGAATTCAAGCGCACTCAGGACCTTCTGTAGATTTAGCTATTTTTAGTTTACATTTATCAGGGGCAAGTTCTATTATGGGATCAATCAATTTCATTGTGACAATCTTTAATATGAGAGCGCCAGGAATGTTTATGTACAAAATGCCACTTTTTGCATGAGCACTTCTTCTTACAGCATTCTTATTATTACTTTCTCTT	36	21	17	19	48	14	29	26	25	29	16	11	12	12	21	22	18	18	18	11	226	139	56	30	46	29	55	45	31	25	22	15	40	31	12	22	21	21	0	0
OTU_126	Rotifera	Monogononta	Ploima	Synchaetidae			94.76	Published	TCTGTCAGATTCAAAGTTCCATTCAGGTATCTCTGTAGATTTAGCCATCTTCAGGCTTCATTTGGCTGGGGTTTCTTCAATTTTAGGAAGAATCAACTTTCTAACTACTATTATTTGCTCACGTACAACTAAATTAGTGTCTTTAGACCGTCTTCCTCTTATACTCTGGGCTCTATCCGTTACTGCTGTTCTTCTAGTGACTAGACTT	66	41	34	18	320	286	79	290	48	128	394	31	326	364	117	153	10	7	59	52	4	0	0	0	0	0	522	451	230	235	162	140	156	136	56	71	347	319	0	0
OTU_127	No Match	No Match	No Match	No Match	No Match	No Match			ACTAAGTCTACTAGGGTCACATACTGGTGGGGCCGTAGATTGTGCTATTTTCTCTCTACACCTTGCGGGAATTAGTTCAATGCTGGGTGCTATGAATTTCATTACAACAGTACTAAATATGCGAAATCCTGGTATGAGTATACATAAGCTACCTCTGTTTGCTTGAGCGATTATAGTAACGGCGGTGCTGCTTCTGCTAAGTCTG	97	53	160	139	86	78	57	46	82	102	123	48	5	11	23	24	9	17	40	14	59	26	99	97	804	532	214	149	120	115	97	67	135	133	143	144	149	229	0	0
OTU_128	Arthropoda	Copepoda	Cyclopoida	Cyclopidae	Thermocyclops	Thermocyclops oithonoides	99.02	Published	TTTAAGGAGAAATTTATCTCATTCAGGGTCTTCAGTAGACTACGCGATTTTCTCTTTGCATCTTGCTGGGGTTTCTTCTATTTTAGGGGCTGTTAATTTTATTAGAACCCTAGGAAATATACGAACACTAGGAATGTTTTTAGATCGAACTCCCCTATTTGCTTGAGCCGTTTTAATCACCGCAATTTTACTGCTCCTTTCCTTG	0	0	0	0	398	383	0	0	1318	0	0	702	267	232	0	0	664	619	0	0	0	0	0	0	0	0	0	0	0	0	286	321	0	0	464	493	0	0	0	0
OTU_129	Arthropoda	Copepoda	Cyclopoida	Cyclopidae	Mesocyclops	Mesocyclops leuckarti	99.51	Published	CTTAAGAAGAAACTTATCTCACTCTGGGTCTTCGGTAGATTATGCTATTTTTTCCCTTCATTTAGCGGGTGTGTCTTCTATTCTAGGGGCAGTTAACTTTATTAGTACAATTGGTAATATGCGGACCTTAGGGATATTTTTAGATCGTACACCTTTATTTGCCTGAGCGGTTTTAATCACTGCTATTTTGCTTTTATTGTCTCTA	0	0	0	0	0	4	0	303	0	0	405	0	584	658	1	0	375	338	405	270	0	0	0	0	0	0	3	0	1344	1338	0	0	0	0	0	0	1	0	0	0
OTU_130	Basidiomycota	Agaricomycetes					76.12	Published	TTTATCTGATACTCCTTTCCATTCTGGTCCTGCTGTAGATTTATCTATTTTAAGTTTACATATTGCTGGATTTTCTAGTTTAATGGGTGCTTTAAATTTAATTACTACTACTATCAATATGAGAGCTCCTGGTATGACTTTCGATAAATTACCTCTTTTTGTTTGGGCTGTTTTCTTAACTGCTTGGTTATTATTATTAGCTTTA	274	215	140	202	196	200	246	193	162	245	213	99	259	294	324	385	303	298	275	266	475	635	285	221	290	256	216	251	173	157	135	108	196	168	156	207	212	175	0	0
OTU_131	Arthropoda	Arachnida	Trombidiformes	Penthaleidae			90.2	Published	TTTATCAAATCAAATATTTCATAATGGAAGATCAGTAGATTTAACAATTTTTTCATTACACATAGCAGGAGTATCATCTATTTTAGGAGCTATTAATTTTATTACAACTATTTTTAACATACGCCCCAAAATAATATCTTTTGAACGAATCCCATTATTTGTATGATCTGTAATAATTACAGCAGTATTATTATTACTATCATTA	2508	2278	0	0	0	2	16	3	0	3	6	1	1	0	5	12	0	0	0	0	0	0	5	2	3	0	7	0	0	3	3	1	0	0	0	3	946	890	0	0
OTU_132	Rotifera	Monogononta	Ploima	Brachionidae	Keratella	Keratella cochlearis	98.53	Published	ACTATCTGATTCTAAGTACCATTCTGGTATTTCTGTTGATTTGGCTATTTTTAGTCTTCACTTAGCTGGTATCTCTTCTATTTTAGGTAGAATTAACTTTCTTACTACTATCGTTTGCTCTCGCACTACTAAGAGTATTTCATTAGATCGTATGCCTCTTATGCTTTGAGCTCTTTCCGTAACTGCTATTTTACTCATTACTAGTTTG	0	0	97	70	71	72	1466	506	4	1611	588	4	65	93	77	44	0	0	0	0	0	0	0	0	0	0	0	0	1	0	120	107	0	0	37	61	29	44	0	0
OTU_133	Basidiomycota	Agaricomycetes					75.25	Published	ATTGTCTAGCATCGGATTCCACTCTGGAGGTTCTGTTGACCTAGCTATTTTCAGCTTACACCTATCCGGAATATCTTCTATTTTAGGTACAGTTAACTTCATAACAACTATCTTCAATATGAGAGCTCCTGGTATGACAATGCACAGATTACCATTATTTGTGTGAGCTCTTTTAATAACAGCATTCTTATTAATATTATCATTA	36	37	28	31	30	30	57	21	36	48	58	18	12	17	25	40	32	58	19	24	157	52	47	43	58	57	50	58	43	40	28	26	47	59	18	26	19	25	0	0
OTU_134	Ochrophyta	Phaeophyceae					76.88	Published	TTTAAGTGGTATTCAAAGTCATTCATCAGCTGCCATTGATTTAGCGATATTCAGTCTCCACTTAGCGGGTATCTCTTCAATTCTTGGAGCCATCAACTTTATAACAACTATTTTCAACATGCGTGCGCATGGAATGCGCATGCACCACTTACCTCTTTTTGTATGGTCTGTGTTGATTACTGCATTTCTTTTACTTTTATCGTTA	34	29	41	33	35	35	41	37	23	60	29	13	14	27	22	35	29	23	24	8	46	132	40	32	56	51	39	38	37	35	21	27	38	38	31	25	26	30	0	0
OTU_135	Arthropoda	Collembola	Entomobryomorpha	Isotomidae	Desoria	Desoria sp.	99.02	Private	GCTGTCTTCTGGAGTAGCTCATGCAGGAGCTTCAGTAGACCTTTCTATTTTTAGTCTTCACCTAGCGGGAGCTTCTTCCATTTTAGGAGCTGTAAATTTTATCACAACAATTATTAACATGCGGACTGCTGGAATAACTTGAGACCAAACTCCTCTTTTTGTATGATCTGTATTTTTAACAGCAATTTTACTTCTTTTATCCCTA	5	0	7	3	0	5	2	2	1	0	2	0	0	2	0	3	0	0	0	2	87	0	11	1	2966	2258	13	21	0	0	2	7	1	0	2	2	0	0	0	0
OTU_136	Ascomycota	Leotiomycetes	Helotiales	Sclerotiniaceae	Sclerotinia		95.1	Published	TTTATCAGGAGTACAAAGTCATAGTGGTCCAAGTGTTGACTTAGCCATATTTGCTTTACATTTATCAGGTATTAGTTCACTTCTTGGAGCTATAAACTTCATTACTACAATATTAAATATGAGAGCTCCAGGTATAAGCCTTCACAAACTAGCTTTATTTGGCTGAGCTGTAGTTGTTACTGCTGTATTATTATTACTATCATTA	3	10	10	16	0	6	4	0	1	0	0	0	0	0	0	0	0	0	0	0	0	0	0	1	0	3	0	1	0	0	9	2	4	6	1	11	8	21	0	0
OTU_137	Heterokontophyta	Oomycota	Pythiales	Pythiaceae			93.63	Published	TTTATCTAGTGTACAGGCACATTCAGGGCCTTCAGTTGATTTAGCTATTTTTAGTTTACATTTATCAGGTATTTCGTCATTATTGGGTGCTATTAATTTTTTATCTACTATTTATAATATGCGAGCTCCTGGTTTAAGTTTTCACAAATTACCTTTATTTGTATGGTCTGTTTTTATTACAGCTTTTTTACTATTATTAACTTTA	99	114	115	117	85	69	115	66	62	134	78	46	69	94	90	120	94	70	61	57	1063	1501	261	299	252	294	341	252	121	115	59	80	126	167	93	89	98	93	0	0
OTU_138	Rotifera	Monogononta	Ploima	Brachionidae	Brachionus	Brachionus budapestinensis	98.44	Published	TTTATCTGATTCTAAGTACCATAGAGGAATTTCTGTTGATTTAGCTATTTTCAGACTTCATTTAGCTGGTATCTCTTCTATTCTAGGTAGAATTAACTTTCTTACTACTATTTTATGCTCTCGTACTACTAAGACGTTTTCATTAGATCGTTTACCTCTTATGCTTTGAGCTCTTGCTGTTACGGCTGTCCTTTTAATCACTAGTTTA	47	29	0	0	92	135	174	17	15	267	32	11	20	19	94	123	77	95	19	18	0	0	0	0	0	0	0	0	13	27	0	0	78	74	23	20	31	41	0	0
OTU_139	Bacillariophyta	Mediophyceae	Thalassiosirales				85.78	Published	ATTGTCTGGCGCTACGGCTCACTCTGGTGGTTCTGTAGATTTAGCTATATTTAGTTTACATTTATCAGGTGCGTCATCTATTTTAGGTGCCATTAACTTTATTTGTACAATTTTTAATATGCGAGTAAAAAGTTTGTCCTTCCACAATCTCCCACTATTCGTATGATCTGTTTTAATTACAGCATTTTTATTACTGCTGTCTTTG	159	93	119	119	133	142	134	96	105	131	117	45	87	92	95	84	100	79	104	70	147	234	229	124	125	141	151	121	123	124	81	94	95	136	104	107	115	132	0	0
OTU_140	Ochrophyta	Phaeophyceae					79.8	Private	CCTAAGTAGTATTCAAGCACATTCAGGACCCGCAGTTGATCTAGCTATTTTTAGTCTTCACCTTTCTGGAGCTTCTTCTATTATAGGAGCTATTAACTTTATTGCCACTATTTTTAATAGGCGTGCACCAGGTAGGTTTATGCATAAAATGCCACTTTTTGTATGATCCGTTCTAATTACGGCATTTCTTCTACTACTTTCACTA	74	67	78	67	54	60	89	56	61	118	72	33	42	57	69	64	52	49	44	34	734	780	150	153	132	131	148	107	68	92	39	46	92	88	51	68	56	33	0	0
OTU_141	Basidiomycota						78.57	Private	TCTAAGTCTTCTAGGGTCTCACACTGGTGGGGCTGTAGATTGTGCTATTTTTTCTCTACACCTTGCCGGTATTAGCTCAATGCTGGGTGCTATGAATTTCATTACAACAGTGCTAAATATGCGAAACCCTGGTATGAGTATGCATAAGCTACCTCTGTTTGCTTGAGCGATTCTAGTGACAGCGGTGCTGCTTCTGCTAAGTCTG	0	0	0	0	0	0	0	0	0	0	0	0	0	0	0	0	0	0	0	0	0	0	0	0	0	0	0	0	0	0	0	0	0	0	0	0	0	0	0	0
OTU_142	Heterokontophyta	Oomycota					77.44	Published	TTTATCTGGTATAGTCGCTCACCCTGGTGCATCTGTTGATTTAGCTATATTTAGTTTACATTTATCTGGTGCATCCTCTATAGCAGGTGCAATTAATTTTATGTCTACAATTTTTAATATGCGAGTAAAAGGCTTAACTTTACACAGAATGCCTTTATTTATTTGATCACTTTTATTTACTGCTTTTCTTTTAGTTTTTACTTTA	130	73	65	92	90	69	170	90	153	167	162	44	91	119	88	103	126	126	162	94	826	861	138	154	307	180	136	115	66	73	73	42	88	160	115	109	89	106	0	0
OTU_143	Heterokontophyta	Oomycota	Saprolegniales	Saprolegniaceae			94.12	Published	TTTATCAAGTGTTCAAGCACATTCAGGTCCTTCAGTAGACTTAGCTATTTTTAGTTTACATTTAGCAGGTATTTCTTCTTTATTAGGTTCTATTAATTTTATAACTACTATTTATAATATGAGATCTCCAGGTTTAACTTTTCATAAATTACCTTTATTTGTTTGGTCTGTATTTATAACAGCTATATTATTATTATTAAGTTTA	137	104	120	129	101	88	174	132	70	140	111	47	109	121	127	143	91	116	110	82	996	986	244	213	259	287	232	236	127	175	111	118	199	119	65	81	105	128	0	0
OTU_144	Basidiomycota	Agaricomycetes					80.39	Published	ATTAAGTAGTATTCAAGCACATTCCGGAGGTTCTGTAGATTTAGCTATTTTTAGTTTACATTTAGCTGGAGTTTCTTCGTTATTAGGTGCTATTAATTTTATAACAACAACATTAAATATGCGAACAAGAGGCATGGCTATGCATGCAATTCCATTATTTGTTTGAGCTGCCTTTATTACTACAATCTTATTATTATTAGCGTTA	52	46	34	33	49	41	72	55	60	74	77	25	52	39	53	55	64	61	44	39	493	634	62	79	102	67	112	96	63	35	30	42	79	89	36	49	62	60	0	0
OTU_145	Porifera	Demospongiae					83.84	Published	AATAGCAAGTATAGAGTACCACTCAGGGGGGGCAGTAGATTTAGGGATATTTAGCCTACACTTAGCAGGGGTATCATCAATACTAGGGGCAATGAATTTCATAACAACAATAATAAATATGAGAGCACCAGGAATGACAATGCATAAATTACCATTATTTGTGTGAGCAGTGTTAATAACAGCAGTGTTATTATTACTATCATTA	0	0	0	0	0	0	0	0	0	0	0	0	0	0	0	0	1	0	2	1	0	0	6	0	0	0	0	0	0	2	0	0	0	0	0	2	0	0	0	0
OTU_146	Rotifera	Monogononta	Ploima	Brachionidae	Brachionus	Brachionus quadridentatus	99.02	Published	TTTATCTGATTCTGTTTATCATAGAGGTGTTTCTGTTGATTTGGCTATTTTTAGTCTGCATTTATCCGGTGTCTCTTCTATTTTAGGTAGAATTAATTTCTTAACTACTATTATCTGTTCTCGTACTACTAAAAGTATTTCTTTAGATCGCTTGCCTCTTATGCTTTGAGCTATCGCTGTTACTGCTATTCTTTTGATTACTAGCCTT	0	0	62	99	490	464	72	0	0	83	0	0	286	287	202	287	132	145	0	0	0	0	0	0	0	0	26	22	0	0	0	0	61	46	208	295	18	18	0	0
OTU_147	Heterokontophyta	Oomycota	Pythiales	Pythiaceae	Pythium		95.1	Published	TTTATCAAGTGTTCAAGCACACTCAGGACCTTCAGTAGATTTAGCTATTTTTAGTTTACATTTATCAGGTATTTCATCTTTATTAGGTGCTATTAACTTTCTTTCAACTATTTATAATATGAGAGCTCCTGGTTTAAGTTTTCATAGATTACCTTTATTCGTTTGGGCTATTTTTATTACAGCTTTCTTATTAGTTTTAACTTTA	132	123	128	112	107	106	58	136	22	65	125	14	15	11	28	42	44	31	41	32	783	830	439	389	355	332	460	373	80	83	134	143	149	103	111	127	177	152	0	0
OTU_148	Arthropoda	Insecta					74.87	Published	TTTATCAAGTATTGCTGCACATAGTGGTGGTTCCGTAGATTTAGCAATATTCAGTTTACATTTAGCTGGTATATCAAGTATTGCTGGTTCTATTAATTTTATGACTAGTATAATGAATATGAGAATTAAAGGTATTGATTTATTTAAATTACCTTTATTAGTTTGAGCTTTATTTATTACTGCTTTCTTACTAGTATTTACCTTA	103	58	67	93	63	71	60	152	52	37	202	30	65	87	132	145	132	127	88	98	1273	756	232	114	335	190	97	86	122	105	71	71	162	247	107	104	92	79	0	0
OTU_149	Ochrophyta	Raphidophyceae					80.18	Published	GTTAAGCAGTATTGAAGCACATTCAGGACCTTCAGTAGATTTAGCCATTTTTAGTTTACATTTATCTGGTGCATCTTCTATTGCAGGAGCTATCAATTTTATTGTAACTATTGTTAACATGAGAGCACGTGGTATGGAATTTTATCAATTACCTTTATTTGTTTGAGCTGTCTTTGTGACAGCAATTTTATTACTACTGTCATTA	93	84	168	146	73	128	70	31	63	103	76	13	40	21	30	43	39	32	34	8	1479	1094	192	228	193	172	231	162	84	121	68	65	94	66	76	53	83	67	0	0
OTU_150	Heterokontophyta	Oomycota	Pythiales	Pythiaceae	Pythium	Pythium sp. nov	100	Published	TTTATCAAGTGTTCAAGCACACTCAGGACCTTCAGTAGATTTAGCTATTTTTAGTTTACACTTATCTGGTATTTCATCATTATTAGGTGCTATTAATTTCTTATCAACAATTTATAATATGAGAGCTCCTGGTTTAAGTTTCCACAGATTACCTTTATTCGTATGGTCAGTATTTATTACAGCTTTCTTATTATTATTAACATTA	137	96	90	106	102	83	31	107	36	26	122	13	15	25	18	26	27	16	22	14	330	700	303	267	210	181	332	258	73	84	94	98	113	83	75	55	79	141	0	0
OTU_151	Ochrophyta	Phaeophyceae					76.96	Published	ATTAAGTAGCATTTTAGCTCATTCTGGTCCTGCTGTTGATTTAGCAATTTTTAGTTTACATCTGTCTGGTGCAGCTTCGATTTTAGGTGCCATTAACTTTATTACTACAGTGTTCAATATGCGAAGTCCCGGATTATATATGCATAGATTGCCTTTATATGTTTGGTCGATATTAATTACTTCGTTTTTGTTATTAATTTCATTA	84	64	62	76	74	83	109	59	78	81	71	45	52	41	61	81	53	57	32	25	435	437	85	81	158	150	126	106	62	81	39	61	80	86	60	53	52	37	0	0
OTU_152	Bacillariophyta	Mediophyceae	Chaetocerotales	Chaetocerotaceae			90.69	Published	TTTATCAAGTGCAACAGCTCATTCTGGTGGATCTGTAGATTTAGCTATCTTTAGTTTGCACGTGTCTGGAACTTCTTCTATTCTAGGGGCAATCAACTTTATCTGTACTATTTTTAATATGCGTGTAAAAAGTCTATCTTTCCATAATCTTCCTTTATTTGTATGGTCTGTACTAATTACAGCGTTTTTATTATTATTATCGTTA	146	149	98	123	70	78	76	61	79	81	76	40	36	28	38	46	73	89	64	70	298	267	152	161	221	177	107	112	112	112	53	79	146	98	74	100	132	136	0	0
OTU_153	Ochrophyta	Phaeophyceae					72.83	Published	TCTAAGTAGCATCCAAGCACACTCTGGACCATCTGTAGATCTAGCTATTTTTAGTCTACACATTTCTGGAGCATCATCAATCAGGGGAGCTATTAACTTTATCGTAACAATCCTAAACAGGCGTGCACCTGGTCTATTTAGGCACAAAATCCCACTATTTGTGTGAGCAGTTCTAATTACTGCTTTCCTACTTCTACTATCTCTT	75	49	53	50	84	77	53	48	29	81	32	32	26	42	45	56	52	37	40	23	387	354	94	89	135	109	113	122	85	73	48	32	91	77	40	47	40	41	0	0
OTU_154	Ochrophyta	Raphidophyceae					77.45	Published	ACTAAGTAGCATCCAAGCTCACTCAGGACCTTCTGTAGATCTAGCTATCTTCAGTCTACACATTTCTGGAGCTTCTTCTATTAGGGGAGCGATTAACTTTATCGTTACAATTTTCAACAGGCGCGCTCCTGGACTATTTAGGCACAAAATTCCACTATTTGTGTGAGCTGTGCTGATTACAGCATTCCTACTACTTCTATCTCTA	82	76	57	65	104	94	82	66	35	120	83	20	29	46	44	70	52	44	55	36	400	359	95	58	169	120	103	90	106	101	58	29	82	68	63	63	62	54	0	0
OTU_155	Heterokontophyta	Oomycota	Pythiales	Pythiaceae	Pythium		95.1	Published	ATTATCAAGTGTTCAAGCACACTCAGGACCATCAGTAGATTTAGCTATTTTTAGTTTACATTTATCTGGTATTTCTTCATTATTAGGTGCTATCAACTTTTTATCAACAATTTATAACATGAGAGCTCCAGGTTTAAGCTTTCATAGATTACCATTATTTGTTTGGTCAGTATTTATTACAGCTTTTTTATTATTATTAACATTA	113	77	102	75	96	103	55	71	34	80	70	32	30	29	25	25	25	25	32	20	476	486	412	444	320	298	410	360	128	95	121	108	166	157	114	108	172	116	0	0
OTU_156	Heterokontophyta	Oomycota	Saprolegniales	Leptolegniaceae	Aphanomyces	Aphanomyces laevis	100	Published	TTTATCAAGTGTTCAAGCTCATTCTGGACCTTCAGTTGATTTAGCTATTTTTAGTTTACATTTAGCTGGTATTTCTTCATTATTAGGTTCTATTAATTTTATAACTACTATATATAATATGAGATCACCAGGTTTATCTTTTCATAAATTACCTTTATTTGTTTGGTCTGTATTTATTACAGCTTTTTTATTATTATTAAGTTTA	286	228	116	120	85	92	28	32	40	11	48	35	23	24	16	16	2	7	20	9	463	770	121	138	83	49	248	247	61	36	73	47	83	95	181	253	581	697	0	0
OTU_157	Bacillariophyta	Mediophyceae	Thalassiosirales				88.73	Published	TTTATCAAGTGCAACAGCTCACTCTGGAGGTTCTGTAGATTTAGCTATTTTTAGCCTGCATTTATCAGGCGCATCTTCTATATTAGGAGCTATTAATTTCATTTGTACAATCTTCAATATGCGAGTAAAAAGTTTATCTTTTCATAATTTACCATTATTTGTGTGGTCTGTTTTAATTACAGCATTTTTATTATTGTTATCGTTA	304	265	250	263	197	163	267	340	187	361	299	281	197	258	225	341	283	386	325	307	126	202	304	305	378	448	467	359	230	283	183	224	315	241	171	216	122	299	0	0
OTU_158	Ochrophyta	Phaeophyceae					76.12	Published	TCTAAGTAGTATACAAGCACATTCTGGACCATCTGTAGATCTAGCTATATTTAGTCTTCATCTATCCGGAGCTTCATCTATTAGGGGAGCTATAAATTTTATAGTTACTATATTTAATAGACGTGCTCCAGGTCTATTTAGACATAAACTACCTCTATATGTATGATCAGTGCTAATTACAGCATTTCTACTACTACTTTCACTT	45	32	31	29	27	63	49	31	46	52	43	11	34	39	21	36	13	33	18	26	208	408	59	40	102	69	108	49	44	40	24	29	36	50	30	36	27	28	0	0
OTU_159	Rotifera	Monogononta					83.94	Published	TTTATCCGACTCTAAATTTCATAGTGGTGTATCAGTAGATATGGCTATTTTTAGTCTTCATCTTGCTGGTGTATCTTCTATCTTGGGTAGTATTAATTTCTTAACTACAATTATTTGTTGTCGTACAGCTTTAGGTTTCTCTTTAGATCGAATGCCCTTAATAATTTGATCTCTAGCCGTAACTGCCGTTTTACTTATTACTAGGTTA	0	0	0	0	0	0	0	0	0	0	0	0	0	0	0	0	0	0	0	0	0	0	0	0	0	0	1497	1175	0	0	1	0	0	0	0	0	0	0	0	0
OTU_160	Ochrophyta	Phaeophyceae					75.98	Published	CCTATCAGGTATTCAAGCCCACTCAGGACCTTCGGTTGATCTAGCGATCTTTTCGCTCCACCTTTCTGGTGCAGCCTCAATCCTAGGTGCAATTAACTTTATTGTTACTATCTTTAACAGGCGCGCACCTGGTAGGTTTAGGCACAAGCTACCTCTGTTTGTTTGGTCTATTCTAATTACAGCTGTTCTGCTTCTTCTATCGCTC	170	117	104	84	123	122	154	114	104	136	140	52	61	70	62	89	55	63	97	50	438	670	161	155	241	167	205	144	140	85	57	78	93	102	88	109	88	32	0	0
OTU_161	Rotifera	Monogononta					76.12	Published	TTTGTCCGACTCTAAATATCATAGAGGAGTTTCTGTTGATTTGGCTATTTTTAGTCTTCATTTAGCAGGTATCTCTTCTATTTTAGGTAGAATTAACTTTCTAACTACTATCTTAGTTTCTCGTATGGATTCCCTAATGAGACTATCTCGCTTGCCTCTTTTCCTATGATCTGTCGCAATTACTGCGGTCTTATTAATTGTTAGTCTT	0	0	0	0	41	34	0	0	3	0	0	0	0	0	0	0	0	0	0	0	768	2042	0	0	0	0	0	0	0	0	0	0	0	0	0	0	0	0	0	0
OTU_162	Rotifera	Monogononta					82.01	Private	TCTATCAGATTCTAAATATCATACTGGAATTTCAGTTGATTTAGCTATTTTTAGTCTTCACTTAGCAGGAATTTCTTCTATTTTAGGTAGAATTAACTTTCTTACAACTATTATTTGCTCTCGAACAGCTGGATTGGTCTCATTAGATCGACTTCCTCTTATGCTCTGAGCTCTTGCTATCACAGCAGTTCTCTTAGTTACTTCTCTT	0	0	0	0	0	0	0	0	0	0	0	0	0	0	0	0	0	0	0	0	0	0	0	0	0	0	875	882	0	0	0	0	0	0	0	0	0	0	0	0
OTU_163	Heterokontophyta	Oomycota	Pythiales	Pythiaceae	Pythium		95.59	Published	TTTATCAAGTGTTCAAGCACACTCAGGACCTTCAGTAGATTTAGCTATATTTAGTTTACACTTATCAGGTATTTCATCTTTATTAGGTGCTATTAATTTTCTTTCAACTATTTATAATATGAGAGCCCCTGGTTTAAGTTTCCATAGATTACCTTTATTTGTTTGGGCTATTTTTATTACAGCTTTTTTATTATTACTAACTTTA	113	97	146	154	140	145	101	90	51	120	147	28	84	108	112	165	81	57	46	52	874	583	257	224	204	204	330	292	67	74	68	123	155	114	100	138	184	149	0	0
OTU_164	Cnidaria	Hydrozoa					76.8	Private	TCTAAGTAGCATCACTTCACACTCTGGAGGAGCTGTAGATTTAGCCATCTTTAGTCTACACGTTTCTGGAGCTAGTAGTATCCTTGGAGCTATTAACTTTATTACTACCATTTTTAATATGAGAGCACCGGGTATGTCAATGCACCGTCTTCCATTATTCGTTTGGTCAGTATTAATTACAGCCTTCCTATTATTGTTAAGTCTT	63	56	55	62	84	73	78	46	50	97	76	22	34	26	56	65	41	35	54	31	590	574	80	88	89	78	66	88	71	50	55	27	60	70	59	50	42	37	0	0
OTU_165	Ochrophyta	Phaeophyceae	Ectocarpales				85.13	Published	ACTTTCATCAATTCAAGCACATTCAGGACCTTCAGTAGATTTAGCTATTTTTAGTTTCCATTTATCAGGAACAAGTTCAATTTTAGGATCAATTAATTTTATTGTTACAATTTTTAATATGCGTGCACCAGGAATGTTTATGCATAAATTACCACTTTTTGTATGATCAGTTTTAATTACAACATTCTTACTTTTATTATCTCTT	24	38	28	18	25	34	30	33	18	38	33	12	23	22	25	22	41	28	19	21	263	179	36	55	79	54	75	41	27	30	28	18	27	54	19	21	35	27	0	0
OTU_166	Rotifera	Monogononta	Ploima	Synchaetidae	Synchaeta	Synchaeta pectinata	99.47	Published	TCTGGCAGATGCTAAATTTCATTCTGGTATTTCTGTCGATTTAGCTATTTTTAGCTTACATTTAGCTGGTATTTCTTCTATTTTAGGTAGTATTAATTTTATAACTACTATTATTTGTTCTCGTACAACAAAGATAATTAGTATAGATCGTTTACCATTAATGTTATGATCATTAGGTGTTACTGCCTTTTTATTACTAACTACTTTG	15	34	90	93	224	211	74	128	63	103	127	73	253	264	189	212	101	95	158	125	0	0	3	4	28	19	18	11	82	100	126	147	93	121	97	87	118	173	0	0
OTU_167	Rotifera	Monogononta	Ploima	Lepadellidae			91.58	Private	TCTTTCTGATTCTAAGTATCATAGAGGTGTTTCTGTAGATCTTGCAATTTTCAGTCTTCATCTTGCTGGTATTTCTTCCATTCTCGGAAGTATTAATTTCTTGACTACTGTTATTTGTTCTCGTACAAGTAAAGTGGTTTCTATGGATCGTCTTCCGTTGTTTTTATGGGCTACTAGTCTCACGGCTATTCTTCTTATTACTAGATTG	4	0	0	0	1321	1299	14	226	0	1	246	1	0	0	0	0	409	290	248	235	0	0	0	0	2	4	9	5	0	0	3	1	148	225	0	0	0	0	0	0
OTU_168	Ascomycota	Leotiomycetes	Leotiomycetes_order_Incertae_sedis	Leotiomycetes_family_incertae_sedis			91.18	Published	ATTAAGTGGGGTACAAAGTCACAGTGGACCAAGTGTTGATTTAGCAATCTTCGCCTTACACTTATCTGGTATTAGTAGTTTATTAGGTGCAGTAAACTTTATAACAACTATACTTAACATGAGAAGTCCAGGTATAAGATTACATAAATTAGCTTTATTTGGATGAGCAGTTGTTGTTACAGCCGTATTATTATTATTATCATTA	180	131	162	185	154	168	233	150	71	188	133	69	90	87	129	125	75	113	71	84	417	368	155	134	171	165	275	207	148	130	76	81	127	166	141	113	143	209	0	0
OTU_169	Bacillariophyta	Mediophyceae	Stephanodiscales				88.06	Published	GCTATCGAGCGCAACCGCACATTCTGGAGGTTCTGTAGATTTAGCTATTTTTAGTTTACATTTATCTGGTGCGTCTTCTATTTTAGGTGCTATTAATTTCATTTGTACAATCTTCAATATGCGAGTAAAAAGTTTATCTTTTCATAATTTACCATTATTTGTGTGGTCTGTTTTAATTACTGCTTTTTTATTGTTGTTATCATTG	589	615	540	677	431	459	549	605	354	662	461	574	396	502	538	769	582	728	663	627	105	103	657	678	848	903	706	643	644	714	521	654	588	582	503	581	398	692	0	0
OTU_170	Bacillariophyta	Mediophyceae	Chaetocerotales	Chaetocerotaceae	Chaetoceros		96.08	Published	TTTATCAAGTGCAACAGCTCACTCTGGTGGATCTGTAGACTTAGCTATTTTTAGTTTACACGTTTCTGGAACTTCTTCTATTTTGGGGGCAATTAATTTTATTTGTACTATTTTTAATATGCGTGTAAAAAGTCTATCTTTTCATAATCTTCCTTTATTTGTATGGTCTGTGTTAATTACAGCGTTTTTATTACTATTATCTTTA	152	112	53	51	18	34	33	51	41	29	52	15	22	19	18	25	57	70	55	43	180	285	110	86	152	116	66	61	95	103	47	63	78	80	58	56	101	104	0	0
OTU_171	Bacillariophyta	Mediophyceae	Stephanodiscales	Stephanodiscaceae			93.03	Published	GTTATCGAGTGCGACAGCTCATTCAGGTGGCTCTGTGGATCTAGCTATATTTAGTTTGCATTTATCAGGTGCATCGTCTATCTTAGGTGCCATTAATTTTATTTGTACAATTTTCAATATGCGAGTAAAAAGTCTATCTTTCCACAACCTTCCATTATTTGTATGGTCTGTTTTAATTACGGCATTTTTACTACTGCTGTCTTTA	117	104	128	164	121	100	152	77	59	153	118	66	65	89	105	96	94	104	115	94	242	91	126	138	199	116	140	125	182	195	94	111	122	116	86	111	92	115	0	0
OTU_172	Porifera	Demospongiae					84.95	Published	GTTATCAAGTATAGAATTTCATTCAGGGGGAGCAGTAGATTTAGCGATCTTTAGCTTACACTTGGCAGGGATATCATCAATTTTAGGAGCGATGAATTTTATTACGACGGTAATCAATATGAGAACACCAGGAATGACAATGCATAAAATGCCATTGTTCGTGTGAGCGGTATTAATAACAGCGGTATTATTATTATTATCGTTA	14	28	30	25	20	13	24	17	15	29	24	11	19	18	13	25	12	14	24	7	224	200	52	33	64	49	45	25	25	19	20	10	20	32	21	18	14	14	0	0
OTU_173	Arthropoda	Insecta					78.43	Private	ATTATCATCAATTCAAGCACATTCAGGTGGGGCAGTTGATTTAGCAATTTTCAGCCTACATTTATCAGGTATTTCATCATTACTAGGATCAATTAACTTTATTACAACAGTGATAAATATGAGAGCTCCTGGAATGGGATTTGCTCAATTACCATTATTTGTTTGGTCTGTATTCTTTACTGCTTTCTTATTGTTATTATCATTA	30	17	31	19	29	23	46	40	16	33	22	7	28	29	22	25	31	15	11	14	51	67	39	41	36	36	34	37	35	23	5	19	38	18	18	13	23	24	0	0
OTU_174	Arthropoda	Insecta	Diptera	Chironomidae	Cladotanytarsus		99.51	Private	TTTATCTTCTAATATTGCTCATAGAGGGGCTTCTGTTGATTTAGCTATTTTTTCTCTACATTTAGCAGGAATTTCTTCAATTTTAGGATCAGTAAATTTTATTACTACTGCTATTAATATGCGAAGAAATGGAATTACTTTAGATCGAATACCTTTATTTGTTTGATCTGTTATTATTACTACTATTCTTTTACTTTTATCCCTC	2	1	5	1	0	2	3	0	2	2	1	1	3	0	0	1	948	871	0	1	27	2	1	0	4	10	10	6	8	0	2	0	4	1	3	5	24	6	0	0
OTU_175	No Match	No Match	No Match	No Match	No Match	No Match			AGTGATAAACTCGTGCCAGCCACCGCGGTTATACGAGAGGCCCAAGTTGACAAAAATCGGCGAAAAGCGTGGTTAGTGATATCACCTCCACTAAAGCCAAACACCTTCAAGGCTGTAATACGCCCCCGAAGACAGGAAGCCCAATCACGAAAGTAGCTTTAATTTTCATGAAGCCACGAAAGCTAGGAAACAAACTGGGATTAGATAC	94	84	66	87	84	120	98	64	79	70	86	95	56	67	62	105	81	85	100	75	61	99	57	80	60	52	93	81	59	88	94	75	105	83	66	88	83	100	0	33
OTU_176	Ochrophyta	Phaeophyceae					76.62	Published	ACTAAGTAGTATCCAAGCTCATTCAGGACCATCGGTAGATCTAGCAATCTTTAGTCTACACCTATCTGGAGCTTCGTCAATTATGGGTGCGATTAATTTTATTGTAACTATTTTTAATAGGCGTGCTCCAGGACTATTTAGGCATAAACTACCACTTTTTGTATGAGCGGTACTTATTACAGCTTTCCTACTACTACTATCACTT	69	34	33	24	26	29	39	34	32	27	47	21	20	18	13	30	27	30	23	19	439	136	70	44	80	54	68	33	32	31	20	28	40	58	22	19	15	41	0	0
OTU_177	Rotifera	Monogononta					76.62	Published	TTTATCGGACTCTAAATTCCACAGAGGGATTTCTGTGGATCTTGCTATTTTTAGGTTGCACTTAGCCGGTATTTCTTCTATTTTAGGTAGAATTAACTTTCTGACTACTATTTTAGTTTCTCGTATGGCCTCTTCTCTGAGCCTCGCCCGCTTACCTCTGTTCCTTTGGTCTGTTGCTATCACAGCTGTTCTTCTTATTGTTAGCTTA	1	0	87	82	410	383	31	103	21	19	103	7	47	36	25	53	85	72	1	6	0	0	216	169	134	131	236	205	108	116	66	99	59	35	149	159	284	268	0	0
OTU_178	Heterokontophyta	Oomycota	Saprolegniales	Saprolegniaceae			92.65	Published	TTTATCTAGTGTTCAAGCGCATTCTGGTCCTTCAGTAGATTTAGCTATTTTTAGTTTACATTTAGCAGGTATTTCTTCTTTATTAGGATCTATTAATTTTATAACTACTATTTATAATATGAGATCTCCTGGTTTAACTTTTCATAAATTACCTCTATTTGTTTGGTCTGTATTTATAACAGCTATATTATTATTATTAAGTTTA	82	75	76	72	69	78	90	65	59	90	66	36	73	92	73	74	80	97	77	59	274	328	128	102	155	142	123	104	76	47	71	91	126	78	54	64	53	85	0	0
OTU_179	Ochrophyta	Raphidophyceae					76.92	Published	ACTAAGTAGTATTCAAGCCCATTCTGGACCAGCCGTAGATCTAGCTATCTTTAGTCTTCATCTATCAGGAGCATCTTCTATTATAGGTGCGATTAACTTCATTGTTACCATCTTTAACAGGCGTGCCCCAGGTAGGTTTAGGCATAAAATGCCTCTATATGTATGAGCTGTTCTTATCACCGCCTTCCTTCTGCTGCTATCTCTA	40	48	37	34	61	38	61	76	55	75	68	30	35	29	53	39	58	38	26	56	59	224	52	62	196	110	44	59	12	22	25	32	21	59	56	46	69	60	0	0
OTU_180	Cryptophyta	Cryptophyceae	Cryptomonadales				89.22	Published	ACTTAGCAGTATTTCTGGTCACCCCGGTGGTGCTGTTGATCTAGGTATCTTTAGTCTGCATGTAGCAGGGGCTTCTAGTATTCTAGGTGCGATTAACTTTATAACAACTATTTTTAACATGAGAGTTCCTGGAATGACAATGCATAGAATACCTCTTTTTGTGTGGGCTGTTTTAATAACTGCCTTTTTACTTCTTCTCTCGTTA	67	59	47	65	47	46	56	37	47	51	69	40	33	36	21	32	68	36	31	28	528	476	128	128	146	157	82	71	104	105	34	27	118	105	79	92	78	74	0	0
OTU_181	Heterokontophyta	Oomycota					80.88	Published	TTTAGCGGGTATTAGTGGTCACTCTGGCCCATCTGTTGATTTAGCTATTTTTAGTTTACATCTAGCTGGAGCTTCTTCTATTTTAGGTGCTATAAATTTTATTACAACAATTTTTAATATGCGAGCTCCAGGTTTACATTACTACAGATTACCTTTATTCGTTTGGTCTGTATTAATTACAGCTTTTCTTCTTCTTTTATCGTTA	51	21	29	34	14	13	23	22	20	46	36	22	19	17	35	29	24	33	17	14	114	186	49	37	63	47	37	36	36	26	21	38	28	29	23	20	20	17	0	0
OTU_182	Ochrophyta	Raphidophyceae					84.62	Published	TTTAAGTAGTGTACAAGCACATTCTGGACCATCGGTTGATTTAGCAATTTTTAGTTTACATTTATCAGGTGCCGCTTCAATTTTAGGAGCAGTAAATTTTATTACAACAATTTTTAATATGCGAGCTCCTGGAATGACTATGCATCGATTACCTTTATACGTTTGGTCTATACTAATAACTTCATTTTTGTTACTATTATCTTTA	45	28	17	35	34	33	48	31	35	64	45	19	30	20	24	33	26	33	28	21	254	282	59	37	76	51	59	73	51	50	20	18	52	36	23	36	23	36	0	0
OTU_183	Arthropoda	Insecta					78.65	Private	GCTAAGTGGAATTGAGGCGCATTCCGGCCCTGCGGTTGATTTTGGAATTTTCAGCCTACACTTAGCGGGAATGTCTTCTATTTTAGGAGCAATTAACTTTATTGTCACTATTTTCAACATGCGCGCTCATGGAATGCCTCTGTACGCAATGCCTTTATTTGTTTGAAGTATTTTAATTACCGCTTTCTTATTACTTCTTTCTCTA	73	42	69	98	69	74	42	46	32	58	38	24	17	18	14	20	21	10	9	11	632	864	221	212	311	183	240	160	83	80	57	46	74	63	110	111	100	95	0	0
OTU_184	Arthropoda	Insecta					77.69	Private	ATTGTCTGGAATTCAAGCACATTCTGGTGGTTCCGTTGATTGTGCTATTTATTCCCTTCATCTAGCTGGTGTTTCTTCAATTTTAGGAGCAATCAATTTCATCGTTACAATTACTAATATGCGTGCTCCAGGAATGACTGCTAATCGAACTCCCTTGTTCGTTTGAGCTGTTTATATTACAGCTTTTTTACTTTTGCTTTCTTTA	93	54	61	67	93	67	69	47	43	68	73	26	44	58	53	54	44	35	27	41	299	245	97	77	147	85	99	89	59	62	26	42	95	82	60	70	62	48	0	0
OTU_185	Ascomycota	Leotiomycetes	Leotiomycetes_order_Incertae_sedis	Leotiomycetes_family_incertae_sedis			91.67	Published	TTTAAGTGGAGTACAAAGTCACAGTGGACCAAGTGTGGATTTAGCGATTTTCGCTTTACATTTATCTGGTATAAGTAGTTTATTAGGTGCAGTTAATTTCATAACAACTATACTTAATATGAGAAGTCCAGGTATAAGATTACACAAATTAGCTTTATTTGGATGAGCAGTAGTTGTTACTGCTGTATTATTACTATTATCATTA	114	102	136	151	80	82	118	67	69	130	116	41	64	101	77	140	83	64	68	68	412	504	192	194	262	164	111	94	122	82	71	70	98	131	96	134	110	130	0	0
OTU_186	Ochrophyta	Phaeophyceae					79.38	Published	ACTATCAGGTATCCAAGCACATTCAGGACCTTCAGTAGATCTAGCTATTTTTAGTCTACACCTATCAGGTGCTTCATCAATTAGGGGAGCTATTAACTTTATTGTTACAATTTTCAATAGGCGTGCTCCAGGTATGTTTATGCATAAACTACCACTATTTGTATGATCTGTACTAATTACAGCTTTCCTACTACTATCACTA	485	455	449	420	492	416	554	374	332	591	544	181	247	289	346	381	241	342	238	213	2831	3209	685	540	803	787	878	734	404	372	239	314	580	470	304	366	342	335	0	0
OTU_187	Ochrophyta	Raphidophyceae					79.82	Published	TCTAAGTAGCATTCAAGCCCATTCTGGACCTGCTGTAGATCTAGCTATTTTTAGTCTACATCTATCTGGAGCTTCTTCTATTATGGGAGCTATTAATTTTATTGTTACTATCTTTAACATGCGTGCTCCTGGACTATTTATGCATAAACTACCACTTTATGTATGAGCTGTACTTATTACAGCGTTTCTACTACTGCTTTCACTT	73	54	46	55	54	83	83	79	56	135	99	18	49	63	64	57	66	44	73	30	387	623	107	77	137	104	145	90	51	42	44	40	67	66	36	41	35	38	0	0
OTU_188	Heterokontophyta	Oomycota					79.8	Published	ATTAAGTAGTATTCAAGGGCATGCAGGTGCATCAGTAGACTTAGCGATTTTTAGCTTACATATCGCAGGTGTTTCATCTTTAGCAGGTTCTATTAATTTTATTGCTACTGTTTTTAACATGCGCGCTCGTGGTTTATCAATGCATCGTTTACCATTATTTGTATGATCTGTATTAATTACTGCTTTCTTATTATTATTATCGCTT	48	45	56	37	76	45	61	36	35	58	42	20	21	20	35	39	56	26	28	18	251	212	91	44	112	98	84	59	39	40	35	25	56	50	39	34	43	57	0	0
OTU_189	Arthropoda	Insecta					77.67	Private	TTTATCCGGTATCATTGCTCATCCAGGCTCTTCTGTTGATTTAGTTATTTTTAGTTTACATCTTGCTGGTATTTCTTCTATATTAGGTGCTATAAACTTTATAACAACAATTCTTTTTTATCGTGTTGAAGGTTACAGGTTATATCGTGTACCTTTGTTTGTTTGGTCTATTTTAATTACAGCAGTGTTGTTGTTACTTTCGGTA	49	45	46	38	46	32	73	65	35	53	55	28	24	33	36	42	38	35	27	25	328	819	94	64	138	100	83	79	35	26	22	32	59	35	46	40	37	27	0	0
OTU_190	Bacillariophyta	Mediophyceae	Stephanodiscales				87.69	Published	TTTGTCAAGTGCGACAGCTCATTCTGGTGGTTCTGTAGATTTAGCTATTTTTAGTTTACATTTATCTGGTGCTTCTTCCATTTTAGGAGCTATTAATTTCATTTGTACAATTTTTAATATGCGAGTGAAAAGTTTGTCTTTTCATAACTTACCGTTATTTGTGTGGTCTGTTTTAATTACTGCGTTTTTGTTGTTGTTATCGCTG	63	65	52	60	46	67	73	57	37	81	53	47	53	49	45	58	50	44	41	39	125	194	76	77	138	122	57	96	59	108	34	46	41	49	48	45	51	58	0	0
OTU_191	Rotifera	Monogononta	Ploima	Synchaetidae	Polyarthra		96.35	Published	TCTGGCAGATGCTAAATATCATTCAGGTATTTCTGTTGATTTTGGCGATTTTAGTCTTCATTTAGCTGGAGTTTCTTCTATTTTAGGAAGAATTAATTTTTTAACTACTATTATTTGTTCTCGTACTACAAAATTGATTTCTATGGATCGTTTACCTTTGTTATTATGAGCAATTTCAGTTACAGCTGTATTGTTAATTACAAGATTA	11843	10811	14575	15356	50311	53047	18493	21120	12311	20505	22893	8740	36588	42133	41844	55410	10565	9574	31698	30239	2991	3426	2122	1481	2980	2520	38591	32234	50176	55353	21461	24254	7497	7710	22546	25163	63547	77569	0	1
OTU_192	Bacillariophyta	Mediophyceae					75.53	Published	ACTTTCAAGTATACAAGCACATTCTGGTCCATCCGTAGATCTAGCAATATTTAGTCTACATCTATCAGGTGCTTCTTCTATTAGGGGTGCTATAAATTTTATAGTTACAATATTTAATAGGCGTGCACCAGGTCTATTTAGGCATAAGCTACCTCTATTTGCATGAGCGGTACTTATAACAGCATTTCTACTACTACTATCTCTA	54	43	22	45	33	33	60	37	40	42	34	8	35	50	27	32	37	25	9	27	337	368	47	72	99	74	44	59	36	33	19	7	37	38	35	33	11	35	0	0
OTU_193	Rotifera	Monogononta	Ploima	Synchaetidae	Synchaeta		95.9	Private	TTTATCTGATTCTAAATTTCATTCTGGAATTTCTGTTGATCTTGCTATTTTTAGTCTTCATTTAGCTGGTATTTCTTCTATTATAGGAAGAATTAATTTTATGACTACTATTATTTGTTCTCGTACTACTAAGATAATTAGAATAGACCGTTTACCTTTAATAATTTGATCTTTAGGGGTTACAGCATTTCTTTTAGTTACTACTCTT	0	0	0	0	0	0	0	0	0	0	0	0	0	0	0	0	0	0	405	304	0	0	0	0	0	0	358	318	4	0	0	0	0	0	0	0	83	102	0	0
OTU_194	Ochrophyta	Phaeophyceae					79.9	Published	GTTATCAGGTATTTTAGCGCATTCAGGGCCATCTGTAGATTTAGCTATATTTAGTTTACATTTATCAGGGGCAAGTTCTATTATGGGTTCTATTAATTTTATTGTAACTATTTTTAATATGAGAGCGCCAGGTCTTTTTATGCATAAATTACCTCTTTTTGTATGAGCTGTTTTAGTAACTACATTTTTATTATTATTATCTTTA	33	24	22	28	61	40	43	44	28	75	20	21	49	28	54	73	50	63	42	38	516	799	84	57	104	62	130	116	73	83	19	26	33	47	31	34	23	35	0	0
OTU_195	Rhodophyta	Florideophyceae					80.51	Private	TTTAAGTAGTATTCAAAGCCATTCTTCAGCTGCTGTAGATCTTGCTATTTTTAGTCTACATTTAGCTGGTATTTCTTCTCTTTTAGGTGCTATTAATTTTATTACAACTGTTTTAAATATGCGTGCACCAGGTTTAGGTATGCATCAAATACCTTTATTTGTTTGAGCAGTATTTATTACAGCTTTTCTTTTACTTTTTTCATTA	5	9	1	1	0	4	2	1	0	10	9	3	7	3	7	0	1	2	3	0	3	4	6	3	10	3	4	6	0	7	2	0	1	1	0	3	4	1	0	0
OTU_196	Heterokontophyta	Oomycota					79.9	Private	TCTTTCAAGTATAGAATACCATTCTGGTGGTTCTGTAGATTTAGCTATTTTTAGTTTACACTTAGCAGGTATTAGCTCTATTTTAGGTGCTTCTAACTTTATTACTACAATTTTAAATATGAGAGCCCCTGGTATGACTATGCATAGATTACCTTTATTCGTATGAGCGGTGTTTATTACAGCTATTTTATTATTACTTTCATTA	45	18	33	26	25	26	34	22	15	48	25	15	11	22	28	29	23	22	33	22	193	194	44	26	57	54	50	46	15	21	17	16	28	31	18	22	13	28	0	0
OTU_197	Ochrophyta	Raphidophyceae					76.62	Published	TTTGAGTGGTATTGAAGCACACTCTGGTGCCGCTGTAGATTTAGGTATTTTCAGTTTACATATGTCTGGTTTATCTTCTATTTTAGGGTCTATTAACTTTATTGTTACTATCACAAATATGCGCGCATTAGGTTTAACTTTTTACACTTTACCTCTATTTGTTTGATCCGTTTTTATTACGGCATTCTTATTACTTCTTTCTTTA	62	50	88	86	45	37	48	24	14	40	43	4	34	22	23	31	16	12	12	8	980	439	124	88	114	35	163	145	33	37	28	31	49	66	89	81	108	61	0	0
OTU_198	Mollusca	Gastropoda	Stylommatophora	Hygromiidae	Monacha	Monacha cartusiana	100	Private	ACTAAGGTCTCTTGTAGGTCATAGAGGTGCTTCAGTAGACCTAGCTATTTTTTCATTACATTTGGCGGGTATATCTTCCATTTTAGGGGCTATTAACTTTATTACTACAATTTTTAATATACGTTCTCCAGGGTTAAGTTTAGAACGAATAAGCCTATTTGTTTGGTCTATTTTAATTACAGTGTTTTTACTGTTACTTTCATTG	104	77	71	59	92	78	108	43	48	108	58	22	119	105	74	55	48	24	27	57	300	246	94	110	62	88	93	76	54	53	35	41	280	198	96	103	105	99	0	0
OTU_199	Heterokontophyta	Oomycota					80.39	Published	TTTATCTAGCATTACAGCACACTCCGGTGCAGCTGTAGATTTAGCTATTTTCAGTTTACACTTATCGGGAGTTTCGTCATTACTAGGTGCAATTAATTTTATATGTACTATCGTTAATATGAGAACGAAAAGTATGCCTTTTCATAGATTACCTTTATTTGTGTGGTCTATTTTAATTACGGCATTTTTATTGTTATTATCATTA	88	60	91	76	129	91	91	97	83	113	134	64	78	93	51	68	122	86	112	130	234	154	107	76	154	122	65	80	79	77	93	133	121	118	111	134	138	176	0	0
OTU_200	Rotifera	Monogononta					77.95	Published	CCTTTCCGATGCTAAGTATCACAGAGGGGTTTCTGTAGATTTAGCTATTTTTAGTCTTCATCTAGCTGGTATTTCTTCTATCCTTGGCAGAATTAATTTTCTTACTACCGTGGTATGTTCTCGTACCAGAAAAATCATCTCTATGGATCGTCTTCCTTTATTTTTATGAGCCACTAGGCTTACAGCAATTTTACTTATTACAAGTCTT	0	1	148	200	62	17	0	0	4	0	0	2	21	33	0	0	0	5	0	0	0	0	0	0	0	1	511	479	79	64	170	144	135	73	0	1	48	42	0	0
OTU_201	Basidiomycota						79.1	Private	TCTATCAGGTGTACAAAGCCACTCAGGTGGATCAGTTGACCTTGCGATCTTCAGTCTTCACCTTGCAGGTATCAGTTCTCTACTTGGAGCGATGAACTTCATTACTACAGTACTTAACATGCGAAACCCAGGTATGACTCTACACAAGCTTCCACTATTCTGCTGAGCAATTATGGTAACAGCTGTGCTTCTACTACTTTCACTT	33	75	140	53	90	52	48	82	71	94	132	20	67	72	49	102	39	9	52	37	375	952	162	108	144	98	132	93	24	23	30	36	72	93	56	47	51	38	0	0
OTU_202	Cnidaria	Anthozoa					77.16	Private	TTTAAGTGGTATTGAAGCACACTCTGGTGCAGCTGTTGACTTAGGTATTTTTAGTTTACATATGTCTGGTTTATCTTCTATTTTGGGTTCTATTAACTTTATTGTTACTATTACAAATATGCGTGCATTAGGTTTAACCTTTTACACTTTACCTTTATTTGTTTGATCTGTTTTTATTACAGCGTTTTTATTACTTTTATCTTTA	40	61	44	74	65	48	55	6	25	35	31	20	10	14	26	35	2	29	27	6	149	1270	52	80	46	43	97	178	27	38	19	30	81	85	60	66	61	30	0	0
OTU_203	Heterokontophyta	Oomycota	Pythiales	Pythiaceae			91.67	Published	GTTATCTAGTGTACAAGCTCATTCAGGTCCTTCAGTAGATTTAGCAATATTTAGTTTACATTTATCAGGTATTTCATCATTATTAGGTGCTATTAACTTTTTAGCAACAATATATAATATGAGAGCACCTGGTTTAAGTTTTCATAGATTATCTTTATTTGTATGGTCTATATTAATTACTGCTTTTTTATTAGTTTTAACTTTA	79	53	60	52	69	78	128	69	63	102	90	25	51	36	71	79	64	60	43	22	579	496	148	97	199	128	168	157	66	98	47	35	83	81	43	50	53	70	0	0
OTU_204	Basidiomycota	Agaricomycetes					79.1	Published	TATTTCATCTATTGAATACCATTCTGGGGGTTCTGTTGATTTAGCTATCTTCAGTTTACACTTAGCTGGTATCTCTTCTATCTTAGGTGCTATGAACTTCATTACTACTATTTTAAACATGAGAACACCTGGTATGACAATGCATAGATTACCTTTATTTGTATGAGCTGTATTCATTACCGCTATACTTTTAATCTTATCTTTA	0	0	0	0	0	0	0	0	0	0	0	0	0	0	0	0	0	0	0	0	0	0	0	0	0	0	0	0	0	0	0	0	0	1	0	0	0	0	0	0
OTU_205	Arthropoda	Insecta	Diptera	Chironomidae	Paratanytarsus	Paratanytarsus dissimilis	100	Private	ATTATCTTCAAGAATTGCTCATAGAGGGGCCTCAGTTGATTTAGCAATTTTCTCTCTTCACTTAGCAGGAATTTCTTCTATTTTAGGTTCAGTAAATTTTATTACAACAGCTATTAATATACGATCAAATGGAATTACTTTAGATCGGATACCTTTATTTGTTTGATCTGTAATTATTACTACTATTTTACTTCTTTTATCTCTT	25	17	89	92	13	12	34	1	7	61	10	1	9	6	15	18	10	3	0	0	264	216	214	167	35	21	77	69	40	37	15	19	39	28	24	22	10	6	0	0
OTU_206	Arthropoda	Insecta					75.64	Published	ATTGTCATCAGTAGAAGCGCATAGTGGACCATCAGTGGATTTGGCGATTTTCTCATTGCACTTGGCAGGGGTATCGTCGATTTTGGGAGCAATTAACTTCATTACAACGATTTTGAACATGCGAGCACCAGGAAGAACCATGCACCGATTGCCATTGTTCTGCTGGTCAGTAAGAATTACAGCGGTATTGTTGTTGTTGTCATTG	19	5	16	28	17	20	20	14	24	49	37	10	37	37	23	36	50	27	39	23	109	205	30	29	53	37	45	23	39	21	22	20	59	35	21	15	18	29	0	0
OTU_207	Placozoa						81.37	Published	TTTATCATCAATTGAAGCACATTCTGGAGGTTCAGTAGATTTAGCAATTTTTAGTTTACATTTAGCTGGTGCATCTTCAATTTTAGGAGCTATGAATTTTATTACAACAGTAATAAATATGAGAACTCCAGGATTAAAAATGCATAGAATTCCTTTATTTGTTTGAGCAGTATTTATAACAGCAATATTGTTATTATTATCTTTA	72	31	80	63	46	69	88	65	71	76	57	25	72	64	79	79	77	70	75	54	525	360	85	99	139	88	111	60	51	50	56	50	76	74	41	51	65	74	0	0
OTU_208	Cnidaria	Scyphozoa					79.8	Published	CATCGCGTCAATAGAGTACCACTCAGGGGGATCAGTAGATTTAGCTATCTTCAGTTTACACCTTGCTGGGGTTTCTTCTATCTTAGGAGCTATGAACTTTATTACTACTATTTTAAACATGAGAACTCCAGGGATGACAATGCATAGATTACCATTATTCGTATGAGCGGTATTCATTACAGCTATACTTTTAATCTTATCTTTA	24	33	24	35	36	48	51	42	30	58	44	5	29	37	44	41	29	24	34	29	55	219	50	26	66	75	71	79	66	45	28	30	29	20	43	25	47	29	0	0
OTU_209	Rotifera	Monogononta	Ploima	Synchaetidae	Polyarthra		97.44	Published	TCTGGTATGCTAAATATCATTCAGGTATTTCTGTTGATTTGGCGATTTTTAGTCTTCATTTAGCTGGAGTTTTCTTCTATTTTAGGAAGAATTAATTTTTTAACTACTATTATTTGTTCTCGTACTACAAAATTGATTTCTATGGATCGTTTACCTTTGTTATTATGAGCAATTTCAGTTACAGCTGTATTGTTAATTACAAGATTA	526	513	681	733	2476	2525	860	994	583	1048	945	408	1786	2077	2143	2576	581	462	1508	1375	185	235	110	72	151	130	1836	1560	1900	2199	1002	1211	419	396	1043	1207	2827	3478	0	0
OTU_210	Heterokontophyta	Oomycota					81.37	Published	TCTATCAAGTATAGAATATCATTCAGGTGGTTCAGTTGATTTAGCCATCTTCAGTTTACATTTAGCAGGTATTAGTTCTATTTTAGGTGCTTCTAACTTTATTACAACAATTTTAAATATGAGAGCTCCTGGTATGACTATGCATAGATTACCTTTATTTGTATGAGCCGTATTTATTACAGCTATCTTATTATTATTATCTTTA	88	54	74	54	46	59	96	81	64	84	53	22	25	41	48	52	57	67	47	25	261	607	86	89	120	65	118	105	60	54	27	25	71	60	39	52	39	34	0	0
OTU_211	Ochrophyta	Phaeophyceae					77.45	Private	ATTATCAGGAATCCAAGCTCACTCAGGACCTTCTGTAGATTTAGCTATTTTTAGCTTACATTTATCTGGAGCAAGTTCTATTATGGGTTCTATTAATTTCATTGTTACAATTTTTAATATGAGAGCACCAGGTATGTTTATGTATAAGATGCCACTTTTCGGATGAGCACTTCTTATTACAGCTTTCTTATTATTACTTTCTCTT	10	5	7	9	16	16	18	10	8	17	13	5	5	7	12	5	15	13	12	8	168	169	14	16	33	12	19	13	16	14	9	7	14	12	5	8	5	15	0	0
OTU_212	Annelida	Clitellata	Crassiclitellata	Lumbricidae	Allolobophora	Allolobophora chlorotica L2	100	Private	CCTAGCAAGAAACATTGCTCATGCCGGCCCATCTGTAGACTTAGCTATTTTTTCTCTTCATTTAGCAGGTGCTTCATCAATCTTGGGTGCCATTAATTTTATTACTACTGTTATTAATATACGATGAAGAGGCTTACGACTTGAACGAATCCCATTATTCGTTTGAGCCGTACTAATTACAGTGGTCCTTCTACTCTTATCCTTA	21	69	59	92	53	37	59	57	20	75	46	34	64	60	73	117	73	72	33	41	82	0	47	17	54	16	65	58	38	60	12	29	58	100	35	36	41	52	0	0
OTU_213	Porifera	Demospongiae					84.13	Published	TCTAAGCTCTATAGTAGCTCATTCAGGAGGTTCCGTTGATTTAGCTATATTTAGTTTACATTTGGCCGGTATTTCGTCTTTATTGGGTGCTATAAACTTTATTACTACTATATTTAATATGAGGGTTCCAGGTTTATCAATGCATAAACTACCTTTATTTGTTTGATCAGTATTAATTACAGCTTTTTTATTATTGTTTTCTTTA	163	80	174	93	118	77	230	80	64	127	54	29	15	17	86	81	32	35	27	17	361	586	54	51	102	110	180	149	51	63	54	34	103	113	77	92	139	194	0	0
OTU_214	No Match	No Match	No Match	No Match	No Match	No Match			CTTGTCTGACTCTAAGTACCATAGTGGCATCTCTGTTGACCTTGCCATCTTTAGGCTTCACCTTTCTGGTGTTTCTTCTATTCTAGGAAGAATCAACTTTCTTACCACAATCTTAGTTTCTCGTATGACATCTACTTTAAGACTTGACCGTTTACCTCTTTTTCTTTGATCCATTGCAATCACAGCCGTTCTTTTAATTGTTAGCCTT	34	52	15	15	32	32	29	42	0	24	29	0	0	3	0	0	0	2	0	0	0	0	9	2	4	1	275	314	40	38	48	55	10	23	29	19	69	57	0	0
OTU_215	Rotifera	Monogononta	Ploima	Synchaetidae	Synchaeta		96.86	Published	ATTATCTGATTCTAAATTTCATTCTGGTATTTCTGTTGATTTAGCTATTTCAGTTTACATTTAACTGGTATTTCTTCTATTTTAGGTAGTATTAATTTTATAACTACTATTATTTGTTCTCGTACAACAAAGATAATTAGTATAGATCGTTTACCACTAATGTTATGATCATTAGGTGTTACTGCCTTTTTATTACTAACTTTTG	3	3	4	10	17	12	6	4	3	6	5	1	2	12	1	0	11	14	6	11	32	46	0	0	0	0	1	0	3	3	8	7	13	13	4	14	7	6	0	0
OTU_216	Ascomycota	Leotiomycetes	Leotiomycetes_order_Incertae_sedis				85.78	Published	ATTATCGGGGATACAAAGTCACAGTGGTCCTAGTGTAGATTTAGCTATCTTCGCTCTACATCTATCAGGGATAAGTAGTCTTTTAGGGGCTATGAATTTTATAACTACTATACTTAATATGAGAAGTCCAGGAATAAGACTACACAAATTGGCTTTATTTGGCTGAGCAGTAGTGGTTACAGCCGTGTTATTACTTTTATCTTTA	59	50	100	79	45	41	77	24	37	64	17	9	2	12	12	22	17	6	13	11	587	358	199	115	72	71	222	135	73	94	68	36	87	72	86	111	85	108	0	0
OTU_217	Heterokontophyta	Oomycota	Pythiales	Pythiaceae	Pythium	Pythium periplocum	100	Published	TTTATCAAGTGTTCAAGCACACTCAGGTCCTTCTGTAGATTTAGCTATATTTAGTTTACACTTATCAGGTATTTCATCTTTATTAGGGGCTATTAATTTTCTTTCAACTATTTATAATATGAGAGCTCCAGGTTTAAGTTTCCATAGATTACCTTTATTCGTTTGGGCTATTTTTATTACAGCTTTCTTATTATTATTAACTTTA	83	84	59	60	38	43	26	57	30	35	48	14	33	31	44	57	42	42	40	25	365	590	169	148	177	91	146	122	26	40	48	45	71	63	61	51	70	60	0	0
OTU_218	Heterokontophyta	Oomycota					79.27	Published	TTTATCAAGTATCGCAAGTCACTCTGGAGGTTCAGTAGATTTAGCAATTTTTAGTTTACATTTAGCAGGAGCAAGTAGTATTTTAGGTTCAATTAATTTTATTACAACAGTATTTAATATGCGAGCACCAGGAATGAGTATGCATCGTTTACCATTATTTGTATGGTCAATTTTCATTACTGCTTGGTTATTATTACTTTCATTA	91	62	71	93	64	65	136	85	89	150	78	39	62	79	109	139	97	76	73	61	163	208	110	88	153	122	104	111	104	111	54	51	99	69	82	58	61	58	0	0
OTU_219	Arthropoda	Copepoda	Calanoida	Temoridae	Eurytemora	Eurytemora velox	100	Published	ACTGTCTAGAAACATCGCTCACGCGGGGAGGTCCGTAGACTTTGCTATTTTCTCGTTACATTTGGCTGGGGTTAGGTCTATTTTAGGAGCCGTCAATTTTATCAGGACTTTGGGCAATCTCCGTGTATTTGGTATAGTCTTAGATCGTATGCCTCTTTTTGCTTGGTCTGTCCTTATCACCGCAGTATTGCTTTTATTATCCCTT	0	0	47	70	69	74	0	21	23	0	45	15	166	170	102	127	21	12	38	35	0	0	20	32	1	0	20	11	35	34	0	0	61	37	0	0	29	50	0	0
OTU_220	Ochrophyta	Raphidophyceae					75.44	Published	TCTAAGTAGCATCCAAGCGCACTCAGGACCTTCTGTAGATCTAGCTATCTTCAGTCTACACATTTCTGGAGCATCTTCTATCAGGGGAGCTATTAACTTTATCGTTACAATTTTTAACAGGCGCGCTCCTGGACTATTTAGGCACAAAATCCCACTATTTGTGTGATCTGTACTTATTACAGCATTCCTACTACTTCTATCTCTT	45	29	13	29	29	46	57	19	25	20	28	13	12	9	23	33	28	30	16	13	96	299	50	25	66	59	68	47	26	44	21	11	31	32	30	34	18	21	0	0
OTU_221	Rotifera	Monogononta	Ploima	Brachionidae	Brachionus		96.81	Published	CCTTTCTGACTCTACCTATCATAGGGGTGTTTCTGTTGATCTTGCTATTTTTAGTTTACATCTTTCTGGTGTTTCTTCAATTTTAGGTAGAATTAACTTTTTACTATTATTTGTTCACGCACTACTAAAAGTATTTCTTTGGATCGTCTTCCTCTTATGTTATGAGCTCTTGCTGTTACGGCTATTCTTTTAATTACTAGACTA	507	426	678	771	870	855	496	371	243	595	408	157	417	474	394	512	172	217	330	304	1	0	16	13	1	1	42	37	101	94	1130	1246	771	658	566	553	1033	1125	0	0
OTU_222	Arthropoda	Insecta					78.03	Published	ACTATCTGGAATTCAAGCACACAGTGGGCCTGCCGTTGATATGGCAATTTTAAGTTTGCACATGGCAGGGGTTTCTTCTATTTTAGGTGCTATTAATTTTATTACAACAATTATTAATATGAGACCTAAAGGTATGAAAATGCATATGTTACCTTTATTTGTTTGGTCAGTACTTATTACCGCAGTACTACTATTACTTTCTTTG	27	33	39	23	32	43	37	33	40	52	24	5	31	30	42	43	23	22	17	13	177	237	53	46	59	55	55	69	64	47	20	20	52	31	24	35	31	29	0	0
OTU_223	Cryptophyta	Cryptophyceae	Cryptomonadales	Cryptomonadaceae			91.04	Published	ACTTAGTAGTATTTCTGGTCATCCAGGTGGTGCAGTTGATTTAGGTATATTTAGTTTACATGTAGCTGGTGCTTCTAGTATTTTAGGTGCTATTAATTTTATAACTACTATCTTCAATATGAGGGTTCCTGGAATGACAATGCATAGAATACCTCTTTTTGTGTGGGCTGTTTTAATAACTGCTTTTTTACTTCTCCTATCACTA	21	37	31	30	25	31	24	34	27	22	24	25	15	18	14	31	18	22	19	15	225	256	71	65	58	66	59	42	43	40	18	14	55	30	28	32	32	39	0	0
OTU_224	Arthropoda	Malacostraca	Amphipoda	Gammaridae	Gammarus	Gammarus sp. 2119a	99.02	Published	TTAGCCGGCAACTCCGCACATAGCGGAAGCGCTGTAGATCTGGCTATTTTCTCGTTACACTTAGCCGGGGCTTCTTCCATTTTAGGTGCCATCAACTTTATTTCCACCGTCCTAAATATACGCAGACCTGGTATATCCATAGACCAGGCGCCTCTCTTTGTCTGGTCTATTTTTATTACCACTATCCTACTTCTACTATCTCTG	0	0	0	0	0	0	0	0	0	52	0	0	0	0	0	0	0	0	0	0	0	0	0	148	0	0	164	0	0	0	0	0	1	0	0	0	0	0	0	1
OTU_225	Arthropoda	Insecta					80.65	Private	TCTAGCAGGAGTTCAAGCACACTCAGGTGCATCTGTAGATTTAGCTATTTTTAGTTTACACTTAGCTGGTATTTCTTCTATTTTAGGAGCTATCAACTTTATTACAACAATTTTGAACATGAGACCAGACAAAATGAGCATGCACTTACTTCCATTATTCGTCTGGGCTGTATTAATTACAGCTGTTCTATTATTATTGTCTCTA	32	26	16	35	23	40	30	17	25	72	47	14	15	17	14	16	15	24	18	22	743	239	65	38	46	32	55	30	30	33	33	20	9	28	30	12	19	30	0	0
OTU_226	Cnidaria	Anthozoa					79.9	Published	ATTAGCAAGTATAGGATTCCATTCAGGAGGTTCTGTTGATTTAGCTATTTTTAGTTTACACTTAGCTGGTATATCATCTATATTAGGTACAGTAAACTTTATTACTACTATATTTAATATGAGAGCTGCTGGTATGACTATGCACAGATTACCTCTTTTCGTATGAGCTGTGTTAATTACTGCTTTCTTATTAATATTATCATTA	11	25	5	8	8	10	9	10	17	11	14	1	3	3	15	12	11	4	11	3	123	49	20	18	28	20	14	7	7	5	10	13	10	5	2	6	3	1	0	0
OTU_227	Ochrophyta	Raphidophyceae					80.34	Published	ACTAAGTAGTATTCAAGCACACTCAGGACCTTCAGTAGATCTAGCAATTTTCAGTCTACATCTTTCTGGAGCTTCATCTATTATGGGTGCTATTAATTTCATTGTTACTATATTTAATATGCGTGCTCCAGGACTATTTAGGCACAAACTACCTCTATTTGTATGAGCTGTACTAATTACAGCTTTCCTACTACTACTATCTCTA	21	33	18	35	32	28	22	12	27	35	29	10	19	18	17	25	15	19	18	6	158	208	38	21	46	35	39	14	23	29	13	3	48	20	20	11	14	22	0	0
OTU_228	Ochrophyta	Phaeophyceae					78.92	Published	ATTAAGTAGTATTACATCACACTCTGGTGGTGCAGTTGATTTAGCTATATTTAGTCTTCATGTATCAGGGGCTTCAAGTATACTTGGTGCAATAAATTTTATTACAACAATTTTTAATATGAGAGCTGTTGGAATGTCTATGCATCGTCTTCCACTTTTTGTATGGTCAGTTCTTATTACAGCGTTTCTTCTTCTTTTATCTCTT	52	40	30	29	32	43	44	61	23	50	57	22	21	42	31	33	25	28	20	24	170	156	63	23	45	61	40	33	49	41	20	10	26	43	28	34	36	42	0	0
OTU_229	Rotifera	Monogononta	Ploima	Euchlanidae	Euchlanis	Euchlanis dilatata	99.49	Published	CCTCTCAGATTCTAAATATCACTCTGGCATTTCAGTAGATTTAGCTATTTTTAGTCTTCATCTAGCTGGTATTTCATCTATCTTAGGTAGTATCAATTTTTTGACTACTATTATCTGTTCTCGTACAGCAAAAGCTATTTCACTCGATCGTATGCCTCTTATGTTGTGAGCATTTGCTGTTACCTCTGTCCTTCTTGTTACTAGTCTT	2	7	2	1	6	5	5	279	2	19	455	4	4	1	0	13	5	3	1	0	0	19	10	10	19	34	6	10	13	11	3	1	12	5	4	7	84	54	0	0
OTU_230	Cnidaria	Hydrozoa					78.92	Published	ATTATCAAGTATCGCAAGTCACTCGGGCGGATCAGTAGATTTAGCTATTTTTAGTTTGCATTTAGCAGGAGCAAGTAGTATTTTAGGTTCAATTAATTTTATTACTACAGTATTTAATATGAGAGCGCCAGGAATGAGTATGCATAGATTACCATTATTTGTTTGGTCAATTTTTATTACTGCTTGGTTATTAGTGCTTTCATTA	34	32	51	34	61	32	41	40	33	62	36	26	34	40	40	62	35	35	33	42	205	188	66	59	43	68	63	37	64	50	18	24	47	43	35	33	31	18	0	0
OTU_231	Arthropoda	Insecta	Lepidoptera				86.05	Private	ACTTTCAAGTATAGAATATCATTCAGGAGGATCTGTAGATTTAGCAATTTTTAGTTTACATTTAGCTGGAATTTCCTCAATTTTAGGAGCTACTAATTTTATTACTACAATTTTAAATATGAGAGCCCCAGGAATGACTATGCATAAATTACCTTTATTCGTTTGAGCTGTATTTATTACTGCTTGATTATTATTATTATCATTG	29	21	21	21	10	25	12	9	23	52	3	6	27	24	14	16	16	14	14	17	19	117	72	19	38	43	31	61	28	18	23	12	44	21	17	26	11	33	0	0
OTU_232	Rotifera	Monogononta	Ploima				85.64	Published	ACTCTCCGATTCTAAATACCACAGGGGTATTTCTGTTGACTTAGCTATTTTTAGTCTGCATGTCGCAGGTATTTCATCTATTCTGGGTAGAATCAACTTCTTAACTACAATTATTTGTTCTCGTACAACCAAAATAATCTCCTTAGATCGTATGCCTCTAATGCTCTGAGCCCTAGCTGTCACTTCTATTCTTTTAGTTACAAGGCTA	88	47	64	93	159	133	21	74	42	11	131	25	56	96	17	33	1	4	57	51	0	0	23	14	0	0	0	0	41	65	14	15	160	145	65	70	168	148	0	0
OTU_233	Bacillariophyta	Mediophyceae	Thalassiosirales	Skeletonemataceae	Skeletonema		95.1	Published	TTTATCAAGTGCAACAGCTCACTCTGGAGGTTCTGTAGATTTAGCAATATTTAGTTTACATTTATCTGGCGCTTCTTCTATTTTAGGTGCTATCAACTTTATTTGTACTATTTTCAATATGCGAGTAAAAAGTTTATCTTTTCATAATCTTCCTTTATTCGTATGATCTGTTTTAATAACAGCGTTTTTACTGTTATTATCTTTG	355	457	251	440	221	380	229	321	147	308	227	312	162	224	172	295	260	341	236	235	26	31	263	328	328	489	348	351	347	459	226	283	231	266	205	242	162	304	0	0
OTU_234	Arthropoda	Insecta	Diptera	Chironomidae	Tanytarsus	Tanytarsus heusdensis	100	Private	TTTATCATCAAATATTGCTCATAGAGGAGCCTCAGTAGATTTAGCTATTTTTTCTCTTCATTTAGCAGGAATTTCATCAATTTTAGGCTCTGTAAATTTTATTACTACTGCTATTAATATACGATCAAATGGTATCACTTTAGACCGAATACCTTTATTCGTATGATCTGTTGTTATTACTACAATTTTATTACTTTTATCATTA	8	10	15	26	5	9	3	1	6	3	16	4	0	1	15	4	4	2	2	2	41	203	28	8	39	14	22	20	25	39	2	6	12	17	17	4	449	389	0	0
OTU_235	Bacillariophyta	Mediophyceae	Thalassiosirales	Skeletonemataceae			90.05	Published	GTTATCAAGTGCAACTGCACATTCTGGAGGTTCTGTAGATTTAGCTATTTTTAGTTTACATTTATCTGGTGCATCTTCTATTTTAGGTGCTATTAATTTTATTTGTACAATTTTTAATATGCGAGTAAAAAGTCTATCTTTTCATAATTTACCATTATTTGTATGAGCTGTTTTAATTACTGCTTTTTTATTGTTGTTATCATTG	493	366	425	390	343	361	432	416	335	508	441	281	345	388	391	543	450	453	391	381	177	202	549	534	703	603	585	522	573	566	431	465	507	485	450	503	407	532	0	0
OTU_236	Heterokontophyta	Oomycota					80.88	Published	TTTAAGTAGTATTATAGCGCATTCAGGTCCTTCTGTAGATTTAGCTATTTTTAGTTTACATTTATCTGGTGCCGCATCTATTTTAGGTTCAATCAACTTTATTACTACTACATTTAATATGCGCAGTCCAGGCTTGTATATGCATAGATTGCCTTTATTTGTATGGTCGTTATTAATTACTTCTTTTCTTTTATTAATTTCTTTA	15	16	21	27	18	15	29	9	8	15	20	7	9	14	16	16	16	22	9	2	183	192	32	30	45	30	23	31	12	17	6	6	24	12	16	8	7	6	0	0
OTU_237	Ochrophyta	Phaeophyceae					84.52	Published	ACTAAGTTCTGCTTTAAGTCATTCAGGTGGTTCAGTAGATTTAGCTATTTTTAGTCTTCATGTTTCTGGTGCAAGTAGTATTTTAGGTGCTTTAAATTTTATTACAACCATCTTTAACATGCGTGCGCCTGGAATGACACTGCATCGTATGCCACTTTTTGTATGGTCGGTGTTAATTACAGCTTTTCTTCTTCTTCTTTCTCTT	55	34	61	46	55	42	61	37	56	57	49	24	27	31	38	53	60	38	29	28	254	291	73	65	92	123	70	74	54	54	24	24	47	50	43	29	49	41	0	0
OTU_238	Cnidaria	Hydrozoa					78.61	Published	ATTATCAGGTATAGAAAGTCATTCGGGAGGTTCGGTTGATTTAGCTATTTTTAGTTTACATTTAGCCGGAGCATCTTCAATTTTAGGAGCGATGAATTTTATTACCACAGTAATAAATATGAGATCACCTGCTTTAAAAATGAATAGAATTCCTTTATTTGTTTGAGCTGTATTCATTACCGCCTTCTTATTATTATTATCATTA	33	45	33	17	27	31	43	24	24	67	57	28	36	19	41	36	52	40	35	33	348	402	40	48	35	30	67	38	38	26	28	26	30	53	34	37	22	34	0	0
OTU_239	Rotifera	Monogononta	Ploima	Brachionidae			90.69	Published	TCTATCCGATTCTAAATTCCACAGAGGTATCTCTGTAGATTTAGCAATCTTTAGTCTTCATCTAGCTGGTATCTCTTCTATTTTAGGAAGAATCAACTTTTTGACAACTATTATTTGCTCACGTACCGCCAAGGCTATCTCTTTAGATCGAATGCCTCTTATGCTTTGAGCTCTTTCTATTACAGCCGTTCTTTTAATCACCAGTCTT	0	0	1	1	1	0	0	0	0	0	0	0	0	0	0	0	0	0	0	0	0	0	0	0	0	0	0	0	0	0	0	0	0	0	125	108	452	261	0	0
OTU_240	Ochrophyta	Phaeophyceae					76.04	Private	ACTTTCAAGTATCCAAGCACATTCAGGACCATCAGTTGATTTAGCTATCTTTAGTTTCCACTTAAGTGGTACTAGCTCTATTTTAGGTTCAATTAACTTTATTGTAACTATCTTTAATATGAGAGCACCTGGTATGTTCTTCCATAAATTACCACTTTTCGTTTGAGCCGTTCTCATTACCACTTTCTTACTCCTCTTATCATTA	37	31	21	35	77	36	76	31	32	51	26	21	17	32	39	36	36	36	18	32	464	186	67	59	106	80	65	63	38	52	27	22	66	45	34	25	31	50	0	0
OTU_241	Zygomycota						78.22	Private	ACTATCAAGTATTGCTAGTCACTCAGGTGGATCTGTAGATCTTGCTATTTTCAGTCTTCACCTTTCAGGGGCAAGTAGTATCTTAGGAGCTATTAACTTTATTACAACAGTATTTAATATGAGAGCTCCAGGAATGACAATGCACAGACTTCCACTTTTTGTATGGTCAGTGTTTATTACAGCATTCCTACTTCTTTTATCATTA	31	16	54	62	40	42	48	49	32	60	39	9	42	49	41	64	27	40	44	34	153	167	56	65	111	80	55	50	57	35	21	31	41	37	25	33	50	26	0	0
OTU_242	Arthropoda	Collembola					78.33	Published	ATTATCTGGATTAACAGGACATCCAGGAGGGGCCGTAGATTTAGGTATTTTTAGTTTACACCTTGCAGGAGCTTCTTCTATTTTAGGAGCGGTAAACTTCATTACAACAATTATTAACATGCGAGCTCCTGGTATGACGATGCATCGTTTACCATTATTCGTATGGTCAGTGTTTGTAACAGCTATTTTATTATTATTAGCATTA	41	32	46	30	34	37	58	36	18	62	40	17	12	36	29	41	38	37	39	32	397	318	71	72	98	70	74	51	28	32	33	34	62	38	30	34	38	23	0	0
OTU_243	Rotifera	Monogononta	Ploima	Brachionidae			94.95	Published	TCTATCAGACAGAAAATTTCACACAGGAATTTCTGTTGATTTAGCTATTTTTAGTCTCCATTTAGCTGGAATTTCTTCTATTCTAGGAAGAATTAACTTTCTAACAACTATTCTAGTTTCTCGCATGAGATCTAGACTTAGTCTTGCTCGTCTGCCCCTATTCCTATGATCAGTAGCCATCACAGCCGTTCTACTTATTGTTAGTCTC	0	0	0	0	0	0	130	0	0	84	0	0	0	0	0	0	0	0	1	0	0	0	14	23	0	0	86	91	98	89	218	174	0	0	0	0	0	0	0	0
OTU_244	Heterokontophyta	Oomycota					78.72	Published	ATTAAGTTCAATAGTAGCACATTCCGGAGGCTCAGTTGATTTAGCAATATTCAGTTTACATCTTGCAGGTATATCTTCTCTATTAGGTGCTATAAATTTTATCACTACAATATTTAATATGCGCGTACCGGGATTATCTATGCATAAATTACCTTTATTTGTATGGTCGGTCCTAATTACGGCTTTTCTATTATTATTTTCTCTG	245	169	143	164	101	160	204	62	60	149	72	28	65	49	49	65	41	32	100	67	0	0	54	47	39	26	128	115	31	47	25	20	38	49	128	141	274	183	0	0
OTU_245	Rotifera	Monogononta					78.92	Private	TCTTTCAACCTCTAAATACCATAGAGGTGTTTCAGTTGATCTAGCTATTTTTAGTCTTCATTTATCGGGTATTTCTTCTATTTTAGGTAGAATTAATTTCTTGACAACTATCCTTTCTAATCGAATTAATCGAGCTTTTTCTTTAGAGCGTCTTCCTTTAATGCTTTGAGCAATTGCAATTACTGCTGTTTTACTTATTACTAGGCTT	0	0	3	0	0	0	0	0	0	0	0	0	0	0	0	0	0	0	0	0	0	0	0	0	303	216	0	0	0	0	2	0	74	23	2	0	0	0	0	0
OTU_246	Heterokontophyta	Oomycota					79.9	Private	TTTATCTAGTATCACGGCTCATTCAGGTGCAGCTGTAGATCTAGCTATATTTAGTTTACATTTATCTGGAATTTCATCATTGTTGGGTGCAATTAATTTTATTTGTACTATTTTTAACATGCGAACAAAAAGTATGCCTTTCCATAGATTACCTTTATTTGTTTGGTCTATTTTGATTACAGCGTTTTTATTGCTGTTGTCATTG	71	50	65	52	65	54	51	57	35	58	69	22	42	51	44	60	49	34	71	54	15	21	70	67	105	82	70	70	65	68	34	52	74	62	35	54	80	67	0	0
OTU_247	Ochrophyta	Raphidophyceae					76.07	Published	ACTAAGTAGCATCCAAGCACACTCTGGACCTTCTGTAGACCTAGCTATCTTTAGTCTACACATTTCTGGAGCGTCATCAATTAGGGGAGCTATTAACTTTATCGTAACAATCCTAAACAGGCGTGCACCTGGTCTATTTAGGCACAAAATTCCACTATTTGTGTGAGCAGTACTAATTACTGCTTTCCTACTACTACTTTCTCTT	18	29	5	33	33	56	22	24	20	50	25	7	14	12	13	18	14	23	7	13	148	91	25	40	43	43	42	36	44	38	17	23	18	27	10	19	10	14	0	0
OTU_248	Ochrophyta	Raphidophyceae					79.25	Published	ACTAAGTAGTATCCAAGCACATTCAGGACCATCTGTTGATCTTGCAATTTTTAGTCTACACCTATCAGGAGCTTCTTCTATTAGGGGTGCTATTAATTTCATTGTAACAATTTTTAACAGGCGTGCTCCTGGACTATTTAGGCATAAACTACCACTGTTTGTTTGAGCTGTGCTTATTACAGCTTTCCTGCTACTACTATCACTA	11	26	11	11	15	5	17	11	8	24	18	2	6	8	4	2	2	9	13	1	117	61	19	9	45	16	10	16	10	11	4	10	12	9	13	8	3	5	0	0
OTU_249	Heterokontophyta	Oomycota					78.92	Published	TTTGTCTAGTACAGTTGGTCATGCAGGTCCTTCTGTAGATCTTGCAATATTTAGTTTACACATAGCTGGTGCTTCTTCTATATTAGGTGCTATCAATTTTATAGTTACTATTTATAATATGAGAACAAGAGGTTTAAAATTTTATAAATTACCTTTATTTGTTTGATCAGTATTAATTACAGCTTTTTTACTTTTATTATCATTA	22	6	15	14	12	11	23	9	10	26	6	13	16	21	9	22	16	21	19	7	29	152	26	28	48	34	24	6	11	15	10	7	23	10	11	10	11	11	0	0
OTU_250	Arthropoda	Insecta	Diptera	Chironomidae	Micropsectra	Micropsectra atrofasciata	99.51	Private	TCTATCTTCAAGAATTGCTCATAGTGGTGCATCAGTTGATTTAGCAATTTTTTCCCTACATTTAGCAGGAATTTCTTCTATTTTAGGTTCTGTAAATTTTATTACAACAGCAATTAATATACGATCAAATGGAATTACATTAGACCGAATACCTTTATTTGTCTGATCAGTTATTATTACCACTGTTGTACTCCTTCTATCATTA	0	0	61	2	0	0	0	0	0	0	0	0	0	0	0	0	0	0	0	0	0	2643	0	0	14	98	0	138	0	0	0	0	0	0	0	0	0	0	0	0
OTU_251	Bacillariophyta	Bacillariophyceae					78.11	Published	TTTATCAAGTGTAAGTTCTCATTCAGGAGCTGCTGTAGATTTAGCTATATTTAGTTTACATCTTTCAGGAGCTGCTTCAATTTTGGGAGCAATAAATTTTATCTGTACCATTTTAAATATGAGAACTAAAGGACTTTTTATGCACAAACTTCCATTATTTGCTTGGTCTATATTAATTACAGCAGTTTTATTATTGTTATCATTG	88	90	76	78	80	76	100	86	79	92	81	36	83	79	61	71	82	68	87	51	128	33	93	108	151	123	66	66	79	77	58	76	98	108	60	91	75	98	0	0
OTU_252	Arthropoda	Malacostraca					71.91	Private	ATTGAGTAGCAATCTTGGACACTCCGGTGCCGCCGTAGATATGGGAATTTTTAGCTTGCACTTAGCCGGGGCGTCATCAATTTTAGGTGCCATTAATTTTTTGTTAACCATTAGTAACATGCGGTGTATCGGCTTTACATTTTATACCGTACCTCTTTTTGTTTGGTCAGTTTTTATTACTGCAATATTGCTTTTACTCTCTCTA	108	162	99	91	127	212	196	104	90	121	80	40	18	23	13	35	48	52	41	11	1	0	12	38	8	26	95	155	18	24	30	30	84	28	65	61	61	86	0	0
OTU_253	Ascomycota	Leotiomycetes	Leotiomycetes_order_Incertae_sedis				86.27	Published	ATTGTCAGGTATACAAAGTCACAGTGGTCCTAGTGTAGATTTAGCTATATTCGCACTTCACCTATCAGGTATAAGTAGTCTATTAGGAGCAATGAATTTTATAACAACTATACTAAATATGAGAAGTCCAGGAATAAGATTACACAAATTGGCTTTATTTGGATGAGCAGTAGTGGTTACAGCAGTTTTATTACTTTTATCTTTA	37	47	82	99	28	66	52	30	32	88	40	8	3	11	15	15	13	4	19	4	363	379	184	137	94	67	93	86	56	48	53	33	47	79	64	79	78	84	0	0
OTU_254	Basidiomycota						81.86	Private	TCTATCAGGTGTACAAAGCCACTCAGGTGGATCAGTTGACCTTGCTATCTTTAGTCTTCACCTTGCAGGTATTAGTTCTCTACTTGGAGCAATGAACTTCATTACTACAGTACTTAACATGCGAAACCCAGGTATGACTCTTCACAAGCTTCCACTATTCTGCTGAGCAATCATGGTAACAGCTGTTCTTCTACTACTATCTCTA	33	33	47	42	82	38	92	31	70	84	72	29	44	98	20	68	23	36	19	57	173	659	79	109	68	23	78	47	35	56	30	36	53	62	36	65	41	51	0	0
OTU_255	Echinodermata	Asteroidea					62.67	Published	TCTGTCTGATGCTAAGTATCATTCTGGTATTTCTGTTGATCTTGCTATTTTCAGTCTTCATTTAGCTGGTGTCTCTTCTATTTTAGGTAGAATCAATTTTCTTACTACTATTGTGTGTTCTCGTACTACTAAGCTAATCTCTTTGGATCGTTTTATTACTATGGGCTATCTCTATTACTGCTATCTTACTTATTACAAGACTT	15	8	65	62	26	19	85	54	83	120	66	66	155	197	79	80	147	136	59	36	0	0	12	22	0	0	19	14	24	27	35	41	109	107	15	15	27	33	0	0
OTU_256	Arthropoda	Insecta	Coleoptera				87.1	Private	TTTGTCTAGTATTGGTTCTCATTCTGGTGGTTCAGTTGATTTAGCAATTTTTAGTTTACATTTATCTGGTGTTTCTTCTATTGCTGGTTCAATTAATTTTATGACTACAATTATAAATATGCGTGTAAAAGGTTTAACTATGTATCGTATGCCTTTGTTTATTTGAGCTctttttttaacagcttttttattgattttaactttA	23	27	116	157	140	111	49	54	55	16	30	29	23	22	50	93	55	112	26	29	0	0	157	146	135	72	144	40	32	16	27	59	28	19	85	126	19	28	0	0
OTU_257	Rotifera	Monogononta					75	Published	CTTGTCTGATTCTAAGTATCATTCAGGCGTATCTGTTGATATGGCTATTTTTAGCCTGCATTTGGCTGGTATTAGATCTATTCTTGGGTCTATTAATTTTCTAAGTACAATGATTAGAGCTCGGTCGTCTCTTTCTTTTAAGTTTGATTCTATGCCTTTGTTTTTGTGAGCAGTTGCTATTACGGCAGTTCTTTTAGTGACTAGTCTA	2	2	0	0	48	95	332	293	0	356	440	0	10	27	216	263	0	0	0	0	0	0	0	1	0	0	0	0	0	7	0	0	54	61	0	0	0	0	0	0
OTU_258	No Match	No Match	No Match	No Match	No Match	No Match			AGTGATAAACTCGTGCCAGCCACCGCGGTTATACGAGAGGCCCAAGTTGATAGACATCGGCGTAAAGCGTGGTTAAGATTAAAGACAATACTAAAGCCGAACACCTTCAGAGCTGTTATACGCATCCGAAGGTAAGAAGTTCAACCACGAAAGTGGCTTTATAGCCCCTGAACCCACGAAAGCTACGATACAAACTGGGATTAGATAC	54	82	22	29	14	22	30	19	24	29	11	35	34	25	31	36	47	22	38	19	6	31	32	8	47	29	34	24	26	40	23	22	45	28	33	29	26	29	0	0
OTU_259	Cnidaria	Scyphozoa					76.96	Published	TCTTTCAGGAATTCAAGCACATTCAGGTCCATCTGTAGATTTTGCTATTTTTAGCTTACATTTATCAGGGGCAAGTTCTATTATGGGGTCTATTAATTTTATTGTAACCATTATAAACATGAGAGCACCTGGAATGTTTATGCATAAAATGCCATTATTTGCATGATCTATTTTCGTAACATCTTTCTTACTTTTATTATCATTA	20	13	14	15	19	31	24	19	12	52	20	12	7	11	15	21	13	14	9	8	201	227	32	24	38	44	42	30	20	28	17	16	25	22	18	18	12	15	0	0
OTU_260	Heterokontophyta	Oomycota					81.37	Published	TTTATCAAGTATTCAAGCACATTCTGGTGCAGCAGTAGACTTAGCCATTTTTAGCTTACACTTAGCAGGTATATCTTCTATTTTAGGCGCAGTTAATTTTATAACAACAATATGCAATATGAGACCTGAAGGAATGAGTATGCATTTATTACCTTTATTTGTTTGGGCTGTTTTAATTACAGCTGTTTTATTATTATTATCATTA	25	18	29	32	56	40	37	29	18	48	33	6	13	19	15	42	17	29	23	10	137	447	78	55	85	59	83	49	22	19	27	16	58	31	27	35	32	17	0	0
OTU_261	Ochrophyta	Raphidophyceae					85.29	Published	ACTTAGTAGTGCACAAGCACATTCAGGTCCTTCTGTAGATTTAGCAATATTTAGTTTACATTTAGCAGGTGCTGCTTCTATATTAGGATCCATTAATTTTATAACAACAATTTTTAATATGCGCGCTCCTGGAATGACAATGCACCGACTTCCACTATTTGTTTGGTCTGTTCTAGTAACATCATTTTTACTTGTGCTTTCTCTA	21	18	15	24	7	11	26	25	24	36	10	6	12	8	11	19	29	18	17	15	116	213	55	31	29	35	21	27	17	7	10	8	46	28	19	17	11	18	0	0
OTU_262	Cnidaria	Hydrozoa					80.1	Published	ATTATCAGGAATCCAAGCACATTCAGGAGCTTCTGTAGATATGGCAATTTTTAGTTTACACTTATCAGGAGCAAGTTCTATTATGGGTGCTATTAATTTTATTGTTACAATTTTTAATATGAGAGCACCAGGAATGTTCATGTATAAAATGCCACTTTTTGCATGATCTGTTCTTGTAACAGCATTCTTATTATTACTTTCTCTC	3	5	3	11	5	9	15	6	6	24	7	5	3	5	8	16	6	6	5	7	70	51	7	9	24	16	27	13	6	7	3	3	12	8	4	3	12	5	0	0
OTU_263	Heterokontophyta	Oomycota	Pythiales	Pythiaceae	Pythium		95.59	Published	TTTATCAAGTGTTCAAGCACACTCAGGACCTTCAGTAGATTTAGCTATTTTTAGTTTACATTTATCAGGTATTTCATCTTTATTAGGTGCTATAAATTTTCTTTCAACAATATATAATATGAGAGCTCCAGGTTTAAGTTTTCATAGATTACCTTTATTTGTTTGGGCTATTTTCATTACAGCTTTCTTATTATTATTAACATTA	37	23	28	23	8	25	11	10	3	14	11	6	14	11	12	9	5	9	1	7	123	217	50	72	41	45	79	63	11	21	20	27	31	31	21	31	27	31	0	0
OTU_264	Arthropoda	Insecta					76.06	Published	TTTAAGTGGGGTATTTGCACATTCAGGTGCTGGTGTAGATTGTGCAATATTCAGTTTACATTTGGCAGGTATTTCATCAATTGCGGGGGCAATAAATTTTATAGTGACTATTCAAAATATGAGATGTCGTGGTATGACATATAACAGATTACCATTATTTGTTTGAACAGTATTAGTAACAGCAATATTATTGTTACTATCATTA	37	69	45	8	52	52	132	43	38	153	94	32	27	72	66	111	59	39	66	39	11	0	171	68	15	25	74	47	55	55	25	20	81	70	53	67	73	56	0	0
OTU_265	Ochrophyta	Raphidophyceae					79.49	Published	TCTAAGTAGCATTCAAGCACATTCAGGGCCTTCAGTAGACCTTGCCATTTTTAGTCTTCACCTTTCAGGAGCATCTTCTATTAGGGGAGCAATTAACTTTATCGTGACTATTCTAAATAGGCGAGCACCAGGTCTTTTTAGGCATAAGATTCCACTTTTTGTATGAGCTGTTCTAATTACAGCTTTCCTACTACTACTTTCTCTT	49	41	63	34	34	28	42	30	35	58	50	25	28	25	22	37	28	27	44	18	179	229	98	39	68	79	80	35	37	35	9	18	43	34	33	16	31	24	0	0
OTU_266	Cnidaria	Hydrozoa					80.6	Private	ACTAGCTGGTATAGAAAGTCATTCTGGAGGCTCTGTAGATTTAGCAATATTTAGTTTACATTTAGCCGGTGCATCGTCAATTCTAGGAGCAATGAATTTTATTACTACCGTAATTAACATGAGAACTCCTGGATTAAAAATGCATAGATTACCATTATTTGTTTGAGCTATTTTTATTACAGCATTTTTATTAATTTTGTCATTA	37	19	33	17	26	38	45	22	69	44	43	25	56	36	56	42	51	36	41	21	223	634	63	32	75	49	46	45	44	37	26	29	52	51	15	22	36	47	0	0
OTU_267	Mollusca	Bivalvia	Venerida	Cyrenidae	Corbicula	Corbicula sp. 1	100	Private	TCTCTCTAGAAATATTGCTCATTCTGGCCCGTCAGTAGATTTAGCTATTTTCTCTCTTCATTTAGGGGGTATTTCTTCAATTTTAGCTTCAATTAATTTTGTTGTCACTAGATTTTGTATGCGTCCTGGAGCTCAAAAACTAATCCGGACTACAATGTTTATTTGATGTATTGTTGTAACTGGAATTTTGTTGATTATTGCAATG	39	56	40	37	31	57	58	55	45	68	42	35	55	37	42	61	40	56	41	41	181	294	104	104	118	89	95	86	78	88	43	53	98	91	41	38	45	40	0	0
OTU_268	Arthropoda	Insecta	Lepidoptera				85.39	Published	GTTAAGTAGTGCGCAAGCTCATTCAGGTCCTTCTGTTGACTTAGCAATTTTTAGTCTTCATTTATCAGGTGCATCATCTATTTTAGGAGCAATTAACTTTATTACTACTATTTTCAATATGAGAGTTCCTGGAATGTATTTTTACCGTATGCCATTATTTGTTTGGTCTGTATTAGTTACTGCATTTTTATTATTATTATCTTTA	53	64	58	84	72	78	124	75	55	105	82	32	62	74	127	101	55	59	91	86	63	103	60	86	76	69	73	90	95	110	52	48	61	64	57	60	69	58	0	0
OTU_269	Rotifera	Monogononta	Ploima	Synchaetidae	Synchaeta		95.38	Published	ATTATCTGATTCTAAATTTCACTCAGGTATTTCTGTTGATTTAGCTATTTTTAGCTTACATTTAGCTGGTATTTCTTCTATTTTAGGTAGTATTAATTTTATAACTACTATTATTTGTTCTCGTACAACTAAAATAATTAGTATAGATCGTTTACCTTTAATATTATGATCATTAGGTGTTACTGCCTTTTTATTACTAACTACTTTG	33	17	173	171	218	149	33	113	28	33	83	17	162	159	83	86	69	61	105	121	2	1	13	8	31	14	3	1	60	59	132	148	338	340	107	129	61	38	0	0
OTU_270	Basidiomycota	Agaricomycetes					80.6	Published	ACTAGCAAGTATAGAATATCACTCAGGTGGTTCTGTAGATTTAGCTATTTTTAGTTTACATTTAGCGGGTGTTAGTTCTTTATTAGGGGCTTCAAATTTTATTACTACAATTTTAAATATGAGAGCACCTGGTATGACAATGCATAGATTACCTTTATTCGTTTGAGCAGTGTTTATAACAGCTATTTTATTATTATTATCTTTA	15	22	16	24	20	21	34	31	13	35	9	1	10	11	20	18	19	19	8	8	215	315	41	24	57	58	54	35	9	13	13	6	16	20	15	19	24	13	0	0
OTU_271	Echinodermata	Asteroidea					64.1	Published	TCTATCTGATGCTAAGTATCATTCTGGTATTTCTGTTGATCTTGCTATTTTCAGTCTTCATTTAGCTGGTGTCTCTTCTATTTTAGGTAGAATCAATTTTCTTACTACTATTGTGTGTTCTCGTACTACTTAATCTCTTTGGATCGTTTACCTTTATTACTATGGGCTATCTCTATTACTGCTATCTTACTTATTACAAGACTT	244	185	1626	2215	1364	1665	2086	2308	3677	2522	2676	2594	4782	5652	3487	4377	3889	3467	2001	1631	0	0	6	2	0	0	11	11	367	426	1952	1923	4501	4240	84	98	1252	1190	0	0
OTU_272	Heterokontophyta	Oomycota					83.08	Published	TCTATCAAGTATAGAATATCATTCAGGTGGTTCTGTAGATTTAGCTATTTTTAGTTTACATTTAGCAGGTATTAGTTCTATTTTAGGTGCATCTAATTTTATTACTACAATTTTAAATATGAGAGCTCCTGGTATGACTATGCATAGATTACCTTTATTTGTATGAGCTGTATTTATCACAGCAATTTTATTATTATTATCTTTA	29	27	36	39	27	37	34	26	42	62	40	10	21	14	25	26	38	21	34	22	448	282	58	64	65	60	68	73	29	18	17	21	37	43	28	25	19	21	0	0
OTU_273	Ochrophyta	Phaeophyceae					78.92	Published	TTTAAGTAGTATTCAAGCTCATTCAGGACCTGCAGTAGATTTAGCTATTTTTAGTTTACATTTATCAGGTGCGTCATCAATTATAGGAGCTATTAATTTTATTGTAACTGTATTTAATAGGCGTTCAGTTGGTAGGTTTATACATAAGATTAATTTATATGTATGATCTGTTTTAATTACGGCATTTCTTTTATTACTGTCACTT	36	59	41	44	43	26	35	43	38	61	37	12	22	28	38	32	28	25	22	34	466	342	56	46	99	69	87	68	25	34	43	27	52	47	27	37	32	20	0	0
OTU_274	Eukarya_unassigned	Jakobea					77.94	Published	TCTTTCAGGGATTCAAGCACATTCAGGACCATCTGTAGATTTTGCAATTTTTAGTTTACATTTATCAGGGGCAAGCTCAATTATGGGTTCTATTAATTTTATTGTAACAATTATTAATATGAGAGCACCAGGTATGTTTATGCATAAAATGCCATTATTTGCATGATCTATTTTTGTAACATCTTTCTTACTTTTATTATCATTA	23	15	35	28	18	23	23	14	16	35	31	22	19	11	17	24	23	15	10	13	188	238	40	38	64	37	61	38	26	27	11	15	21	25	16	27	12	24	0	0
OTU_275	Arthropoda	Insecta					82.84	Published	ACTATCAGGTATTATAGCACATTCTGGTGGTTCTGTTGATTTAGCAATTTTTAGTTTACATTTAGCAGGGGTATCATCATTATTAGGTGCTATTAATTTTATAACAACTGTTTTTAATATGCGTACTAGTAGTATGTCATTATATGAAATACCTTTATTTGTTTGGTCTGTATTAATTACAGCTTTTTTATTATTATTATCATTA	37	50	63	43	28	21	50	37	27	65	35	18	24	42	44	35	47	19	22	30	334	232	146	58	46	34	69	67	41	26	30	26	59	54	21	38	49	39	0	0
OTU_276	Arthropoda	Insecta					76.62	Private	ACTTAGTTCTATATTAGCGCATTCTGGTTGTGCTGTAGATTTAGCCATATTTAGTCTACATATAGCTGGTATTTCTTCTATCGCAGGTGCTATAAATTTTATTGTAACTATAATAAATATGCGTTGCCCTGGTATGTATTTTAGAAGATTACCACTTTTTGTGTGATCTGTTTTTATTACAGCTATTCTTTTATTGTTATCCTTA	0	0	0	0	0	0	0	0	0	0	0	0	0	0	0	0	0	0	0	0	508	1099	0	0	0	0	0	0	0	0	0	0	0	0	0	0	0	0	0	0
OTU_277	Heterokontophyta	Oomycota					80.88	Published	ATTATCTTCTATTGAAAGTCATTCCGGCGGTTCTGTTGATTTAGCAATTTTTAGTTTACATTTAGCAGGTGCTTCATCTATATTAGGTGCTATGAATTTCATTACTACAGTTCTTAATATGAGATCACCTTCTTTAAAAATGCATAGAATACCTTTATTTGTTTGAGCAGTTTTTATTACAGCTATTTTATTATTATTATCTTTA	41	29	28	25	33	40	54	44	35	74	60	25	38	67	53	51	66	54	43	32	504	546	71	53	99	78	52	75	39	27	34	36	75	61	43	38	38	46	0	0
OTU_278	Basidiomycota	Agaricomycetes					77.94	Published	TCTTTCAAGTATAGAATATCACTCGGGTGGTTCTGTTGATTTAGCGATCTTTAGCTTACATTTAGCTGGGATTAGTTCTATTTTAGGGGCTTCTAATTTTATTACAACTATATTAAATATGAGAGCACCTGGTATGACTATGCATAGATTACCTTTATTCGTTTGAGCTATATTTATTACAGCAATATTATTATTACTTTCTTTA	21	11	27	24	24	37	24	33	36	36	41	15	9	23	25	28	29	16	16	11	177	390	75	43	53	50	42	43	20	24	14	17	47	30	25	32	20	24	0	0
OTU_279	Ochrophyta	Raphidophyceae					79.49	Published	TCTAAGTAGTATTCAAGCACACTCAGGACCATCTGTAGATCTTGCAATTTTTAGTCTACATATTTCTGGAGCATCTTCAATTAGGGGAGCTATTAATTTTATCGTAACTATTCTAAATAGGCGCGCACCTGGACTATTTAGGCATAAAATTCCTCTATTTGTATGAGCAGTACTAATTACTGCATTCCTACTTCTACTTTCTCTT	12	24	9	7	11	17	14	7	7	18	4	6	7	8	6	19	10	11	4	2	129	114	20	24	18	16	25	12	12	16	13	13	23	9	11	8	23	6	0	0
OTU_280	Bacillariophyta	Mediophyceae	Thalassiosirales	Skeletonemataceae	Skeletonema		95.59	Published	TTTATCAAGTGCAACAGCTCACTCTGGAGGTTCTGTAGATTTAGCAATATTTAGTTTACATTTATCAGGTGCGTCATCTATTTTAGGTGCCATTAACTTTATTTGTACAATCTTTAATATGCGAGTAAAAAGTTTATCTTTCCACAATCTTCCACTATTCGTATGGTCTGTTTTAATAACAGCGTTTTTACTGTTATTATCTTTG	41	48	23	44	21	31	31	30	14	30	18	25	24	21	21	29	30	20	27	25	1	2	34	28	33	68	36	24	42	50	22	25	23	31	26	29	17	39	0	0
OTU_281	Bacillariophyta	Bacillariophyceae					76.04	Published	TCTTTCTAGTATAACAGCGCATTCAGGTGGTTCTGTTGATTTAGCTATATTCAGCTTACATCTATCTGGTGTATCTTCTATTGCTGGTTCTATTAATTTTATGACTACAATAATAAATATGCGTGTAAAAGGTTTAACACTGTACCGTTTACCACTGTTTATTTGAGCTTTATTTTTAACTGCTTTTTTATTAGTATTAACACTA	27	18	54	36	33	51	68	45	25	55	52	13	26	20	36	43	38	29	30	7	220	124	48	62	119	70	24	41	49	30	14	23	38	18	29	40	37	25	0	0
OTU_282	Arthropoda	Insecta					76.4	Private	TTTATCGAGTATACAAGCACACTCTGGTGCGAGTGTTGATCTTGCTATATTCAGTCTACATCTAGCAGGTATTTCATCAATATTAGGTGCAATTAACTTTATTTGCACCATATTAAACATGAGGGGGGAGAAAGTGTCAATGCATTTAATTCCTCTTTTTGTTTGGGCTGTTTTAATTACAGCAGTGTTATTATTATTATCTTTA	16	12	13	7	4	13	8	10	5	8	15	4	7	0	18	6	17	16	12	8	50	68	18	20	23	8	36	27	9	17	14	5	8	7	5	8	4	6	0	0
OTU_283	Chlorophyta	Chlorophyceae	Chlorococcales				85.86	Published	ATTAGCAGGTATTGCAAGTCACTCAGGTGGTTCTGTTGATCTTGCTATTTTTAGTTTACACCTTGCAGGTGCTAGTAGTATTATGGGATCTATTAATATAATTACTACTGTTTTAAATATGAGAGCTCCAGGTATGAGCATGCACAGATTACCTTTATTTGTGTGGAGTGTATTCATTACAGCTTTCTTATTAATCTTATCACTT	43	36	38	61	27	31	37	39	28	48	35	13	19	44	44	61	35	25	38	38	239	297	75	48	56	59	66	46	28	41	33	39	36	34	26	30	42	37	0	0
OTU_284	Bacillariophyta	Mediophyceae	Thalassiosirales	Skeletonemataceae			90.2	Published	GTTGTCCAGTGCAACAGCTCACTCTGGCGGTTCTGTAGATTTGGCTATTTTTAGTTTACATTTATCTGGTGCGTCTTCTATTTTAGGTGCTATTAATTTTATTTGTACAATTTTTAATATGCGAGTAAAAAGTCTATCTTTTCATAATCTTCCTTTATTTGTATGGTCAGTTTTAATTACAGCATTTTTATTATTGTTATCGTTA	111	115	116	159	74	89	97	127	74	125	80	96	66	113	89	123	121	128	87	131	33	61	111	125	155	218	166	141	97	117	84	104	99	101	77	76	33	105	0	0
OTU_285	Porifera						78.28	Private	ACTGAGTAGCATTGCTAGTCACTCTGGAGGGGCTGTAGATTTAGCTATTTTTAGTCTTCACTTATCAGGAGCGAGTAGTATTTTAGGGGCAATTAATTTCATTACAACTATTATGAACATGAGAGCTCCAGGGATGTCAATGCACCGCTTACCACTATTCGTATGGTCAGTATTCATTACAGCCTTCTTATTACTACTATCTCTA	45	18	36	32	44	40	53	46	37	85	32	9	17	34	37	26	27	25	31	28	329	371	85	64	115	58	85	61	101	61	36	38	59	48	22	19	26	36	0	0
OTU_286	Ochrophyta	Phaeophyceae					78.92	Early-Release	CCTAAGTAGTATTCAAGCTCACTCAGGACCTGCAGTAGATCTAGCCATCTTTAGTCTACACCTATCTGGTGCCTCATCTATTATAGGAGCCATTAACTTTATTGTAACTATTTTTAATATGCGTGCTCCGGGTATGTTTATACATAAACTTCCACTTTATGTTTGAGCAGTACTTATTACAGCTTTCCTACTTCTACTTTCACTT	12	14	32	22	81	22	17	21	17	42	16	9	25	17	29	32	13	30	17	2	80	0	56	25	91	31	140	80	8	27	19	7	65	33	16	19	9	49	0	0
OTU_287	Arthropoda	Insecta	Lepidoptera				85.39	Published	ATTATCAAGTACATTAGGTCATCCTGGTAGCTCTGTTGATTTTGCAATATTTAGTTTACATATCGCAGGTATATCTTCTATTTTAGGTGCAATTAATTTTATTACTACTATACAAAATATGAGATTAAGAGGATTAAATTTTTTTAAAGTTCCATTATTTGTATGATCAGTATTGATAACAGCAGTTTTATTATTATTATCTTTA	24	21	20	39	23	24	39	20	34	41	43	14	14	27	31	32	45	34	26	24	133	155	19	42	87	50	67	58	35	41	23	13	27	33	22	16	17	30	0	0
OTU_288	Rotifera	Monogononta	Ploima	Brachionidae	Brachionus		95.77	Published	CCTTTCTGACTCTACCTATCATAGGGGTGTTTCTGTTGATCTTGCTATTTTTAGTTTACATCTTTCTGGTGTTTCTTCAATTTTAGGTAGAATTAACTTTTTAACTACTATTATTTGTTCACGCACTACTAAAAGTATTTCTTTGGATCGTCTTCCTCTTATGTTATGAGCTCTTGCTGTTACGGCTATTCTTTTATTAACTACTTTA	46	27	65	55	80	97	22	40	17	41	40	11	54	40	44	38	23	34	29	24	0	0	0	0	0	2	4	6	5	11	138	167	69	88	63	62	117	110	0	0
OTU_289	Ascomycota	Leotiomycetes	Leotiomycetes_order_Incertae_sedis				85.78	Published	ATTATCAGGTATACAAAGTCACAGTGGTCCTAGTGTGGATTTAGCAATTTTTGCTCTTCACTTATCAGGTATAAGTAGTTTATTAGGAGCTATTAATTTTATAGTAACAATACTAAACATGAGAAGTCCAGGTATAAGACTACACAAATTAGCATTATTCGGATGAGCAGTGGTAGTAACAGCAGTGTTATTACTATTATCTTTA	14	10	51	31	14	9	13	4	11	19	3	4	0	0	0	6	0	0	0	3	295	199	86	85	75	44	176	121	56	50	48	31	92	69	40	51	35	20	0	0
OTU_290	Ochrophyta	Phaeophyceae					79.29	Published	ACTTTCAAGTATACAAGCACATTCTGGACCATCTGTAGATCTAGCTATATTTAGTCTACATCTATCAGGTGCTTCTTCTATTAGGGGTGCTATAAATTTTATTGTAACTATTTTTAATAGGCGTGCACCTGGTCTGTTTAGGCATAAGCTACCTCTATTTGCTTGAGCGGTACTAATAACAGCATTTCTACTACTACTATCACTA	39	20	33	47	22	61	34	36	29	31	28	20	21	22	17	25	17	30	12	17	285	358	41	53	70	49	46	60	39	37	16	13	32	43	22	40	18	15	0	0
OTU_291	Annelida	Clitellata	Tubificida	Naididae	Tubifex	Tubifex tubifex	99.51	Private	CCTAGCTAGAAATCTAGCACATTCCGGGCCCTCCGTAGACCTGGCTATCTTCTCACTACATTTAGCTGGTGTAGCATCAATTCTAGGAGCCATTAATTTCATTACCACAATAATCAATATACGCTGAAAAGGCATACGCCTAGAACGAATTCCTTTATTCGTATGATCAGTTATTATTACTGTAATCCTTCTATTACTCACACTC	0	0	0	0	0	6	0	0	0	0	0	0	0	0	4	0	0	0	0	0	0	0	0	0	0	0	0	0	0	0	0	0	0	0	0	0	810	969	0	0
OTU_292	Ochrophyta	Raphidophyceae					76.92	Published	ATTATCAGGAATTCAAGCACATTCAGGACCTTCTGTAGATATGGCTATTTTTAGCTTACATTTATCAGGAGCTAGTTCAATTATGGGGTCAATTAATTTTATCGTAACCATTTTTAACATGCGTGCACCTGGAATGTTTATGCATAAACTTCCTCTTTTTGTATGAGCAGTACTTGTTACAGTATTCTTATTATTACTTTCACTT	8	7	4	8	14	8	7	5	2	13	5	0	8	2	10	6	7	6	0	3	115	64	10	23	15	19	25	21	8	13	7	12	7	9	8	8	7	12	0	0
OTU_293	Arthropoda	Insecta	Lepidoptera				87.64	Published	ATTAGCAGGTATAGAAAGCCATTCAGGAGGTTCAGTAGATTTAGCAATTTTTAGTTTACATTTAGCAGGTGCTTCATCTATTTTAGGAGCTATTAATTTTATAACAACTATTATAAATATGCGTGCTCCTAGCTTAAAAATGCATTGAATACCTTTATTTGTTTGAGCAATTTTTATTACAGCATTTTTATTACTATTATCATTA	56	45	67	68	50	66	36	37	33	67	92	16	18	23	32	33	36	34	35	21	452	220	75	25	70	54	56	60	39	47	34	23	51	63	58	49	31	60	0	0
OTU_294	Mollusca	Gastropoda					79.9	Published	ATTAAGTAGTATTCAAGGACATGCTGGTGCATCAGTAGATTTAGCAATTTTTAGCTTACACATCGCTGGTGTTTCATCATTAGCTGGTGCTATTAACTTTATTGCAACCATTTTTAATATGCGTGCTCGTGGATTATCAATGCACCGTTTACCTTTATTTGTTTGATCTGTATTAATTACTGCATTTTTATTATTATTATCTCTT	19	14	23	28	46	42	49	32	26	55	35	9	28	43	18	51	31	28	21	12	58	112	13	30	50	53	52	34	15	16	25	16	40	28	15	14	15	26	0	0
OTU_295	Heterokontophyta	Oomycota	Pythiales	Pythiaceae	Pythium		95.59	Published	TTTATCTAGTGTTCAAGCACACTCAGGTCCTTCAGTAGATTTAGCTATTTTTAGTTTACATTTATCAGGTATTTCATCTTTATTAGGTGCTATAAACTTTTTATCTACTATTTATAATATGAGAGCTCCTGGTTTAAGTTTCCATAGATTACCTTTATTTGTTTGGTCTGTTTTTATTACAGCTTTTTTATTATTACTAACATTA	45	28	53	33	56	47	26	32	13	41	55	5	24	38	13	21	13	28	18	12	305	207	118	91	92	89	130	111	27	33	49	41	36	35	31	42	27	52	0	0
OTU_296	Arthropoda	Insecta	Lepidoptera				85.39	Published	TTTAAGTTCTGTTCAAGCTCACTCAGGGCCTTCTGTTGATCTTGCCATTTTTAGTCTTCACTTAGCTGGGGCATCTTCTATTTTAGGTGCAATTAATTTTATTACAACTATTTTTAATATGCGTGCGCCTGGGATGTCGATGCATAGATTGCCACTATTAGTATGGGCTGTTTTAATTACAGCCTTTTTACTATTATTATCATTA	38	22	26	30	55	20	49	22	18	30	28	14	10	11	15	36	12	17	11	11	171	245	59	32	51	43	39	34	32	31	7	14	43	22	25	23	17	26	0	0
OTU_297	Ochrophyta	Raphidophyceae					79.28	Published	TCTAAGTAGTATTCAAGCTCATTCCGGACCTTCTGTAGATCTAGCAATTTTTTCTCTACACCTTTCCGGAGCTTCTTCAATTCTTGGAGCAATTAATTTTATTGTAACTATTCTTAATAGGCGTGCTCCAGGACTTTTTAGGCATAAGCTTCCACTTTTTGTTTGAGCTGTTTTTGTTACCGCTTTCCTTCTTCTCCTTTCACTT	27	16	17	37	17	19	42	24	15	28	53	17	3	4	13	17	17	10	15	6	172	97	31	34	53	62	32	62	22	33	13	13	11	30	21	16	17	20	0	0
OTU_298	Bacillariophyta	Bacillariophyceae	Bacillariales				85.07	Published	TCTTTCGGGAATTATTGCACACTCTGGAGGTTCTGTAGATTTAGCAATCTTTAGCCTTCATTTATCAGGAGCTGCATCAATTTTAGGAGCAATCAATTTCATTTGTACTATTGTAAATATGCGAACTGAAAGTTTACCATTCCATAAATTACCTTTATTCGTATGGTCGGTTTTCATTACAGCTATTTTACTATTATTATCACTT	42	29	56	45	34	50	56	54	76	80	65	19	46	75	86	102	54	59	79	65	164	313	42	45	62	42	54	48	56	31	38	37	65	80	36	60	44	74	0	0
OTU_299	Rotifera	Monogononta	Ploima	Synchaetidae	Polyarthra		96.95	Published	TCTTTCTGACTCTAAGTACCATTCAGGTATTTCAGTAGATTTAGCTATTTTTAGTCTTCATCTTGCTGGAGTTTCATCTATTTTGGGTAGAATTAATTTTCTTTCAACAATTATTTGCTCTCGAACAACTAAGATAATCTCTCTTGACCGTTTACCTTCCTGTGATCTGTATCTATCACTGCTATTCTATTAATTACAAGATTA	299	313	7	9	1694	1646	1071	2106	1287	1201	2385	1048	2266	2793	2953	4078	834	805	3123	2787	3	1	260	220	611	561	1136	904	651	711	914	1035	2373	2839	294	275	32	29	0	0
OTU_300	Rotifera	Monogononta	Ploima	Synchaetidae	Polyarthra		97.06	Published	TCTATCAGACTCAAAATTTCATTCGGGCATTTCTGTAGATTTAGCTATCTTTAGACTTCATTTAGCTGGTGTTTCTTCAATTCTAGGGAGAATTAACTTTCTAACTACTATCATTTGTTCTCGTACTACTAAGTTGGTGTCTTTAGATCGCCTACCACTTTTACTCTGAGCTATGTCTGTTACTGCCGTTCTTCTAGTTACTAGACTT	0	0	0	0	209	168	0	0	0	0	0	0	36	24	0	0	0	0	0	0	0	0	0	0	0	0	2	1	421	431	151	196	0	0	0	0	0	0	0	0
OTU_301	Rotifera	Monogononta	Ploima	Synchaetidae	Polyarthra		98.96	Published	TCTGTCTGATGCCAAATACCATTCTGGTATTTCTGTTGATCTTGCTATTTTCAGTCTTCATCTGGCCGGAGTCTCATCTATTCTGGGTAGAATTAATTTTCTTACAACAATTATCTGTTCTCGTACTACTAAGCTAATTTCTTTAGACCGCTTACCTTTACTGCTCTGAGCTATGTCTATTACAGCTATTCTACTTGTTACAAGTTTA	41	56	110	75	99	118	0	30	0	0	52	0	0	0	0	0	63	52	0	0	0	0	9	0	0	0	0	0	0	0	21	14	59	30	0	0	95	116	0	0
OTU_302	Arthropoda	Insecta	Diptera	Chironomidae	Polypedilum	Polypedilum nubeculosum	99.51	Private	TCTTTCAGCAAGTATCGCGCACAGAGGGGCTTCAGTAGATTTAGCCATTTTTTCTCTTCATTTAGCAGGGGTGTCCTCAATTTTAGGATCTGTAAATTTTATTACAACAGTTATTAATATGCGCTCTAGAGGTATTACTTTAGACCGAATACCTTTATTTGTCTGATCTATTGTTATTACAACAGTATTACTATTATTATCTTTA	435	323	17	0	3	1	14	0	7	24	6	1	7	21	1	9	2	0	3	0	48	11	5	1	3	22	37	10	1	11	2	4	3	11	8	5	34	35	0	0
OTU_303	Ochrophyta	Phaeophyceae					78.82	Published	ATTATCAGGAATCCAAGCTCACTCAGGACCTTCTGTAGATTTAGCTATTTTTAGTTTACATTTATCAGGAGCAAGTTCTATTATGGGTTCTATTAATTTTATTGTTACAATTTTTAATATGAGAGCACCAGGTATGTTTATGTACAAAATGCCACTTTTCGCATGAGCACTCCTTATTACAGCTTTCTTATTATTACTTTCTCTT	7	14	13	4	9	12	9	7	2	18	8	8	3	3	13	17	6	4	7	5	65	131	19	14	34	21	15	10	19	2	3	3	7	9	10	9	12	6	0	0
OTU_304	Heterokontophyta	Oomycota					77.11	Published	TTTAAGTAGTATAGAAGCGCATTCGGGGCCGGCAGTTGATTTAGCCATTTTTAGTTTACACTTAGCAGGTATATCCTCCTTATTAGGCGCCATCAATTTTATAACAACGATTTTTAATATGAAACTACCGCATTTAACAATGTACAAAACACCGCTTTTTGTATGGGCAGTTTTAATTACAGCCGTTTTGTTGTTATTGTCTTTG	40	18	19	36	12	31	27	10	27	24	18	12	4	0	5	13	6	3	18	11	1058	652	2	0	1	1	13	18	1	1	0	2	19	15	28	20	32	15	0	0
OTU_305	Arthropoda	Insecta	Lepidoptera				85	Published	ATTATCAAGTGTACAAGCACATTCTGGACCTTCTGTAGATTTAGCAATTTTTAGTTTACATTTAGCAGGAGCTTCTTCTATTTTAGGTGCAATTAATTTTATTGTTACTATTGTAAATATGAGATGTCCAGGGATGTTTATGCATAAAATTCCATTGTATGTTTGAGCTGTATTTATAACAGCATTCTTATTATTATTTTCTATG	18	18	15	10	16	22	15	21	7	18	5	4	9	28	21	10	15	11	12	6	176	300	17	34	49	24	25	21	15	15	4	14	25	28	10	10	12	7	0	0
OTU_306	Cryptophyta	Cryptophyceae	Cryptomonadales	Cryptomonadaceae			94.61	Published	TTTAAGTAGCATTTCTGGTCATCCAGGTGGAGCCGTCGATTTAGGTATATTTAGTTTACATTTAGCTGGGGCTGCTAGTATACTTGGAGCTGTTAACTTTATAACTACTATTTTTAATATGAGAGCACCTGGTATGACTATGCATAGAATACCTTTGTTCGTATGGTCTGTTTTAATCACAGCTTTTTTACTATTACTCTCTTTA	27	20	17	15	8	11	19	13	24	25	6	6	8	10	11	11	15	17	4	14	99	186	51	53	59	61	63	36	29	31	9	23	27	33	19	24	17	27	0	0
OTU_307	Rhodophyta	Florideophyceae					75.76	Published	TTTGAGCTCTGTTTTAGCACATTCAGGTTGCGCTGTAGATTTAGCTATATTTAGCTTACATATAGCAGGTGTTTCTTCAATAGCGGGAGCAATAAATTTTATTGTAACTATAATAAATATGAGATGTCCTGGTTTGTATTTTAGAAGATTACCTTTGTTTGTATGATCTGTTTTTGTAACTGCTTTTTTGCTTTTATTATCTTTA	0	0	56	36	5	9	18	7	12	21	20	3	29	22	57	34	1	0	11	7	165	198	94	47	50	38	20	12	71	53	88	61	75	76	25	29	36	44	0	0
OTU_308	Arthropoda	Insecta	Hemiptera				86.07	Published	ATTATCTAGAATAAATTTTCATTCTGGTTTTTCTGTAGATTTAGCTATTTTTTCTTTACATATAGCTGGAATTTCTTCTATTTTGGGGGCCATTAATTTTATTACAACAATTATTAATATACGTTCTGTTTTTATAAAATTTGAATTAATTCCTTTATTTGTTTGATCTGTATTTATTACAGCTATTTTATTATTATTATCATTG	0	0	0	0	0	0	0	0	0	0	0	0	0	0	0	0	0	0	0	0	0	1	0	0	22	15	0	0	0	0	0	0	0	0	0	1	987	1084	0	0
OTU_309	Bacillariophyta	Mediophyceae	Stephanodiscales				87.56	Published	GTTGTCCAGCGCAACCGCACATTCTGGAGGTTCTGTAGATTTAGCTATTTTTAGCCTGCATTTATCAGGCGCATCTTCTATATTAGGAGCTATTAATTTCATTTGTACAATCTTCAATATGCGAGTAAAAAGTTTATCTTTTCATAATTTACCATTATTTGTGTGGTCTGTTTTAATTACAGCATTTTTATTATTGTTATCGTTA	10868	9761	9227	10118	7886	8999	9929	11052	7117	12384	10977	8584	7256	8703	9269	12288	9052	11029	11096	9028	6161	7699	10168	8904	12645	12133	13055	10958	7864	9339	6881	8759	9498	8822	7362	8049	6090	8839	0	0
OTU_310	Ochrophyta	Phaeophyceae					77.45	Published	GCTAAGTAGTATATTAGCGCACTCAGGTCCTGCCGTAGATTTAGCTATTTTTAGCTTGCATTTATCGGGGGCAGCGTCTATACTTGGTGCAATTAATTTTATTACTACGGTATTTAATATGCGTTCGCCTGGGTTACATTTTCATAGATTAACGCTATTAGTCTGGGCTCTATTAATTACTTCATTTTTATTATTGCTTTCATTG	20	27	18	19	25	32	16	28	20	28	40	12	12	18	18	39	15	18	16	17	94	120	49	33	63	44	43	40	41	32	19	16	30	28	16	13	17	15	0	0
OTU_311	Cryptophyta	Cryptophyceae	Cryptomonadales				87.56	Published	CTTAAGTAGTATCTCTGGTCACCCTGGTGGCGCTGTAGATCTGGGTATTTTTAGTCTCCATTTAGCTGGCGCTGCAAGTATTTTAGGCGCAATTAATTTTATAACTACTATCTTTAATATGAGAGGGCCTGGTATGACTATGCATAGAATACCTTTATTTGTATGGTCTGTTCTTATTACAGCTTTTTTACTACTACTCTCCTTG	16	20	16	9	7	6	11	30	8	16	22	9	5	7	14	8	15	20	6	16	96	143	44	36	34	25	21	8	16	8	10	19	29	42	18	20	8	16	0	0
OTU_312	Porifera	Demospongiae					76.41	Published	GTTATCAGGTATTGAATTCCACTCAGGGGGGTCTGTAGATTTAGCCATCTTCAGTCTTCATCTGGCTGGTATTAGCTCAATCTTAGGTGCAATGAATTTCATCACAACAATTCTTAACATGAGAACTCCTGGTATGACTATGCACAGACTACCACTCTTTGTTTGAGCCGTGTTTATAACTGCTATTCTGTTATTATTGTCGCTA	3	11	2	7	3	13	7	3	8	18	12	2	6	4	14	12	13	7	4	4	80	100	15	12	18	25	14	8	8	5	7	13	32	12	12	17	1	6	0	0
OTU_313	Porifera	Demospongiae					78.28	Published	ACTGTCTAGTATTGAGTACCACTCTGGGGGTTCTGTAGATTTAGCTATATTTAGCTTACATTTAGCCGGGATAAGTTCTATATTAGGTGCATCTAACTTTATTACAACAATTTTAAATATGAGAGCTCCTGGTATGACTATGCATAGATTACCATTGTTCGTATGAGCTGTTTTAATTACGGCCGTATTATTATTAATTTCATTA	9	12	11	21	11	7	20	18	8	31	9	4	5	12	16	17	13	11	14	9	124	172	31	32	27	34	35	24	7	14	16	6	19	18	14	5	15	6	0	0
OTU_314	Arthropoda	Insecta	Hymenoptera				85.53	Published	TTTATCTAGTATTTTATATCATTCTTCTATTTCTGTAGATTTAGGTATATTTTCTTTACATTTAGCCGGTTTATCTTCAATGTTAGGTTCTATAAATTTTATGGTAACTGTAATGAATTTAAGAGCTCCAGGTATAAAATATACAGGATTAAATTTATATGTTTGAAGTATAATAATAACTTCTGTATTATTAATATTAGCTTTA	41	30	34	40	24	37	46	38	49	50	32	22	33	40	29	45	26	39	32	43	496	321	63	33	74	85	59	45	29	25	24	15	73	64	30	27	25	30	0	0
OTU_315	No Match	No Match	No Match	No Match	No Match	No Match			AGTGATAAACTCGTGCCAGCCACCGCGGTTAAACGAGAGGCCCCAGTTAATAATACACGGCGTAAAGGGTGGTTAAGGAAAGTATTAACAATAAAGCCGAATGGCCCTTTGGCTGTCATACGCTTCTAGGTGTCCGAAGTTCAACATACGAAAGTAGCTTTAATAACGCCCACCTGACCCCACGAAAGCTGAGAAACAAACTGGGATTAGATAC	29	29	31	45	55	49	41	40	45	44	58	20	21	29	35	41	40	38	62	37	64	44	34	47	40	29	54	44	39	61	88	37	67	60	34	37	41	64	0	25
OTU_316	Ascomycota	Leotiomycetes	Leotiomycetes_order_Incertae_sedis	Leotiomycetes_family_incertae_sedis			91.67	Published	ATTAAGTGGAGTACAAAGTCACAGTGGACCAAGTGTTGATTTAGCTATCTTTGCTTTACACTTATCGGGTATTAGTAGTTTATTAGGTGCAGTTAACTTTATAACAACTATACTTAACATGAGAAGTCCAGGTATAAGATTACACAAATTAGCTTTATTCGGATGAGCAGTTGTTGTTACAGCTGTATTATTATTATTATCATTA	29	29	60	82	45	38	37	27	37	54	31	23	34	37	55	69	34	19	41	27	243	224	84	95	81	81	119	98	60	53	49	25	35	37	25	32	92	134	0	0
OTU_317	Bacillariophyta	Mediophyceae	Thalassiosirales	Skeletonemataceae			90.05	Published	GCTATCAAGTGCAACTGCACATTCTGGAGGTTCTGTAGATTTAGCTATTTTTAGTTTACATTTATCTGGTATGTCTTCTATTTTAGGTGCTATTAATTTTATTTGTACAATTTTTAATATGCGAGTAAAAAGTTTATCTTTTCATAATTTACCATTATTTGTATGAGCTGTTTTAATTACTGCGTTTTTACTGTTATTATCTTTG	44	31	23	33	36	27	47	24	34	33	38	11	16	35	26	43	23	34	21	36	7	35	39	42	45	52	35	51	54	34	48	39	50	28	29	27	23	25	0	0
OTU_318	Rotifera	Monogononta	Ploima	Synchaetidae	Polyarthra	Polyarthra dolichoptera	98.89	Published	TCTGGCAGATGCTAAATATCATTCAGGTATTTCTGTTGATTTGGCGATTTTTAGTCTTCATTTAGCTGGAGTTTCTTCTATTTTAGGAAGAATTAATTTTTTAACTACTATTATTTGTTCTCGTACTACAAAATTGATTTCTATGGATCGTTTACCTTTGTTATTATGAGCAATTTCAGTTACAGCTGTTAATTACAAGATTA	316	328	337	392	1386	1510	596	526	328	620	638	239	1209	1221	1121	1510	283	233	822	821	95	98	41	53	80	87	968	817	1247	1360	570	661	192	196	608	650	1618	2059	0	0
OTU_319	Heterokontophyta	Oomycota					84.08	Published	ATTATCAGGAATTTTAGCACATTCAGGACCTTCTGTAGATTTAGCTATTTTTAGTTTACATTTATCAGGAGCAAGTTCAATTATGGGGTCTATTAATTTTATAGTTACAATTTTTAATATGAGAGCTCCAGGACTTTTTATGCATAAATTACCATTATTTGTTTGAGCTGTATTAGTTACTACATTTTTATTATTATTATCTTTA	23	7	15	12	32	18	35	14	12	35	21	8	11	18	23	19	15	18	11	23	314	365	42	31	48	33	50	33	22	21	14	8	50	30	7	10	13	8	0	0
OTU_320	Arthropoda	Insecta					75.49	Published	ATTATCAAGTACATTAGGTCATAATGGTATGGCGGTTGACTTTGCAATTGTTTCTTTACATATGGCAGGTGTTTCATCTTTAGCAGGTTCGATAAATTTTATTGTAACTATTTTTAATATGAGAGCTCCTGGTATGGATTTAAATAGATTAAACTTATTTGTTTGATCTATGTTAGTTACATCTTTTTTATTATTATTATCTTTA	32	41	40	32	23	31	53	30	15	71	34	20	20	44	34	38	37	42	23	21	244	374	51	45	75	60	44	46	36	45	20	36	45	56	24	27	18	34	0	0
OTU_321	Cryptophyta	Cryptophyceae	Pyrenomonadales	Pyrenomonadaceae			90.2	Published	TTTAAGTAGCGTTGAGGGTCATCCGAGTGCAGCTATTGATTTAGGTATTTTTAGTTTACATGTTGCTGGAGCTTCCTCTATTTTAGGAGCTATTAATTTTATTACTACAATTTTTAATATGAGATGCCCGGGTATGACATTTCATAGATTACCTCTTTTTGTGTGGGCTGTTTTAATTACTGCGTTTTTATTACTTTTATCTTTA	15	14	24	32	17	14	36	27	34	51	39	19	26	21	25	42	32	20	14	18	360	496	39	49	94	59	31	36	29	23	17	28	71	45	39	33	37	31	0	0
OTU_322	Ochrophyta	Phaeophyceae					83.08	Published	TTTAAGTTCTGTTCAAGCCCATTCGGGACCTTCTGTTGACTTAGCTATTTTTAGCCTTCATTTGGCTGGTGCTTCTTCTATTTTAGGTGCCATAAATTTTATTACAACAATTTTCAATATGCGTGCTCCAGGTATGTCTATGCACCGCTTACCACTTTTTGTTTGGGCCGTTTTAATTACTGCTTTTCTTCTTTTATTATCACTA	42	21	39	43	36	26	47	28	23	46	43	14	14	21	25	26	26	33	21	6	275	240	44	44	45	44	63	42	25	27	23	13	31	34	17	29	18	27	0	0
OTU_323	Rotifera	Monogononta	Ploima	Mytilinidae			90.4	Private	TTTAGCTGATTCTAAGTACCACAGAGGAATCTCTGTTGACTTAGCAATCTTTAGTTTACACTTAGCTGGTATCTCTTCTATTTTAGGTAGAATTAACTTTCTATCTACTATTATTTGTTGTCGTACAACAAAGATAATTTCAATAGATCGTCTTCCTTTAATGCTCTGAGCGTTAGCTGTTACAGCTCTGCTTTTAGTGACAAGACTT	79	48	0	0	0	0	0	0	0	0	0	0	0	0	0	0	0	0	0	0	0	0	0	0	0	0	0	0	0	0	16	9	0	0	0	0	147	116	0	0
OTU_324	Rotifera	Monogononta	Ploima	Synchaetidae	Polyarthra		97.98	Published	TCTTTCTGACTCTAAGTACCATTCAGGTATTTCAGTAGATTTAGCTATTTTTAGTCTTCATCTTGGAGTTTCATCTATTCTGGGTAGAATTAATTTTCTTTCAACAATTATTTGTTCTCGAACAACTAAGATAATCTCTCTTGACCGTTTACCTTTATTCTTGTGATCTGTATCTATCACTGCTATTCTATTAATTACAAGATTA	0	0	13	20	5	2	3	89	1	0	88	12	13	25	9	21	2	3	26	44	0	0	1	0	0	0	11	10	1	1	0	2	22	23	1	1	0	1	0	0
OTU_325	No Match	No Match	No Match	No Match	No Match	No Match			TCTTAGTGGTATCGAGGCGCACTCTGGACCTGCCGTTGATTTCGGTATTTTCAGCTTACACCTTGCCGGAATGTCTTCCATTCTAGGTGCGATTAACTTCATTGTTACCATTTTCAATATGCGCGCACCTGGAATGCCACTTTACGTGATGCCCCTTTTTGTGTGAAGCATCCTAATTACTGCGTTCCTTCTACTACTTTCCCTT	99	36	152	117	51	43	53	15	31	86	12	12	7	3	8	18	0	0	11	1	35	164	46	35	157	11	117	33	24	13	35	21	22	48	159	262	137	77	0	0
OTU_326	Cnidaria	Cubozoa					77.3	Published	ACTTAGTAGCATTCAATTCCACTCAGGACCTTCTGTAGATCTTGCTATCTTTAGCCTTCACATCGCTGGAGCTTCTTCTATTAGGGGTGCAATTAACTTTATTGTAACAATTTTCAATAGGCGTGCACCTGGTCTTTTTAGGCACAAGATCCCTCTATTCGTATGAGCTGTATTTATTACAGCTTTTCTTCTACTTCTTTCTCTC	4	29	12	19	14	30	9	22	14	33	41	2	3	6	12	14	6	9	1	1	205	143	18	16	21	29	31	18	10	12	7	9	6	15	10	5	8	6	0	0
OTU_327	Echinodermata	Crinoidea					78.43	Published	TTTATCTAGTATTACTGCTCATTCTGGTGGTTCTGTTGATTTGGCTATTTTTAGTTTACATTTATCTGGTGTTTCTTCTATTGCCGGTTCAATTAATTTTATGACTACAATAATAAATATGCGTGTTAAAGGTTTAACTTTATATCGTTTACCTTTATTTATTTGAGCTTTATTTTTAACAGCTTTTCTTCTTGTTTTAACTTTA	64	39	32	36	35	38	8	13	21	32	15	31	24	20	42	45	13	40	42	25	343	383	19	35	97	28	30	49	23	29	16	19	43	44	21	37	25	29	0	0
OTU_328	Ascomycota	Leotiomycetes	Leotiomycetes_order_Incertae_sedis				88.73	Published	TTTAAGTGGAGTACAAAGTCATAGTGGTCCTAGTGTTGATTTAGCTATTTTTGCTTTACACTTATCTGGTATTAGTAGTCTTTTAGGTGCTATTAATTTTATTACTACTATACTTAATATGAGAAGTCCTGGTATTAGACTTCACAAATTAGCTTTATTCGGCTGAGCTGTTATTGTTACTGCTGTTTTATTATTATTATCTTTA	48	47	26	38	23	32	27	23	15	46	14	9	15	9	8	11	7	6	7	4	169	545	69	63	161	121	62	37	62	53	21	11	29	43	28	34	33	52	0	0
OTU_329	Ascomycota	Leotiomycetes	Helotiales	Helotiales_incertae_sedis	Rhynchosporium	Rhynchosporium orthosporum	98.53	Published	TTTAAGTGGAGTACAAAGTCATAGTGGACCTAGTGTAGATTTAGCTATATTTGGATTACATCTATCTGGTGTAAGTAGTTTATTAGGTGCTGTAAACTTCATTACTACTATACTAAATATGAGAAGTCCAGGTATCAGGTTACATAAATTAGCTTTATTCGGATGAGCTGTAGTTGTTACTGCAGTATTATTATTATTATCATTA	29	26	35	26	5	39	15	15	26	17	6	12	8	9	17	19	3	6	3	3	207	169	103	80	99	76	58	31	34	19	14	10	21	31	17	35	78	93	0	0
OTU_330	Arthropoda	Insecta					79.78	Private	TTTAAGTAGTATACCAGCGCATGCAGGATCTTCTGTTGATTTTGCAATATTAAGTTTGCATATTGCTGGTGCTTCTTCTATTGCTGGTGCTATTAATTTTATAACAACAATTTTTAATATGCAAACTAATGGTTTAGCGTTCCATCGCTTACCTTTATTTGTTTGATCCGTTTTAATTACTGCAGTTTTATTATTATTATCGTTA	27	39	32	28	35	34	47	44	31	55	46	13	40	42	21	47	26	46	22	22	122	581	52	61	75	48	66	41	36	34	44	14	28	52	25	26	38	20	0	0
OTU_331	Ochrophyta	Phaeophyceae					79.8	Published	ATTAGCAGGAATTCAAGCACACTCAGGACCTTCTGTAGATTTAGCTATTTTTAGTTTACATTTATCAGGAGCAAGTTCTATTATGGGTTCTATTAATTTTATTGTTACAATTTTTAATATGAGAGCACCAGGTATGTTTATGTATAAAATGCCACTTTTTGTATGAGCACTCCTTATTACAGTGTTCTTATTATTACTTTCTCTT	25	8	4	3	17	7	18	9	4	16	8	2	8	9	9	5	10	6	14	4	26	58	6	1	19	17	22	12	7	11	1	9	13	9	5	5	4	10	0	0
OTU_332	Ascomycota	Leotiomycetes	Leotiomycetes_order_Incertae_sedis	Leotiomycetes_family_incertae_sedis			90.55	Published	ACTATCTGGATTACAAAGTCACAGTGGACCTAGTGTAGATTTAGCTATTTTTGCTTTACATCTATCAGGAATAAGTAGTTTATTAGGAGCTATGAATTTTATAACTACAATATTAAACATGAGAAGTCCAGGTATAAGATTACATAAATTAGCTTTATTTGGATGAGCTGTAGTTATTACTGCAGTATTGTTATTATTATCTTTA	31	8	24	25	26	42	38	19	25	32	25	10	16	27	24	22	21	20	22	31	192	160	36	38	29	28	92	59	71	93	55	56	77	79	17	14	33	26	0	0
OTU_333	Ascomycota	Sordariomycetes	Hypocreales	Bionectriaaceae			91.54	Private	TTTATCAGGATTACAAAGTCATAGTGGACCTAGTGTAGATTTAGCAATATTTGCTTTACATTTATCAGGTATAAGTAGTTTATTAGGAGCTGTAAATTTTATAACAACAGTAATAAACATGAGAACACCAGGAATCAGATTACATAAATTAGCTTTATTTGGTTGAGCTGTAGTTATAACAGCAGTATTATTATTATTATCTTTA	23	18	25	26	14	14	33	24	18	59	27	10	20	17	45	37	40	12	25	18	167	296	53	50	57	48	51	45	14	31	24	14	31	29	24	26	41	30	0	0
OTU_334	Cnidaria						82.35	Private	TTTAGCTGGAATTGAAAGCCATTCAGGTGGCTCTGTAGATTTAGCTATTTTTAGTTTACATTTAGCAGGTGCATCTTCTATTTTAGGAGCAATAAATTTTATTACTACAGTAATTAATATGCGTGCTCCTGGTTTAAAAATGCATAGAATACCTTTATTTGTTTGAGCAGTATTTATAACAGCATTTTTATTATTATTGTCATTA	23	29	23	8	32	18	24	23	18	13	17	7	16	20	26	40	26	22	27	17	360	147	41	30	41	36	51	37	21	19	16	10	42	17	10	13	11	23	0	0
OTU_335	Arthropoda	Insecta	Lepidoptera				85.39	Private	ATTAGCAAACAGTATATTTCATAGAGGGGTATCTGTAGATTTAGCAATTTTCAGACTTCATTTAGCAGGAATCTCATCAATTTTAGGAGCAATTAATTTTATTACCACAATTATCAATATAAACACTACCCAGTCATCTGAACAAACCCCACTGCTAGTTTGATCAGTAATAGTAACTGCAATTTTATTGTTACTATCGTTA	0	0	0	0	0	0	0	0	0	0	0	0	0	0	0	0	0	0	1	0	0	0	0	4	0	0	0	0	0	0	0	0	0	0	438	573	10	3	0	0
OTU_336	Ochrophyta	Raphidophyceae					80.88	Published	ATTATCTAGTATTGAAAGTCACTCAGGAGGTTCTGTAGATTTAGCAATTTTTAGTTTACATATTGCTGGTGCTTCATCAATTTTAGGTGCAATTAATTTTATTACTACTGTTTTAAACATGAGAGTTCCGGGAATGGGAATGCATCAAGTTCCACTATTTGTTTGAGCAGTATTTATTACTGCTATTTTATTATTATTATCATTA	13	20	19	25	27	16	34	17	27	48	11	18	12	25	30	36	32	18	16	10	92	158	28	26	52	28	18	36	19	32	13	19	32	23	18	4	7	23	0	0
OTU_337	Ochrophyta	Raphidophyceae					85.47	Published	ATTAAGTAGTATTCAAGCACACTCTGGACCTGCTGTTGATTTAGCAATCTTCAGTTTACATTTATCTGGAGCAGCATCAATTTTAGGATCTATTAACTTTATTACAACAATTTTTAACATGAGAGCACCTGGATTAACAATGCATAGATTACCATTATACGTTTGGGCTGTTCTTGTTACATCATTTTTATTACTTCTTTCATTA	9	10	8	13	10	13	18	20	10	12	13	2	12	7	10	13	12	14	12	5	80	75	18	23	47	34	29	27	16	12	5	3	14	26	3	10	4	10	0	0
OTU_338	Ochrophyta	Raphidophyceae					78.63	Published	TTTAAGTAGTATTCAAGCTCATTCAGGACCTGCCGTAGATTTAGCTATTTTTAGTTTACATTTATCAGGTGCTTCATCTATTATGGGAGCCATTAATTTTATTGTAACTGTTGCTAATATACGAGCAGTTGGTATATTTATGCATAAAATTAATTTATATGTTTGAGCTGTCTTAATTACAGCTTTCCTTTTATTATTATCACTT	27	20	20	28	11	34	32	26	21	40	28	12	18	19	24	16	30	28	33	18	293	191	81	44	69	49	46	48	22	28	12	13	46	27	18	20	13	37	0	0
OTU_339	Arthropoda	Insecta					76.96	Published	TCTTTCTAGTATTACTGCACATTCTGGTGGTTCTGTTGATTTAGCTATTTTTAGTTTACATTTATCAGGTGTTTCTTCTATTGCTGGTTCAATTAATTTTATGACAACAATAATAAATATGCGTGTAAAAGGTTTAACTTTATATCGTTTACCACTATTTATTTGAGCTTTATTTTTAACTGCATTTTTATTGGTTTTAACTTTA	41	33	31	48	48	39	31	31	39	40	34	21	43	56	38	35	61	42	45	43	5	13	112	71	122	122	87	91	21	27	35	47	57	87	33	34	22	10	0	0
OTU_340	Ochrophyta	Phaeophyceae					80.6	Published	CCTAAGTAGTATTATTGCTCATTCAGGTCCTTCTGTTGATTTAGCTATTTTTAGTTTACATCTATCTGGTGCGGCCTCAATTTTAGGAGCTATAAATTTTATTACTACCACATTTAATATGCGTAGTCCAGGCTTATACATGCACAGATTACCTTTATACGTTTGGTCTTTACTAATAACATCTTTTCTTCTACTAATTTCATTA	18	30	24	11	30	20	24	16	29	48	25	7	9	10	18	22	7	11	19	11	168	99	13	15	48	57	47	40	16	20	16	12	33	24	20	24	13	19	0	0
OTU_341	Arthropoda	Insecta	Odonata	Calopterygidae			93.14	Private	TTTATCAGGAAATATTGCTCATTCAGGTCCATCTGTTGATTTAGCTATTTTTAGTTTACATATTGCAGGAGCATCATCACTTTTAGGATCAATAAATTTTATTGTTACTATTTTAAATATGCGTGCACGTGGTATGACTATGTATATGTTACCATTATTTGGTTGAGCTGTTTTAATTACAGCATTTTTATTAGTTTTATCATTA	15	19	29	24	28	12	33	19	25	37	9	7	21	39	31	38	13	27	15	15	339	110	35	47	67	34	36	35	18	14	10	10	59	45	8	33	17	22	0	0
OTU_342	Annelida	Polychaeta	Terebellida	Ampharetidae	Hypania	Hypania invalida	100	Private	ATTAGCAAGAAATATCGCTCATAGGGGCCCATCAGTAGATTTTGCAATTTTTTCTTTACATCTAGCAGGAATTTCATCAATTTTAGGTGCTTTAAATTTTATTACCACTATTTCTAATATACGATTAAAAAAATACGAATTAGAAAATATTCCATTATTTGTCTGAGCTGTATTAATCACAGTAATTCTTTTATTACTATCTCTT	12	0	12	8	23	24	30	34	13	15	46	4	25	29	4	8	21	26	30	38	94	0	8	23	16	18	87	68	12	6	18	18	33	19	5	12	71	65	0	0
OTU_343	Echinodermata	Crinoidea					75.14	Published	ATTATCAAGTGCAACTGGTCATTATGGTGCTTCGGTAGAATTAGCTATATTTGCTTTGCATTTAGCCGGTTTATCTTCTTTAATTGGTTCAATTAATATGATAGTTACAATTTTAAATATGCGAGGTCCAGGTCTAACAATGCATCGTTTAAATCTTTTTGTTTGATCTATTTTAATCACGTCTATTCTTTTGCTATTGTCTTTA	34	27	16	26	32	29	49	22	22	35	25	10	18	22	27	29	18	28	25	19	222	325	46	50	70	54	51	52	25	20	25	34	16	45	12	12	17	20	0	0
OTU_344	Ascomycota	Leotiomycetes	Helotiales	Helotiales_incertae_sedis	Rhynchosporium		95.1	Published	TTTAAGTGGAGTACAAAGTCACAGTGGACCTAGTGTAGATTTAGCTATATTTGGATTACATCTATCAGGTATAAGTAGTTTATTAGGAGCTGTAAATTTCATTACTACTATATTAAATATGAGAAGTCCAGGTATCAGGTTACATAAATTAGCCTTATTCGGATGAGCTGTAGTTGTTACAGCTGTATTATTATTATTATCATTA	37	31	24	36	25	16	18	10	15	30	24	8	10	8	28	6	14	4	10	3	282	390	63	79	48	41	67	55	25	40	35	24	39	59	35	34	43	36	0	0
OTU_345	No Match	No Match	No Match	No Match	No Match	No Match			GCTTTCAGATAACATATCACATAATGGGCTGTCAGTTGATATGGCAATATTCAGTTTGCATTTAGCAGGGGCAGGCTCAATTGCAGGGGCTATAAATTTTATGACAACAGTTATTAATATGAGAGGTCGCGGCGTAACGATGGATAGGCTACCTTTATTCATTTGAACGGTGTTTGTTACCTCTATTCTTTTATTATTATCGTTG	79	94	8	0	102	77	202	116	26	151	60	19	12	3	0	0	3	3	0	0	0	0	21	40	3	0	48	77	21	13	4	15	85	59	86	130	151	151	0	0
OTU_346	Heterokontophyta	Oomycota					82.35	Private	TTTAGCAAGTGCTCAAGCACATTCAGGTCCTTCTGTAGATCTTGCAATTTTTAGTTTACATCTGGCTGGTATTGCTTCTATTTTAGGTGCTGTAAATTTTATTACAACAGTATGTAATATGAGAGCACCAGGTATGACTTTTCATCGTCTACCTTTATTTGTTTGGTCAGTTTTTATAACTGCTATTTTATTATTACTTTCTTTA	36	27	28	13	31	36	42	42	36	66	28	16	44	42	54	76	40	26	50	30	272	358	45	40	68	48	62	45	46	60	22	35	33	53	19	37	33	24	0	0
OTU_347	Ochrophyta	Phaeophyceae					78.84	Published	TCTAAGTAGTATTCAAGCGCATTCTGGACCATCTGTAGATCTGGCTATCTTCAGTCTACATCTATCCGGTGCATCATCTATTATGGGAGCGATTAACTTTATTGTTACAATTTTTAACATGCGAGCTCCTGGTCTATTTAGGCATAAACTACCTCTTTTTGTTTGAGCTGTTCTTATTACAGCTTTTCTACTACTACTATCACTT	49	17	24	24	61	12	36	24	15	9	20	8	14	7	12	11	18	15	12	17	291	511	11	44	45	26	51	20	41	27	6	18	35	28	8	12	18	19	0	0
OTU_348	Rotifera	Monogononta					72.51	Published	CCTCTCCGACTCTCTCTTCCACTCAGGAATCTCTGTTGATTTAGCTATTTTCAGCCTTCACTTAGCTGGAATCTCCTCCATCTTGGGTAGAATCAATTTCCTCACTACAATCCTCTTCTCCCGTCCTACCAAATGCTACTCTCTTGCCCGTATGCCTCTCTTCCTATGAGCAGTAGTCATCACCTCACTCTTACTAATCACCTCTCTC	0	0	0	0	329	212	1	0	0	0	0	0	256	269	0	0	1	0	0	0	0	0	0	0	0	0	0	0	0	0	0	1	0	0	0	0	10	13	0	0
OTU_349	Arthropoda	Insecta					74.24	Published	GTTGTCATCAGTAGAGGCGCATAGTGGTCCATCAGTGGATTTGGCGATCTTCTCATTGCACTTGGCAGGAGCCTCATCGATTTTGGGAGCAGTAAACTTTATTACAACAATTATGAATATGCGAGCACCAGGAAGAACAATGCACCGATTGCCATTGTTCTGTTGGGCAGTAAGAATTACAGCAGTATTGTTGTTGTTGTCATTG	13	9	19	17	23	15	33	12	17	17	29	7	20	6	27	18	44	24	16	28	83	15	40	22	62	27	46	42	11	6	24	10	10	11	7	16	10	12	0	0
OTU_350	Arthropoda	Insecta					83.72	Private	TCTAGCAAGTATAGGTTTCCATTCAGGAGGATCTGTAGATTTAGCTATATTTAGTTTACATTTAGCGGGTATATCATCAATATTAGGAACAGTAAATTTTATTACAACTATTTTTAATATGAGAGCTCCAGGAATGACTATGCATAGATTGCCATTATTCGTATGAGCAGTACTTATTACAGCATTTTTATTAATTTTATCACTT	0	0	0	0	0	0	0	0	0	0	0	0	0	0	0	0	0	0	0	0	0	0	0	0	0	0	0	0	0	0	0	0	0	0	0	0	0	0	0	0
OTU_351	Rotifera	Monogononta	Ploima	Proalidae			92.19	Published	CCTCTGATTCAAAGTACCATAGAGGTATTTCTGTAGACTTGGCAATTTTTAGTCTTCACTTAGCAGGTATTTCTTCTATTTTAGGTAGAATTAATTTCATAACTACAGTTCTATGTTCTCGAACAACAAAGCTCATTTCTTTAGATCGTATACCATTAATGTTATGGGCTCTGTCTATTACGGCTCTTCTCCTCGTAACTAGTTTA	42	32	0	0	1476	1480	177	0	85	166	0	34	782	942	507	537	1602	1608	524	477	0	0	0	0	0	0	198	155	317	265	408	332	865	777	333	315	701	621	0	0
OTU_352	Ochrophyta	Phaeophyceae					78.61	Published	ACTAAGTAGTATCCAAGCACATTCAGGGCCTTCAGTAGACCTAGCAATATTTAGTCTACACCTTTCAGGAGCTTCTTCTATTAGGGGTGCTATAAATTTTATCGTAACTATATTTAATATGCGTGCTCCAGGACTATTTATGCATAAACTACCTCTATTTGTATGAGCTGTTCTAATTACAGCTTTCCTACTACTTCTATCTCTA	12	20	6	8	13	17	12	10	6	26	22	14	17	13	3	7	10	8	1	3	113	76	14	11	50	26	18	9	7	9	9	7	14	3	6	10	5	9	0	0
OTU_353	Arthropoda	Insecta					76.15	Published	ATTATCAGGTATAATTGCACATTCAGGTGGTAGTGTTGATTTAGCTATTTTTAGTTTACATCTTGCAGGTGCTTCTTCAATAGCAGGATCTATAAATTTTATGACTACAATTATAAATATGCGTGTTGAATCTTTAACTTGATATCGTTTACCATTATTTATATGATCATTATTTTTAGCTTCATTTTTATTAGTTTTAACTTTA	31	28	4	5	1	12	21	16	25	12	40	6	9	17	14	29	40	28	9	10	494	382	24	24	10	9	31	33	4	6	13	6	2	21	15	11	37	27	0	0
OTU_354	Arthropoda	Insecta	Lepidoptera				86.52	Published	GCTATCTGGAAATGAAGCTCATTCTGGTGCCGCAGTCGACTTAGCTATTTTTAGTTTGCATTTGGCTGGTATTTCTTCAATTGCGGGAGCAATTAATTTTATTACAACTATTATTAATATGCAATTTCGCGGAGGTGCACTTTATCGAATGCCTTTATTTTGCTGAGCAGTTTTAATAACTGCAGTTTTGCTTTTACTTTCCTTA	15	28	14	27	24	23	25	41	26	30	17	11	14	15	19	19	23	31	17	18	412	272	33	17	37	12	36	41	30	15	28	14	50	35	17	47	27	25	0	0
OTU_355	Bacillariophyta	Mediophyceae	Thalassiosirales				88.73	Published	GTTGTCCAGTGCAACAGCTCACTCTGGCGGTTCTGTAGATTTAGCTATTTTTAGTTTACATTTATCTGGTATGTCTTCTATTTTAGGTGCTATTAATTTTATTTGTACAATTTTTAATATGCGAGTAAAAAGTTTATCTTTTCATAATTTACCATTATTTGTATGAGCTGTTTTAATTACTGCGTTTTTGTTATTATTATCTTTA	364	385	277	341	259	261	296	315	206	370	260	328	244	297	276	352	277	444	348	273	249	246	417	359	444	493	384	340	256	363	273	301	316	291	276	301	230	456	0	0
OTU_356	Cnidaria	Hydrozoa					81.09	Published	ACTTGCAGGTATTGAAGCTCATTCAGGTGGATCTGTAGATTTGGCTATTTTTAGTTTACATTTAGCAGGTGCTTCTTCAATATTAGGAGCTATGAATTTTATTACTACGGTATTAAACATGAGAACTCCTGGTTTAAAGATGCATAGAATACCTTTATTCGTATGAGCTGTATTTATTACAGCAATATTATTGTTATTATCTTTA	10	21	10	15	28	24	20	13	26	31	17	12	25	22	21	41	29	6	24	19	77	127	24	7	39	17	32	19	16	19	14	17	14	30	13	24	9	16	0	0
OTU_357	Ascomycota	Dothideomycetes	Pleosporales				89.55	Published	ATTATCAGGAATACAAAGTCATAGTGGTCCAAGTGTGGATTTAGCTATCTTTGGGTTACACCTTTCGGGTATCTCAAGTTTACTTGGAGCTATGAATTTCATGACTACTACATTTAATATGAGAAGTCCTGGTATAAGATTACATAAATTAATACTATTTGCATGAGCAGTTGTTATTACAGCTGTATTATTATTATTATCACTA	21	10	12	20	17	26	39	5	12	24	13	8	10	9	14	20	17	16	22	21	139	173	21	21	36	28	39	25	12	30	21	11	21	18	18	19	36	24	0	0
OTU_358	Heterokontophyta	Oomycota	Pythiales	Pythiaceae			90.69	Published	ATTATCGAGCGTGCAAGCACATTCAGGACCTTCAGTTGATTTAGCTATTTTTAGTTTACATTTAGCGGGTATTTCATCTTTATTAGGTGCTATTAATTTTTTATCAACTATTTATAATATGCGTGCCCCTGGATATAGTTTCCACAGATTACCTTTATTTGTTTGGGCTGTATTTATAACAGCTTTTTTACTATTATTAACATTA	24	20	26	29	10	28	18	24	12	30	16	3	7	12	9	20	10	13	4	3	363	211	82	63	98	66	66	38	21	34	13	11	16	20	17	31	13	16	0	0
OTU_359	Ochrophyta	Phaeophyceae					75.66	Published	ACTAAGTAGCATCCAAGCGCACTCTGGACCGTCTGTAGATCTAGCTATTTTTAGTCTACACCTTTCTGGTGCTTCATCTATTAGGGGTGCTATTAACTTCATCGTTACAATTTTTAACAGGCGAGCACCTGGTCTATTTAGGCACAAAATTCCACTTTTTGTATGAGCTGTTCTAATTACAGCTTTCCTACTACTCCTATCACTC	16	30	8	21	31	3	20	8	15	23	22	7	10	10	18	15	15	15	3	6	194	138	27	18	52	23	18	19	25	13	10	15	23	20	14	14	9	19	0	0
OTU_360	Bacillariophyta	Bacillariophyceae	Naviculales				86.45	Published	ATTGTCAGGAATAACAGCTCATTCTGGTGGTTCAGTTGATTTAGCAATTTTTAGTTTGCATCTTTCAGGTGCTGCTTCTATTTTGGGAGCGATAAACTTTATTTGTACTATTACTAATATGAGATCCAGTAGTTTATCATTTCATAGAATGCCGTTATTTGTTTGGGCGATTTTTATAACAGCTTTTTTGTTGCTTTTATCTCTT	19	17	26	16	41	26	70	24	26	16	15	17	92	42	44	40	91	29	63	27	130	0	28	3	31	0	8	24	5	5	21	20	32	61	13	25	44	22	0	0
OTU_361	Ochrophyta	Phaeophyceae					73.6	Published	TCTCAGCGCTATTCAAGCGCACTCCGGTCCATCTGTTGACCTTGCGATCTTCTCTCTTCACCTTTCAGGTGCTGGTTCGATCCTTGGTGCGATTAACTTTATCGTTACTATCTTTAATAGACGCGCCCCTGGTCTTTTCAGACATAAGCTTCCTCTTTTTGTTTGGTCTGTTCTGATTACTGCATTCCTTCTTCTCCTTTCTCTC	49	35	33	24	42	31	37	34	28	41	26	14	21	38	30	36	21	25	21	11	112	154	43	26	63	51	80	43	45	39	23	30	46	31	24	15	24	36	0	0
OTU_362	Bacillariophyta	Bacillariophyceae	Naviculales				85.78	Published	ATTATCCAGTATTACAGGTCACTCAGGAGGTGCTGTAGACTTAGCTATATTCAGTTTGCATTTATCTGGGGCAGCTTCAATATTAGGTGCTATTAATTTTATTTGTACTATTACAAATATGCGATCGAAAAGTTTACCATTTCATAGACTGCCTTTATTCGTTTGGTCGATATTTATTACTGCCTTTTTACTTCTGTTATCATTA	27	27	27	15	28	22	25	25	41	39	42	7	26	50	49	47	27	32	10	22	74	71	33	24	45	18	54	28	32	27	25	47	31	44	26	22	33	15	0	0
OTU_363	Arthropoda	Insecta					78.65	Private	ACTAAGTGGTGCTATTGCCCATGCTGGACCATCTGTTGATTTTGCTATCTTTAGCTTACACATAGCTGGAGCATCATCAATTATGGGTGCCATTAATTTTATTACCACAATTGTTAACATAAGAGCAGTCAAATTTCATGAGTTAAATTTATTTGTTTGAAGTGTTTTAATTACCGCTGTCTTATTATTATTATCATTA	35	26	15	13	6	13	32	22	23	28	22	17	22	12	37	36	18	18	31	27	190	392	52	31	46	26	36	46	31	14	21	25	47	33	17	26	27	30	0	0
OTU_364	Arthropoda	Insecta					78.52	Private	ACTATCTAGCATCGGATTCCACTCAGGAGGTTCTGTTGATTTAGCTATATTTAGCTTACACTTAGCTGGTATATCTTCTATTTTAGGTACAGTTAACTTTATTACAACTATATTTAACATGAGAGCACCAGGTATGTCAATGCACAGATTACCTTTATTTGTATGAGCCGTTTTAATTACAGCCTTTTTATTAATATTATCACTT	15	6	5	9	5	15	6	6	6	12	11	2	9	3	8	9	6	11	10	3	32	21	21	31	29	23	24	12	12	7	5	6	19	19	3	4	3	12	0	0
OTU_365	Arthropoda	Collembola					81.82	Published	TTTATCATCTAACATTTCTCATGCTGGGGCTTCAGTCGACCTAGCAATTTTTAGTCTTCATCTCGCGGGGGCAAGGTCAATCTTGGGGGCTATTAATTTTATCACGACTATTATTAATATACGAGCCCCAGGAATAAACTGAGACCGGACTCCTTTATTTGTGTGATCAGTCTTTCTAACAGCTATTTTGCTACTTTTATCCTTA	1	0	0	0	0	0	0	0	0	0	0	0	0	0	0	5	0	0	0	0	57	72	3	0	11	8	739	645	0	0	0	0	0	1	0	0	2	3	0	0
OTU_366	Arthropoda	Collembola	Symphypleona	Bourletiellidae	Deuterosminthurus	Deuterosminthurus sp1	100	Published	TCTTTCTACTACTTTATCTCACTCAGGAGGATCTGTTGATTTATCAATTTTTAGTTTACACTTAGCAGGAGTTTCATCAATCTTAGGGGCCATTAACTTTATTACAACTATTATTAATATACGTTCCCCTGGTATAACTTGAGACCAAACACCACTATTCGTTTGATCAGTATTCTTAACAGCAATTTTATTATTATTATCTTTA	0	0	8	5	0	1	0	0	0	0	2	0	0	0	0	0	0	0	0	0	26	74	19	7	3	0	2	1	1	0	0	1	0	0	105	92	0	0	0	0
OTU_367	Bacillariophyta	Bacillariophyceae	Bacillariales				87.25	Published	GTTATCTGGTATTATTGCACACTCTGGTGGTGCTGTTGATCTTGCAATTTTCAGTTTACATTTGTCTGGTGCAGCGTCTATTTTAGGAGCAATTAATTTTATTTGTACTATTGTCAATATGCGAACTGAAAGTTTGCCGTTCCACAAATTACCATTATTTGTTTGGGCGGTTTTCATTACTGCAATTTTATTATTACTATCTTTA	19	20	21	22	30	14	28	16	23	46	22	12	9	35	23	41	19	31	38	15	82	100	40	58	57	40	24	37	12	23	17	32	49	43	17	15	31	24	0	0
OTU_368	Arthropoda	Insecta					78.57	Published	TTTATCTGATACACCTTATCAAATTGGTGGTACTGTAGATTTAGCTATATTTAGTTTACATTTAGCTGGTATTTCTTCTTTATTAGGTGCTATTAATTTAATTAGTACTATTATGAATATGCGTTGTTTTAAATCTTTAACTTCTTTACCTTTATTTGTATGGAGTGTTTTATTAACTGCATGGTTATTAGTAATTTCTTTA	36	33	51	44	34	18	54	47	18	52	62	18	29	36	38	50	32	28	37	37	129	107	60	33	71	64	41	36	42	46	25	19	49	33	19	30	39	34	0	0
OTU_369	Ascomycota	Sordariomycetes	Hypocreales				85.78	Private	ATTATCAGGATTACAAAGTCATAGTGGACCTAGTGTTGATTTAGCTATATTCGCTTTACACCTATCAGGGATAAGTAGTCTATTAGGAGCTATTAACTTTATAACGACGATCCTAAACATGAGAAGTCCAGGAATCAGATTACACAAATTGGCTTTATTTGGTTGAGCTGTTGTTATTACAGCAGTGTTATTACTATTATCTTTA	15	9	8	20	10	24	15	17	15	17	11	13	0	5	7	6	5	4	7	10	311	217	162	141	25	25	77	65	66	70	53	23	48	58	15	26	27	14	0	0
OTU_370	Rotifera	Monogononta					80.1	Published	TCTTTCTGATTCTAAGTATCACAGAGGGATTTCTGTTGACTTAGCTATTTTTAGTCTCCATATTGCTGGTGTTTCCTCAATTCTTGGTAGAATCAATTTTTTAAGTACTGTCTTGTGTTCACGTAACAGAAATTCTTTTTCTCTTGATCGAATGCCCCTTATACTATGGGCTCTTAGCGTTACTGCTGTTCTTCTAGTTACAAGCCTT	2	0	0	0	350	337	0	0	0	0	0	0	0	0	0	0	0	0	0	0	0	0	0	0	0	2	0	0	0	3	0	0	111	118	2	0	20	1	0	0
OTU_371	Arthropoda	Insecta	Lepidoptera				85.39	Private	TTTAAGTAGTCTTGTAAGTCATTCTTCTGCAGCTGTAGATTTAGCCATTTTTAGTTTACACTTATCTGGTATTTCTTCAATTTTAGGTGCTATAAATTTTATAACAACTATTTTTAATATGAGAAGTCCTGGTTTATCAATGCATCATTTACCTTTATTCGTTTGATCAGTTTTAATCACTGCTTTTTTATTACTTTTATCTTTA	4	6	2	6	12	14	18	8	9	20	17	4	5	4	9	4	2	9	8	3	20	81	6	9	32	18	13	4	8	7	6	8	7	0	10	3	11	7	0	0
OTU_372	Ochrophyta	Raphidophyceae					82.91	Published	TTTAAGTAGTATTTTAGCGCATTCAGGACCTGCTGTTGATTTAGCTATTTTTAGTTTACATTTATCGGGAGCCGCTTCAATTCTAGGAGCAATTAATTTTATTACTACCGTTTTTAATATGCGTGCACCTGGTTTACATTTCCATAGATTATCCTTATTAGTTTGGGCTTTATTAATTACTTCATTTTTGTTATTACTTTCATTG	7	16	10	5	12	10	26	19	6	23	9	2	5	3	10	6	18	5	3	2	87	69	32	20	35	14	15	8	17	18	6	2	10	16	2	11	6	11	0	0
OTU_373	Arthropoda	Insecta	Diptera	Chironomidae	Cladotanytarsus	Cladotanytarsus mancus	100	Published	TTTATCTTCAAATATTGCTCATAGAGGAGCTTCTGTTGATTTAGCCATTTTTTCCCTCCACCTGGCAGGAATCTCATCTATTTTAGGATCAGTAAATTTTATTACAACAGCAATTAATATACGAAGAAACGGAATTACCTTAGATCGAATACCTTTATTTGTTTGATCTGTTGTAATTACTACTATTCTTCTCTTACTATCTCTC	39	40	30	16	51	3	24	7	5	7	5	7	4	12	1	3	10	12	1	7	628	297	66	44	28	20	86	52	77	44	8	13	26	24	31	19	18	17	0	0
OTU_374	Proteobacteria	Alphaproteobacteria					77.33	Private	CTTAAGTAATTTATCAGGTCATCCTGGAGCGGCTGTTGATATGGCCATATTTAGCCTGCACCTTGCAGGTATGTCATCTATTTTAGGGGCAATCAATATGATTGTAACTATATTCAACATGCGTGCTCCTGGAATGGGAATGTTTAAATTACCTTTATTTGTCTGGTCTATACTTATTACTGCATTTCTGCTTATACTAGCTTTG	27	53	50	35	34	36	120	49	53	101	57	13	26	45	37	40	40	54	33	36	71	83	47	25	73	44	84	64	34	34	36	36	76	66	31	42	28	52	0	0
OTU_375	Rotifera	Monogononta	Ploima	Synchaetidae	Synchaeta		97.91	Published	ATTATCTGATTCTAAATTTCATTCTGGTATTTGTTGATTTAGCTATTTTCAGTTTACATTTAGCTGGTATTTCTTCTATTTTAGGTAGTATTAATTTTATAACTACTATTATTTGTTCTCGTACAAAAGATAATTAGTATAGATCGTTTACCACTAATGTTATGATCATTAGGTGTTACTGCCTTTTTATTACTAACTACTTTG	33	21	49	35	108	114	39	32	23	47	34	21	61	96	14	28	93	68	74	59	254	367	16	5	0	0	13	7	41	30	50	79	135	121	69	82	48	56	0	0
OTU_376	Bacillariophyta	Mediophyceae	Thalassiosirales				89.71	Published	TTTATCTAGTGCAACTGCACATTCTGGTGGATCTGTAGATTTAGCAATTTTCAGTTTACACGTATCAGGTACTTCTTCTATATTAGGAGCAATTAATTTTATTTGTACCATTTTTAATATGAGAGTAAAAAGTTTATCTTTTCATAATCTTCCTTTATTTGTATGGTCTGTGTTAATAACTGCATTTTTATTATTATTATCATTA	20	19	8	14	6	8	11	3	11	14	10	10	6	7	9	2	15	14	4	9	17	44	15	23	12	25	15	16	16	8	3	7	13	8	10	12	18	9	0	0
OTU_377	Ascomycota	Dothideomycetes	Pleosporales				93.63	Published	ATTATCAGGTATACAAAGTCATAGTGGTCCAAGTGTTGATTTAGCCATATTTGGGTTACACCTTTCTGGTGTATCTAGTTTACTTGGAGCCATGAATTTCATGACTACTACATTTAATATGAGAAGTCCTGGAATAAGATTACATAAATTAATTTTATTTGCATGAGCTGTTGTTATTACAGCTGTTTTATTATTATTATCATTA	16	30	20	21	18	10	9	1	9	9	12	3	5	1	1	1	7	0	0	0	246	122	54	27	43	16	77	100	40	26	24	26	44	37	32	41	32	20	0	0
OTU_378	Arthropoda	Insecta	Lepidoptera				85.39	Private	GTTATCAAGTATTCAAGCACACTCAGGTGCTTCAGTTGATTTAGCAATTTTTAGTTTACATTTAGCAGGTATCTCATCTATACTTGGTGCTGTTAACTTTATTACAACAATTTTAAATATGAGACCTGAAAAAATGAGTATGCACTTATTACCATTATTCGTCTGGGCAGTTTTAATTACAGCAGTTTTATTATTATTATCTTTA	17	12	7	21	42	27	20	15	14	32	17	7	23	25	16	14	21	9	18	5	91	89	34	49	50	48	37	33	20	30	7	20	16	20	21	20	15	18	0	0
OTU_379	Ochrophyta	Phaeophyceae					74.36	Published	TCTAAGCGCAATCCAAGCGCACTCTGGACCATCAGTCGACCTAGCGATTTTTTCTCTTCACCTTTCTGGTGCTGCGTCTATTCTTGGTGCAATCAACTTTATCGTTACAATTTTCAACAGACGTGCCCCTGGTCTGTTTAGACACAAGCTCCCTCTTTTCGTTTGGTCTGTTCTAATTACAGCATTTCTACTTCTTCTTTCACTC	29	29	29	34	25	32	42	31	11	37	34	14	14	21	15	23	23	37	17	20	200	239	50	73	80	52	63	50	51	46	15	11	47	29	22	25	12	15	0	0
OTU_380	Arthropoda	Insecta					75.13	Published	ACTAAGTAGTATTCAAGCACATTCTGGACCAGCTGTAGATCTAGCTATTTTTAGCCTACATCTTTCAGGTGCATCATCTATTATGGGAGCTATTAATTTTATTGTAACTGTATTTAATATACGTAGTGTAGGTAGATTTATACATAAAATTAATCTATATGTATGAGCTGTACTAATTACAGCATTTCTACTTCTACTTTCACTT	21	8	8	11	17	6	12	5	6	19	9	4	5	11	4	19	12	17	6	4	28	147	19	26	17	25	18	19	17	11	6	2	14	20	12	8	24	18	0	0
OTU_381	Ascomycota	Leotiomycetes					82.67	Published	ATTATCAGGTATACAAAGTCACAGTGGACCTAGTGTAGACTTAGCAATCTTCGCTCTTCACTTATCAGGGATAAGTAGTCTATTAGGAGCAATGAATTTTATAACAACAATACTAAATATGAGAAGTCCAGGAATAAGATTACATAAATTGGCTTTATTTGGTTGAGCAGTAGTGGTTACAGCAGTATTATTACTTTTATCTTTA	35	15	45	46	15	25	28	17	10	71	20	8	2	2	8	4	1	0	4	2	151	237	102	56	20	37	53	73	19	22	12	14	48	34	60	72	36	64	0	0
OTU_382	Ochrophyta	Phaeophyceae					77.78	Published	ATTATCAGGAATTCAAGCTCACTCAGGGCCTTCTGTAGATTTAGCTATTTTCAGCTTACATTTATCAGGAGCAAGTTCTATTATGGGATCTATTAACTTTATTGTTACAATTTTTAATATGAGAGCACCAGGTATGTTTATGTATAAAATGCCACTTTTTGCATGAGCACTTCTTCTTACAGCTTTCTTATTATTACTTTCTCTT	4	1	2	6	9	3	9	6	4	6	9	2	5	1	6	9	14	7	4	3	60	74	15	11	24	10	24	5	7	14	5	9	20	9	2	3	6	9	0	0
OTU_383	Arthropoda	Insecta					72.68	Private	TCTATCTGACTCAAAATTTCACACAGGAATTTCTGTTGACTTAGCAATTTTTAGTTTACATCTAGCAGGAGTCTCCTCCATCCTTGGTAGGATTAACTTCTTAACTACTATTATAGTGTCTCGTATGTCCTCTTCTCTAACTTTAGCGCGCATGCCTCTTTTTCTTTGATCTGTCGCTATTACAGCAGTGTTATTAATTATTAGTTTA	1	0	79	98	0	0	6	0	0	0	0	0	0	0	0	0	0	0	65	79	0	0	0	0	1	0	167	156	216	178	0	1	60	79	27	15	5	0	0	0
OTU_384	Chordata	Actinopterygii					72.13	Private	TCTGTCAGGTATTCAAGCCCACTCAGGACCATCAGTGGATCTAGCGATCTTTTCGCTTCACCTTTCTGGTGCTGCGTCAATCCTAGGTGCTATCAACTTCATTGTTACAATCTTTAACAGACGTGCACCTGGAAGGTTTAGGCACAAGCTACCTCTTTTCGTTTGGTCTATTCTAATCACAGCTGTACTTCTTCTGCTTTCACTT	30	21	19	18	16	17	31	15	16	37	26	14	13	16	15	39	20	18	12	9	270	216	44	46	40	36	45	24	23	17	28	9	22	15	22	22	14	24	0	0
OTU_385	Ochrophyta	Raphidophyceae					82.91	Published	TTTAAGTAGTATACAAGCACATTCTGGACCATCTGTTGATTTAGCGATTTTTAGTTTACACTTATCAGGAATTGCTTCTATTTTAGGGTCAGTTAACTTTATTACAACTATTTTTAACATGCGTGCACCAGGTTTAAGTTTACATCGCTTACCTTTATACGTTTGGGCTGTTTTAATTACCTCATTCTTATTATTATTATCTTTA	6	3	3	4	5	9	7	6	6	12	2	1	8	4	7	5	1	2	2	1	45	63	10	9	10	20	13	15	3	5	4	8	7	7	4	5	2	8	0	0
OTU_386	Rotifera	Monogononta					80.23	Published	TCTTTCTGACTCTAAGTACCACAGGGGAATCTCTGTCGATTTAGCTATTTTTAGGCTACATTTAGCAGGAATCTCGTCTATTTTAGGAAGAATTAACTTTCTTACAACTATTCTAGTTTCTCGTATAGATTCACTAATGAGACTTTCCCGTCTCCCACTATTTTTATGATCAGTTGCAATTACGGCAGTTTTACTTATTGTTAGACTC	61	54	45	53	0	0	0	143	0	0	188	0	0	0	0	0	0	0	0	0	0	0	0	0	0	0	100	83	50	42	0	0	0	0	42	45	60	45	0	0
OTU_387	Basidiomycota						92.54	Private	ATTAGCAGGTATCCAATCTCACTCAGGGGGATCTGTAGATTTAGCTATCTTCAGTCTTCACTTAGCGGGAATCTCATCAATGTTAGGGGCAATGAACTTCATTACTACAATCCTTAACATGCGAAACCCAGGTATGACATTACACAAATTACCACTATTCTGTTGAGCTATCATGGTAACAGCTATCTTATTACTATTATCATTA	14	15	23	6	22	21	19	24	10	11	8	0	9	0	13	16	3	3	4	4	109	69	63	26	38	12	31	34	13	16	4	12	12	7	26	23	16	11	0	0
OTU_388	Rhodophyta	Florideophyceae					77.45	Published	TTTAAGCACTACTTTGTGTCACCCAGGTCCTTCAGTTGACTTAGCAATTTTTAGTTTACATTTATCGGGAGCTGCTTCTATATTAGGTGCAATTAACTTTATAACTACTGTTATTAATATGCGATTGCCAGGCATGACAATGTATCGTTTACCATTGTATGTTTGAGCTTTATTTATTACTTCTTTTTTATTATTACTTTCTCTT	5	1	5	8	13	5	2	9	3	13	4	8	7	3	5	3	2	9	2	5	144	115	7	12	8	16	12	8	7	9	1	2	11	8	2	9	4	4	0	0
OTU_389	Arthropoda	Arachnida					83.61	Published	TCTTTCTTCACACGCATTTCATAATAACACATCAGTAGACTTAACAATCTTCTCCCTGCACTTAGCAGGAATCTCATCAATTTTAGGGGCTATTAACTTCATCACCACAATTTTGAATATACGGCCACAAATAATATATTTCGAACGAATTCCACTTTTTTTGTGATCAATCATAATCACAACAGTATTATTATTATTATCCCTC	6	3	378	374	2	12	1	1	7	5	4	0	0	8	1	2	0	0	0	0	0	0	0	0	0	0	6	5	0	3	0	0	0	7	7	18	5	3	0	0
OTU_390	Arthropoda	Insecta					80.88	Published	TCTTTCAAGTATAGAATATCACTCAGGTGGTTCTGTAGATTTAGCAATCTTTAGTTTACATTTAGCTGGTATTAGTTCTATTTTAGGGGCTTCTAATTTTATTACAACTATCTTAAATATGAGAGCACCTGGTATGACTATGCATAGATTACCTTTATTTGTTTGAGCAGTATTTATTACAGCTATATTATTATTACTTTCTTTA	13	17	13	5	8	10	21	11	18	21	20	0	4	7	10	14	14	12	9	5	150	97	26	37	20	25	14	22	9	10	8	18	17	16	4	8	10	7	0	0
OTU_391	Arthropoda	Insecta	Lepidoptera				87.64	Published	TTTAAGTAGTATTTTAAGCCATTCTTCTGCTGCTGTTGATTTAGCTATTTTTAGTTTACATTTAGCTGGTATTTCTTCTATTCTTGGGGCTATTAATTTTATTACAACTATTTTTAATATGCGTAGCCCTGGTTTAGGTATGCATCAATTACCTCTTTTTGTTTGATCTGTTTTAATAACTGCTTTTTTATTAGTTTTATCCTTA	2	5	0	1	2	0	1	0	1	6	1	0	4	2	1	1	3	0	2	2	6	31	5	3	4	3	2	9	0	0	2	7	0	3	0	2	0	1	0	0
OTU_392	Cnidaria	Scyphozoa					79.41	Published	ACTTTCAAGTGTACAAGCACATTCAGGACCATCTGTAGATTTTGCAATTTTTAGTTTACATTTATCAGGGGCAAGTTCTATTATGGGATCCATTAATTTTATTGTTACAATTATAAATATGAGAGCTCCAGGTATTTTTATGCATAAAATGCCATTATTTGCATGATCTATGTTTATTACATCATTTTTATTACTATTATCATTA	9	18	19	18	7	18	17	9	14	22	13	8	2	6	9	12	18	9	6	4	81	124	21	14	41	14	17	20	12	13	10	5	25	12	16	4	16	10	0	0
OTU_393	Arthropoda	Insecta					77.53	Private	TTTAAGTAGTATTGTTGGTCACCCTGGTGCAAATGTAGATTGTGCAATTTTCAGTTTACATATTGCGGGTATTTCAAGTATTTTAGGTGCTATCAATTTTATCACTACAATTGTTAACATGCGAGCACCTGGTATGTTTTGGCATCGTTTACCACTTTTTGTGTGGTCTATTTTCATTACAGCAATTTTATTACTTTTATCATTA	11	15	19	24	16	11	18	18	13	26	11	10	11	17	23	23	21	24	9	13	75	175	31	28	36	18	22	33	23	16	7	7	22	24	9	24	11	16	0	0
OTU_394	Arthropoda	Insecta	Lepidoptera				85.39	Private	TTTAAGTAGTACTTTATGTCATCCAGGTCCTTCAGTAGACTTAGCAATTTTTAGTTTACATTTATCTGGGGCTGCCTCGATTTTAGGTGCAATTAATTTTATTACAACTGTTATTAATATGCGATTACCTGGAATGACAATGTATCGTCTACCTTTATATGTTTGAGCCTCTTTTATTACTTCTTTTTTATTATTACTTTCGTTA	12	11	10	6	9	12	19	7	17	16	21	1	8	12	15	22	8	11	10	3	27	111	13	11	9	5	15	9	5	19	20	22	9	6	7	6	3	7	0	0
OTU_395	Bacillariophyta	Mediophyceae	Thalassiosirales	Skeletonemataceae	Skeletonema		95.1	Published	TTTATCAAGTGCAACAGCTCACTCTGGAGGTTCTGTAGATTTAGCTATTTTTAGTTTACATTTATCTGGTGCGTCTTCTATTTTAGGTGCTATTAATTTTATTTGTACAATTTTTAATATGCGAGTAAAAAGTCTATCTTTTCATAATCTTCCTCTATTCGTATGATCTGTTTTAATAACAGCGTTTTTACTGTTATTATCTTTG	314	316	264	308	224	292	221	246	190	273	235	198	217	250	190	237	272	322	226	201	92	107	301	308	410	430	341	293	317	376	178	247	290	305	205	317	200	319	0	0
OTU_396	Heterokontophyta	Oomycota					82.59	Published	TCTATCAAGTATAGAATACCATTCTGGAGGTTCTGTAGATTTAGCTATTTTTAGTTTACATTTAGCAGGTATTAGTTCTATTTTAGGTGCTTCAAATTTTATTACAACTATTTTAAATATGAGAGCTCCTGGTATGACTATGCATAGATTACCTTTATTTGTATGAGCAGTATTTATCACAGCAATTTTATTATTATTATCTTTA	18	14	15	22	20	28	31	24	32	13	25	6	16	14	32	21	22	30	22	19	103	63	39	30	56	32	28	29	10	25	6	12	22	33	9	16	17	22	0	0
OTU_397	Heterokontophyta	Oomycota	Pythiales	Pythiaceae			90.2	Published	ATTATCAAGTGTTCAAGCACATTCAGGTCCATCTGTTGATTTAGCAATTTTCAGTTTACATTTAGCAGGGATTTCTTCTTTATTAGGAGCAATAAATTTTTTATCTACAATATATAATATGCGTGCACCTGGAATGAGTTTTCATCGATTACCTTTATTTGTATGGTCTATTTTTATTACGGCTTTTTTATTATTATTAACATTA	18	19	19	32	39	30	28	16	18	15	32	6	23	27	22	33	32	24	16	15	211	223	71	58	65	77	67	61	27	34	21	37	21	19	20	22	28	36	0	0
OTU_398	Cryptophyta	Cryptophyceae	Cryptomonadales				87.88	Published	ACTTAGTAGTATTTCTGGTCATCCAGGAGGCGCAGTTGATTTAGGTATATTTAGTTTACACGTAGCTGGTGCTTCTAGTATTCTGGGCGCTATTAATTTTATAACTACCATCTTCAATATGAGAGTTCCTGGGATGACAATGCATAGAATACCTCTTTTTGTGTGGGCTGTTTTAATAACTGCTTTTTTACTTCTCCTATCACTA	24	16	21	17	22	16	11	6	16	9	16	4	11	10	13	21	9	10	11	6	65	138	21	27	41	30	30	16	28	24	9	1	21	29	14	8	20	12	0	0
OTU_399	Ochrophyta	Phaeophyceae					78.11	Published	TTTAAGTAGTATTCAAAGCCACTCTTCGGCTGCAGTTGATTTGGCTATATTTAGTTTACACTTAGCTGGTATATCTTCAATCCTTGGAGCTATTAACTTTATAACAACTATTTTTAATATGCGTTCGCCTGGATTAGGTATGCATCAACTACCTCTTTTTGTTTGGTCTGTGTTAATAACAGCTTTTCTATTACTTTTATCTCTA	0	0	0	0	0	0	0	0	0	0	0	0	0	1	0	0	0	0	1	0	0	0	0	0	0	0	0	0	0	0	0	0	0	1	0	0	0	0	0	0
OTU_400	Rotifera	Monogononta					84.38	Private	TCTATCAGACTCTAAGTTTCATACAGGTATTTCAGTTGATTTAGCCATTTTTAGGCTTCATCTAGCAGGTGTTTCATCAATTTTGGGAAGAATTAACTTTTTAACAACTATTATTTGTTCTCGTACTACTAAAATAATTTCAATGGATCGTCTTCCTTTGATAATTTGAGCGTTAGCTGTTACTGCACTTCTTTTAGTAACTAGTTTA	0	0	0	0	0	0	450	0	0	475	0	0	0	0	0	0	0	0	0	0	0	0	0	0	0	0	0	0	0	0	0	0	0	0	0	0	0	0	0	0
OTU_401	Cnidaria	Hydrozoa					75.62	Private	ATTAAGCGGTAATATAGCTCACTCCGGAGGTGCTGTAGATTTAAGTATTTTTAGTTTACACATTGCTGGGGTTTCTTCTATAGCGGGAGCTTTAAATTTTATTACAACTTTATTTAATATGAAATCTAAAGGTTTACTTTTTAGCAGACTAGGCTTATACCCTTGATCTGTTTTAATAACTGCTTTTTTATTATTATTATCTTTA	26	14	14	15	16	36	26	29	24	24	19	23	22	23	25	25	28	14	16	17	98	59	33	29	67	49	33	27	20	19	7	13	19	29	20	22	17	8	0	0
OTU_402	Ochrophyta	Phaeophyceae					75.76	Early-Release	TCTTTCTGGTATTCAAGCTCATTCTGGTGGTTCTGTAGATTTAGCAATTTTCAGTTTACATCTTGCCGGCGTTTCGTCAATTTTAGGTGCTATCAATTTCATTGTTACCATAATGAATATGCGTGCTCCTGGTATGGCGGCTCACCGTGTACCTTTATTCGTGTGATCTGTCTTCATTACAGCGTTTTTACTTCTTCTTTCTTTA	26	9	8	13	30	8	29	10	17	14	6	9	11	16	19	7	16	22	13	7	55	149	14	9	15	12	25	21	14	43	14	12	33	32	31	14	12	24	0	0
OTU_403	Arthropoda	Arachnida					77.61	Published	TCTATCTAATCAAATGTTCCATAGCACACCCGCTATTGACATAACCATTTTTTCTCTTCATTTAGCAGGGGCTTCTTCCATCTTAGGTGCAATCAATTTCATTACCACCATCTTGAACATACGCCCTATTAGCATAAAATTTGAAAGAGTACCCTTATTTGTTTGATCTGTATTTATTACAGCCATCCTATTACTCCTATCTCTT	0	0	0	0	505	383	1	0	0	0	0	0	0	0	0	0	0	0	0	0	0	0	0	0	0	0	0	0	0	0	0	0	8	12	0	0	0	3	0	0
OTU_404	Arthropoda	Insecta					75	Private	TTTAAGTTCTTTATTATCACATTCTGGATATTCTGTTGATTTTGCAATTTTTAGTCTTCATTTAGCTGGTGTTTCTTCAATTGCTGGTGCAATAAATTTTTTAGTTACAATTTATAACATGCGTTGTAATGGGTTATATTTTACAATTATGCCTTTATTTGTATGGACAGTTTTTGTAACAGCAATATTATTACTACTATCTTTA	49	29	25	78	19	24	20	32	12	42	33	9	5	2	20	10	10	2	5	16	36	163	4	11	1	16	24	19	24	10	7	4	30	26	16	18	23	24	0	0
OTU_405	Heterokontophyta	Oomycota					76.96	Published	ATTAAGTGGAATTGATGCACATTCTGGTCCAGCAGTGGATCTTGCAATCTTTAGTTTACATTTATCAGGAGCCTCTTCTATTGCAGGTGCTATTAATTTCATCGTGACGATTATGAATATGAGAGCACGTGGTTTAGAGTTTTATAGATTACCATTATTTGTATGATCTGTTTTTATTACTGCAATTTTATTATTATTATCTTTA	45	24	54	40	21	25	32	9	26	35	31	16	6	16	31	15	19	15	11	12	223	101	61	41	79	24	35	23	31	34	15	23	19	39	14	43	39	22	0	0
OTU_406	Ochrophyta	Phaeophyceae					75.62	Published	GTTAAGTGGTATTGATGCACATTCAGGCCCTGCCGTTGATTTAGCAATATTTAGCTTGCATTTATCTGGAGCTTCTTCAATTGCTGGAGCTATAAATTTTATCGTAACTATTGTTAACATGAGAGCTCATGGTTTAAAATTTAACATTTTACCATTATTCGGTTGATCAGTTCTGGTAACAGCATTTTTATTATTGTTATCATTA	21	23	22	26	30	21	32	14	21	38	6	20	10	15	24	31	18	12	7	18	73	101	24	12	48	50	52	36	33	33	21	23	26	31	28	28	24	59	0	0
OTU_407	Bacillariophyta	Mediophyceae	Stephanodiscales	Stephanodiscaceae			90.55	Published	GTTATCGAGTGCAACAGCTCATTCAGGCGGCTCCGTGGATCTAGCTATATTTAGTCTGCATTTATCAGGTGCATCGTCTATTTTAGGTGCCATTAATTTTATTTGTACAATTTTTAATATGCGAGTAAAAAGTCTATCTTTTCATAACCTTCCATTGTTCGTATGATCTGTTTTAATCACAGCATTTTTACTACTGCTGTCTTTA	29	28	18	37	36	22	37	21	14	60	41	17	17	18	16	26	28	20	18	9	11	101	79	26	33	37	45	29	46	33	13	26	17	45	32	21	35	38	0	0
OTU_408	Arthropoda	Insecta					74.56	Published	GTTATCAAGTACTTTAGGTCATTATGGTAGTGCCGTTGATGTAGCTATAATTTCATTACACCTGGCCGGTATTTCCTCATTGTTGGGTTCAATAAATATGATAGTTACCATTTTTAATATGCGCGCGCCTGGCTTAAGTATGGACCGGTTAAATCTTTTTGTTTGATCGATTTTGGTTACGTCTTTTTTACTTTTACTGTCATTA	8	10	22	36	36	19	11	6	25	25	31	9	10	6	12	24	7	6	13	5	117	256	12	40	20	26	41	45	16	18	14	17	35	22	14	8	23	6	0	0
OTU_409	Arthropoda	Collembola	Symphypleona	Katiannidae	Sminthurinus	Sminthurinus elegans	100	Private	CCTATCTTCTACACTATCACACACAGGAGCTTCAGTGGACTTGACTATTTTTAGTTTACACTTAGCAGGTGTTTCTTCAATTCTAGGGGCAATTAATTTCATTACTACAATTATCAATATACGAACACCCGGTATGAGATGAGATCGAACACCTTTATTTGCTTGGTCTGTAATTATCACAGCAATTTTATTGCTTCTTTCCCTC	0	0	6	1	0	0	5	5	0	0	3	0	3	5	1	0	0	0	4	1	172	261	80	67	35	29	4	3	0	1	0	0	40	30	5	3	3	0	0	0
OTU_410	Heterokontophyta	Oomycota					81.82	Published	ATTATCCAGTACCCAAGCCCATTCGGGACCATCGGTTGATTTAGCGATTTTTAGTTTGCATTTATCAGGAATAGCTTCTATTTTAGGTGCAATTAATTTCATTACGACAATTTTTAATATGCGCTTACCTGGGATGACATTTCATCGATTGCCGTTATTTGTTTGGTCAATTTTAATTACATCTTTTTTATTATTATTGTCGTTG	32	24	25	19	34	20	34	37	38	38	34	20	27	27	26	33	26	42	14	12	144	0	32	13	49	33	51	41	29	15	14	15	29	34	23	46	178	214	0	0
OTU_411	Bacillariophyta	Bacillariophyceae					84.8	Published	ATTATCAGGTATTATTGCGCACTCTGGTGGTGCCGTTGATCTTGCAATTTTCAGTTTACATTTATCAGGTGCTGCATCAATTTTAGGAGCAATCAATTTTATTTGTACAATCGTAAACATGCGAACTGAGAGTTTACCGTTCCATAAGTTACCGTTATTTGTTTGGTCTGTTTTCATTACTGCAATTCTGCTACTACTATCTTTA	21	17	28	25	21	21	47	26	34	33	43	17	34	53	66	45	44	49	58	42	122	43	21	17	46	36	33	14	46	14	16	10	46	34	21	37	67	44	0	0
OTU_412	Arthropoda	Insecta					80.1	Published	TTTATCGAGTATTCAAGCTCATTCTGGTGCTTCTGTAGATTTAGCGATTTTTAGTTTACATTTAGCCGGTATTTCTTCTATTTTAGGAGCTGTTAATTTTATCACTACAATCTTAAACATGAGACCGGAAAAAATGAATATGCATTTATTACCTTTATTTGTCTGGGCGGTTTTAATTACTGCGGTATTACTATTACTATCTTTA	28	11	15	12	16	16	31	6	10	33	15	9	26	11	12	25	23	17	12	18	70	119	25	21	50	23	43	34	26	16	7	12	21	17	4	20	17	10	0	0
OTU_413	Rotifera	Monogononta	Ploima	Synchaetidae	Polyarthra		97.94	Published	TCTGGCAGATGCTAAATATCATTCAGGTATTTCTGTTGATTTGGCGATTTTTTAGTCTCATTTAGCTGGAGTTTCTTCTATTTTAGGAAGAATTAATTTTTTAACTACTATTATTTGTTCTCGTACTACAAAATTGATTTCTATGGATCGTTTACCTTTGTTATTATGAGCAATTTCAGTTACAGCTGTATTGTTAATTACAAGATTA	251	239	348	401	1107	1150	466	559	271	574	503	185	948	1024	972	1269	285	260	728	773	81	76	51	38	67	59	883	816	976	1116	523	557	185	189	549	599	1463	1855	0	0
OTU_414	Porifera	Demospongiae					81.37	Published	ACTAGCAAGTATAGAATATCATTCAGGAGGATCTGTAGATTTAGCAATCTTTAGTTTACATTTAGCGGGAATTTCATCAATTTTAGGTGCAACAAACTTTATTACTACAATTTTAAATATGAGAGCTCCAGGAATGACTATGCATAAATTACCTTTATTCGTTTGAGCCGTATTTATAACAGCTTGATTATTATTATTATCTTTA	16	1	5	4	5	33	1	10	6	1	18	3	5	3	5	9	8	13	1	0	94	295	22	9	7	6	8	15	16	6	7	12	11	10	4	4	12	3	0	0
OTU_415	Heterokontophyta	Oomycota	Saprolegniales	Leptolegniaceae			90.2	Published	TTTATCTAGTATTTTAGCACATTCAGGTCCTTCAGTTGATTTAGCAATTTTTAGTTTACATTTAGCAGGTATTTCTTCATTATTAGGTGCAATTAATTTTATAACAACCATTTATAACATGAGAGCACCTGGATTAACATTTCACAAGTTACCTTTATTTGTATGGTCTGTTTTAATTACAGCATTTTTATTATTATTAAGTTTA	28	27	27	35	33	22	55	30	32	66	46	17	32	38	39	57	81	32	36	29	69	21	35	20	48	38	41	27	17	29	33	29	34	62	30	27	41	45	0	0
OTU_416	Ochrophyta	Phaeophyceae	Ectocarpales				85.29	Published	ATTATCAAGCGTTCAAGCTCATTCAGGACCTTCTGTTGATTTAGCAATTTTTAGTTTACATTTATCAGGTGCTTCGTCAATTTTAGGATCAATTAACTTTATTACTACTATTTTTAATATGCGAGCTCCAGGTCTTACTATGCATAGACTACCTTTATTCGTTTGGTCGGTTTTAATTACAGCATTTTTACTTTTATTATCGTTA	16	16	24	2	8	13	20	15	11	18	10	7	5	6	9	7	9	2	7	6	87	43	20	25	23	11	20	20	8	11	11	16	24	17	9	11	17	8	0	0
OTU_417	Ochrophyta	Raphidophyceae					83.33	Published	GCTTTCAAGTGTTGAAGCTCATTCAGGACCTTCTGTTGACTTGGCTATTTTTAGTTTGCATTTGGCTGGTGCTTCTTCTATTTTGGGAGCCATTAATTTTATTACTACTATTTTTAATATGCGTAGTCCAGGTATAACAATACATAGGTTGCCTTTGTTTTGTTGGGCAGTATTGATTACAGCATTTTTGCTTTTGTTGTCTTTG	7	11	23	13	5	11	13	9	18	10	12	6	15	7	7	22	11	13	17	6	106	37	19	15	15	11	23	19	11	22	10	13	13	7	5	10	8	12	0	0
OTU_418	Heterokontophyta	Oomycota	Pythiales	Pythiaceae			91.18	Published	ATTATCAAGTGTATTAGCACATTCAGGTCCTTCAGTTGATTTAGCAATTTTTAGTTTACATTTAGCAGGTATTTCATCATTATTAGGTGCAATTAATTTTATAACAACAATTTATAATATGCGAGCACCTGGTTTAACATTTCATAAATTACCTCTATTTGTTTGGTCTGTTTTAATTACAGCATTTTTATTATTATTAAGTTTA	52	13	24	34	24	20	26	26	15	37	25	6	2	17	22	16	28	19	18	14	227	103	28	31	18	33	32	37	40	33	10	9	41	11	13	12	8	18	0	0
OTU_419	Rotifera	Monogononta	Ploima	Synchaetidae	Polyarthra		95.98	Published	CTTGTCTGACTCAAAATATCATTCTGGTATTTCTGTTGACTTAGCTATTTTTAGACTTCATCTTGCAGGTATTTCGTCAATTTTAGGAAGAATTAATTTTCTTTCAACTATTATTTGTTCTCGTACTACTAAGTTAGTTTCTCTAGATCGTTTACCTCTTATACTTTGAGCTCTAGCTGTAACAGCTGTTCTTCTTGTTACAAGACTT	20	16	5	5	132	112	0	9	1	0	11	1	8	23	9	4	0	0	0	0	0	0	2	0	0	0	0	0	73	71	13	14	21	7	31	22	112	91	0	0
OTU_420	Porifera	Demospongiae					79.6	Published	ACTATCAAGCATAGGTTTCCATTCAGGAGGTTCTGTTGATTTAGCTATATTTAGTTTACATTTAGCCGGGATATCATCAATCTTAGGTACAGTTAACTTTATAACAACTATATTTAATATGAGAGCACCTGGTATGACTATGCACAGATTACCTCTATTCGTTTGAGCAGTTTTAATAACAGCTTTCTTATTAATATTATCTTTA	0	0	0	0	0	0	0	0	0	0	0	0	0	0	0	0	0	0	0	0	0	0	0	0	0	0	0	0	0	0	0	0	0	0	0	0	0	0	0	0
OTU_421	Rotifera	Monogononta	Ploima	Brachionidae	Keratella		96.84	Published	CCTATCTGATTCTAAGTACCATTCCGGTATTTCAGTTGATCTTGCTATTTTTAGCCTTCATCTAGCAGGAATTTCTTCTATCCTTGGTAGAATTAATTTTCTTACTACTATTGTTTGTTCTCGTACTACTAAAGTTATTTCCCTTGACCGTATGCCCCTTATACTTTGAGCTATCTCAGTTACTGCTGTTCTTTTGATTACTAGACTG	17	20	7	17	134	132	0	88	18	0	108	11	99	152	0	0	133	137	54	41	0	0	0	0	0	0	0	0	32	19	57	111	39	34	28	14	0	0	0	0
OTU_422	Ochrophyta	Phaeophyceae					80.3	Published	GTTAAGCAGTATTATTGCGCATTCAGGCCCTGCTGTAGATTTAGCAATTTTTAGTTTACACTTATCTGGTGCAGCATCTATTTTAGGAGCTATTAATTTTATTACTACTACATTTAATATGCGCAGCCCGGGTTTATACATGCACAGATTGCCTTTATACGTTTGGTCTTTATTAATAACATCTTTCCTTTTATTAATTTCGTTA	27	18	21	34	23	13	26	17	25	26	27	8	4	8	12	16	18	19	18	15	53	99	37	11	32	27	47	22	29	31	13	9	31	30	12	27	13	25	0	0
OTU_423	Rotifera	Monogononta	Ploima				87.06	Published	TTTGTCTGACTCTAAGTATCATAGTGGTATTTCTGTTGACTTAGCTATCTTTAGGCTTCATCTTTCTGGTGTTTCCTCTATCCTAGGAAGTATCAACTTTCTTACCACTATCCTCGTCTCTCGTATGACCTCTACTCTAAGGCTTGATCGTTTACCCCTCTTTCTTTGATCTATTGCTATCACTGCCGTTCTTTTAATTGTTAGTCTT	7	6	13	17	8	5	0	24	0	0	19	0	0	0	0	0	0	0	0	0	1	0	29	32	0	0	45	60	124	69	50	39	37	27	13	6	56	38	0	0
OTU_424	Rotifera	Monogononta	Ploima	Synchaetidae	Polyarthra		96.83	Published	TCTAGCAGATGCTAAATATCATTCAGGTATTTCTGTTGACTTGGCGATTTTTAGTCTTCATTTAGCTGGAGTTTCTTCTATTTTAGGGAGAATTAATTTTTTAACTACTATTTTGTTCTCGTACTACAAAATTGATTTCTATGGATCGTTTACCTTGTTATTATGAGCAATTTCAGTTACAGCTGTATTGTTAATTACAAGACTA	87	111	31	38	6	16	4	8	5	10	4	3	586	688	295	362	0	1	7	2	0	0	0	0	0	0	2	2	119	130	3	13	93	111	5	7	7	20	0	0
OTU_425	Arthropoda	Insecta					78.31	Private	ATTAAGTACATCGGCTTTTCATTCTGGTGGTGCGGTTGACTTAGCGATTTTTAGTTTACACATTTCAGGTACTTCATCGTTGTTGGGTGCGATAAATTTTATTGTTACGTCTTTGAATATGCGTACTTATGGTATGAGCATGCAAAATATGCCATTATTTGTTTGAGCTGTTTTAGTTACAGCAATTCTATTGTTATTGTCATTA	25	4	10	40	27	14	14	11	1	10	24	9	9	22	6	19	1	24	18	1	111	712	35	18	12	15	70	25	5	6	13	3	20	3	24	30	41	26	0	0
OTU_426	Heterokontophyta	Oomycota					80.39	Published	TTTATCTAGTAATCTTGGGCATGCTGGTCCGTCTGTGGATCTTGCAATTTTTAGTTTACATTTAGCTGGTATTTCTTCAATACTTGGAGCTATTAATTTTATAGTTACTATTTTTAATATGAGAACTAGAGGTTTAAAATTTTATAAATTACCTTTATTTGTATGGTCGGTTTTAATAACTGCTTTTTTATTATTACTATCATTA	7	7	8	10	7	12	16	17	6	29	9	1	8	2	10	13	10	17	6	8	65	98	18	7	19	22	17	10	9	10	9	10	11	12	8	9	10	6	0	0
OTU_427	Rotifera	Monogononta					78.11	Private	TTTATCCGATTCTAAGTATCATAGTGGGATTTCTGTAGATTTAGCTATTTTTAGATTGCATTTAGCAGGAATTTCTTCTATTTTAGGTAGAATTAACTTCCTTACTACTATTGTTGTATCTCGAATGTCTTCTGATATGACTTTAGATCGTCTTCCACTGTTTTTATGGGCTATTGCTATTACAGCCGTTCTATTGATTGTTAGATTA	0	0	0	0	0	0	0	0	0	0	0	0	0	0	0	0	0	0	0	0	0	0	0	0	0	0	0	0	0	0	20	44	0	0	52	55	98	89	0	0
OTU_428	Ochrophyta	Phaeophyceae					80.39	Published	TTTAAGTAGCATTATTGCTCATTCAGGACCTTCTGTAGATTTAGCAATCTTTAGTTTACATTTGTCTGGTGCAGCCTCGATTTTAGGAGCTATAAACTTTATTACTACTACATTTAACATGCGTAGTCCAGGTTTATACATGCACAGATTACCTTTGTACGTTTGGTCTTTATTAATAACATCTTTTCTTTTATTAATTTCATTA	21	13	20	17	10	18	28	20	14	24	13	4	10	15	7	8	20	9	20	8	125	91	12	38	33	32	17	26	33	19	27	15	12	18	4	21	13	10	0	0
OTU_429	Ochrophyta	Raphidophyceae					80.34	Published	GTTAAGTAGTATAATTGCTCATTCTGGACCTTCTGTTGATTTAGCAATTTTTAGTTTACATTTATCAGGTGCAGCGTCAATTTTAGGTGCAATAAATTTTATAACAACAACTTTTAACATGCGTAGTCCTGGTTTGTATATGCATAGACTTCCATTATACGTTTGGTCATTATTAATAACATCATTTTTATTGCTAATATCATTA	5	12	24	13	21	24	26	29	10	17	15	1	15	11	10	21	12	9	3	9	99	110	26	15	25	29	10	22	21	21	11	5	13	8	8	20	9	13	0	0
OTU_430	Rotifera	Monogononta	Ploima	Synchaetidae	Polyarthra	Polyarthra dolichoptera	98.46	Published	TCTGGCAGATGCTAAATATCATTCAGGTATTTCTGTTGATTTGGCGATTTTTAGTCTTCATCTAGCTGGAGTTTCTTCTATTTTAGGAAGAAATTTTTTAACTACTATTATTTGTTCTCGTACTACAAAATTGATTTCTATGGATCGTTTACCTTTATTATTATGAGCAATTTCAGTTACAGCTGTATTGTTAATTACAAGATTA	12	7	196	210	126	97	213	47	3	180	43	0	215	227	97	102	30	32	96	109	156	149	1	1	0	1	68	48	41	52	38	44	83	80	48	48	223	306	0	0
OTU_431	Arthropoda	Insecta					75.12	Published	ATTATCAGATTCTCCTTATCATTTAGGTGCAGCAGTAGATTTATCTATTTTAAGTTTACATATTGCTGGTATTTCATCATTATTAGGAGCATTAAATTTAATTGTAACTATTATTAATATTAGAAGTCCTGGATTAACATTTGAAAGATTACCACTTTTTGTTTGGGCAATATTTATAACTGCATGGTTATTAGTTTTATCATTA	11	15	32	23	20	15	28	15	22	33	13	6	13	14	20	10	5	13	7	6	269	314	49	31	52	50	59	48	22	42	18	19	46	35	16	24	33	26	0	0
OTU_432	Rotifera	Monogononta	Ploima	Synchaetidae	Polyarthra		97.92	Published	TCTGGCAGATGCTAAATATCATTCAGGTATTTCTGTTGATTTGGCGATTTTTAGTCTTCATTTAGCTGGAGTTTCTTCTATTTTAGGAAGAATTAATTTTTTAACTACTATTATTTGTTCTCGTACTACAAAATTGATTTCTATGGATCGTTTACCTTTGTTATTATGAGCAATTTCAGTTACAGCTGTATTGTTATCGTTA	263	208	365	371	993	947	415	395	232	469	462	155	795	881	798	1018	212	198	673	610	51	108	32	29	68	57	727	670	676	855	418	516	172	149	428	493	1220	1551	0	0
OTU_433	Cnidaria	Hydrozoa					81.09	Private	TCTTTCAGGCATTCAAGCACATTCAGGACCTTCTGTAGATTTAGCTATTTTTAGCTTACATTTAGCAGGAGCTTCTTCATTATTGGGTGCGATAAACTTTATAGTTACGATTTTAAATATGAGATGTCCAGGTATGTTTATGCATAAATTACCTTTATTTGTATGATCAGTTTTCATTACGGCAATTTTATTATTACTATCTTTA	18	15	10	26	10	12	25	16	14	22	35	4	21	20	8	13	13	20	10	9	9	17	42	25	39	28	42	25	11	19	8	14	21	16	9	18	25	15	0	0
OTU_434	Arthropoda	Insecta					76.72	Early-Release	TCTAAGCGGTGTTTTTGCGCATTCTGGACCATCTGTAGACATAGCAATCTTTAGTTTACATTTAGCTGGTATTTCCTCAATAGCCGGTGCTATTAATTTTATTGTTACTATTTTGAATATGAGGTGTAGAGGCATGAGTTTTAATCGTTTACCTTTATTTGTATGAACTGTGTTGGTTACTGCAGTATTGTTACTTTTATCGCTG	11	17	39	24	52	19	22	26	17	41	37	12	17	25	35	57	31	28	22	21	24	51	21	2	79	22	31	43	30	30	16	16	29	31	21	33	32	20	0	0
OTU_435	Arthropoda	Insecta					80.21	Private	TATTGCTTCTATTGAATATCACTCCGGAGGTTCTGTAGATTTAGCTATTTTTAGCCTACATCTTGCGGGGATATCTTCTATTTTAGGGGCTATGAACTTTATTACAACTATCCTTAATATGAGAACTCCTGGTATGACTATGCATAGATTACCTTTATTCGTATGAGCAGTATTTATTACAGCCATATTATTAATATTATCTTTG	6	4	9	9	7	4	22	14	12	12	12	4	3	12	7	18	17	22	4	1	66	54	12	18	18	23	21	12	14	11	9	5	8	13	4	6	11	11	0	0
OTU_436	Arthropoda	Insecta					82.04	Private	ATTAGCTGGTATTGAAAGCCACTCAGGTGGGTCTGTAGATTTAGCAATTTTTAGTTTACATTTAGCTGGTGCATCATCGATTTTAGGTGCTATAAACTTTATTACTACTGTAATAAATATGCGTTCTCCTGGAATTAAAATGCATAGAATACCATTATTTGTTTGAGCGGTATTTATAACTGCAATTTTATTATTATTATCATTA	14	15	23	22	18	26	28	20	19	43	32	14	11	33	19	28	25	31	30	24	248	119	28	24	47	28	35	36	27	25	27	25	44	47	20	23	21	14	0	0
OTU_437	Arthropoda	Insecta	Lepidoptera				86.52	Private	ATTATCAGGTATTGAAAGTCATTCTGGAGGTTCTGTTGATTTAGCTATTTTTAGTTTACATTTAGCAGGTGCATCTTCAATTTTAGGAGCAATGAATTTTATTACTACTGTAATTAATATGAGAACTCCTGGTATGAAAATGCATAGAATTCCTTTATTTGTTTGAGCAGTTTTTATTACCGCATTTTTATTATTATTATCATTA	8	3	9	8	16	14	23	17	13	17	20	8	14	5	12	10	14	11	9	9	45	124	17	10	20	26	17	15	9	13	12	9	19	19	17	3	9	8	0	0
OTU_438	Ochrophyta	Phaeophyceae	Ectocarpales				86.87	Published	ATTAAGTAGTATTCAATCTCATTCAGGTCCTGCAGTGGATTTAGCTATTTTTAGTCTGCATTTATCAGGTGCTGCTTCTATTTTAGGTTCTATTAATTTTATTACTACTATTTTTAATATGAGAGCTCCTGGTTTAACCATGCATAGATTACCTTTATATGTATGGGCTGTTTTAATTACCTCATTTTTATTATTATTATCATTA	8	13	8	7	1	8	12	7	6	13	8	0	4	7	9	13	7	17	3	5	168	171	8	26	30	25	17	26	14	4	8	14	9	15	4	11	9	1	0	0
OTU_439	Rotifera	Monogononta	Ploima	Synchaetidae	Synchaeta		95.38	Published	ATTATCTGATTCTAAATTTCATTCTGGTATTTCTGTTGATTTAGCTATTTTCAGTTTACATTTAGCTGGTATTTCTTCTATTTTAGGTAGTATTAATTTTATAACTACTATTATTTGTTCTCGTACAACAAAGATAATTAGTATAGATCGTTTACCACTAATGTTATGATCATTAGGTGTAACAGCTTTTCTTTTACTAACTACTTTA	32	20	104	113	95	115	30	43	12	28	32	6	70	76	16	19	41	32	37	50	0	4	2	3	5	4	9	2	30	55	90	99	210	207	40	62	60	58	0	0
OTU_440	Bacillariophyta	Mediophyceae					81.86	Published	TTTATCAAGTATAACAGCACATTCAGGAGGAGCTGTAGACTTAGCTATTTTCAGTCTTCACTTATCAGGAGCTTCTTCTATTTTAGGAGCTATTAACTTTATTTGTACTATTTTTAACATGCGTACAGATAGTTTACCTTTCCATAAACTTCCTTTATTCGTTTGGGCTGTTCTTATAACAGCAGTATTATTACTTTTATCTTTA	6	6	11	2	13	8	3	3	15	9	14	1	8	17	11	16	21	7	14	20	11	3	7	11	12	11	12	10	8	9	10	6	11	16	4	7	15	17	0	0
OTU_441	Rotifera	Monogononta	Ploima	Synchaetidae			92.71	Published	TCTGGCAGATGTTAAATATCATTCAGGTATTTCTGTTGATTTGGCGATTTTTAGTCTTCATTTAGCTGGAGTTTCTTCTATTTTAGGAAGAATTAATTTTTTAACTACTATTATTTGTTCTCGTACTACAAAATTGATTTCTATGGATCGTTTACCTTTGCTTATGAGCAATTTCAGTTACAGCTGTATTGTTAATTACAAGACTA	26	24	27	34	109	90	40	38	21	34	27	9	1009	994	65	111	16	13	65	55	3	3	3	2	6	2	65	80	69	85	43	56	1373	1434	37	64	122	146	0	0
OTU_442	Heterokontophyta	Oomycota					81.37	Private	TTTAAGTAGTGTTCAAGCTCATTCAGGAGCTTCTGTAGATTTAGCTATTTTTAGTTTGCATTTAGCCGGTGTTTCTTCTATTTTAGGTAGTATAAATTTTATAACAACTATTTTTAATATGAGATCTGATGGTTTAACTTTACATCAGATGCCACTTTTTGTTTGGTCAATTTTAGTAACTGTTTTTTTATTGTTATTGTCTTTA	31	8	10	12	19	7	20	21	17	22	29	15	7	18	11	20	23	18	19	13	206	111	14	15	26	27	18	26	20	16	18	8	29	30	8	19	15	35	0	0
OTU_443	Heterokontophyta	Oomycota	Pythiales	Pythiaceae			92.16	Published	ATTATCTAGTGTACAAGCACATTCCGGTCCTTCTGTAGATTTAGCTATTTTTAGTTTACACTTATCAGGTATTTCGTCTCTGTTAGGTGCTATTAATTTTTTATCAACAATTTATAATATGAGAGCTCCTGGTTTAAGTTTTCACAGATTACCTTTATTCGTATGGTCTGTTTTTATAACCGCTTTTTTATTATTATTAACATTA	22	29	21	11	21	35	4	19	7	12	26	12	6	11	11	8	15	10	10	2	231	267	81	45	52	54	83	53	12	8	19	35	19	18	23	25	20	14	0	0
OTU_444	Bacillariophyta	Mediophyceae	Thalassiosirales	Skeletonemataceae	Skeletonema		96.08	Published	TTTATCAAGTGCAACAGCTCACTCTGGAGGTTCTGTAGATTTAGCAATATTTAGTTTACATTTATCAGGCGCATCTTCTATATTAGGAGCTATTAATTTCATTTGTACAATCTTCAATATGCGAGTAAAAAGTTTATCTTTTCATAATCTTCCTCTATTCGTATGATCTGTTTTAATAACAGCGTTTTTACTGTTATTATCTTTG	65	112	61	77	44	73	41	61	30	51	45	61	31	46	45	56	58	84	61	47	1	4	72	82	67	85	89	74	88	123	37	62	51	66	38	41	47	76	0	0
OTU_445	Arthropoda	Collembola	Entomobryomorpha	Entomobryidae	Lepidocyrtus	Lepidocyrtus cyaneus	98.99	Published	ACTAGCTGCTGGAATCGCCCATGCCGGAGCATCAGTAGATCTTTCTATTTTTAGTCTTCATTTAGCTGGGGCTTCTTCAATTTTAGGGGCTGTAAACTTCATCACCACTATTATTAATATACGAACCCCTGGCTTGTCCTGGGACCAAACTCCGTTGTTTGTGTGATCTGTGTTCCTTACAGCAATTTTATTACTACTATCCTTG	0	0	0	4	8	0	1	0	0	0	0	0	0	0	0	0	0	0	0	0	556	276	5	25	2	0	0	0	0	0	0	0	0	1	0	0	0	0	0	0
OTU_446	Ochrophyta	Phaeophyceae					77.61	Published	GCTAAGTAGCATCGCTAGCCACTCTGGAGGATCCGTAGATTTAGCTATTTTCAGTCTTCACTTATCAGGGGCAAGTAGTATTTTAGGGGCTATCAACTTTATTACAACTATTATGAATATGCGAGCTCCAGGAATGTCAATGCACCGTCTACCTTTATTTGTATGGTCGGTATTTATTACGGCATTCTTATTATTACTATCACTT	16	10	19	15	22	15	24	14	22	32	7	13	26	20	30	20	4	22	24	17	69	231	51	65	44	20	39	39	49	40	7	10	44	23	21	13	13	14	0	0
OTU_447	Cryptophyta	Cryptophyceae					82.09	Published	CCTTAGTAGTATATCATTCCATTCTGGTGCCGCTGTTGATCTAGGTATTTTTAGTCTTCATGTCGCAGGTGCTTCTAGTATTCTTGGTGCTATCAATTTTATAACGACTATTTTTAACATGCGAATTCCTGGAATGACCATGCATAGAATACCTCTTTTCGTTTGGGCTGTATTAATAACAGCCTTCTTGCTACTCCTTTCATTA	22	19	8	16	5	5	21	12	12	26	21	2	9	8	6	11	7	14	12	10	97	315	46	34	53	29	37	27	21	19	12	14	22	23	12	30	19	14	0	0
OTU_448	Bacillariophyta	Mediophyceae	Stephanodiscales				87.69	Published	TTTATCAAGTGCAACAGCTCACTCTGGAGGTTCTGTAGATTTAGCTATTTTTAGCCTGCATTTATCAGGCGCATCTTCTATATTAGGAGCTATTAATTTCATTTGTACAATCTTCAATATGCGAGTAAAAAGTTTATCTTTTCATAATTTACCATTATTTGTGTGGTCTGTTTTAATTACTGCTTTATTGTTGTTATCATTG	4942	5037	3896	5020	3525	4462	3765	4583	2675	4977	4348	4749	2737	3560	3334	4716	3665	4836	4477	3553	1066	1311	4022	3863	4789	5311	5131	4780	4263	5428	3050	3911	3651	3926	3481	3673	2753	4539	0	0
OTU_449	Arthropoda	Insecta	Lepidoptera				87.64	Published	ATTATCTGGTATTATAGCACATTCTGGAGGTTCTGTAGATCTAGCAATTTTTAGTTTACATTTAGCTGGAGTGTCTTCTTTATTAGGTGCTATTAATTTTATTACAACTATTTTTAATATGAGAGCTAGTAATTTAAGTTTATATCAATTACCTTTATTTTGTTGAGCAATTTTAATTACTGCATTTTTATTATTATTATCTTTA	24	15	25	5	11	13	33	27	10	13	17	5	7	10	20	21	7	9	13	9	98	154	13	19	29	26	54	34	11	12	9	4	22	14	14	36	30	27	0	0
OTU_450	Ascomycota	Ascomycota_class_incertae_sedis	Ascomycota_order_incertae_sedis	Pseudeurotiaceae			90.55	Published	ACTAAGTGGTATACAAAGTCATAGTGGACCTAGTGTAGATTTAGCTATATTTGCCTTACATCTGTCTGGTATAAGTAGTTTACTAGGTGCTATGAACTTTATAACTACTATATTAAATATGAGAGCTCCAGGTATAAGATTACATAAATTAGCCTTATTTGGTTGAGCTGTAGTTGTAACAGCTGTACTATTATTACTATCTCTA	2	5	24	19	4	9	17	1	6	5	10	2	0	1	0	2	0	2	1	0	52	121	70	48	184	139	16	17	10	4	5	6	10	18	15	18	20	17	0	0
OTU_451	Basidiomycota						89.22	Private	TCTATCAGGTATCCAATCACACTCAGGGGGGTCTGTTGATTTAGCTATCTTCAGTCTTCACTTAGCAGGAATTTCATCTATGTTAGGTGCCATGAACTTTATTACTACAATCTTAAACATGCGAAACCCAGGTATGACATTACATAAACTACCACTATTCTGTTGAGCTATCATGGTAACTGCTATCTTATTACTACTATCACTA	12	43	30	6	12	30	22	11	11	4	15	10	9	10	5	15	5	0	10	2	130	207	46	28	67	14	55	38	23	25	13	7	10	3	34	11	7	33	0	0
OTU_452	Heterokontophyta	Oomycota	Saprolegniales	Saprolegniaceae	Achlya		96.08	Private	TTTAGCTAGTGTTCAAGCACACTCTGGTCCATCAGTAGATTTAGCTATTTTTAGTTTACATTTAGCGGGTATTTCATCATTATTAGGTTCTATAAATTTTATTACAACTATTTATAATATGAGATCTCCAGGTTTAACTTTTCATAAATTACCATTATTTGTTTGGTCAGTATTTATTACTGCTTTCTTATTATTATTAAGTTTA	19	13	11	19	12	16	14	14	5	13	18	1	6	4	6	9	4	5	13	9	73	116	71	31	44	43	40	39	22	16	13	21	29	13	22	14	13	12	0	0
OTU_453	Heterokontophyta	Oomycota	Pythiales	Pythiaceae			93.14	Published	TTTATCAAGTGTACAAGCACATTCAGGACCTTCAGTAGATTTAGCTATTTTTAGTTTACATTTATCAGGTATTTCATCTTTATTAGGTTCAATCAATTTTATTTCAACTATTTATAATATGAGAGCACCTGGTTTAAGTTTCCATAGATTACCTTTATTTGTATGGGCTATTTTTGTAACTGTTTTTTTATTATTATTAACTTTA	25	17	23	22	24	18	31	17	4	28	21	3	4	9	9	12	3	14	3	2	190	140	19	24	11	5	102	96	30	24	15	18	51	36	22	30	40	29	0	0
OTU_454	Bacillariophyta	Bacillariophyceae					80.88	Published	TCTTTCTGGCATAACAGCTCACTCTGGGGGTGCTGTTGATTTAGCTATTTTCAGTCTTCATTTGTCTGGAGCATCTTCTATATTAGGGGCTATTAATTTTATTTGTACGATAGTTAATATGAGAACAGACAGTTTACCATTTCATAAGCTACCTTTATTTGTTTGGTCTGTTTTAATAACTGCAGTTTTATTGTTGTTATCTTTA	56	44	42	45	44	19	43	10	15	38	25	10	3	2	9	29	12	20	15	17	131	151	33	15	45	17	52	54	33	39	12	16	53	33	23	36	50	46	0	0
OTU_455	Ochrophyta	Phaeophyceae					74	Published	TCTAAGCGGGATCCAAGCACACTCAGGCCCATCAGTTGACCTTGCTATCTTCTCTCTTCACCTTTCGGGTGCTGCATCAATCCTTGGTGCTATTAACTTTATTGTTACCATTTTTAATAGACGTGCTCCAGGGCTTTTTAGACACAAACTACCTCTTTTTGTTTGATCTGTTCTAATTACAGCATTCCTTCTTCTTCTTTCTCTT	13	19	17	9	14	19	24	14	22	52	8	10	13	11	16	17	12	17	11	11	115	87	52	20	23	14	37	34	10	18	11	13	18	11	7	19	12	15	0	0
OTU_456	Ascomycota	Leotiomycetes	Leotiomycetes_order_Incertae_sedis	Leotiomycetes_family_incertae_sedis			90.55	Published	TCTTAGTGGTGTTCAAAGTCATAGTGGACCTAGTGTTGATTTAGCTATTTTTGCTTTACACTTATCCGGTATTAGTAGTTTATTAGGTGCTATTAACTTTATTACTACTATTCTTAATATGAGAAGTCCTGGTATTAGATTACATAAATTAGCTTTATTTGGTTGAGCTGTTGTTGTTACTGCTGTTTTATTATTATTATCTTTA	26	28	60	60	16	16	16	16	8	28	35	5	12	18	39	26	14	13	8	19	212	74	51	27	56	69	36	32	19	10	30	28	20	18	15	34	25	17	0	0
OTU_457	Heterokontophyta	Oomycota					79.1	Published	TTTGTCTAGTATCACAGCTCATTCAGGTGCGGCTGTAGATTTAGCTATATTTAGTTTACACTTATCTGGAATTTCATCATTGTTAGGTGCAATTAATTTTATTTGTACTATTTTTAATATGCGAACAAAAAGTATGCCTTTTCATAGACTGCCCTTATTTGTTTGGTCTATATTGATAACAGCATTCTTATTGCTGTTGTCACTA	23	21	12	21	10	23	22	16	27	26	29	9	11	15	17	15	22	26	15	19	18	32	26	35	37	32	12	17	21	17	12	6	33	14	16	18	24	14	0	0
OTU_458	Rhodophyta	Florideophyceae					75.12	Early-Release	TTTGAGCTCTGTTTTAGCGCACTCCGGTTGTGCTGTAGATTTAGCTATATTTAGTTTGCATATTGCAGGTGTCTCTTCAATAGCAGGAGCTATAAATTTTATTGTAACTATAATAAATATGAGATGTCCTGGATTGTATTTTAGAAGATTACCTTTGTTTGTATGATCTGTTTTTGTAACTGCTTTTTTGCTTTTATTATCTTTA	12	13	9	18	11	4	6	3	14	13	9	1	10	12	16	8	6	4	17	8	95	279	70	28	23	34	5	17	8	14	2	2	1	5	48	74	1	0	0	0
OTU_459	Rotifera	Monogononta	Ploima	Synchaetidae	Polyarthra		96.41	Published	TCTATCTGATGCTAAGTATCACTCTGGTATTTCTGTTGATCTTGCTATTTTCAGTCTTCATTTAGCCGGTGTCTCTTCTATTTTAGGTAGAATCAATTTTCTTACTACTATTGTGTGTTCTCGTACTACTAAGCTAATCTCTTTAGATCGTTTACCTCTATTACTATGAGCTATCTCTATTACTGCTATCTTACTTATTACAAGACTT	0	1	0	0	2	4	13	9	10	18	9	29	4	11	21	21	4	7	149	130	0	0	0	0	0	0	0	1	0	3	2	3	33	20	0	0	1	8	0	0
OTU_460	Ochrophyta	Raphidophyceae					82.46	Published	ACTATCTAGTGTTCAAGCACACTCAGGACCTTCTGTAGATCTAGCAATTTTTAGTCTACACCTTGCAGGTGCTTCTTCTATTCTAGGTGCGATTAATTTTATTGTAACTATTTTAAATATGAGATGTCCTGGAATGTTTATGCATAAATTACCTTTATATGGTTGAGCAGTTTTTATTACAGCAATTTTACTATTATTATCATTA	11	3	6	9	3	4	3	10	2	6	7	2	4	8	6	9	12	9	9	5	4	39	1	7	11	17	27	14	9	5	6	5	12	11	10	17	4	7	0	0
OTU_461	Heterokontophyta	Oomycota					81.59	Published	TCTATCTAGTATAGAATACCACTCAGGTGGTTCTGTAGATTTAGCTATTTTTAGCTTACATTTAGCAGGTATTAGCTCTATATTAGGTGCATCTAACTTTATTACTACAATTTTAAATATGAGAGCTCCTGGTATGACTATGCACAGATTACCTTTATTTGTTTGATCTGTATTTATTACAGCTATATTATTATTATTATCTTTA	6	4	7	5	10	6	7	9	6	15	9	6	11	5	10	11	9	9	6	1	112	46	18	19	14	13	13	18	7	7	4	9	6	9	4	3	4	5	0	0
OTU_462	Ochrophyta	Phaeophyceae					78.35	Published	ACTAAGTAGTATTCAAGCACATTCAGGTCCATCTGTGGATCTAGCTATTTTTAGTCTGCACCTTTCAGGTGCTTCATCTATTATGGGAGCAATTAATTTTATTGCTACTGTACTAAATATGCGTGCTCCAGGTAGGTTTAGGCATAAACTGCCACTATTTGTATGAGCTGTACTAATTACAGCCTTCCTACTTCTTCTATCACTG	19	12	9	7	19	19	12	14	12	2	18	8	11	7	9	16	20	5	13	11	140	86	23	23	40	16	20	19	9	26	10	15	35	14	12	16	12	24	0	0
OTU_463	Ochrophyta	Raphidophyceae					83.76	Published	TTTAAGTAGCATTCAAGCTCATTCAGGATCTTCTGTGGATTTAGCAATTTTCAGTTTACATTTATCAGGAATCGCTTCAATTTTAGGGGCTATCAATTTTATTACTACCATTTTTAATATGAGATCACCAGGGTTAGGTTATCACAGATTACCTTTATACGTTTGGGCTGTTTTAATTACATCGTTTTTATTATTATTGTCGTTA	15	8	16	7	2	7	27	3	4	18	8	4	7	12	9	13	11	14	7	6	163	142	29	23	35	23	33	9	26	14	6	13	31	28	17	6	10	16	0	0
OTU_464	Rotifera	Monogononta	Ploima	Synchaetidae			90.48	Published	TCTATCTGATGCTAAGTATCATTCTGGTATTTCTGTTGATCTTGCTATTTTCAGTCTTCATTTAGCTGGTGTCTCTTCTATTTTAGGTAGAATCAATTTTCTTACTACTATTGTGTGTTCTCGTACTACTAAGCTAATCTCTTTGGATCGTTTACCTTTATTACTATGGGTCTCTATTACTGCTATCTTACTTATTACAAGACTT	17	19	83	133	90	97	241	537	264	239	537	231	784	880	289	366	658	679	126	121	0	0	26	28	0	0	9	11	45	53	90	96	728	721	18	14	256	280	0	0
OTU_465	Heterokontophyta	Oomycota	Pythiales				89.22	Published	TTTATCTAGTATTTTAGCACATTCAGGTCCTTCTGTAGATTTAGCAATCTTTAGCTTACATTTAGCAGGTATTTCTTCATTATTAGGAGCAATTAATTTTATAACAACAATTTATAATATGCGAGCACCTGGATTAACATTTCATAAATTACCTTTATTTGTTTGGTCTGTTTTTATTACAGCATTTTTATTATTATTAAGTTTA	12	10	23	7	12	20	14	13	16	15	17	3	18	11	24	16	10	6	6	20	68	266	41	12	49	42	32	31	16	14	10	11	17	13	14	6	14	11	0	0
OTU_466	Ochrophyta	Phaeophyceae					75.9	Published	TCTAAGTAGTATTCAAGCACACTCAGGACCATCAGTAGATCTAGCTATTTTTAGTCTACACATTTCTGGAGCATCTTCAATTAGGGGAGCTATTAACTTTATCGTAACTATCCTAAACAGGCGTGCACCTGGACTATTTAGGCATAAAATCCCTCTATTTGTATGAGCAGTACTTATTACTGCATTCCTACTTCTACTATCTCTT	7	21	20	2	1	5	1	6	3	0	5	8	0	8	3	3	8	7	2	5	22	21	9	7	18	14	6	6	5	7	9	1	5	2	1	6	5	0	0	0
OTU_467	Rotifera	Monogononta					78.28	Published	TTTAGCTGATTCTAAATTTCATACAGGTATCTCCGTTGATCTAGCAATTTTTAGGCTTCATTTAGCCGGTATTTCTTCTATCTTAGGTAGAATTAACTTTTTGACCACAATTTTAGTTTCACGTATGACTTCTTCCCTTAGACTCGCACGTTTGCCTCTATTCTTGTGATCTGTAGCTATTACAGCTGTTTTACTAATTGTTAGTCTA	0	0	25	12	28	22	0	0	0	0	0	0	1	3	0	0	9	10	0	0	0	0	0	0	0	0	31	23	0	0	21	29	79	81	0	0	0	0	0	0
OTU_468	Cnidaria	Hydrozoa					83.08	Private	ATTATCAGGTATAGAAAGTCATTCTGGAGGTTCAGTCGATTTAGCAATATTTAGTTTACATTTAGCAGGTGCATCTTCTATTTTAGGAGCTATGAATTTTATTACCACAATAATAAATATGAGAGCTCCGGGTTTAAAAATGCATAGACTACCTTTATTTGTTTGAGCTGTATTTATAACAGCATTTTTATTATTATTATCGCTA	30	45	41	34	26	29	32	21	6	28	17	5	2	4	3	12	8	12	7	8	104	182	31	6	17	23	61	49	12	20	17	10	15	27	30	36	45	38	0	0
OTU_469	Ochrophyta	Raphidophyceae					76.47	Published	ACTAAGTAGTATTCAAGCACATTCAGGACCATCTGTAGATCTTGCTATTTTTAGTCTACACCTATCTGGAGCTTCTTCTATTAGGGGTGCTATTAACTTTATTGTAACTATTTTTAATAGGCGTGCTCCTGGACTATTTAGGCATAAACTACCACTGTTTGTTTGAGCTGTGCTTATTACAGCATTCCTGCTACTACTATCACTA	5	13	10	23	17	17	13	7	9	12	3	4	0	11	5	5	9	4	1	5	81	60	19	16	12	8	13	16	14	11	1	4	5	8	5	16	8	2	0	0
OTU_470	Cnidaria	Hydrozoa					78.61	Published	TCTTTCAGGAATTCAAGCGCATTCAGGACCATCTGTAGATTTTGCAATTTTTAGTTTACATTTATCAGGTGCAAGCTCAATTATGGGGTCTATTAATTTTATTGTAACCATTATTAATATGAGAGCGCCAGGAATGTTTATGCATAAAATGCCATTATTTGCATGATCTATTTTTGTAACATCTTTCTTACTTTTATTATCATTA	16	7	9	3	4	6	4	6	5	14	7	3	5	5	6	6	8	10	3	7	83	66	21	15	15	16	25	16	10	7	6	6	12	9	11	8	1	4	0	0
OTU_471	Arthropoda	Insecta	Lepidoptera				88.76	Private	TTTAGCAAGTATAGAAAGTCATTCTGGTGGATCTGTAGATTTAGCGATTTTTAGTTTACATTTAGCAGGTGCTTCTTCAATTTTAGGAGCTATTAATTTTATTACTACAATAATAAATATGAGAGCTCCTAGTTTAAAAATGCATTGAATACCATTATTTGTTTGAGCTATATTTATTACAGCATTTTTATTATTATTATCTTTA	40	19	20	29	27	14	35	26	23	30	20	7	13	9	12	9	7	13	15	9	93	116	13	8	12	13	36	23	9	9	6	13	21	9	21	32	30	17	0	0
OTU_472	Ochrophyta	Phaeophyceae					72.68	Published	CTTAAGTGGAATCGAGGCGCACTCCGGCCCCGCTGTGGACTTCGGTATTTTTAGCCTTCACCTAGCTGGAATGTCCTCCATTCTTGGCGCGATCAACTTTATTGTAACTATTTTCAATATGCGTGCACCCGGTATGCCCCTTTATGTTATGCCCCTTTTCGTATGGAGCGTTCTGATTACTGCATTTTTACTGCTTCTTTCTCTG	27	13	23	5	12	20	14	4	7	15	10	2	1	1	0	1	0	3	0	2	838	27	24	17	19	33	26	6	2	16	10	14	10	2	5	11	3	25	0	0
OTU_473	Rotifera	Monogononta	Ploima	Synchaetidae	Polyarthra		95.24	Published	CCTGTCTGATGCTAAGTATCATTCTGGTATTTCTGTTGATCTTGCTATTTTCAGTCATTTAGCTGGTGTCTCTTCTATTTTAGGTAGAATCAATTTTCTTACTACTATTGTGTGTTCTCGCACTACTAAGCTAATCTCTTTAGATCGTTTACCTTTATTACTATGAGCTATCTCTATTACTGCTATCTTACTTATTACAAGACTT	12	15	2	2	20	22	38	94	36	24	97	36	27	42	278	357	86	59	10	10	0	0	12	17	0	0	2	1	0	1	8	14	128	143	4	3	17	19	0	0
OTU_474	Arthropoda	Insecta					79.1	Published	TTTAAGTAGTATTCCTGCGCACGCGGGCTCTTCGGTTGATTTTGCTATTTTAAGTTTACATTTAGCTGGAGCTTCTTCTATTGCGGGTGCAATAAATTTTATAACTACTATTTGTAATATGCAAGCTAATGGTCTATCTTTCCATCGTTTACCATTATTTGTTTGATCTGTTTTAATTACTGCTGTTTTACTTTTATTATCACTG	60	70	27	26	39	45	32	26	18	33	33	33	20	33	19	14	14	14	18	26	0	0	17	19	47	34	21	36	21	34	37	36	24	31	14	24	33	18	0	0
OTU_475	Ascomycota	Saccharomycetes					81.37	Published	ATTAGCAAGTATTGAATATCATTCTGGAGCAAGTGTAGATTTAGCAATTTTTAGTTTACATTTAGCAGGAATTTCATCAATATTAGGAGCTATGAACTTCATTACAACAATATTAAACATGCGAGCTCCGGGTATGACAATGCATAAATTACCTTTATTTGGTTGAGCTGTATTCTTAACAGCTATTTTATTATTATTATCATTA	0	0	0	0	0	0	0	0	0	0	0	0	0	0	0	0	0	0	0	0	0	0	0	0	0	0	0	0	0	0	0	0	0	0	0	0	0	0	0	0
OTU_476	Bacillariophyta	Bacillariophyceae					84.31	Published	TTTGTCTGGGATTATTGCGCACTCTGGTGGTGCTGTTGATCTTGCAATTTTCAGTCTACACTTATCAGGTGCTGCATCTATTTTAGGAGCAATTAATTTTATTTGTACTATTGTAAATATGCGAACTGAAAGTTTACCGTTTCACAAATTACCACTATTTGTTTGGTCTGTTTTTATTACTGCAATTCTATTGTTACTATCTTTA	14	19	19	15	30	10	36	32	21	40	24	11	34	38	27	30	38	16	27	7	73	56	39	25	45	28	37	16	10	12	13	10	20	25	8	17	28	15	0	0
OTU_477	Rotifera	Monogononta	Ploima				89.42	Published	TCTGGCAGATGCTAAATATCATTCAGGTATTTCTGTTGATTTGGCGATTTTTAGTCTTCATTTAGCTGGAGTTTCTTCTATTTTAGGAAGAATTAATTTTTTAACTACTATTATTTGTTCTCGTACTACAAAATTGATTTCTATGGATCGTTTGTTATTATGAGCAATTTCAGTTACAGCTGTATTGTTAATTACAAGATTA	194	183	284	307	1006	1023	325	392	226	407	451	141	739	774	806	1074	213	188	598	572	61	62	43	29	55	55	751	648	772	959	372	438	141	153	451	529	1174	1467	0	0
OTU_478	Arthropoda	Insecta	Odonata	Calopterygidae	Hetaerina		96.08	Private	TTTATCTGGAAATATTGCTCATTCTGGTCCATCTGTTGATTTAGCTATTTTTAGTTTACATATTGCAGGAGCTTCATCACTTTTAGGTTCAATTAATTTTATTGTTACTATTTTAAATATGCGTGCACGCGGTATGACAATGTATATGTTACCTTTATTTGTTTGAGCTGTTTTAATTACTGCATTTTTATTAGTTTTATCATTA	25	8	24	22	28	25	21	12	17	29	28	9	20	31	12	47	17	8	20	6	218	83	34	47	46	34	35	23	16	24	12	15	42	28	15	22	14	29	0	0
OTU_479	Zygomycota						75.41	Private	TCTATCAGGTGTACAAGCCCACTCAGGTGGTTCAGTTGATCTAGCAATTTTCGCTCTTCACCTTTCAGGTATTAGTTCAATGCTGGGTGCTATGAACATCCTTACAACTATTCTAAACATGCGGGCTCCAGGTATGACACTTCACAAAATGCCACTATTCGTATGGGCTATGCTAATGCAATCAGTTATTATTATTCTAGCTGTT	15	16	15	14	12	13	8	3	1	21	7	4	4	12	7	17	2	5	18	5	126	175	42	28	59	22	38	14	17	19	12	19	24	13	6	9	19	18	0	0
OTU_480	Ochrophyta	Chrysophyceae					79.41	Published	GTTAAGTAGTGTTCAATCTCATTCTGGTCCATCTATTGATTTAGCTATTTTTAGTTTACATTTAAGTGGTGCGGCATCGATTTTAGGAGCTATTAATTTCATTGTTACTGTTATTAATATGAGAGCTCCTGGGATGAAAATGCATTTATTACCATTATATGTATGGTCAGTTTTTGTTACTTCTTTTTTATTAGTATTATCATTA	33	13	8	6	21	31	19	6	7	9	11	9	10	20	12	9	11	7	7	0	64	127	13	21	12	21	20	14	12	11	16	4	14	17	10	11	4	16	0	0
OTU_481	Rotifera	Monogononta					78.61	Private	TTTATCAGATTCTAAGTACCATAGTGGGATTTCTGTAGATTTAGCTATTTTTAGGTTGCATTTAGCAGGTATTTCTTCTATTTTAGGTAGAATTAACTTCCTTACTACTATTGTTGTATCTCGAATGTCTTCTGATATGACTTTAGATCGTCTTCCGCTGTTTTTATGGGCTATTGCTATTACAGCTGTTCTATTAATTGTTAGATTA	3	7	0	0	0	0	0	0	0	0	0	0	0	0	0	0	7	4	0	0	0	0	0	0	8	0	30	32	0	0	8	27	68	60	0	0	44	60	0	0
OTU_482	Arthropoda	Collembola	Entomobryomorpha	Isotomidae	Isotoma	Isotoma anglicana	99.51	Published	TCTTTCTTCAGGTATCGCGCATGCTGGGGCATCTGTGGACTTATCTATTTTTAGTTTACACTTAGCAGGAGCGTCTTCTATTTTAGGGGCTGTAAACTTTATTACAACAATTATTAATATACGAGCCGTTGGAATATCATGAGATCGAACCCCTTTATTTGTGTGGTCAGTATTTTTAACAGCAATTTTACTTTTACTATCACTT	0	1	2	0	0	0	0	2	0	0	0	0	0	0	0	0	2	1	0	0	259	299	30	20	0	0	1	0	13	10	0	1	0	1	13	10	1	1	0	0
OTU_483	Ochrophyta	Phaeophyceae	Ectocarpales				85.29	Published	ATTAAGTAGTGTACAAGCTCATTCAGGTCCATCTGTAGATTTAGCTATTTTTAGTTTACACTTATCTGGTGCTGCTTCTATTTTAGGTTCTATTAACTTTATTACTACTATCTTTAATATGAGAGCACCTGGAATGAGTCTACATCGTATGCCTCTTTTCGTTTGATCTGTATTAATTACATCATTCCTATTATTATTATCTTTA	7	13	8	12	15	13	17	10	15	9	14	7	16	21	6	11	6	13	14	11	100	90	3	3	24	20	17	18	12	8	17	15	24	23	5	4	12	12	0	0
OTU_484	Ascomycota	Leotiomycetes	Leotiomycetes_order_Incertae_sedis				86.27	Published	ATTATCTGGTATACAAAGTCACAGTGGACCTAGTGTAGATCTAGCTATATTTGCTCTACATTTATCAGGTATAAGTAGTCTACTAGGTGCAGTTAATTTCATTACTACTATTTTAAATATGAGAAGCCCTGGTATCAGATTACATAAATTAGCATTATTTGGATGAGCAATCTTAGTTACTGCTGTTTTACTGTTATTATCATTA	6	3	12	7	1	4	16	5	4	8	10	0	5	0	2	0	0	3	1	0	195	369	92	48	18	10	21	15	6	17	15	8	12	19	5	8	21	8	0	0
OTU_485	Ochrophyta	Phaeophyceae					75.49	Published	ATTATCATCAATTCAAGCACATTCAGGGCCATCAGTTGATTTAGCTATTTTCAGCTTACACCTTTCAGGAGCAAGCTCAATTATGGGGTCTATTAACTTCATTGTAACAATTTTCAACATGCGTGCACCAGGAATGTTTATGCATAAAATTCCACTTTTCGTATGAGCAGTTCTTGTAACAGTATTCCTTCTTTTATTATCACTT	6	7	7	3	6	16	10	8	13	11	1	2	9	5	7	4	10	11	6	2	86	118	6	13	7	4	8	9	2	2	2	5	6	7	3	9	3	14	0	0
OTU_486	Heterokontophyta	Oomycota					76.12	Published	ATTATCGAGTATACAAGCACACTCTGGAGCAAGTGTAGATTTAGCTATATTTAGTTTACACTTAGCAGGTATTTCGTCTATATTAGGCGCAATAAACTTTATCTGTACAATACTAAATATGAGAGGAGAAAAAGTATCTATGCACTTAATTCCATTGTTTGTTTGGGCCGTTTTAATTACAGCGGTTTTATTATTGTTATCTTTG	31	19	15	10	9	15	17	18	7	8	15	6	6	8	9	12	8	10	3	8	53	85	22	10	53	18	37	34	12	18	8	13	17	13	7	16	9	11	0	0
OTU_487	Rotifera	Monogononta	Ploima				89.27	Published	TTTGTCAGACTCAAAGTACCACAGAGGTATTTCGGTTGACCTTGCTATTTTTAGACTTCATATTGCTGGTATTTCTTCTATTCTTGGGAGAATTAACTTTCTTACAACTATTATCTGTTCCCGTACAACTAAAATGATCTCTTTAGATCGTATGCCGTTAATGCTTTGGGCACTAGCTGTAACAGCTATTCTTCTTATTACAAGGCTT	0	0	33	2	202	226	0	94	36	0	113	15	0	0	0	0	0	0	0	0	0	0	0	0	0	0	0	0	0	0	0	4	0	0	1	0	84	67	0	0
OTU_488	Rotifera	Monogononta	Ploima	Lecanidae			90.2	Published	TTTGTCAGATTCTAAGTTTCATACAGGTATTTCTGTTGATTTAGCTATTTTTAGACTTCATTTAGCTGGGATTTCTTCAATTTTAGGGAGAATTAATTTTTTAACTACTATTATTTGTTCTCGTACAACAAAAATAATTTCAATAGATCGTCTTCCTTTAATGATTTGGGCTTTAGCTGTCACTGCAGTTTTACTGGTCACTAGTCTT	0	0	0	0	123	175	0	0	0	0	0	0	0	0	0	0	0	0	0	0	0	0	0	0	0	0	0	0	0	0	0	2	0	0	0	0	0	0	0	0
OTU_489	Arthropoda	Insecta					77.27	Private	TTTATCTGGTATTACAGCACATTCTGGTGGTTCTGTTGATCTTGCTATTTTTAGTTTACATTTGTCTGGTGTTTCTTCTATTGCTGGTTCAATAAATTTTATGACCACAATTATCAATATGCGTGTAAAAGGGTTAACTTTATATCGTTTACCTTTATTTATATGATCTGTATTTTTAACAGCCTTTTTATTGGTTTTAACTTTA	0	0	0	0	0	0	8	3	0	0	0	0	0	0	0	0	3	8	0	0	216	622	0	0	11	0	0	0	5	1	0	0	0	0	1	8	0	0	0	0
OTU_490	Annelida	Clitellata	Tubificida	Naididae	Stylaria	Stylaria lacustris	100	Private	TCTATCTAGAAATTTAGCACACGCTGGTCCATCAGTAGATATGGCTATTTTTTCACTTCATTTAGCAGGTGCTTCTTCTATTTTAGGAGCAGTAAATTTTATTACAACAGTAATAAATATACGATGAAATGGGATACGTCTAGAACGAGTACCATTATTTGTATGAGCTGTAACACTTACAGTAATTCTTCTTCTACTATCATTA	2	7	8	9	5	3	2	0	2	7	2	2	2	2	3	0	5	10	6	4	132	176	6	1	12	8	1	6	6	4	4	8	3	14	11	8	4	4	0	0
OTU_491	Annelida	Polychaeta	Spionida	Spionidae			90	Published	GCTATCGAGCGCAACCGCACATTCTGGAGGTTCTGTAGATTTAGCTATTTTTAGTTTACATTTATCTGGTGCGTCTTCTATTTTAGGTGCTATTAATTTTATTTGTACAATTTTTAATATGCGAGTAAAAAGTCTATCTTTTCATAATTTACCGTTGTTTGTATGAGCTGTTTTAATTACTGCTTTTTTATTGTTGTTATCATTG	259	247	200	225	153	186	180	219	149	190	201	130	149	171	175	212	184	254	230	190	44	45	255	233	296	285	258	222	249	280	153	209	209	195	208	221	171	225	0	0
OTU_492	Echinodermata	Crinoidea					77.95	Early-Release	GCTTTCTAGCATCACTGCTCATTCAGGTGGTTCTGTTGATTTAGCTATTTTTAGTTTGCATTTATCTGGTGTTTCATCAATTGCTGGTGCTATTAATTTTATGACTACAATCATAAATATGCGTGTTAAAGGTTTAACTTTATATCGTTTACCTTTATTTATTTGATCTTTATTTTTAACTGCTTTTCTTCTTGTAATGACTTTG	13	6	14	16	27	6	0	3	4	8	9	5	0	0	1	9	2	2	6	13	37	220	0	1	28	9	19	7	6	4	1	8	11	0	4	10	4	5	0	0
OTU_493	Ochrophyta	Raphidophyceae					78.07	Published	TCTAAGTAGCATTCAAGCACACTCAGGACCATCTGTAGACCTTGCAATTTTTAGTCTACATATTTCTGGAGCATCTTCAATTAGGGGAGCTATTAACTTTATCGTAACTATTCTAAATAGGCGCGCACCTGGTCTATTTAGGCATAAAATCCCTCTATTTGTATGAGCTGTACTAATTACAGCATTCCTACTTCTACTTTCTCTT	10	2	11	11	9	6	16	6	7	9	14	5	5	5	4	14	5	7	10	3	59	65	9	3	9	8	19	16	9	8	14	4	21	4	10	7	14	1	0	0
OTU_494	Heterokontophyta	Oomycota	Pythiales	Pythiaceae	Phytophthora	Phytophthora lacustris	100	Published	ATTATCAAGTGTACAAGCACACTCAGGACCTTCAGTAGATTTAGCTATTTTTAGTTTACATCTAACAGGTATTTCGTCAATATTAGGTGCTATTAATTTTATTTCAACTATTTATAATATGAGAGCTCCAGGTTTAAGTTTTCATAGATTACCTTTATTTGTTTGGTCTGTATTAATTACTGCATTTCTTCTATTATTAACATTA	16	16	13	16	9	16	7	25	11	20	21	4	3	4	7	3	7	16	9	2	125	97	71	57	67	29	71	58	21	8	18	24	42	48	9	20	23	34	0	0
OTU_495	Ascomycota	Dothideomycetes	Pleosporales		Shiraia		95.1	Published	ATTATCAGGTATACAAAGTCACAGTGGTCCAAGTGTTGATTTAGCTATATTTGGATTACATCTTTCTGGTATATCTAGTCTTCTTGGAGCCATGAACTTTATGACAACTACCTTTAATATGAGAAGTCCTGGAATAAGATTACATAAATTAATATTATTTGCATGAGCAGTTGTTATTACAGCTGTTTTATTATTATTATCATTA	6	6	13	3	11	2	3	2	2	8	17	0	1	5	3	1	2	13	2	1	201	310	92	69	14	9	27	21	27	30	7	11	51	46	14	16	11	3	0	0
OTU_496	Arthropoda	Insecta	Coleoptera				86.17	Private	ATTATCTGGTATTGAAAGCCATTCAGGAGGTTCAGTAGATTTAGCTATTTTTAGTTTACATTTAGCAGGTGCTTCTTCAATTTTAGGAGCAATTAATTTTATTACTACTGTACTAAATATGAGAATACCTGGTTTAAAAATGCATAAAATTCCTTTATTTGTATGAGctatatttattacagctatattattattattatCTTTA	7	15	5	8	4	5	13	12	12	11	10	10	17	19	6	23	17	8	18	6	227	236	18	21	26	15	9	18	16	5	6	9	23	10	17	9	8	10	0	0
OTU_497	Heterokontophyta	Oomycota	Pythiales	Pythiaceae	Pythium	Pythium flevoense	98.04	Published	TTTATCAAGTGTTCAAGCACACTCAGGACCTTCTGTAGATTTAGCTATTTTTAGTTTACATTTATCAGGTATTTCATCATTATTAGGTGCTATTAATTTCTTATCAACTATTTATAATATGAGAGCTCCAGGTTTAAGTTTCCATAGATTACCTTTATTTGTTTGGTCAGTATTTATTACAGCTTTCTTATTATTATTAACATTA	9	7	5	14	3	6	17	1	4	5	9	6	9	1	5	7	4	5	3	3	148	148	67	66	62	36	44	60	22	24	11	19	21	21	7	1	13	16	0	0
OTU_498	Ascomycota	Leotiomycetes					83.84	Published	ATTATCCGGAATCCAGAGTCATAGTGGGCCAAGTGTTGATTTGGCAATTTTTGCTTTACACTTGTCTGGTATAAGTAGTTTACTTGGAGCTATGAATTTCATAACAACTATTCTTAATATGAGATGTCCAGGTGTAACACTACACAAATTAGCTTTATTTGGATGAGCGGTAGTAGTTACAGCTGTGCTTTTATTATTATCCCTT	7	8	17	24	0	0	5	17	1	18	1	3	0	0	0	0	0	6	0	0	0	0	50	26	20	16	44	33	10	20	33	19	36	35	25	27	26	45	0	0
OTU_499	Ochrophyta	Phaeophyceae					77.11	Published	TTTAAGTAGTGTAGCAAGTCACTCTGGAGGAGCCGTGGATTTAGCTATCTTTAGTCTTCACCTTTCAGGTATAAGTAGTCTTTTAGGTGCTATCAATTTTATAACAACAGTATTTAATATGCGCGGACCTGGTATGACAATGCATCGACTACCTTTATTCGTTTGGTCTGTACTAATTACTGCCTTTTTATTATTGTTGTCATTA	21	12	35	29	45	18	42	19	17	28	24	12	20	33	20	35	7	14	27	17	48	19	46	23	41	23	35	22	22	39	14	26	11	41	35	44	23	19	0	0
OTU_500	Rotifera	Monogononta					77.11	Published	GTTATCTGATTCAAAGTACCATAGAGGTATTTCTGTTGATCTTGCTATCTTTAGACTACACTTGTCAGGTGTTTCCTCTATTTTAGGAAGTATCAACTTTTTAACTACTATCTTAGTTTCTCGTATGACTTCTGTCATAACTTTAGATCGTTTACCTTTGTTCCTGTGGTCTGTGGCTATTACTGCTGTTCTTTTAATTGTTAGGCTT	41	30	0	0	0	0	0	0	0	0	0	0	0	0	17	21	0	0	0	0	0	0	0	0	0	0	0	0	114	80	0	0	0	0	0	0	0	0	0	0
OTU_501	Cryptophyta	Cryptophyceae	Cryptomonadales	Cryptomonadaceae			93.14	Published	CCTTAGCAGTATTTCAGGTCATCCTGGAGGTGCTGTTGATTTAGGTATATTTAGCTTACATGTAGCTGGTGCCTCTAGTATCTTAGGTGCCATCAATTTCATAACAACTATTTTTAATATGAGAGTTCCCGGAATGACAATGCATAGAATACCCTTATTTGTCTGGGCCGTTTTAATAACTGCTTTTTTACTTCTTCTTTCTTTA	23	28	24	21	14	20	22	25	21	18	19	9	10	13	25	28	21	20	9	8	99	70	56	52	83	64	29	27	29	62	12	23	42	27	15	28	22	34	0	0
OTU_502	Ochrophyta	Phaeophyceae					79.8	Early-Release	ATTATCAGGAATTCAAGCACATTCAGGGCCTTCTGTAGATTTAGCTATTTTTAGCTTACATTTATCAGGAGCAAGTTCAATTATGGGATCAATTAATTTTATTGTAACTATTTTTAACATGCGTGCACCTGGAATGTTTATGCATAAACTTCCTCTTTTTGTTTGAGCTGTTCTTATTACAGTATTCTTATTATTACTTTCACTT	1	3	2	8	11	12	8	8	7	5	7	2	3	6	4	1	2	2	1	4	19	80	8	8	14	5	8	10	10	5	13	2	11	3	1	9	4	2	0	0
OTU_503	Ochrophyta	Phaeophyceae					79.06	Early-Release	TTTAAGTTCTGTTCAAGCACATTCAGGGCCTTCGGTATGTCTTGCTATTTTTTCATTACATCTTGCAGGTACGTCTTCAATTCTAGGAGCTATTAACTTTATTACCACGATTTTTAACATGCGAGCCCCTGGAATGAGTATGCATAGATTACCACTACTAGTATGGGCTGTTTTAATTACTGCATTTCTTCTTCTACTTTCATTA	14	7	9	11	13	7	25	9	10	11	8	0	4	11	11	11	9	10	8	1	132	96	18	19	18	19	23	17	13	5	6	8	10	11	17	12	2	0	0	0
OTU_504	Rhodophyta	Bangiophyceae					79.41	Published	TTTATCAAGTATATTAGCACACTCAGGACCTTCAGTAGATTTAGCTATTTTTAGTTTACACATAGCTGGGGCATCATCTATTATAGGTTCAATTAATTTTATTGTAACTATTTTTAATATGAGAGCTGGTGGTATTTCAATGCATAAATTACCATTATTTTGCTGATCAATTCTTATTACAGCAATATTATTACTATTATCCTTA	12	12	13	6	7	8	15	10	12	5	14	3	1	6	11	10	3	1	9	3	273	28	21	1	42	32	24	14	1	10	4	3	9	14	4	11	13	11	0	0
OTU_505	Rhodophyta	Florideophyceae					80.39	Private	TTTAAGTAGTATTCAAAGCCATTCTTCTGCTGCTGTCGATCTTGCTATTTTTAGTTTACACTTAGCTGGTATTTCTTCTCTTTTAGGTGCTATTAATTTTATTACAACTGTTTTAAATATGCGTGCTCCTGGTTTAGGTATGCATCAAATACCTTTATTTGTTTGAGCTGtttttattacagcttttcttttacttttttCATTA	0	0	0	0	0	0	0	0	0	0	0	0	0	0	0	0	0	0	0	0	0	0	0	0	0	0	0	0	0	0	0	0	0	0	0	0	0	0	0	0
OTU_506	Porifera	Demospongiae					80.88	Published	ATTATCAGGAATTGAATCACATTCAGGAGGTTCAATAGATTTAGCAATTTTCAGTTTACATTTAGCTGGGGTATCATCATTATTAGGAGCTATGAATTTTATTACAACAGTAATAAATATGAGAACTCCTGGTTTAAAAATGCATAGAATTCCATTATTTGTATGAGCTATTTTCATTACAGCTTTTTTATTACTTTTATCATTA	9	12	14	12	31	13	23	12	22	21	36	9	9	23	14	25	13	14	26	2	163	84	15	21	22	12	29	15	20	23	14	14	28	25	15	10	10	7	0	0
OTU_507	Arthropoda	Insecta					75	Private	ATTAAGTTCCATTTTAGCCCATTCTGGCTGTGCCGTAGATTTAGCTATTTTTAGTTTACATATAGCAGGTGCTTCTTCTATAGCGGGGGCTATTAATTTCATCGTTACTATTATAAATATGCGTTGCCCTGGAATGTATTTTCGTCGTTTACCGTTGTTCGTTTGATCTGTATTTATAACAGCAATTTTGTTATTGCTTTCATTA	13	12	14	24	32	18	36	15	5	36	18	3	0	0	4	3	1	7	4	5	148	44	4	2	2	5	22	9	9	4	0	0	14	4	35	21	33	26	0	0
OTU_508	Porifera	Demospongiae					78.92	Published	ATTATCAAATATTGAATATCATTCGGGTGGTTCTGTTGATTTAGCAATATTTAGTTTACATATAGCTGGTGCGTCTTCTATATTAGGTGCTATGAATTTTATTACAACAGTTTTAAATATGAGAGTACCTGGTATGAAAATGCACAAAATCACATTATTTACTTGAGCAGTATTTATAACTGCAATATTATTATTATTATCTTTA	5	7	5	6	6	4	14	5	12	14	9	4	4	4	5	7	14	12	4	2	114	136	5	5	24	8	12	11	7	5	7	4	10	2	5	9	8	11	0	0
OTU_509	Ascomycota	Leotiomycetes	Leotiomycetes_order_Incertae_sedis	Leotiomycetes_family_incertae_sedis			91.67	Published	GTTAAGTGGAGTACAAAGTCACAGTGGGCCAAGTGTTGATTTAGCTATCTTTGCTTTACATCTATCTGGTATTAGTAGTTTATTAGGTGCAGTTAACTTTATAACAACAATACTTAATATGAGAAGTCCAGGTATAAGATTACACAAATTAGCCTTATTTGGATGAGCAGTAGTTGTTACAGCTGTATTATTATTATTATCATTA	30	13	28	28	15	21	45	11	25	44	12	8	29	38	59	53	13	15	25	21	180	64	42	18	23	6	47	22	19	16	10	7	18	20	5	24	24	38	0	0
OTU_510	Heterokontophyta	Oomycota	Saprolegniales	Saprolegniaceae	Achlya	Achlya bisexualis	99.02	Published	ATTATCTAGCGTACAAGCACATTCAGGTCCTTCTGTTGATTTAGCTATTTTTAGTTTACATTTAGCAGGTATTTCGTCATTATTAGGTTCAATAAATTTTATTACAACTATTTATAATATGAGATCTCCAGGTTTAACTTTTCATAAACTACCTTTATTTGTATGGTCGGTATTTATTACTGCTTTTTTACTATTATTAAGTTTA	16	15	18	14	2	21	12	14	5	0	10	0	2	5	4	2	1	1	4	4	63	78	84	54	20	34	34	28	6	10	12	13	15	21	6	15	13	13	0	0
OTU_511	Heterokontophyta	Oomycota	Pythiales	Pythiaceae	Pythium	Pythium sp. CFJS-2019aa	100	Published	ATTGTCAAGTGTACAAGCACACTCAGGTCCTTCCGTTGATTTAGCTATTTTTAGTTTACATTTATCAGGTATTTCTTCATTATTAGGTGCAATTAATTTTTTATCAACTATATATAATATGAGGGCTCCTGGTTTAAGTTTTCATAGATTACCTTTATTCGTATGGGCTATTTTTATTACAGCTTTTTTACTTTTATTAACTTTA	11	10	15	13	15	15	9	7	13	13	14	4	5	4	12	4	10	11	3	6	88	242	48	27	47	36	46	45	14	12	4	11	23	11	7	21	27	8	0	0
OTU_512	Rotifera	Monogononta					80.79	Published	CCTTTCTGATTCTAAATACCACTCTGGTATTTCTGTTGATTTAGCTATTTTTAGTTTACATCTTGCAGGTATTTCTTCAATTCTAGGTAGAATTAATTTTCTTACTACTATTCTTTGTTCTCGCACTGCTAAATTAATTTCGTTAGATCGTTTACCCCTTTTTTTATGAGCAGTTGCTATTACAGCTGTTCTTTTAATCACAAGACTT	0	0	103	119	0	0	0	0	0	0	0	0	0	0	0	0	0	0	0	0	0	0	0	0	0	0	0	0	0	0	0	0	0	0	0	0	0	0	0	0
OTU_513	Ochrophyta	Raphidophyceae					77.78	Published	GTTAAGTGGTATTGATGCACATTCAGGCCCTGCTGTTGATTTAGCTATATTCAGTTTACATTTATCAGGAGCATCTTCAATTGCAGGAGCAATTAATTTTATAGTAACTATAGTTAACATGAGAGCTCATGGGTTAAAATTTAATATTTTACCATTATTTGGTTGATCAGTTCTTGTCACAGCATTTTTACTATTATTATCATTA	31	19	3	7	26	4	43	1	8	29	7	6	7	5	6	4	8	8	5	20	70	201	8	7	28	13	0	15	8	12	7	3	22	8	5	6	8	4	0	0
OTU_514	Cnidaria	Hydrozoa					80.39	Published	ATTATCAGGAATTTTAGCACATTCAGGGCCTTCAGTAGATTTAGCGATTTTTAGTTTACACTTATCAGGAGCAAGTTCTATAATGGGGTCTATTAATTTTATAGTTACTATTTTTAATATGAGAACACCAGGATTGTTTATGCATAAATTACCTTTATTTGTGTGAGCTGTTTTAGTAACAACATTTTTATTATTATTATCTTTA	1	0	1	2	3	9	4	0	0	9	3	0	1	6	6	10	4	2	5	8	53	50	4	15	21	11	11	11	5	9	5	1	5	9	2	9	4	4	0	0
OTU_515	Arthropoda	Insecta	Lepidoptera				86.41	Published	TTTATCGATTTTAGAGGATAAGGGTGTAGATTTTGCTATTTTTAGTTTACATTTAGCCGGTATTTCTTCTTCATTAGGTGCTATTAATTTTATTACAACAATAATAAATATGCGTCATCCAGGATTACATTTACATATAACACCTTTATTTGCTTGAGCTGTTTTAGTAACAGCTTTTTTATTATTATTATCTTTA	40	28	28	37	35	25	5	14	3	15	11	4	8	10	2	24	11	11	15	5	224	189	7	0	6	6	23	7	11	9	12	2	49	37	30	24	32	30	0	0
OTU_516	Bacillariophyta	Mediophyceae					77.94	Published	TTTATCTAGTATTACAGCACACTCTGGTGGAGCAGTTGATTTAGCTATATTTAGTCTACACCTGTCAGGTGCTTCATCGATTCTAGGTGCTATTAACTTTATTTGTACAATATTTAATATGCGAGCTAAAGGAATTTCATTTCACCATTTACCTCTTTTCGTATGGGCAGTTTTAATTACCGCATTTCTTTTATTACTATCATTA	14	2	20	20	12	16	19	11	27	15	20	10	14	12	14	26	16	12	8	7	15	20	27	12	29	7	13	12	12	15	15	16	40	21	30	12	20	22	0	0
OTU_517	Arthropoda	Copepoda					84.62	Private	TCTGAGAAGAAACATTTCACATTCTGGTGCGTCTGTAGATTATGCTATTTTTTCTTTGCATTTGGCAGGGGTTTCTTCGATTTTAGGTGCTGTAAATTTTATTAGGACTTTGGGTAACATACGAACTTTTGGAATGTTTTTAGATCGCATACCTCTTTTTGCTTGAGCCGTATTAATCACTGCTATTCTCTTATTGCTTTCATTG	0	0	173	185	0	0	0	0	0	0	0	0	0	0	0	0	0	0	0	0	0	0	0	0	0	0	0	0	0	0	0	0	0	0	0	0	0	0	0	0
OTU_518	Bacillariophyta	Mediophyceae	Thalassiosirales				85.78	Published	TCTGTCAAGTGCAACAGCTCATTCTGGAGGCTCTGTAGATTTGGCTATCTTTAGTTTACACCTTTCTGGTGCTTCTTCTATTTTAGGGGCTATTAATTTTATTTGTACCATTTTTAATATGCGAGTAAAAAGTTTATCTTTTCACAATCTACCATTATTTGTTTGATCTGTGTTGATTACAGCATTTTTGTTGCTTCTATCTTTA	6	8	16	12	17	14	21	13	11	9	6	6	17	14	16	9	11	17	14	4	22	20	20	16	24	14	18	31	8	10	19	14	14	5	14	13	17	12	0	0
OTU_519	Cnidaria	Hydrozoa	Anthoathecata	Hydridae	Hydra	Hydra vulgaris	100	Published	ATTATCTGGGCCTTTAGCTCATTCAGGAGGATCTGTAGATTTAGCTATTTTTAGTCTTCATTGTGCTGGATTTTCTTCCATTGCAGGAGCAATTAATTTTATTACAACTATTTTTAATATGAGAACACCGGGTTTAACATTTGACAAACTTCCTTTGTTTGTGTGATCAGTGTTAATAACAGCATTTTTATTACTCCTTTCTTTA	14	13	6	9	3	2	22	7	8	13	11	2	11	11	18	5	6	7	6	14	374	157	0	7	36	16	30	16	9	12	7	8	23	13	10	9	13	6	0	0
OTU_520	Rotifera	Monogononta	Ploima	Synchaetidae	Synchaeta		97.35	Published	ACTATCTGATTCTAAATTTCATTCTGGAATTTCTGTTGATCTTGCAATTTTTAGTTTACATATTGCCGGTATTTCATCAATCTTAGGTAGAATTAATTTTATAACTACTATTGTTTGTTCTCGTACTACAAAGATAGTAAGAATAGATCGTCTACCTTTAATAATTTGATCATTAGGAGTAACTGCTTTTCTTTTAGTAACTACTTTA	0	0	1	1	4	16	0	0	1	0	0	0	0	0	0	0	0	2	0	0	0	0	0	0	0	0	0	0	1	3	1	2	13	6	4	3	0	0	0	0
OTU_521	Rotifera	Monogononta	Ploima	Synchaetidae	Synchaeta		95.38	Published	ATTATCTGATTCTAAATTTCATTCTGGTATTTCTGTTGATCTTGCAATTTTTAGTCTTCATATTGCTGGTATTTCATCTATTCTAGGTAGGATTAATTTTATAACTACTATTGTTTGTTCTCGTACTACAAAAATAGTGAGAATAGACCGTCTTCCTTTAATAATTTGATCATTAGGAGTGACAGCATTTCTTTTAGTAACGACTTTA	0	0	0	0	0	0	0	0	0	0	0	0	0	0	0	0	0	0	16	13	0	0	0	0	0	0	29	13	0	0	1	15	0	0	4	8	0	0	0	0
OTU_522	Heterokontophyta	Oomycota					75.37	Published	ATTAAGTGGCATTGACGCACACTCAGGACCTGCGGTTGATTTAGCAATATTTAGTTTACATTTATCTGGCGCTTCGTCAATTGCAGGTGCGATTAACTTTATAGTAACTATTGTTAACATGAGGGCTCATGGGTTAAAGTTTAATATATTACCGTTGTTTGGGTGATCAGTTCTTGTCACCGCATTCCTGTTATTATTATCATTA	14	8	18	1	4	6	9	5	5	4	10	2	1	1	4	1	1	1	5	2	6	101	0	0	0	0	10	16	6	5	0	5	2	3	7	1	5	7	0	0
OTU_523	Bacillariophyta	Bacillariophyceae	Naviculales				85.29	Published	TTTATCAAGTATTACTGCTCACTCAGGAGGATCTGTAGATTTAGCAATTTTCAGTCTTCATTTATCTGGAGCTTCTTCTATTTTAGGTGCAATTAACTTTATTTGTACCATTACTAACATGCGAACCAAAAATTTTGCTTTCCATAGATTACCTCTATTTGTTTGGGCAATTTTTATTACAGCGTTTTTATTATTACTTTCATTA	22	6	18	11	8	2	25	9	9	19	19	6	9	7	39	37	11	12	30	13	41	103	19	15	25	24	12	14	12	12	14	17	19	18	6	13	7	15	0	0
OTU_524	Arthropoda	Insecta	Lepidoptera				87.64	Published	GTTAAGTAGTATACATAGTCATTCATCTGCTGCTGTGGATTTAGCAATCTTCAGTTTACATTTAGCTGGTATTTCTTCTATTTTAGGTGCTTTAAATTTTATTACAACTATTTTTAATATGCGTGCTCCTGGTTTAGGTATGCATCAATTACCTCTTTTTGTTTGAGCTGTATTAATCACAGCTTTTTTATTAATTTTATCTTTA	0	0	0	0	0	0	0	0	0	0	0	0	0	0	0	0	0	0	0	0	0	0	0	0	0	0	0	0	0	0	0	0	0	0	0	0	0	0	0	0
OTU_525	Arthropoda	Insecta	Diptera	Chironomidae	Tanytarsus	Tanytarsus brundini	98.53	Early-Release	TTATCTTCAAGAATTGCCCACAGAGGTGCTTCTGTAGATTTAGCTATTTTTTCTCTTCATTTAGCAGGGATTTCTTCTATTTTAGGATCAGTAAATTTTATTACAACTGCTATTAATATGCGGGCTAATGGAATTACATTAGATCGAATACCCCTGTTTGTCTGATCAGTAGTAATTACAACTGTGTTACTACTTTTATCACTG	0	6	0	0	0	10	3	0	0	4	4	0	2	0	1	11	6	0	0	0	5	388	9	10	0	8	3	0	6	13	3	2	24	2	1	1	50	43	0	0
OTU_526	Placozoa						80.1	Published	TATCGCATCTATTGAGTACCACTCTGGAGGGTCTGTAGATTTAGCTATCTTTAGCCTACATTTAGCAGGGGTATCATCAATATTAGGGGCTATGAACTTTATTACAACTATTTTAAATATGCGAACTCCTGGTATGACTATGCATAGATTACCATTATTTGTATGAGCTGTATTTATTACGGCAATATTATTAATACTATCTCTA	0	0	0	0	0	0	0	0	0	0	0	0	0	0	0	0	0	0	0	0	0	0	0	0	0	0	0	0	0	0	0	0	0	0	0	0	0	0	0	0
OTU_527	Bacillariophyta	Mediophyceae	Stephanodiscales				85.57	Published	GCTATCGAGCGCAACCGCACATTCTGGAGGTTCTGTAGATTTAGCTATTTTTAGCCTGCATTTATCAGGCGCATCTTCTATATTAGGAGCTATTAATTTCATTTGTACAATCTTCAATATGCGAGTAAAAAGTTTTATCTTTTCAAATTTACCATTATTTGTGTGGTCTGTTTTAATTACTGCTTTTTTATTGTTGTTATCATTG	1	1	1	2	2	3	1	0	1	2	3	1	1	2	1	8	0	3	1	1	0	3	0	3	4	1	0	1	2	1	0	1	1	2	1	1	0	2	0	0
OTU_528	Bacillariophyta	Bacillariophyceae					79.41	Published	TCTTTCGGGAATAACAGCACATTCTGGCGGTGCAGTTGATTTGGCGATTTTTAGCTTACATTTGTCTGGGGCATCTTCTATATTAGGAGCAATTAATTTCATTTGCACAATAGTCAACATGAGAACGGATAGTTTGCCTTTTCATAAATTACCTTTATTTGTTTGGTCTGTTTTAATAACTGCTGTATTACTATTGTTGTCTTTA	67	56	28	45	16	48	22	15	9	37	17	12	2	6	0	18	9	7	15	4	33	44	4	7	14	25	38	33	26	33	10	7	52	27	26	22	78	55	0	0
OTU_529	Ochrophyta	Phaeophyceae					77.83	Published	ATTATCAGGAATCCAAGCACACTCAGGACCTTCTGTAGATTTAGCTATTTTTAGCTTACATATTTCAGGAGCAAGTTCTATTATGGGTTCTATTAATTTTATTGTTACAATTTTTAATATGAGAGCGCCAGGAATGTTTATGTACAAAATGCCACTTTTTGTATGAGCACTTCTTATTACAGTTTTCTTATTATTACTTTCTCTT	4	0	2	3	7	5	3	2	0	4	1	0	1	3	4	2	1	0	2	0	43	50	1	10	5	4	5	4	4	1	1	4	1	0	1	1	4	2	0	0
OTU_530	Bacillariophyta	Mediophyceae	Stephanodiscales				88.56	Published	GCTATCGAGCGCAACCGCACATTCTGGAGGTTCTGTAGATTTAGCTATTTTTAGCCTGCATTTATCAGGCGCATCTTCTATATTAGGAGCTATTAATTTCATTTGTACTATTTTCAATATGCGAGTAAAAAGTTTATCTTTTCATAATCTTCCTTTATTTGTATGGTCAGTTTTAATTACTGCTTTTTTATTGTTGTTATCATTG	1042	1245	1056	1435	869	999	1128	1262	805	1558	1022	1508	862	994	1242	1451	1120	1470	1322	1175	420	540	1193	1095	1376	1601	1338	1163	872	1269	793	1034	945	989	784	938	627	1125	0	0
OTU_531	Ascomycota	Sordariomycetes	Hypocreales				87.75	Published	TTTGTCAGGATTACAAAGTCACAGTGGACCTAGTGTGGACTTAGCTATTTTTGCTTTACATTTATCAGGTGTAAGTAGTTTATTAGGAGCTATTAACTTTATAACTACTATAGCAAATATGAGAACACCAGGTATAAGATTACACAATTTATCCTTATTTGGATGAGCTGTTATTATAACAGCTGTTTTATTATTATTAACATTA	14	8	3	2	3	2	6	4	3	9	3	0	1	1	0	2	1	8	2	2	135	270	42	35	21	23	12	6	5	7	1	2	3	9	15	12	8	10	0	0
OTU_532	Rotifera	Monogononta	Ploima	Synchaetidae	Polyarthra		97.41	Published	TCTGGCAGATGCTAAATATCATTCAGGTATTTCTGTTGATTTGGCGATTTTTAGTCTTCATTTAGCTGGAGTTTCTTCTATTTTAGGAAGAATTAATTTTTTTAACTTATTATTTGTTCTCGTACTACAAAATTGATTTCTATGGATCGTTTACCTTTGTTATTATGAGCAATTTCAGTTACAGCTGTATTGTTAATTACAAGATTA	195	204	230	311	905	925	403	368	198	393	376	148	719	783	727	919	186	153	626	553	78	131	45	24	80	54	711	656	694	746	399	469	145	114	365	417	1067	1361	0	0
OTU_533	Basidiomycota	Exobasidiomycetes	Microstromatales				88.38	Published	ACTATCCTCACTACAAAGCCACTCAGGTGGATCAGTTGATCTAGCTATTTTTAGTCTACATCTAGCAGGAATTAGTTCAATGCTTGGTGCTATGAACTTTATTACTACTATCCTAAATATGCGAAACCCAGGAATGACACTACATAAACTACCACTATTTGTATGGGCTATTTTTATTACTGCTATTCTACTTCTACTAAGTCTA	6	1	6	8	10	2	0	0	0	1	0	2	2	0	2	4	0	1	2	1	51	9	17	46	7	8	50	65	12	11	15	6	29	20	11	6	10	7	0	0
OTU_534	Arthropoda	Insecta	Odonata				88.73	Private	TTTATCAGGAAATATTGCACATTCAGGACCCGCGGTTGATTTAGCAATTTTTAGTTTACATATTTCAGGTGCATCGTCAATTTTGGGATCAATTAATTTTATTATTACAATTACAAATATGCGTGCACGTGGAATGACAATGTATATGTTACCTTTATTTGTATGATCTGTTTTAATTACTGCATTTTTACTTGTTTTATCATTA	9	14	8	8	25	16	13	7	12	15	7	4	1	15	8	8	5	10	14	11	65	36	13	14	21	20	33	14	13	13	10	15	9	16	6	3	6	13	0	0
OTU_535	Heterokontophyta	Oomycota					78.92	Published	ATTATCAGGAATTGAATCACATTCAGGAGGTTCAATAGACTTAGCAATTTTTAGTTTACATTTAGCTGGAGTATCTTCGTTATTAGGTGCTATGAATTTTATTACAACAGTGATAAATATGAGAACTCCTGGTTTAAAAATGCATAGAATTCCATTATTTGTATGAGCTATCTTTATTACAGCCTTCTTATTACTTTTATCATTA	20	3	16	19	8	9	20	16	17	12	17	9	6	6	21	26	21	8	11	10	68	91	22	11	24	26	16	13	22	7	9	11	10	36	16	13	42	8	0	0
OTU_536	Ochrophyta	Phaeophyceae	Ectocarpales				86.27	Private	TTTGAGTGGAATTCAATCACACTCAGGTCCTTCTGTTGATTTGGCGATTTTTAGTCTTCATTTATCTGGAGCAGGATCAATTTTGGGAGCTATTAATTTTATTACTACTATTTTTAATATGAGAGCACCTGGAATGACTATGCATAGATTACCTCTTTTCGTTTGGTCTGTGTTAATTACTGCGTTTTTATTGTTAATTTCGCTT	16	8	17	8	36	31	23	12	6	16	13	4	17	20	13	20	5	13	16	8	71	38	37	29	54	24	26	30	28	38	23	12	13	21	11	19	8	23	0	0
OTU_537	Cryptophyta	Cryptophyceae	Cryptomonadales	Cryptomonadaceae			91.04	Published	CCTTAGTAGTATTTCAGGTCATCCTGGTGGTGCTGTTGACTTAGGTATATTCAGTTTACACGTAGCTGGTGCTTCTAGTATTCTAGGCGCTATTAACTTCATAACGACTATTTTTAATATGAGAGTTCCGGGTATGACGATGCATAGAATACCTCTTTTTGTTTGGGCTGTCCTGATAACTGCTTTTTTGCTTCTTCTTTCTTTG	5	11	12	21	5	15	12	6	23	13	6	2	4	6	4	17	0	5	6	5	72	137	33	18	25	39	21	24	14	13	10	5	19	16	5	12	13	7	0	0
OTU_538	Heterokontophyta	Oomycota	Pythiales	Pythiaceae	Pythium		96.57	Published	ATTATCAAGTGTTCAAGCACACTCAGGACCTTCAGTAGATTTAGCTATTTTTAGTTTACATTTATCAGGTATTTCTTCATTATTAGGTGCTATTAATTTCTTATCAACAATATATAATATGAGAGCTCCAGGTTTAAGTTTCCATAGATTACCTTTATTCGTATGGTCAGTATTTATTACAGCTTTTTTATTATTATTAACATTA	14	5	12	22	16	22	32	13	6	20	23	6	9	9	18	8	13	14	2	14	67	120	41	31	38	24	43	29	13	20	8	8	32	13	8	22	10	23	0	0
OTU_539	Cnidaria	Hydrozoa					77.94	Published	ATTATCTGGAAATATCGCTCATTCAGGACCTTCAGTAGATATAGCAATATTTAGTTTACATATAGCTGGTATAGCTTCTATAACTGGATCTATTAATTTTATGTGCACAATAATGAATATGCGTTTGCCAGGTTTATATATGTATAAATTACCATTATTTCCTTGATCAATATATATAACTTCTGTTTTATTATTATTATCTTTA	4	7	6	7	18	14	0	9	16	4	14	10	14	12	1	12	4	4	5	9	0	0	8	14	33	8	32	53	3	1	23	9	15	7	7	8	53	57	0	0
OTU_540	Rotifera	Monogononta	Ploima	Brachionidae	Brachionus		97.35	Published	CCTTTCTGACTCTACCTATAGGGGTGTTTCTGTTGATCTTGCTATTTTTAGTTTACATCTTTCTGGTGTTTCTTCAATTTTAGGTAGAATTAACTTTTTAACTACTATTATTTGTTCACGCACTACTAAAAAGTATTTCTTTGGATCGTCTTCCTCTTATGTTATGAGCTCTTGCTGTTACGGCTATTCTTTTAATTACTAGACTA	516	331	908	919	1421	1526	298	595	242	455	611	142	378	483	571	677	776	672	515	503	1	0	52	29	66	67	466	417	362	358	1241	1427	1360	1595	731	726	1459	1565	0	0
OTU_541	Annelida	Clitellata					56	Published	CCTTTCTGACTCTACCTATCATAGGGGTGTTTCTGTTGATCTTGCTATTTTTTAGTTACATCTTTCTGGTGTTTCTTCAATTTTAGGTAGAATTAACTTTTTAACTACTATTATTTGTTCACGCACTACTAAAAGTATTTCTTTGGATCGTCTTCCTCTTATGTTATGAGCTCTTGCTGTTACGGCTATTCTTTTAATTACTAACTA	29	44	44	62	64	87	38	33	11	50	41	13	30	44	30	36	16	17	25	22	0	0	0	3	1	1	3	6	8	6	66	69	55	76	41	35	75	70	0	0
OTU_542	Arthropoda	Insecta	Lepidoptera				87.5	Private	ATTAAGTGGATCATTAGCACATAGTGGTGCTTCTGTAGATTTAGCTATTGCTAGTTTACATTTAGCTGGTGTATCTTCAATATTAGGAGCAATTAATTTTATTACTACTATAATGAATATGAGAACAAGGGGTATGTATTTTGAAAGAACGCCTTTGTTTGTATGAACTGTTCTAGTAACAGCATTTTTATTAGTAACAACATTA	4	6	1	14	8	2	8	8	6	2	5	0	7	7	3	5	1	11	8	4	68	10	4	10	32	14	12	12	9	10	6	6	9	5	3	13	0	6	0	0
OTU_543	Ascomycota	Leotiomycetes	Leotiomycetes_order_Incertae_sedis	Leotiomycetes_family_incertae_sedis			90.2	Published	ATTATCAGGAATACAAAGTCATAGTGGACCAAGTGTGGATTTAGCAATATTTGCTTTACACTTATCAGGTATTAGTAGTTTATTAGGTTCAATAAACTTTATAACTACAATACTAAATATGAGAAGTCCAGGTATAAGATTACATAAATTAGCACTATTTGGATGAGCTGTAATAGTAACAGCAGTATTATTATTATTATCATTA	12	18	23	14	10	15	27	16	15	38	23	11	15	11	17	16	6	10	16	7	44	111	46	20	88	61	25	36	15	12	14	12	43	18	13	26	14	24	0	0
OTU_544	Ochrophyta	Raphidophyceae					80.34	Published	ATTAGCTAGCATCCAATCTCATTCTGGACCTTCTGTAGATTTAGCAATTTTTAGTTTACATTTAGCAGGTGCATCTTCTATTTTAGGTGCAATTAACTTTATTGTAACTATTTTAAATATGAGATGTCCTGGAATGTTTATGCATAAAATTCCATTATATGCATGAGCCGTATTTATTACTGCATTTTTATTATTATTTTCTATG	13	9	11	6	10	9	4	12	7	5	8	2	0	2	8	3	3	16	3	7	40	386	8	21	3	7	5	10	5	6	2	8	10	4	6	13	15	10	0	0
OTU_545	Arthropoda	Insecta					74.88	Published	TTTATCTGACTCATTATATCATTTAGGTGCTGCAGTAGATTTATCTATTTTAAGTTTACATATTGCTGGTATCTCTTCTTTAATGGGTGCAATTAATTTAATTGTAACTATTATAAATATTAGATCCCCAGGATTAACTTTTGAAAGATTACCATTATTTGTTTGGGCTATCTTTATTACTGCATGGTTATTAGTATTATCTTTA	8	12	15	22	17	22	23	18	10	13	6	5	11	25	9	25	16	8	18	13	58	148	19	29	41	25	25	14	18	32	15	11	18	13	15	15	15	11	0	0
OTU_546	Heterokontophyta	Oomycota					78.43	Published	ATTATCATCAATACAAGCTCACTCAGGTGGGGCAGTTGATTTAGCTATCTTCAGCCTACACTTATCAGGTATTTCATCATTACTAGGATCTATCAACTTTATTACAACAGTGATAAATATGAGAGCACCTGGAGTGGGATTTGCTCAATTACCATTATTTGTTTGGTCTGTATTCTTTACAGCTTTCTTATTATTATTATCATTA	0	0	0	0	0	0	0	0	0	0	0	0	0	0	0	0	0	0	0	0	0	0	0	0	0	0	0	0	0	0	0	0	0	0	0	0	0	0	0	0
OTU_547	Cryptophyta	Cryptophyceae					81.37	Published	TTTAAGTAGTATCTCAGGACATCCTGGCGGGGCTGTAGACTTAGGTATTTTTAGTTTACACGTTGCTGGTGCCTCTAGTATATTAGGTTCAATTAATTTTATTACTACTATTTTTAATATGAGAGCTCCAGGTATGACTATGCATAGAATACCTTTGTTTGCTTGGTCTATGCTCATAACTGCTTTTTTACTTTTGTTATCTTTA	12	5	14	7	7	2	5	8	10	7	6	2	3	2	1	7	4	3	4	2	36	39	22	19	40	15	14	18	9	9	8	2	18	9	5	16	11	24	0	0
OTU_548	Ochrophyta	Raphidophyceae					82.91	Published	CTTAAGTAGTATTTTAGCACATTCAGGTCCTGCAGTTGATTTAGCAATTTTTAGTTTACACTTATCCGGAGCTGCGTCTATTTTAGGGGCAATTAATTTTATTTCAACTATTTTTAATATGCGTGCACCAGGAATGTATTTTCACAGAATGCCACTTTTTGTATGGGCTGTTTTGATCACTGCCTTTTTATTATTGCTTTCATTA	7	12	2	9	17	14	18	18	12	13	9	6	3	18	6	11	12	12	7	10	82	73	12	15	29	25	19	13	6	11	8	10	21	12	10	5	21	12	0	0
OTU_549	Arthropoda	Insecta	Lepidoptera				87.21	Published	ATTATCTGGTATTGAAAGTCATTCAGGAGGATCTGTAGATTTAGCAATATTTAGTTTACATTTAGCTGGAGCTTCTTCAATTTTAGGAGCTATTAATTTTATTACTACTGTTATAAATATGCGTTTACCTAATTTAAAAATGCATAAAATTCCTTTATTTGTTTGAGCAATATTTATTACTGCAATTTTATTATTATTATCATTG	6	10	7	13	5	30	13	8	16	8	13	7	19	11	17	34	25	28	4	5	77	71	14	13	17	7	13	16	5	19	15	11	29	26	13	10	7	13	0	0
OTU_550	Arthropoda	Insecta	Lepidoptera				87.64	Private	TTTAGCAAGTATTCAAGCACACTCTGGAGCTTCAGTAGATTTAGCTATTTTTAGTTTACATTTAGCAGGTATTTCATCTATTTTAGGTGCTGTTAACTTTATTACAACAATTTTAAATATGAGACCTGAAAAAATGAGTATGCATTTATTACCATTATTTGTTTGGGCAGTTTTAATTACAGCTGTTTTATTATTATTATCATTA	7	12	10	3	6	7	14	4	5	9	5	1	5	1	4	2	12	6	6	5	69	127	12	15	18	14	25	9	14	12	3	9	11	11	8	6	3	3	0	0
OTU_551	Rotifera	Monogononta	Ploima	Synchaetidae			93.23	Published	ATTATCTTCTAAATTTCATTCTGGTACTTCTGTTGATTTAGCTATTTTCAGTTTACATTTAGCTGGTATTTCTTCTATTTTAGGTAGTATTAATTTTATAACTACTATTATTTGTTCTCGTACAACAAAGATAATTAGTATAGATCGTTTACCACTAATGTTATGATCATTAGGTGTTACTGCCTTTTTATTACTAACTACTTTG	38	32	55	68	197	186	56	60	39	61	73	28	116	148	27	19	129	134	121	161	333	432	5	11	1	1	21	15	53	63	129	134	255	226	133	123	89	91	0	0
OTU_552	Heterokontophyta	Oomycota					79.8	Published	ACTTGCTAGCATAGAATATCACTCAGGGGGTTCTGTTGATTTAGCTATTTTTAGTTTACATTTAGCTGGTATTAGCTCAATTTTAGGTGCTTCTAATTTTATTACAACTATCTTAAATATGAGAGCTCCAGGTATGACTCTACATAGATTACCTCTATTTGTATGAGCTGTACTAATTACAGCTGTACTATTATTAATTTCTTTA	7	6	2	10	13	5	2	2	6	4	3	4	2	8	4	1	1	3	9	4	109	21	7	15	5	13	12	3	3	3	4	3	6	3	0	6	9	1	0	0
OTU_553	Ochrophyta	Raphidophyceae					81.2	Published	ATTAAGTAGTATTGAAGCACATTCAGGACCTTCAGTTGATTTAGCAATTTTTAGTTTACATTTATCTGGTGCATCTTCTATTGCAGGAGCAATCAATTTTATTGTAACTATTGTTAATATGCGTGGACGTGGTCTAGAATTTTATCGATTACCTTTATTCGTCTGAGCAGTTTTTGTCACCGCAATTTTATTATTATTGTCTTTA	24	5	6	19	7	16	3	4	5	15	2	7	9	3	7	8	0	2	2	6	101	56	18	11	5	12	33	21	3	9	2	5	7	4	23	9	3	3	0	0
OTU_554	Arthropoda	Insecta	Diptera	Chironomidae	Chironomus	Chironomus cingulatus	100	Published	TCTTTCTGCGGCTATTGCTCATAGTGGGGCTTCTGTAGATTTAGCTATTTTTTCACTTCACCTTGCAGGTGTTTCTTCAATTCTAGGATCTGTAAATTTTATTACTACAGTAATTAATATGCGAGCCAACGGAATTACACTAGACCGAATACCTTTATTTGTGTGATCTGTAGTTATTACGACAGTTCTTTTACTTCTTTCGCTT	19	4	7	11	1	16	21	18	31	12	7	2	13	18	5	15	4	5	11	7	51	28	68	37	11	5	49	54	13	19	13	16	15	11	10	17	21	15	0	0
OTU_555	Heterokontophyta	Oomycota					76.47	Published	ATTGAGTGGTATTGAAGCACATTCTGGACCTTCCGTAGACCTAGCAATTTTTAGTTTACACTTGTCAGGTGCATCGTCGATCGCTGGTTCTATAAATTTTATAGTTACGATAATCAATATGAGGGCTAAAAACTTAACTTTCTACAGATTACCATTATTTGTATGATCTGTATTTATTACAGCATTTTTATTATTATTATCATTA	10	16	10	7	32	6	11	21	7	13	6	6	5	16	13	13	11	7	8	10	242	67	20	21	36	45	39	30	9	13	7	8	12	14	3	6	17	8	0	0
OTU_556	Heterokontophyta	Oomycota	Pythiales	Pythiaceae	Pythium	Pythium middletonii	99.51	Published	TTTATCAAGCGTACAAGCACACTCAGGTCCTTCGGTAGATTTAGCGATTTTCAGTTTACATTTATCAGGTATATCATCTTTATTAGGTGCAATTAATTTTTTATCTACTATTTATAATATGAGAGCTCCTGGTTTAAGTTTTCATAGATTACCTTTATTTGTTTGGGCTATATTTATTACAGCTTTTTTATTATTATTAACTTTA	0	0	0	1	1	0	0	0	0	0	0	0	0	0	0	0	0	0	0	0	206	390	0	2	0	0	0	0	0	0	0	0	0	0	1	0	0	0	0	0
OTU_557	Echinodermata	Asteroidea					62.67	Published	CCTGTCTGATGCTAAGTATCATTCTGGTATTTCTGTTGATCTTGCTATTTTCAGTCTTCATTTAGCTGGTGTCTCTTCTATTTTAGGTAGAATCAATTTTCTTACTACTATTGTGTGTTCTCGCACTACTAAGCTAATCTCTTTAGATCGTTTACCTTTATTACTATGAGCTATCTCTATTACTGCTATCTTATTACAAGACTT	8	4	0	0	11	14	24	1012	18	11	1491	23	198	263	2762	3410	782	532	11	7	0	0	150	150	0	0	2	0	1	3	9	4	489	546	3	4	30	20	0	0
OTU_558	Ochrophyta	Raphidophyceae					78.95	Published	ATTATCTGGAATTCAAGCGCACTCAGGACCTTCTGTAGATTTAGCTATTTTTAGTTTACATTTATCAGGAGCAAGTTCTATTATGGGATCAAATTTTATTGTAACAATCTTTAATATGAGAGCGCCAGGAATGTTTATGTACAAAATGCCACTTTTTGCATGAGCACTTCTTTTACAGCATTCTTATTATTACTTTCTCTT	88	68	65	90	90	53	103	86	45	110	82	39	44	63	53	103	81	49	50	48	394	444	98	101	131	110	128	120	82	84	54	50	92	77	52	70	57	52	0	0
OTU_559	Basidiomycota						78.43	Private	ATTAGCAAGTATAGAATACCATTCAGGAGCTAGTGTGGATTTAGCTATATTTAGTTTACACTTAGCAGGTATATCTTCTATATTAGGTGCAATGAACTTCATAACAACAATATTAAATATGCGTGTACCAGGTATGACAATGCACAAATTACCTTTATATGTATGAGCTGTATTTTTAACAGCAATATTATTAGTGTTATCATTA	1	0	1	0	0	0	1	0	0	0	3	0	0	3	0	4	2	0	0	0	20	8	2	1	4	5	3	2	1	1	0	1	3	1	1	0	4	1	0	0
OTU_560	Rotifera	Monogononta	Ploima	Synchaetidae	Synchaeta		96.88	Published	TCTTTCAGATTCTAAATTTCATTCAGGAATTTCAGTAGATTTAGCTATTTTTAGTTTACATTTAGCTGGGATTTCTTCTATTATAGGAAGAATTAACTTTATAACTACTATTATTTGTTCTCGTACAACAAAATAATTAGTATAGATCTCCCTTTAATAATTTGAGCTTTAGGTGTAACAGCTTTTCTTTTAGTTACTACATTA	44	31	57	70	229	197	42	1	194	52	0	85	168	153	2	2	52	71	151	142	0	0	0	0	0	0	0	0	23	31	11	19	230	237	50	55	166	148	0	0
OTU_561	Rotifera	Monogononta					75.15	Published	ACTATCTGATAGTAAATTCCATACGGGTATCTCAGTTGACCTGGCTATTTTCAGATTACACCTTGCAGGTATCTCTTCTATCCTAGGTAGAATCAACTTCTTAACGACAATTATAGTGTCTCGCATGAGAACCTCTCTAAGTCTCTCTCGTTTACCTTTATTTCTCTGATCCGTCGCCATCACTGCTGTTCTTCTAATCGTAAGACTT	0	2	3	6	3	5	0	0	3	0	0	0	42	66	0	0	0	0	0	0	0	0	45	29	0	0	15	13	5	0	16	11	1	4	0	0	0	0	0	0
OTU_562	Arthropoda	Insecta	Lepidoptera				86.52	Published	TTTAAGTAGTTTTCAAAGTCACTCTTCTGCAGCTGTAGACTTAGCTATTTTTAGTTTACATTTAGCTGGTATATCTTCTATTTTAGGTGCTATTAATTTTATTACAACAATATTTAATATGAGAGCCCCTGGAATGAAAATGCACCAATTACCTTTATTCGTATGAGCAGTATTAATTACAGCTTTCCTTCTTTTATTATCATTA	4	4	3	4	3	7	13	5	2	9	6	0	3	8	3	17	6	1	0	1	12	29	22	7	11	14	2	1	2	3	2	3	10	6	4	3	5	13	0	0
OTU_563	Basidiomycota	Agaricomycetes					81.37	Published	TCTATCTAGTATTGAATATCATTCAGGTGGTTCAGTTGATTTAGCTATATTTAGTTTACATTTAGCAGGTATAAGTTCAATATTAGGAGCATCTAATTTTATTACTACTATTTTAAATATGAGAGCCCCTGGTATGACTATGCATAGATTACCTTTATTTGTTTGAGCTATATTTATTACAGCTATATTATTATTACTTTCTTTA	4	6	9	10	9	6	17	8	12	13	7	1	3	4	9	13	6	19	7	4	154	75	18	20	19	24	48	19	4	3	0	4	24	15	7	2	8	6	0	0
OTU_564	Ascomycota	Leotiomycetes	Leotiomycetes_order_Incertae_sedis				85.07	Published	ACTATCTGGTATTCAAAGTCACAGTGGACCTAGTGTAGACCTAGCTATATTCGCTTTACACCTATCTGGTGTAAGTAGTCTACTAGGTGCAGTAAATTTTATTACTACTATATTAAATATGAGAAGCCCTGGTATAAGACTACATAAATTAGCATTATTTGGATGAGCAATTTTAGTTACTGCTGTTTTACTTTTATTATCATTA	4	11	15	12	4	8	3	0	8	7	3	3	0	0	5	1	1	1	0	0	80	141	43	31	43	34	34	26	11	9	5	3	24	13	17	18	8	10	0	0
OTU_565	Porifera	Demospongiae					80.6	Private	ACTATCTGGTGTAGAAAGCCATTCAGGGGGATCTGTAGATTTAGCTATTTTTAGTTTACATTTAGCAGGTGCATCATCAATTTTAGGTGCTATGAATTTTATAACAACTGTTTTCAATATGAGAACACCAGGTTTAAAAATGCATAGAATGCCTTTATTTGTATGAGCAATTTTCATTACAGCATTTTTATTAATCTTATCTTTA	8	8	15	15	9	14	11	2	7	12	21	0	7	8	1	16	7	9	19	0	32	56	14	8	8	29	12	22	10	4	18	9	10	11	3	3	16	6	0	0
OTU_566	Heterokontophyta	Oomycota					81.37	Published	TCTAGCAAGTATTGAGTATCACTCAGGTGGTTCTGTAGACTTAGCTATATTTAGTTTACATTTAGCTGGTATTAGCTCTATATTAGGTGCTTCTAATTTTATTACAACTATTTTAAATATGAGAGCCCCTGGTATGACTATGCATAGATTACCATTATTTGTATGAGCTGTTTTCATTACAGCAATCTTATTATTATTATCTTTA	20	6	9	8	9	0	15	4	2	2	3	0	0	6	6	2	5	5	5	5	9	32	7	1	26	9	10	10	4	3	0	5	3	7	12	4	4	5	0	0
OTU_567	Platyhelminthes	Turbellaria	Catenulida				86.87	Published	TTTAGCATCTAATGTTTCTCATGCTGGACCAGCTGTTGATTGTGCTATTTTCTCATTACATCTGGCCGGGGCTTCTTCGATTATAAGATCAATTAATTTCATTACAACAATTGCTTATTTCCGAGGAGATAAAATGAAATGAGAAAGAGTTAGATTATTTGTTTGAGCTGTTTTAATTACAGTATTCTTACTTCTATTAAGTCTA	0	0	0	0	0	0	0	0	0	0	0	0	0	0	0	0	109	121	0	0	0	0	0	0	0	0	0	1	0	0	0	0	0	0	0	0	0	0	0	0
OTU_568	Arthropoda	Insecta					78.61	Private	ATTATCATCAATTGAAAGTCACTCAGGAGGTTCTGTTGATTTAGCTATTTTTAGTTTACATATTGCAGGTGCATCATCAATATTAGGTGCTATGAATTTTATAACTACTGTTATTAATATGCGAGTTCCAAATATGCATATGCATAAAATTACATTATTTACTTGAGCTATATTTATAACTGCAATATTATTATTATTATCTTTA	12	14	2	11	4	15	29	3	11	10	6	12	21	7	4	14	8	6	11	11	14	36	4	10	15	19	9	13	2	1	13	10	8	3	10	5	9	10	0	0
OTU_569	Arthropoda	Insecta					77.5	Private	ACTTTCAGGTATTATAGCTCATCCAGGTTCATCTGTTGATTTTGTAATTTTTAGTCTGCATATGGCTGGTATTTCTTCTATTTTGGGTGCTATTAATTTTATAACAACTATCTTATACTATAGACTTGAAGGTTATCGTTTATATCGTGTACCTTTGTTTGTTTGATCTATTTTAGTGACAGCCGTGTTGTTATTATTGTCTGTA	4	5	1	14	6	7	9	5	4	10	2	1	3	1	3	1	12	7	2	0	17	60	9	8	2	9	6	13	3	4	0	2	9	6	1	3	1	0	0	0
OTU_570	Heterokontophyta	Oomycota	Pythiales	Pythiaceae	Phytophthora		96.57	Published	ATTATCTAGTGTACAAGCCCATTCAGGACCTTCAGTAGATTTAGCTATTTTTAGTTTACATTTAACAGGTATTTCATCATTATTGGGTGCTATTAATTTTATTTCTACAATTTATAATATGAGAGCACCTGGTTTAAGTTTTCATAGATTACCTTTATTTGTTTGGTCTATATTAATTACAGCTTTTCTTTTATTATTAACTTTA	14	14	17	19	18	12	22	14	12	26	7	8	3	4	3	2	10	13	8	4	46	61	39	31	30	29	33	41	14	28	13	18	42	24	14	15	28	18	0	0
OTU_571	Ochrophyta	Phaeophyceae					76.96	Published	ATTATCCAGCATTGCAAGTCACTCAGGCGGATCTGTAGATTTAGCTATCTTTAGTCTCCATTTAGCAGGAGTAAGTAGTATTTTAGGTTCAATTAATTTTATTACTACGGTATTTAATATGAGAGCACCAGGAATGAGTATGCATAGATTACCACTATTTGTTTGGTCTATTTTTATTACTGCTTGGCTATTAGTGCTTTCATTA	11	6	13	18	12	11	30	18	29	15	23	9	18	14	22	18	12	13	14	11	77	94	27	17	32	22	22	24	20	10	11	5	8	13	12	14	14	29	0	0
OTU_572	No Match	No Match	No Match	No Match	No Match	No Match			ATTATCTGATTCTAAATACCATAGAGGGATTTCAGTTGATTTGGCCATTTTCAGGCTTCATCTGTCAGGTGTCTCCTCTATTCTTGGTAGAATCAATTTCCTAACTACTATTTTAGTTTCTCGTATAACCTCCATTATGAGATTAGATCGCCTTCCTTTATTTTTATGATCTATCGCTATTACAGCCGTTCTTCTAATTGTGAGACTA	9	2	0	0	28	11	5	0	10	7	0	5	0	0	20	23	0	0	0	0	21	33	2	1	0	0	19	19	61	33	49	41	5	16	0	0	17	13	0	0
OTU_573	Rotifera	Monogononta	Ploima				87.5	Published	TTTAGCGGACTCTAAATATCATAGAGGTATTTCTGTTGATCTAGCTATTTTTAGCCTTCATCTAGCAGGTATCTCTTCTATTTTAGGTAGTATCAACTTTCTATCTACTATCATTTGTTGTCGTACAACAAAGATAATTTCTATAGATCGTTTACCTTTGATGTTATGAGCGTTAGCTGTTACAGCATTACTTTTAGTAACAAGTCTG	59	38	0	0	0	0	0	0	0	0	0	0	0	0	0	0	0	0	0	0	0	0	0	0	0	0	0	0	0	0	0	0	0	0	0	0	0	1	0	0
OTU_574	Bacillariophyta	Mediophyceae	Stephanodiscales				86.57	Published	GCTATCGAGCGCAACCGCACATTCTGGAGGTTCTGTAGATTTAGCTATTTTTAGCTTGTATTTATTAGGTGTATTTTTTATATTAGGAGCTATTAATTTCATTTGTACAATCTTCAATATGCGAGTAAAAAGTTTATCTTTTCATAATTTACCATTATTTGTGTGGTCTGTTTTAATTACTGCTTTTTTATTGTTGTTATCATTG	0	1	0	0	0	0	0	1	0	0	2	1	0	0	0	0	0	0	0	0	0	0	0	2	0	0	0	0	0	0	0	0	0	0	0	0	1	0	0	0
OTU_575	Arthropoda	Insecta					77.94	Published	TTTATCTAGTATTACTGCGCATTCCGGTGGTTCTGTAGATTTAGCAATTTTTAGTTTGCATTTATCGGGTGTTTCATCTATTGCAGGTGCTATTAATTTTATGACCACTATAATAAATATGCGTGTAAAGGGtatgactttataccgtttacctttatttatttgagctttatttttaactgcttttttatTGGTATTAACTTTA	14	9	13	4	9	8	10	6	6	15	3	2	13	10	4	11	7	10	9	1	138	115	74	50	18	15	47	42	1	0	3	5	7	14	6	13	25	8	0	0
OTU_576	Arthropoda	Insecta					79.63	Published	ATTAAGCAGTATAGCCTATACAAGTAGTCCAGCAGTAGACTTAGCAATATTCTCATTGCATTTAGCAGGGGTATCATCGTTATTAGGAGCAATAAATTTCATAACAACAATAATAAATATGAGATCACCATTAATAACATTTGATAAATTACCATTATTTGTATGAGCAGTATTGATAACAGCAGTACTATTATTATTATCATTA	7	9	0	4	4	4	16	8	5	10	6	1	12	8	2	17	9	8	6	3	81	25	5	3	22	19	20	8	17	1	9	5	6	10	3	6	8	11	0	0
OTU_577	Rotifera	Monogononta	Ploima	Synchaetidae			94.74	Published	TCTGGCAGATGCTAAATATCATTCAGGTATTTCTGTTGATTTGGCGATTTTTAGTCTTCATTTAGCTGGAGTTTCTTCTATTTTAGGAAGAATTAATTTTTTAACTACTATTATTTGTTCTCGTACAAAATTGACCTATGGATCGTTTACCTTTGTTATTATGAGCAATTTCAGTTACAGCTGTATTGTTAATTACAAGATTA	60	44	46	81	199	178	88	99	62	81	110	32	140	165	181	240	38	30	146	121	29	23	10	5	16	11	159	128	140	134	85	101	36	39	79	101	271	335	0	0
OTU_578	Arthropoda	Insecta	Diptera	Chironomidae	Macropelopia	Macropelopia nebulosa	98.53	Private	CTTAGCATCAGGAATTGCTCATGCTGGCGCTTCAGTTGACTTAGCTATTTTCTCTCTTCATCTAGCAGGAGTATCATCTATTTTAGGAGCAGTAAATTTTATTACAACTGTAATTAATATACGCTCTAATGGAATTACTTTAGACCGAATACCCTTATTCGTTTGATCTGTAGTAATTACTGCTGTCTTATTGTTACTATCTTTA	3	4	179	163	1	5	10	2	5	27	4	1	0	0	0	0	0	0	0	1	0	0	17	9	0	0	3	3	4	3	0	4	0	2	3	13	0	10	0	0
OTU_579	Ochrophyta	Raphidophyceae					82.91	Published	ATTATCTAGTTTACAATCACATTCTGGTCCTTCTGTAGATTTAGCAATTTTTAGTTTACATTTAGCAGGGGTAGCTTCTATTTTAGGAGCAATTAATTTTATTGTAACAGTTTTAAATATGAGATGTCCTGGTATGTTTATGCATAAAATTCCTCTATTTGTTTGAGCAATATTTATTACAGCATTTTTATTATTATTTTCTTTA	4	1	20	0	1	0	19	3	3	1	17	1	8	11	3	5	4	2	4	5	89	173	6	8	7	12	6	8	2	8	2	1	5	2	10	7	9	11	0	0
OTU_580	Arthropoda	Insecta	Odonata				85.71	Private	ATTATCAGGAAATATTGCACATTCGGGTCCAGCTGTTGATTTAGCAATTTTTAGTTTACATATTTCCGGAGCATCTTCAATTTTAGGATCAATTAATTTTATTATTACTATTACAAATATGCGAGCACGGGGTATGACAATGTATATGCTACCTTTATTTGCATGATCAGTTTTAATTACGGCATTTTTACTTGTTTTATCATTA	3	7	7	4	13	7	19	6	4	34	6	5	12	25	10	8	9	5	18	6	229	103	12	2	9	3	7	3	10	12	8	1	18	6	7	7	13	13	0	0
OTU_581	Annelida	Polychaeta					75.98	Private	TTTATCTAGTATCACAGCTCATTCTGGTGGTTCAGTTGATTTAGCTATTTTTAGCTTACATTTATCTGGTGTTTCTTCTATTGCTGGTTCAATTAATTTTATGACTACAATAATAAATATGCGTGTTAAAGGTTTGACTTTATACCGTTTACCACTATTTATTTGAGCTTTATTTTTAACAGCTTTTCTTCTTGTTCTAACTTTA	8	7	9	4	17	9	5	11	13	19	31	1	15	10	10	17	7	20	16	11	42	71	12	5	14	23	25	18	2	9	4	5	21	6	8	17	28	19	0	0
OTU_582	Rotifera	Monogononta	Ploima	Synchaetidae	Synchaeta		95.9	Published	ATTATCTGATTCTAAATTTCATTCAGGTATTTCTGTTGATTTAGCTATTTTTAGCTTACATTTAGCTGGTATTTCTTCTATTTTAGGAAGAATTAATTTTTTAACTACTATTATTTGTTCTCGTACAACAAAGATAATTAGTATAGATCGTTTACCACTAATGTTATGATCATTAGGTGTTACTGCCTTTTTATTACTAACTACTTTG	87	76	315	376	401	335	87	331	81	83	284	84	374	453	138	211	210	239	146	172	0	0	21	18	50	41	14	16	118	125	364	463	645	728	233	263	143	217	0	0
OTU_583	Arthropoda	Arachnida					77.6	Published	TCTATCTAGGGTAGCTTTCCATAATGACATTTCTGTAGATCTAGCAATCTTTTCTCTTCACTTggggggggTTTCATCTATTCTTAGATCTATTAATTTTATCACCACTATCTTTGTTATACGATTTTACGGTTTGTTGCTAGAGCGAATCCCTCTCTTCGTGTGGTCTATATTAGTCACTTCTTTTCTTTTATTGTTCTCTCTC	0	0	2	0	0	0	0	0	0	0	0	0	0	0	0	0	0	0	0	0	290	492	4	0	0	0	0	0	0	0	7	5	0	0	0	0	2	4	0	0
OTU_584	Ochrophyta	Phaeophyceae					81.09	Private	TTTAAGCAGTATTACAGCCCATTCAGGAGGTGCTGTTGATTTAGCTATATTTAGTCTTCACGTTTCAGGTGCAAGTAGTATTTTAGGAGCAATAAACTTTATTACTACCATCTTTAATATGAGAGGACCTGGTATGTCTATGCATCGCTTACCATTATTTGTATGGTCTGTACTTATTACTGCATTCTTATTACTTTTATCTTTA	8	19	8	5	11	17	7	9	10	5	15	4	1	5	2	12	13	14	6	3	66	15	8	4	17	22	19	5	6	9	4	13	7	5	7	7	5	2	0	0
OTU_585	Arthropoda	Arachnida	Trombidiformes				86.78	Published	CTTATCAACTCAACCATTTCATAATAATACTTCAGTAGATATGACCATTTTTTCCTTACACTTAGCTGGTATTTCTTCAATTCTAGGAGCAATCAACTTTATTACAACCATCATGAACATACGACCAAAAATAATAACCTTCGAGCGAATTCCATTATTCCTATGATCTATTATAATCACAACAATCTTACTACTTCTATCCTTA	0	0	0	0	0	0	0	0	0	0	0	0	0	0	0	0	0	0	0	0	0	0	0	0	0	0	0	0	0	0	0	0	0	0	0	0	119	124	0	0
OTU_586	Ochrophyta	Phaeophyceae					82.35	Private	ATTAAGTAGTATAACAAGTCATTCAGGTGGTGCTGTTGATTTAGCTATTTTTAGTTTACATCTTTCAGGTGCTAGTAGTATCCTTGGTGCTATTAACTTTATCACTACTATTTTTAATATGAGAGGACCTGGTATGACCATGCATAGACTTCCTCTTTTTGTATGGGCTGTTTTAATTACCGCTTTCTTATTATTGTTATCTCTT	14	7	10	12	22	9	29	4	11	16	5	12	5	15	17	19	6	7	14	10	66	50	20	5	21	9	20	21	10	14	15	5	19	18	8	6	6	13	0	0
OTU_587	Arthropoda	Insecta					82.18	Private	ATTATCAGGAATTATTGCACATTCAGGAGGATCTGTTGATTTAGCAATTTTTAGTTTACATTTAGCAGGAGTTTCTTCGTTATTAGGAGCTATCAATTTTATAACGACAGTCTTCAATATGCGTGCCAGTAATATGAGTTTATATGAAATACCTTTATTTGTTTGAGCCATACTTATTACAGCCTTTTTATTATTATTATCATTA	10	16	15	10	17	20	18	12	13	18	18	7	0	19	8	20	9	10	4	11	77	82	16	12	11	38	25	39	22	5	6	11	14	16	7	20	7	7	0	0
OTU_588	Rotifera	Monogononta	Ploima	Synchaetidae	Polyarthra		97.31	Published	TCTTTCTGACTCTAAGTACCATTCGGGTATTTCAGTAGATTTAGCTATTTTTAGTCTTCATCTTGCTGGAGTTTTCATCTATTCTGGGTAGAATTAATTTTCTTTCAACAATTATTTGCTCTCGAACAACTAAGATAATCTCTCTTGACCGTTTACCTTTATTCCTGTGATCTGTATCTATTACTGCCATTCTAAATTACAAGATTA	0	0	0	0	0	0	1	5	10	4	4	7	26	33	16	35	22	31	38	21	0	0	0	0	0	0	9	9	0	1	0	0	28	26	0	0	1	0	0	0
OTU_589	Ochrophyta	Phaeophyceae					82.35	Published	ACTAAGTAGTATTCAAGCACACTCAGGACCTTCAGTAGATCTAGCAATATTTAGTCTACATCTTTCAGGAGCGTCTTCTATTATGGGTGCTATAAATTTTATTGTAACAATTTTTAATATGCGTGCACCTGGACTATTTATGCATAAACTACCTCTATTTGTATGAGCTGTTCTAATTACAGCTTTCCTACTACTACTATCTCTA	4	7	3	1	2	2	10	7	2	4	1	6	3	4	1	3	10	3	0	1	52	31	6	8	9	7	10	9	4	8	3	6	5	7	9	5	9	2	0	0
OTU_590	Bacillariophyta	Bacillariophyceae					80.39	Published	TTTATCTAGTATAACAGCACATTCAGGAGGATCTGTAGACTTAGCTATTTTCAGTCTTCATTTATCTGGAGCTTCTTCTATTTTAGGAGCTATTAACTTTATTTGTACTATTTTTAACATGCGTACAGATAGTTTACCTTTCCACAAATTACCACTATTCGTTTGGTCTGTTCTTATCACCGCAGTATTATTGCTTTTATCTTTA	6	19	16	11	10	17	15	16	12	41	22	12	11	8	23	26	25	10	9	10	14	23	16	11	31	22	19	10	15	11	5	13	36	12	9	6	13	5	0	0
OTU_591	Ochrophyta	Phaeophyceae					79.1	Published	ACTAAGTGGAATACAAGCGCATTCTGGTCCTGCAGTAGATTTAGCAATTTTTAGTTTGCATATTGCAGGTGCTTCTTCTATTTTAGGTGCAATTAATTTTATAGTTACAATTATGAATATGCGTGCTCGTGGATTAACATTCCATCGTTTACCATTATTTGTATGATCCGTATTTATTACTGCTTTTTTACTTTTATTATCTTTA	0	0	0	0	0	0	0	0	0	0	0	0	0	0	0	0	0	0	0	1	2	14	0	0	0	0	0	0	0	0	0	0	2	0	0	0	0	0	0	0
OTU_592	Arthropoda	Insecta	Diptera	Tipulidae	Tipula	Tipula couckei	100	Private	CCTTTCTGCTGGTATTGCCCATACTGGAGCATCAGTAGATTTAGCAATTTTTTCATTACACTTAGCTGGAATTTCTTCTATCCTAGGAGCAGTAAATTTTATTACAACAGTAATTAATATACGATCTAGAGGAATTACACTAGATCGAATACCATTATTTGTTTGATCAGTAGTAATTACTGCTGTACTTTTACTTTTATCTCTA	19	21	8	9	20	13	19	17	11	14	18	9	6	5	2	3	0	2	1	1	57	398	19	20	33	21	15	8	6	3	4	4	4	2	21	17	28	4	0	0
OTU_593	Rotifera	Monogononta	Ploima	Synchaetidae	Polyarthra		97.5	Published	TCTTTTCTGACTCTAAGTACCATTCAGGTATTTCAGTAGATTTAGCTATTTTTAGTCTTCATCTTGCTGGAGTTTCATCTTTTGGGTAGAATTAATTTTCTTTCAACAATTATTTGCTCTCGAACAACTAAGATAATCTCTCTTGACCGTTTACCTTTATTCCTGTGATCTGTATCTATCACTGCTATTCTATTAATTACAAGATTA	26	16	13	7	120	110	56	190	147	92	188	100	231	305	340	447	144	148	250	211	1	2	12	11	30	35	83	71	42	58	68	95	408	379	19	26	38	29	0	0
OTU_594	Arthropoda	Insecta	Diptera	Tipulidae	Tipula	Tipula paludosa	100	Private	ACTTTCTGCCGGAATTGCCCATACAGGAGCATCAGTAGATCTGGCTATTTTTTCTCTCCACTTAGCGGGAATTTCTTCTATTCTAGGAGCTGTAAATTTTATTACTACAGTTATTAATATACGATCAAGAGGAATTACATTAGACCGAATACCATTATTTGTCTGATCAGTAATAATTACTGCTGTTTTATTACTTCTTTCTTTA	0	2	4	18	13	12	6	5	4	10	6	1	6	1	2	5	9	11	2	8	0	171	23	5	9	9	33	6	7	4	5	10	11	5	5	5	3	2	0	0
OTU_595	Cryptophyta	Cryptophyceae	Cryptomonadales	Cryptomonadaceae			91.54	Published	TCTTAGTAGTATTTCAGGCCACCCTGGCGGTGCTGTTGACTTAGGTATATTCAGTTTACATGTAGCTGGTGCTTCTAGTATTCTAGGTGCTATTAATTTCATAACGACTATTTTTAATATGAGAGTTCCAGGCATGACAATGCATAGAATACCTCTTTTCGTTTGGGCTGTTCTGATAACTGCTTTTTTGCTTCTTCTTTCTTTG	17	13	8	10	2	13	19	5	2	7	13	1	2	12	7	8	5	8	6	0	94	32	26	19	28	27	19	22	14	9	14	7	20	11	6	12	10	9	0	0
OTU_596	Rotifera	Monogononta	Ploima	Synchaetidae	Synchaeta	Synchaeta pectinata	98.43	Published	ATTATCTGATTCTAAATTTCATTCTGGTATTTCTGTCGATTTAGCTATTTTTAGCTTACATTTAGCTGGTTTCTTCTATTTTAGGTAGTATTAATTTTATAACTACTATTATTTGTTCTCGTACAACAAAGATAATTAGTATAGATCGTTTACCATTAATGTTATGATCATTAGGTGTTACTTTTTTTATTACTAACTACTTTG	10	7	32	49	51	64	15	55	27	18	74	17	64	58	37	69	30	36	32	35	0	0	7	6	25	16	0	0	24	17	53	52	60	91	30	38	20	20	0	0
OTU_597	Ochrophyta	Raphidophyceae					81.2	Published	ACTATCTAGTATTCAAGCACACTCTGGGGCTTCTGTAGATTTAGCGATTTTTAGTTTACATTTATCAGGTATTTCTTCAATTTTAGGAGCTGTTAACTTTATCACTACAATCTTAAACATGAGACCGGAAAAAATGAATATGCATTTATTACCTTTATTCGTCTGGGCTGTTTTAATTACTGCTGTATTACTATTATTATCTTTA	19	7	6	13	15	14	21	10	5	17	28	0	13	15	13	11	19	3	7	5	169	74	37	25	39	30	34	25	8	18	17	13	24	20	3	8	12	15	0	0
OTU_598	Heterokontophyta	Oomycota					79.41	Private	TTTAAGTAGTATACTTGCTCATTCTGGGCCCGCTGTAGATTTAGCAATTTTTAGTTTACATCTATCAGGGGCTGCTTCTATACTTGGGGCTATTAATTTTATTACAACAGTGTTTAATATGAGATCACCGGGTTTACATTTTCATAGACTAACTTTATTAGTTTGGGCTTTATTAATAACTTCTTTTTTATTATTGTTATCGTTA	445	334	311	337	420	435	419	305	295	400	416	207	190	261	307	379	335	301	223	208	662	1235	511	367	516	491	572	494	266	308	226	201	342	409	278	302	269	271	0	0
OTU_599	Arthropoda	Insecta					84.3	Private	TTTGTCATCTGTTGAAGCACATAGTGGTCCATCTGTTGATAGAGCTATCTTTTCGCTTCATTTAGCTGGTGCTTCATCTATTTTAGGTGCTATTAATTTTATTACTACTATTATAAATATACGAGCACCTGGTATGACGATACATCGTTTGCCTTTGTTTGTTTGATCTGTTAGAATTACTGCGGTGTTACTATTATTGTCATTA	3	9	16	5	13	24	11	6	13	34	12	10	18	15	14	12	18	10	12	9	125	44	17	5	31	10	10	12	6	10	18	12	10	29	5	15	19	7	0	0
OTU_600	Heterokontophyta	Oomycota	Pythiales				85.78	Published	TTTATCAAGTATTCAAGCACATTCAGGGGGTTCTGTTGATTTAGCTATTTTTAGTTTACATTTAGCAGGTGCTTCTTCTTTATTAGGTGCTATTAATTTTATAACTACTATATTTAATATGAGATCTCCAGGTTTAGAAATGCATAAAATTCCTTTATTTGTTTGAGCTATTTTAATTACAGCGTTTTTATTATTATTATCATTA	7	11	18	5	8	4	10	8	15	13	27	5	18	15	26	20	15	13	10	7	66	90	19	12	37	3	16	20	13	8	9	20	23	11	15	10	13	5	0	0
OTU_601	Ascomycota	Leotiomycetes	Leotiomycetes_order_Incertae_sedis				89.55	Published	TCTAAGTGGAGTACAGAGTCATAGTGGACCAAGTGTAGATTTAGCCATATTCGCTTTACATTTAAGCGGTATAAGTAGTTTACTAGGGGCTATAAACTTCATTACTACGATACTAAATATGAGAAGTCCAGGTATAAGATTACACAAATTAGCTTTATTTGGATGAGCTGTAATTGTTACAGCTGTATTATTATTACTATCTTTA	0	13	19	20	1	5	2	3	0	17	0	2	3	1	2	5	5	7	8	5	0	101	19	16	41	7	19	6	5	14	6	1	116	140	2	14	13	13	0	0
OTU_602	Arthropoda	Insecta	Diptera				89.7	Private	CTTGTCTTCTGGAATTGCTCATGCTGGAGCATCAGTTGACTTAAGTATTTTTTCATTACATTTAGCAGGTATTTCTTCTATTTTAGGAGCTGTAAATTTTATTACTACAGTAATTAATATACGTTCTTATGGTATAACTTTAGATCGTATTCCTTTATTTGTTTGAGCTGTTGCAATTACAGCCCTTTTATTATTACTAAGTTTA	11	13	1	3	1	7	4	5	8	11	8	4	9	7	7	4	1	2	6	2	2	0	27	36	8	14	26	14	5	11	3	3	8	8	2	5	6	0	0	0
OTU_603	Mollusca	Bivalvia	Unionida	Unionidae	Unio	Unio tumidus	100	Published	TTTGTCTAATAAAACATTTCACTCTGGGGTTGCTGTTGATGTGCTAATTTTTTCTTTACATTTGGCTGGGGTTTCTTCAATTCTTGGTTCATTAAATTTTATTACTACTATTGTAAATATGCGCGCAGATGTTATACAAGCTGAGTGTATACCTTTGTTTGTGTGATCTGTTTTGTGTACGGCTGGTTTGGTATTAATTTCTTTT	58	21	0	2	4	3	22	35	5	8	54	4	39	64	5	8	49	73	1	7	0	9	4	1	11	0	25	45	1	4	16	20	47	37	27	41	0	2	0	0
OTU_604	Arthropoda	Insecta	Coleoptera				85.29	Private	TTTATCTAGTATTACTGCTCATTCTGGTGGATCTGTTGATTTAGCTATTTTTAGTTTACATTTATCTGGTGTTTCTTCAATTGCTGGATCAATTAATTTTATGACAACAATAATTAATATGCGTGTAAAAGGTCTTACTTTATATCGTTTACCTTTGTTTATTTGAGCTATGTTTTTGACAGCATTTTTATTAGTTTTAACTTTA	9	18	5	5	3	8	0	13	21	0	7	4	8	6	14	19	5	9	4	5	45	127	23	20	30	47	21	33	9	6	3	2	4	8	14	9	15	6	0	0
OTU_605	Rotifera	Monogononta					81.31	Published	TCTTTCGGATTCTAAATATCACAGGGGCATTTCTGTAGATCTGGCTATTTTCAGCCTTCATATTGCTGGTGTATCTTCTATTTTAGGCAGAATTAATTTTTTGACAACTGTTCTATGTTCTCGTAACTCTAATAGTTTTTCTCTTGATCGAATGCCTCTTCTTTTGTGAGCTTTATCAGTTACAGCTATTCTTCTAATCACTAGTCTT	0	0	0	0	0	0	0	0	0	0	0	0	0	0	0	0	58	54	0	0	0	0	0	0	0	0	129	75	0	0	0	0	0	0	0	0	0	0	0	0
OTU_606	Arthropoda	Insecta					75.12	Published	GCTATCTGGTTTAACTGGTCATTACGGAAGTGCTGTTGATATAGCTATTTTTTCATTACATCTTGCTGGTTTGTCTTCTCTTTTGGGATCAATAAATATGATTGTAACTATTTTAAATATGCGTGCACCTGGATTAAATATGCATAGATTAAATTTATTTGTTTGATCTATTTTTATTACATCTTTTCTTCTTTTACTTTCTTTA	5	6	1	6	8	9	35	15	7	5	17	7	9	8	5	2	15	1	3	10	0	169	17	8	39	8	14	23	4	3	0	6	11	2	2	1	3	9	0	0
OTU_607	Heterokontophyta	Oomycota	Saprolegniales	Saprolegniaceae	Saprolegnia	Saprolegnia ferax	100	Published	TTTATCTAGTGTACAAGCACACTCAGGTCCTTCAGTTGATTTAGCTATTTTTAGTTTACACTTAGCGGGTATTTCTTCATTATTAGGTTCAATAAATTTTATTACTACTATTTATAATATGAGATCACCAGGTTTAACTTTCCATAAATTACCATTATTTGTATGGTCAGTTTTTATTACAGCTTTTTTATTATTATTAAGTTTA	33	41	10	12	11	16	6	4	6	7	8	0	0	10	1	1	2	3	3	0	69	105	27	31	7	13	55	72	8	5	6	8	15	11	14	5	24	36	0	0
OTU_608	Rotifera	Monogononta	Ploima	Synchaetidae	Synchaeta	Synchaeta tremula	98.97	Published	TTTATCTGATTCTAAATTTCATTCAGGTATTTCTGTAGATTTAGCTATTTTTAGTTTACATTTAGCTGGTATTTCTTCTATTTTAGGTAGAATTAATTTTATAACTACTATTATTTGTTCTCGTACTACTAAAATGGTAAGAATAGATCGATTACCTCTTATATTATGATCATTAGGGGTTACAGCATTTTTATTGTTAACTACTTTA	0	0	0	0	0	0	0	0	8	0	0	1	0	0	2	19	0	0	0	0	0	0	0	0	0	0	0	0	0	0	0	0	0	0	0	0	0	0	0	0
OTU_609	Ochrophyta	Chrysophyceae					75	Published	TCTAAGTAGTATTCAAGCACACTCTGGACCATCTGTAGATCTAGCTATCTTTAGTCTACACATTTCTGGAGCATCATCTATTAGGGGAGCTATTAACTTTATCGTTACAATCCTTAATAGGCGTGCACCTGGACTATTTAGGCATAAAATCCCTCTATTTGTATGAGCTGTTCTTATTACAGCTTTCCTACTACTACTATCACTA	2	2	3	1	5	5	1	7	0	8	11	0	5	1	4	1	5	3	5	5	12	12	11	14	2	11	13	11	15	8	1	3	1	9	4	0	1	0	0	0
OTU_610	Arthropoda	Insecta					76.12	Private	TCTTTCCTCTATTAGATTCCATTCGGGAGCAAGCGTTGATTTAGCCATATTCAGTCTACATTTAGCTGGTATCTCTTCATTATTAGGTGCTATGAATTTCATTACTACTATCTTAAATATGCGCGCACCTTTATTAACTATGAATAAATTACCTCTATTTGTTTGGGCTGTATTAATCACTGCTGTCTTATTATTATTGTCATTA	5	4	9	13	8	23	6	10	14	5	6	10	11	7	16	11	18	7	11	19	93	55	14	13	12	11	12	25	18	11	7	5	17	10	4	6	7	14	0	0
OTU_611	Ochrophyta	Phaeophyceae					78.5	Published	ATTATCAGGAATCCAAGCACATTCAGGACCTTCTGTAGATTTAGCAATTTTTAGCTTACATTTATCAGGAGCAAGTTCTATTATGGGTTCTATTAATTTCATCGTTACAATTTTTAATATGAGAGCACCAGGTATGTTTATGTATAAAATGCCACTTTTTGCATGAGCTTTACTTATTACAGCTTTCTTATTATTACTTTCTCTT	0	1	2	2	4	0	1	1	1	13	3	0	0	0	3	1	0	5	1	0	21	16	2	2	9	5	1	5	1	2	1	1	1	2	2	0	1	3	0	0
OTU_612	Rotifera	Monogononta	Ploima	Brachionidae	Brachionus	Brachionus quadridentatus	98.53	Published	TTTATCTGACTCAACTTACCATAGAGGAGTTTCAGTAGACTTAGCTATTTTTAGACTTCATTTATCTGGTGTTTCTTCTATTTTAGGTAGAATTAATTTCTTAACTACTATCATCTGCTCTCGTACTACGAAAAGAATTTCTTTAGATCGTCTACCATTGATGTTGTGGGCTATCGCTGTCACTGCGATCCTACTTATTACTAGGTTG	2	0	3	4	11	12	0	23	0	10	32	2	10	11	0	6	0	0	6	6	124	0	3	10	30	42	7	3	17	10	2	10	13	6	79	78	1	4	0	0
OTU_613	Arthropoda	Insecta					76	Private	TCTTTCTAGCATTACTGCGCATTCTGGGGGATCTGTGGATTTAGCTATTTTTAGCTTACATCTTTCTGGTGTTTCTTCTATTGCTGGTGCTATTAATTTTATGACTACAATTATTAATATGCGTGTAAAAGGTATGACTATGTACCGTTTACCACTTTTTATTTGAGCTATGTTCTTAACAGCATTTTTATTAGTTATGACTTTG	12	33	19	16	15	3	16	4	4	12	4	5	0	1	0	0	1	9	19	10	54	143	20	7	6	7	7	23	32	10	4	2	23	13	13	13	7	3	0	0
OTU_614	Heterokontophyta	Oomycota					74.09	Published	ATTAAGCAGTGTTTTTGCTCATTCTGGCTCTTCTGTTGATATTGCAATTTTTAGTTTGCATCTAGCTGGTATTTCTTCGATAGCTGGTGCTATTAATTTTATTGTAACTATTCAAAATATGCGATGTCGTGGGATGGATTATTCCCGTTTACCTTTATTTGTGTGGACGGTTTTAATTACGGCTATTCTATTATTGTTATCTTTA	17	4	10	10	10	13	5	13	4	12	7	7	12	4	9	15	10	1	13	8	54	132	37	10	13	21	17	16	11	6	9	9	18	7	8	7	8	5	0	0
OTU_615	Rotifera	Monogononta	Ploima	Synchaetidae			91.33	Published	CCTGTCTGATGCTAAGTATCATTCTGGTATTTCTGTTGATCTTGCTATTTTCAGTCTTCATTTAGCTAGCTCTCTTCTATTTTAGGTAGAATCAATTTTCTTACTACTATTGTGTGTTCTCGTACTACTAAGCTAATCTCTTTAGATCGTTTACCTTTATTACTATGAGCTATCTCTATTACTGCTATCTTACTTATTACAAGACTT	595	540	104	113	977	807	1589	159	1650	1390	175	1454	575	922	2791	3826	928	774	683	639	1	0	579	394	0	0	46	63	154	189	274	237	4197	4316	200	247	906	929	0	0
OTU_616	Arthropoda	Collembola	Symphypleona	Sminthuridae			99.49	Published	ACTGTCTTCATCCATTGCACATTCAGGGGCCTCGGTAGACTTAACTATTTTTAGATTACATCTAGCTGGTGTTTCTTCTATTTTAGGTGCCATTAATTTTATTACTACTATTATCAATATACGGGCACCAGGAATGAACTGAGATTTAACTCCATTGTTTGTTTGATCTGTGTATATTACAGCAATTTTATTACTTCTTTCCCTC	0	0	0	0	0	0	3	1	0	0	0	0	0	0	0	0	0	0	0	0	124	65	7	2	0	0	2	0	1	1	0	0	2	4	0	0	0	0	0	0
OTU_617	Heterokontophyta	Oomycota					77.94	Published	TTTATCGGGCCTTCAAGGCCATTCAGGCCCTGCTGTTGATTTTGCTATCTTTAGCCTTCATCTTGCTGGGGTTTCTTCTCTTTTAGGTGCTATTAATTTTATTACTACTATCCTTAATATGAGAGCTCCTGGTTTAACTATGCATAGAATGCCTTTATTTGTTTGAGCTTTATTTGTTACTGCTATCCTTTTACTTCTTACTTTA	17	15	3	14	2	5	25	1	5	12	11	3	6	2	3	11	8	6	1	1	72	0	12	6	97	88	30	35	7	11	3	7	34	30	4	7	9	1	0	0
OTU_618	Rotifera	Monogononta	Ploima	Synchaetidae	Synchaeta	Synchaeta pectinata	98.43	Published	ATTATCTGATTCTAAATTTCATTCTGGTATGTCGATTTAGCTATTTTTAGCTTACATTTAGCTGGTATTTCTTCTATTTTAGGTAGTATTAATTTTATAACTACTATTATTTGTTCTCGTACAACAAAGATAATTAGTATAGATCGTTTACCACTAATGTTATGATCATTAGGTGTTACTGCCTTTTTATTACTAACTACTTTG	208	219	990	1044	1444	1359	443	889	358	562	721	383	1044	1318	505	815	765	781	710	908	1	0	16	20	115	86	23	18	201	252	1212	1616	1842	2226	514	626	407	742	0	0
OTU_619	Bacillariophyta	Bacillariophyceae	Naviculales	Naviculaceae			93.63	Published	ACTATCTGGAATCACAGCTCACTCCGGAGGAGCTGTTGATTTAGCAATTTTTAGCTTACACTTGTCAGGTGCAGCTTCTATTTTAGGAGCTATTAATTTTATTTGTACTATTACAAATATGAGAGCGAAAAATTTACCATTTCATCGATTGCCTTTATTTGTATGGTCTATTTTTATTACCGCTTTTTTATTACTTCTTGCTTTA	13	15	10	27	13	0	17	30	18	39	20	12	7	25	18	15	22	19	17	10	80	63	13	13	21	12	12	22	6	11	10	5	8	12	12	8	17	23	0	0
OTU_620	Basidiomycota						95.08	Private	TCTATCAGGACTACAAAGTCACTCTGGTGGTTCAGTAGATCTAGCTATCTTTAGTCTACACCTATCAGGAATTTCATCAATGCTGGGAGCTATGAATTTTATTACTACAGTACTAAATATGCGAAATCCTGGAATGACACTACATAAACTACCACTATTTGTTTGGGCTATTTTTGTTACTGCTATCCTACTGCTACTATCACTA	0	0	0	0	0	0	0	0	0	0	0	0	0	0	0	0	0	0	0	0	0	0	0	0	0	0	0	0	0	0	0	0	0	0	0	0	0	0	0	0
OTU_621	Heterokontophyta	Oomycota	Pythiales	Pythiaceae			92.16	Published	TTTATCTAGTGTTCAAGCACACTCAGGTCCTTCTGTAGATTTAGCTATTTTTAGTTTACATTTATCAGGTATTTCATCAATGTTAGGTGCTATAAATTTTTTATCTACTATTTATAATATGAGAGCACCAGGTTTAAGTTTTCATAGATTACCTTTATTTGTATGGTCTGTTCTAATAACAGCTTTTTTATTAGTTTTAACTTTA	10	6	11	7	10	8	6	16	10	6	10	4	15	2	2	6	4	11	10	4	58	114	19	11	13	12	34	12	0	12	12	10	10	5	9	18	21	10	0	0
OTU_622	Ochrophyta	Phaeophyceae					77.11	Published	ACTATCTAGTATACAATCACATTCTGGGCCTTCAGTTGATCTAGCAATTTTTAGTCTACATCTATCAGGAGCTTCATCTATTAGGGGAGCTATAAATTTTATAGTTACAATTGTGAATAGGCGTACACCAGGACTATTTAGGCATAAAATACCTCTATATGTTTGATCTGTATTTATTACAGCATTTCTACTTCTACTATCTCTA	9	5	4	0	4	0	6	12	3	3	8	3	3	4	6	2	5	1	4	1	0	94	13	4	7	16	16	22	6	5	1	2	7	9	5	3	3	5	0	0
OTU_623	Heterokontophyta	Oomycota					76.96	Published	ACTTTCAGGAATCCAGGCACATTCAGGGCCATCAGTAGATCTTGCAATTTTTAGTTTCCATTTATCAGGGACAAGTTCTATTTTAGGTTCTATTAATTTTATTGTTACAATTTTTAATATGAGAGCTCCGGGGTTATTTATGCATAAATTACCATTATTTGTATGAGCTGTATTAGTAACAACTTTCTTACTCTTACTTTCATTA	9	2	5	8	9	8	9	12	5	11	1	2	5	4	4	7	5	9	3	2	29	36	20	5	13	6	6	8	5	7	2	4	3	5	5	10	10	5	0	0
OTU_624	Arthropoda	Insecta	Lepidoptera				85.39	Published	ATTATCTAGTATTCAAGCACATTCTGGAGCATCTGTCGATTTAGCTATTTTTAGTTTACACTTAGCAGGTATTTCATCTATTTTAGGAGCAGTTAATTTTATTACAACAATTTTAAATATGAGACCTGAAAAAATGAACATGCATTTATTACCTTTATTTGTATGGGCAGTTTTAATTACTGCAGTATTACTATTATTATCTTTA	5	6	10	15	4	6	30	6	17	16	7	2	3	4	3	4	10	8	1	3	68	77	23	15	23	15	19	12	11	6	10	5	5	6	5	10	13	6	0	0
OTU_625	Rhodophyta	Florideophyceae					76.56	Published	TTTATGTGCAATCGTTGCACATCCTACAGGTGCGGTAGATTTAGCAATTTTTAGTTTACATTTAGCAGGTGCAGCTTCGATTGCGGGTTCTATTAATTTTATGACTACTATTTTTAATTTAAGAGTCCCTGGTTATCATATGTTTCGCTTACCTTTATTTGTTTGAGCGTCATTGATTACTGCTTTTTTATTAGTTTTTACTTTG	29	9	8	14	15	10	5	5	10	2	15	5	12	6	8	5	3	2	11	10	132	34	14	34	42	17	17	14	6	6	7	17	20	20	10	3	8	9	0	0
OTU_626	Arthropoda	Arachnida	Trombidiformes	Eupodidae			100	Published	TTTATCTAATTATTTATTTCATGGTGGTATTTCTGTAGATTTAACTATTTTTTCTTTACACATAGCTGGTGTATCTTCAATTTTAGGTGCTATTAATTTTATTACAACAATTTTGAATATACGTATATCAATAATAACTTTTGAACGTTTACCTTTATTTGTTTGATCTGTTTTAATTACAGCTGTTTTATTGTTACTTTCATTA	25	35	4	4	7	9	32	5	0	30	12	0	1	0	0	0	0	0	0	0	1	16	2	0	0	2	88	39	6	16	3	4	3	0	8	4	7	8	0	0
OTU_627	Cryptophyta	Cryptophyceae	Cryptomonadales				89.05	Published	TCTCAGTAGTATTTCTGGCCATCCAGGCGGTGCTGTTGACTTAGGTATATTTAGTTTACATGTTGCTGGTGCTTCTAGTATTTTGGGTGCTATTAACTTTATAACTACTATTTTTAATATGCGAGTTCCTGGTATGACTATGCATAGAATACCTCTTTTTGTGTGGGCTGTATTAATAACTGCTTTTTTGCTTCTTCTTTCATTG	19	24	14	8	9	10	15	6	5	11	14	3	4	9	5	8	8	9	10	2	37	40	40	22	65	47	39	33	13	23	14	6	28	11	11	11	10	10	0	0
OTU_628	Heterokontophyta	Oomycota	Pythiales	Pythiaceae	Pythium	Pythium arrhenomanes	100	Published	ATTATCAAGCGTACAAGCACACTCTGGACCCTCAGTAGATTTAGCAATTTTTAGTTTACATTTATCAGGTATTTCATCATTATTGGGTGCTATTAATTTTTTATCAACAATCTATAATATGAGAGCTCCAGGTTTAAGTTTCCATAGATTACCTTTATTTGTATGGTCTGTATTTATAACAGCTTTTCTTTTATTATTAACTTTA	6	4	2	8	0	0	3	14	8	2	11	2	4	6	2	9	5	14	10	0	112	211	15	15	27	21	14	26	9	16	6	12	16	15	9	8	10	4	0	0
OTU_629	Heterokontophyta	Oomycota	Pythiales	Pythiaceae			94.12	Published	ATTATCTAGTGTGCAAGCACACTCGGGACCTTCTGTAGATTTAGCTATTTTTAGTTTACACTTATCAGGTATTTCATCTTTATTAGGTGCTATTAATTTCTTATCAACAATTTATAATATGAGAGCTCCTGGTTTAAGTTTTCATAGATTACCTTTATTTGTATGGTCTGTTTTCATAACAGCTTTTTTATTATTATTAACATTA	9	9	15	11	15	13	9	17	8	2	15	2	3	0	3	9	4	2	0	2	59	83	26	14	25	11	29	9	12	9	8	4	19	26	13	25	36	35	0	0
OTU_630	Bacillariophyta	Mediophyceae	Thalassiosirales	Skeletonemataceae	Skeletonema	Skeletonema costatum	98.52	Published	TTTATCAAGTGCAACAGCTCACTCTGGAGGTTCTGTAGATTTAGCAATATTTAGTTTACATTTATCAGGTGCGTCTTCTATTTTAGGTGCTATTAACTTCATTGTACTATTTTTTAATATGCGAGTAAAAAGTTTATCTTTTCATAATCTTCCTCTATTCGTATGATCTGTTTTAATAACAGCGTTTTTACTGTTATTATCTTTG	12	6	14	19	5	5	5	7	3	15	3	6	13	8	5	8	10	9	3	3	26	26	13	23	17	25	16	11	6	1	8	12	10	13	7	17	6	7	0	0
OTU_631	Arthropoda	Insecta					76.96	Private	TCTAAGTTCCATATTAGCTCATTCTGGTTGTGCTGTAGATTTAGCTATATTTAGTTTACATATAGCAGGTGTTTCTTCTATTGCAGGAGCTATTAATTTTATAGTTACTATTATGAATATGAGATGCCCTGGTATGTATTTTAGACGTTTACCTTTGTTTGTTTGATCTGTTTTTATAACAGCCATACTATTACTTTTGTCTTTA	24	16	8	6	6	9	5	4	1	11	7	0	7	7	5	5	0	0	0	6	131	0	13	4	43	17	21	7	4	3	1	4	11	18	12	3	21	3	0	0
OTU_632	Bacillariophyta	Mediophyceae	Stephanodiscales	Stephanodiscaceae			90.2	Published	GTTGTCCAGTGCAACAGCTCACTCTGGCGGTTCTGTAGATTTGGCTATTTTTAGTTTACATTTATCAGGCGCATCGTCTATTTTAGGTGCTATAAATTTTATTTGTACAATTTTTAATATGCGAGTGAAAAGTTTATCTTTTCATAATCTTCCTTTATTTGTATGGTCAGTTTTAATTACAGCATTTTTATTATTGTTATCGTTA	61	44	49	55	32	40	53	46	31	69	30	41	23	64	85	77	60	59	42	52	36	39	53	51	92	80	71	60	37	51	36	70	37	44	19	36	11	33	0	0
OTU_633	Cnidaria	Scyphozoa					79.41	Published	ATTAAGTTCAATCGAAGGTCATTCTGGTCCATCAGTTGATTTAGCTATCTTTAGTTTACATTTATCAGGTGCTTCATCTATTGCAGGTGCAATTAACTTTATTGTTACTATTGTAAATATGCGTGCACGTGGTATGGAATTCTTCAGATTACCTTTATTTGTATGATCTGTATTTATTACAGCAATCTTATTATTATTATCATTA	6	5	22	8	5	13	27	13	4	38	15	2	10	8	4	18	6	4	4	1	22	69	24	12	35	12	11	9	9	6	8	12	17	16	3	16	3	22	0	0
OTU_634	Arthropoda	Insecta					79.78	Private	ATTATCAAGTTATGAATCACATCCTGGTGGATCTGTTGATTTAGCTATATTCAGTTTACATTTAGCTGGAGTTTCTTCAATAGCTGGAGCAATTAATTTTATGACAACAATTATTAATATGCGTGTTGAAGGTTTAACTATGTATAAAATTCCATTATTTATTTGAGCTGTTTTTATTACAGCGTTTTTATTAGTTTTAACATTA	0	0	24	22	3	0	2	0	0	0	0	0	9	12	7	7	19	8	0	2	0	0	2	6	27	35	19	5	5	1	22	20	31	18	0	0	5	5	0	0
OTU_635	Arthropoda	Insecta					77.78	Published	TCTATCTGGTATTACTGCTCATTCTGGTGGTTCTGTTGATTTAGCTATTTTTAGTTTACATTTATCAGGTGTTTCTTCTATTGCTGGTTCAATTAATTTTATGACAACAATAATAAATATGCGTGTAAAAGGTTTAACTTTATATCGTTTACCCTTATTTATTTGAGCTTTATTTTTAACTGCTTTCTTATTAGTTTTAACTTTG	5	7	11	18	2	10	28	5	8	15	7	6	2	5	6	11	29	24	8	13	0	0	0	2	78	36	15	47	28	16	15	12	0	0	30	20	11	3	0	0
OTU_636	Basidiomycota	Exobasidiomycetes	Microstromatales		Jaminaea		100	Private	TCTATCTAGTCTACAAAGCCACTCAGGTGGTTCTGTAGATCTAGCCATTTTCAGTCTACACCTAGCTGGTATTTCATCAATGCTAGGAGCTATGAACTTCATTACAACTATTCTAAACATGCGAAACCCTGGTATGACACTACATAAACTACCACTATTCTGTTGGGCTATTTTTGTAACAGCTATTCTGCTACTACTTAGTCTA	9	3	12	15	9	2	4	3	9	1	2	0	0	0	8	3	5	0	0	1	28	71	13	26	11	10	29	16	16	8	4	1	6	8	4	7	10	7	0	0
OTU_637	No Match	No Match	No Match	No Match	No Match	No Match			TCTGAGCGGAATCGAGGCGCACTCCGGCCCTGCTGTGGACTTCGGTATTTTCAGCCTACACCTAGCTGGAATGTCTTCCATTCTCGGCGCGATTAACTTCATTGTTACTATCTTTAACATGCGTGCACCCGGTATGCCCCTTTACGTTATGCCCCTTTTCGTATGGAGTATTCTGATTACCGCGTTCTTGCTACTTCTTTCCCTG	20	6	16	25	22	12	9	5	20	12	9	6	2	2	4	4	1	5	3	3	130	70	29	15	10	42	23	17	11	20	8	14	2	17	38	30	25	17	0	0
OTU_638	Bacillariophyta	Mediophyceae	Thalassiosirales	Skeletonemataceae	Skeletonema	Skeletonema costatum	98.52	Published	TTTATCAAGTGCAACAGCTCACTCTGGAGGTTCTGTAGATTTAGCAATATTTAGTTTACATTTATCAGGTGCGTCTTCTATTTTAGGTGCTATTAACTTCATTTGTACTATTTTTAATATGCGAGTAAAAAGTTTTATCTTTTCAAATCTTCCTCTATTCGTATGATCTGTTTTAATAACAGCGTTTTTACTGTTATTATCTTTG	0	0	1	0	0	0	1	0	0	0	1	0	0	0	1	1	0	1	0	0	0	0	0	0	0	0	0	1	0	0	0	0	2	0	0	1	0	1	0	0
OTU_639	Cnidaria	Hydrozoa					81.77	Private	TTTATCAGGTATTGAAAGTCATTCAGGGGGTTCAGTTGATTTAGCTATTTTTAGTTTACATTTAGCAGGTGCATCTTCTATATTAGGAGCTTTAAATTTTATTACTACAGTAATTAACATGAGAACTCCTGGTTTAAAAATGCATAGAATACCTTTATTTGTTTGAGCAATTTTTATTACCGCAATATTATTATTATTATCTTTA	7	7	12	10	5	4	12	5	5	9	3	4	14	13	4	14	9	23	17	9	199	133	9	2	22	2	14	4	12	2	7	1	27	15	10	6	8	1	0	0
OTU_640	Rhodophyta	Bangiophyceae	Bangiales				85.29	Published	GTTAGCTAGTGGACAAGCACATTCAGGGCCTTCAGTAGATTTAGCTATCTTCAGTTTACATATCGCAGGTGCATCTTCTATTTTAGGAGCTATTAATTTTATAGTAACTATTTTTAATATGCGTAGTCCTGGAATGTTTATGCATAAATTACCTTTATATGTTTGAGCTGTATTAATAACGGCTTTTTTATTATTATTATCTTTA	13	7	8	11	6	11	9	5	5	15	17	11	13	6	9	10	8	6	10	4	18	0	6	10	8	4	12	15	4	11	8	5	5	13	6	3	3	10	0	0
OTU_641	Heterokontophyta	Oomycota					81.86	Published	TCTATCTAGTATAGAATATCATTCAGGTGGTTCTGTAGATTTAGCTATCTTTAGTTTACATTTAGCAGGGATTAGTTCTATTTTAGGTGCTTCAAATTTTATCACTACAATTTTAAATATGAGAGCTCCTGGTATGACTATGCATAGATTACCTTTATTTGTATGAGCTGTGTTTATTACAGCTATTTTATTATTATTATCTTTA	5	12	10	3	4	11	7	5	9	24	10	5	4	4	8	3	12	7	3	7	64	65	14	26	22	14	14	12	2	6	13	5	9	16	11	5	8	2	0	0
OTU_642	Porifera	Demospongiae					81.86	Published	ACTATCATCAATTGAATTTCACTCAGGTGGATCAGTTGATTTAGCAATATTTAGTTTACATTTAGCTGGTATATCTTCCATACTAGGTGCAATGAATTTTATAACAACAATTATAAATATGAGAGCGCCAGGAATGACAATGCATAGATTACCATTATTTGTTTGATCCGTATTAATAACAGCAGTGTTATTGTTATTATCTTTA	6	19	14	3	28	15	14	33	17	10	16	21	8	7	1	8	11	17	6	1	0	0	15	35	31	33	2	15	10	10	16	5	19	27	7	21	11	11	0	0
OTU_643	Chlorophyta	Chlorophyceae	Chlorococcales	Oocystaceae			90.91	Published	GTTAGCAGGTATTGCTAGTCACTCTGGTGGTTCTGTTGATCTTGCAATTTTTAGTTTACATCTTGCAGGTGCAAGTAGTATTATGGGTTCTATCAATTTTATTACTACAGTATTTAATATGAGAGCTCCGGGTATGAGTATGCATAGATTACCTTTATTTGTATGGGCTGTATTTATTACTGCTTTCTTATTAATTTTATCACTT	12	5	10	7	8	8	19	6	8	19	10	10	5	16	17	12	7	15	11	3	43	56	10	9	13	21	14	4	7	14	7	12	10	13	9	5	7	5	0	0
OTU_644	Rhodophyta	Florideophyceae					79.01	Private	GTTATCAGTGTTAGAGGATAAAGGAGTAGATTTTGCAATCTTTAGTTTACATTTAGCAGGGGTGTCTTCCTTATTAGGAGCAATAAATTTCATAACAACAATATTAAATATGCGTCATCCTGGTTTACATTTACATATAACACCACTTTTTGCTTGAGCGGTTTTAGTTACTGCGTTTTTATTGTTATTATCTTTG	37	12	7	3	30	16	24	3	10	25	4	5	0	2	5	15	2	4	18	10	53	28	0	3	1	1	18	10	17	15	2	0	9	2	5	10	8	2	0	0
OTU_645	Arthropoda	Insecta					75.49	Private	TTTGTCTAGTATTGGTTCTCATTCTGGTGGTTCTGTTGATTTAGCAATCTTTAGTTTACATTTATCAGGCGTTTCTTCTATTGCTGGTTCAATTAATTTTATGACTACAATTATAAACATGCGTGTAAAAGGTTTAACTATGTATCGTATGCCTTTGTTTATTTGAGCTCTTTTTTTAACAGCCTTTTTATTGGTTTTAACTTTA	6	0	3	2	0	0	0	15	11	0	18	5	13	19	0	0	2	12	18	7	77	19	71	38	2	0	50	31	3	3	0	0	19	12	7	11	0	4	0	0
OTU_646	Ochrophyta	Raphidophyceae					79.49	Published	GTTATCGGGTATTCAAGCGCACTCAGGAGCTTCAGTAGACTTAGCGATTTTTAGTTTACATGTATCGGGGGCTTCCTCAATTGCAGGTTCAATTAATTTTATTACTACTATTTTAAATATGCGCTCGCGCGGTATGTATTTATATAAGTTACCGTTGTTTTGTTGAGCTGTTTTAGTTACCGCTTTTTTGTTGTTGTTATCTTTA	8	1	9	6	12	27	18	5	6	14	9	5	16	1	7	19	8	11	15	11	103	128	11	17	14	3	6	14	5	10	3	23	18	11	1	15	9	10	0	0
OTU_647	Rotifera	Monogononta	Ploima	Synchaetidae	Polyarthra		96	Published	TCTTTCTGACTCTAAGTACCATTCAGGTATTTCAGTAGATTTAGCTATTTTTAGTCTTCATCATCTGGAGTTTCATCTATTCTGGGTAGAATTAATTTTCTTTCAACAATTATTTGCTCTCGAACAACTAAGATAATCTCTCTTGACCATTTACCTTTATTCCTGTGATCTGTATCTATTACTGCCATTCTATTAATTACAAGATTA	0	0	1	0	0	0	24	103	80	21	160	83	494	543	301	397	491	494	522	523	0	0	0	0	0	0	341	194	1	0	0	1	549	606	23	20	2	3	0	0
OTU_648	Heterokontophyta	Oomycota	Pythiales	Pythiaceae			90.2	Published	TTTATCAAGTATTTTAGCACATTCAGGTCCTTCTGTAGATTTAGCAATTTTTAGTTTACATTTAGCAGGTATTTCTTCTTTATTAGGTGCAATTAATTTTATTACAACTATTTATAATATGCGAGCACCTGGATTAACATTTCATAAATTACCCTTATTTGTTTGGTCTGTTTTTATTACAGCATTTTTATTATTATTAAGTTTA	5	15	15	21	6	3	7	11	12	9	5	8	8	11	7	18	6	12	8	5	72	143	33	11	17	19	18	15	13	18	11	9	14	15	5	6	6	10	0	0
OTU_649	Rhodophyta	Florideophyceae					81.37	Private	ATTAGCTGGTATTGAAAGTCATTCTGGTGGTTCAGTTGATTTAGCAATCTTTAGTTTACATTTAGCTGGTGCATCATCTATTTTAGGTGCTATGAATTTTATAACCACAATTTTAAATATGAGAACACCTGGTTTAAAAATGCATAGAATACCATTATTTGTGTGAGCAATATTTATAACAGCGATATTATTATTATTATCTTTA	10	17	4	3	4	6	18	3	3	6	17	5	11	6	2	2	7	4	8	3	48	202	2	1	6	9	14	12	8	2	15	5	16	25	6	7	11	8	0	0
OTU_650	Ochrophyta	Phaeophyceae					74.26	Published	ATTAAGTGGAATTGACGCGCATTCCGGTCCGGCAGTCGATCTTGCCATCTTTAGTTTACATTTATCAGGAGCTTCTTCCATTGCAGGTGCGATTAATTTCATCGTGACCATTATGAATATGAGAGCACGCGGTTTAGAGTTTTATCGATTACCACTATTTGTGTGATCAGTGTTTATTACTGCCATTTTATTGTTATTATCTTTA	7	9	7	16	4	32	24	15	21	16	10	6	6	10	22	22	7	2	9	6	33	134	33	14	25	10	19	6	3	6	4	15	14	3	3	15	9	7	0	0
OTU_651	Arthropoda	Insecta	Diptera	Chironomidae	Tanytarsus	Tanytarsus eminulus	100	Published	CCTCTCTTCTAGAATTGCCCATAGAGGGGCTTCTGTAGATTTAGCTATTTTCTCTCTTCATTTAGCGGGAATTTCATCAATTTTAGGATCAGTAAATTTTATTACAACAGCAATTAATATACGAGCTAATGGAATTACGTTAGATCGAATACCTCTATTTGTTTGATCTGTAGTAATTACTACTATTCTTCTTTTACTCTCCCTT	0	0	2	6	7	2	6	1	0	1	0	0	1	1	0	8	4	0	1	5	464	81	16	9	6	5	5	7	2	4	0	2	4	3	1	0	3	0	0	0
OTU_652	Arthropoda	Insecta	Diptera	Chironomidae	Polypedilum		100	Private	TCTCTCTGCCAGTATTGCCCATAGTGGAGCTTCTGTAGATTTAGCAATTTTTTCTCTACACTTAGCGGGAGTTTCCTCAATTTTAGGATCTGTAAATTTTATCACAACGGTTATTAATATACGATCAAAAGGAATTACTTTAGACCGAATACCTTTATTTGTTTGATCAATTGTAATTACAACAGTTCTTTTACTTTTATCATTA	89	32	9	16	3	5	4	8	7	9	2	1	6	1	5	0	3	1	1	0	73	71	7	5	17	6	11	18	9	8	5	13	0	11	11	13	14	21	0	0
OTU_653	Heterokontophyta	Oomycota	Peronosporales				85.78	Private	CCTATCTGGTGCTCAAGCACATTCAGGACCTTCGGTTGATTTAGCAATTTTTAGTTTACATTTAGCAGGAATTTCTTCAATTTTAGGTGCTATCAATTTTATAACTACGATTTATAATATGCGAGCTCCTGGATTAACTTTTCATAAATTACCTTTATTTGTTTGGTCAATTCTTATTACCGCAATTTTACTTTTATTATCATTA	3	2	3	5	1	2	0	0	1	0	0	2	0	0	0	1	0	0	0	0	0	157	7	1	0	0	1	0	0	0	0	0	1	0	19	28	167	126	0	0
OTU_654	Bacillariophyta	Mediophyceae	Thalassiosirales	Skeletonemataceae			90.55	Published	GTTGTCCAGTGCAACAGCTCACTCTGGCGGTTCTGTAGATTTGGCTATTTTTAGTTTACATTTATCTGGCGCTTCTTCTATTTTAGGTGCTATTAACTTCATTTGTACTATTTTTAATATGCGAGTAAAAAGTTTATCTTTTCATAATCTTCCTCTATTCGTATGATCTGTTTTAATTACAGCATTTTTATTATTGTTATCGTTA	84	109	82	131	60	92	94	121	53	153	109	85	71	91	87	127	115	138	111	83	16	46	97	108	143	165	147	135	92	115	57	91	96	90	85	77	46	82	0	0
OTU_655	Heterokontophyta	Oomycota	Pythiales	Pythiaceae	Pythium	Pythium ultimum	98.04	Published	ATTATCAAGTGTACAAGCACATTCAGGTCCTTCAGTTGATTTAGCTATTTTTAGTTTACATTTATCAGGTATTTCATCATTATTAGGTGCTATTAATTTCTTATCAACTATTTATAATATGAGAGCTCCAGGTTTAAGTTTTCATAGATTACCTTTATTTGTGTGGGCTATTTTTATTACAGCTTTTTTATTATTATTAACTTTA	7	5	2	13	10	12	5	13	4	5	9	10	13	24	18	19	12	13	6	6	38	45	21	21	4	8	17	27	5	13	10	9	13	11	16	4	9	16	0	0
OTU_656	Heterokontophyta	Oomycota	Pythiales	Pythiaceae			91.67	Published	ATTATCAAGTGTTCAAGCGCACTCTGGACCTTCAGTAGATTTAGCTATTTTTAGTTTACATTTAGCAGGTATTTCTTCTCTACTAGGTTCAATTAACTTTATTTCAACTATTTATAATATGAGAGCTCCTGGTTTAAGTTTTCATAGATTACCTTTATTTGTTTGGGCTATACTAGTGACAGTTTTTTTATTGTTATTAACTTTA	15	6	15	14	10	10	17	11	11	17	12	9	15	18	6	6	18	8	19	9	52	90	41	15	13	21	28	9	14	13	7	5	1	14	8	4	15	11	0	0
OTU_657	Rotifera	Monogononta	Ploima	Proalidae	Proales		97.55	Published	TTTAGCTGATTCTAAGTATCACAGAGGTATTTCTGTTGACTTAGCAATTTTTAGTCTTCATTTAGCTGGTATTTCTTCTATTTTAGGTAGTATTAATTTTTTATCTACTATTATTTGCTGTCGTACAACAAAAATGATTTCTATAGATCGTTTACCTTTAATGCTTTGAGCGTTAGCTGTTACAGCCTTGCTTTTAGTAACAAGACTT	0	1	0	0	0	0	0	73	0	0	53	0	0	0	0	0	0	0	0	0	0	0	0	0	0	0	0	0	0	0	0	0	0	0	0	0	0	0	0	0
OTU_658	Ascomycota	Dothideomycetes	Pleosporales				91.67	Published	TTTATCAGGTATACAAAGTCATAGTGGTCCAAGTGTAGATTTAGCTATATTTGGATTACATCTATCTGGTATATCTAGTTTATTAGGAGCTATGAATTTCATTACAACTACATTTAATATGAGAAGCCCTGGAATTAGATTACATAAATTAATATTATTCGCATGAGCAGTTGTAATTACAGCTGTTTTATTATTATTATCATTA	4	5	11	14	1	1	8	2	4	7	1	3	4	1	2	0	0	5	1	2	127	114	38	31	21	7	16	30	15	15	6	3	24	7	4	6	5	1	0	0
OTU_659	Bacillariophyta	Bacillariophyceae	Bacillariales				85.78	Published	ATTATCTGGTATTATTGCACACTCGGGTGGTGCTGTGGATCTTGCAATCTTCAGTTTACACTTATCGGGTGCTGCATCTATTCTAGGAGCAATTAATTTTATTTGTACTATCGTAAATATGCGAACTGAAAGTTTACCATTCCACAAATTACCATTATTTGTTTGGTCTGTTTTCATTACCGCAATTTTATTACTACTATCTTTA	18	24	14	23	26	9	17	2	3	15	15	7	4	6	10	5	17	12	7	10	26	0	12	8	24	23	7	12	12	12	2	6	6	11	9	20	6	13	0	0
OTU_660	Basidiomycota						81.25	Private	TCTAGCTGGTGTACAAAGCCACTCAGGTGGGTCAGTTGACCTAGCTATTTTTAGCCTTCACCTTGCAGGTATTAGCTCAATGCTTGGTGCTATGAATTTTATTACTACTATTCTTAACATGCGAAACCCAGGTATGACTCTTCACAAGCTACCTCTATTCTGCTGAGCTATCATGGTAACAGCTATCCTTCTACTACTATCACTA	0	0	0	0	1	0	0	0	11	11	1	0	0	0	0	4	3	0	0	0	0	0	3	0	3	2	8	7	0	1	2	0	4	1	3	4	3	0	0	0
OTU_661	Ascomycota	Ascomycota_class_incertae_sedis	Ascomycota_order_incertae_sedis				87.56	Published	TTTATCTAGTATACAAAGTCATAGTGGACCTAGTGTAGATTTAGGTATATTTGGTTTACATTTATCAGGAGTTAGTTCTTTATTAGGGGCAATGAATTTTATAACTACAATATTAAATATGAGAGCTCCAGGAATAAGATTACATAAAGTAACATTATTTGGATGAGCTGTAGTTGTTACAGCTGTGTTATTATTATTATCTTTA	32	7	24	18	5	15	17	7	10	14	14	10	3	1	4	6	1	1	2	1	59	112	43	20	43	18	14	13	19	17	5	4	9	5	21	27	21	24	0	0
OTU_662	Heterokontophyta	Oomycota	Pythiales	Pythiaceae			90.2	Published	TTTATCTAGTGTTTTAGCACATTCAGGTCCTTCTGTAGATTTAGCAATTTTTAGTTTACATTTAGCTGGTATTTCTTCATTATTAGGTGCCATTAATTTTATAACAACAATTTATAATATGAGAGCACCGGGATTAACATTTCATAAATTACCGTTATTTGTTTGGTCTGTTTTAATTACAGCATTTTTATTATTATTAAGTTTA	8	16	9	9	16	11	21	8	8	10	9	9	10	15	8	11	14	9	10	5	75	97	16	13	26	19	18	19	9	12	16	14	28	13	7	20	18	23	0	0
OTU_663	Bacillariophyta	Mediophyceae	Thalassiosirales	Skeletonemataceae			90.05	Published	GCTATCGAGCGCAACCGCACATTCTGGAGGTTCTGTAGATTTAGCTATTTTTAGTTTACATTTATCTGGTGCGTCTTCTATTTTAGGTGCTATTAATTTTATTTGTACAATTTTTAATATGCGAGTAAAAAGTCTATCTTTTCATAATTTACCATTATTTGTATGATCTGTTTTAATTACTGCGTTTTTACTGTTATTATCTTTG	208	188	164	204	116	134	217	167	111	220	169	143	120	134	118	208	193	233	185	147	108	81	244	215	303	268	215	201	185	257	161	215	186	212	164	172	171	225	0	0
OTU_664	Ascomycota	Leotiomycetes	Leotiomycetes_order_Incertae_sedis				88.73	Published	TTTATCTGGAATACAAAGTCACAGTGGACCTAGTGTAGATTTAGCTATTTTTGCATTACACCTATCAGGAATAAGTTCTCTATTAGGTGCTATGAATTTTATAACAACTATATTAAATATGAGAAGTCCAGGTGTAAGACTGCATAAATTAGCTTTATTTGGATGAGCTGTACTTGTTACAGCAGTATTGTTATTATTGTCCTTA	10	13	12	10	13	8	19	6	7	23	19	1	3	6	6	13	10	3	15	8	20	28	16	11	33	15	36	10	5	12	16	11	15	6	9	8	16	7	0	0
OTU_665	Cnidaria	Scyphozoa					75.49	Published	ATTATCATCAATCCAAGCACATTCAGGACCATCAGTAGATCTTGCTATTTTTAGTTTCCACCTTTCAGGAACAAGTTCTATTTTAGGTTCAATTAATTTTATTGTAACAATTTTCAACATGAGAGCACCAGGTATGTTTATGCATAAAATTCCACTTTTTGTATGATCAGTTCTTGTAACAACATTCCTTTTACTCTTATCTTTA	2	2	1	2	3	3	9	5	2	7	7	5	4	1	6	1	3	3	0	2	17	105	5	6	11	5	15	17	4	4	1	3	10	2	3	5	0	1	0	0
OTU_666	Ascomycota	Dothideomycetes	Pleosporales				91.54	Published	CCTATCAGGAATACAAAGTCACAGTGGGCCAAGTGTGGATTTAGCTATATTCGGATTACATCTTTCTGGTATATCTAGTCTTCTTGGAGCCATGAACTTTATGACTACTACATTTAATATGAGAAGTCCTGGAATTAGACTACATAAATTAATCTTATTTGCATGAGCAGTTGTTATTACAGCTGTTTTATTATTATTATCATTA	5	14	22	25	23	22	22	16	13	22	15	3	15	15	11	15	11	16	24	14	69	143	30	34	39	19	28	22	24	12	9	16	14	15	14	10	17	14	0	0
OTU_667	Rotifera	Monogononta	Ploima	Synchaetidae	Polyarthra	Polyarthra dolichoptera	99.46	Published	TCTGGCAGATGCTATCACTCAGGTATTTCTGTTGATTTGGCGATTTTTAGTCTTCATTTAGCTGGAGTTTCTTCTATTTTAGGAAGAATTAATTTTTTAACTACTATTATTTGTTCTCGTACTACAAAATTGATTTCTATGGATCGTTTACCTTTGTTATTATGAGCAATTTCAGTTACAGCTGTATTGTTAATTACAAGATTA	204	224	230	309	932	863	357	386	199	384	382	142	667	783	761	922	208	172	645	514	74	59	32	25	39	51	732	610	692	839	372	444	128	143	382	441	1120	1366	0	0
OTU_668	Ochrophyta	Phaeophyceae					79.03	Published	ATTGTCATCTATCGAATACCATTCTGGTCCTTCAGTAGATTTGGCAATCTTTAGTCTACATCTATCAGGAGCTTCATCTATCCTTGGTGCCATTAACTTTATCACAACTATCTTTAACAGGCGAGCACCAGGTAGGACTAGGCATCGACTACCACTATTCTGTTGGGCAGTTTTGATCACTGCAGTACTATTGTTGTTGTCTCTT	0	6	21	12	6	5	22	4	4	5	20	1	16	9	25	2	6	2	9	8	1	15	11	6	9	5	13	9	6	7	5	7	6	15	15	6	17	1	0	0
OTU_669	Arthropoda	Insecta	Diptera	Chironomidae	Chironomus	Chironomus melanescens	100	Private	CCTGTCTTCTGCTATTGCCCACAGAGGTGCCTCAGTTGATTTAGCAATCTTTTCTTTACATTTAGCGGGAATTTCATCTATTCTTGGATCAGTAAATTTCATTACAACTGTTATTAATATACGGGCTAATGGAATTACCCTAGATCGAATACCATTATTTGTTTGATCAGTTGTAATTACTACAGTTCTTTTACTTCTTTCACTT	21	8	2	3	1	8	12	8	9	5	7	3	2	2	19	11	0	1	9	0	17	190	27	23	36	17	30	14	3	4	28	13	12	0	13	10	5	4	0	0
OTU_670	Bacillariophyta	Mediophyceae	Stephanodiscales				89.5	Published	GCTATCGAGCGCAACCGCACATTCTGGAGGTTCTGTAGATTTAGCTATTTTTAGCCTGCATTTATCAGGCGCATCTTCTATATTAGGAGCTATTAATTTCATTTTGTACAATTTCAATATGCGAGTAAAAAGTTTATCTTTTCATAATTTACCATTATTTGTGTGGTCTGTTTTAATTACTGCTTTTTTATTGTTGTTATCATTG	1	2	1	0	1	0	0	0	0	2	2	0	0	2	4	0	0	0	0	0	1	0	0	0	2	1	1	0	0	0	0	0	1	1	0	2	1	4	0	0
OTU_671	Arthropoda	Insecta	Diptera	Chironomidae	Cricotopus	Cricotopus suspiciosus	100	Published	TCTTTCTTCAGGAATTGCTCACGCTGGGGCTTCTGTTGATTTAGCTATTTTTTCACTTCATTTGGCTGGTATTTCTAGTATTTTAGGAGCAGTAAATTTTATTACTACTGTAATTAATATACGGTCAGAAGGAATTACTTTAGATCGGATACCTTTATTTGTTTGATCAGTAATTATTACTGCGATTCTATTGTTATTATCTTTA	0	0	0	0	0	0	0	0	0	0	0	0	0	0	0	0	0	0	0	0	224	133	0	0	3	0	0	0	0	0	0	0	0	1	0	0	0	0	0	0
OTU_672	Heterokontophyta	Oomycota	Pythiales	Pythiaceae	Pythium		95.1	Published	ATTATCTAGTGTACAAGCACATTCTGGACCTTCTGTTGATTTAGCTATCTTTAGTTTACATTTATCAGGTATTTCATCATTATTAGGTGCTATTAATTTTTTATCAACTATATATAATATGAGAGCTCCTGGTTTAAGTTTTCATAGATTACCTTTATTTGTATGGTCTATTTTTATTACAGCTTTTTTATTATTATTAACTTTA	7	7	9	2	3	4	6	6	17	3	9	1	0	1	2	1	1	5	2	1	120	197	8	21	34	21	16	7	1	4	3	4	19	13	9	9	9	6	0	0
OTU_673	Annelida	Clitellata	Crassiclitellata	Lumbricidae	Allolobophora	Allolobophora chlorotica L2	100	Private	CCTAGCAAGAAATATTGCTCATGCCGGTCCATCCGTAGACTTAGCTATCTTCTCTCTTCATTTAGCAGGTGCTTCATCAATCTTAGGGGCCATTAATTTTATCACTACTGTTATTAACATGCGATGAAGAGGCTTACGACTTGAACGAATCCCATTATTCGTTTGAGCCGTTCTAATTACAGTAGTGCTTCTACTCCTATCCTTA	11	7	0	5	2	2	0	0	1	2	0	0	0	3	0	3	2	2	2	2	0	34	1	0	2	4	8	3	1	3	4	0	0	1	18	7	2	2	0	0
OTU_674	Basidiomycota						82.35	Private	TCTATCAGGTGTACAAAGCCACTCAGGTGGATCAGTTGACCTAGCAATCTTTAGCCTCCACCTCGCAGGTATTAGCTCAATGCTAGGTGCTATGAACTTTATCACTACAGTACTTAACATGCGAAACCCAGGTATGACTCTTCACAAGCTACCACTGTTCTGCTGAGCAATCATGGTAACAGCTGTACTTCTACTACTATCACTA	5	21	12	16	7	22	10	7	7	11	10	7	1	1	6	1	4	8	2	4	112	13	13	35	13	3	16	16	8	5	18	4	3	17	11	16	5	9	0	0
OTU_675	Arthropoda	Insecta	Lepidoptera				85.12	Private	TTTGTCTTCAGTTGAAGCACATAGTGGACCATCTGTTGATAGAGCTATTTTTTCACTTCATTTAGCTGGTGCATCATCTATTTTAGGTGCTATTAATTTTATTACTACTATTTTAAATATACGTGCTCCTGGTATAACTATACATCGTTTGCCATTGTTTGTTTGATCTGTAAGAATTACTGCTGTTTTGCTATTATTATCATTA	17	8	10	7	12	3	14	7	15	13	20	5	2	10	9	14	14	3	11	4	54	28	29	18	26	6	13	5	11	13	5	6	16	13	14	1	9	12	0	0
OTU_676	Ochrophyta	Raphidophyceae					72	Published	GCTTTCTGCAATTCAAGCGCACTCTGGGCCATCTGTTGACCTAGCAATCTTCTCTCTACACCTTAGCGGAGCTGCATCTATCCTAGGTGCAATTAACTTCATTGTTACTGTTTTCAACAGGCGCGCTCCAGGCCTATTTAGGCACAAGCTTCCGCTTTTTGTATGAGCAGTTCTGATCACAGCATTCCTACTCCTGCTTTCCCTA	1	3	3	7	4	3	5	0	1	4	11	2	1	3	3	6	0	4	3	10	95	28	4	5	29	7	6	8	5	0	0	4	2	2	15	6	18	3	0	0
OTU_677	No Match	No Match	No Match	No Match	No Match	No Match			AGTGATAAACTCGTGCCAGCCACCGCGGTTAGACGAGAGGCCCTAGTTGATATTACAACGGCGTAAAGGGTGGTTAAGGATAAACAAAAATAAAGTCAAATGGCCCCTTGGCCGTCATACGCTTCTAGGAGTCCGAAGCCCTAATACGAAAGTAACTTTAATAAACCCACCTGACCCCACGAAAGCTGAGAAACAAACTGGGATTAGATAC	4	22	7	9	10	21	24	15	14	10	12	24	23	13	28	13	21	9	8	6	10	0	1	5	2	13	13	4	8	11	13	5	8	19	15	5	13	6	14	0
OTU_678	Ochrophyta	Raphidophyceae					79.49	Published	ACTAAGTAGTATTCAAGCACATTCAGGACCTTCAGTAGATCTGGCTATTTTTAGTCTTCATCTTTCTGGAGCTTCTTCAATTCTTGGAGCAATTAATTTTATTGTGACGATCTTTAATATGCGTGCTCCAGGGCTTTTTATGCATAAACTCCCACTATATGTATGATCAGTACTTATTACAGCTTTCCTACTACTGCTATCACTC	2	5	5	6	6	10	3	0	0	1	7	0	5	12	2	2	0	2	2	1	208	231	4	5	0	2	8	1	0	2	4	0	14	11	0	5	0	0	0	0
OTU_679	Rotifera	Monogononta	Ploima	Synchaetidae	Polyarthra	Polyarthra dolichoptera	98.47	Published	TCTGGCAGATGCTAAATATCATTCAGGTATTTCTGTTGATTTGGCGATTTTTAGTCTTCTTAGCTGGAGTTTCTTCTATTTTAGCTGGAATTAATTTTTTAACTACTATTATTTGTTCTCGTACTACAAAATTGATTTCTATGGATCGTTTACCTTTGTTATTATGAGCAATTTCAGTTACAGCTGTATTGTTAATTACAAGATTA	14	22	38	56	124	96	55	71	25	72	57	15	159	147	117	174	29	19	70	79	7	11	5	3	4	4	102	91	82	95	45	79	26	16	55	46	130	241	0	0
OTU_680	Ascomycota	Leotiomycetes	Leotiomycetes_order_Incertae_sedis	Leotiomycetes_family_incertae_sedis	Leohumicola		96.08	Published	ATTAAGTGGAGTACAAAGTCACAGTGGACCAAGTGTTGATTTAGCAATATTTGCTTTACACTTATCAGGTATAAGTAGTTTATTAGGTGCAATAAACTTTATAACTACTATACTTAATATGAGAAGTCCTGGTATAAGATTACATAAATTAGCTTTATTTGGATGAGCTGTAGTAGTTACAGCTGTGTTATTATTATTATCATTA	0	0	3	0	11	2	1	0	0	8	0	0	0	1	0	4	0	0	2	0	269	200	7	5	14	1	1	0	0	0	0	1	1	0	2	3	2	9	0	0
OTU_681	Ochrophyta	Phaeophyceae					76.62	Published	TTTAAGTGGTATTGAAGCACATTCTGGCCCGGCTGTTGATTTAGGAATATTTAGCTTACATTTAGCAGGTGCATCGTCAATTTTAGGTGCCATTAACTTTATTGTAACAATTATTAATATGAGGGCAATTGGTCTCACTATGTATTCTCTACCATTATTTGTTTGAGCTGTTTTAATAACAGCGATTTTATTATTACTTTCGTTA	7	4	5	4	6	7	10	1	5	31	5	7	2	0	0	7	0	3	6	0	0	22	0	4	1	0	12	10	6	1	5	1	16	2	11	5	4	5	0	0
OTU_682	Chordata	Actinopterygii					50	Published	ACTAAGTAGCATTCAAGCGCATTCAGGACCGTCAGTAGATCTAGCTATCTTTAGTCTACACCTTTCTGGTGCTTCATCTATTAGGGGAGCTATTAACTTTATTGTAACGATCCTTAATAGGCGCGCTCCTGGACTATTTAGGCACAAAATTCCACTATTTGTTTGAGCAGTTCTAGTAACAGCGTTTCTACTTCTACTGTCTCTA	13	5	2	5	4	8	1	2	6	13	20	3	4	3	7	6	10	2	0	2	72	15	16	6	10	15	8	12	4	8	1	1	11	3	2	6	4	0	0	0
OTU_683	Annelida	Clitellata	Enchytraeida	Enchytraeidae	Marionina	Marionina sp. 1361 HN-2021	100	Published	ACTATCATCAAACATTGCTCATGCAGGCCCATCAGTCGACTTAGCTATTTTCTCACTACATTTAGCCGGTGCCTCATCAATTCTTGGAGCCATTAATTTTATTACAACAGTTATTAATATACGATGACAAGGCATACAGCTAGAACGCATTCCGCTATTTGTATGAGCAGTTACAATTACAGTTGTACTTCTTCTGTTATCCTTA	13	5	5	0	10	13	5	1	16	4	4	8	0	0	0	2	7	2	0	3	136	0	12	5	1	4	22	5	10	1	0	4	33	46	5	7	5	8	0	0
OTU_684	Arthropoda	Insecta	Diptera	Chironomidae	Cricotopus	Cricotopus rufiventris	100	Private	TTTATCTTCAGGAATTGCACATGCTGGAGCTTCTGTTGACTTAGCTATTTTCTCTTTACATTTAGCAGGAATTTCCTCAATTTTAGGAGCAGTAAATTTTATCACAACAGTAATTAATATACGATCAGAAGGAATTACTCTAGACCGAATACCCTTATTTGTTTGATCCGTTGTAATCACTGCTATTCTTCTTTTATTATCTCTA	25	40	5	4	0	3	19	1	3	8	0	6	0	6	5	8	25	14	0	1	0	70	18	7	2	6	31	4	3	4	3	10	7	13	10	7	6	11	0	0
OTU_685	Bacillariophyta	Mediophyceae	Thalassiosirales	Skeletonemataceae			90.55	Published	GCTATCGAGCGCAACAGCTCACTCTGGCGGTTCTGTAGATTTGGCTATTTTTAGTTTACATTTATCTGGCGCTTCTTCTATTTTAGGTGCTATCAACTTTATTTGTACTATTTTCAATATGCGAGTAAAAAGTTTATCTTTTCATAATCTTCCTTTATTTGTATGGTCAGTTTTAATTACAGCATTTTTACTGTTATTATCTTTG	1041	812	827	842	940	951	743	854	533	866	951	465	528	695	585	890	706	735	658	684	489	522	808	821	1111	992	1108	975	951	1028	523	666	784	869	623	738	601	747	0	0
OTU_686	Arthropoda	Insecta					84.24	Published	TTTATCTATATTAGAGGATAAAGGTGTAGATTTTGCTATTTTTAGTTTACATTTAGCTGGGGTTTCTTCTTTATTAGGTGCTATAAATTTTATAACAACAATAATAAATATGCGTCATCCTGGTTTACATTTACATATAACACCTTTATTTGCTTGAGCTGTTTTAGTAACAGCTTTTTTATTATTGTTATCTTTA	48	15	10	8	1	0	3	2	15	3	3	3	0	0	0	0	9	5	2	1	56	125	0	0	3	5	28	10	2	0	0	1	4	13	23	14	7	5	0	0
OTU_687	Ascomycota	Leotiomycetes	Leotiomycetes_order_Incertae_sedis	Leotiomycetes_family_incertae_sedis			91.67	Published	GTTAAGTGGAGTACAAAGTCACAGTGGACCAAGTGTTGATTTAGCTATTTTTGCCTTACATTTATCGGGTATAAGTAGTTTATTAGGTGCAGTTAACTTTATAACAACTATACTTAATATGAGAAGTCCAGGTATAAGATTACATAAATTAGCTTTATTTGGATGAGCAGTAGTTGTTACTGCTGTATTACTATTATTATCTTTA	23	13	34	34	5	22	10	1	16	5	25	6	5	20	9	7	7	5	10	3	34	0	21	27	7	5	15	15	12	12	13	12	17	7	12	11	24	21	0	0
OTU_688	Ascomycota	Ascomycota_class_incertae_sedis	Ascomycota_order_incertae_sedis				86.27	Published	ATTATCAGGTATACAAAGTCACAGTGGTCCTAGTGTAGATTTAGCTATCTTCGCTCTTCACCTATCAGGTATAAGTAGTCTATTAGGAGCAATGAATTTTATAACAACTATCTTAAACATGAGAAGTCCAGGAATAAGACTACACAAATTGGCTTTATTTGGATGAGCAGTAGTGGTTACAGCAGTTTTATTACTTTTATCTTTA	3	3	16	5	7	3	8	0	1	7	5	1	0	0	2	0	0	0	0	3	4	15	15	24	31	3	73	25	16	33	12	3	31	13	7	19	8	7	0	0
OTU_689	Arthropoda	Insecta	Lepidoptera				85.39	Published	GTTAAGTAGTATTCAAAGCCATTCTTCTGCTGCTGTAGATATAGCTATTTTTAGTTTACATTTAGCAGGTATTTCTTCTATTTTAGGAGCTATTAATTTTATTACAACAATTTTTAATATGCGTGCACCTGGTTTAGGAATGCATCAATTACCTCTATTTGTTTGATCTGTATTTATAACAGCTTTTCTTTTAGTTCTTTCATTA	0	0	0	0	0	0	0	0	2	0	1	0	0	0	0	0	1	3	0	0	0	0	0	0	0	0	3	0	0	1	0	0	0	3	0	0	0	0	0	0
OTU_690	Bacillariophyta	Mediophyceae					80.6	Published	TTTGTCAAGTGTTAATTCTCATTCAGGTCCTGCGGTAGATTTAGCAATATTTAGTTTACATCTATCAGGTGCAGCTTCTATTTTAGGTGCTATAAATTTTATTTGTACTATTTTAAATATGAGAACTAAAGGACTTTTTATGCATAAGCTTCCTTTATTTGTTTGGTCAATATTAATTACAGCAGTTTTATTATTATTATCATTG	16	16	15	8	7	10	20	11	9	22	23	7	5	13	17	8	2	16	16	8	31	14	25	22	18	25	16	24	10	7	8	9	14	12	8	11	9	18	0	0
OTU_691	Heterokontophyta	Oomycota					79.9	Published	ATTATCAGGAATTTTAGCACACTCAGGACCTTCTGTAGATTTAGCTATTTTTAGCTTACATTTATCAGGGGCAAGTTCTATTATGGGTTCTATTAATTTTATTGTAACAATTTTCAATATGAGAGCACCTGGGCTTTTTATGCATAAATTACCATTGTTTGTTTGAGCAGTATTAGTTACAACATTTTTATTATTATTATCTTTA	3	5	7	3	3	0	1	3	3	8	2	1	4	1	1	5	6	3	4	5	87	97	7	3	11	13	7	14	7	5	4	1	2	1	3	5	7	3	0	0
OTU_692	Ochrophyta	Phaeophyceae					84.1	Private	GTTATCTTCAAGTCAAGCACATTCTGGACCTTCTGTAGATTTAGCTATTTTTAGTTTACATTTAGCTGGAGCTGCTTCAATTTTAGGTTCAATTAATTTTATTACTACAATTTTTAACATGCGAGCACCTGGTATGACTATGCATCGATTACCTTTATTTGTGTGGTCAGTTTTGGTTACATCTTTTTTACTGGTAATTTCACTT	15	11	11	11	0	0	2	1	1	0	0	0	1	0	0	0	2	5	3	3	8	12	7	4	4	1	11	15	11	5	0	5	2	5	8	5	7	9	0	0
OTU_693	Heterokontophyta	Oomycota					76.62	Published	ATTATCAAGTATACAAGCACACTCTGGAGCAAATGTAGATTTAGCTATATTTAGTTTACACTTAGCAGGTATTTCGTCTATATTAGGCGCAATAAACTTTATCTGTACAATACTAAATATGAGAGGAGAAAAAGTATCTATGCATCTAATTTCACTTTTTGTTTGGGCTGTTTTAATTACAGCGGTTTTATTATTGTTATCTTTG	8	10	13	14	13	16	9	12	21	11	9	2	4	12	14	5	6	3	12	3	33	66	27	29	23	20	17	17	16	16	13	10	13	24	13	12	20	14	0	0
OTU_694	Arthropoda	Insecta	Lepidoptera				87.5	Private	ATTAAGTGGATCATTGGCGCATAGTGGCGGTTCTGTTGATTTAGCTATTGCTAGTTTACATTTAGCTGGCGTATCTTCAATATTAGGAGCAATTAATTTTATTACTACAATTATGAATATGAGAACAAGGGGTATGTATTTTGAAAGGACGCCTTTGTTTGTATGAACTGTTCTAGTAACAGCATTTTTATTAGTAACAACATTA	7	1	4	0	3	11	8	10	1	4	1	1	3	2	5	0	5	3	4	6	0	98	1	2	19	5	21	10	0	0	0	1	9	4	3	6	1	7	0	0
OTU_695	Bacillariophyta	Mediophyceae	Stephanodiscales				88.6	Published	GCTATCGAGCGCAACCGCACATTCTGGAGGTTCTGTAGATTTTTAGCCTGCATTTATCAGGCGCATCTTCTATATTAGGAGCTATTAATTTCATTTGTACAATCTTCAATATGCGAGTAAAAAGTTTATCTTTTCATAATTTACCATTATTTGTGTGGTCTGTTTTAATTACTGCTTTTTTATTGTTGTTATCATTG	1	0	0	0	0	0	0	0	0	0	0	0	0	0	0	0	0	0	0	0	0	0	0	1	0	0	0	0	0	0	0	0	0	0	0	0	0	0	0	0
OTU_696	Arthropoda	Insecta	Orthoptera	Acrididae	Chorthippus		97.95	Published	TCTCGCAGGAGCAATTGCACATGGAGGAGGATCAGTAGACCTAGCTATTTTTTCATTACATTTAGCGGGTGTTTCATCAATTTTAGGAGCAGTTAATTTCATTACAACCGCAATTAATATACGGTCGGAAAGAATAACACTAGATCAAACACCACTATTTGTTTGATCAGTAGCAATTACAGCACTCCTATTACTATTATCATTA	1	5	3	0	0	0	0	1	0	0	0	0	0	0	0	0	1	1	0	0	0	102	4	1	1	3	0	6	8	1	0	3	14	4	0	0	1	0	0	0
OTU_697	Bacillariophyta	Mediophyceae	Stephanodiscales				89	Published	GCTATCGAGCGCAACCGCACATTCTGGAGGTTCTGTAGATTTAGCTATTTTTTAGCCTGCTTTATCAGGCGCATCTTCTATATTAGGAGCTATTAATTTCATTTGTACAATCTTCAATATGCGAGTAAAAAGTTTATCTTTTCATAATTTACCATTATTTGTGTGGTCTGTTTTAATTACTGCTTTTTTATTGTTGTTATCATTG	9	9	19	15	9	14	8	9	9	14	5	8	9	11	7	21	5	10	6	8	4	7	13	13	10	17	9	8	4	9	4	14	5	5	11	9	6	13	0	0
OTU_698	Arthropoda	Insecta					78.9	Private	GTTATCAAGTATCCAAGCACACTCTGGAGCTTCTGTTGATTTAGCAATCTTTAGTTTACACTTAGCAGGTATTTCATCTATTTTAGGTGCGGTTAACTTCATTACCACTATCTTAAATATGAGACCAGAAGGAATGAGTATGCACTTACTACCATTATTTGTTTGGGCTGTCTTAATTACAGCAGTTTTATTATTATTATCTTTA	6	8	10	4	1	14	9	1	6	7	14	0	9	7	1	8	6	10	7	4	42	107	21	14	12	4	9	19	10	5	9	4	9	17	15	8	6	23	0	0
OTU_699	Arthropoda	Insecta	Odonata	Calopterygidae			93.14	Private	ATTATCTGGAAATATTGCACATTCTGGTCCATCGGTTGATTTAGCTATTTTTAGTTTACATATTGCAGGTGCGTCATCACTTTTAGGATCAATTAATTTTATTGTTACAATCTTAAACATGCGTGCGCGTGGTATGACAATGTATATGCTTCCTTTATTTGTTTGAGCTGTTTTAATTACTGCCTTTTTATTAGTTTTATCGTTA	20	9	5	10	17	17	14	11	19	25	13	2	3	5	9	14	5	9	8	4	102	39	18	6	35	18	42	41	8	11	12	8	21	11	12	13	9	6	0	0
OTU_700	Rhodophyta	Florideophyceae					73.96	Published	GTTAAGTGGTATTGATGCACATTCTGGTCCTGCAGTCGATTTGGCGATTTTCAGTTTACATTTATCTGGTGCATCATCGATTGCTGGCGCTATTAATTTTATAGTAACAATAACAAATATGAGAAGCCGCGGGCTGTATTTTAATACAATGCCATTATTTGCGTGGTCTGTTATTGTCACCGCATTTTTGTTATTACTTTCTTTA	0	0	0	0	0	0	1	0	0	0	0	0	0	0	0	0	0	0	0	0	0	0	0	0	0	0	0	1	3	0	0	0	0	1	0	2	4	0	0	0
OTU_701	Ochrophyta	Phaeophyceae					75.98	Published	ATTATCAGGAATTCAAGCTCACTCAGGAGCATCTGTAGATTTAGCAATTTTTAGTTTACATTTATCTGGAGCAAGTTCTATTATGGGATCTATTAATTTCATCGTAACAATTTTCAATATGAGAGCGCCAGGTATGTTCATGTATAAAATGCCACTTTTCGCATGATCACTCCTTATTACAGCATTCTTATTATTACTTTCTCTT	2	1	5	2	3	6	7	1	0	0	4	0	1	0	0	1	3	0	4	1	5	18	9	1	5	0	1	3	5	2	3	0	2	2	2	2	0	1	0	0
OTU_702	Rotifera	Monogononta	Ploima	Brachionidae	Brachionus		97.95	Published	TTTGTCTGACTCTACTTATCATAGAGGAGTGTCTGTAGATTTAGCTATTTTTAGGTTACATGTTTCTGGTGTATCTTCTATTTTAGGAAGAATTAACTTTTTAACAACTATTATTTGTTCTCGTACAACAAAAAGAATTTCATTAGATCGTCTTCCTTTAATGTTATGGGCAATTGCAGTAACTGCAATCCTTCTTATTACTAGACTT	1	0	0	0	0	0	0	0	12	0	0	13	0	3	0	0	0	0	0	0	0	0	0	0	0	0	2	0	0	0	0	0	0	2	0	0	0	0	0	0
OTU_703	Arthropoda	Collembola	Entomobryomorpha	Isotomidae	Isotoma		95.1	Published	TCTTTCATCTGGTATTGCCCATGCTGGAGCTTCTGTTGATCTATCAATTTTTAGACTCCACTTAGCTGGGGCTTCTTCAATTTTGGGAGCAGTAAATTTCATTACTACGATTATTAATATACGGGCTGCAGGAATATCTTGGGATCGTACCCCTTTGTTTGTTTGATCAGTATTTTTAACTGCAATTCTGTTACTTTTATCTTTA	0	0	10	10	0	0	1	0	0	0	0	1	13	18	2	4	0	0	0	0	9	20	2	5	0	0	0	2	2	1	140	167	1	0	0	0	0	0	0	0
OTU_704	Rotifera	Monogononta	Ploima	Brachionidae	Brachionus		97.34	Published	CCTTTCTGACTCTACCTATCATAGGGGTGTTTCTGTTGATCTTGCTATTTTTAGTTTACATCTTTCTGGTGTTTCTTCAATTTTAGGTAGAATTAACTTTTTAACTACTATTATTGTTCACGCACTACTAAAAGTATTTCTTTGGATCGTCTTCCTCTTATGTTAGCTCTTGCTGTTACGGCTATTCTTTTAATTACTAGACTA	18	15	30	23	35	52	25	15	7	15	20	5	22	13	11	17	18	7	11	10	0	0	0	4	0	3	3	10	5	7	42	35	38	30	13	23	47	63	0	0
OTU_705	Basidiomycota						80.65	Private	ACTATCAGGTGTACAAAGCCACTCTGGTGGGTCAGTTGACCTGGCTATCTTTAGCCTTCACCTAGCAGGAATCAGCTCAATGCTAGGAGCGATGAACTTTATTACAACAATCCTTAACATGCGAAATCCTGGAATGACTCTTCACAAGCTTCCTCTATTCTGCTGAGCAATCATGGTAACAGCCGTTCTTCTACTACTATCACTT	1	0	7	0	6	7	10	3	2	4	13	0	3	0	0	2	0	0	10	0	89	228	3	9	27	11	13	1	4	5	0	0	0	2	0	2	1	1	0	0
OTU_706	Ochrophyta	Chrysophyceae	Chromulinales				89.22	Published	ATTAAGTAGCATTCAAGCTCACTCTGGTCCATCAGTTGATTTAGCTATCTTTAGTTTACATTTATCAGGTGCAGCATCTATTTTAGGAAGTATTAATTTTATTACTACTATCTTTAATATGAGAGCTCCAGGAATGACAATGCATAGATTACCTTTATATGTATGATCAATTTTAATTACTTCATTCTTATTATTATTATCATTA	2	1	1	3	4	0	0	3	4	7	1	0	2	0	4	7	4	0	2	0	46	46	1	3	15	8	2	3	4	6	5	2	3	1	1	1	3	3	0	0
OTU_707	No Match	No Match	No Match	No Match	No Match	No Match			AGTGATAAACTCGTGCCAGCCACCGCGGTTAAACGAGAGGCCCTAGTTAATAATACACGGCGTAAAGGGTGGTTAAGGAAAGCATAACAATAAAGCCGAATGGCCCTTTGGCTGTCATACGCTTCTAGGTGTCCGAAGCCCAATATACGAAAGTAGCTTTAATAAAGCCCACCTGACCCCACGAAAGCTGAGAAACAAACTGGGATTAGATAC	21	21	10	8	8	15	14	15	10	11	14	17	15	24	12	26	19	19	8	17	15	27	10	11	6	14	7	13	9	10	19	19	11	17	8	10	8	8	0	0
OTU_708	Rotifera	Monogononta	Ploima				88.71	Published	ATTATCTTCTAAATTTCATTCTGGTATTTCTGTCGATTTAGCTATTTTTAGCTTACATTTAGCTGGTATTTCTTCTATTTTAGGTAGTATTAATTATAACTACTATTATTTGTTCTCGTACAACAAAGATAATTAGTATAGATCGTTTACCATTAATGTTATGATCATTAGGTGTTACTGCCTTTTTATTACTAACTACTTTG	1	4	8	13	36	29	6	28	10	8	32	8	30	30	18	26	17	16	11	20	0	0	2	1	11	10	0	1	3	2	23	23	37	36	10	22	7	20	0	0
OTU_709	Ascomycota	Dothideomycetes	Pleosporales				91.18	Published	ATTATCAGGAATACAAAGTCACAGTGGGCCAAGTGTGGATTTAGCTATATTCGGATTACACCTTTCTGGTGTATCTAGTCTTCTTGGAGCTATGAATTTCATGACAACTACATTTAATATGAGAAGTCCTGGAATTAGACTACATAAATTAATATTATTTGCATGAGCAGTTGTTATTACAGCTGTTTTATTATTATTATCATTA	5	3	5	15	5	4	12	3	0	7	7	1	0	2	2	4	0	3	1	0	129	78	13	14	11	12	29	29	12	13	9	13	18	9	10	10	5	13	0	0
OTU_710	Rotifera	Monogononta	Ploima	Synchaetidae	Polyarthra		97.45	Published	TCTAGCAGATGCTAAATATCATTCAGGTATTTCTGTTGACTTGGCGATTTTTAGTCTTCATTTAGCTGGAGTTTCTTCTATTTTAGGGAGAATTTTTAACTACTATTATTTGTTCTCGTACTACAAAATTGATTTCTATGGATCGTTTACCTTTGTTATTATGAGCAATTTCAGTTACAGCTGTATTGTTAATTACAAGACTA	676	588	120	204	88	132	80	70	17	115	33	17	2249	3098	1451	1893	12	16	67	60	0	0	0	0	0	0	20	25	775	830	79	99	485	581	68	89	66	139	0	0
OTU_711	Cnidaria	Hydrozoa					81.82	Published	TTTATCTATTTTAGAAGATAAAGGTGTAGATTTTGCTATTTTTAGTTTACATTTAGCTGGGGTTTCTTCTTTAATGGGTGCTATTAATTTTATAACAACAGTAATAAATATGCGTCATCCTGGATTACATTTACATATAACACCATTATTTGCTTGAGCTGTTTTAGTAACAGCTTTTTTATTATTATTATCTTTA	53	23	1	6	26	14	14	12	13	9	11	2	1	7	7	6	3	2	4	2	1	14	20	8	11	1	30	24	4	11	3	2	21	17	13	13	27	24	0	0
OTU_712	Arthropoda	Insecta	Lepidoptera				85.39	Published	ATTAGCTGGTATTGAAAGTCACTCAGGAGGTTCTGTAGATTTAGCTATTTTTAGTTTACATCTAGCAGGTGCTTCTTCTATTTTAGGAGCAATCAATTTTATTACTACAGTAATTAATATGCGTGCTCCTGGTTTAAAAATGCATAGAATACCTTTATTTGTATGAGCAGTTTTTATTACTGCATTTTTATTATTATTATCATTA	9	9	10	5	7	4	23	15	4	13	6	4	20	9	8	8	5	8	11	12	66	49	4	9	7	21	10	13	13	6	5	6	8	11	5	5	9	6	0	0
OTU_713	Rotifera	Monogononta	Ploima	Lecanidae			94.87	Published	TCTTTCTGATGCTAAGTTTCATTCTGGTATTTCTGTAGATTTAGCTATTTTTAGGTTGCATTTAGCTGGTGTTTCTTCAATTTTGGGTAGAATCAATTTTTTAACAACTATTATTTGTTCTCGAACAACAAAAATGGTTTCTATAGATCGTTTACCTTTGATAATTTGAGCTTTAGCGGTTACAGCAATTTTGTTGGTTACAAGATTG	0	1	0	0	0	0	0	0	0	0	0	0	21	69	0	0	28	26	0	3	0	0	0	0	0	0	0	0	0	0	0	0	0	0	2	3	56	48	0	0
OTU_714	Zygomycota						78.62	Private	TCTATCAGGTGTACAAGCTCACTCAGGTGGATCAGTTGACCTAGCAATTTTCGCTCTTCACCTTTCAGGTATTAGTTCAATGCTCGGATCAATGAACATCCTTACAACTATTCTAAACATGCGAGCTCCTGGAATGACACTACACAAAATGCCACTATTCGTATGGGCTATGCTATTCCAATCAGTTATTATTATCCTAGCCGTA	16	2	10	11	10	5	19	5	3	3	1	2	4	5	2	4	2	4	8	3	57	203	12	19	10	17	9	11	5	7	3	5	14	13	11	5	14	8	0	0
OTU_715	Heterokontophyta	Oomycota	Pythiales	Pythiaceae	Pythium	Pythium chondricola	98.04	Published	ATTATCAAGTGTTCAAGCACACTCAGGTCCTTCTGTTGATTTAGCTATTTTTAGTTTACACTTATCAGGTATTTCATCATTATTAGGTGCTATTAATTTCTTATCTACTATTTATAATATGAGAGCTCCAGGTTTAAGTTTTCATAGATTACCTTTATTCGTATGGGCTATTTTCATTACAGCTTTCTTATTATTATTAACTTTA	32	21	14	11	29	29	5	12	6	5	23	8	1	7	2	1	5	3	3	3	20	65	25	10	13	7	26	21	8	4	1	9	6	22	16	20	24	30	0	0
OTU_716	Cnidaria	Scyphozoa					76.12	Published	TCTTTCAAGTATCCAAGCACATTCAGGGCCATCTGTAGATTTAGCTATTTTTAGCTTACATTTATCAGGGGCAAGTTCTATAATGGGATCTATTAATTTTATTGTAACAGTTTTAAATATGAGAGCACCAGGGATTTTCATGCATAAAATGTCACTTTTTGCATGATCAATTTTTGTAACATCATTTTTATTATTATTATCATTA	4	4	2	2	8	3	10	4	5	6	10	3	1	3	3	3	3	4	0	0	46	49	6	5	12	2	7	7	3	2	4	5	8	13	3	0	3	4	0	0
OTU_717	Haptophyta	Prymnesiophyceae	Coccosphaerales				85.78	Published	TTTAAGTAGTATTGAAGCACACTCAGGTCCTTCTGTAGATTTAGCAATTTTTAGCTTACATATTGCTGGAGCATCTTCTTTATTAGGATCAATTAATTTTATTGTTACTATTTTTAATATGAGAGCTCCTGGAATGCATATGCATAGAATGCCTTTATTTGTATGGGCAATTTTAGTAACTACTTTCTTATTATTATTATCATTA	10	6	8	7	0	5	3	7	4	9	1	1	5	8	2	1	6	1	6	2	24	64	9	8	6	0	13	6	5	3	2	3	2	5	4	1	10	12	0	0
OTU_718	Arthropoda	Insecta	Diptera	Chironomidae	Tanytarsus	Tanytarsus brundini	99.51	Private	CTTATCTTCCAGAATTGCCCACAGAGGGGCTTCTGTAGATTTAGCTATTTTTTCTCTTCATTTAGCAGGTATTTCTTCTATTTTAGGATCAGTAAATTTTATTACAACTGCCATTAATATGCGGGCTAATGGAATTACATTAGATCGAATACCTCTGTTTGTCTGATCAGTAGTAATTACAACTGTGTTATTACTTTTATCACTA	119	84	14	12	19	8	9	1	11	8	18	1	0	2	4	2	1	6	13	2	84	43	7	26	44	10	19	9	15	2	18	11	55	47	50	25	19	12	0	0
OTU_719	Arthropoda	Insecta	Lepidoptera				85.39	Published	ATTATCTGGTATTATTGCACATTCAGGTGGTTCTGTTGATTTAGCTATCTTTAGTTTACATTTAGCAGGTATTTCTTCTTTATTAGGTGCTATTAATTTTATAACAACTGTATTTAATATGAGAGCGAGTGCTATGAGTATTTATGAAATACCTTTATTTTGTTGAGCTATTTTAATTACAGCTTTTTTATTATTATTATCATTA	3	8	4	4	0	4	12	10	4	6	7	1	2	6	7	8	7	4	6	1	48	32	13	11	7	13	10	1	5	2	5	7	2	14	5	4	7	3	0	0
OTU_720	Cnidaria	Hydrozoa					78.11	Published	ATTATCAGGAATTCAAGCACATTCAGGACCTTCTGTAGATTTAGCTATTTTTAGTTTACATTTATCAGGGGCAAGCTCAATTATGGGGTCAATTAATTTTATTGTAACCATCTTTAATATGAGAGCACCTGGAATGTTCATGCATAAACTTCCACTTTTTGTATGAGCAGTTCTTATTACTGTATTCTTATTATTACTCTCACTC	2	0	4	3	1	1	0	1	2	0	0	0	0	0	3	1	2	3	1	0	6	11	2	1	3	6	3	0	1	7	0	1	1	1	1	2	2	2	0	0
OTU_721	Arthropoda	Insecta					84.27	Published	TCTATCAGGCATTGAAGCTCATTCTGGTGCGGCTGTGGATTACGGTATCTTTAGCTTACATTTAGCAGGTATTTCTTCTATCCTAGGTGCAATTAATTTTATTGTTACGATTATTAATATGCGAGCTTTGGGTTTAACTTTTTATACATTACCTCTTTTTGTTTGGTCTATTTTAATTACTGCTGTATTACTGTTATTATCTTTA	11	10	6	0	3	1	1	6	3	1	0	0	2	3	0	0	0	0	3	2	250	88	19	1	0	12	2	0	1	1	0	1	1	4	4	3	2	3	0	0
OTU_722	Rotifera	Monogononta	Ploima	Synchaetidae	Synchaeta	Synchaeta pectinata	98.96	Published	ATTATCTGATTCTAAATTTCATTCTGGTATTTCTGTCGATTTAGCTATTTTTAGCTTACATTTAGCTGGTATTTCTTCTATTTTAGGTAGTATTAATTTTATAACTACTATTATTTGTTCTCGTACAACAAAGATAATTAGTATAGATCGTTTACCATTAATGTTATGATCATTAGGTGTTACTGCCTTTTTATTACTACTACCTG	627	578	2367	2529	4754	4417	1340	4178	1849	1383	5187	1142	3825	4603	3146	4249	3103	2732	2903	2893	1	0	203	222	1715	1282	229	196	1357	1238	2839	2825	4241	4963	2668	3122	1735	1776	0	0
OTU_723	Arthropoda	Insecta					82.57	Published	ATTAGCTTCAATAGAAGCACATTCAGGTGGTTCAGTTGATTTAGCTATTTTTAGTTTACATTTAGCTGGTGCTTCATCAATTTTAGGTGCAATTAATTTTATTACTACTGTATTAAATATGAGAGCTCCTGGATTAAAAATGCACATGATTCCATTATTTGTTTGAGCTATCTTTATTACAGCTATATTATTATTATTATCATTA	3	6	12	5	2	0	10	4	9	7	5	6	0	3	9	14	12	17	7	2	41	82	11	4	24	9	20	6	10	2	4	4	4	11	2	5	6	6	0	0
OTU_724	Ascomycota	Leotiomycetes	Leotiomycetes_order_Incertae_sedis	Leotiomycetes_family_incertae_sedis			92.54	Published	ACTAAGTGGTGTACAAAGTCACAGTGGACCTAGCGTAGATTTAGCAATCTTTGCTTTACACTTATCAGGTATAAGTAGTTTATTAGGTGCGGTTAACTTTATAACTACTATACTTAATATGAGAAGCCCGGGTATAAGATTACATAAATTAGCATTATTTGGATGAGCTGTAGTTGTTACAGCCGTATTATTATTACTATCATTA	0	10	32	7	3	4	6	4	0	2	8	4	0	2	1	1	0	0	4	4	147	62	19	90	5	3	1	7	0	8	8	0	5	19	18	12	16	8	0	0
OTU_725	Rotifera	Monogononta	Ploima	Synchaetidae	Polyarthra		96.91	Published	TCTGGCAGATGCTAAATATCATTCAGGTATTTCTGTTGATTTGGCTATTTTTAGTCTTCATTTAGCTGGAGTTTTCTTCTATTTAGGGAGAATTAATTTTTTAACTACTATTATTTGTTCTCGTACTACAAAATTGATTTCTATGGATCGTTTACCTTTGTTATTATGAGCAATTTCAGTTACAGCTGTATTGTTAATTACAAGACTA	528	443	592	488	1415	1455	1254	950	274	1468	1148	117	2102	2319	2288	2754	219	258	685	560	0	0	0	0	0	0	337	310	1680	1638	851	931	124	137	930	939	1779	1853	0	0
OTU_726	Bacillariophyta	Bacillariophyceae					79.41	Published	TCTTTCTAGTATAACTTCACACTCAGGAGGATCCGTAGATTTAGCTATTTTCAGTCTTCATTTATCAGGAGCTTCTTCTATTTTAGGAGCTATTAATTTTATTTGTACTATTTTTAACATGCGTACAGATAGTTTACCTTTCCACAAATTACCTTTATTCGTTTGGGCTGTTCTTATTACTGCAGTATTATTACTTCTATCATTA	6	9	8	2	17	6	2	14	3	14	14	7	5	15	6	5	6	8	2	6	9	2	10	7	20	18	12	8	0	11	11	1	8	21	16	7	22	14	0	0
OTU_727	Bacillariophyta	Bacillariophyceae	Naviculales				86.27	Published	TTTATCTAGTATTACAGGACACTCGGGAGGCGCTGTAGATTTAGCTATCTTTAGTCTTCACTTATCTGGAGCGGCTTCTATTTTAGGGGCTATAAATTTTATTTGTACCATTACAAATATGAGAGCAAAAAGTTTACCATTTCATAGATTGCCTTTATTTGTTTGGTCGATATTTATTACTGCTTTTTTATTATTGTTATCGTTA	8	4	3	7	13	16	29	12	2	27	11	8	12	19	15	32	16	9	12	19	5	45	27	6	24	41	14	11	7	14	7	17	15	14	13	8	20	17	0	0
OTU_728	Bacillariophyta	Mediophyceae	Thalassiosirales	Skeletonemataceae	Skeletonema	Skeletonema costatum	98.52	Published	TTTATCAAGTGCAACAGCTCACTCTGGAGGTTCTGTAGATTTTAGCAATATTAGTTTACATTTATCAGGTGCGTCTTCTATTTTAGGTGCTATTAACTTCATTTGTACTATTTTTAATATGCGAGTAAAAAGTTTATCTTTTCATAATCTTCCTCTATTCGTATGATCTGTTTTAATAACAGCGTTTTTACTGTTATTATCTTTG	39	41	30	46	34	23	36	31	11	35	23	21	26	27	28	58	36	23	22	28	125	96	53	65	69	70	57	40	4	10	16	19	45	31	29	33	23	30	0	0
OTU_729	Rotifera	Monogononta	Ploima	Synchaetidae	Polyarthra	Polyarthra vulgaris	98.96	Published	CCTATCTGACTCTAAGTTCCATTCTGGAATTTCTGTAGATCTTGCCATTTTTAGTCTACATCTTGCTGGTATTTCTTCTATTCTTGGTAGAATCAATTTTCTTTCTACAATTATTTGTTCTCGAACAACCAAGCTTGTTTCCCTAGACCGTCTTCCTCTGATGCTTTGGGCTATAGCTGTCACAGCAGTTCTGCTGGTTACTAGACTA	0	0	0	0	31	70	0	0	0	0	0	0	63	66	0	0	0	0	0	0	0	0	0	0	0	0	0	0	0	0	0	0	81	113	0	0	0	0	0	0
OTU_730	Annelida	Clitellata	Tubificida	Naididae	Chaetogaster	Chaetogaster cristallinus CEF	100	Private	ACTTTCTAGGAATCTTGCACATGCAGGACCTTCAGTAGATATGGCTATTTTCTCTTTACATTTAGCAGGTGCTTCTTCAATTCTTGGAGCAGTGAACTTTATCACTACAACTATTAACATACGATGAAACGGAATACGATTAGAACGATTACCTCTATTTGTATGAGCAGTACTATTAACTGTAATTCTATTACTTCTATCATTA	1	0	0	0	0	0	1	0	0	0	0	0	21	31	14	17	0	4	0	0	0	0	0	0	0	0	2	0	0	2	0	0	0	0	0	4	2	4	0	0
OTU_731	Arthropoda	Insecta					78.11	Private	GCTTAGTTCTATATTAGCTCATTCTGGCTGTGCTGTAGATTTAGCTATTTTTAGTTTACATATAGCAGGTATTTCTTCGATAGCAGGTGCAATTAATTTTATTGTTACAATTATAAACATGCGTTGTCCTGGAATGTATTTTAGAAGGTTACCTTTATTTGTTTGATCTGTATTTATCACTGCTATTTTATTACTACTATCTTTG	13	28	10	4	0	0	0	0	16	0	15	10	0	0	1	19	0	0	11	3	30	0	0	6	0	0	16	2	1	5	0	0	10	13	20	9	7	4	0	0
OTU_732	Rotifera	Monogononta	Ploima				87.33	Published	TTTGTCTGACTCAAAGTATCATAGTGGTATTTCTGTTGACTTAGCCATCTTTAGGCTTCATCTTTCTGGTGTTTCCTCTATCCTAGGAAGTATTAACTTTCTTACTACCATCCTCGTTTCTCGTATGACTTCTACTCTAAGGCTTGATCGTTTACCCCTCTTTCTTTGATCTATTGCTATCACAGCCGTTCTTTTAATTGTTAGTCTT	0	0	0	0	0	0	0	0	0	0	0	0	0	0	0	0	0	0	0	0	0	0	0	0	0	0	95	129	9	7	14	36	2	3	1	2	0	0	0	0
OTU_733	Bacillariophyta	Mediophyceae	Thalassiosirales				87.75	Published	GTTGTCCAGTGCAACAGCTCACTCTGGCGGTTCTGTAGATTTGGCTATTTTTAGTTTACATTTATCTGGCGCTTCTTCTATTTTAGGTGCCATTAACTTTATTTGTACAATCTTTAATATGCGAGTAAAAAGTTTATCTTTCCACAATCTTCCACTATTCGTATGGTCTGTTTTAATTACAGCATTTTTATTATTGTTATCGTTA	161	225	154	218	132	153	135	157	87	234	132	187	109	146	110	152	169	160	176	175	75	101	176	191	246	280	221	183	128	186	129	164	179	137	120	141	102	210	0	0
OTU_734	Rotifera	Monogononta	Ploima	Synchaetidae	Synchaeta		97.37	Published	ATTATCTGATTCTAAATTTCATTCTGGAATCTGTTGATCTTGCAATTTTTAGTCTTCATATTGCTGGTATTTCGTCTATTTTAGGGAGAATCAACTTTATGACTACTATTATTTGCTCTCGTACTAAAATAGTGAGAATAGATCGTCTTCCTTTAATAATTTGATCCTTAGGGGTAACAGCATTCCTTTTAGTAACAACTTTA	196	189	692	609	336	314	110	168	232	157	213	133	126	182	95	138	65	89	83	76	0	0	155	114	0	0	156	165	208	239	98	114	714	854	127	144	562	643	0	0
OTU_735	Ochrophyta	Raphidophyceae					82.91	Published	ACTATCTAGTGTTCAAGCACACTCTGGACCATCAGTTGATTTAGCTATTTTTAGTTTACACGTATCAGGTGCTTCTTCTATTATGGGTTCAATTAATTTTATTACAACAATTATTAATATGAGAGCTCCCGGTATGTATATGCATCGTTTACCTTTATTTGTATGGTCTGTTTTTGTAACAGCATTTTTATTATTATTATCATTA	11	5	4	12	8	11	12	2	7	6	5	7	6	4	6	10	9	13	14	10	67	92	17	5	22	8	10	7	9	17	10	8	19	23	7	12	13	8	0	0
OTU_736	Arthropoda	Insecta					78.84	Private	TTTAAGCGGCCCTATCGCGCATGCAGGACCTTCTGTAGATTTTGCAATTTTCAGTTTACATATTGCAGGGGCCTCTTCTATTATGGGTGCTATTAACTTTATCACAACTATTGTTAATATGAGACATCCAGGTCTTGAGTTTCACAATTTAAATTTATTTGTATGGTCAGTATTTATTACTGCCATTTTATTATTATTATCTTTA	9	6	5	15	1	5	31	2	17	18	6	3	7	6	13	0	11	10	5	4	62	63	7	9	8	9	19	18	3	2	12	4	13	10	5	4	9	9	0	0
OTU_737	Rhodophyta	Florideophyceae					78.87	Private	ATTAAGTGGCATTGAAGCTCATTCCGGAGCAGCAGTCGATTTTGGAATTTTTAGTTTACATTTAGCAGGTGCATCTTCAATATTAGGTGCAATAAATTTTATCGTTACTATCTGAAATATGCGTGCACCAGGTTTAGCATTTCATTCTATTCCTTTATTTGTTTGATCGGTTTTATTAACCGCAATATTATTATTATTATCTTTA	10	23	11	17	2	18	5	6	4	2	6	5	10	2	2	12	4	11	14	4	149	50	23	17	10	8	15	16	12	4	11	11	10	13	9	5	17	2	0	0
OTU_738	Annelida	Polychaeta	Spionida	Spionidae			90.64	Published	GTTGTCCAGTGCAACAGCTCACTCTGGCGGTTCTGTGGATTTAGCTATATTTAGTTTACATTTATCAGGTGCGTCATCTATTTTAGGTGCCATTAACTTTATTTGTACAATCTTTAATATGCGAGTAAAAAGTTTATCTTTCCACAATCTTCCACTATTCGTATGGTCTGTTTTAATTACAGCATTTTTATTATTGTTATCGTTA	176	177	152	185	126	127	147	136	73	156	146	137	107	124	106	168	115	142	126	114	104	118	176	164	181	248	207	165	114	122	86	137	117	132	97	84	86	143	0	0
OTU_739	Ochrophyta	Raphidophyceae					82.05	Published	ATTAAGTTCAATTCAAGCACACTCTGGACCATCAGTAGATTTAGCTATTTTTAGTCTTCATTTATCAGGAGCTGCTTCAATTCTTGGTGCAATTAATTTTATTACTACTGTTTTAAATATACGTGCACCAGGAATACACATACACCGTTTACCATTATTTGTGTGGGCAGTCTTTATTACCGCAATCTTACTTTTATTAAGTTTA	2	0	10	10	2	3	5	2	2	5	6	1	3	5	3	5	4	3	2	7	57	74	5	13	19	3	9	13	13	4	3	1	4	3	0	1	2	5	0	0
OTU_740	Rotifera	Monogononta	Ploima	Euchlanidae	Euchlanis	Euchlanis dilatata	98.04	Published	CCTCTCTGATTCTAAATATCACTCTGGCATTTCAGTAGATCTAGCTATTTTTAGTCTTCATTTAGCTGGTATTTCATCTATCTTAGGTAGTATCAATTTTTTGACTACTATTATTTGTTCTCGTACAGCAAAAGCTATTTCACTCGATCGTATGCCTCTTATGTTGTGGGCATTTGCTGTTACTTCTGTGCTTCTTGTTACTAGTCTT	2	5	0	5	295	295	1	0	3	4	1	0	4	0	0	0	0	0	0	1	3	0	2	3	0	0	16	4	0	8	0	0	1	1	0	0	1	1	0	0
OTU_741	Ochrophyta	Phaeophyceae					82.32	Published	ATTAGCAGGAATAGAAGCACATTCAGGAGGTTCTGTTGATTTAGCTATTTTTAGTTTACATTTAGCAGGAGCTTCTTCTATTTTAGGAGCAATGAATTTTATTACTACAGTAATAAATATGAGAGCTCCCGGAATGTATATGCATAGAATACCTTTATTTGTTTGAGCTATTTTTGTTACAGCTTTTTTATTACTATTATCATTA	2	0	2	1	6	1	5	3	0	3	2	2	0	3	6	7	3	1	5	1	143	0	4	7	5	1	2	3	1	1	0	4	2	13	0	0	2	4	0	0
OTU_742	Rotifera	Monogononta	Ploima	Synchaetidae	Polyarthra		95.38	Published	TCTGGCAGATGCTAAATATCATTCAGGTATTTCTGTTGATTTGGCGATTTTTAGTCTTCATTTAGCTGGTATTTCTTCTATTTTAGGTAGTATTAATTTTATAACTACTATTATTTGTTCTCGTACTACAAAATTGATTTCTATGGATCGTTTACCTTTGTTATTATGAGCAATTTCAGTTACAGCTGTATTGTTAATTACAAGATTA	1	3	11	6	31	28	11	10	6	5	1	1	26	33	10	25	6	6	24	9	0	0	0	0	0	1	4	2	23	30	16	13	1	5	8	14	27	38	0	0
OTU_743	Rotifera	Monogononta	Ploima				88.54	Published	TCTCTCAGATTCAAAATATCATTCAGGAGTTTCTGTTGACTTAGCTATTTTTAGACTTCATTTGGCAGGAATTTCTTCTATTTTAGGAAGAATCAATTTCTTAACTACTATTTTGTGCTCTCGTACTACTAAAATAATTTCACTCGACCGTTTACCCCTTTTTTTATGAGCTGTAGCTATTACAGCTATTCTTTTAATCACTAGACTG	0	0	0	0	0	0	0	0	14	0	0	10	0	0	0	0	0	0	0	0	0	0	0	0	0	0	0	0	0	0	0	0	0	0	23	15	0	0	0	0
OTU_744	Rotifera	Monogononta	Ploima	Synchaetidae	Polyarthra		97.4	Published	TCTGGCAGATGCTAAATATCATTCAGGTATTTCTGTTCATTTGGCGATTTTTAGTCTTCATTTAGCTGGAGTTTCTTCTATTTTAGGAAGAATTAATTTTTTAACTACTATTATTTGTTCTCGTACTACAAAATTTCTATGGATCGTTTACCTTTGTTATTATGAGCAATTTCAGTTACAGCTGTATTGTTAATTACAAGATTA	24	28	43	49	173	157	70	98	27	66	108	27	102	128	117	143	35	40	116	98	14	20	10	3	14	10	138	98	99	136	63	76	22	22	73	64	170	232	0	0
OTU_745	Ascomycota	Dothideomycetes	Pleosporales				91.67	Published	TTTATCAGGTATACAAAGTCACAGTGGTCCAAGTGTGGATTTAGCTATATTTGGATTACATTTATCTGGTATATCTAGTTTACTAGGAGCTATGAATTTCATGACAACTACATTTAATATGAGAAGTCCTGGAATTAGACTACATAAACTAATTTTATTTGCATGAGCAGTTGTTATTACAGCTGTTTTATTATTATTATCATTA	0	0	0	0	0	0	0	0	0	3	0	0	0	0	0	0	0	0	0	0	0	0	0	0	0	0	0	0	0	0	0	0	0	0	0	2	0	0	0	0
OTU_746	Arthropoda	Insecta	Lepidoptera				87.64	Published	TTTATCAAGTATTCAAGCACACTCAGGCGCTTCTGTTGATTTAGCTATTTTTAGTTTACATTTAGCAGGTATTTCTTCAATTTTAGGTGCTGTTAACTTTATTACAACTATTTTAAACATGCGACCTGAAGGTATGAGCATGCATTTATTACCTTTATTTGTATGGGCTGTTTTAATTACTGCAGTTTTATTATTATTATCATTA	0	4	3	1	11	7	3	1	0	4	8	2	1	4	2	1	4	2	2	4	68	53	4	6	6	4	3	13	2	9	5	0	6	8	5	2	3	1	0	0
OTU_747	Bacillariophyta	Bacillariophyceae					81.37	Published	TCTTTCAAGTATAACCGCACATTCAGGAGGATCTGTAGATTTAGCTATTTTTAGTCTTCATTTATCAGGAGCTTCTTCTATTTTAGGAGCTATTAACTTTATTTGTACTATTTTTAACATGCGTACAGATAGTTTACCTTTTCATAAACTACCCCTATTTGTTTGGTCTGTTCTTATTACTGCAGTGCTATTACTTTTATCTTTA	4	4	4	6	2	17	15	1	3	7	9	0	12	7	1	1	9	11	6	6	0	0	11	5	3	2	0	0	4	5	15	12	14	20	2	2	11	4	0	0
OTU_748	Bacillariophyta	Mediophyceae	Stephanodiscales				87.56	Published	GCTATCGAGCGCAACCGCACATTCTGGAGGTTCTGTAGATTTAGCTATTTTTAGCCTGCATTTATCAGGCGCATCGTCTATTTTAGGTGCTATAAATTTTATTTGTACAATTTTTAATATGCGAGTGAAAAGTTTATCTTTTCATAATTTACCATTATTTGTGTGGTCTGTTTTAATTACTGCTTTTTTATTGTTGTTATCATTG	28	44	29	36	19	41	15	29	16	40	19	27	36	33	29	33	22	35	28	25	1	7	21	9	19	35	26	29	33	30	27	43	19	20	26	17	18	30	0	0
OTU_749	Bacillariophyta	Mediophyceae	Thalassiosirales	Skeletonemataceae			93.14	Published	TTTATCAAGTGCAACAGCTCACTCTGGAGGTTCTGTAGATTTAGCAATATTTAGTTTACATTTATCAGGTGCGTCTTCTATTTTAGGTGCTATTAATTTTATTTGTACAATTTTTAATATGCGAGTAAAAAGTCTATCTTTTCATAATTTACCGTTGTTTGTATGAGCTGTTTTAATAACAGCGTTTTTACTGTTATTATCTTTG	16	10	19	8	11	11	10	11	6	7	1	6	7	7	6	8	7	7	7	9	1	1	11	14	12	24	15	13	14	16	2	7	11	12	6	6	10	12	0	0
OTU_750	Arthropoda	Collembola	Entomobryomorpha	Isotomidae			100	Private	CCTCTCGGCAGGTATCGCCCATGCAGGAGCTTCAGTAGACCTTTCAATTTTCAGCTTACACTTAGCTGGTGCAAGCTCTATTCTAGGAGCTATTAATTTTATTACTACCATTATTAACATACGTTCCGCTGGTATAACTTGAGACCGCACTCCTTTATTCGTTTGGTCTGTATTTTTAACGGCTATTTTGTTACTCTTATCCCTT	0	2	0	0	5	0	0	20	3	1	21	0	2	1	9	0	0	0	0	0	0	0	0	1	193	164	0	0	0	0	0	1	0	0	0	0	0	1	0	0
OTU_751	Bacillariophyta	Mediophyceae	Stephanodiscales				87.37	Published	GCTATCGAGCGCAACCGCACATTCTGGAGGTTCTGTAGATTTAGCTATTTTTAGCCTGTATTTATCAGGCGTATCTTCTATATTAGGAGCTATTAATTTTATTTGTATAATTTTTAATATGTGAGTAAAAAGTTTATCTTTTCATAATTTACCATTATTTGTGTGGTCTGTTTTAATTACTGCTTTTTTATTGTTGTTATCATTG	0	2	0	0	0	0	0	0	0	2	0	0	0	0	0	0	0	0	0	0	0	0	0	0	0	0	0	0	0	0	0	0	0	0	0	1	0	0	0	0
OTU_752	Heterokontophyta	Oomycota	Pythiales	Pythiaceae	Pythium		97.06	Published	ATTATCTAGTGTTCAAGCACATTCAGGACCATCAGTAGATTTAGCTATTTTTAGTCTACATTTATCAGGTATATCATCGTTATTAGGCGCAATTAATTTTTTATCTACTATATATAATATGCGAGCTCCTGGTTTAAGTTTTCATAGATTGCCTTTGTTTGTGTGGGCTATTTTTATAACGGCTTTTTTATTATTATTAACTTTA	0	1	4	1	9	1	11	9	9	6	8	2	1	2	1	7	10	8	5	9	122	105	12	2	25	12	5	7	16	1	5	4	15	13	6	1	4	13	0	0
OTU_753	Arthropoda	Insecta					77.45	Published	ATTATCTTCTATTGAAAGCCATTCTGGTGGTTCAGTAGATTTAGCAATTTTTAGTTTACACATTGCTGGTGCTTCATCAATATTAGGTGCTATGAATTTTATTACTACAGTTTTAAACATGAGAGTTCCTGGTATGCATATGCACAAAATTACATTATTCACTTGAGCTATTTTTATTACTGCAATATTATTATTATTATCATTA	2	2	3	5	8	2	8	2	4	0	5	5	3	0	3	4	5	7	4	2	40	15	3	2	8	13	5	3	9	6	3	5	11	3	4	5	4	1	0	0
OTU_754	Cnidaria	Scyphozoa					74.19	Published	TCTAAGTAGTATACAATCACATTCTGGACCATCTGTAGATCTAGCTATATTTAGTCTGCATCTATCGGGAGCATCGTCGATTAGGGGAGCTATAAATTTTATAGTGACTATATTTAATAGGCGTGCTCCAGGTCTTTTTAGACATAAACTACCTCTATATGTATGAGCAGTACTTATTACAGCATTTCTACTTCTACTTTCACTT	4	0	1	3	6	1	6	5	2	3	4	2	2	3	2	15	6	3	0	1	70	26	8	7	10	12	5	7	7	10	0	0	11	2	1	1	1	0	0	0
OTU_755	Arthropoda	Insecta					71.52	Early-Release	TTTGAGCGATGTACTTTACCACCCCGGTCCTTCTGTAGATCTTGCTATATTTAGCTTACACTTGGCGGGTATATCTTCATTGCTAGGAGCAATTAACTTCATAACAACTATAGTGAATATGCGGTTGCGCTATATAACATACTTTAAAATGCCGTTGTTTGTGTGAGCAGTCTTTATAACTTCTTTTCTTTTGTTATTATCCTTA	3	2	0	0	0	0	0	0	0	0	0	1	0	0	0	0	0	0	0	0	297	100	0	0	0	0	14	12	0	0	4	3	0	1	0	1	3	6	0	0
OTU_756	Heterokontophyta	Oomycota					76.16	Private	TCTAAGTAGTATCCAAGCCCATTCTGGACCATCTGTAGATCTAGCTATCTTTAGTCTACACATTTCTGGAGCCTCATCTATTAGGGGAGCTATTAACTTTATCGTTACTATCTTCAATAGGCGCGCTCCTGGTCTATTTAGGCATAAAATCCCTCTATTTGTATGAGCTGTTCTAATTACAGCTTTCCTACTACTACTGTCTCTT	9	11	1	3	7	4	4	1	5	12	4	3	2	1	3	0	4	0	1	0	0	67	5	7	8	5	5	6	4	7	3	2	2	6	5	2	11	1	0	0
OTU_757	Rotifera	Monogononta					73.29	Published	TCTTTCTGACTCTAAATACCATAGAGGCATCTCAGTTGACCTTGCTATCTTCAGCCTCCACCTAGCAGGGATTTCTTCCATTCTTGGCAGAATTAACTTCCTGACAACTATCCTAGTGTCCCGCATATCTAATAAACTATCCCTAGACCGACTCCCACTTTTTTTGTGGTCTGTCGCCATTACGGCCGTACTACTTATCGTGAGACTT	10	4	0	0	16	11	0	10	10	0	21	9	7	3	0	0	18	11	0	0	0	0	0	1	3	0	6	3	7	11	10	19	6	6	2	0	40	55	0	0
OTU_758	Ochrophyta	Chrysophyceae	Eustigmatales				89.22	Published	TTTAAGTGGAGCTCAAGCCCACTCAGGTCCTTCGGTTGACTTGGCTATCTTCAGTCTACATTTATCAGGAGCAGCTTCAATCTTAGGTGCTATTAACTTTATTACTACTATTTTTAATATGCGTGCACCTGGAATGAGTATGCACAGATTACCATTATTTGTGTGGTCTGTTTTAATTACTGCTTTCCTACTTTTATTATCGCTT	4	10	7	11	6	12	10	2	5	7	10	2	4	10	8	3	13	3	2	3	94	33	7	18	15	17	8	13	21	12	4	4	10	8	7	6	6	17	0	0
OTU_759	Heterokontophyta	Oomycota	Pythiales				88.24	Published	TTTAGCTAGTGCACAAGCACATTCAGGAGCATCTGTAGATTTAGCTATATTTAGTTTACACTTAGCTGGGATTTCTTCAATCTTAGGTGCTATTAACTTTATTACAACTATTTTTAATATGAGAGCACCTGGATTATATTTCCACAAATTACCTTTATTTGTTTGGGCTGTTTTAATTACAGCATTCTTATTATTATTATCATTA	5	11	2	9	17	12	10	4	8	15	10	4	9	6	9	10	13	2	2	10	47	91	14	11	9	19	20	18	11	8	8	5	13	15	5	9	8	9	0	0
OTU_760	Bacillariophyta	Mediophyceae	Thalassiosirales	Skeletonemataceae			93.14	Published	TTTATCAAGTGCAACAGCTCACTCTGGAGGTTCTGTAGATTTAGCTATTTTTAGTTTACATTTATCAGGTGCGTCATCTATTTTAGGTGCTATTAATTTTATTTGTACAATTTTTAATATGCGAGTGAAAAGTTTATCTTTCCACAATCTTCCATTATTCGTATGATCTGTTTTAATAACAGCGTTTTTACTGTTATTATCTTTG	67	114	81	99	44	64	69	78	45	112	48	53	46	62	63	88	87	81	63	68	41	61	94	110	125	119	94	68	82	118	43	77	72	75	57	56	30	78	0	0
OTU_761	Heterokontophyta	Oomycota	Pythiales	Pythiaceae			92.65	Published	ATTATCAAGTGTTCAAGCACACTCAGGGCCTTCAGTAGATTTAGCTATTTTTAGTTTACATTTAGCTGGTATTTCTTCTTTATTAGGTTCAATAAATTTTATTTCAACTATTTATAATATGAGAGCTCCTGGTTTAAGTTTTCATAGATTACCTTTGTTTGTTTGGGCTGTATTAGTAACAGTTTTTTTATTATTATTAACTTTA	36	36	49	55	48	23	53	20	28	41	24	19	30	35	35	45	49	42	32	44	125	178	55	38	83	57	72	51	33	44	19	32	46	20	27	22	18	27	0	0
OTU_762	Arthropoda	Insecta					81.28	Published	ATTAAGTAGTACTATGGCTCACCCTGGAGGTGCTGTTGACTTAGCAATTTTTAGTTTACACGTATCAGGAGCTTCATCAATTTTAGGGGCTGTTAATTTTATTACTACAATATTTAATATGCGATGCCCAGGAATGACTATGCATCGTGTACCATTGTTTGTTTGGTCTGTATTAATTACTGCTTTTTTATTATTATTATCTTTA	1	0	6	5	3	1	4	2	5	3	2	1	3	3	2	6	7	9	6	3	91	117	21	17	14	17	9	4	4	8	4	1	20	13	2	3	5	7	0	0
OTU_763	Ochrophyta	Raphidophyceae					80.34	Published	ATTATCATCTATTCAAGCACATTCTGGAGCATCTGTAGATTTAGCTATTTTTAGCTTACATTTATCAGGTGCTGCCTCTATTTTAGGAGCAATTAATTTTATCGTTACCATTTTTAACATGAGAGCACCAGGGCTTTTTATGCATAAAATCCCATTATTTGTTTGAGCAGTATTAGTAACCGCATTTTTATTACTTTTATCTTTA	6	5	7	7	4	11	8	4	5	17	7	5	2	1	10	11	8	8	14	2	71	74	12	9	12	13	15	6	6	9	2	3	12	12	6	9	3	1	0	0
OTU_764	Bacillariophyta	Bacillariophyceae					80.81	Published	TTTGTCTGGAATCACAGCTCATTCAGGTGGTTCTGTTGATTTGGCAATATTTAGCTTACATTTGTCAGGAGCCGCCTCTATTTTAGGAGCAATAAATTTTATTTGTACAATTACAAACATGCGTTCAAAAAGGCTGCCGTTCCATAAATTACCTCTTTTTGTATGGTCAGTTTACATAACAGCATTTTTGTTAGTCTTATCTTTA	20	4	5	3	6	8	6	1	2	8	3	0	1	0	0	1	0	2	4	4	94	212	2	3	7	6	5	4	0	5	0	1	5	3	5	8	5	3	0	0
OTU_765	Rotifera	Monogononta	Ploima	Synchaetidae	Polyarthra	Polyarthra dolichoptera	98.97	Published	TCTGGCAGATGCTAAATATCATTCAGGTATTTCTGTTGATTTGGCGATTTTTAGTCTTCATTTAGCTTTTTTCTTCTTTTAGGAAGAATTAATTTTTTAACTACTATTATTTGTTCTCGTACTACAAAATTGATTTCTATGGATCGTTTACCTTTGTTATTATGAGCAATTTCAGTTACAGCTGTATTGTTAATTACAAGATTA	1	1	0	1	2	4	2	0	1	2	2	0	3	2	3	5	1	0	1	3	1	0	0	0	0	0	11	5	6	1	0	3	0	2	3	5	2	3	0	0
OTU_766	Annelida	Polychaeta	Spionida	Spionidae			91.5	Published	GCTATCGAGCGCAACAGCTCACTCTGGAGGTTCTGTAGATTTAGCAATATTTAGTTTACATTTATCAGGTGCGTCTTCTATTTTAGGAGCTATTAATTTCATTTGTACAATCTTCAATATGCGAGTAAAAAGTTTATCTTTTCATAATTTACCATTATTTGTGTGGTCTGTTTTAATTACTGCTTTTTTATTGTTGTTATCATTG	2408	2731	1962	2429	1906	2007	1899	2409	1364	2377	2015	2299	1424	1800	1823	2606	1891	2385	2197	1920	380	497	2119	2237	2546	2794	2470	2375	2191	2655	1627	2030	1847	1851	1747	2031	1329	2260	0	0
OTU_767	Heterokontophyta	Oomycota	Peronosporales	Peronosporaceae			94.61	Published	TTTATCAAGTGTACAAGCACATTCTGGACCTTCTGTAGACTTAGCTATTTTTAGTTTACATTTGACAGGTATTTCGTCTTTATTAGGAGCTATAAATTTTATATCAACGATTTATAATATGCGAGCTCCAGGCTTAAGTTTTCATAGATTACCTTTATTTGTTTGGTCAATTTTGATTACAGCTTTTCTTTTATTATTAACTTTA	1	2	6	7	1	2	0	1	1	7	4	4	0	0	2	15	0	0	1	0	178	42	2	1	13	6	8	14	7	2	0	3	0	2	1	7	4	1	0	0
OTU_768	Arthropoda	Insecta					78.65	Published	ATTAAGTAGCACTATGGCTCATCCTGGAGGTGCTGTTGACTTAGCAATTTTTAGTTTACACGTTTCTGGAGCCTCATCAATCTTAGGAGCCGTTAACTTTATTACTACAATATTTAACATGCGATGCCCAGGAATGACTATGCATCGGGTACCATTATTTGTTTGGTCTGTGTTAATCACTGCTTTCTTATTATTGTTATCTTTA	7	10	1	5	8	3	7	5	15	9	15	9	4	1	6	12	14	17	8	7	39	136	36	11	24	17	18	10	7	9	8	9	23	18	2	10	6	13	0	0
OTU_769	Rhodophyta	Florideophyceae					76.96	Private	CTTAAGTTCTGTTTTAGCTCATTCAGGCTGTGCTGTAGATTTAGCTATATTTAGTTTACATATAGCAGGTGTATCATCTATTGCTGGAGCTATTAATTTTATAGTGACGATTATAAATATGAGATGTCCTGGTTTGTATTTTCGTCGATTACCTTTGTTTGTATGATCTGTTTTTGTAACCGCTATCTTATTGTTATTATCATTA	0	0	2	6	21	19	14	10	0	51	21	0	3	7	2	0	0	0	0	0	0	0	8	1	15	25	4	10	3	4	0	1	4	7	18	39	28	24	0	0
OTU_770	Ochrophyta	Phaeophyceae					80.88	Published	TTTAAGTAGCATTATTGCTCACTCAGGGCCTTCGGTTGATTTAGCAATTTTTAGTTTACATTTATCTGGTGCAGCATCTATTTTAGGTTCTATTAATTTTATTACTACTACTTTTAATATGCGTAGTCCAGGTCTTTATATGCATAGATTACCTTTATATGTCTGGTCTTTATTAATAACATCTTTTCTTTTATTAATTTCATTA	2	1	2	2	3	1	2	1	1	3	4	1	1	2	1	0	3	8	1	0	15	7	2	1	6	0	4	2	1	2	3	4	0	1	1	3	0	0	0	0
OTU_771	Nematoda	Enoplea	Triplonchida				85.29	Private	TTTATCTTCTAATATAGGGCATAGTGGGAGATCAGTTGATCTTGCTATTTTTAGTCTTCATTTAGCTGGTGCTTCTTCAATTATAGGTTCAATTAATTTTATTAGAACAATTCTTAATATACGTTCAAATGGTATAACTATAGAACGAGTTTCTTTATTTGTTTGAAGAGTTGGTATTACAACATTTTTATTAGTTTTATCTTTA	0	0	0	0	0	0	0	0	0	0	4	0	62	104	0	2	0	0	0	0	0	45	3	0	0	0	0	0	0	0	0	0	0	0	0	0	0	0	0	0
OTU_772	Heterokontophyta	Oomycota					79.9	Published	TTTAAGTAGTATAGCCGCTCATTCAGGCGCTAGTGTAGATTTAGCTATTTTTAGTTTACATTTAGCTGGTGTTTCGAGTTTATTAGGTGCCATAAATTTTATATGTACTATTTTTAATATGAGAATTCAAGGAATGATTTTCCATAGATTGAGTTTATTTGTATGGGCTGTATTAATTACTGCAGTATTATTATTATTAAGTTTA	5	6	12	14	4	5	1	5	2	3	7	1	5	3	4	6	0	4	0	1	104	271	8	14	34	22	3	2	4	2	2	3	6	6	5	7	3	12	0	0
OTU_773	No Match	No Match	No Match	No Match	No Match	No Match			TCTAAGTGGTATTCGCGGTCATACCGGTTCTTCTGTTGATTTTGGTATCTTAAGTATACACGTAGCTGGTGCCTCATCAATTTTGGGTTCTATTAACATGATCGTTACGATTACCAATATGCGAGCTAAGGGAATTACGTGGTTTAGGATGCCGCTTTTCATTTGGTCAGTTATTATTACTTCGTATCTTTTAGTCATATCTCTG	16	21	20	18	14	17	24	8	13	17	8	5	2	2	4	11	19	7	4	13	28	35	9	14	7	5	25	23	13	14	2	3	9	6	13	13	19	14	0	0
OTU_774	Ochrophyta	Phaeophyceae					74.13	Private	TCTTAGTGGAATCCAAGCACACTCAGGACCTTCGGTTGACCTGGCTATTTTTAGCCTTCACCTTTCCGGAGCTGCGTCTATTCTTGGAGCAATCAATTTTATCGTTACTATCTTTAATAGACGTGCTCCAGGTCTTTTTAGACACAAGCTACCTCTATTCGTCTGATCAGTTCTCATTACAGCTTTCCTGCTCCTACTCTCACTA	6	9	6	0	6	8	9	4	8	6	5	4	0	7	4	7	8	3	1	4	61	96	16	9	20	5	27	3	2	7	3	3	6	2	2	6	2	3	0	0
OTU_775	Ochrophyta	Raphidophyceae					80.34	Published	TTTAAGTAGTATTTTATCCCATTCTGGTCCTTCTGTTGATTTAGCAATTTTTAGTTTACATTTATCTGGTGCTGCTTCAATATTAGGTGCAATTAATTTTATAACTACTGTTTTTAATATGCGTTCATTTGGTTTAGATATGCATAGAATAGCATTATTTGTTTGGGCACTTTTAATTACTTCTTTTTTATTACTTTTATCTTTG	10	14	14	15	9	14	12	4	5	11	8	3	8	8	14	4	5	4	3	6	12	47	19	22	35	14	12	13	13	16	4	0	13	1	7	6	4	13	0	0
OTU_776	Rotifera	Monogononta					84.31	Published	TCTTTCTGACTCTAAGTTTCATAGAGGCATTTCTGTAGATTTAGCTATTTTTAGTCTTCATTTAGCAGGTATCTCCTCTATTTTAGGTAGAATTAACTTTCTTACTACTATTTTAGTTTCTCGTATGACTGCCGTTTTAACTTTAGATCGCCTCCCTCTATTTTTATGATCTGTAGCTATTACTGCTGTTCTTTTAATTGTAAGGCTT	0	1	0	0	1	1	7	6	1	17	4	7	3	7	0	0	4	3	0	5	0	0	0	0	0	0	6	0	3	0	7	2	11	4	0	0	12	13	0	0
OTU_777	Heterokontophyta	Oomycota	Pythiales	Pythiaceae	Pythium	Pythium sp.	100	Published	TTTATCAAGTGTACAAGCTCACTCAGGACCTTCAGTAGATTTAGCTATTTTTAGTTTACACTTATCAGGTATCTCATCTTTATTAGGTGCTATTAATTTCTTATCAACTATTTATAACATGAGAGCTCCTGGTTTAAGCTTCCACAGATTACCATTATTCGTTTGGTCTGTATTCATTACAGCTTTCTTATTATTATTAACATTA	24	21	7	11	12	6	8	18	0	20	25	2	13	6	5	6	4	10	5	8	172	229	38	54	42	23	37	37	8	14	8	8	28	15	5	8	18	17	0	0
OTU_778	Chordata	Actinopterygii					50	Published	ATTATCTGATTCTAAATTTCATTCTGGTATTTCTGTCGATTTAGCTATTTTTTAGCTACATTTAGCTGGTATTTCTTCTATTTTAGGTAGTATTAATTTTATAACTACTATTATTTGTTCTCGTACAACAAAGATAATTAGTATAGATCGTTTACCACTAATGTTATGATCATTAGGTGTTACTGCCTTTTTATTACTAACTACTTTG	5	3	26	18	58	36	114	32	16	113	28	7	53	57	15	25	40	35	98	89	12	33	1	1	10	2	3	3	16	5	43	44	46	82	39	25	10	18	0	0
OTU_779	Ascomycota	Leotiomycetes	Leotiomycetes_order_Incertae_sedis				85.78	Published	ATTATCAGGTATTCAAAGTCATAGTGGACCAAGTGTAGATTTAGCTATATTTGGTTTACATTTATCTGGGATAAGTAGTTTATTAGGAGCAGTTAATTTTATAACGACAATATTAAACATGAGAAGTCCTGGAATAAGATTACATAAACTAGCATTATTTGGATGAGCGGTTATAGTTACTGCTGTTTTACTTTTACTATCTTTA	8	9	16	13	8	16	13	3	9	8	2	1	0	2	0	0	1	2	0	0	39	8	29	19	31	20	21	10	6	12	2	7	8	15	7	17	9	11	0	0
OTU_780	Rotifera	Monogononta	Ploima	Synchaetidae	Synchaeta		96.88	Published	TCTTTCAGATTCTAAATTTCATTCAGGAATTTCAGTAGATTTAGCTATTTTTAGTTTACATTTAGCTGGGATTTCTTCTATTATAGGAAGAAACTTTATAACTACTATTATCTGTTCTCGTACAACAAAAATAATTAGTATAGATCGTCTCCCTTTAATAATTTGAGCTTTAGGTGTAACAGCTTTTCTTTTAGTTACTACATTA	2	0	3	6	14	16	10	0	8	1	0	1	5	6	0	0	2	3	3	6	0	0	0	0	0	0	0	0	0	0	0	0	13	10	1	4	4	14	0	0
OTU_781	Heterokontophyta	Oomycota	Pythiales	Pythiaceae			93.63	Published	TTTATCAAGTGTACAAGCACATTCAGGTCCTTCTGTAGATTTAGCAATTTTTAGTTTACATTTATCAGGTATTTCTTCTTTATTAGGAGCTATAAATTTTCTTTCTACTATTTATAATATGAGAGCTCCAGGTTTAAGCTTTCACAGATTACCTCTTTTTGTATGGGCTATTTTTATTACAGCTTTTTTATTATTATTAACTTTA	2	3	46	66	4	3	0	85	3	2	113	0	0	3	1	0	0	2	1	0	6	48	9	3	2	4	12	8	7	2	4	6	4	6	1	4	6	10	0	0
OTU_782	Cnidaria	Anthozoa					79.41	Published	GTTAAGTGGAATTGTTGCACATTCAGGTGGAGCTGTAGATTTAGCTATTTTTAGTCTACATTTAGCTGGTGTATCATCGTTATTAGGTGCTATTAATTTTATAACTACTATTTTTAATATGCGTTTACCATCTATGAGTATGTACAAATTACCTTTATTTGTATGAGCTGTTTTAGTTACTGCAGTATTATTATTGTTATCTTTA	1	0	13	4	6	8	1	0	5	2	4	0	7	1	9	16	2	4	2	4	0	0	2	0	10	1	5	7	0	1	10	4	1	0	2	2	6	8	0	0
OTU_783	Arthropoda	Insecta	Coleoptera				85.78	Private	ATTATCAGGTATTACTGCACATTCTGGTGGTTCAGTAGATTTAGCAATTTTTAGTTTACATTTATCAGGAGTTTCATCAATTGCTGGTTCAATTAATTTTATGACAACAATAATTAATATGCGTGTTAAAGGTTTAACAATGTATCGTTTACCTTTATTTATTTGAGCTTTATTTTTAACTGCATTTTTATTAGTTTTAACTTTA	3	3	2	12	3	9	26	1	5	1	0	8	17	15	10	6	14	10	14	12	0	0	30	1	30	7	13	17	21	15	14	11	8	0	12	6	2	6	0	0
OTU_784	Cnidaria	Hydrozoa					81.37	Private	ATTATCAGGAATTTTAGCACATTCAGGACCTTCTGTAGATTTAGCTATTTTTAGTTTACATTTATCAGGGGCAAGTTCAATCATGGGATCTATTAATTTTATAGTTACCATTTTTAATATGAGAGCGCCAGGGTTATTTATGCATAAATTACCTTTATTTGTATGAGCTGTTTTAGTAACAACATTTTTATTATTATTATCCTTA	1	6	2	0	0	3	3	0	2	4	1	6	0	0	2	4	6	0	9	0	19	24	5	1	4	1	3	2	2	2	1	1	5	1	2	1	1	2	0	0
OTU_785	Ascomycota	Leotiomycetes					83.33	Published	ATTATCAGGTATACAAAGTCACAGTGGACCTAGTGTGGACTTAGCTATCTTCGCTCTTCATCTATCAGGGATAAGTAGTCTATTAGGAGCGATGAATTTCATAACAACTATATTAAACATGAGAAGTCCAGGAATAAGATTACACAAATTGGCCCTATTTGGATGAGCTGTAGTGGTAACAGCTGTTTTATTACTTTTATCTTTA	6	2	8	11	13	3	10	7	2	8	10	2	1	8	2	7	4	3	7	3	20	68	14	23	12	7	4	16	5	14	16	5	24	24	9	13	8	27	0	0
OTU_786	Ochrophyta	Raphidophyceae					81.2	Published	ATTATCTGGTATTCAAGCGCACTCAGGTGCTTCTGTAGACTTAGCTATCTTTAGCTTACACGTATCAGGTGCTTCTTCTATTGCAGGTTCAATTAATTTTATTACAACTATTTTAAATATGAGATCTCGCGGGATGTACTTATACAAATTACCGTTATTCTGTTGAGCGGTTTTAGTTACTGCATTTTTGTTATTATTGTCTTTA	4	12	6	5	16	5	15	17	2	19	10	6	5	10	8	16	14	13	6	12	24	32	30	7	12	7	22	6	15	7	7	3	13	23	9	13	4	5	0	0
OTU_787	Arthropoda	Insecta					74.47	Private	ACTAAGTGGAATTGAAGCCCACTCTGGCCCTGCGGTTGATTTTGGTATCTTCAGCCTACACCTTGCGGGTATCTCCTCCCTCCTAGGTGCCATTAACTTCATCGTTACTATCTTTAATATGCGCGCACAAGGTATGACTCTACACACTATGCCCCTGTTTGTTTGATCTATCCTTATTACCGCGTTCTTACTCCTGCTATCCCTT	9	8	4	3	4	7	7	8	0	15	7	2	5	1	2	6	10	4	1	0	67	172	2	9	24	9	7	13	7	1	7	1	7	2	5	4	7	2	0	0
OTU_788	Rotifera	Monogononta	Ploima	Synchaetidae	Synchaeta		97.95	Published	ATTATCTGATTCTAAATTCCATTCTGGTATTTCTGTCGATCTTGCTATTTTTAGTTTACATATTGCTGGAATCTCTTCTATTTTAGGTAGTATTAATTTTATGACTACTATTATTTGTTCACGTACTACTAAAATAGTTAGAATAGATCGCCTCCCTTTAATAATTTGATCTTTAGGGGTAACTGCTTTTCTACTAGTAACAACTTTA	0	0	12	5	0	0	0	0	0	0	0	0	0	0	0	0	0	0	0	0	0	0	0	0	0	0	0	0	0	0	0	0	0	0	0	0	0	0	0	0
OTU_789	Basidiomycota						85.71	Private	TTTAGCAGGTATCCAATCACACTCAGGAGGGTCAGTTGATCTAGCGATCTTTAGTCTTCACTTAGCAGGAATCTCATCAATGTTAGGAGCAATGAACTTTATTACTACAATTATCAATATGCGAAACCCAGGAATGACTCTACACAAACTTCCTTTATTCTGTTGAGCTATCATGGTAACTGCTATCTTACTATTACTATCATTA	0	2	5	3	0	2	1	0	4	4	2	0	4	2	9	16	4	0	5	5	73	205	3	18	0	1	5	26	13	5	1	7	19	9	4	19	7	5	0	0
OTU_790	Rotifera	Monogononta	Ploima	Brachionidae	Keratella		97.4	Published	TCTCTCCGACTCTAAGTATCATTCTGGTATTTCAGTTGACTTAGCTATTTTCAGTCTTCATTTAGCAGGAATTTCTTCCATTCTTGGTAGTATTAATTTTCTTACTACTATCGTTTGCTCTCGCACAACTAAGGTTATTTCTCTTGATCGTATGCCTCTAATGCTTTGGGCTATCTCTGTTACTGCTATTCTTTTGATTAGGTTG	140	111	219	288	298	356	187	140	228	242	128	234	405	486	74	92	349	350	186	179	0	0	63	47	27	13	54	42	209	277	199	252	292	325	1425	1812	369	482	0	0
OTU_791	Arthropoda	Collembola					77.08	Private	TTTAGCTGGTGTTGCTTCTCATTCAGGAGGCTCAGTTGATTTAGCTATTTTTAGCTTACATTTATCAGGTGTATCATCAATTGCTGGTGCTATTAATTTTATGACAACTATTATCAATATGCGTGTTAAAGGTTTAACTATGTATCGTATGCCTCTTTTTATTTGATCCTTATTTTTAACTGCTTTTTTACTTGTTATGACTTTG	0	0	0	0	15	32	0	0	1	0	0	1	0	0	1	1	29	19	0	0	0	0	24	10	52	19	0	0	0	0	0	0	1	0	10	15	1	4	0	0
OTU_792	Rotifera	Monogononta					81.03	Published	TTTATCTGATTCTAAGTATCATAGAGGTATCTCTGTAGATCTCGCTATTTTTAGTCTCCACATTGCTGGTGTTTCTTCAATTTTAGGTAGAATTAATTTTTTAAGAACTGTTTTATGCTCTCGTAACAGAAATTCTTTTTCACTTGATCGTATACCTCTTATGCTTTGAGCTATTAGAGTAACTGCTATTCTCTTAATTACAAGATTA	0	1	70	26	131	146	0	0	1	0	0	0	2	0	0	0	0	0	0	0	0	0	0	0	0	0	11	0	0	4	0	0	0	0	0	0	0	0	0	0
OTU_793	Arthropoda	Insecta	Lepidoptera				86.52	Published	ATTAAGTGGTGCAATTGCACATGCAGGACCTTCTGTCGATTTTGCTATTTTTAGTTTACATATTGCAGGAGCTTCTTCTATTATGGGTGCAATTAATTTTATTACAACTATTATTAATATGCGTCACCCTGGATGTAGTTTTCATAACATGAATTTATTCGTTTGGGCTGTATTTATTACAGCAATTTTATTATTATTATCTTTA	6	1	1	5	7	6	0	6	7	13	12	3	2	3	5	1	4	3	2	1	39	224	10	0	21	16	6	5	4	5	7	1	1	6	4	5	1	3	0	0
OTU_794	Ochrophyta	Phaeophyceae					79.6	Published	ATTAAGTGGAATCCAAGCGCATTCGGGCCCTGCTGTAGATTTAGCAATTTTTAGCTTACATATTGCGGGTGCTTCCTCTATTTTAGGTGCAATTAATTTTATAGTAACAATTATGAATATGCGTGCACGTGGATTAACATTTCATCGTTTACCATTATTTGTTTGATCTGTATTTATTACTGCATTTTTACTTTTATTATCTTTA	1	7	3	5	0	1	1	1	2	0	3	1	0	1	1	10	2	2	1	1	0	192	1	2	6	12	0	0	0	5	5	0	0	1	3	3	0	1	0	0
OTU_795	Arthropoda	Collembola	Neelipleona	Neelidae	Megalothorax	Megalothorax willemi L6	100	Published	CCTATCCTCGAATGTCTCTCACTCCGGAGCATCAGTTGATTTAACTATTTTTAGACTTCATTTAGCCGGAATGTCATCTATTTTAGGAGCTATTAATTTTATTACTACTATTATCAATATACGCACCCCAGGAATAAGATGGGACCAAATTCCCTTATTTATTTGATCCGTGTTTATTACATCAATTCTTCTGTTATTATCCCTA	31	41	0	0	0	2	0	2	220	0	2	101	0	0	0	0	0	0	0	0	0	0	7	1	0	0	0	0	0	0	0	0	0	0	0	5	0	3	0	0
OTU_796	Ascomycota	Leotiomycetes	Leotiomycetes_order_Incertae_sedis	Leotiomycetes_family_incertae_sedis	Leohumicola		96.08	Published	GTTAAGTGGAGTACAAAGTCACAGTGGACCAAGTGTTGATTTAGCAATCTTTGCTTTACATTTATCTGGTATAAGTAGTTTATTAGGTGCAATTAATTTTATAACTACTATACTTAATATGAGAAGTCCTGGTATAAGATTACATAAATTAGCTTTATTTGGATGAGCTGTAGTAGTTACTGCTGTATTATTATTATTATCATTA	6	9	15	11	1	5	0	8	3	10	7	1	1	6	8	9	7	9	6	9	111	60	18	11	35	20	8	11	4	10	4	3	1	3	9	6	3	12	0	0
OTU_797	Heterokontophyta	Oomycota	Saprolegniales	Leptolegniaceae			93.14	Published	TTTATCTAGTATACAAGCACATTCAGGTCCTTCAGTTGATTTAGCTATTTTTAGCTTACATTTAGCAGGTATCTCATCATTATTAGGTGCAATAAATTTTATAACTACTATTTATAATATGAGATCTCCTGGATTATCTTTTCATAAATTACCTTTATTTGTTTGGTCTGTATTTATTACAGCTATATTGTTATTATTAAGTTTA	11	12	11	9	3	8	3	11	0	6	4	0	5	1	7	2	1	5	3	6	58	83	16	18	22	6	28	18	9	6	10	12	11	8	3	5	8	14	0	0
OTU_798	Rotifera	Monogononta	Ploima	Synchaetidae	Synchaeta		97.35	Published	ATTATCTGATTCTAAATTTCATTCTGGTATTTCTGTTGATTTAGCATTTTCAGTTTACATTTAGCTGGTATTTCTATTTTAGGTAGTATTAATTTTATAACTACTATTATTTGTTCTCGTACAACAAAGATAATTAGTATAGATCGTTTACCACTAATGTTATGATCATTAGGTGTTACTGCCTTTTTTATTACTAACTACTTTG	15	17	21	15	56	58	26	22	14	28	20	11	53	45	11	9	47	40	40	37	127	175	3	4	0	0	3	10	15	18	25	39	71	52	39	47	16	39	0	0
OTU_799	Heterokontophyta	Oomycota					76.26	Published	TTTAAGTAGTATAGAAGCGCATTCTGGACCGGCAGTTGATTTAGCCATTTTTAGTTTGCACCTAGCTGGTATATCTTCATTATTAGGCGCCATCAATTTCATAACAACGATCTTTAATATGAAATTACCGCATTTAACAATGTACAAAACACCGCTTTTTGTATGGGCGGTTTTAATTACAGCCGTTTTGTTGTTATTGTCCTTA	10	2	7	5	3	5	0	17	6	16	6	2	5	0	2	0	0	0	0	0	73	212	0	0	0	0	3	4	0	0	0	3	6	11	5	13	9	1	0	0
OTU_800	Heterokontophyta	Oomycota					76.96	Published	ACTTTCATCTATTCAAGCACATTCAGGACCTTCAGTAGATTTAGCTATTTTTAGTTTCCACCTTTCAGGAACTAGTTCTATTTTAGGATCAATTAACTTTATTGTAACTATTTTTAATATGAGAGCACCAGGTCTTTTCATGCACAAACTTCCACTTTTTGTATGAGCAGTTTTAATTACTACAGTTCTTTTATTATTATCTTTA	5	8	1	4	4	0	13	4	3	3	11	4	0	1	4	5	0	3	4	2	14	59	6	6	5	11	3	2	3	8	6	0	8	3	2	5	11	3	0	0
OTU_801	Arthropoda	Insecta					75.76	Published	ATTGTCATCATCAGTGGCACATTCTGGTCCATCTGTAGATAGAGCAATTTTCTCATTGCATCTAGCAGGAGCATCTTCAATTTTGGGAGCACTAAACTTTATTACAACAATTATTAATATGCGTGCACCAGGTATGTCAATGCACCGTAGACCAAGATTCGTGTAGTCAGTACTTATTACAGCAGTAAGACTTTTGTTGTCATTG	11	11	1	3	6	3	8	9	3	11	4	2	7	7	8	16	2	4	7	11	143	56	6	7	23	6	8	1	11	5	6	7	17	2	8	19	1	3	0	0
OTU_802	Arthropoda	Insecta	Lepidoptera				88.76	Published	GTTAAGTTCTGTACAAGCACACTCAGGTCCTTCTGTAGATTTAGCTATTTTTAGCTTACATTTAGCAGGTGCTTCGTCTATTTTAGGAGCAATCAATTTTATTACAACTATTCTTAATATGCGTGCTCCTGGTATGTCGATGCATCGCTTACCTTTATTTGTATGGGCTGTATTAATTACCGCATTTTTACTTCTACTATCTTTA	3	2	5	1	5	2	4	5	9	4	2	1	2	3	1	1	0	4	4	1	12	18	10	4	2	7	4	3	4	4	3	2	12	2	6	9	0	8	0	0
OTU_803	Arthropoda	Insecta					77.94	Published	TTTATCAGATACTCCTTATCATTCTGGACCAGCAGTTGATTTATCAATTCTTTCTTTACATGTAGCTGGATTTTCTAGTTTAATGGGTGCTTTAAATTTAATTACTACTACAATTAATATGAGAGCTCCTGGTATGACTTTTGATAAATTACCTTTATTTGTTTGGGCAGTATTCTTAACAGCTTGGTTATTATTATTAGCTTTA	10	2	8	7	3	8	6	12	8	3	17	0	9	18	11	22	10	17	9	8	44	104	13	4	17	3	21	20	7	10	2	8	11	6	11	10	6	7	0	0
OTU_804	Heterokontophyta	Oomycota					77.11	Published	ATTATCTGGTATTTTAGCACATTCAGGACCATCTGTAGATTTAGCTATTTTTAGTTTACATCTTTCAGGAGCTAGCTCTATTATGGGTTCAATTAATTTTATTGTTACAATTTTTAATATGCGTGCACCAGGGCTTTTTATGCATAAAATTCCACTCTTTGTTTGAGCCGTATTAATTACATCTTTTCTTTTATTATTATCACTC	6	4	5	3	7	2	5	2	2	1	7	0	0	2	0	7	4	1	2	1	79	31	11	2	7	4	12	10	6	2	3	5	6	1	0	8	3	2	0	0
OTU_805	Ochrophyta	Phaeophyceae					77.27	Published	TTTAAGTGGTATTGAAGCTCATTCTGGAGCTGCAGTAGATTTCGGTATTTTTAGCCTACATTTAGCCGGTGCTTCGTCAATTTTAGGAGCTATTAATTTTATAGTAACTATTTGAAATATGCGTGCTCCTGGTTTAGCATTTCATGCTCTTCCTTTATTTGCATGATCTGTTTTAATAACCGCAATTTTATTATTACTTTCTCTG	3	1	4	9	1	3	4	3	1	9	2	1	1	3	0	3	2	1	4	0	63	156	10	12	4	11	12	8	3	3	1	6	9	15	2	1	1	5	0	0
OTU_806	Ochrophyta	Phaeophyceae					80.39	Published	TTTAAGTGGTATTGAAGCACATTCAGGACCTTCTGTTGATTTAGCTATATTTAGTCTACATTTATCTGGTGCATCATCAATAGCGGGTTCTATAAATTTTATAGTTACAATTATTAATATGAGAGCTAAAAATCTAACTTTTTATAGATTACCACTATTCGTATGATCTGTATTTATTACAGCCTTTTTATTATTATTATCTTTA	6	8	10	4	4	10	11	4	4	9	4	3	5	3	6	11	2	3	0	2	99	74	9	15	17	20	27	14	7	7	3	2	12	3	6	7	2	7	0	0
OTU_807	Ascomycota	Leotiomycetes	Leotiomycetes_order_Incertae_sedis	Leotiomycetes_family_incertae_sedis			91.67	Published	GTTAAGTGGAGTACAAAGTCACAGTGGACCAAGTGTTGACTTAGCTATCTTTGCTTTACATCTATCTGGTATTAGTAGTTTATTAGGTGCAGTTAACTTTATAACAACTATACTTAATATGAGAAGTCCAGGTATAAGATTACACAAATTAGCTTTATTCGGCTGAGCAGTAGTTGTTACTGCTGTATTGTTATTATTATCATTA	8	10	2	19	13	13	3	3	21	3	2	4	22	7	4	8	19	1	3	5	112	3	10	7	26	15	25	0	2	3	3	5	4	6	10	11	4	19	0	0
OTU_808	Arthropoda	Insecta	Coleoptera				91.79	Private	TTTATCTAGTATTGTTGCACATTCAGGTGGTTCAGTAGATTTAGCTATTTTTAGTTTACATTTAGCTGGTATTTCGTCAATAGCTGGTGCTATAAATTTTATGACAACAATTATAAATATGCGTGTAAAAGGTATGACTATGTATAGAATACCTTTATTTATTTGAGCTGTTTTTATTACAGCTTTTTTATTAGTTTTTACATTA	3	5	5	1	12	1	10	4	4	14	11	3	10	2	0	1	4	3	10	11	0	0	14	3	11	7	11	3	7	4	2	1	4	15	5	0	3	4	0	0
OTU_809	Rhodophyta	Bangiophyceae					76.72	Published	TTTGTCAAGTGTTGAAGCTCATTCAGGACCCGCAGTTGATTTAGCAATATTTAGTTTGCATATTGCAGGTGCTTCTTCTATTGCAGGTTCTATTAATTTTATTGTTACTATTTTAAATTCTCGAGTTCTTGGAATGCATTATCATAGAATTCCTTTATTTTTATGAGCTTTATTTATTACTGCTGTTTTGTTATTATTGTCTTTA	12	12	9	1	8	0	14	10	4	4	9	5	0	3	6	4	6	2	5	0	0	0	16	10	13	12	19	27	8	10	3	2	11	12	16	17	20	30	0	0
OTU_810	Heterokontophyta	Oomycota					79.9	Published	ATTAGCTTCTATAGGATTCCACTCAGGAGGTTCAGTAGATTTAGCTATTTTTAGTTTACACTTAGCAGGTATATCATCTATATTAGGTACAGTTAACTTTATAACAACTATATTTAATATGAGAGCCGCAGGTATGACTATGCACAGATTACCTCTTTTCGTTTGATCTGTTTTAATTACTGCTTTCTTATTAATATTATCATTA	4	2	2	5	8	3	3	2	1	11	5	0	2	3	4	5	2	9	3	10	10	13	5	12	14	4	17	7	2	4	1	4	7	4	1	3	0	5	0	0
OTU_811	Bacillariophyta	Mediophyceae	Thalassiosirales				86.57	Published	GTTGTCCAGTGCAACAGCTCACTCTGGCGGTTCTGTAGATTTGGCTATTTTTAGTTTACATTTATCAGGCGCATCGTCTATTTTAGGTGCTATAAATTTTATTTGTACAATTTTTAATATGCGAGTGAAAAGTTTATCTTTTCATAATTTACCATTATTTGTGTGGTCTGTTTTAATTACTGCTTTTTTATTGTTGTTATCATTG	60	74	79	88	47	41	56	101	44	90	57	75	40	50	61	104	92	107	78	116	12	9	83	55	93	121	78	88	81	106	60	92	66	73	78	45	20	80	0	0
OTU_812	Proteobacteria	Alphaproteobacteria					74.75	Private	TTTAAGTAATTTGTCAGGTCATCCTGGTGCTGCCGTTGATATGGCGATATTTAGCCTGCATCTTGCAGGTATGTCCTCTATTTTAGGGGCAATCAACATGATTGTAACTATATTTAACATGCGTGCTCCCGGAATGGGAATGTTCAAATTACCTTTATTTGTTTGGTCTATACTTATTACTGCATTTCTGCTTATATTAGCTCTA	3	2	7	10	2	5	6	7	5	6	9	1	3	4	3	3	3	2	2	4	31	1	35	29	21	28	19	25	17	9	20	9	17	17	17	10	11	18	0	0
OTU_813	Cnidaria	Scyphozoa					80.88	Published	GTTAGCTTCTATTGAAAGTCATTCAGGTGGTTCAGTAGATTTAGCTATATTTAGTTTACATTTAGCAGGAGCTTCCTCTATATTGGGAGCAATGAATTTTATAACAACAGTATTAAATATGAGAGCTCCTAATTTAAAAATGCATAGAATACCTCTGTTTGTGTGAGCTGTTTTTATAACTGCAATATTATTATTATTATCTTTA	9	0	13	17	15	13	17	5	9	10	7	3	2	2	4	0	3	7	7	2	32	51	4	14	9	13	11	8	1	4	2	6	17	0	1	6	14	2	0	0
OTU_814	Ascomycota	Leotiomycetes	Leotiomycetes_order_Incertae_sedis	Leotiomycetes_family_incertae_sedis			93.03	Published	TCTAAGTGGAGTACAAAGTCACAGTGGGCCAAGTGTTGATTTAGCTATATTTGCATTACACTTATCAGGTATAAGTAGTTTATTAGGTGCAGTTAACTTTATAACTACTATATTAAATATGCGAAGTCCTGGTATTAAATTACACAAATTAGCTTTATTTGGATGAGCTGTAGTTGTTATAGCTGTATTATTATTATTATCATTA	0	0	0	0	0	0	0	0	0	0	0	0	0	0	0	0	0	0	0	0	397	0	0	0	0	0	0	0	0	0	0	0	0	0	0	0	0	0	0	0
OTU_815	Cnidaria	Hydrozoa					76.96	Published	GCTTTCAAGTATTCAAGCACATTCAGGACCATCTGTAGATTTTGCTATATTTAGCTTACATTTATCAGGAGCAAGTTCGATTATGGGGTCTATTAATTTTATTGTAACAGTTATAAATATGAGAGCACCTGGAATTTTTATGCATAAGATGTCACTTTTTGCGTGATCAATTTTTGTAACATCATTTTTATTATTATTATCATTA	0	5	4	0	1	2	2	6	2	7	4	3	0	0	0	3	0	1	4	0	30	37	11	9	3	6	10	0	8	5	0	0	1	1	0	4	2	2	0	0
OTU_816	Bacillariophyta	Mediophyceae					81.37	Published	TTTATCTAGTATAACAGCACATTCAGGAGGATCTGTAGACTTAGCTATTTTTAGTCTTCACTTATCAGGAGCTTCTTCTATTTTAGGAGCTATTAACTTTATTTGTACTATTTTCAACATGCGTACAGATGGTTTACCTTTCCATAAACTTCCACTATTCGTTTGGTCTGTTCTTATTACCGCAGTGTTACTACTTTTATCTTTA	6	1	5	2	13	5	10	3	13	14	5	1	0	9	5	14	7	12	10	6	0	1	26	7	1	9	5	15	6	6	4	7	12	12	3	11	2	0	0	0
OTU_817	No Match	No Match	No Match	No Match	No Match	No Match			TCTGTCAGGGGTGGAAGCGCACTCGGGGGGTTCAGTGGATCTAGCAATATTTAGCTTACATCTAGCGGGGGTGTCCTCGTTACTAGGGGCAATAAACTTTATAGCCACTATATTAAACATGAGAACACCAAAGATGACAATGCACGAAATGCCGCTGTTCGTGTGGGGTATATTAGTGACAGCAATATTACTAGTGCTAGCGCTG	0	0	0	0	0	0	0	0	0	0	5	0	0	0	0	0	0	0	0	0	0	0	0	0	0	53	355	0	0	0	0	0	0	0	0	0	1	0	0	0
OTU_818	Rotifera	Monogononta					84.82	Published	TCTGTCTGATGCTAAGTATCATTCTGGTATTTCTGTTGATCTTGCTATTTTCAGTCTTCATTTAGCTGGTGTCTCTTCTATTTTAGGTAGAATCAATTTACTACTATTGTGTGTTCTCGTACTACTAAGCTAATCTCTTTGGATCGTTTACCTTTATTACTATGGGCTATCTCTATTACTGCTATCTTACTTATTACAAGACTT	278	249	1203	1295	326	302	2675	1080	1010	3153	1205	872	3435	4057	599	916	3057	2506	582	549	1	0	420	466	0	0	548	461	1047	1201	115	132	1521	1670	407	449	805	742	0	0
OTU_819	Porifera	Demospongiae					81.72	Published	ACTATCATCTGTAGAATTCCATTCTGGAGGAGCTGTAGATTTAGCGATCTTCAGTTTACATTTAGCGGGAATAAGTTCAATATTAGGAGCGAGTAATTTTATTACTACAATCTTAAATATGAGAAGTCCAGGAATGACACTTCATAAATTACCCTTATTTGTATGAGCAGTATTAATAACAGCAGTGTTATTATTATTATCATTA	0	0	0	0	1	0	0	0	0	6	0	0	0	0	1	0	0	0	0	0	0	0	1	0	0	1	4	0	0	0	0	0	0	0	0	0	0	0	0	0
OTU_820	Rotifera	Monogononta	Ploima	Brachionidae	Keratella	Keratella cochlearis	98.41	Published	TCTCTCCGACTCTAAGTATCATTCTGGTATTTCAGTTGACTTAGCTATTTTCAGTCTTCATTTAGCAGGAATTTCTTCCATTCTTGGTAGGATTAATTTTCTTACTACTATCGTTTGCTCTCGCACAACTAAGGTTATTTCTCTTGATCCTCCTCTAATGCTTTGGGCTATCTCTGTTACTGCTATTCTTTTGATTACTAGGTTG	219	237	1977	2536	646	673	1933	220	442	2170	278	397	697	845	128	163	660	646	348	342	0	0	66	64	53	40	117	87	20	26	1754	1750	541	569	974	1034	3519	4295	0	0
OTU_821	Bacillariophyta	Mediophyceae	Thalassiosirales	Skeletonemataceae	Skeletonema	Skeletonema costatum	100	Published	TTTATCAAGTGCAACAGCTCACTCTGGGGGTTCAGTAGATTTAGCATATTTAGTTTACACTTATCAGGTGCGTCTATTTTAGGTGCTATTAACTTCATTTGTACTATTTTTAATATGCGAGTAAAAAGTTTATCTTTTCATAATCTTCCTCTATTCGTATGATCTGTTTTAATAACAGCGTTTTTACTGTTATTATCTTTG	682	642	503	505	597	484	521	466	392	698	588	346	234	348	350	365	586	499	326	317	157	359	547	449	255	427	533	453	349	369	250	389	406	441	341	411	367	511	0	0
OTU_822	Arthropoda	Insecta					78.92	Published	TCTTTCTAGTATTACTGCTCATTCTGGTGGTTCTGTTGATTTGGCTATTTTTAGTTTACATCTATCTGGTGTTTCTTCTATTGCTGGTTCAATTAATTTTATGACAACAATAATAAATATGCGTGTAAAAGgtttaactttatatcgtttacctttatttatttgatctttatttttaactgcttttttattagttttaacttta	19	6	1	11	1	0	1	11	15	1	6	7	31	14	4	2	0	2	4	10	118	12	0	1	0	5	1	9	14	25	2	2	14	9	8	1	2	1	0	0
OTU_823	No Match	No Match	No Match	No Match	No Match	No Match			AGTGATAAACTCGTGCCAGCCACCGCGGTTATACGAGAGGCCCAAGTTGATGAATTACGGCGTAAAGAGTGGTTAAGCTAAAATTAAAACTAAAGCCGAACACCCCCAAAGCTGTTATACGCATCCGGAGGTGAGAAGTTCAACCACGAAGGTGGCTTTATCTAACCTGAACCCACGAAAGCTACGGCACAAACTGGGATTAGATAC	8	4	14	3	7	11	3	3	5	2	1	0	7	5	10	13	3	6	2	8	0	7	3	13	2	2	6	7	10	9	11	6	5	7	8	5	16	24	10	0
OTU_824	Heterokontophyta	Oomycota	Pythiales	Pythiaceae			94.61	Published	TTTATCTAGTGTTCAAGCACACTCTGGACCTTCAGTAGATTTAGCTATTTTTAGTTTACATTTATCAGGTATTTCATCTTTATTAGGAGCTATTAATTTTTTATCAACTATTTATAATATGAGAGCTCCTGGATTAAGTTTTCATAGATTACCTCTATTTGTGTGGGCTGTTTTTATTACTGCTTTTTTATTATTATTAACTTTA	5	0	7	11	4	4	9	5	3	4	11	9	3	3	6	8	10	1	0	3	69	73	9	5	12	20	11	14	9	11	9	3	17	21	5	10	11	5	0	0
OTU_825	Ascomycota	Leotiomycetes	Leotiomycetes_order_Incertae_sedis	Leotiomycetes_family_incertae_sedis			91.18	Published	ATTAAGTGGAATACAAAGTCACAGTGGTCCTAGTGTTGATTTAGCTATATTTGCCTTACATTTATCAGGTATAAGTAGTTTATTAGGAGCAGTTAACTTTATAACTACTATACTTAACATGAGAAGTCCAGGTATTAGATTACATAAATTAGCTTTATTTGGATGAGCTGTAGTTGTTACAGCTGTATTATTGTTACTATCATTA	25	19	2	11	3	3	15	5	9	4	2	8	3	3	14	15	17	10	4	2	0	102	0	7	7	6	1	6	12	28	17	10	4	8	4	0	0	0	0	0
OTU_826	Arthropoda	Insecta					81.18	Private	ACTTGCTAGCATAGAGTACCACTCAGGTGGTTCTGTAGACTTGGCTATCTTTAGTTTACATTTAGCAGGGATTAGCTCAATCTTAGGTGCTTCTAATTTTATTACAACTATCCTTAATATGAGAGCCCCTGGTATGACTTTACATAGACTACCTCTATTTGTATGAGCTGTATTAATTACTGCTGTATTATTACTACTTTCTTTA	6	0	0	2	0	3	13	2	7	3	4	5	0	1	3	5	6	5	3	2	5	8	2	8	5	2	4	4	8	8	5	4	0	7	1	1	3	5	0	0
OTU_827	Ochrophyta	Phaeophyceae					77.61	Published	ATTATCAGGAATTCAAGCGCACTCAGGACCTTCTGTAGATTTAGCTATTTTTAGCTTACATTTATCAGGAGCTAGTTCTATTATGGGATCAATCAATTTTATTGTGACAATCTTTAATATGAGAGCGCCAGGAATGTTTATGTACAAAATGCCACTTTTTGCATGAGCACTTCTTATTACAGCATTCTTATTATTATCGTTA	40	32	35	23	58	55	61	34	29	62	32	19	27	28	27	46	23	37	20	15	417	310	59	52	111	70	41	46	44	30	29	20	62	42	34	34	42	31	0	0
OTU_828	Arthropoda	Insecta					79.84	Private	ATTATCTTCTATTGGTTTCCATTCAGGGGGATCAGTAGATTTAGCTATTTTCAGTTTACATTTAGCAGGTATTTCAAGTATGCTTGGTGCTATTAATTTTATTACAACAATTTTAAATATGCGTGCACCAGGAATGGGACTTCACGCAATGCCACTTTTTGTATGGGCAATATTTATTACAGCTATTTTATTATTATTATCATTA	1	2	4	4	7	9	5	1	8	2	5	6	5	6	5	5	6	11	17	13	14	9	2	1	4	0	4	8	21	12	3	2	5	7	1	0	12	10	0	0
OTU_829	Heterokontophyta	Oomycota	Pythiales	Pythiaceae			90.2	Published	ATTATCAAGTGTTCAAGCCCATTCTGGACCTTCAGTAGATTTAGCAATCTTTAGTTTGCATCTATCAGGTATTTCATCCCTATTAGGTGCGATCAATTTTTTATCGACTATTTATAATATGAGAGCTCCTGGATTAAGTTTTCATAGATTACCTTTATTCGTATGGGCTGTTTTTATTACTGCTTTTCTATTATTATTAACTTTA	10	12	8	6	15	20	14	13	7	15	10	0	13	19	14	37	7	20	18	12	3	3	2	1	3	2	3	4	1	6	3	8	2	6	4	6	19	1	0	0
OTU_830	Arthropoda	Insecta	Diptera	Chironomidae	Cryptochironomus	Cryptochironomus rostratus	100	Published	TTTATCTGCTGCTATTGCTCACAGAGGGGCATCAGTAGATTTAGCTATTTTCTCCCTTCATTTAGCGGGAGTATCTTCTATTTTAGGATCTGTAAATTTTATTACTACAGTAATTAATATACGAGCAAATGGAATTACTTTAGACCGAATACCTTTATTTGTTTGATCTGTTGTAATTACAACAGTTCTTCTTCTTCTGTCTCTC	14	1	1	4	2	11	2	3	6	5	9	6	9	4	3	13	0	0	2	6	78	21	8	18	12	11	27	16	6	6	7	2	4	12	0	12	8	6	0	0
OTU_831	Arthropoda	Insecta					78.69	Private	ACTTTCAAGTGTGCAAGCACATTCAGGGCCATCTGTAGATTTTGCAATTTTTAGTTTACACTTATCAGGAGCAAGTTCTATTATGGGGTCAATTAATTTTATTGTAACAATTATTAATATGAGAGCGCCAGGTATTTTTATGCATAAAATGCCATTATTTGCATGATCTATGTTTGTTACATCTTTCTTATTATTATTATCATTA	2	3	7	5	16	11	4	0	2	11	5	0	3	5	0	1	3	6	0	1	61	19	1	0	2	0	5	5	0	8	0	3	4	0	3	1	2	1	0	0
OTU_832	Arthropoda	Insecta	Diptera	Chironomidae	Cricotopus		100	Private	TCTTTCTTCAGGAATCGCGCATGCCGGAGCTTCTGTTGATTTAGCTATTTTTTCACTTCATTTAGCCGGTATTTCCAGTATTTTAGGGGCAGTAAATTTTATTACTACTGTAATTAATATACGATCAGAAGGGATTACTTTAGACCGAATACCTTTATTTGTTTGATCAGTAATTATTACCGCAATTCTATTGTTATTATCTTTA	17	7	1	3	17	6	25	3	1	5	7	2	1	5	4	2	5	0	7	8	33	14	10	12	6	5	5	20	4	4	12	3	19	8	2	0	7	6	0	0
OTU_833	Ochrophyta	Phaeophyceae					78.79	Early-Release	ACTAAGTAGTATTCAAGCGCATTCAGGACCGTCTGTTGATCTTGCTATTTTTAGTCTACATCTTTCTGGTGCTTCTTCGATTATGGGAGCTATTAACTTTATTGCAACCATCTTTAATATGCGTGCGCCCGGAATGTTTATGCATAAAATGCCACTTTTTGTTTGATCAGTGCTGATTACAGCTTTCCTACTCCTACTATCACTA	16	13	5	3	3	9	10	1	0	2	4	0	3	5	0	4	3	0	7	5	58	57	18	11	15	12	11	11	8	4	0	4	10	3	5	6	2	5	0	0
OTU_834	Ochrophyta	Raphidophyceae					77.78	Published	TTTAAGTAGTATTCAAGCTCATTCAGGACCTGCCGTAGATTTAGCGATTTTTAGTTTACATCTATCGGGTGCTTCATCTATTATGGGAGCTATTAATTTTATTGTAACTGTTGCTAATATGCGAGCAGTTGGTATGTTTATGCATAAAATTAATTTATATGTTTGAGCTGTATTAATTACGGCTTTCCTTTTACTATTATCACTT	3	8	3	3	3	1	3	12	9	2	2	3	2	6	5	5	4	3	1	1	9	95	3	10	17	8	7	0	0	2	4	2	7	2	7	3	5	1	0	0
OTU_835	Ochrophyta	Phaeophyceae					77.45	Private	ATTAAGCAGTATAACAAGTCACTCTGGTGGTGCTGTAGATTTAGCTATTTTTAGCTTACATCTTTCAGGTGCTAGTAGTATACTTGGTGCAATTAATTTTATCACAACTATTTTTAATATGAGAGGTCCTGGGATGACTATGCATAGACTTCCTCTTTTTGTATGGGCTGTACTTATTACTGCTTTCCTATTATTACTCTCTCTT	24	5	6	5	7	3	4	3	14	15	9	2	4	6	15	6	2	4	10	2	31	25	3	6	6	9	5	16	7	8	2	1	6	4	5	5	6	7	0	0
OTU_836	Annelida	Clitellata	Crassiclitellata	Lumbricidae	Lumbricus	Lumbricus rubellus L1	100	Published	TCTAGCTAGAAATCTCGCTCATGCGGGGCCATCAGTAGATTTAGCTATTTTCTCCCTACATCTAGCTGGAGCATCCTCTATTCTAGGAGCTATTAACTTTATTACCACTGTAATCAATATACGATGAAGGGGTCTACGGCTGGAACGAATTCCTCTATTTGTATGAGCTGTACTAATTACAGTAGTTCTCCTTCTTCTATCCCTA	8	0	1	4	0	1	3	2	5	1	3	0	0	1	1	2	0	0	4	1	293	7	0	0	0	1	5	3	0	2	5	13	12	7	1	1	0	1	0	0
OTU_837	Arthropoda	Insecta	Lepidoptera				87.64	Private	GTTATCTAGTATTCAAGCTCATTCAGGTGCGTCTGTTGATTTAGCTATTTTTAGTTTACACTTAGCTGGTATTTCATCCATTTTAGGTGCAGTTAATTTCATTACAACTATTTGTAATATGAGACCAGAAAAAATGAGTATGCATTTATTACCTTTATTTGTTTGGGCTGTTTTAATTACAGCAGTTTTATTATTATTATCTTTA	17	0	5	7	5	9	8	5	5	4	2	3	12	6	8	2	1	7	0	4	25	50	10	5	15	9	17	5	8	9	4	7	4	10	5	4	4	9	0	0
OTU_838	Basidiomycota						79.1	Private	TCTATCAGGTGTACAAAGCCACTCAGGTGGATCAGTTGACCTGGCTATCTTTAGCCTTCACCTAGCAGGAATCAGCTCAATGCTCGGTGCGATGAACTTTATTACAACAATCCTTAACATGCGAAACCCAGGAATGACTCTTCACAAGCTTCCTCTATTCTGCTGAGCGATTATGGTAACAGCAGTTCTTCTACTTCTATCACTT	12	9	3	17	5	29	6	6	6	10	8	6	6	1	0	6	0	0	6	0	22	17	2	11	5	17	8	14	7	3	10	1	7	5	0	2	9	2	0	0
OTU_839	Ochrophyta	Raphidophyceae					77.78	Published	ATTAAGCGGTATTGATGCACATTCAGGACCTGCTGTAGATTTCGCAATTTTTAGTTTACATTTATCAGGTGCATCATCAATTGCAGGAGCTATCAATTTTATAGTAACTATTGTAAATATGAGAGCCCGCGGTTTAAAATTTAATATTTTACCATTATTTGGTTGATCAGTTCTTGTGACCGCATTTTTATTATTGTTATCATTA	5	2	7	8	5	3	5	0	3	4	6	1	0	2	1	4	1	1	0	3	84	65	14	6	23	11	14	5	2	8	10	7	10	5	5	8	3	11	0	0
OTU_840	Arthropoda	Insecta	Coleoptera	Elmidae	Limnius	Limnius volckmari	100	Published	ACTGTCAGCTAATATTGCCCACAGAGGATCTTCTGTAGATCTGGCAATTTTTAGTCTCCATTTAGCCGGAATTTCCTCGATTCTTGGAGCAGTTAATTTCATTACAACTGTTATTAATATACGATCTCCAGGAATAACTTTTGACCGAATACCTTTATTTGTTTGATCAGTTGCTATTACTGCCCTCCTACTTCTCCTATCCCTC	0	0	1	0	0	0	0	0	0	0	19	0	0	0	0	0	0	0	0	0	0	0	114	0	0	0	0	0	0	8	0	0	0	0	0	225	0	0	0	0
OTU_841	Ochrophyta	Chrysophyceae	Chromulinales	Dinobryaceae	Dinobryon	Dinobryon divergens	99.51	Published	TTTAAGTGGAATTCAAGCTCATTCAGGACCTTCCATTGATTTAGCTATTTTTAGTCTTCATTTATCTGGAGCGGCATCCATTTTAGGTTCTATAAATTTTATTACTACAATTTTTAACATGAGAGCTCCTGGCATGACGTTGCATAGACTACCTTTATATGTGTGGTCTGTTTTAATAACATCTTTTTTACTGTTATTATCTTTA	8	3	13	8	5	4	3	4	1	10	4	1	0	2	5	5	3	4	3	3	7	5	15	8	2	3	3	5	4	3	10	6	4	4	1	4	10	5	0	0
OTU_842	Heterokontophyta	Oomycota					82.35	Published	ATTATCTAGTTTACAAGGACACCCAAGTCCTTCAGTAGATTTAGCTATTTTTAGTTTACATTTAGCAGGTGCTTCTTCTATTATGGGTGCAATTAATTTTATTGTAACTATATTTAATATGAGAGCACGCGGTATGTATTTTCATCGATTACCTTTATTTGTATGAGCTGTGCTTGTAACTGCATTTTTATTATTATTATCATTA	0	0	0	0	11	1	4	3	0	7	0	1	1	7	3	2	2	5	1	1	4	168	2	7	3	3	6	9	4	4	1	1	4	5	0	2	2	3	0	0
OTU_843	Heterokontophyta	Oomycota	Saprolegniales	Saprolegniaceae	Dictyuchus		95.59	Published	TTTAGCTAGTGTTCAAGCTCACTCAGGCCCTTCTGTAGATTTAGCTATTTTTAGTTTACATTTAGCGGGTATTTCATCTTTATTAGGATCAATAAATTTTATTACTACTATTTATAATATGAGATCTCCAGGTTTAACTTTTCATAAATTACCATTATTTGTTTGGTCTGTATTTATTACCGCTTTTTTATTATTATTGAGTTTA	7	6	7	1	1	5	6	3	2	5	5	0	2	1	0	3	4	4	2	0	73	37	11	4	7	7	15	14	1	1	6	3	4	4	3	1	2	3	0	0
OTU_844	Cnidaria	Hydrozoa					75.49	Published	TTTAAGCGGTATTGATGCACATTCAGGCCCTGCTGTAGATTTGGCAATTTTTAGTTTACATTTATCAGGAGCATCGTCAATTGCAGGAGCTATCAATTTTATAGTAACTATTGTTAATATGAGAGCTCACGGTTTGAAATTTAATATCTTACCATTGTTCGGTTGATCAGTTCTTGTCACAGCGTTTTTATTACTTTTATCGTTA	17	4	3	1	8	4	6	2	0	11	6	0	8	5	3	6	4	4	3	0	86	41	2	17	16	6	13	6	6	4	6	0	9	15	1	4	1	5	0	0
OTU_845	Heterokontophyta	Oomycota	Saprolegniales	Saprolegniaceae			91.18	Private	ATTATCTAGTATTCAAGCACATTCTGGACCTTCTGTAGATTTAGCTATTTTTAGTTTACATTTAGCAGGTATTTCATCATTATTAGGTGCTATAAATTTTATAACAACTATATATAATATGAGATCACCGGGATTATCTTTTCATAAATTACCTTTATTTGTTTGGTCTGTTTTCATAACAGCTTTTTTATTATTATTAAGTTTA	1	9	3	3	2	1	0	5	2	6	6	0	7	4	4	4	2	6	0	4	65	99	22	12	14	13	17	6	6	10	15	11	3	10	0	3	13	15	0	0
OTU_846	Ascomycota						81.09	Published	TTTAGCAAGTGTACAAGCACATTCAGGACCTTCCGTAGATTTAGCAATTTTTAGCTTACACCTTTCAGGGGCAAGTTCAATTATGGGATCTATTAATTTTATTGTTACAATTTTTAATATGAGAGCTCCAGGAATGTATATGTATAAATTACCTCTTTTTGTATGAGCTATGTTAGTAACATCATTTTTATTATTATTATCACTT	1	0	0	2	0	7	1	1	3	0	2	0	0	1	0	2	3	1	0	0	17	7	5	3	5	0	2	2	2	3	4	2	0	0	1	1	1	1	0	0
OTU_847	Ascomycota	Leotiomycetes	Leotiomycetes_order_Incertae_sedis	Leotiomycetes_family_incertae_sedis			90.69	Published	ATTATCAGGTATACAAAGTCATAGTGGACCAAGTGTAGATTTAGCTATATTTGCATTACACTTGTCAGGAATTAGTTCTTTACTAGGAGCTATGAACTTTATAACAACAATATTAAATATGAGAAGTCCAGGTATAAGATTACATAAATTAGCTTTATTTGGATGAGCTGTAGTAGTTACAGCTGTATTGTTATTACTATCATTA	4	0	2	6	1	2	0	0	0	6	0	0	0	1	0	0	0	0	0	1	114	149	5	7	0	38	7	5	2	5	2	1	2	15	3	0	6	7	0	0
OTU_848	Bacillariophyta	Mediophyceae	Thalassiosirales	Skeletonemataceae	Skeletonema		95.1	Published	TTTATCAAGTGCAACAGCTCACTCTGGTGGTTCTGTGGATTTAGCTATATTTAGTTTACATTTATCAGGTGCGTCATCTATTTTAGGTGCCATTAACTTTATTTGTACAATCTTTAATATGCGAGTAAAAAGTTTATCTTTTCATAATCTTCCTCTATTCGTATGATCTGTTTTAATAACAGCGTTTTTACTGTTATTATCTTTG	108	102	83	142	89	116	60	113	35	111	73	83	56	71	57	97	86	112	74	75	17	26	115	104	129	162	123	114	116	142	75	98	101	98	109	99	63	104	0	0
OTU_849	Arthropoda	Insecta	Odonata				86.76	Private	TTTAAGTAGTATTTTATCTCATTCTGGTCCTTCAGTTGATTTAGCTATTTTTAGTTTACATTTATCAGGAGCAGCCTCTATTTTAGGTTCTATTAATTTTATAACAACTGTTTTTAATATGCGTTCACCAGGATTAGCGATGCATAGAATACCTTTATTTGTTTGGGCTCTTTTAATTACTTCTTTTTTATTATTACTTTCTTTA	4	3	5	4	4	9	2	3	4	5	2	1	1	4	4	1	2	5	2	3	9	9	5	10	18	7	7	4	9	3	1	3	4	8	0	1	0	0	0	0
OTU_850	Heterokontophyta	Oomycota	Saprolegniales	Saprolegniaceae			90.2	Published	TTTATCTAGTGTACAAGCTCACTCAGGTCCTTCAGTTGATTTAGCTATTTTCAGTTTACATTTAGCAGGAATTTCTTCTTTATTGGGAGCTATAAATTTTATTACTACAATTTGTAACATGAGAGCTCCAGGTTTAACTTTTCACAAATTACCTTTATTTGTATGGTCTGTTTTTATTACTGCAATTTTATTATTATTAACTTTA	3	7	10	4	7	8	8	8	13	7	6	4	17	5	10	8	5	8	14	1	84	38	6	7	12	2	5	6	13	5	4	6	11	15	4	4	10	1	0	0
OTU_851	Ochrophyta	Raphidophyceae					76.92	Published	ATTAAGTTCAGTTGAAGGACATTCAGGACCTTCTGTCGATTTGGCAATATTTAGTTTGCATTTATCTGGTGCTTCGTCAATCGCTGGAGCAATTAATTTTATTGTAACTATTGTAAATATGCGTGGTCGTAATTTAACTTTTTATCGTTTACCCTTATTTGTATGATCAATATTAATTACAGCAATATTATTGTTATTATCTTTA	5	0	11	26	5	15	18	7	0	14	8	2	7	5	5	2	3	2	11	4	63	25	4	8	25	18	28	24	4	5	8	5	5	16	1	12	5	5	0	0
OTU_852	Arthropoda	Insecta					81.44	Early-Release	CCTCTCAGATTCTAAATTCCACACGGGCATTTCGGTTGATTTAGCCATTTTCAGGTTACACTTAGCAGGTGTTTCCTCCATCCTAGGGAGAATTAATTTTCTAACAACCATTCTGGTTTCTCGCATATCCTCCTCCCTAAGGCTGGCTCGTTTGCCACTATTTCTGTGATCCGTCGCAATCACAGCGGTTTTATTAATTGTTAGCCTC	0	0	37	19	0	0	0	0	0	0	0	0	0	0	0	0	0	0	0	0	0	0	0	0	0	0	50	34	0	0	0	0	0	0	0	0	0	0	0	0
OTU_853	Porifera	Demospongiae					77.11	Published	TCTATCAAGCGTAGCGGCCCACTCTGGGGGATCAGTTGATTTAGCTATTTTTAGTTTACATTTAGCAGGGGTAAGTAGTATTTTAGGTTCTATTAATTTTATTACTACAGTATTTAATATGCGTGCACCAGGAATGAGTATGCACCGTTTACCATTATTTGTATGGTCAATTTTTATTACTGCTTGGTTATTATTACTTTCATTA	4	8	8	5	7	12	13	20	4	15	9	2	10	4	8	8	4	5	3	4	4	5	12	3	12	11	11	4	22	10	4	9	6	11	11	7	11	12	0	0
OTU_854	Ochrophyta	Phaeophyceae					73.89	Private	ACTTAGTAGCATTCAGTTCCACTCAGGGCCTTCTGTGGATCTCGCTATTTTTAGCCTCCACATCGCCGGAGCTTCTTCTATTAGGGGTGCAATTAACTTTATTGTAACAATCTTTAATAGGCGCGCACCTGGTCTTTTTAGGCACAAGATTCCTCTATTCGTATGAGCTGCTTTTATTACAGCCTTCCTCCTTCTCCTCTCTCTT	20	8	7	7	2	5	9	6	4	10	4	3	3	7	4	1	0	1	1	4	21	41	7	8	7	13	15	6	6	3	4	3	2	6	1	5	3	15	0	0
OTU_855	Arthropoda	Insecta					79.8	Private	TCTTTCTTCAGTTGAAGCACACAGTGGCCCATCTGTTGATAGAGCTATCTTCTCACTACATTTAGCAGGTGCGTCATCTATTTTAGGTGCTATTAATTTTATTACTACTATTTTAAATATACGTGCACCTGGTATGACTATACATCGTTTACCTCTATTTGTTTGATCTGTTAGAATTACTGCTGTGTTGTTGTTATTGTCATTG	9	1	11	5	10	9	29	4	4	12	7	6	11	7	7	13	4	11	3	6	53	69	17	2	6	7	7	26	9	8	7	0	11	6	5	6	6	14	0	0
OTU_856	Cryptophyta	Cryptophyceae					82.09	Published	CCTTAGTAGTATTTCTTTTCATTCTGGCGCTGCTGTTGACCTAGGTATTTTTAGCCTTCACATAGCCGGTGCTTCAAGTATCCTTGGTGCTATTAACTTTATAACAACCATCTTTAATATGCGGATCCCTGGAATGACTATGCATAGAATACCTCTTTTTGTTTGGGCTGTATTAATAACAGCTTTTTTATTGCTTCTCTCATTG	11	19	7	2	10	7	3	5	4	11	7	1	3	2	2	14	2	4	3	4	26	111	24	18	25	14	8	18	8	4	4	10	0	3	10	6	15	9	0	0
OTU_857	Cnidaria	Hydrozoa					79.57	Published	ACTTTCAAGCGTACAAGCGCATTCAGGGCCATCTGTTGATTTTGCAATTTTTAGTTTACATTTATCAGGAGCAAGTTCTATTATGGGATCTATAAATTTTATTGTTACAATTATAAATATGAGAGCTCCAGGTATTTTTATGCATAAAATGCCATTATTTGCTTGAGCTATGTTTATTACATCATTTTTATTATTATTATCATTA	8	4	6	1	2	4	4	3	0	5	10	5	0	1	0	1	1	1	0	2	23	39	6	2	1	9	3	2	4	7	0	3	8	3	1	3	0	1	0	0
OTU_858	Ochrophyta	Phaeophyceae					76.12	Published	GTTATCTGGTATTTTAGCCCACTCAGGACCATCCGTAGATTTAGCTATTTTTAGTTTACATCTTTCAGGAGCTAGTTCTATTATGGGTTCAATTAACTTTATCGTTACAATTTTTAATATGCGCGCACCAGGACTTTTTATGCATAAAATTCCGCTTTTTGTTTGAGCTGTATTAATAACATCTTTTCTTTTATTATTATCACTC	4	1	2	4	0	9	1	1	1	5	1	7	4	1	0	3	1	0	1	0	3	40	5	3	0	3	6	9	1	0	3	4	4	4	4	4	1	2	0	0
OTU_859	Bacillariophyta	Mediophyceae	Stephanodiscales				88.06	Published	GCTATCGAGCGCAACCGCACATTCTGGAGGTTCTGTAGATTTAGCTATTTTTAGCCTGCATTTATCAGGTGCGTCTTCTATTTTAGGGGCTATTAATTTTATTTGTACAATTTTTAATATGCGAGTAAAAAGTCTATCTTTTCATAATTTACCATTATTTGTGTGGTCTGTTTTAATTACTGCTTTTTTATTGTTGTTATCATTG	34	40	38	60	27	39	35	47	24	45	33	36	46	48	32	57	45	60	32	46	1	1	48	47	49	66	38	38	43	59	36	44	43	32	49	48	25	59	0	0
OTU_860	Rotifera	Monogononta	Ploima	Brachionidae	Keratella		95.83	Published	TCTCTCCGACTCTAAGTATCATTCTGGTATTTCAGTTGACTTAGCTATTTTCAGTCTTCATTTAGCAGGAATTTCTTCTCTTGGTAGGATTAATTTCCTTACTACTATCGTTTGCTCTCGCACAACTAAGGTTATTTCTCTTGATCGTATGCCTCTAATGCTTTGGGCTATCTCTGTTACTGCTATTCTTTTGATTACTAGGTTG	96	94	146	202	267	319	205	98	202	204	123	174	293	388	59	66	277	315	173	118	0	0	42	21	16	22	65	39	253	252	3535	3832	536	550	131	131	1901	2531	0	0
OTU_861	Ochrophyta	Phaeophyceae	Laminariales				85.42	Published	TTTGGCTTCAAGCCAAGCACACTCAGGTCCTTCTGTTGATTTAGCAATATTTAGTTTACATTTAGCAGGGGCTGCTTCAATTTTAGGTTCAATTAATTTTATTACTACAATTTTTAATATGAGAGCACCTGGTATGACTATGCATAGACTACCTTTATTTGTATGGTCAGTTTTAGTTACATCTTTTTTATTGGTAATCTCTCTT	13	13	20	13	2	2	2	4	3	8	0	2	0	4	0	2	8	6	1	4	0	16	11	10	13	15	8	11	4	2	5	4	10	2	7	7	11	7	0	0
OTU_862	Arthropoda	Insecta					77.06	Private	TTTGAGTTCCGTTTTAGCGCATTCTGGATGTGCTGTAGATTTAGCTATTTTTAGTCTTCACATAGCTGGAGTTTCTTCAATTGCAGGTGCAATCAATTTTATAGTTACTATAGTGAATATGCGTTGTCCTGGTTTGTATTTCCGTAGATTACCTTTATTCGTTTGGTCAGTTTTTGTAACTGCTATTTTATTATTATTATCATTA	6	3	5	5	7	10	4	1	2	15	3	0	1	1	1	0	4	0	0	0	5	48	7	5	0	4	1	12	2	1	5	3	4	0	4	2	6	4	0	0
OTU_863	Bacillariophyta	Mediophyceae	Stephanodiscales	Stephanodiscaceae			93.14	Published	GTTGTCCAGTGCAACAGCTCATTCAGGTGGCTCTGTTGATTTAGCTATATTTAGTTTACATTTATCAGGCGCATCGTCTATTTTAGGTGCTATAAATTTTATTTGTACAATTTTTAATATGCGGGTGAAAAGTTTATCTTTTCATAACCTTCCACTATTTGTATGGTCTGTTTTAATTACAGCGTTTTTACTATTGTTGTCTTTA	156	168	132	146	140	158	158	152	116	228	171	83	98	118	134	155	130	110	103	114	97	753	102	189	242	161	185	208	121	137	84	105	160	168	96	145	146	164	0	0
OTU_864	Bacillariophyta	Mediophyceae	Thalassiosirales	Skeletonemataceae			90.26	Published	GTTGTCCAGTGCAACAGCTCACTCTGGCGGTTCTGTAGATTTGGCTATTTTTAGTTTACATTTATCTGGCGCTTCTTCTATTTTAGGTGCTATCAACTTTATTTGTACTATTTTCAATATGCGAGTAAAAAGTTTATCTTTTCATAATCTTCCTTTATTTGTATGGTCAGTTTTAATTACAGCATTTTTATTATTAACTACTTTG	487	430	357	456	390	484	383	410	268	450	401	309	311	397	305	384	400	381	432	309	394	380	448	416	559	524	518	431	524	530	332	407	421	336	297	335	288	397	0	0
OTU_865	Heterokontophyta	Oomycota	Pythiales	Pythiaceae			91.18	Published	ATTATCAAGTGTACAAGCACATTCAGGACCTTCTGTAGATTTAGCAATTTTTAGTTTACACTTATCAGGTATTTCCTCTTTATTAGGTGCAATTAATTTTCTTGCAACAATATATAATATGAGAGCACCTGGATTATATTTTCATAGATTACCTTTATTTGTTTGGTCTATTTTTATTACAGCTTTCTTATTAGTATTAACTTTA	8	1	6	6	4	6	1	12	4	13	2	1	5	1	2	7	6	8	2	9	51	85	11	14	10	14	9	14	9	12	6	1	3	4	3	2	7	13	0	0
OTU_866	Arthropoda	Insecta	Hymenoptera				86.76	Published	ACTATCAAATCAAATATATCACGGAGGAAACTCAATTGATTTAGCTATTTTTTCGCTTCATCTAGCTGGAGCTTCTTCAATTCTAGGAGCCATTAATTTTATTACTACTATTATAAACATACGACCAATAGGTATATCTTTTGAACGTATCCCACTTTTTGTATGATCTGTTTTTATCACAGCAATTTTACTACTTCTATCCTTA	0	0	0	0	0	0	0	0	0	0	0	0	0	0	0	0	0	0	0	0	0	0	107	72	0	0	0	0	0	0	0	0	0	0	0	0	0	0	0	0
OTU_867	Arthropoda	Insecta	Lepidoptera				85.39	Private	ATTATCTGGAGTTATAGCACATTCAGGAGGGTCTGTTGATTTAGCAATTTTTAGTTTACATTTAGCAGGTGTTTCTTCATTATTAGGTGCTATTAATTTTATAACAACAGTATTTAATATGCGTGCTAGTAATATGAGTTTATATGAAATACCATTATTTGTTTGAGCTATTTTAATTACTGCCTTTTTATTATTATTATCATTA	11	8	8	2	8	12	0	8	3	10	10	6	4	6	2	3	1	7	5	1	43	39	13	5	10	1	20	9	8	1	3	0	9	21	2	2	5	7	0	0
OTU_868	Arthropoda	Arachnida	Trombidiformes	Triophtydeidae	Triophytydeus		96.04	Published	TTTATCAAATCAACTATTCCATAGAGGCCAATCGGTAGACTTAACTATCTTTTCTCTTCACTTAGCTGGTATTTCATCTATTTTAGGAGCTATTAACTTTATCACAACTATTATTAATATACGATCAGCATCTTCTTCTTTTGAACGGATCCCTCTCTTTGTGTGAAGAGTTTTAATCACAGCTATTTTACTTCTACTATCCCTA	0	0	0	0	0	0	0	0	0	0	0	0	0	0	0	0	0	0	0	0	0	0	0	0	0	0	0	0	0	0	0	0	0	0	52	66	0	0	0	0
OTU_869	Heterokontophyta	Oomycota	Peronosporales	Peronosporaceae	Plasmopara	Plasmopara muralis	100	Private	ATTATCGAGTGTACAAGCTCATTCCGGACCTTCAGTTGATTTAGCGATTTTTAGTTTACATTTAACTGGTATTTCATCACTATTAGGTGCAATTAATTTTATTTCAACAATATATAATATGCGTGCTCCGGGTTTAAGTTTTCATAGATTACCGTTATTTGTTTGGTCAATTTTAATTACTGCATTTCTTTTACTACTAACATTA	2	3	6	0	0	0	0	0	0	0	0	0	0	0	0	0	3	3	0	0	129	124	0	7	0	0	34	35	1	3	7	17	0	0	3	6	2	0	0	0
OTU_870	Heterokontophyta	Oomycota					80.81	Published	ATTAAGTGGTATTGAAGCACATTCTGGACCTTCTGTAGATTTAGCAATTTTTAGTTTACATCTATCAGGTGCATCATCTATTGCTGGAGCTATAAATTTCATAGTTACAATTATTAACATGAGAGCTAAAAATTTAACTTTTTATAGATTACCTTTATTTGTGTGATCTGTATTTATTACAGCATTTTTACTATTATTATCGTTA	3	12	10	5	4	2	1	7	7	12	5	1	9	4	3	4	3	2	0	4	69	69	7	17	15	16	11	21	9	6	6	4	9	1	4	5	3	8	0	0
OTU_871	Ochrophyta	Raphidophyceae					74.75	Published	GCTAAGTGGGATTGAAGCGCACTCAGGACCTGCCGTAGATTTCGGTATTTTCAGTCTTCATCTTGCGGGTGCCTCATCTATTATGGGTGCAATTAATTTCATTGTAACTATCGTAAATATGCGCGCTCTAGGAATGACTTACTACTCTATGCCGTTGTTTGTTTGATCTGTACTTATTACCGCGTTCTTGCTACTGTTGTCTTTA	21	17	6	3	9	7	3	2	8	5	3	5	1	1	0	1	0	0	0	2	58	7	10	2	18	15	8	9	2	1	3	3	3	10	2	4	14	23	0	0
OTU_872	Ochrophyta	Phaeophyceae					78.79	Published	ACTAAGTAGTGTTGCGAGTCATTCAGGAGGATCTGTAGATTTAGCTATATTTAGTCTTCATCTTTCTGGTGTAAGTAGCCTTTTAGGCGCTATCAATTTTATTACAACAGTCTTTAATATGCGTGGTCCTGGAATGACAATGCATAGACTTCCTTTATTTGTTTGGTCTGTATTAATTACAGCGTTTTTATTGTTACTATCCTTA	6	4	10	2	17	15	22	6	5	16	6	4	8	11	7	20	7	3	10	7	0	11	15	13	17	9	9	13	15	20	8	9	13	12	13	18	12	5	0	0
OTU_873	Arthropoda	Arachnida	Trombidiformes				87.94	Published	CCTATCTAGCCAAATATTTCATAGAGGACAATCAGTAGACCTGACTATTTTTTCTCTGCACTTAGCAGGGATTTCTTCCATCTTAGGGGCCATTAACTTTATTACTACGATTTTTAATATGCGATCTAACTCTTTCTCTTTTGAACGAATTCCTCTTTTTGTATGAAGAGTTCTGATCACAGCAGTATTATTACTTTTATCCCTT	0	0	51	47	0	0	0	0	0	0	0	0	0	0	0	0	0	0	0	0	0	0	0	0	0	0	0	0	0	0	0	0	0	0	0	0	0	0	0	0
OTU_874	Arthropoda	Arachnida					77.49	Early-Release	TTTAGCAGATTTAGGACACGAAGGGGCAGCTGTTGATTTAGCTATTTTTAGTTTACATGTGGCAGGTGCAGCGTCTATAGCGGGTTCAATTAATTTTATTACAACTGTTATTAATATGCGCTCTCCTGgtttagtttttagtaagttacctttatttatatgagctgtttttattacatctattttattattATTATCTTTA	15	20	0	0	1	8	10	0	11	4	0	15	0	0	1	3	1	2	0	0	14	87	0	0	0	2	41	17	0	1	0	0	31	1	0	2	1	6	0	0
OTU_875	Arthropoda	Malacostraca	Amphipoda	Gammaridae	Gammarus	Gammarus fossarum	99.49	Published	CTTAGCCGGCAACTCCGCACATAGCGGAAGCGCTGTAGATTTAGCTATTTTCTCTTTACACCTAGCGGGGGCTTCTTCCATTTTAGGTGCCATCAACTTTATTTCCACCGTCCTAAATATACGCAGACCCGGCATATCCATAGACCAGGCGCCTCTCTTTGTCTGGTCTATTTTTATTACCACTATCCTACTTCTATTACCTCTG	0	0	5	0	0	12	0	90	32	0	291	64	0	16	0	0	0	0	92	0	2365	0	0	0	0	0	0	85	4	45	0	80	41	0	25	0	0	0	0	0
OTU_876	Arthropoda	Arachnida					76.96	Published	GTTAGCTTCAATAGAAGCTCATTCTGGTGGAGCTGTAGATTTAGCTATTTTTAGTTTGCATATAGCTGGTGCGTCATCTATGTTAGGTGCGATTAATTTTATAGCAACAGTATTAAATATGAGAGCGGAAGATGTTAAAGCTGAATTAATTCCTTTATTTGTATGGGCTGTTTTAATAACAGCTATTTTATTATTACTATCATTA	2	1	1	1	1	7	6	6	6	9	10	9	6	3	7	3	7	2	1	4	100	11	4	6	6	5	16	9	3	10	7	3	11	11	7	0	3	6	0	0
OTU_877	Ascomycota	Leotiomycetes	Helotiales	Helotiales_incertae_sedis			93.14	Published	ATTAAGTGGAGTACAAAGTCATAGTGGACCTAGTGTTGATTTAGCTATATTTGGATTACATTTATCGGGTATAAGTAGTTTATTGGGAGCTGTAAATTTCATTACTACTATACTAAATATGAGAAGTCCAGGTATCAGGTTGCATAAATTAGCTTTATTCGGTTGAGCTGTGGTTGTAACCGCAGTGTTGTTATTATTATCATTA	11	6	7	5	1	2	19	9	17	6	9	5	0	5	4	11	4	10	5	0	0	105	13	10	8	3	22	9	18	12	0	1	0	4	11	23	1	4	0	0
OTU_878	Rotifera	Monogononta	Ploima	Brachionidae			94.27	Published	TCTCTCCGACTCTAAGTATCATTCTGGTATTTCAGTTGACTTAGCTATTTTCAGTCTTCATTTAGCAGGAATTTCTTCCATTCTTGGTAGGATTAATTTTCTTACTACTATCGTTTGCTCTCACACAAAGGTTATTTCTCTTGATCGTATGCCTCTAATGCTTTGGGCTATCTCTGTTACTGCTATTCTTTTGATTACTAGGTTG	189	190	185	297	513	616	326	171	364	426	243	327	609	692	101	144	540	549	288	282	0	0	69	50	33	22	113	64	12	18	313	383	449	548	207	206	617	773	0	0
OTU_879	Magnoliophyta	Magnoliopsida					79.29	Published	TTTGAGTAGTATAGCTAGCCATTCTGGGGGGTCTGTTGATTTAGCTATATTTAGTCTTCACCTTTCAGGTGTTAGTAGTCTTTTAGGTGCTATTAATTTTATAACAACTATATTCAATATGCGTGGTCCAGGGATGACAATGCATAGACTTCCTTTATTTGTATGGGCTGTTCTAATCACTGCATTTCTATTATTGTTATCTTTA	9	6	14	13	9	5	9	6	6	12	2	1	10	6	4	15	3	7	1	4	6	4	13	6	12	9	7	7	10	17	4	3	4	8	8	9	8	6	0	0
OTU_880	Ochrophyta	Phaeophyceae					78.46	Private	ACTTTCTGCATTACAAGCGCATTCAGGGCCTTCTGTAGATTTAGCTATTTTTAGTTTTCACCTTTCAGGTACTAGCTCTATTTTAGGTTCAATTAATTTTATAGTTACAATTTTTAATATGAGAGCACCAGGAATGTTTATGCACAAAATGCCTCTCTTTGTTTGATCAGTATTAGTAACTGTATTTTTATTATTATTATCTCTC	5	2	2	5	1	1	7	4	2	3	8	1	0	0	1	1	3	1	2	4	36	144	8	3	12	4	0	0	4	7	3	0	5	3	1	2	1	2	0	0
OTU_881	Arthropoda	Insecta	Diptera	Chironomidae	Tanytarsus	Tanytarsus brundini	98.01	Private	TTTATCTTCAAGAATTGCCCACAGAGGTGCTTCTGTAGATTTAGCTATTTTTTCTCTTCATTTAGCTGGTATTTCTTCTATTTTAGGATCAGTAAATTTTATTACAACTGCCATTAATATGCGAGCTAATGGAATTACATTAGATCGAATACCTCTATTTGTATGATCAGTAGTAATTACAACCGTGTTATTACTTTTATCACTG	0	0	0	1	0	0	4	1	2	1	2	0	0	0	0	0	37	68	0	0	1	0	0	5	8	0	7	0	1	1	0	0	0	0	1	0	1	1	0	0
OTU_882	Arthropoda	Insecta	Lepidoptera				85.39	Private	ATTATCAGGTATTGAAAGCCATTCAGGAGGATCAGTAGATCTTGCTATTTTTAGTTTACATTTAGCTGGTGCATCATCAATTTTAGGTGCTATCAATTTTATTACTACAGTAATAAATATGCGTGCGCCTGCAATGAAAATGCATAGAATTCCATTATTCGTTTGAGCTGTATTTATAACAGCGTTTTTATTATTATTATCTTTA	5	4	8	2	6	2	7	8	6	7	6	3	6	9	7	8	10	3	10	5	83	42	12	11	17	14	16	2	5	3	5	1	13	15	7	10	11	16	0	0
OTU_883	Ascomycota	Eurotiomycetes	Onygenales				85.57	Published	ATTATCAAGTATACAAAGTCATAGTGGGCCAAGTGTAGATTTAGGTATATTTGCATTACATTTATCTGGAGTAAGTTCTATGTTAGGTGCAATGAATTTCATAACTACTATATTAAATATGCGTAGTCCTGGTATAAGATTACATAAAGTTACACTTTTTGGTTGAGCTACAGTTGTTACAGCTGTATTGTTATTATTATCATTA	1	4	0	2	0	2	0	1	0	0	3	0	0	0	0	0	0	0	0	0	52	0	1	8	0	0	0	0	2	0	0	0	0	0	0	1	1	1	0	0
OTU_884	Arthropoda	Insecta	Coleoptera				88.24	Private	TTTATCTAGTATTACTGCGCATTCAGGTGGTTCTGTAGATTTAGCTATTTTTAGTTTACATTTATCAGGTGTTTCATCTATTGCTGGTGCAATTAATTTTATGACTACAATAATAAATATGCGTGTAAAAGGTATGACTTTGTACCGTTTACCTTTATTTATTTGAGCTTTATTTTTAACTGCATTTTTATTAGTTTTAACTTTA	24	15	0	2	3	7	8	9	11	4	9	11	1	1	8	9	25	6	7	13	0	0	14	9	3	19	1	3	11	11	6	4	20	15	10	8	12	7	0	0
OTU_885	Ascomycota	Dothideomycetes	Pleosporales				89.22	Published	TTTATCAGGAATACAAAGTCATAGTGGTCCTAGTGTGGACTTAGCTATCTTTGGATTACACCTTTCTGGTATTTCAAGTTTACTTGGAGCTATGAATTTCATGACAACTACATTTAATATGAGAAGTCCTGGTATAAGATTACATAAATTAATCCTATTTGCTTGAGCAGTTGTTATTACAGCTGTTTTATTATTATTATCATTA	3	1	2	3	8	0	3	2	2	4	1	2	1	8	1	0	1	7	0	0	15	38	8	13	9	16	2	5	1	4	7	3	7	2	1	2	51	41	0	0
OTU_886	Heterokontophyta						82.27	Private	TTTATCTGGCAACACTGCACATTCAGGTGGAGCTGTAGATTTAGCAATTTTTAGTTTACATTTGTCGGGAGCAGCATCAATTTTAGGGGCAATTAATTTCATTTGCACCATATTTAATATGCGAGTAAAAAGTTTATCATTCCATAAGTTACCTTTATTTGTTTGGTCAATTTTGATTACAGCATTTTTATTGTTATTGTCATTA	18	10	6	8	14	6	11	10	1	9	5	3	8	3	8	3	2	9	3	5	0	26	11	5	11	4	3	7	6	10	6	2	11	6	11	6	5	2	0	0
OTU_887	Heterokontophyta	Oomycota					75.98	Published	ATTAAGCGGAATTGATGCACATTCCGGTCCGGCTGTTGATCTTGCAATTTTTAGTTTACATTTATCAGGAGCTTCTTCGATTGCAGGTGCGATTAATTTCATCGTGACCATTATGAATATGAGAGCGCGTGGTTTAGAGTTTTATCGATTACCATTATTTGTGTGATCTGTTTTTATTACTGCCATTTTATTATTATTATCTTTA	5	0	1	0	12	8	7	1	4	11	6	3	0	1	0	5	4	3	1	0	0	179	0	5	11	10	24	1	6	0	5	1	2	2	5	5	2	4	0	0
OTU_888	Porifera	Demospongiae					75.62	Published	TTTAGCAAGCGTTCAAGCTCACTCAGGCCCCTCGGTTGATCTAGCTATCTTTAGTTTACACTTAGCGGGTATTTCATCTATAGCCGGTGCTATAAATTTTATTAGTACAATATTTAACATGCGCGCGCGGGGGTTAACGATGTACCGTCTGCCATTATTTGTGTGATCTGTTTTAATCACGGCATTCCTACTTTTATTGTCGTTG	27	4	6	4	9	2	17	4	8	6	8	1	0	9	10	6	16	9	12	2	100	0	0	0	0	0	43	6	3	0	1	2	6	4	6	15	2	16	0	0
OTU_889	Heterokontophyta	Oomycota					81.37	Published	ATTATCTAGTCTACAAGGGCATCCAAGTCCTTCAGTAGATCTAGCTATTTTTAGTTTACATTTAGCAGGCGCATCTTCAATTATGGGCGCAATTAATTTTATTGTAACTATATTCAATATGAGAGCACGAGGTATGTATTTTCATAGATTACCTTTATTTGTTTGAGCAGTACTTGTAACTGCTTTTTTATTATTATTATCTTTA	2	1	5	2	3	1	16	5	1	11	12	0	2	4	1	2	0	3	2	2	61	10	7	7	11	18	13	11	5	2	6	0	8	9	3	0	2	8	0	0
OTU_890	Bacillariophyta	Bacillariophyceae					80.88	Published	ACTTTCTGGTATAACAGCTCATTCAGGAGGTGCTGTTGATTTAGCTATTTTTAGTCTTCATTTATCCGGGGCATCTTCTATTTTAGGAGCAATTAATTTTATTTGTACAATAGTTAATATGAGAACAGATAGTTTACCATTTCATAAGCTACCTTTATTTGTTTGGTCTGTTTTAATAACTGCGGTACTGCTTTTGTTATCTTTA	9	18	9	10	7	2	15	8	3	4	4	0	4	1	2	5	9	1	5	1	18	16	7	6	3	1	8	8	2	4	3	4	18	6	4	12	23	17	0	0
OTU_891	Cryptophyta	Cryptophyceae	Cryptomonadales				85.78	Published	TTTAAGTAGTATTTCTGGTCATCCAGGTGGTGCAGTTGATTTAGGTATTTTTAGCTTACATGTAGCTGGAGCTTCGAGTATTTTAGGGGCAATCAACTTTATAACTACTATTTTAAATATGAGAGGTCCGGGTATGACTATGCATAGAATACCTTTATTTGTTTGGGCAGTTTTTATAACAGCATTTTTATTACTTTTATCTCTA	11	9	6	7	3	3	3	13	9	7	5	5	2	2	5	9	3	3	1	1	60	54	15	6	13	13	16	5	9	5	3	8	14	14	12	3	5	7	0	0
OTU_892	Arthropoda	Arachnida	Trombidiformes	Eriophyidae	Abacarus	Abacarus hystrix	100	Published	TTTATCTCATATTTCTTTCCATACGGATATTTCTGTCGACTTAGCAATCTTCTCTCTTCATCTGGGAGGGGTTTCCTCTATTCTTAGTAGCATCAATTTCATTACCACTATTTTTAGAATGCGATTTTCGGGGTTTAATATAGAGCGTTTACCCTTATTTGTTTGGTCCATAATGGTGACCTCGTTCCTTTTATTATTTTCCCTC	0	1	0	0	4	10	2	4	0	0	1	0	4	3	2	1	0	0	0	0	44	24	0	2	0	0	4	6	1	2	0	0	0	0	3	4	120	95	0	0
OTU_893	Cnidaria	Staurozoa					72.92	Published	CCTAAGCGGCATCGAAGCGCACTCCGGTGCAGCTGTAGATTTTGGAATTTTCAGTCTTCACCTCGCTGGGGCGTCCTCCATTCTTGGAGCTATCAATTTTATTGTAACAATTGTAAATATGCGTGCACTTGGAATGACCCTGTACACTCTACCCCTCTTCGTGTGATCTGTCCTCATTACCGCTTTCCTTTTACTTCTTTCCCTT	0	0	0	21	6	0	0	0	0	8	0	0	0	0	0	6	9	0	0	0	48	15	2	0	0	0	0	0	2	3	0	0	0	0	0	0	4	5	0	0
OTU_894	Porifera						76.04	Private	ACTGAGTAGCATTGCTAGTCACTCTGGAGGAGCTGTAGATTTAGCTATTTTCAGTCTTCACTTATCTGGAGCAAGTAGTATTTTAGGGGCAATCAACTTCATTACGACCATTATGAACATGAGAGCTCCAGGGATGTCAATGCACCGTCTACCTTTATTCGTGTGGTCAGTGTTCATTACAGCATTCTTATTACTACTATCACTT	5	0	2	7	2	10	12	4	2	16	7	1	6	2	6	21	0	3	1	3	5	20	2	6	8	17	1	19	15	14	3	3	7	5	1	5	1	9	0	0
OTU_895	Arthropoda	Arachnida	Trombidiformes	Eriophyidae	Aculodes	Aculodes mckenziei	100	Published	TCTTTCTAGGATTTCCTTTCACACAGACTTCTCCGTTGACTTAGCAATTTTCTCTCTACATTTAGGTGGAGTATCCTCTATTCTTAGTAGAATTAACTTTATTACCACAATTTTTAGAATACGTTTCTCTGGATTTAATTTAGAGCGGATACCCCTTTTTGTGTGGTCTATGTTAGTTACCTCTTTTCTTTTACTCTTCTCTTTG	0	0	0	0	0	0	0	0	0	0	0	0	0	0	0	0	0	0	0	0	0	0	0	0	0	0	0	0	86	54	0	0	0	0	0	0	0	0	0	0
OTU_896	Cnidaria	Hydrozoa					77.66	Private	ATTAAGCGGACCTATTGCACATGCTGGTCCTTCCGTTGATTTTGCTATTTTTAGCTTACATATTGCTGGTGCATCTTCTATTATGGGAGCTATTAACTTTATTACAACTATCGTTAATATGAGACACCCTGGATGCGAATTCCACAATATGAACTTATTTGTTTGGTCGGTCTTTATTACGGCCATCCTACTGTTATTATCTTTA	1	0	2	2	3	6	0	7	4	27	5	2	11	0	4	9	0	6	3	1	172	0	20	4	2	6	5	9	2	1	1	3	4	3	8	1	4	5	0	0
OTU_897	Arthropoda	Insecta					72.89	Private	ACTTGCCTCTATCCAAGCACATTCTGGTGGAGCCGTAGATTTAGCTATCTTCAGTTTACATGTCGCAGGAGCTTCCTCTATCTTAGGAGCCGTAAACTTCATCACTACAGTAATCAATATGCGAGAAGAGCGTTATACTTGACATCGACTTCCTCTATTCGTTTGAGCAGTTTATGTTACAGCTTGATTACTTCTTTTATCCCTT	9	14	10	8	35	5	0	1	3	32	11	2	0	12	0	5	3	3	8	0	18	35	1	0	12	12	2	14	6	1	1	0	16	4	4	13	3	7	0	0
OTU_898	Amoebozoa	Discosea					77.94	Published	GTTATCGAGCGTGGCAGCTCACTCTGGGGGATCGGTTGATTTAGCTATTTTTAGTTTACATTTAGCAGGGGTAAGTAGTATTTTAGGTTCTATTAATTTTATTACTACAGTATTTAATATGCGTGCACCAGGGATGAGTATGCATCGTTTACCATTATTTGTATGGTCAATTTTTATTACTGCTTGGTTATTATTACTTTCATTA	5	12	13	13	8	5	6	3	8	9	3	1	4	10	4	10	3	2	9	7	0	15	6	9	11	17	9	7	14	11	3	6	7	3	8	2	8	17	0	0
OTU_899	Arthropoda	Insecta	Lepidoptera				86.36	Published	ATTAAGTAGTATAGTTGCTCATTCTGGCCCATCAGTAGATTTAGCAATTTTTAGTTTACATATTGCTGGAATATCATCTTTATTAGGTGCTATAAATTTTATTACAACTATATATAATATGAGAATAAATGGGTTAACCTTTCATAAATTACCTTTATTTGTTTGATCTGTTTTTATAACAGCATTTTTATTATTATTATCTTTA	1	4	4	5	7	4	3	4	7	12	0	6	0	0	4	4	4	8	4	0	11	76	5	6	6	7	10	3	5	3	0	6	3	2	1	6	4	2	0	0
OTU_900	Ochrophyta	Raphidophyceae					78.79	Published	ACTATCAAGTGTAGAAGCACATAGTGGACCATCTGTAGATAGAGCAATTTTCTCATTGCATCTAGCAGGGGCGTCATCGATTTTGGGAGCGATTAATTTCATTACGACCATTGCAAATATGCGAGCACCAGGACTAACGATGCATCGATTGCCATTGTTCTGTTGGTCTGTATTGATTACTGCGGTGTTGTTGCTAAGATCATTG	12	2	10	3	2	0	2	2	7	12	4	0	5	7	9	10	9	8	2	2	19	0	5	2	11	0	3	12	9	11	3	3	17	10	3	1	5	3	0	0
OTU_901	Bacillariophyta	Mediophyceae	Stephanodiscales	Stephanodiscaceae			91.04	Published	ATTATCAAGTGCAACGGCTCATTCCGGCGGCTCTGTGGATCTAGCTATATTTAGTCTGCATTTATCAGGTGCATCGTCTATTTTAGGTGCTATTAATTTTATTTGTACAATTTTTAATATGCGGGTAAAAAGCTTGTCTTTTCATAACCTTCCGTTATTTGTATGGTCTGTTTTAATTACAGCATTTTTACTACTGCTGTCTTTA	12	10	23	12	15	4	20	8	6	14	14	4	15	5	12	14	11	10	7	8	2	70	13	5	15	11	15	9	20	19	9	22	14	11	11	20	17	15	0	0
OTU_902	Rotifera	Monogononta	Ploima	Synchaetidae	Synchaeta		97.4	Published	ATTATCTGATTCTAAATTTCATTCTGGTATTTCTGTTGATTTAGCTATTTTCAGTTTACATTTAGCTGGTATTTCTTCTATTTTAGGTAGTATTAATTTTATAACTACTATTTGTTCTCGTACAACAAAGATAATTAGTATAGATCGTTTACCACTAATGTTATGATCATTGGGTGTTACTGCCTTTTTATTACTAACTACTTTG	28	19	35	44	88	84	57	53	28	59	33	17	79	72	10	7	73	79	67	68	194	299	2	8	0	0	13	10	17	28	50	68	105	86	56	58	52	48	0	0
OTU_903	Rotifera	Monogononta	Ploima	Brachionidae	Keratella		97.34	Published	TCTCTCCGACTCTAAATATCATTCTGGTATTTCAGTTGACTTAGCTATTTTCAGTCTTCATTTAGCAGGAATTTCTTCCATTCTTGGTAGGATTTTCTTACTACTATCATTTGCTCTCGCACAACTAAGGTTATCTCTCTTGATCGTATGCCTCTAATGCTTTGAGCTATTTCTGTTACTGCTGTTCTTTTAATTACTAGGTTG	703	448	5605	6208	12937	15049	6	1853	2518	12	2015	2207	6566	7414	5361	6552	8988	7725	3707	3316	0	53	0	1	0	0	2718	2711	1167	1066	5940	6238	6403	7088	8670	9161	7164	8283	0	0
OTU_904	Chlorophyta	Chlorophyceae	Chlorococcales	Oocystaceae			90.2	Published	CTTAGCAGGTATTGCGAGTCACTCTGGTGGTTCAGTAGATCTTGCAATTTTCAGTTTACATCTTGCAGGTGCTAGTAGTATCATGGGTTCTATCAATTTTATTACTACTGTATTTAATATGAGAGCTCCAGGTATGAGTATGCACAGATTACCTTTATTTGTATGGGGTGTATTCATTACAGCTTTTTTATTAATTTTATCACTT	1	1	0	1	1	0	0	0	0	0	0	0	0	0	0	0	3	0	5	1	12	0	0	2	6	3	1	1	0	0	0	0	0	0	0	0	2	0	0	0
OTU_905	Rotifera	Monogononta	Ploima	Synchaetidae			94.15	Published	TCTATCTGACTCTAAGTTCCATTCTGGAATTTCTGTAGACCTTGCCATTTTTAGTCTACATCTTGCTGGAATTTCTTCTATTCTTGGTAGAATCAATTTTCTTTCTACAATTATTTGTTCTCGAACAACCAAGCTTGTTTCTCTAGACCGTCTTCCTCTGATGCTTTGAGCTATGGCTGTTACAGCAGTTCTGCTGGTTACTAGACTA	0	0	5	7	0	0	0	0	0	0	0	0	0	0	0	0	0	0	0	0	0	0	0	0	0	0	29	43	16	13	0	0	79	121	0	0	0	0	0	0
OTU_906	Ochrophyta	Phaeophyceae					80.6	Published	ATTAAGTTCTATTCAAGCTCACTCAGGTCCTTCAGTGGATTTAGCTATTTTTAGCTTGCATTTAAGTGGTGCTTCATCAATTTTAGGCGCAATTAATTTTATCACCACAATTTTAAATATACGTGCACCTGGTATAGGTATACACCGTTTACCATTGTTTGTATGGTCTATTTTTATTACTGCCTTCTTGCTTTTATTATCTTTA	1	7	3	2	6	3	14	1	0	4	1	3	3	1	3	4	4	1	4	0	144	48	13	13	13	6	12	10	3	13	4	5	7	7	2	7	7	5	0	0
OTU_907	Ascomycota	Leotiomycetes	Leotiomycetes_order_Incertae_sedis	Leotiomycetes_family_incertae_sedis			93.14	Published	TTTAAGTGGAGTACAAAGTCACAGTGGACCAAGTGTGGATTTAGCTATATTTGCTTTACATTTATCAGGTATAAGTAGTTTATTAGGTGCAATAAACTTTATAACTACTATACTTAATATGAGAAGTCCAGGTATAAGACTACACAAATTAGCTTTATTCGGTTGAGCTGTAGTTGTTACAGCTGTTTTACTATTACTATCATTA	8	4	9	8	13	14	11	4	3	2	13	0	0	2	1	1	1	0	0	1	16	2	41	15	10	4	30	13	8	4	0	13	9	9	2	10	11	6	0	0
OTU_908	Cnidaria	Hydrozoa					79.9	Private	ATTATCAGGAATTTTAGCACACTCAGGGCCTTCAGTAGATTTAGCTATTTTTAGTTTACATTTATCAGGAGCAAGTTCAATTATGGGATCTATTAACTTTATTGTTACAATCTTTAATATGAGAGCACCTGGACTTTTTATGCATAAATTACCTTTATTTGTATGAGCAGTATTAGTAACAACATTCTTATTATTATTATCATTA	10	1	0	4	8	3	4	1	5	10	0	0	0	1	3	1	4	6	1	0	50	68	6	4	5	7	6	9	4	5	1	1	3	10	0	1	3	0	0	0
OTU_909	Zygomycota						78.43	Private	TCTATCATCTATCGAATATCATTCTGGTGGATCAGTAGATTTAGCTATTTTTAGTTTACACTTAGCCGGAATTAGTTCTGTCTTGGGCGCAATGAACTTCATTACTACTATCTTAAATATGAGAGCTCCTGGTATGACAATGCATAACATACCATTATTCGTATGAGCCGTATTCATTACTGCAATACTATTATTATTATCATTA	1	4	0	0	4	0	2	5	2	0	0	1	0	0	0	1	0	0	1	0	13	1	0	8	0	0	10	3	2	1	0	1	2	0	4	0	0	1	0	0
OTU_910	Ascomycota	Leotiomycetes	Leotiomycetes_order_Incertae_sedis				85.78	Published	ATTATCTGGAATTCAAAGTCACAGTGGACCTAGTGTAGATTTAGCCATTTTTGCTCTGCACCTATCAGGTATAAGTAGTCTATTAGGAGCTATGAATTTTATAACAACTATACTAAATATGAGAAGCCCAGGAATAAGATTACACAAATTAGCCTTATTCGGATGAGCAGTTGTGGTAACAGCAGTTTTATTACTTTTATCATTA	1	2	16	7	3	1	1	14	2	1	5	5	0	2	0	0	0	3	2	5	3	66	20	9	10	6	25	13	7	9	2	2	13	23	9	17	7	0	0	0
OTU_911	Cnidaria	Hydrozoa					78.92	Published	ATTATCAGGTATTTTAGCACATTCAGGACCTTCAGTAGATTTAGCTATTTTTAGTTTACATTTATCAGGGGCAAGTTCAATTATGGGATCTATTAACTTTATCGTTACAATTTTCAATATGAGAGCACCTGGACTTTTTATGCATAAATTACCATTATTCGTATGAGCTGTATTAATTACTACATTCTTATTATTATTATCATTA	0	0	1	1	0	2	3	2	3	5	10	1	2	0	0	4	0	1	4	0	34	16	4	7	3	7	0	4	3	1	1	4	1	0	1	4	2	1	0	0
OTU_912	Cnidaria	Hydrozoa					78.43	Published	ATTATCATCAATACAAGCACATTCAGGTGGGGCAGTTGATTTCGCAATCTTCAGCCTACATTTAGCAGGTGTTTCATCATTACTAGGAGCAATTAACTTTATTACAACAGTGATAAATATGAGAGCACCTGGAGTGGGATTTGCTCAATTACCATTATTTGTTTGGTCTGTATTCTTTACAGCTTTCTTATTATTATTATCATTA	0	0	0	0	0	0	0	0	0	0	0	0	0	0	0	0	0	0	0	0	0	0	0	0	0	0	0	0	0	0	0	0	0	0	0	0	0	0	0	0
OTU_913	Arthropoda	Arachnida					75.25	Early-Release	TTTAAGTTCTTTATTATCACACTCTGGCTATTCTGTAGATTTTGCTATTTTTAGTTTACATTTAGCTGGTGTTTCTTCTATAGCTGGTGCTATTAATTTTTTAGTTACTATTTATAATATGCGTTGCTTAGGTTTATATTTAACAATTATGCCTTTATTCGTTTGAACTATTTTAGTTACTGCTTTATTACTATTATTGTCTTTA	23	14	12	14	2	11	8	4	2	11	17	4	1	4	26	19	3	7	9	0	48	15	0	0	0	4	7	5	0	2	3	2	14	7	14	14	11	18	0	0
OTU_914	Basidiomycota						99.49	Private	TCTATCAGGACTACAAAGTCACTCAGGAGGTTCAGTAGATCTAGCTATTTTTAGTCTACACCTGTCAGGTATTTCATCAATGCTGGGAGCAATGAACTTTATTACTACAGTTCTTAATATGCGAAACCCAGGAATGACACTACATAAACTACCACTATTTGTTTGGGCTATCTTTGTTACAGCTATTCTACTGCTACTATCACTA	0	1	1	0	0	0	0	3	0	0	0	0	0	0	0	0	0	0	1	1	1	8	8	4	5	0	88	42	2	9	3	1	0	0	0	0	0	3	0	0
OTU_915	Ochrophyta	Phaeophyceae					75.98	Private	ATTAAGTGGGATTGACGCGCATTCCGGTCCGGCAGTGGATCTTGCAATCTTTAGTTTACATTTATCAGGAGCTTCTTCTATCGCAGGTGCGATTAATTTCATTGTCACCATTATGAATATGAGAGCACGTGGTTTGGAGTTTTATAGATTACCATTATTTGTGTGATCAGTTTTTATTACTGCGATTTTATTGTTATTATCTTTA	8	2	5	7	6	3	12	4	0	9	7	1	2	2	3	5	1	7	0	2	66	49	25	7	10	7	10	10	20	8	5	5	4	2	11	21	6	11	0	0
OTU_916	Rotifera	Monogononta					80.21	Early-Release	TCTCTCTGATTCCAAGTATCATAGAGGAATTTCAGTTGATTTGGCTATTTTTAGACTCCACATTGCTGGTATTTCATCTATTTTAGGTAGTATTAATTTCTTAACTACTATTATTTGTTCACGTACAACAAAAATGATTTCCTTAGACCGCATGCCTCTTATGATTTGAGCCCTAGGTATTACAGCTATTTTATTGATTACAAGACTG	22	14	0	0	0	0	0	0	0	0	0	0	0	0	7	18	0	0	0	0	0	0	0	0	0	0	0	0	14	4	0	0	0	0	0	0	14	6	0	0
OTU_917	Rotifera	Monogononta	Ploima	Synchaetidae	Polyarthra		97.35	Published	TCTGGCAGATGCTAAATATCATTCAGGTATTTCTGTTGATTTGGCGATTTTTAGTCTTCATTTAGCTGGAGTTTCTTCTATTTTAGGAAGAATTAATTTTTTAACTACTATTATTTGTTCTCGTACTACAAAATTGATTTCTATGGATCGTTTACCTTTGTTATTATGAGCAGTTACAGCTGTATTGTTAATTACAAGATTA	148	134	165	152	606	577	197	293	141	246	264	108	454	512	524	601	139	101	371	365	62	53	27	23	44	39	460	378	457	538	208	274	116	97	266	299	738	908	0	0
OTU_918	Rotifera	Monogononta					79.79	Published	TTTGTCCGATTCAAAGTACCATAGTGGGATTTCTGTGGATTTAGCTATTTTTAGATTACATTTAGCTGGTATTTCCTCTATTTTAGGAAGAATTAATTTTTTAACTACAATTATTGTTTCTCGAATGTCCTCAGATATAACTTTGGATCGTTTACCTTTGTTTTTATGGGCGATTGCTATTACAGCAGTCCTTTTAATTGTAAGGTTA	0	0	0	0	0	0	0	0	0	0	0	0	0	0	0	0	0	0	0	0	0	0	0	0	0	0	0	0	0	0	0	0	47	27	0	0	0	0	0	0
OTU_919	Bacillariophyta	Mediophyceae	Thalassiosirales	Skeletonemataceae	Skeletonema		96.08	Published	TTTATCAAGTGCAACAGCTCACTCTGGAGGTTCTGTAGATTTAGCAATATTTAGTTTACATTTATCAGGTGCGTCTTCTATTTTAGGTGCTATTAACTTCATTTGTACTATTTTTAATATGCGAGTAAAAAGTCTATCTTTTCATAATTTACCATTATTTGTATGATCTGTTTTAATTACTGCGTTTTTACTGTTATTATCTTTG	208	206	138	224	164	180	130	172	98	177	150	124	93	133	112	199	165	160	157	165	53	66	165	185	277	224	217	213	204	282	150	173	160	214	122	135	129	206	0	0
OTU_920	Arthropoda	Insecta	Lepidoptera				86.52	Published	TTTATCGAGTATTGAAAGTCATTCTGGGGGTTCAGTTGATCTTGTTATTTTTAGTTTACATTTGGCAGGAGTTTCATCTTTATTAGGAGCCATTAATTTTATTACTACTATTTGTAATATGAGATTACCTAATATGACATGGAATCGTATTCCATTATTTGTTTGGGCTGTTTTTATTACAGCTATTTTGTTATTATTATCATTA	7	8	1	6	10	3	11	1	0	2	7	0	0	0	1	1	0	0	1	2	84	43	0	6	6	6	20	16	5	0	0	1	13	3	8	2	4	4	0	0
OTU_921	Bacillariophyta	Mediophyceae	Thalassiosirales	Skeletonemataceae			90.69	Published	TTTATCAAGTGCAACAGCTCACTCTGGCGGTTCTGTAGATTTGGCTATTTTTAGTTTACATTTATCTGGCGCTTCTTCTATTTTAGGTGCTATCAACTTTATTTGTACTATTTTCAATATGCGAGTAAAAAGTTTATCTTTCCATAATCTTCCTTTATTTGTATGATCTGTTTTAATTACAGCATTTTTATTATTATTATCATTA	179	152	172	200	147	207	121	172	122	151	118	155	128	156	146	166	160	198	200	113	46	73	153	149	211	201	223	177	153	178	155	170	161	157	111	140	109	175	0	0
OTU_922	Arthropoda	Insecta	Diptera	Chironomidae	Paratanytarsus	Paratanytarsus dissimilis	100	Private	ATTATCTTCAAGAATTGCTCATAGAGGAGCTTCGGTTGATTTAGCAATTTTTTCTCTTCATTTAGCAGGAATTTCATCTATTCTTGGATCAGTAAATTTTATCACAACTGCTATTAATATACGATCTAATGGTATTACTTTAGATCGAATACCTCTATTTGTTTGATCAGTTATTATTACTACTATTTTACTTCTTCTCTCTCTC	4	2	2	4	0	2	0	0	0	6	1	0	0	0	1	3	0	0	0	0	1	16	6	5	28	44	22	7	2	6	2	1	11	0	0	4	12	4	0	0
OTU_923	Cnidaria	Hydrozoa					80	Published	TTTAAGTGGAAATATAGCACATTCTGGAGGTGCTGTAGATTTAAGTATTTTTAGTTTACATATTGCAGGTATTTCATCTATAGCAGGAGCTTTAAATTTTATTACAACTATTTTTAATATGAAATCTACAGGTTTAAATTTTAATAGATTAGGTTTATATCCTTGATCTGTTTTAATTACAGCTTTTTTATTATTATTATCTTTA	4	0	0	3	3	0	0	0	0	1	0	0	0	0	0	0	1	6	1	0	4	8	2	1	3	0	1	1	0	5	0	3	2	0	0	0	0	0	0	0
OTU_924	Heterokontophyta						82.84	Private	ATTATCTAGTGTACAAGCTCATTCAGGACCTTCTGTTGATCTAGCAATATTTAGTTTACATTTAGCAGGAGCTTCTTCTATTTTAGGAGCTATTAATTTTATAGTAACTATTTTAAATATGAGATGTCCTGGAATGTTTATGCATAAATTACCTTTATTTGGTTGAGCTGTTTTTATTACAGCAATTTTATTACTATTATCTTTA	3	3	2	4	1	4	5	4	2	1	1	0	1	0	1	13	4	1	1	1	24	12	7	2	27	7	8	3	6	2	5	2	3	4	1	2	4	1	0	0
OTU_925	Ochrophyta	Phaeophyceae					81.48	Published	GTTATCAAGTATAGCCAGTCACTCAGGAGGTTCAGTTGATTTAGCTATTTTTAGTCTTCACTTATCGGGGGTTAGTAGCTTATTAGGTGCTATTAATTTTATAACTACTGTTTTTAACATGCGTGGTCCGGGTATGACAATGCATAGACTTCCTTTATTTGTTTGGTCTGTGTTAATAACGGCATTTTTATTATTATTATCTTTA	18	5	5	9	8	8	8	10	9	8	6	1	6	3	11	15	1	17	8	5	11	16	3	9	16	15	11	7	6	6	5	9	15	11	6	9	12	17	0	0
OTU_926	Bacillariophyta	Mediophyceae	Thalassiosirales	Skeletonemataceae	Skeletonema		96.08	Published	TTTATCAAGTGCAACAGCTCACTCTGGAGGTTCTGTAGATTTAGCAATATTTAGTTTACATTTATCAGGCGCATCGTCTATTTTAGGTGCTATAAATTTTATTTGTACAATTTTTAATATGCGAGTGAAAAGTTTATCTTTTCATAATCTTCCTCTATTCGTATGATCTGTTTTAATAACAGCGTTTTTACTGTTATTATCTTTG	11	37	16	31	18	15	11	22	8	24	9	17	6	18	8	18	19	21	10	14	2	3	19	16	28	41	24	18	19	27	7	18	14	21	13	14	5	24	0	0
OTU_927	Rotifera	Monogononta	Ploima	Synchaetidae	Polyarthra		97.98	Published	TCTTTCTGACTCTAAGTACCATTCAGGTATTTCAGTAGATTTAGCTATTTTTAGTCTTCATCTTGCTGGAGTTTCATCTATTCTGGGTAGAATTAATTTTCTTTCAACAATTATTTGTTCTCGAACAACTAAGATAATCTTGACCGTTTACCTTTATTCTTGTGATCTGTATCTATCACTGCTATTCTATTAATTACAAGATTA	0	1	289	309	63	60	11	1553	44	1	1834	59	218	288	173	197	0	5	634	508	0	0	0	0	0	0	136	144	0	1	2	4	366	383	0	0	0	1	0	0
OTU_928	Chordata	Actinopterygii					50	Published	TTAGTCTGACACACCTTATCATATGGGTGCAGCAGTAGATCTCTCAATTTAGAGTCTACATTTAGCTGGATTTTCTTCCTTAATGGGAGCAATTAATATTATTACAACAATTATTAATATGCGTGCTTCAGGAATTACTATGGAAAAATAACCATTATTTGTATGAAGTGTATTTATCACCGCCTGGTAGTTATTGCTATCATTA	4	5	1	8	7	4	13	14	3	15	5	2	1	8	5	2	6	9	14	6	56	8	3	8	9	7	11	14	8	6	5	7	7	8	7	5	19	12	0	0
OTU_929	Ochrophyta	Phaeophyceae					80.1	Private	ATTAAGTAGTATTACAGCTCATTCAGGTGGTGCTGTGGATTTAGCAATATTTAGTCTTCATTTATCAGGAGCAAGTAGTATATTAGGTGCTATTAATTTTATTACTACAATATTTAATATGAGAGCACCAAATATGTCTATGCATCGTTTACCTTTATTTGTATGGGCAGTTCTTATTACAGCATTTCTTTTATTATTATCTTTA	5	6	1	4	11	10	16	4	5	1	7	1	0	5	5	7	8	3	1	2	56	25	3	6	9	3	5	5	0	6	5	4	7	4	1	0	3	0	0	0
OTU_930	Heterokontophyta	Oomycota					80.88	Published	TTTATCAGGTATTTTAGCGCATTCAGGACCTTCTGTAGATTTAGCTATTTTTAGTTTACATTTATCAGGGGCAAGTTCAATCATGGGGTCTATTAATTTTATAGTTACTATTTTTAATATGAGAGCACCTGGGTTATTTATGCATAAATTACCTTTATTTGTATGAGCTGTTTTAGTAACAACATTTTTATTATTATTATCTTTA	5	2	0	1	3	0	5	2	2	8	0	2	4	5	1	2	1	5	2	6	57	83	5	3	5	6	5	7	3	7	3	2	5	3	0	5	2	6	0	0
OTU_931	Arthropoda	Insecta	Lepidoptera				85.39	Private	ATTATCTGGCATTGAAGCACATTCTGGTGGTTCTGTAGATTTAGCTATTTTTAGTTTACACTTAGCAGGTGCATCTTCAATTTTAGGAGCAATGAATTTTATTACAACTGTAATTAACATGAGATCTCCAGCCCTAAAGATGCATAGAATTCCTTTATTTGTTTGAGCACTTTTTATAACTGCATTTTTATTATTATTATCATTA	13	7	10	8	11	2	1	2	12	2	12	4	3	2	5	5	4	7	0	1	44	50	3	13	9	24	12	11	16	0	6	2	10	10	2	4	8	2	0	0
OTU_932	Heterokontophyta	Oomycota					75.51	Published	GTTATCGAGTATACAAGCACACTCTGGAGCAAGTGTATATTTAGCTATATTTAGTTTACACTTAGCAGGTATTTCATCTATATTAGGTGGGATAAACTTTATATGTACAATACTAAATATGAGAGGAGAAAAAGTATCTATGCATTTAATTCTATTGTTTGTTTGGGCCGTTTTAATTATAGCCGTTTTATTATTGTTATCTTTG	0	0	6	2	4	4	4	14	6	7	3	0	3	2	9	4	4	11	2	1	77	64	12	1	5	12	21	15	5	4	3	1	0	0	3	0	4	0	0	0
OTU_933	Ochrophyta	Phaeophyceae					74.51	Published	ACTTTCAGGACTTCAAGCACATTCAGGGCCTTCAGTTGATCTCGCTATTTTCAGTTTCCACTTATCAGGGACAAGTTCAATTTTAGGATCAATTAATTTCATCGTTACAATTTTCAACATGAGAGCTCCAGGGCTTTTCATGCATAAATTACCACTTTTTGTTTGAGCTGTATTAGTAACAACTTTCTTACTCTTACTCTCATTA	3	1	2	8	5	9	0	2	0	7	0	0	0	0	5	3	4	5	2	1	43	73	8	12	12	7	6	5	4	3	0	5	3	7	0	5	4	6	0	0
OTU_934	Ochrophyta	Phaeophyceae					81.09	Published	GCTATCTGGTATTCAAGCGCACTCTGGTGCTTCAGTTGATTTAGCAATTTTTAGTTTACACATCTCTGGTGCTTCGTCAATTGCAGGTTCAATTAATTTTATTACAACTATTTTGAATATGCGTGCTCGTGGTATGTATATGTATAAATTACCATTATTTTGTTGAGCTGTTTTGGTAACGGCATTTTTGCTTTTATTATCTTTA	5	4	1	5	3	4	1	4	1	9	1	4	0	10	2	2	5	8	0	7	70	48	26	6	5	5	3	8	11	2	2	4	10	3	6	9	11	4	0	0
OTU_935	Bacillariophyta	Bacillariophyceae					84.31	Published	TCTTTCTGGTATTGTAGCTCACTCAGGAGGTTCTGTGGATTTAGCAATTTTTAGCCTTCATTTGTCAGGAGCAGCTTCTATTTTAGGTGCAATTAATTTTATTTGTACAATTGTAAATATGCGAACTGATAGTCTTCCATTTCACAAATTACCATTATTTGTGTGGGCGATTTTTATTACTGCTATTCTTTTATTATTATCATTA	8	4	6	4	4	8	2	2	3	6	2	4	5	6	7	7	14	6	10	10	5	1	10	8	15	11	5	9	6	0	8	1	10	11	2	3	10	4	0	0
OTU_936	Arthropoda	Copepoda	Calanoida	Diaptomidae	Skistodiaptomus	Skistodiaptomus pallidus	100	Published	GTTATCCAGTAATATCGCCCATGCTGGCAGTTCCGTGGATTTTGCTATTTTTTCATTACATTTAGCCGGAGTGAGCTCAATTCTTGGAGCTGTAAACTTTATTAGAACTCTAGGAAATTTGCGAGTGTTTGGAATAATTTTAGACCGAATACCACTCTTTGCTTGAGCTGTTTTAATCACCGCGGTTTTACTACTTTTATCTTTA	0	0	0	0	0	0	0	0	0	0	0	0	0	0	0	0	0	0	0	0	0	0	85	88	0	0	0	0	0	0	0	0	0	0	0	0	0	0	0	0
OTU_937	Bacillariophyta	Mediophyceae	Thalassiosirales	Skeletonemataceae			93.63	Published	TTTATCAAGTGCAACAGCTCACTCTGGAGGTTCTGTAGATTTAGCAATTTTTAGTTTACACTTATCTGGTGCATCTTCTATTTTAGGAGCTATCAATTTTATTTGTACAATTTTTAATATGCGAGTAAAAAGTTTATCTTTCCATAATCTTCCTTTATTTGTATGATCTGTTTTAATAACAGCGTTTTTACTGTTATTATCTTTG	19	12	16	17	20	26	13	24	6	18	10	10	14	10	15	16	17	17	5	9	5	6	18	29	13	22	19	17	18	25	10	13	12	19	10	15	8	15	0	0
OTU_938	Cnidaria	Hydrozoa					78.28	Private	TTTATCTGATACACCATATCATACAGGAGGTACAGTAGATTTAGCTATATTTAGTTTACATTTAGCTGGTTTCTCTTCTTTAATGGGTGCTATTAATTTAATAACAACAATTGTAAATATGAGAGTAATGAAAATGGAAGAATTACCATTATTTGTATGGAGTATTTTAATAACTGCTTGGTTATTATTAATATCTTTA	4	2	2	7	0	2	3	1	1	8	2	4	1	2	1	1	1	0	3	4	34	46	16	25	16	16	24	23	10	4	0	9	0	3	5	8	2	1	0	0
OTU_939	Arthropoda	Insecta					73.26	Private	ATTGTCAAGTATAGAAGCGCATTCAGGCGCATCTGTTGATTTGGCAATTTTTAGTTTACACATTGCGGGTATATCTTCTATCCTTGGGGCTATCAACTTTATTGTTACCGTACTAAACATGCGGCCAGATAAAATGAGCATGCATTTATTACCTCTTTTTGTGTGGGCAGTTCTAATAACGGCTATTCTTCTATTATTATCTTTG	0	0	0	1	0	0	2	1	4	3	0	0	1	0	1	0	1	0	1	0	108	106	3	1	2	3	3	5	3	0	2	0	3	5	3	4	0	0	0	0
OTU_940	Arthropoda	Collembola	Symphypleona	Dicyrtomidae			93.53	Published	CCTAGCCTCTAACGTAAGCCATGCAGGAGGCTCAGTAGACCTGTCAATCTTTAGCCTACACTTAGCAGGTGTGTCCTCAATTCTAGGTGCCATCAATTTTATTACAACAATTATTAACATACGAACAACCGGAATAACTTGAGATCGAACACCTCTATTTGTGTGGTCAGTTTTTTTAACCGCTATTCTCCTACTTCTATCACTT	40	110	40	80	0	0	0	5	0	0	0	2	0	0	0	0	0	0	0	0	0	0	0	6	5	0	0	4	0	0	0	0	3	0	0	4	0	0	0	0
OTU_941	Ochrophyta	Raphidophyceae					86.32	Published	ACTAAGTAGTGTTCAAGCACATTCAGGGCCTTCAGTAGATCTAGCAATTTTTAGTTTACACTTATCAGGTGCAGCTTCAATTTTAGGATCAATTAATTTTATTACTACTATTTTTAACATGAGAGCTCCTGGTATGACAATGCATAGATTACCATTATATGTATGGTCAGTGCTAGTTACTTCATTTTTATTATTACTATCACTT	0	0	0	0	4	4	0	1	1	0	0	1	0	0	0	5	0	0	0	0	3	7	1	1	6	2	1	2	4	0	2	4	1	4	0	0	0	0	0	0
OTU_942	Arthropoda	Insecta					80.1	Published	ATTGTCTTCTATAGCTGCTCATAGTGGTGCTTCTGTTGACTTAGCGATATTTAGTTTACATTTAGCTGGTGTTTCTTCTTTATTAGGTGCTATTAATTTTATATGTACAATATTTAATATGCGAATTCAAGGAATGATATTCCATCGTTTGAGTTTATTTATTTGGGCTGTTTTAATTACAGCTGTGTTATTATTATTAAGTTTA	0	0	2	7	1	5	15	1	0	7	0	0	0	0	0	0	0	0	0	0	115	56	26	8	15	16	5	0	2	6	0	1	2	5	2	4	5	4	0	0
OTU_943	Ochrophyta	Phaeophyceae					72.04	Private	ATTATCTGATTCAGTAGCTCATGCAGGAAGTAGTGTAGACTTTGTAATTTTTAGTTTACATTAGTCAGGTATTAGTAGTTTAATGGGTGCTATTAATATTATTACAACTGTCTTAAATATGAGAGCTCCAGGTATGACTTAGGAACGTTAGCCTTAGTTTGTCTGGGCAGTTTTTATTACTGCTGTCTTACTTTTAGTTTCATTA	5	4	3	5	3	6	15	3	8	10	7	2	8	8	12	8	13	6	4	8	43	27	5	3	10	9	5	9	0	0	7	4	3	6	3	8	14	11	0	0
OTU_944	Arthropoda	Insecta					75.86	Published	TCTAAGTGGACCAGTTTCACATAGTGGTGGATCCGTAGATCTAGTAATTGTTTCACTACATATTGCTGGGGTCAGTTCATTACTGGGAGCTATTAATTTATTAGCTACAGTAAGTAACATGAGAAGTGGTGGATTAGGTTATGAAAGATTACCATTATTTGTATGAGCTATTGCTATTACAGCAGTATTATTAATGTTATCATTA	0	0	1	2	0	2	0	0	3	1	2	0	0	0	0	0	2	0	0	0	2	42	14	0	5	6	0	0	0	0	0	0	0	0	3	5	3	4	0	0
OTU_945	Ascomycota	Dothideomycetes	Pleosporales				92.65	Published	TTTATCAGGTATACAAAGTCACAGTGGTCCAAGTGTTGATTTGGCCATATTTGGTTTACATCTTTCTGGTATATCTAGTCTTCTTGGAGCCATGAACTTCATGACAACTACATTTAACATGAGAAGTCCTGGAATAAGATTACATAAATTAATATTATTTGCATGAGCGGTTGTTATTACAGCTGTTTTATTATTATTATCTTTA	2	0	11	1	0	1	1	1	4	4	2	1	1	1	3	2	3	1	1	0	39	73	3	13	22	5	0	18	2	4	2	3	7	2	4	4	11	4	0	0
OTU_946	Rotifera	Monogononta	Ploima	Synchaetidae	Polyarthra		97.45	Published	TCTTTCTGACTCTAAGTACCATTCAGGTATTTCAGTAGATTTAGCTATTTTTAGTCTTCATCTTGCTGGAGTTTCATCTATTCTGGGTAGAATTAATTTCAACAATTATTTGCTCTCGAACAACTAAGATAATCTCTCTTGACCGTTTACCTTTATTCCTGTGATCTGTATCTATCACTGCTATTCTATTAATTACAAGATTA	315	232	527	576	863	965	787	2255	1956	899	2307	1613	3374	4059	4680	6190	2446	2325	3086	2765	45	36	179	141	11	14	645	612	894	894	703	824	3698	3412	507	596	496	578	0	0
OTU_947	Arthropoda	Insecta					77.06	Published	ATTGTCTAGTGCAATTGCACATTCAGGTGGTAGTGTTGATTTAGCTATTTTTAGTTTACATTTAGCAGGAGCTTCTTCAATAGCAGGTTCTATAAATTTTATGACAACAATAATAAATATGCGTGTTGAATCTTTAACTTGATATCGTTTACCACTTTTTATATGGTCATTATTTTTAGCTTCTTTTTTATTAGTTTTAACATTA	3	3	4	2	0	0	3	1	0	1	3	0	0	1	1	1	0	0	0	0	2	0	0	1	0	0	0	5	0	0	1	2	0	2	0	0	0	0	0	0
OTU_948	Cnidaria	Hydrozoa					75.66	Private	ACTTTCAAGTATACAAGCGCATTCTGGTCCATCTGTAGATCTAGCCATATTTAGTCTACATCTATCAGGTGCTTCTTCAATAAGGGGAGCTATAAATTTTATAGTAACTATATTTAATAGGCGTGCACCTGGACTATTTAGGCATAAGCTACCTCTATTTGCATGAGCGGTACTTATAACAGCATTCCTACTACTTCTATCTCTA	1	4	1	5	4	0	8	4	5	4	2	3	2	3	6	3	3	1	8	0	17	20	12	6	7	4	13	8	6	2	0	8	4	8	0	0	2	2	0	0
OTU_949	Arthropoda	Insecta					82.57	Published	ATTATCTGGTATTATTGCACATTCAGGTGGTTCAGTTGATTTAGCTATTTTTAGTTTACATTTAGCTGGTGTTTCTTCTTTACTAGGTGCTATCAATTTTATTACTACAGTATTTAACATGCGTGTAGCTAATATGAATTTATATGAAATACCTTTATTTTGTTGAGCTATTTTAATTACTGCTTTTTTATTATTATTATCTTTA	4	0	0	0	1	4	1	1	1	9	2	0	2	0	1	3	2	2	4	1	115	76	2	1	16	0	7	3	2	4	2	2	10	3	1	2	0	0	0	0
OTU_950	Arthropoda	Insecta					79.4	Private	TTTAAGCGGTGCTTTAGCACATGCTGGGCCTTCTGTTGATTTTGCTATTTTTAGTTTACATATTGCAGGTGCTTCTTCAATCATAGGTGCCATTAATTTTATTACAACTATTATTAATATGCGTCATAATGGATTAAAATTTCGCTCTTTAAATTTATTTGTTTGAAGTGTTTTTATTACTGCTTTTTTATTATTGTTATCATTA	1	15	4	4	11	1	10	2	3	5	6	1	5	4	2	4	3	4	7	6	28	102	9	1	7	7	14	11	5	0	9	4	1	4	1	5	0	3	0	0
OTU_951	Mollusca	Bivalvia					72.58	Published	ACTTTCGCATATTTTGGCACATTCTGGTGGTGCAGTTGATTTGGGTATTTTTAGTATTCATATGGCAGGTGCAGCTTCTTTATTAGGTTCTATTAATTTTATTACTACTTTTTGGAATATGCGTGCTCCACATTTATTTTTACATCGTATTCCATTATATGCATGGGCTTCATTATTGACTGCGATTTTATTATTATTATCTGTT	0	1	4	2	14	3	8	9	6	8	6	1	1	3	1	5	11	2	4	1	51	38	1	11	5	20	10	8	2	0	11	0	11	5	6	6	1	3	0	0
OTU_952	Basidiomycota	Agaricomycetes	Agaricales				85.29	Published	TCTTTCAAGTGTACAATCACACTCAGGAGGTTCAGTTGATTTAGCCATATTTAGTTTACACTTAGCTGGAGTTTCTTCTTTATTGGGAGCTATAAATTTCATTTGTACTGCCATAAACATGAGAACTAACGGAATGTCAATGCATAAATTACCTTTATTTGTGTGATCTATTTTTGTTACAGCTGTACTATTATTAATAACTTTA	0	3	0	0	0	8	0	0	0	4	0	0	0	0	0	0	0	0	2	0	60	13	5	3	4	0	12	17	4	0	6	6	0	0	3	2	1	0	0	0
OTU_953	Ascomycota	Dothideomycetes	Pleosporales				92.04	Published	ATTATCAGGAATACAAAGTCATAGTGGTCCAAGTGTGGACTTAGCTATATTTGGATTACATCTTTCTGGTATTTCAAGTTTACTTGGAGCTATGAATTTTATGACTACTACATTTAATATGAGAAGTCCTGGAATAAGATTACATAAATTAATACTATTTGCATGAGCAGTTGTTATTACAGCTGTTTTATTATTATTATCATTA	11	1	5	4	0	2	2	2	0	4	2	0	3	0	7	0	0	0	0	2	7	17	0	4	19	17	5	5	2	3	0	1	1	0	4	0	0	6	0	0
OTU_954	Arthropoda	Arachnida					71.95	Early-Release	ATTAGCAGACACTGGACATGAAGGCCCTTCTATTGATTTTGCTATTTTTAGTTTACACGTTGCTGGAGCCGCTTCAATAGCCGGCGCTGTAAATTTTTTAACTAGTGTAGGTAATATGCGATCTCTTGGCTTTTTTTATAGCAAACTTCCATTGTTTAATTGAGCTACATTTGTAACTTCAGTTTTATTATTATTATCTTTA	10	10	7	4	12	0	9	10	1	22	11	6	0	0	0	0	0	0	15	13	0	0	0	0	22	46	3	7	0	0	0	0	16	5	9	3	11	5	0	0
OTU_955	Ochrophyta	Phaeophyceae					77.78	Published	ATTAAGTAGTATTCAAGGGCATCCAGGGGCGGCTGTTGATTTGGGTATTTTCTCACTTCATATTGCTGGTGTGTCTAGTATTTTAGGATCTATTAACTTCATAACAACAATTTTTAACATGCGAGCTCCTGGGATGACAATGCATCGTTTGCCTTTATTTGCTTGGGCAGTGTTAATTACGGCGTTTTTATTATTGTTGTCGTTA	7	0	4	0	3	0	9	3	2	6	2	2	3	0	5	2	2	2	2	1	74	41	12	8	8	10	4	5	5	6	4	0	10	8	1	1	6	2	0	0
OTU_956	Arthropoda	Insecta					78.49	Published	TCTTGCCAGTATCGAGTATCATTCTGGAGCCAGTGTTGATTTAGCTATATTTAGCTTACATTTAGCCGGAATCTCTTCTATACTTGGGGCAATGAACTTCATTACTACAATACTTAATATGCGAGCTCCTGGTATGACTATGCACAAATTACCATTATTTGCTTGATCTGTATTTTTAACAGCAATTTTATTAATTTTATCATTG	0	0	0	0	0	0	0	0	0	0	0	0	0	0	0	0	0	0	0	0	0	0	0	0	0	0	0	0	0	0	0	0	0	0	0	0	0	0	0	0
OTU_957	Ochrophyta	Phaeophyceae					73.12	Early-Release	TCTGAGTGGAATCCAAGCGCACTCTGGACCTTCGGTTGACCTTGCTATCTTCAGCCTTCACCTCTCCGGAGCTGCTTCCATTCTTGGTGCTATCAACTTCATCGTTACCATCTTTAATAGACGTGCTCCCGGTCTTTTTAGACACAAGCTACCTCTGTTCGTTTGATCAGTGCTTATTACAGCTTTTCTGCTTCTTCTTTCTCTA	5	2	5	0	5	6	6	12	1	14	7	3	6	8	3	4	2	3	2	7	44	67	1	14	14	21	4	13	6	3	0	2	6	13	5	2	6	4	0	0
OTU_958	Ochrophyta	Raphidophyceae					76.99	Published	ACTAAGTAGTATTCAAGCACATTCAGGACCTTCAGTAGATCTAGCAATTTTTAGTCTTCATCTATCTGGAGCTTCATCAATTATGGGAGCAATTAATTTTATTGTAACTATCGCTAATAGGCGAGCACCAGGACTATTTAGGCATAAAATTCCACTTTTTGTTTGAGCAGTTCTAGTTACAGCTTTTCTACTACTTCTATCTCTT	1	3	1	0	0	3	0	3	1	0	1	0	1	0	0	1	2	2	0	1	3	23	1	4	1	10	4	1	0	2	3	1	1	0	2	1	3	1	0	0
OTU_959	Arthropoda	Insecta					78.18	Private	TTTAAGTACCTCCTTGTTTCATTCTGGTGGTTCGGTTGACCTAGCTATATTTAGTTTGCATATTTCCGGTACTTCCTCTTTGTTAGGGGCAATAAATTTTATTGTTACCTCGCTTAACATGCGTACCAAAGGTATGAATTTGCAAAATATGCCTCTTTTTGTTTGGGCTATATTAGTAACTGCAGTATTGTTGCTGTTAGCTCTA	4	1	4	2	12	3	2	0	2	0	8	1	6	0	0	0	13	4	1	2	69	103	5	4	1	19	10	3	9	1	0	5	1	0	8	4	6	3	0	0
OTU_960	Arthropoda	Collembola	Entomobryomorpha	Isotomidae	Desoria		96.52	Private	CCTGTCTTCTGGAGTAGCTCACGCAGGAGCTTCAGTAGATCTTTCTATTTTTAGTCTTCACCTAGCAGGAGCTTCTTCTATTTTAGGAGCTGTAAATTTTATCACAACAATTATTAACATGCGAACTGCTGGAATAACTTGAGACCGAACTCCTCTTTTTGTATGATCTGTATTTTTAACAGCAATTTTACTTCTTTTGTCCCTA	0	0	0	0	4	0	0	0	0	0	0	0	0	0	0	0	1	0	0	0	0	0	0	0	187	132	0	0	0	0	0	0	0	0	0	0	4	10	0	0
OTU_961	Ascomycota	Sordariomycetes	Hypocreales	Bionectriaaceae			90.05	Private	ACTATCAGGACTTCAAAGTCATAGTGGACCAAGTGTAGATTTAGCTATTTTTGCTTTACATTTATCAGGTGTAAGTAGTTTATTAGGAGCTATAAATTTTATTACTACAATAGCAAACATGCGAACACCAGGTATACGATTACATAAATTAACTTTATTTGGTTGAGCTGTGGTTATAACTGCTATATTGTTATTATTATCTCTA	4	3	2	7	1	1	0	3	0	1	1	1	0	9	2	1	0	0	1	0	31	170	24	12	1	1	3	0	0	1	0	2	5	3	1	3	2	2	0	0
OTU_962	Ochrophyta	Phaeophyceae					80.51	Published	TTTAAGTAGTATACAAGGTCACCCAGGAGCTGCTGTAGATTTAGGGATATTTTCTCTTCATGTTGCAGGTGCATCAAGTATTTTAGGTTCTATTAACTTTATAACAACTATATTTAACATGCGAGCGCCAGGTATGACAATGCACCGCTTACCTTTATTTGCGTGGGCGGTTTTAATTACTGCGTTTTTATTGTTATTATCGTTA	5	5	3	3	0	1	2	0	1	5	2	0	0	0	1	0	0	1	0	1	2	21	2	2	5	1	1	2	4	5	7	3	2	7	1	5	3	4	0	0
OTU_963	No Match	No Match	No Match	No Match	No Match	No Match			TTTAAGCGGAATCGAAGCGCACTCCGGCCCCGCTGTGGACTTTGGTATTTTCAGCCTACACCTGGCCGGAATGTCCTCCATCCTCGGCGCGATTAATTTCATCGTTACGATTTTCAATATGCGTGCACCCGGCATGCCACTCTATGTTATGCCTCTTTTTGTTTGAAGCATTCTAATTACCGCGTTCCTACTGCTTCTTTCTTTA	11	8	3	11	2	0	2	1	7	16	7	0	4	1	3	3	4	1	0	0	105	76	1	3	3	3	6	9	7	3	4	2	0	1	0	7	2	4	0	0
OTU_964	Cnidaria	Hydrozoa					76.92	Published	TTTATCTAGTGCAGCAGCTCATCCAGGAGGTGCCGTAGATCTAGCAATTTTTAGTTTACATCTTGCAGGTGCTTCATCTATTGCTGGTTCTATAAATTTTATGACAACTATTTTTAATTTAAGAGTTAAAGGGTTTCATATGCATAGATTACCTTTATTTATTTGAGCTTCTTTAATTACTGCGTTTTTATTAGTATTTACATTA	1	3	12	3	3	0	5	2	0	3	2	0	1	1	0	7	11	0	0	1	27	56	11	10	11	4	9	8	6	4	2	1	2	3	10	7	5	2	0	0
OTU_965	Annelida	Polychaeta	Spionida	Spionidae			90.5	Published	GTTATCAAGTGCAACTGCACATTCTGGAGGTTCTGTAGATTTAGCTATTTTTAGTTTACATTTATCTGCATCTTCTATTTTAGGTGCTATTAATTTTATTTGTACAATTTTTAATATGCGAGTAAAAAGTCTATCTTTTCATAATTTACCATTATTTGTATGAGCTGTTTTAATTACTGCGTTTTTATTATTATTATCATTA	338	289	198	183	171	252	317	216	240	310	329	165	163	212	224	301	271	347	273	243	851	845	393	302	512	429	363	283	292	277	220	240	287	289	247	247	230	273	0	0
OTU_966	Heterokontophyta	Oomycota					78.43	Private	GTTATCAGGCATTCAAGCCCACTCAGGCGCTTCAGTAGACTTAGCTATTTTTAGTTTACACGTATCGGGGGCTTCATCAATCGCGGGTTCAATTAATTTTATTACTACTATTTTAAATATGCGATCTCGCGGTATGTACTTATACAAATTGCCGTTATTTTGTTGAGCTGTTTTAGTTACTGCTTTTTTGCTGTTATTGTCTTTA	4	3	4	17	3	9	7	8	2	6	5	5	4	4	6	4	6	1	1	7	48	10	10	11	7	5	7	2	6	5	1	3	21	5	8	4	11	2	0	0
OTU_967	Arthropoda	Insecta					72.92	Published	ATTATCAGGATCTGTTTCTCATAGTGGAGGTTCAGTAGATTTAGTTATAGTATCCTTACATCTTGCTGGTGTAAGTTCCTTATTAGGAGCTATAAACTTACTGGCTACTATAAGTAATATGAGATCTGGAGGTTTAGGCTATGAAAGATTACCATTATTTGTTTGAGCTATTGGAATTACTGCCGTATTGTTAATGTTGTCTTTG	3	4	4	7	1	4	6	0	1	12	0	3	0	1	1	0	0	0	1	12	29	97	27	16	0	1	5	14	3	3	5	5	6	5	3	8	6	1	0	0
OTU_968	Arthropoda	Insecta					81.4	Published	TTTAGCTGGTGTTATTGCGCATGCTGGTCCAGCAGTTGATTTATTGATTTTTAGTTTACATCTAGCTGGTATTTCTTCAATTTTAGGTTCTATAAATTTTATTGTTACTATTTTGTTTTATAGATTTGAAGGTTTGACAATGTTTAGAATTCCATTATTTGTTTGATCCGTTTTTATTACTGCTGTTTTATTGTTACTTTCTGTT	6	4	0	4	5	3	2	6	6	9	1	0	4	6	6	8	7	2	0	0	136	24	9	15	8	4	2	3	4	4	2	4	6	12	12	3	4	2	0	0
OTU_969	Bacillariophyta	Mediophyceae	Stephanodiscales				89.06	Published	GCTATCGAGCGCAACCGCACATTCTGGAGGTTCTGTAGATTTAGCTATTTTTAGCCTGCATTTATCAGGCGCATCTTCTATATTAGGAGCTATTAATTTCATTTGTACAATCTTCAATATGCGAGTAAAAAGTTTATCTTTTCATAATTTACCATTATTTGTGTGGTCTGTTTTAATTACTGCTTTTTTATTACTAACTACTTTG	72	61	72	45	66	72	41	30	42	66	64	36	35	43	56	60	50	64	63	26	43	50	63	57	74	52	67	84	78	112	47	82	47	59	46	51	50	67	0	0
OTU_970	Bacillariophyta	Bacillariophyceae	Bacillariales				89.71	Published	TTTATCAGGTATTATTGCACACTCTGGTGGTGCGGTAGATCTTGCAATTTTTAGTCTTCATTTATCTGGAGCAGCTTCAATTTTAGGAGCAATTAATTTTATTTGTACTATCATTAATATGCGAGCTGATAGTCTTCCTTTCCACAAGTTACCATTATTTGTTTGGTCAGTTTTTATTACTGCTATTCTTTTATTATTATCTCTT	3	1	4	2	0	3	0	3	2	2	4	1	0	0	1	0	2	1	0	0	19	16	2	2	1	1	21	0	2	1	4	3	1	6	2	0	1	0	0	0
OTU_971	Ochrophyta	Phaeophyceae					80.81	Published	TTTATCTTCAATTCAAGCTCATTCAGGAGCTTCTGTAGATTTTGCAATTTTTAGTCTTCATTTATCAGGAGCAGCATCTATTTTAGGTGCGATTAATTTTATTGTTACTATTTTTAATATGCGCGCACCTGGATTATTTATGCATAAAATTCCACTTTTTGTGTGAGCAGTATTGATTACAGCATTTTTACTTTTATTATCATTA	1	5	3	4	12	9	0	5	3	5	9	2	3	2	6	2	2	2	0	1	89	1	2	12	12	11	2	4	3	7	0	2	7	4	0	1	4	7	0	0
OTU_972	Arthropoda	Collembola					75.76	Published	CTTAAGCTCAATCCCCGCCCATTCAGGCCCGTCGGTTGATCTTGCGATTTTTAGTCTTCATATCGCGGGTGCATCATCGATTATGGGCGCAATTAATTTTATTGTTACGATTTTGCGCATGCGCTGTCGTGGTATGACAATGGATCGATTGCCATTATTTTGTTGATCTGTTCTTGTAACTGCAATTCTTTTGTTATTATCTCTC	1	0	7	0	0	0	0	0	0	0	0	0	0	0	0	0	0	0	0	0	0	97	1	0	7	7	4	10	0	0	0	2	0	0	0	0	0	3	0	0
OTU_973	Bacillariophyta	Mediophyceae	Thalassiosirales	Skeletonemataceae			90.69	Published	TTTATCAAGTGCAACAGCTCACTCTGGAGGTTCTGTAGATTTGGCTATTTTTAGTTTACATTTATCTGGCGCTTCTTCTATTTTAGGTGCTATCAACTTTATTTGTACTATTTTCAATATGCGAGTAAAAAGTTTATCTTTTCATAATTTACCATTATTTGTGTGGTCTGTTTTAATTACAGCATTTTTATTATTGTTATCGTTA	588	570	509	630	370	453	476	608	348	622	486	633	354	411	461	631	467	671	568	524	153	155	431	486	631	762	641	556	438	576	389	463	472	450	355	433	235	517	0	0
OTU_974	Arthropoda	Insecta	Hemiptera	Cicadellidae	Tremulicerus	Tremulicerus fulgidus	99.51	Private	TCTTTCTTCTAATATTGCTCATTCAGGGCCTAGCGTTGATTTAGCTATTTTTTCTTTACACTTAGCCGGTATCTCTTCAATCTTAGGTGCTGTGAATTTTATTACTACTGTAATTAATATACGCTCTTCAGGTATAACTTTTGATCAAACTCCTTTATTTGTGTGGTCAGTATTAATTACAGCTGTACTACTATTACTTTCACTA	2	0	0	0	0	3	0	1	0	4	10	1	0	0	0	0	0	0	0	0	0	0	2	5	0	0	17	23	32	10	15	12	37	10	2	0	3	0	0	0
OTU_975	Arthropoda	Insecta					78.79	Published	TTTAAGTTCTATTTTAGCACATTCTGGGTGTGGGGTTGATTTAGCCATTTTTAGTTTACATATGGCAGGGATATCTTCTATTGCAGGTGCTATCAATTTTATTGTTACTATTTCAAATATGCGTTGTCCTGGTTTATATTTTCGACGATTACCTTTATTTGTTTGATCTGTTTTTATTACGGCTTTTTTATTATTATTGTCATTG	5	9	5	11	6	9	11	8	6	12	4	4	5	7	4	10	12	2	4	5	4	46	8	4	23	12	17	9	12	4	1	12	2	14	3	5	7	2	0	0
OTU_976	Arthropoda	Malacostraca					78.16	Private	CTTGAGAAGAGGTCTAGGTCATAGGTCTTGTGCTGTTGATTTAATGATCTTCGCGCTTCATTTAGCTGGGGCAAGTTCAATTCTTGGTGGAATCAATTTTTTGTGTACTTTTGGCAATAGACGTGCTTATGGTGTAGTACTAGGTGGTGCCTCTCTATTCGTTTGGAGGGTGGTGGTTACAAGATTCTTGCTAGTTCTGTCTCTA	25	8	27	34	10	9	0	4	1	0	3	1	0	0	5	13	5	8	0	0	0	0	0	0	0	0	4	5	2	3	2	1	20	10	8	20	35	27	0	0
OTU_977	Basidiomycota	Exobasidiomycetes	Microstromatales				85.71	Published	ACTAAGTAGTCTACAAAGTCATTCAGGAGGATCAGTGGATCTAGCTATTTTCAGTATGCATCTAGCAGGTATTAGTTCAATGCTAGGAGCTATGAATCTAATTACAACAATTCTAAATATGCGAAACCCAGGTATGACACTACATAAACTACCACTATTTGTATGGGCAATTTTCATTACAGCAATTCTACTGCTACTATCACTA	4	4	16	5	3	2	1	4	0	7	3	1	0	0	2	0	1	0	3	1	23	94	2	7	8	2	7	8	8	1	4	3	2	10	9	8	15	3	0	0
OTU_978	Arthropoda	Insecta	Coleoptera	Byrrhidae	Byrrhus	Byrrhus pilula	100	Published	TCTTTCTGCTAATATCGCCCATAGTGGATCATCAGTAGATTTAGCAATTTTCAGCCTACATCTTGCTGGAATCTCATCAATTCTGGGAGCAGTAAATTTTATTTCTACGGTAATCAATATACGATCACCAGGAATAACTTTTGATCAAATACCGCTATTTTCATGATCAGTTGCAATTACAGCTCTTTTACTACTTCTTTCACTT	1	0	1	2	0	0	0	0	0	0	0	0	3	1	4	1	6	3	0	2	116	151	0	1	1	1	2	6	1	6	3	1	5	0	1	0	0	1	0	0
OTU_979	Ochrophyta	Phaeophyceae					73.58	Private	ACTTTCTAGCATCCAGGCCCACTCTGGACCTTCAGTTGACCTTGCAATCTTTAGCCTTCACCTCTCAGGTGCGGCTTCGATTCTTGGTGCAATTAATTTCATTGTTACAATCTTTAACAGACGCGCTCCAGGTCTTTTTAGACACAAGCTGCCTCTCTTTGTCTGGTCAGTTCTTATTACAGCGTTTCTTCTGCTTCTTTCTCTG	5	1	5	5	6	7	1	8	2	8	7	3	0	4	10	6	7	0	1	1	20	51	9	5	10	12	5	5	4	3	2	0	5	6	3	5	2	2	0	0
OTU_980	Ochrophyta	Phaeophyceae					78.28	Published	TTTAAGTTCAGTTCAAGCACATTCAGGTCCTTCTGTATGTCTTGCTATTTTTTCATTACACCTTGCAGGAACTTCTTCTATTCTTGGGGCTATAAATTTCATTACAACTATTTTTAATATGCGAGCTCCGGGGATGAGTATGCACAGATTGCCTTTATTAGTTTGGGCTGTTCTAATTACTGCATTCCTTCTTTTACTTTCACTA	2	4	4	1	4	7	3	4	0	5	2	0	10	3	2	4	4	4	3	0	20	12	2	5	3	9	4	10	5	3	4	5	2	2	4	0	1	0	0	0
OTU_981	Arthropoda	Malacostraca					76.72	Private	ACTATCTAGCATTGAAGCCCATAGTGGTCCATCTGTTGATAGAGCCATTTTTTCGTTGCACTTGGCGGGTGCTTCGTCAATTTTGGGTGCAATTAATTTTATTACAACAATTGTTAATATGCGTGCGCCTGGGTTAACAATACACCGATTACCATTGTTTTGTTGGTCCGTATTAATTACAGCCGTTCTATTATTGAGATCTTTG	3	0	8	3	0	1	5	4	5	0	12	1	2	5	3	8	4	2	2	4	31	60	5	0	1	11	1	5	6	11	4	2	6	8	0	6	14	7	0	0
OTU_982	Porifera	Demospongiae					80.39	Private	TTTATCAAGTATCGCAAGTCACTCTGGAGGATCAGTAGATTTAGCAATTTTTAGTTTACATTTAGCAGGGGCAAGTAGTATTTTAGGCTCAATCAATTTTATTACAACTGTGTTTAATATGCGAGCACCTGGAATGAGTATGCACCGGTTACCTTTATTTGTATGGTCAATTTTCATTACTGCTTGGTTATTATTACTTTCATTA	9	2	8	11	14	5	22	6	7	9	7	2	10	12	12	14	49	8	11	1	8	0	6	5	17	6	13	19	12	4	4	4	11	8	13	9	8	8	0	0
OTU_983	Cnidaria	Hydrozoa					81.86	Private	ATTATCAGGAATTTTAGCACATTCAGGACCTTCTGTAGATTTAGCTATTTTTAGCTTACATTTATCAGGAGCAAGTTCTATTATGGGATCTATAAATTTCATTGTAACAATTTTTAATATGAGAGCACCTGGACTTTTTATGCATAAATTACCTTTATTTGTATGAGCAGTATTAGTAACAACTTTTTTATTATTATTATCCTTA	4	0	2	0	3	6	4	1	3	6	0	0	1	1	9	3	1	2	5	1	48	39	9	4	4	5	7	11	5	5	1	3	0	1	1	1	4	0	0	0
OTU_984	Rotifera	Monogononta	Ploima	Brachionidae	Keratella		97.4	Published	TCTCTCCGACTCTAAGTATCATTCTGGCTCAGTTGACTTAGCTATTTTCAGTCTTCATTTAGCAGGAATTTCTTCCATTCTTGGTAGGATTAATTTTCTTACTACTATCGTTTGCTCTCGCACAACTAAGGTTATTTCTCTTGATCGTATGCCTCTAATGCTTTGGGCTATCTCTGTTACTGCTATTCTTTTGATTACTAGGTTG	6490	6326	6753	8090	16036	18140	10150	5894	12560	12051	7109	11540	18843	21053	3618	4381	17714	17109	10235	8753	2	0	2099	1711	1127	871	3197	2376	562	583	10108	12259	14086	16641	6677	7428	19498	24907	0	0
OTU_985	Ochrophyta	Phaeophyceae					81.11	Published	ATTGTCATCTATTGAGTATCACTCAGGCCCATCTGTTGACTTGGCTATCTTTAGCCTTCACCTTTCTGGTGCTTCATCTATCTTGGGTGCTATCAACTTTATTACGACTATCTTTAACAGGCGTGCTCCTGGCATGACGAGGCATCGACTACCTCTATTCTGTTGGGCAGTTTTGATCACTGCTGTTCTTTTGTTGCTGTCTTTG	25	46	8	28	2	4	1	9	4	9	0	6	3	0	1	6	2	2	7	1	15	49	8	1	3	1	1	2	0	3	3	0	0	10	7	10	10	7	0	0
OTU_986	Arthropoda	Insecta	Lepidoptera				87.64	Private	ATTATCTGGAATAATTGCGCATTCTGGAGGTTCTGTTGATTTAGCTATTTTTAGTTTACATTTAGCAGGTGTTTCTTCATTATTAGGAGCAATTAATTTTATTACAACTGTATTTAATATGAGAGCTAGTGAAATGAGTATTTATGAAATACCTTTATTTTGTTGAGCTATTTTAATTACAGCTTTTTTATTATTATTATCTTTA	11	8	0	3	2	4	4	0	13	16	16	0	4	12	0	4	14	7	1	6	33	11	10	9	2	4	7	9	3	7	4	3	6	7	3	2	2	2	0	0
OTU_987	Arthropoda	Arachnida					78.28	Published	TTTATCAAACCAAATATTTCATAGAACTCCAGCTATTGATATAACTATCTTCTCTTTACATTTAGCCGGGGCTTCTTCTATTTTAGGTGCAATCAATTTTATTACCACCATTCTAAACATACGACCTATTAACATAAAATTTGAAATAGTACCATTATTTGTTTGATCTGTTTTTATTACGGCTATTTTACTGCTTCTTTCCCTT	0	0	0	0	0	0	0	0	106	0	0	27	0	0	0	0	0	0	0	0	0	0	0	0	0	0	0	0	0	0	0	0	0	2	1	0	0	0	0	0
OTU_988	Arthropoda	Insecta					76.27	Private	ATTATCATCAGTAGAAGCACATAGTGGACCAGCAGTGGATAGAGCAATCTTTTCATTGCATTTGGCAGGAGCATCATCAATTAGAGGAGCGATTAACTTTATTACAACAATTGGGAATATGCGAGCACCAGGAAGAACAATGCATCGAAGACCATTGTTTGTATGGGCAGTAAGAATTACAGCAGTATTGTTGTTGTTGTCATTG	0	0	0	1	1	3	5	2	2	1	6	0	3	0	2	3	4	2	0	0	32	0	0	1	4	5	0	0	0	1	0	1	1	0	1	0	0	2	0	0
OTU_989	Rotifera	Monogononta	Ploima	Synchaetidae	Polyarthra		95.31	Published	TCTGGCAGATGCTAAATATCATTCAGGTATTTCTGTTGATTTAGCTATTTTTAGCTTACATTTAGCTGGTATTTCTTCTATTTTAGGAAGAATTAATTTTTTAACTACTATTATTTGTTCTCGTACTACAAAATTGATTTCTATGGATCGTTTACCTTTGTTATTATGAGCAATTTCAGTTACAGCTGTATTGTTAATTACAAGATTA	3	1	5	4	12	13	4	9	1	3	5	0	36	21	5	15	0	4	5	9	0	0	0	0	0	0	3	4	17	21	11	16	1	2	4	3	10	30	0	0
OTU_990	Ascomycota	Sordariomycetes	Hypocreales	Cordycipitaceae			90.69	Published	ATTATCAGGAATACAAAGCCATAGTGGACCTAGTGTAGATTTAGCTATTTTTGCACTACATCTTTCAGGGGTAAGTAGTTTATTAGGTGCTATTAATTTTATAACTACAATAGTTAATATGAGAACACCTGGTATAAAATTACACAAATTAGCATTATTTGGATGAGCTGTAGTTATTACAGCTGTGTTATTATTATTATCTTTA	0	1	6	10	2	4	3	1	0	4	5	0	6	5	0	6	3	2	2	2	66	44	10	24	2	7	10	7	7	6	1	2	1	9	0	3	7	4	0	0
OTU_991	No Match	No Match	No Match	No Match	No Match	No Match			AGTGATAAACTCGTGCCAGCCACCGCGGTTATACGAGGGGCTCAAATTGATATTACACGGCGTAAAGCGTGATTaaaaaacaaaaaaaCTAAAGCCAAACACTTCCCAAGCTGTCATACGCTACCGGAACATAAACGAAGCCCTATAACGAAAGTAGCTTTAACACCTTTGAACTCACGACAGTTGAGGAACAAACTGGGATTAGATAC	6	8	2	8	1	6	12	1	1	8	0	26	8	4	5	4	3	3	5	2	8	0	1	2	5	3	6	2	4	1	2	4	3	8	2	0	3	5	0	0
OTU_992	Heterokontophyta	Oomycota	Albuginales	Albuginaceae	Albugo	Albugo candida	100	Published	TTTATCTAGTATACAAGCACATTCAGGTCCTTCGGTAGATTTAGCAATTTTTAGTTTACATTTATCTGGAATTTCTTCTTTATTAGGAGCAATAAATTTTCTTTCGACTATATATAACATGAGAGCTCCAGGTTTAAGTTTTCATAGACTTCCTTTATTTGTATGGTCAATTATTATTACGGCGTTTTTATTATTATTAACTTTG	1	2	8	8	1	0	1	0	1	0	4	0	0	0	4	1	1	0	0	0	121	64	3	1	0	7	7	19	3	7	3	2	7	7	5	5	4	5	0	0
OTU_993	Arthropoda	Insecta					78.29	Published	TCTTAGCGGAATCGAGTCTCATTCAGGCCCAGCCGTGGATTTAGGTATCTTTAGTTTACATTTGTCTGGCTTATCTTCTATTTTAGGATCTATTAATTTTATTGTTACAATTGTTAATATGCGCGCAATTggtttgactttttacactttaccgctttttgtttgatctgtttttattacgtcttttttATTACTGTTGTCTTTA	0	0	1	1	0	0	4	1	2	0	1	2	0	0	4	0	0	0	0	0	173	0	3	0	0	0	8	4	0	0	0	0	2	2	3	1	3	5	0	0
OTU_994	Arthropoda	Insecta					80.9	Published	TTTATCTGGAAATGAAGCGCATTCTGGTGCTGCTGTAGATCTGGCTATTTTTAGTTTGCATTTAGCCGGAATTTCTTCTATTGCTGGTGCTATTAACTTTATTACAACTATTGTTAACATGCAATTTCGGGGTGGTGCTCTTTACAGGTTACCACTATTTTGTTGAGCTGTTTTAATTACTGCTATTTTACTCCTTCTATCACTA	12	1	2	10	0	5	4	0	2	11	8	1	5	7	4	15	4	1	1	2	0	62	16	5	8	10	13	11	15	7	2	6	10	3	3	7	7	5	0	0
OTU_995	Arthropoda	Collembola	Poduromorpha	Hypogastruridae	Xenylla	Xenylla mediterranea	100	Published	TCTAGCCGCAGGGATCGCCCATGCCGGAGGATCAGTTGACTTATCAATCTTTAGCCTCCACTTGGCAGGGGCTTCTTCTATCTTAGGAGCTGTGAACTTCATTACTACTATTATTAATATACGAGCCCCTGGAATATCATGAGACCAAACACCATTATTTGTTTGGTCTGTATTTCTTACCGCCATCCTACTTCTTCTGTCTTTA	20	16	1	2	6	4	2	0	0	2	2	0	3	1	12	6	0	0	0	0	40	12	37	18	6	0	2	0	2	0	9	9	10	8	2	2	4	14	0	0
OTU_996	Ochrophyta	Raphidophyceae					82.91	Published	ACTAAGTAGTATTCAAGCACACTCAGGGCCTTCAGTAGATCTAGCAATTTTTAGTCTACATCTTTCAGGAGCTTCTTCTATTATGGGTGCAATTAACTTTATTGTAACTATATTTAATATGCGTGCTCCAGGACTATTTATGCATAAACTACCTCTATTCGTATGAGCTGTGCTAATTACAGCTTTTCTACTACTACTATCTCTA	5	3	0	1	0	1	0	0	0	0	0	0	3	0	1	6	0	1	0	3	25	1	7	0	8	1	0	0	0	0	1	0	3	4	0	0	0	0	0	0
OTU_997	Rotifera	Monogononta	Ploima	Synchaetidae	Polyarthra		95.19	Published	TCTGTCTGATGCTAAGTATCATTCTGGTATTTCTGTTGATCTTATTTTCAGTCTTCATTTAGCTGGTGTCTCTTCTATTTTAGGTAGAATCAATTTTCTTACTACTATTGTGTGTTCTCGTACTACTAAGCTAATCTCTTTGGATCGTTTACCTTTATTACTATGGGCTATCTCTATTACTGCCATCTTACTTATTACAAGACTT	0	1	10	17	203	199	25	201	464	24	342	379	11	23	14	23	69	54	5	3	0	0	0	5	0	0	2	2	4	11	1	6	19	15	2	3	278	331	0	0
OTU_998	Cnidaria	Hydrozoa					80	Published	TCTGTCAGGAGTACAATCACACTCTGGACCTTCAGTTGATTTAGCAATTTTTAGTCTTCACTTAGCTGGAGCTGCATCTATTCTTGGGGCGATTAATTTTATAACTACTATTTTTAACATGAGAGCTCCTGGCTTAACTATGCATAGACTCCCATTGTTTGTTTGGTCCGTTTTAATTACTGCTTTCTTGTTAATTTTATCTCTT	2	5	10	4	5	4	3	9	9	5	6	3	7	6	10	8	4	1	2	2	2	0	0	4	5	3	5	0	4	7	5	1	7	8	1	2	7	4	0	0
OTU_999	Cnidaria	Anthozoa					75.52	Published	ACTTAGTGGGATTGAGGCCCACTCCGGAGGAGCTGTTGATTTAGGTATTTTCAGTCTGCATCTTGCTGGTGCTTCCTCTATTATGGGTGCAATTAATTTTATTGTAACAATTGTAAACATGCGTGCACTTGGTATGACGTTTTATACGTTGCCGCTGTTTGTTTGATCTGTTCTTATCACTGCTTTTTTACTACTACTATCTTTA	0	7	1	1	0	0	0	3	0	0	7	0	0	4	0	2	1	1	0	0	33	0	0	0	32	2	34	1	2	0	1	4	0	1	1	12	0	0	0	0
OTU_1000	Porifera	Demospongiae					82.32	Published	GATAGCAAGTATAGAATACCACTCAGGGGGAGCAGTGGACCTAGGGATATTCAGCTTACATTTAGCGGGGATATCGTCAATACTAGGGGCAATGAACTTCATAACAACAATAATAAATATGAGAGCGCCAGGGATGACAATGCATAAGCTACCATTGTTTGTGTGAGCAGTATTAATAACAGCAGTGTTATTATTATTATCATTA	0	0	0	0	0	0	0	0	0	0	0	0	0	0	0	0	0	0	0	0	0	0	0	0	0	0	0	0	0	0	0	0	0	0	0	0	0	0	0	0
OTU_1001	Basidiomycota	Agaricomycetes					81.37	Published	ATTGTCTAGTATACAATCACATTCAGGAGGATCAGTGGATTTAGCGATATTCAGTTTACATCTAGCAGGAGTATCTTCCCTATTAGGAGCAATAAATTTTATAACCACTGTAATAAATATGAGAACCCCTGGACAATCATTACATAAGTTGCCATTATTTGTATGATCTATATTTGTTACTGCAATATTATTGTTACTATCTTTA	5	0	7	2	0	0	5	14	0	0	1	2	0	0	0	0	0	0	1	0	82	35	5	9	5	1	2	3	0	6	1	0	21	4	4	2	4	5	0	0
OTU_1002	Cnidaria	Scyphozoa					79.6	Published	ATTATCTTCAATTGAAAGCCACTCAGGTGGTTCTGTTGATCTAGCTATTTTTAGTTTACATTTAGCAGGTGCATCTTCAATACTAGGAGCTATGAACTTTATAACAACAGTTCTTAATATGAGATCTCCTTCATTAAAAATGCATAGAATACCTTTATTTGTTTGAGCTGTTTTCATAACAGCTATATTATTACTGTTATCCTTA	5	6	5	1	0	3	8	7	7	5	5	1	8	2	8	10	8	1	1	5	120	0	1	3	22	1	4	0	9	1	0	2	5	2	6	0	4	4	0	0
OTU_1003	Basidiomycota	Agaricomycetes					83.33	Published	TTTGTCTAGTATACAATCTCATTCAGGTGGTTCAGTAGATTTAGCAATCTTTAGTTTACATTTAGCAGGAGTTTCCTCTTTATTAGGAGCTATAAATTTTATCTCTACAGTACTTAACATGAGAACATCTGGACAATCATTACATAAATTACCATTATTTGTTTGATCAATATTTGTAACAGCTATTTTATTGTTATTATCTTTA	0	0	0	0	0	0	0	0	0	0	0	0	0	0	0	0	0	0	0	0	0	0	0	0	0	0	0	0	0	0	0	0	0	0	0	0	0	0	0	0
OTU_1004	Cnidaria	Hydrozoa					76.72	Private	ATTAAGCGGAGTATTTGCACATTCAGGCGCTGGCGTAGATTGTGCAATATTCAGTTTACATTTGGCAGGTATTTCATCAATTGCGGGGGCAATTAATTTTATAGTGACCATTCAAAATATGAGGTGTCGAGGTATGACATATAATAGATTACCTTTATTTGTTTGAACAGTATTAGTAACTGCAATATTATTGTTATTATCTCTA	2	9	7	4	5	7	9	4	3	7	1	0	0	7	6	9	5	6	0	3	7	20	4	0	7	11	7	2	3	5	2	3	6	6	4	6	1	8	0	0
OTU_1005	Basidiomycota						77.95	Private	GCTTGCAGGAATTCAAAGCCACTCAGGTGGTTCGGTAGACCTTGCAATCTTCAGCCTTCACCTTGCAGGTATCAGTAGTCTACTAGGAGCTATGAATTTTATTACAACAATTCTTAATATGCGAGCTCCTGGGATGACTCTACACAAGCTTCCTCTATTCTGCTGAGCGATCTTTGTAACAGCAGTACTACTTCTTCTAGCACTT	26	21	3	4	0	4	0	9	2	5	2	9	4	0	2	3	5	0	3	1	0	0	16	5	0	0	35	14	9	19	0	3	1	0	1	0	13	27	0	0
OTU_1006	Heterokontophyta	Oomycota	Pythiales				89.22	Published	TTTATCTAGTATTTTAGCACATTCAGGTCCTTCGGTTGATTTAGCAATTTTTAGTTTACATTTAGCTGGTATTTCTTCATTATTAGGTGCAATTAATTTTATAACAACAATTTATAATATGCGGGCACCTGGATTAACATTTCATAAATTACCATTATTTGTTTGGTCTGTTTTAATTACAGCATTTTTATTATTATTAAGTTTA	9	1	7	2	8	7	5	5	3	3	11	1	6	4	4	5	1	6	7	3	128	32	6	4	22	1	6	4	8	0	2	3	5	2	5	5	2	0	0	0
OTU_1007	Heterokontophyta	Oomycota					78.92	Published	ATTGTCAAGTATTGAAAGTCATTCAGGAGGTTCTGTTGATCTTGTTATTTTTAGTTTACATTTAGCAGGAGTTTCGTCATTATTAGGAGCTATTAATTTTATAACTACAATTTGTAATATGAGATTACCTAATATGACTTGGAATAGAATTCCATTATTTGTTTGGGCTGTTTTTATTACAGCTATTTTGTTATTATTATCATTA	3	5	6	5	6	13	5	6	1	4	3	4	3	0	0	1	2	3	1	3	0	97	1	0	1	2	20	2	2	1	1	3	3	7	4	0	5	2	0	0
OTU_1008	Bacillariophyta	Mediophyceae	Stephanodiscales	Stephanodiscaceae			93.14	Published	GCTGTCAAGTGCGACAGCTCATTCAGGCGGCTCTGTTGACTTAGCCATATTTAGTTTACATTTATCAGGCGCATCGTCTATCTTAGGTGCTATTAATTTTATTTGTACGATTTTTAACATGCGAGTAAAAAGTTTATCTTTTCATAACCTTCCATTATTTGTATGGTCTGTTTTAATTACAGCATTTTTATTACTACTATCTTTA	17	15	5	7	5	15	6	2	7	9	3	2	5	7	6	14	7	5	7	2	1	32	9	6	4	20	10	11	10	15	3	2	5	6	7	6	5	8	0	0
OTU_1009	Ochrophyta	Chrysophyceae					78.79	Published	GTTAAGTTCGGTTCAAGCTCATTCAGGACCATCAGTATGTCTTGCAATTTTTTCACTGCATTTAGCAGGAACATCTTCAATTTTAGGCGCTATCAATTTTATTAGTACTATTTTTAATATGAGAGCACCTGGAATTAGTATGCACAGATTACCTCTACTTGTTTGGGCAGTTTTAATTACTGCTTTTCTTCTATTACTATCGTTA	7	1	0	0	0	1	7	1	2	4	2	0	1	2	1	1	2	3	5	0	6	25	0	2	4	1	2	2	3	0	0	2	0	0	1	5	0	1	0	0
OTU_1010	Heterokontophyta	Oomycota	Pythiales	Pythiaceae			93.14	Published	ATTATCAAGTGTTCAAGCTCATTCAGGTCCATCAGTTGATTTAGCTATTTTTAGTTTACATTTAGCAGGTATTTCATCTTTATTAGGTGCAATTAATTTTTTATCAACTATTTATAATATGAGAGCTCCTGGTTATAGTTTTCATAGATTACCTTTATTTGTTTGGGCTGTTTTTATTACTGCATTTTTATTATTATTAACATTA	2	2	5	1	5	3	8	4	7	3	4	1	5	2	4	7	1	6	3	3	39	43	16	20	16	12	7	20	8	7	3	6	6	13	8	5	12	7	0	0
OTU_1011	Arthropoda	Collembola	Poduromorpha	Brachystomellidae	Brachystomella	Brachystomella parvula	100	Published	CCTCTCATCCAACCTTGCCCACGCCGGTAGATCTGTTGATCTATCTATTTTCAGCCTTCACTTAGCTGGAGCTTCATCAATTTTGGGAGCCGTTAACTTTATCACCACAATTATCAATATACGATCCCCAGGAATAACATGAGACCAAATTCCCTTATTCACTTGATCAGTATTTTTAACCGCTATTCTTCTTCTACTCTCTCTC	0	0	0	1	0	4	0	3	0	0	0	0	0	0	0	0	11	4	0	1	0	0	15	11	0	0	0	0	0	2	0	0	5	0	99	68	0	1	0	0
OTU_1012	Cnidaria	Scyphozoa					73.44	Published	GCTTTCTGCCATTGAAGCCCACCCAACACCGTCTGTTGACTTCGCAATTTTTAGTCTTCATCTAGCAGGAGCTTCATCTTTAGCAGGTTCAGTTAATTTTATTTCAACAATTTGAAACATGCGTGCTCGCGGAATGCGCATGGATAGAATTCCATTATTTGTATGATCGTTATTTATTACCACAATTTTATTATTGTTATCCTTA	4	7	8	3	4	6	5	24	8	0	1	1	6	2	13	4	7	4	5	0	23	39	5	7	5	6	2	6	12	1	2	1	10	8	13	6	7	13	0	0
OTU_1013	Porifera	Demospongiae					83.61	Published	GATATCTAGTATAGAGTACCACTCAGGGGGGGCAGTAGATTTAGGGATATTTAGCCTACACTTAGCAGGGGTATCATCAATATTAGGGGCGATGAACTTTATAACAACAATAGTAAATATGCGAGCGCCAGGAATGACAATGCATAAGTTACCATTGTTCGTATGATCAGTGTTAATAACAGCAGTGCTATTAATATTATCATTA	0	4	1	2	0	0	8	0	3	3	0	0	0	0	2	2	0	0	2	2	10	25	3	4	3	6	7	1	3	3	3	1	6	0	1	0	1	0	0	0
OTU_1014	Cnidaria	Scyphozoa					78.97	Published	CCTTAGCTCTATAGTAGCTCATTCAGGCGGTTCTGTCGATTTAGCTATATTTAGCTTACATTTGGCTGGAGTTTCTTCCTTATTAGGGGCTATTAATTTTATTACCACTATATTTAATATGAGAGTTCCTGGTCTTTCTATGCATAAACTTCCATTATTTGTTTGGTCGGTATTAATAACAGCGTTTTTATTGTTGTTCTCATTA	8	2	8	1	3	4	8	0	1	4	0	1	2	4	1	5	0	0	0	0	131	7	7	17	20	11	12	9	1	6	5	0	7	4	6	15	3	12	0	0
OTU_1015	Ochrophyta	Phaeophyceae					78.28	Published	TTTGAGTTCTATACAAGCTCATTCGGGTGGTTCCGTAGATTTAGCTATATTTAGCCTTCATGTTTCCGGTCTTTCTTCTCTATTGGGTGCTATAAATTTTATATGTACCATATTTAATATGCGTGTGCCTGGTTTATATATGCATCGCCTTCCTTTATTTGTTTGATCAGTTTTAATTACAGCATTTTTACTCTTATTATCCTTA	10	4	17	5	7	3	6	9	3	12	8	1	0	1	5	4	1	5	1	5	14	8	15	5	12	9	9	15	3	2	12	5	9	6	4	13	3	13	0	0
OTU_1016	Ochrophyta	Raphidophyceae					75.21	Published	ACTAAGTAGCATCCAAGCTCACTCAGGACCATCTGTTGATCTTGCTATCTTTAGTCTACACCTATCAGGAGCATCTTCTATTAGGGGAGCTATTAACTTTATCGTAACTATTTTTAATAGGCGCGCTCCAGGACTATTTAGGCATAAACTACCTCTATTCGTATGAGCTGTGCTTATTACAGCTTTCCTACTACTACTATCACTT	5	8	2	6	10	4	0	0	3	3	5	4	9	4	4	1	2	3	2	1	11	2	10	19	15	15	1	10	5	3	0	0	5	2	5	4	1	5	0	0
OTU_1017	Ascomycota	Leotiomycetes	Leotiomycetes_order_Incertae_sedis				85.78	Published	TTTATCTGGTATACAAAGTCACAGTGGACCTAGTGTGGATTTAGCAATATTTGCTTTACACCTATCCGGTATAAGTAGTTTACTAGGTGCAAATAACTTTATAACAACTATATTGAACATGAGAAGTCCTGGTATAAGGCTGCACAAATTAGCCTTATTTGGGTGAGCAATTTTAGTTACAGCTGTGCTATTATTATTATCTTTA	3	0	1	2	0	1	1	0	1	2	2	2	2	5	1	1	1	0	1	0	86	75	16	23	26	11	2	2	2	3	0	1	6	6	3	5	8	6	0	0
OTU_1018	Heterokontophyta	Oomycota					74.37	Published	ATTATCTAACGCAATCGCACATTCTGGTCCAGCTGTTGATTTTGCAATATTTAGTTTACATTTAGCTGGTATTTCATCAATAGCGGGTTCAATAAATCTTATTGTCACTATTTTATTTATGCGTTGCCGAGGTATGAAATTATTTGATATGCCTTTATTTGTATGATCTATTTTAATTACAGCTTTTTTATTATTATTATCGCTA	7	2	4	4	0	9	2	0	19	1	12	5	3	1	6	7	6	4	3	3	108	44	0	6	0	0	7	0	4	2	2	2	14	2	1	5	0	0	0	0
OTU_1019	Bacillariophyta	Mediophyceae	Thalassiosirales	Skeletonemataceae			90.69	Published	TTTATCAAGTGCAACAGCTCACTCTGGAGGTTCTGTAGATTTAGCAATTTTTAGTTTACACTTATCTGGTGCATCTTCTATTTTAGGAGCTATCAATTTTATTTGTACAATTTTTAATATGCGAGTAAAAAGTTTATCTTTCCATAATCTTCCTTTATTTGTATGGTCAGTTTTAATTACAGCATTTTTATTATTGTTATCGTTA	60	64	37	67	44	60	39	54	45	53	55	39	41	36	33	40	53	59	41	37	4	16	38	59	69	71	69	56	43	55	30	54	54	55	36	36	31	53	0	0
OTU_1020	Arthropoda	Insecta					76.26	Private	ATTGTCATCATCAGTGGCACACTCTGGTCCATCAGTTGATAGAGCGATTTTTTCATTGCATCTAGCAGGAGCATCTTCAATTTTGGGAGCACTAAACTTTATTACAACAATTATTAACATGCGTGCACCAGGTATGTCAATGCACCGTAGACCAAGATTTGTATAGGCAGTACTAATTACAGCAGTAAGACTGTTGTTGTCATTG	1	3	6	7	0	6	4	5	8	1	0	0	3	1	0	24	5	6	6	3	48	3	2	7	5	5	19	3	3	4	4	6	8	5	5	4	5	3	0	0
OTU_1021	Ochrophyta	Phaeophyceae					76.68	Published	ACTGAGTAGCATTGCTAGTCACTCTGGAGGGGCTGTAGATTTAGCTATCTTTAGTCTTCATTTATCAGGGGCAAGTAGTATTTTAGGAGCAATCAACTTCATTACAACCATCATGAATATGAGAGCTCCAGGGATGTCTATGCACCGACTACCATTATTCGTATGGTCAGTGTTTATTACGGCGTTTTTACTACTATTATCACTT	7	0	3	4	3	4	4	0	3	4	10	0	1	6	4	4	1	0	2	5	9	68	1	4	18	1	5	4	10	7	2	2	7	8	0	8	3	4	0	0
OTU_1022	Ascomycota	Leotiomycetes	Helotiales	Helotiales_incertae_sedis	Rhynchosporium		97.06	Published	TTTAAGTGGAGTACAAAGTCATAGTGGACCTAGTGTTGATTTAGCTATATTTGGATTACATTTATCTGGTGTAAGTAGTTTATTGGGAGCTGTAAATTTCATTACTACTATACTAAATATGAGAAGTCCAGGTATCAGGTTACATAAATTAGCCTTATTCGGATGAGCTGTAGTTGTTACAGCTGTATTATTATTACTATCATTA	0	0	1	0	0	0	0	0	0	0	2	0	0	0	0	0	2	0	0	0	0	0	0	0	0	0	0	0	0	1	0	0	0	0	0	1	1	0	0	0
OTU_1023	Ochrophyta	Phaeophyceae					72.83	Published	CCTTAGCGGAATCGAAGCACACTCCGGCGCGGCTGTAGATTTTGGTATCTTCTCTCTACATCTTGCAGGGCTCTCCTCCATTTTGGGAGCAATTAACTTCATTGTAACCATTTTCAATATGCGCGCTATTGGTATGACTATGCATACCTTACCGCTTTTCGTATGATCCGTTCTTATTACTGCCTTCTTACTTCTTCTATCTCTA	12	5	13	13	17	23	4	21	0	9	2	2	0	2	7	0	7	0	0	3	0	0	0	0	9	0	1	2	0	11	8	0	43	1	0	6	6	29	0	0
OTU_1024	Rotifera	Monogononta	Ploima	Brachionidae	Brachionus		96.3	Published	CCTTTCTGACTCTACCTATCATAGGGGTGTTTCTGTTGATCTTGCTATTTTTAGTTTACATCTTCTGTTTTCTTCAATTTTAGGTAGAATTAACTTTTTAACTACTATTATTTGTTCACGCACTACTAAAAGTATTTCTTTGGATCGTCTTCCTCTTATGTTATGAGCTCTTGCTGTTACGGCTATTCTTTTAATTACTAGACTA	24	26	46	42	55	67	33	26	17	39	28	8	23	24	27	39	15	16	18	16	0	0	1	0	0	0	6	1	6	8	54	61	55	37	18	26	64	66	0	0
OTU_1025	Rhodophyta	Florideophyceae					73.16	Published	TTTAAGCTCCGTTTTTTCCCATTCTGGATATGCTGTTGATCTTGCTATATTTAGTTTGCACTTAGCAGGTGTATCTTCAATTGCAGGTGCAGTTAATTTTTTAGTTACAATTTTTAATATGAGATGTTTAGGTATGTATTTGACAATAATGCCTTTATTCGTATGGACTATTTTTATTACAGCTATTTTGCTTTTATTATCTTTA	7	8	2	8	9	8	2	7	3	1	3	2	0	2	3	0	6	15	1	0	0	61	7	1	2	2	2	4	6	3	5	3	17	13	4	9	5	5	0	0
OTU_1026	Bacillariophyta	Bacillariophyceae					78.92	Published	ATTATCAGGTATAACAAGTCATTCTGGTGGTGCTGTTGACTTAGCAATTGTAAGTTTACATTTATCTGGTGCAGCTTCAATATTAGGAGCAATAAATTTTATTTGTACAATAATAAATATGCGTTCTAGTAGCTTGCCTTTCCATAAATTACCGTTATTTGCATGAGCTATTTTTATTACAGCATTTTTATTGCTATTGTCTTTA	1	1	1	9	2	3	1	3	2	8	8	2	1	4	1	6	2	3	1	0	3	27	7	3	9	5	3	7	11	10	6	2	10	5	3	5	6	3	0	0
OTU_1027	Ochrophyta	Phaeophyceae					80.79	Private	GTTAAGTAGCATTGCTAGCCATTCAGGAGGGTCTGTAGATTTAGCTATTTTTAGTCTTCACTTATCAGGGGCAAGTAGTATTTTAGGAGCTATCAACTTTATTACAACTATTATGAATATGCGAGCTCCAGGAATGTCAATGCATCGTCTACCTTTATTTGTATGGTCGGTATTTATTACGGCATTCTTATTATTATTATCACTT	4	3	8	10	5	1	5	9	4	6	5	1	4	2	5	5	4	3	6	4	54	3	18	4	5	8	10	9	7	11	3	4	14	4	2	3	2	1	0	0
OTU_1028	Arthropoda	Arachnida					78.53	Private	GCTTGCTATTATTGAAAGTAAAGGAGTTGATTTTGCTATATTTAGTATACATTTAGCTGGTATATCATCGTTAATGGGTGCGATTAATTTTATAACAACAATAATAAATATGCGTCATATTGGTTTAAATATGCATATCGTGCCTTTATTTGTTTGAGCTGTTTTAATAACAGCTGTTTTATTATTATTATCATTA	0	0	0	0	0	0	0	0	0	0	0	0	0	0	0	0	0	0	0	0	0	0	0	0	0	0	0	0	0	0	0	0	0	0	0	0	0	0	0	0
OTU_1029	Arthropoda	Insecta					75.81	Published	ATTGTCATCAGTAGAAGCACATAGTGGACCATCAGTAGATTTGGCGATCTTTGCCTTGCATTTGGCAGGAGCATCATCAATTATGGGTGCAATTAACTTTATTACAACGATCGTGAATATGCGAGCACCAGGGAGAACAATGCATCGATTGCCATTGTTCTGCTGGTCAGTAAGAATTACAGCAGTATTGTTGTTGTTGTCATTG	0	0	0	0	3	0	0	0	0	0	0	0	3	0	0	0	0	0	0	0	0	0	0	0	0	0	0	0	1	0	0	0	1	0	0	0	1	2	0	0
OTU_1030	Arthropoda	Insecta	Coleoptera				86.76	Private	TTTATCTAGTATTACCTCACATTCTGGTGGCTCAGTAGATTTAGCAATTTTTAGTTTACATTTATCTGGTGTCTCTTCTATTGCTGGCGCAATTAATTTTATGACTACAATAATAAATATGCGTGTAAAAGGtatgactttatatcgtttacctttatttatttgatctttatttttaactgcatttttattGGTTTTGACTTTA	14	6	17	19	5	0	16	4	8	28	5	2	0	1	9	6	2	0	5	1	0	0	5	2	18	0	2	1	2	5	1	2	4	8	0	0	10	6	0	0
OTU_1031	Bacillariophyta	Mediophyceae	Thalassiosirales	Skeletonemataceae			91.18	Published	TTTATTAAGTGTAATAGTTTATTTTGGAGGTTTTGTAGATTTAGTAATATTTAGTTTACATTTATTAGGTGTGTTTTTTATTTTAGGTGCTATTAACTTCATTTGTACTATTTTTAATATGCGAGTAAAAAGTTTATCTTTTCATAATCTTCCTCTATTCGTATGATCTGTTTTAATAACAGCGTTTTTACTGTTATTATCTTTG	0	1	0	0	0	0	0	0	0	0	0	0	0	0	0	0	0	0	0	0	0	0	0	0	0	0	0	0	0	0	0	0	0	0	0	0	0	0	0	0
OTU_1032	Porifera	Demospongiae	Spongillida	Spongillidae	Ephydatia	Ephydatia fluviatilis	100	Private	TTTAGCAGGCATACAAGCGCATTCTGGGGGATCGGTTGATATGGCAATATTTAGTCTTCACTTGGCGGGTATTTCTTCGATATTAGGGGCTATGAATTTTATCACCACAATCTTTAATATGAGAGCGCCCGGTATTACAATGGATAGACTGCCATTATTTGTATGATCTATTTTAATAACAGCCTTTTTATTATTATTATCTTTA	2	3	2	7	3	2	8	7	1	3	9	1	0	5	3	5	6	5	1	0	53	64	13	6	13	3	8	6	7	0	1	4	5	4	4	3	6	5	0	0
OTU_1033	Arthropoda	Insecta	Diptera	Chironomidae	Procladius		100	Private	TTTAGCCTCGGGTATTGCACATGCTGGAGCTTCAGTAGATTTAGCAATCTTTTCTCTTCACTTAGCTGGGGTTTCATCTATTTTAGGAGCTGTAAATTTTATTACAACTGTAATTAATATACGATCTAACGGTATTACCTTAGATCGAATACCTTTATTTGTTTGATCAGTAGTAATTACAGCTGTATTATTATTATTATCTTTA	4	1	1	0	0	1	6	1	0	0	3	0	0	0	3	0	3	0	2	0	90	24	0	2	14	4	9	3	0	1	0	0	2	2	0	9	9	2	0	0
OTU_1034	Ochrophyta	Phaeophyceae					83.33	Private	ATTAAGCAGTATTTTAGCACACTCTGGTCCAGCTGTTGATTTAGCAATTTTTAGTTTACATTTATCTGGAGCGGGTTCTATTTTAGGGGCTATTAATTTTATTTCAACTATTTTTAATATGCGTGCTCCTGGAATGCCTATGCACCGTATGCCGTTGTTTGTTTGGGCAGTATTAATTACAGCATTTTTATTACTATTATCTTTA	2	2	5	1	6	0	0	2	0	7	0	2	4	0	2	2	3	0	5	1	54	45	5	7	1	2	3	3	2	4	0	0	3	1	1	0	2	0	0	0
OTU_1035	Rhodophyta	Bangiophyceae					83.33	Published	ATTAGCTAGTGGCCAAGCACATTCAGGACCTTCAGTTGATTTAGCTATTTTTAGTTTACATATTGCAGGAGCATCTTCTATCTTAGGAGCAATTAATTTTATAGTAACTATTTTTAATATGCGTAGTCCAGGAATGTTTATGCATAAATTACCTTTATACGTATGATCAGTATTAATTACAGCATTCTTATTATTATTATCTTTA	4	6	4	9	2	4	2	2	1	1	8	4	2	0	4	0	9	0	7	13	25	0	2	0	7	1	6	4	5	7	3	2	15	1	2	3	5	5	0	0
OTU_1036	Arthropoda	Insecta	Lepidoptera				85.39	Private	TTTAAGTAGTGTTGAAGCTCATTCAGGTCCTTCGGTTGATTTAGCTATTTTTAGTCTTCATTTAGCCGGAGCTTCGTCAATCTTAGGGGCTATTAATTTTATTACAACTATTTTTAATATGCGTGCACCTGGGTTAACTATGCATCGTTTACCGTTATTAGTTTGAGCGGTTTTAATTACAGCTTTTTTATTATTACTATCTTTA	1	3	0	3	1	0	1	3	0	4	1	0	0	0	0	3	0	2	0	3	54	38	0	1	3	2	0	0	1	5	1	3	1	1	1	0	2	3	0	0
OTU_1037	Ochrophyta	Phaeophyceae					80.39	Published	TTTAAGCTCTATTCAAGCACATTCTGGTGGTTCAGTTGATTTGGCTATTTTTAGTCTTCATGTATCCGGGGTTTCATCTTTGTTAGGTGCAATAAATTTTATTTGTACCGTTTTTAATATGCGTGTTCCTGGACTTTATATGCATAGATTGCCTCTTTTTGTGTGAGCTGTTTTAATAACAGCTTTTTTACTTCTTTTATCACTT	6	0	1	1	0	4	7	4	6	14	5	1	5	8	12	5	8	2	2	9	29	10	1	3	16	1	8	2	1	2	8	0	7	6	1	2	5	1	0	0
OTU_1038	Heterokontophyta	Oomycota	Pythiales	Pythiaceae	Phytophthora	Phytophthora sp.	99.51	Published	CTTATCAAGTGTACAAGCACACTCTGGACCTTCTGTAGATTTAGCTATTTTTAGTTTACATTTATCAGGTATTTCTTCATTATTAGGTGCTATTAATTTTATTTCAACTATTTATAATATGAGAGCTCCTGGATTAAGTTTCCATAGATTACCTTTATTTGTTTGGTCTGTATTAATTACAGCATTTTTATTATTATTAACTTTA	10	6	1	12	14	6	6	4	6	8	4	0	0	2	1	0	6	3	2	6	13	6	36	34	12	20	21	9	6	6	6	4	16	4	5	1	7	3	0	0
[truncated: 3,998 more rows]
[truncated: 48 more columns]
