# Supplementary material for: Is it worth the extra mile? Comparing environmental DNA and RNA metabarcoding for vertebrate and invertebrate biodiversity surveys in a lowland stream
Source: PeerJ. 2024 Oct 24;12:e18016. doi: 10.7717/peerj.18016 (PMC11512801; doi:10.7717/peerj.18016)
Supplement: Supplemental Information 8 [file peerj-12-18016-s008.xlsx]

## Sheet: Sheet1
ID	Phylum	Class	Order	Family	Genus	Species	Similarity	Status	seq	LDNA_1	LDNA_2	LDNA_3	LDNA_4	LDNA_5	LDNA_6	LDNA_7	LDNA_8	LDNA_9	LDNA_10	LDNA_11	LDNA_12	LDNA_13	LDNA_14	LDNA_15	LDNA_16	LDNA_17	LDNA_18	LDNA_19	LRNA_1	LRNA_2	LRNA_3	LRNA_4	LRNA_5	LRNA_6	LRNA_7	LRNA_8	LRNA_9	LRNA_10	LRNA_11	LRNA_12	LRNA_13	LRNA_14	LRNA_15	LRNA_16	LRNA_17	LRNA_18	LRNA_19
OTU_1	Chordata	Actinopteri	Gobiiformes	Gobiidae	Neogobius	Neogobius melanostomus	100	Midori2	GCGGTTATACGAGAGGCCCAAGTTGACAAAAATCGGCGAAAAGCGTGGTTAGTGATATCACCTCCACTAAAGCCAAACACCTTCAAGGCTGTAATACGCCCCCGAAGACAGGAAGCCCAATCACGAAAGTAGCTTTAATTTTCATGAAGCCACGAAAGCTAGGAAA	468074	348126	294406	515129	403935	497509	473689	387074	447010	311620	398640	610214	353446	416010	447300	215992	411298	366008	316244	262501	0	200617	109530	170296	202012	141997	236630	277781	107256	98690	419246	232027	238837	59595	90454	30782	155394	249429
OTU_2	Chordata	Actinopteri	Perciformes	Percidae	Perca	Perca fluviatilis	100	Midori2	GCGGTTATACGAGAGGCCCAAGTTGATAGACATCGGCGTAAAGCGTGGTTAAGATTAAAGACAATACTAAAGCCGAACACCTTCAGAGCTGTTATACGCATCCGAAGGTAAGAAGTTCAACCACGAAAGTGGCTTTATAGCCCCTGAACCCACGAAAGCTACGATA	141452	135966	239921	170759	229381	114537	204704	249738	86851	408103	139310	70174	179315	97667	132036	241470	200296	225868	207452	416866	506707	470107	388505	313297	361006	412936	421971	378727	706201	389969	254240	379487	291270	278034	445453	505748	459670	422903
OTU_4	Chordata	Actinopteri	Cypriniformes	Leuciscidae	Leuciscus	Leuciscus leuciscus/idus	100	manual check	GCGGTTAAACGAGAGGCCCTAGTTAATAATACACGGCGTAAAGGGTGGTTAAGGAAAGCATAACAATAAAGCCGAATGGCCCTTTGGCTGTCATACGCTTCTAGGTGTCCGAAGCCCAATATACGAAAGTAGCTTTAATAAAGCCCACCTGACCCCACGAAAGCTGAGAAA	0	0	0	0	0	0	0	0	0	0	0	0	0	0	0	3940	8081	0	0	0	0	0	0	0	0	0	0	0	0	0	0	0	0	0	27816	0	0	19399
OTU_5	Chordata	Actinopteri	Cypriniformes	Cyprinidae	Cyprinus	Cyprinus carpio	100	manual check	GCGGTTAGACGAGAGGCCCTAGTTGATATTACAACGGCGTAAAGGGTGGTTAAGGATAAACAAAAATAAAGTCAAATGGCCCCTTGGCCGTCATACGCTTCTAGGAGTCCGAAGCCCTAATACGAAAGTAACTTTAATAAACCCACCTGACCCCACGAAAGCTGAGAAA	0	0	0	0	23591	28620	33237	0	0	0	47654	68510	73452	26917	70167	109198	84482	73414	49547	0	0	0	0	753	8720	0	0	0	0	7811	0	0	0	0	31353	0	0	1121
OTU_6	Chordata	Actinopteri	Perciformes	Gasterosteidae	Gasterosteus	Gasterosteus aculeatus	100	Midori2	GCGGTTATACGAGAGGCCCAAGTTGATGAATTACGGCGTAAAGAGTGGTTAAGCTAAAATTAAAACTAAAGCCGAACACCCCCAAAGCTGTTATACGCATCCGGAGGTGAGAAGTTCAACCACGAAGGTGGCTTTATCTAACCTGAACCCACGAAAGCTACGGCA	12778	123046	0	41430	69429	13810	18791	61960	195768	6310	67081	64972	0	10261	3761	37022	39032	5408	33505	0	96055	18307	69528	7574	59925	35146	47475	120113	0	71164	195139	28414	0	8077	44859	9930	0	15655
OTU_7	Chordata	Actinopteri	Anguilliformes	Anguillidae	Anguilla	Anguilla anguilla	100	manual check	GCGGTTATACGAGGGGCTCAAATTGATATTACACGGCGTAAAGCGTGATTaaaaaacaaaaaaaCTAAAGCCAAACACTTCCCAAGCTGTCATACGCTACCGGAACATAAACGAAGCCCTATAACGAAAGTAGCTTTAACACCTTTGAACTCACGACAGTTGAGGAA	71600	67456	79080	61268	39934	43437	67895	27352	60790	53880	58106	38048	74814	59813	92087	58803	64111	39989	58723	68385	90284	72516	113082	115746	94990	138949	49592	45538	28749	91120	46220	97805	78143	68401	62833	86493	61975	71826
OTU_8	Chordata	Actinopteri	Perciformes	Percidae	Sander	Sander lucioperca	100	manual check	GCGGTTATACGAGAGGCCCAAGTTGATAGACATCGGCGTAAAGCGTGGTTAAGACAAAAACAAAACTAAAGCCGAACACCTTCAGAGCTGTTATACGCACCCGAAGGTAAGAAGTTCAACCACGAAAGTGGCTTTATTACCCCTGAACCCACGAAAGCTACGATA	42239	14954	43785	56575	49879	54656	34917	58451	33576	58991	48952	21708	47884	47949	42542	17900	35360	69686	63449	45391	57725	77018	74558	81323	54156	58759	82062	52353	41001	68230	36533	76049	80735	112788	67477	107787	122376	63389
OTU_10	Chordata	Actinopteri	Cypriniformes	Cyprinidae	Barbus	Barbus barbus	99.412	Midori2	GCGGTTAGACGAGAGGCCCTAGTTGATATTATAACGGCGTAAAGGGTGGTTAGGGATAAATAATAATAAAGCCAAATGGCCCCTTGGCCGTCATACGCTTCTAGGTGTCCGAGGCCCTATATACGAAAGTAGCTTTAATTAACCCGCCTGACCCCACGAAAACTGAGAAA	38224	148260	65758	58988	43633	54811	21426	32541	38325	17802	63873	17083	69545	32473	35715	50951	39706	27740	40101	20890	68930	21321	29827	49396	24381	36244	13664	15117	8559	29405	40254	9147	9162	17924	7389	7514	18752	7703
OTU_11	Chordata	Actinopteri	Gobiiformes	Gobiidae	Ponticola	Ponticola kessleri	100	Midori2	GCGGTTATACGAGAGGCCCGAGTTGACAAACATTCGGCGTAAAGCGTGGTTAATAACTTATTTACTAAAGCCAAACACCTTTAAGGCTGTTATACGCCCCCAAAGGTAGGAAGACCCCTCACGAAAGTAGCTTTAATTACTATGAATCCACGAAAGCTAGGAAA	0	68720	42521	15672	30608	31120	22930	44044	34003	24725	63538	9237	20861	40122	20464	32410	20623	34902	43923	31458	39589	37184	33246	0	39905	20791	37361	24319	27790	43935	0	18894	9309	60692	39348	9090	21367	25377
OTU_12	Chordata	Mammalia	Rodentia	Cricetidae	Microtus	Microtus arvalis	100	Midori2	GCGGTCATACGATTAACCCAAACTAATTATTCTCGGCGTAAAACGTGTTACTAGAAATATGCAAAATAGAATTAAAATCCATCCAATATGTGAAAATTCATCGCTGGACCTAAAACCAATGACGAAAGTAATTCTAATAAGCCTGATACACGATAGCTAAGGTA	0	0	0	3	2	4798	0	0	1023	0	0	13126	32498	88608	24585	0	0	3681	20455	0	3926	1	4560	0	1157	27062	1846	7927	3258	2110	0	10260	195482	240240	0	8784	3746	19289
OTU_13	Chordata	Actinopteri	Cypriniformes	Leuciscidae	Rutilus	Rutilus rutilus	98.83	Midori2	GCGGTTAAACGAGAGGCCCTAGTTAATAATACACGGCGTAAAGGGTGGTTAAGGGAAGCACAATAATAAAGCCAAATGGCCCTTTGGCTGTCATACGCTTCTAGGTGTCCGAAGCCCAATATACGAAAGTAGCTTTAATAAAGCCCACCTGACCCCACGAAAGCTAGGAAA	64336	39341	106830	37232	37938	49309	61225	40100	60126	74095	35023	29611	56415	92406	65963	105544	54464	78148	89098	91869	31229	38044	34307	79359	38416	48680	37701	34734	53237	53605	103183	60350	40179	70014	68189	60531	55986	59176
OTU_14	Chordata	Mammalia	Artiodactyla	Bovidae	Bos	Bos taurus	100	manual check	GCGGTCATACGATTAACCCAAGCTAACAGGAGTACGGCGTAAAACGTGTTAAAGCACCATACCAAATAGGGTTAAATTCTAACTAAGCTGTAAAAAGCCATGATTAAAATAAAAATAAATGACGAAAGTGACCCTACAATAGCCGACGCACTATAGCTAAGACC	122391	17317	39557	9791	26435	8497	17844	35333	27466	19008	28367	41686	49481	29474	20421	23299	14885	17787	19275	524	4426	3211	8386	126430	13942	25158	3038	1388	3240	4699	0	4259	1161	4247	479	838	305	2355
OTU_15	Chordata	Mammalia	Rodentia	Myocastoridae	Myocastor	Myocastor coypus	100	Midori2	GCGGTCATACGATTAACCCTAATTAATAAACCCCGGCGTAAAGAGTATTAAAGATACAATAAAAATAAGATTAAATTTCATCTGGGTCGTAAAAAACTATAGATAAAAATAAAATCGATAACGAAGGTAATCTTAATATATCAGAATATACTAAAGCTAAGACA	0	18604	0	5685	7452	14692	5268	11122	17839	5445	25952	3485	2686	5465	4032	12847	8877	3041	8262	3613	10541	4635	35387	134862	15627	35220	8184	3865	4340	13899	0	5654	1342	6641	1916	2620	2915	4102
OTU_16	Chordata	Actinopteri	Siluriformes	Siluridae	Silurus	Silurus glanis	100	Midori2	GCGGTTATACGAAAGACCCTAGTTAATAGCCACGGCGTAAAGGGTGGTTAAGGAATATAACAAATAAAGCTAAAGACCCTCTAAGCCGTTATACGCACTCCGAGGACACGAAGCCCAAACACGAAAGTAGCTTTAAACCCCTCCTGACTCCACAAAAGCTAAGAAA	42096	14803	22251	10480	8631	18549	10248	0	1892	2071	5884	8522	45649	8920	0	4083	14161	11132	3255	6089	4444	1950	2980	0	18685	0	5068	2767	2022	0	0	9453	1967	8946	4011	12775	1585	8597
OTU_17	Chordata	Actinopteri	Cypriniformes	Leuciscidae	Rutilus	Rutilus rutilus	97.661	Midori2	GCGGTTAAACGAGAGGCCCTAGTTAATAATACACGGCGTAAAGGGTGGTTAAGGGAAGCACAATAATAAAGCCAAATGGCCCTTTGGCTGTCATACGCTTCTAGGTGTCCGAAGTTCAACATACGAAAGTAGCTTTAATAACGCCCACCTGACCCCACGAAAGCTGAGAAA	925	842	2365	1527	738	2018	2530	1113	1315	1186	740	690	1031	2002	1613	2109	1246	1936	2575	5741	2510	3547	2293	0	2180	974	2046	2784	1491	2630	493	3345	3661	3466	3482	4900	3302	2976
OTU_18	Chordata	Mammalia	Rodentia	Cricetidae	Ondatra	Ondatra zibethicus	100	Midori2	GCGGTCATACGATTAACCCAAACTAATTATTCTCGGCGTAAAACGTGTTACTAGGAAACCAAAAATAGAATTAAAAACCATCCAATATGTGAAAATTCATCGCTGGACCTAAAACCAATGACGAAAGTAATTCTAGAATTCTTGACACACGATAGCTAAGATC	0	0	11550	0	0	14313	0	0	0	0	0	0	0	1039	0	0	3998	5611	3095	3065	7480	7743	3597	0	12648	12048	6811	1709	3999	7954	0	9475	3099	5009	2783	2648	2254	1830
OTU_19	Chordata	Mammalia	Rodentia	Castoridae	Castor	Castor fiber	100	Midori2	GCGGTCATACGATAGACCCAAACTAATAAACCCCGGCGTAAAGCGTGTTTAAGAGCCTTACCCTGAATAAGAATAAACTTTACCTAGGCCGTAAAAAGCTATAGCTAAGGAAAAAATAACTTACGAAAGTAATCTTAATAAGTCTGATAACACGACAGCTAAGACC	0	0	0	7706	0	0	0	0	0	5434	13627	0	6589	0	7114	7227	11543	0	8574	0	8135	3740	11023	0	2534	5697	2323	590	5046	20017	0	5081	410	7954	1380	1103	2370	0
OTU_20	Chordata	Actinopteri	Esociformes	Esocidae	Esox	Esox lucius	100	Midori2	GCGGTTATACGAGAGGCCCTAGTTGATAATTGTCGGCGTAAAGAGTGGTTTAGAAAATAATTTAATAAAGCCGAACACCTCCTCAGTTGTTATACACATTTGAAGATATGAAGCCCTACCGCGAAAGCAGCTTTAAGTATCCTGAACCCACGACAGCTATGGTA	0	4368	0	0	0	12511	2317	724	0	0	0	0	4481	0	0	1651	0	0	1915	6969	5451	8920	5465	1	6765	0	3037	7793	3491	2662	0	8613	1801	0	1885	522	0	0
OTU_21	Chordata	Actinopteri	Cypriniformes	Tincidae	Tinca	Tinca tinca	100	Midori2	GCGGTTAAACGAGAGGCCCTAGTTGATATTACTACGGCGTAAAGGGTGGTTAAGGAAAGCATTATAATAAAGCCAAATGGCCCCTTGGCCGTCATACGCTTCTAGGTGCCCGAAGCCCAACCACACGAAAGTAGCTTTAACAAAGCCCACCTGACCCCACGAAAGCTGAGAAA	0	0	0	894	0	0	2525	0	0	0	0	0	0	0	2279	0	0	0	0	0	3759	880	1752	0	5577	6128	2097	2168	1884	2991	0	1226	0	12443	4425	3516	1022	0
OTU_22	Chordata	Actinopteri	Gobiiformes	Gobiidae	Neogobius	Neogobius fluviatilis	100	Midori2	GCGGTTATACGAGAGGCCCAAGTTGACAAAGATCGGCGTAAAGCGTGGTTAATGATAATTCCACTAAAGCCAAACACCTTCAAGGCTGTAATACGCCCCCGAAGACAGGAAGACCCATCACGAAAGTAGCTTTAATCTTCATGAACCCACGAAAGCTAGGAAA	0	0	0	0	0	0	0	0	0	4984	0	0	0	0	0	3114	0	1771	0	1300	8015	0	4355	0	0	5281	1586	713	0	667	0	0	12943	1787	1677	1807	0	0
OTU_23	Chordata	Actinopteri	Cypriniformes	Gobionidae	Gobio	Gobio gobio	100	Midori2	GCGGTTAAACGAGAGGCCCTAGTTGATTTTATCACGGCGTAAAGGGTGGTTAAGGAAGACAAAACAATAAAGCCGAATGGCCCTTTGGCCGTCATACGCTTCTAGGTGTCCGAAGCCCAATAGTACGAAAGTAGCTTTAATAAAACCCACCTGACCCCACGAAAGCTAAGAAA	0	0	0	0	8290	6907	0	0	0	6127	0	3637	0	7411	0	0	0	10300	6230	0	0	0	0	0	0	0	0	0	0	502	0	0	0	0	0	0	0	0
OTU_24	Chordata	Mammalia	Carnivora	Canidae	Canis	Canis lupus	100	Midori2	GCGGTCATACGATTAACCCAAACTAATAGGCCTACGGCGTAAAGCGTGTTCAAGATACTTTTACACTAAAGTTAAAACTTAACTAAGCCGTAAAAAGCTACAGTTATCATAAAATAAACCACGAAAGTGACTTTATAATAATCTGACTACACGATAGCTAAGACC	22957	0	0	0	6679	0	0	7653	0	2859	0	0	0	0	0	0	0	0	0	0	0	1254	2671	0	0	0	9470	776	2275	4966	0	0	1136	0	0	0	0	0
OTU_25	Chordata	Aves	Columbiformes	Columbidae	Columba	Columba palumbus	100	Midori2	GCGGTCACACAAGAGACCCAAACTAATCGTTCACGGCGTAAAGAGTGGACTCATGCTTATCGCATTAATTAAGGTCAAAACGCAGCTGAGCTGTCATAAGCTTAAGGTGCACTTAAAACCGCCCTAAATACGACCCTAAACTCATACGACTCAATGAACTCCACGAAAGCCAGGGTA	0	0	0	5422	0	0	1871	1452	0	0	3872	2900	272	1555	0	5417	0	4159	0	2890	438	1688	676	0	2274	0	1279	1197	948	1963	0	1260	0	0	0	180	3070	3110
OTU_27	Chordata	Mammalia	Artiodactyla	Suidae	Sus	Sus scrofa	100	Midori2	GCGGTCATACGATTAACCCAAATTAATAGATCCACGGCGTAAAGAGTGTTTAAGaaaaaaaaTCACAATAGAGTTAAATTATAACTAAGCTGTAAAAAGCCCTAGTTAAAATAAAATAACCCACGAAAGTGACTCTAATAATCCTGACACACGATAGCTAGGACC	0	0	0	1151	0	0	0	0	0	0	5914	0	0	5562	0	0	0	0	0	0	0	0	7209	0	0	0	1382	0	0	0	0	0	0	0	0	0	0	0
OTU_28	Chordata	Mammalia	Rodentia	Muridae	Rattus	Rattus norvegicus	100	Midori2	GCGGTCATACGATTAACCCAAACTAATTATTTTCGGCGTAAAACGTGCCAACTATAAATCTCATAATAGAATTAAAATCCAACTTATATGTGAAAATTCATTGTTAGGACCTAAGCCCAATAACGAAAGTAATTCTAATCATTTATATAATGCACGATAGCTAAGACC	0	0	0	0	0	0	0	0	1350	0	0	0	0	0	0	0	2	0	0	705	581	1056	0	0	1387	6064	863	6293	0	547	0	0	417	0	267	0	1	0
OTU_29	Chordata	Actinopteri	Cypriniformes	Leuciscidae	Alburnus	Alburnus alburnus	98.246	Midori2	GCGGTTAAACGAGGGGCCCTAGTTAATAATACGCGGCGTAAAGGGTGGTTAAGGAAATCAAACAATAAAGCCGAATGGCCCTTTGGCTGTCATACGCTTCTAGGTGTCCGAAGCCCAATATACGAAAGTAGCTTTAATAATGCCCACCTGACCCCACGAAAGCTGAGGAA	0	45	0	0	0	0	0	9	29	0	19	42	5	0	13	0	0	30	0	21	0	11	0	0	27	4028	18	14	14	0	0	0	0	0	0	0	0	0
OTU_30	Chordata	Actinopteri	Cypriniformes	Nemacheilidae	Barbatula	Barbatula barbatula	99.401	manual check	GCGGTTATACGAGAGGCCCAAGTTGATAGGCACGGCGTAAAGGGTGGTTAAGGAAAGCATAAATAAAGCCAAAGGGCCTCCCGGCCGTCATACGCTCCCGAGTGTCCGAAGCCCCTAAACGAAAGTAGCTTTAGTACCGCCCACCTGACCCCACGAAAACTGAGAAA	0	0	11307	0	0	0	6136	0	0	0	0	0	0	0	0	0	0	0	0	744	0	0	0	0	0	0	0	0	0	0	0	0	0	0	0	0	0	0
OTU_32	Chordata	Mammalia	Rodentia	Muridae	Apodemus	Apodemus sylvaticus	100	Midori2	GCGGTCATACGATTAACCCAAACTAATTACTTCTCGGCGTAAAACGTGCTAACTAGAAACAACAAATAGAACTAAAATCCAACTAATATGTGAAAATTCATTGTTAGGACCTAAGCTCAATAACGAAAGTAGTTCTAATAATTCTACCCTGCACGATAGCTAAGATC	0	0	0	0	0	0	0	0	0	0	6857	0	0	0	0	0	0	0	7757	0	0	0	4713	0	0	0	0	0	0	4168	0	1162	0	0	0	0	0	0
OTU_33	Chordata	Actinopteri	Perciformes	Gasterosteidae	Pungitius	Pungitius pungitius	100	manual check	GCGGTTATACGAGAGGCCCAAGTTGATGAACATCGGCGTAAAGAGTGGTTAAGCTAAAATTAAAACTAAAGCCGAACGTCCCCAAAGCTGTTATACGCACCCGGGGGTAAGAAGTTCAACCACGAAGGTGGCTTTATTAAACCTGAACCCACGAAAGCTACGGCA	0	0	10909	0	0	0	0	0	0	0	0	0	0	0	0	0	0	0	0	0	0	2557	0	0	0	0	586	0	0	0	0	0	561	0	0	0	0	0
OTU_34	Chordata	Aves	Gruiformes	Rallidae	Fulica	Fulica atra	100	Midori2	GCGGTCATACAAGAAGCCCAAATTAACCGTCACCCGGCGTAAAGAGTGGTAACTTACTATTATCTAACTAGGATCAAAGTACAACTAAGCTGTCATAAGCCCATGATGTACCTAAAACCACCCTAAAAACGATCCTAGCACTAACGATCAACTAAACACCACGAAAGCCAAGACA	0	0	0	0	0	0	0	0	0	0	0	2097	0	0	0	0	0	604	0	905	2038	1439	184	0	937	0	351	0	0	3862	0	895	536	0	592	471	0	0
OTU_35	Chordata	Actinopteri	Pleuronectiformes	Pleuronectidae	Platichthys	Platichthys flesus	100	manual check	GCGGTTATACGAGAGGCCCAAGTTGACAAACAACGGCGTAAAGAGTGGTTAGGGGATTTACTAAACTAGAGCCGAACGCTTTCAAAGCTGTTATACGCACCCGAAAGTATGAAACCCAATTACGAAAGTAGCTCTACCTATCCTGAACCCACGAAAGCTAAGGAA	0	0	0	0	0	0	0	0	0	0	0	0	0	0	0	0	0	0	0	0	0	0	0	0	0	0	4870	0	0	0	0	0	0	0	0	0	0	2264
OTU_38	Chordata	Actinopteri	Cypriniformes	Leuciscidae	Chondrostoma	Chondrostoma nasus	97.674	Midori2	GCGGTTAAACGAGAGGCCCCAGTTAATAATACACGGCGTAAAGGGTGGTTAAGGAAAGTATTAACAATAAAGCCGAATGGCCCTTTGGCTGTCATACGCTTCTAGGTGTCCGAAGCCCGTTATACGAAAGTAGCTTTAACAAAGCCCACCTGACCCCACGAAAGCTGAGAAA	1427	23	95	325	131	528	485	86	32	123	180	10	45	19	137	25	26	158	22	66	39	165	95	0	198	91	59	70	73	484	5	103	18	83	104	402	46	18
OTU_40	Chordata	Actinopteri	Cypriniformes	Leuciscidae	Rutilus	Rutilus rutilus	97.674	Midori2	GCGGTTAAACGAGAGGCCCTAGTTAATAATACACGGCGTAAAGGGTGGTTAAGGGGAGCACAAATAAAGCCAAATGGCCCTTTTGGCTGTCATACGCTTCTAGGTGTCCGAAGCCCAATATACGAAAGTAGCTTTAATAAAGCCCACCTGACCCCACGAAAGCTGAGAAA	25704	82	698	97	5872	6934	2435	17364	2246	176	92	6815	4630	21183	13460	3855	2142	13585	1177	2848	565	3198	1968	0	5224	1905	4431	1066	2507	3577	215	8449	17537	5527	1489	4242	3150	3484
OTU_41	Chordata	Mammalia	Rodentia	Cricetidae	Arvicola	Arvicola amphibius	99.39	Midori2	GCGGTCATACGATTAACCCAAACTAACTATTCTCGGCGTAAAACGTGTTACTAGACATATAAAAAATAGAATTAAAATCCATCCAATATGTGAAAATTCATCGCTGGACCTAAAACCAATGACGAAAGTAATTCTAGTATACTTGATACACGATAGCTAAGATC	0	0	0	0	0	0	0	0	0	0	0	0	0	0	0	0	0	0	0	0	0	0	0	0	2876	0	0	1023	710	0	0	0	0	0	0	0	0	0
OTU_42	Chordata	Actinopteri	Cypriniformes	Gobionidae	Pseudorasbora	Pseudorasbora parva	100	manual check	GCGGTTAAACGAGAGGCCCTAGTTGATAATATTACGGCGTAAAGGGTGGTTAAGGAAAATAAATTAATAAAGCCAAATGGCCCTTTGGCCGTCATACGCTCCTAGGTGTCCGAGGCCCGATTTTACGAAAGTAGCTTTAACATAATTAACCTGACCCCACGAAAGCTGAGAAA	0	0	0	0	0	0	0	0	0	0	0	0	0	0	0	0	5215	532	0	0	0	0	0	0	0	0	0	0	0	0	0	9462	0	0	0	0	0	0
OTU_43	Chordata	Actinopteri	Cypriniformes	Leuciscidae	Abramis	Abramis brama	97.11	Midori2	GCGGTTAAACGAGAGGCCCTAGTTAATAATACACGGCGTAAAGGGTGGTTAAGGAAAACATAACAATTAAAGCCGAATGGCCCTTTGGCTGTCATACGCTTCTAGGTGTCCGAAGTTCAACATACGAAAGTAGCTTTAATAACGCCCACCTGACCCCACGAAAGCTGAGAAA	412	1455	881	2033	1250	1756	2118	1526	1177	904	648	1349	804	1200	1398	1768	694	1424	1370	1647	2154	978	2593	0	1638	642	1048	1108	495	2276	0	1222	861	1223	1906	2138	2728	1280
OTU_44	Chordata	Actinopteri	Cypriniformes	Leuciscidae	Leuciscus	Leuciscus aspius	98.246	Midori2	GCGGTTAAACGAGAGGCCCTAGTTAATAATACACGGCGTAAAGGGTGGTTAAGGAAAGCATAACAATAAAGTCGAATGGCCCCTTGGCTGTCATACGCTTCTTGTCCGAAGCCCAATATACGAAAGTAGCTTTAATAAGGCCCACCTGACCCCACGAAAGCTGAGGAA	0	0	988	158	0	227	0	452	107	0	0	0	0	0	367	0	486	0	418	0	36	650	45	0	380	0	915	235	0	240	0	31	0	120	283	280	139	67
OTU_45	Chordata	Actinopteri	Salmoniformes	Salmonidae	Salmo	Salmo salar	100	Midori2	GCGGTTATACGAGAGGCCCTAGTTGATAACTACCGGCGTAAAGAGTGGTTACGGAAAAATATTTAATAAAGCCGAACACCCCCTCAGCCGTCATACGCACCTGGGGGCACGAAGATCTACTACGAAAGCAGCTTTAATTATACCTGAACCCACGACAGCTACGACA	0	19474	0	0	0	0	0	0	0	0	0	0	0	0	0	0	0	0	0	0	0	0	0	0	0	0	0	0	0	0	0	0	0	0	0	0	0	0
OTU_46	Chordata	Actinopteri	Cypriniformes	Xenocyprididae	Ctenopharyngodon	Ctenopharyngodon idella	100	Midori2	GCGGTTAAACGAGAGGCCCCAGTTGATAACACCACGGCGTAAAGGGTGGTTAAGGAAAGCAAAACAATAAAGCCAAATGGCCCTTTGGCCGTCATACGCTTCTAGGTGTCCGAAGCCCGATCATACGAAAGTAGCTTTAACAAAGCCCACCTGACCCCACGAAAGCTGAGAAA	0	0	0	0	0	0	0	0	0	0	0	0	2931	0	0	0	0	0	0	0	0	0	0	0	0	0	0	0	0	0	0	470	0	0	0	0	0	0
OTU_48	Chordata	Actinopteri	Cypriniformes	Leuciscidae	Leuciscus	Leuciscus aspius	100	Midori2	GCGGTTAAACGAGAGGCCCTAGTTAATAATACACGGCGTAAAGGGTGGTTAAGGAAAGCATAACAATAAAGTCGAATGGCCCCTTGGCTGTCATACGCTTCTAGGTGTCCGAAGCCCAATATACGAAAGTAGCTTTAATAAGGCCCACCTGACCCCACGAAAGCTACGATA	0	0	27728	5150	0	5510	666	13268	3116	2431	6134	0	0	5248	10290	1	15193	1942	12723	786	1012	2162	1498	0	9690	0	7906	4901	92	6756	0	768	3	3815	696	8837	2377	567
OTU_50	Chordata	Actinopteri	Perciformes	Percidae	Perca	Perca fluviatilis	97.561	Midori2	GCGGTTATACGAGAGGCCCAAGTTGATAGACATCGGCGTAAAGCGTGGTTAAGATTAAAGACAATACTAAAGCCGAACACCTTCAGAGCTGTTATACGCACCCGAAGGTAAGAAGTTCAACCACGAAAGTGGCTTTATTACCCCTGAACCCACGAAAGCTAGGAAA	56	90	293	540	251	389	494	476	167	690	262	83	307	271	292	174	274	595	593	2026	2809	4038	2541	106	1313	895	3172	2535	1738	2663	91	3239	3233	3414	3958	7519	7281	2205
OTU_51	Chordata	Actinopteri	Cypriniformes	Leuciscidae			97.093	Midori2	GCGGTTAAACGAGAGGCCCTAGTTAATGATACACGGCGTAAAGGGTGGTTAAGGAAAACATAATAATAAAGCCAAATGGCCCTTTGGCTGTCATACGCTTCTAGGTGTCCGAAGCCCAATTATACGAAAGTAGCTTTAATAAAGTCCACCTGACCCCACGAAAGCTGAGAAA	0	25	11	9	7	8	9	11	22	8	2118	22	1913	13	18	29	3	22	1254	1591	16	7	12	0	6	11	7	7	10	1521	0	7	2574	603	11	13	15	5
OTU_53	Chordata	Actinopteri	Gobiiformes	Gobiidae	Neogobius		96.988	Midori2	GCGGTTATACGAGAGGCCCAAGTTGACAAAAATCGGCGAAAAGCGTGGTTAGTGATATCACCTCCACTAAAGCCAAACACCTTCAAGGCTGTAATACGCCCCCGAAGACAGGAAGCCCAATCACGAAAGTAGCTTTTCATGAAGCCACGAAAGCTAGGAAA	0	0	0	0	0	2	0	2	0	0	0	4	0	3	0	3	0	1	0	0	14	462	1649	0	1247	0	805	637	500	8	0	454	1570	733	1676	922	6	1266
OTU_54	Chordata	Actinopteri	Cypriniformes	Leuciscidae	Leuciscus	Leuciscus leuciscus	97.576	Midori2	GCGGTTAAACGAGAGGCCCTAGTTAATAATACACGGCGTAAAGGGTGGTTAAGGAGAGCATAACAATAAAGCCGAATGGCCCTTTGGCTGTCATACGCTTCTAGGTGTCCGAAGTTCAACATACGAAAGTAGCTTTAATAACGCCCACCTGACCCCACGAAAGCTACGATA	840	353	362	1012	97	1097	1200	329	294	141	504	297	312	305	389	1498	2588	873	1881	1520	1265	2010	1029	0	756	322	834	942	393	1019	0	930	568	1216	4877	12027	3592	2838
OTU_55	Chordata	Actinopteri	Perciformes	Percidae	Sander	Sander lucioperca	97.546	manual check	GCGGTTATACGAGAGGCCCAAGTTGATAGACATCGGCGTAAAGCGTGGTTAAGACAAAAACAAAACTAAAGCCGAACACCTTCAGAGCTGTTATACGCATCCGAAGGTAAGAAGTTCAACCACGAAAGTGGCTTTATAGCCCCTGAACCCACGAAAGCTAGGAAA	45	86	389	541	213	367	433	455	152	682	262	63	306	273	285	178	269	578	572	1791	2717	3842	2225	80	1180	890	2971	2337	1900	2486	0	3081	3084	3226	3676	6814	6542	2121
OTU_56	Chordata	Actinopteri	Cypriniformes	Leuciscidae	Squalius	Squalius cephalus	97.093	Midori2	GCGGTTAAACGAGAGGCCCTAGTTAATAATACACGGCGTAAAGGGTGGTTAAGGAAAACATAACAATTAAAGCCGAATGGCCCTTTGGCTGTCATACGCTTCTTGTCCGAAGCCCAATATACGAAAGTAGCTTTAATAAAGTCCACCTGACCCCACGAAAGCTGAGAAA	0	1559	87	3155	1455	354	169	4734	89	5859	63	162	97	158	3677	150	76	173	117	44	973	38	1024	0	682	1565	383	30	23	453	0	396	452	43	518	56	107	41
OTU_57	Chordata	Actinopteri	Cypriniformes	Leuciscidae	Squalius	Squalius cephalus	97.093	Midori2	GCGGTTAGACGAGAGGCCCTAGTTGATATTACAACGGCGTAAAGGGTGGTTAAGGAAAACATAACAATAAAGCCGAATGGCCCTTTGGCTGTCATACGCTTCTAGGTGTCCGAAGCCCAATATACGAAAGTAGCTTTAATAAAGTCCACCTGACCCCACGAAAGCTGAGAAA	33	175	109	164	153	207	174	195	128	127	140	166	178	179	246	477	166	225	247	222	364	184	307	0	222	98	163	137	119	525	0	335	154	232	930	427	629	308
OTU_59	Chordata	Actinopteri	Cypriniformes	Leuciscidae	Vimba	Vimba melanops	100	Midori2	GCGGTTAAACGAGAGGCCCCAGTTAATAATACACGGCGTAAAGGGTGGTTAAGGAAAGTATAACAATAAAGCCGAATGGCCCTTTGGCTGTCATACGCTTCTAGGTGTCCGAAGTCCAATATACGAAAGTAGCTTTAGTAGAGCCCACCTGACCCCACGAAAGCTGAGGAA	7	3	33	4	0	2	19	7	12	0	19	29	0	0	1	30	3	4	5	2265	72	850	1	0	49	0	6	15	2	48	0	0	330	717	5	14	3	0
OTU_60	Chordata	Actinopteri	Cypriniformes	Leuciscidae	Leuciscus	Leuciscus leuciscus	98.802	Midori2	GCGGTTAAACGAGAGGCCCTAGTTAACAATACACGGCGTAAAGGGTGGTTAAGGAAAGCACAATAATAAAGCCAAATGGCCCTTTGGCTGTCATACGCTTCTAGGTGTCCGAAGCCCAATATACGAAAGTAGCTTTAATAAAGCCCACCTGACCCCACGAAAGCAGAAA	16	0	357	58	3479	1545	3874	80	2381	337	2740	225	76	251	432	653	185	223	78	21	164	759	3765	0	912	421	128	312	258	630	2	169	441	264	657	226	86	93
OTU_61	Chordata	Actinopteri	Cypriniformes				95.906	Midori2	GCGGTTAGACGAGAGGCCCTAGTTGATATTACAACGGCGTAAAGGGTGGTTAAGGATAAACAAAAATAAAGTCAAATGGCCCTTTGGCTGTCATACGCTTCTAGGTGTCCGAAGCCCAATATACGAAAGTAGCTTTAATAAAGCCCACCTGACCCCACGAAAGCTGAGAAA	64	140	580	441	348	727	768	411	328	407	511	428	586	668	840	1625	898	898	1013	1191	943	977	1140	152	847	269	680	536	673	1907	61	1407	955	951	3844	2633	2110	1183
OTU_62	Chordata	Actinopteri	Cypriniformes	Leuciscidae	Leuciscus	Leuciscus aspius	98.256	Midori2	GCGGTTAAACGAGAGGCCCCAGTTAATAATACACGGCGTAAAGGGTGGTTAAGGAAAGTATTAACAATAAAGTCGAATGGCCCCTTGGCTGTCATACGCTTCTAGGTGTCCGAAGCCCAATATACGAAAGTAGCTTTAATAAGGCCCACCTGACCCCACGAAAGCTGAGGAA	248	415	963	385	0	276	18	619	384	0	410	167	5	93	479	0	671	171	778	226	146	477	47	0	1068	0	937	805	9	565	0	0	0	193	0	1108	126	47
OTU_63	Chordata	Actinopteri	Cypriniformes	Leuciscidae			97.661	Midori2	GCGGTTAAACGAGAGGCCCTAGTTAATAATACACGGCGTAAAGGGTGGTTAAGGACCACAATAATAAAGCCAAATGGCCCTTTGGCTGTCATACGCTTCTAGGTGTCCGAAGCCCAATATACGAAAGTAGCTTTAACAAAGCCCACCTGACCCCACGAAAGCTGAGAAA	199	51	317	52	114	239	6093	192	2202	2209	256	245	97	284	5265	492	122	257	131	140	120	837	363	0	248	5596	1238	1144	3484	423	72	1072	270	1906	1352	1585	396	164
OTU_64	Chordata	Actinopteri	Cypriniformes	Leuciscidae	Rutilus	Rutilus rutilus	97.674	Midori2	GCGGTTAGACGAGAGGCCCTAGTTGATATTACAACGGCGTAAAGGGTGGTTAAGGGAAGCACAATAATAAAGCCAAATGGCCCTTTGGCTGTCATACGCTTCTAGGTGTCCGAAGCCCAATATACGAAAGTAGCTTTAATAAAGCCCACCTGACCCCACGAAAGCTGAGAAA	35	63	165	83	46	174	207	78	65	130	92	77	151	180	228	459	196	240	232	393	353	296	302	0	269	105	229	197	277	440	45	532	369	384	892	492	579	372
OTU_65	Chordata	Aves	Pelecaniformes	Ardeidae	Ardea	Ardea cinerea	100	Midori2	GCGGTCACACAAGAGACCCAAATTAACTGTAACACGGCGTAAAGAGTGGCAGCACGCTATCACACCAACTAAGATCGAAATGCAACTGAGCTGTCATAAGCCCAAGCTGCACCTAAGACCACCCTAAAAACAATCTTAGCATCTGCGATTGATAAAACCCACGAAAGCTAAGACC	0	0	0	0	0	0	0	0	0	0	0	0	0	0	0	0	0	0	0	0	0	0	0	0	0	0	0	0	0	0	0	0	0	0	0	245	152	0
OTU_66	Chordata	Mammalia	Rodentia	Sciuridae	Sciurus	Sciurus vulgaris	100	Midori2	GCGGTCATACGATTAACCCTAGTTAATAAAGCACGGCGTAAAGCGTGATTAAGGTTCTATCCTAAATAAGATTAAGCTTTGACTAAGCTGTAAAAAGCCTTAGTTAACATAAAAATATAAAACGAAAGTAATCTTATATCTCCTGAACTCACGATAGCTAAGACC	0	0	0	0	3500	0	0	0	0	0	0	0	0	0	0	0	0	0	0	0	0	0	0	0	0	0	0	0	0	0	0	0	0	0	0	0	0	0
OTU_67	Chordata	Actinopteri	Gobiiformes	Gobiidae	Proterorhinus	Proterorhinus semilunaris	100	Midori2	GCGGTTATACGAGAGGCCCAAGTTGACTAATATTCGGCGTAAAGAGTGGTTAATGACTTACTTACTAAAGCCAAACACCTTCAAGGCTGTTAAACGCCCCCGAGGGTAAGAGGAACCCCCACGAAAGTAGCTTTAATTATCATGAGCCCACGAAAGCTGGGAAA	0	450	1276	0	489	723	15	80	31	0	0	103	57	80	0	0	674	0	285	92	379	958	60	0	373	352	159	101	0	194	0	150	235	170	155	882	128	217
OTU_68	Chordata	Actinopteri	Cypriniformes	Leuciscidae	Squalius		96.491	Midori2	GCGGTTAAACGAGAGGCCCTAGTTAATAATACACGGCGTAAAGGGTGGTTAAGGAAAACATGATAATAAAGCCGAATGGCCCTTTAGCTGTCATACGCTTCTAGGTATCCGAAGCCCAATATACGAAAGTAGCTTTAACAAAGTCCACCTGACGCCACGAAAGCTGAGAAA	0	0	0	0	0	0	0	0	0	0	0	0	0	0	0	0	0	0	0	0	0	0	0	0	0	0	0	0	0	0	0	0	0	0	0	978	0	1474
OTU_71	Chordata	Mammalia	Rodentia	Muridae	Apodemus	Apodemus flavicollis	99.401	Midori2	GCGGTCATACGATTAACCCAAACTAATTACTTCTCGGCGTAAAACGTGCTAACTAGAAATTACAAATAGAACTAAAATCCAACCAATATGTGAAAATTCATTGTTCGGCCCTAAAATCAATAACGAAAGTAGTTCTAATAATTTTACTCTGCACGACAGCTAAGATC	0	0	0	0	0	0	0	0	0	0	0	0	0	0	0	0	0	0	0	0	0	0	1717	0	0	0	0	1191	0	1081	0	0	0	0	0	0	0	0
OTU_73	Chordata	Actinopteri	Cypriniformes	Leuciscidae			98.83	Midori2	GCGGTTAAACGAGAGGCCCTAGTTAATAATACACGGCGTAAAGGGTGTTAAGGAAGCACAATAATAAAGCCAAATGGCCCTTTGGCTGTCATACGCTTCTAGGTGTCCGAAGCCCAATATACGAAAGTAGCTTTAATAAAGCCCACCTGACCCCACGAAAGCTGAGAAA	829	392	8302	388	3234	8288	12224	1840	4582	8494	9550	5411	2476	7167	7887	14686	3049	6537	3130	1381	3608	1455	10367	0	7275	8160	2323	8009	8038	1962	957	5646	7844	7990	9582	6205	1888	3489
OTU_74	Chordata	Aves	Passeriformes	Corvidae	Corvus	Corvus corone	100	manual check	GCGGTCATACAGGAGACTCAAATTAACAGTATAACGGCGTAAAGGGTGGTAACATGCTATCTAAGTAACTAAGATTAAAAAGCAACTGAGCTGTAATAAGCCCAAGATGCTCATAAGGCCAACTACCAAAGAAGATCTTAGGCTGACGATTAATTGAAATCCACGAAAGCCAGGGCC	0	0	0	0	0	0	0	0	0	0	0	0	0	0	0	0	0	0	0	0	0	0	1101	0	0	0	0	0	172	0	0	0	0	0	0	0	0	0
OTU_76	Chordata	Aves	Galliformes	Phasianidae	Gallus	Gallus gallus	100	manual check	GCGGTCATACAAGAAACCCAAATCAATAGCTACCCGGCGTAAAGAGTGGCCACATGTTATCTGCACCAGCTAAGATTAAAATGCAACCAAGCTGTCATAAGCCTAAGATCCACCTAAACCCAACCCAAATCCATCTTAGCCTCAACGATTAATTTTAACCCACGAAAGCTAGGACC	0	0	0	1899	0	0	0	0	0	0	0	0	0	0	0	0	0	0	0	0	0	0	0	0	0	0	185	0	0	0	0	0	0	0	0	0	0	0
OTU_79	Chordata	Amphibia	Caudata	Salamandridae			91.515	Midori2	GCGGTTATACGAGAGACTCAAATTAATTTAATCGGCCCAAAGGGTGGTTAGACAGGCACACTAAATAAGGCTAAAAACTAACTCCGCTGTCGCACGCAGAAGTTaaaaaaaaTTCAATATCGAAAGTCGCCTTATCTAAAGCTTGAACCCACGACAGCTAGGAAA	0	0	0	0	0	0	0	0	0	0	0	0	0	0	0	0	0	0	0	0	0	0	0	0	2619	0	0	0	0	0	0	0	0	0	0	0	0	0
OTU_80	Chordata	Mammalia	Primates				86.25	Midori2	ACGGTCATACGATGAACCCAAGCTAATAGAGACTGGCGTAAAGAATGTTTTACATTATCCCTCAATAAAGCTAAATTTCACCTAAGTTGTAGAAAACCCTAGTTGATATAAAACAAACTACGAAAGTGGCTTTAATATTTCTGAATACACAATAGCGAAGATT	0	0	0	0	0	0	0	0	0	0	0	0	0	0	0	0	0	0	3226	0	0	0	0	0	0	0	0	0	0	0	0	0	0	0	0	0	0	0
OTU_81	Chordata	Actinopteri	Cypriniformes	Leuciscidae			96.512	Midori2	GCGGTTAAACGAGAGGCCCCAGTTAATAATACACGGCGTAAAGGGTGGTTAAGGAAAGTATTAACAATAAAGCCGAATGGCCCTTTGGCTGTCATACGCTTCTAGGTGTCCGAAGCCCAATATACGAAAGTAGCTAATAAAGTCCACCTGACCCCACGAAAGCTGAGAAA	447	1450	1048	2183	1157	1902	1840	1659	1235	902	696	1430	901	1346	1453	1836	740	1456	1521	1891	2386	1066	3644	0	1790	644	1129	1220	478	2454	0	1317	1033	1436	2003	2327	2888	1342
OTU_82	Chordata	Actinopteri	Cypriniformes	Leuciscidae	Rutilus	Rutilus rutilus	98.83	Midori2	GCGGTAAACGAGAGGCCCTAGTTAATAATACACGGCGTAAAGGGTGGTTAAGGGAAGCACAATAATAAAGCCAAATGGCCCTTTGGCTGTCATACGCTTCTAGGTGTCCGAAGCCCAATATACGAAAGTAGCTTTAATAACGCCCACCTGACCCCACGAAAGCTGAGAAA	1915	1483	3983	1469	1149	2836	2657	1465	1998	2717	1224	1121	1956	3233	2214	6613	3008	3060	3382	9926	3041	3419	2207	2005	3207	1712	2717	2877	2850	3404	1937	4344	3328	4049	5684	5404	3856	4923
OTU_83	Chordata	Actinopteri	Cypriniformes	Leuciscidae	Squalius		96.491	Midori2	GCGGTTAAACGAGAGGCCCTAGTTAATAATACACGGCGTAAAGGGTGGTTAAGGAAAACATAACAATAAAGCCGAATGGCCCTTTGGCTGTCATACGCTTCTAGGTGTCCCCCAATATACGAAAGTAACTTTAATAAAGTCCACCTGACCCCACGAAAGCTGAGAAA	0	29	14	19	28	21	24	42	61	33	16	33	18	19	34	36	15	22	28	3	10	6	1224	0	19	18	12	4	3	13	0	6	10	9	27	16	15	7
OTU_85	Chordata	Actinopteri	Cypriniformes	Leuciscidae	Leuciscus		95.322	Midori2	GCGGTTAAACGAGAGGCCCTAGTTAATAATACACGGCGTAAAGGGTGGTTAAGGAAAACATAACAATAAAGCCGAATGGCCCCTTGGCCGTCATACGCTTCTAGGAGTCCGAAGCCCTAATACGAAAGTAACTTTAATAAACCCACCTGACCCCACGAAAGCTGAGAAA	0	41	169	116	151	199	230	155	91	148	176	136	162	200	379	532	241	281	282	323	357	256	530	0	350	101	246	211	231	769	9	461	238	318	1427	877	900	350
OTU_90	Chordata	Mammalia	Eulipotyphla	Erinaceidae	Erinaceus	Erinaceus europaeus	100	Midori2	GCGGTCATACGATTAACCCATGAGAATAGGAAATCGGCGTAAAGAGTGTTTAGGATATTAATGTAATGAAATTAAAAAATGACTTAGCTGTAAAAAGCTCATTTCATAAATAAAAACATCTACAAAAGTGATTTCATAGGATCTTATTACACGTGAGCTAAGACC	0	0	0	108	0	0	0	0	75	0	0	0	0	0	0	0	0	0	0	90	200	42	98	0	37	0	0	39	0	25	0	0	0	0	0	18	0	0
OTU_92	Chordata	Actinopteri	Cypriniformes	Cyprinidae	Carassius	Carassius auratus/gibelio	100	manual check	GCGGTTAGACGAGAGGCCCTAGTTGATATTACAACGGCGTAAAGGGTGGTTAAGGATAAATAAAAATAAAGTCAAATGGCCCCTTGGCCGTCATACGCTTCTAGGCGTCCGAAGCCCTAATACGAAAGTAACTTTAATGAACCCACCTGACCCCACGAAAGCTACGATA	0	0	5819	0	0	0	0	0	0	0	0	3735	0	0	0	3607	0	0	0	926	345	1069	2158	0	0	0	470	2431	2087	0	0	0	211	0	4102	479	0	1095
OTU_95	Chordata	Mammalia	Chiroptera	Vespertilionidae	Pipistrellus		96.429	Midori2	GCGGTCATACGATTAGGCCAAACTAATAGACAATCGGCGTAAAGTGTGTTTTAGAAAATTACTCCATTAATAAAGTCAAGCCTTAACTAGGCTGTAAAAAGCCTTAGTTATTGTAAGATACCCAACGAAAGTGACTTTAAAATTTCTGACTACACGACAGCTAAGACC	0	0	0	0	0	0	0	0	0	0	0	0	0	0	0	0	0	0	0	0	1216	812	0	0	0	0	0	0	0	1512	0	0	0	0	0	0	0	0
OTU_97	Chordata	Actinopteri	Gobiiformes	Gobiidae	Neogobius		96.988	Midori2	GCGGTGATACGAGAGGCCCAAGTTGACAAAACTCGGCGAAAAGCGTGGTTAGTGATATCACCTCCACTAAAGCCAAACACCTTCAAGGCTGTAATACGCCCCCGAAGACAGGAAGCCCAATCACGAAAGTAGCTTTAATTTTCCTGAAGCCACGAAATCTGGGAAA	0	12	0	66	47	38	48	617	321	395	23	406	243	27	297	258	43	260	0	0	0	0	0	0	0	0	0	0	0	0	0	0	0	0	0	93	0	0
OTU_98	Chordata	Mammalia	Carnivora	Felidae	Felis	Felis catus	99.401	Midori2	GCGGTCATACGATTAGCCCAAACTAATAGACCCACGGCGTAAAGCGTGTTACAGAGAAAAAAATATACTAAAGTTAAATTTTAACTAGGCCGTAGAAAGCTAGAGTTTACATAAAAATACAGCACGAAAGTAACTTTAACACCTCCGACTACACGACAGCTAAGACC	0	0	0	0	0	0	0	1689	0	0	0	0	0	0	0	0	0	0	0	0	0	0	0	0	0	0	0	0	0	0	0	0	0	0	0	0	0	0
OTU_99	Chordata	Actinopteri	Cypriniformes	Leuciscidae	Abramis		96.512	Midori2	GCGGTTAAACGAGAGGCCCTAGTTAATAATACACGGCGTAAAGGGTGGTTAAGGAAAGCAGCAATAAAGCCGAATGGCCCTTTGGCTGTCATACGCTTCTAGGTGTCCGAAGTTCAACATACGAAAGTAGCTTTAATAACGCCCACCTGACCCCACGAAAGCTGAGAAA	1440	964	1601	2179	591	2532	5377	1217	1361	888	1416	879	1030	1621	1723	2365	1065	1495	2957	2922	2840	3684	2143	0	2191	817	1916	3306	772	2898	0	2173	2253	2263	5195	5361	3801	3725
OTU_100	Chordata	Actinopteri	Cypriniformes	Leuciscidae	Leuciscus		96.512	Midori2	GCGGTTATACGAGAGGCCCAAGTTGATAGACATCGGCGTAAAGGGTGGTTAAGGAGAGCATAACAATAAAGCCGAATGGCCCTTTGGCTGTCATACGCTTCTAGGTGTCCGAAGCCCAATATACGAAAGTAGCTTTAATAAAGCCCACCTGACCCCACGAAAGCTGAGAAA	51	48	75	61	53	99	130	98	39	100	65	20	75	51	48	239	150	125	98	325	332	373	245	0	220	164	337	306	412	361	8	362	237	289	1171	1334	735	510
OTU_101	Chordata	Actinopteri	Cypriniformes	Leuciscidae	Chondrostoma	Chondrostoma nasus	99.394	Midori2	GCGGTTAAACGAGAGGCCCTAGTTAATAATACACGGCGTAGAGGGTGGTTAAGGAAAGCATAACAATAAAGCCGAATGGCCCTTTGGCTGTCATACGCTTCTAGGTGTCCGAAGCCCATTATACGAAAGTAGCTTTAACAAAGCCCACCTGACCCCACGAAAGCTACGATA	0	0	0	0	0	3054	0	1623	0	4524	6256	0	0	0	0	0	0	3	1	1	0	744	934	0	2695	4	0	0	1	6316	0	634	0	0	218	158	2	2
OTU_103	Chordata	Actinopteri	Perciformes	Percidae	Perca	Perca fluviatilis	98.75	Midori2	GCGGTTATACGAGAGGCCCAAGTTGATAGACATCGGCGTAAAGCGTGGTTAAGATTAAAGACAATACTAAAGCCGAACACCTTCAGAGCTGTTATACGCATCCGAAGGTAAGAAGTTCAACCACGAAAGTGGCTTTATAGCACCTGACCCCACGAAAGCTGAGAAA	147	218	326	299	169	264	296	275	164	258	147	123	192	182	200	395	275	253	326	549	619	594	458	44	436	229	419	413	331	454	64	402	356	373	770	900	577	603
OTU_104	Chordata	Actinopteri	Gobiiformes	Gobiidae	Neogobius		96.933	Midori2	GCGGTTATACGAGAGGCCCAAGTTGACAAAGATCGGCGTAAAGCGTGGTTAATGATAATTCCACTAAAGCCAAACACCTTCAAGGCTGTTATACGCCCCCGAAGACAGGAAGCCCAATCACGAAAGTAGCTTTAATTTTCATGAAGCCACGAAAGCTAGGAAA	0	0	0	0	0	0	0	0	0	200	0	0	0	0	0	0	0	112	0	181	1024	0	546	0	0	424	214	0	0	512	0	0	2081	329	330	438	0	0
OTU_105	Chordata	Actinopteri	Cypriniformes	Leuciscidae	Leuciscus	Leuciscus leuciscus	98.246	Midori2	GCGGTTAAACGAGGGGCCCTAGTTAATAATACACGGCGTAAAGGGTGGTTAAGGAAAGCACAATAATAAAGCCAAATGGCCCTTTGGCTGTCATACGCTTCTAGGTGTCCGAAGCCCAATATACGAAAGTAGCTTTAATAAGGCCCACCTGACCCCACGAAAGCTGAGGAA	65	15	242	2591	3085	7283	423	1928	133	196	317	118	53	192	263	399	95	168	79	58	781	324	1236	0	364	324	767	325	1439	452	17	534	252	413	324	334	76	89
OTU_107	Chordata	Actinopteri	Cypriniformes	Leuciscidae	Leuciscus		96.512	Midori2	GCGGTTAAACGAGAGGCCCCAGTTAATAATACACGGCGTAAAGGGTTAAGGAAAGTATTAACAATAAAGCCGAATGGCCCTTTGGCTGTCATACGCTTCTAGGTGTCCGAAGCCCAATATACGAAAGTAGCTTTAATAAAGCCCACCTGACCCCACGAAAGCTGAGAAA	2220	1813	3148	3604	1011	4406	5390	1976	2092	1579	2031	1250	1715	3009	2600	4578	3906	3069	5706	6565	4918	6592	3943	0	3392	1617	3176	4886	1545	4392	310	4322	4446	4565	9092	15740	7091	6672
OTU_108	Chordata	Actinopteri	Cypriniformes	Leuciscidae	Squalius	Squalius cephalus	97.076	Midori2	GCGGTTAAACGAGAGGCCCCAGTTAATAATACACGGCGTAAAGGGTGGTTAAGGAAAACATAACAATAAAGCCGAATGGCCCTTTGGCTGTCATACGCTTCTAGGTGTCCGAAGCCTAATATATGAAAGTAGTTTTAATAAAGTCCACCTGACCCCACGAAAGCTGAGAAA	0	42	43	55	40	54	61	43	41	24	64	63	49	43	40	62	19	34	43	45	96	39	78	0	88	21	48	554	28	86	0	30	90	54	77	51	131	52
OTU_109	Chordata	Actinopteri	Gobiiformes	Gobiidae	Neogobius		96.988	Midori2	GCGGTTATACGAGAGGCCCAAGTTGACAAAAATCGGCGAAAAGCGTGGTTAGTGATATCACCTCCACTAAAGCCAAACACCTTCAAGGCTGTAATACGCCCCCGAAGACAGGAAATCACGAAAGTAGCTTTAATTTTCATGAAGCCACGAAAGCTAGGAAA	0	0	0	0	0	0	0	0	0	0	0	0	0	0	0	0	0	0	0	0	0	0	0	3	0	0	3	0	0	0	0	0	0	0	0	560	0	0
OTU_110	Chordata	Aves	Passeriformes	Sylviidae	Sylvia	Sylvia borin	100	Midori2	GCGGTCAGACAGGAGACCCAAATCAACATTATAACGGCGTAAAGCGTGGTTCTATGTTATCCAAGTAGCTAAGATTAAAAGACATCTGAGTTGTTATAAGCCAAAGATGTCCATAAGGCCACTATTCAAAGAAAATCTTAGACCAACGATTAATTGAAACCCACGAAAGCCAGGGCC	0	0	0	0	0	0	0	0	0	0	0	0	0	0	0	0	0	0	0	0	0	152	0	0	0	0	0	0	0	0	0	0	0	0	0	0	0	0
OTU_111	Chordata	Actinopteri	Gobiiformes	Gobiidae	Neogobius		96.988	Midori2	GCGGTTATACGAGAGGCCCAAGTTGACAAAAACCGCGAAAAGCGTGGTTGATATCACCTCCACTAAAGCCAAACACCTTCAAGGCTGTAATACGCCCCCGAAGACAGGAAGCCCAATCACGAAAGTAGCTTTAATTTTCATGAAGCCACGAAAGCTAGGAAA	4	0	4	1	0	0	1	0	0	2	0	0	0	0	0	0	1	0	0	1	0	0	4	0	27	1	52	14	119	25	0	25	12	669	3	170	389	0
OTU_112	Chordata	Actinopteri	Gobiiformes	Gobiidae	Neogobius		96.988	Midori2	GCGGTTATACGAGAGGCCCAAGTTGACAAAAATCGGCGAAAAGCGTGGTTAGTGATATCACCTCCACTAAAGCCAAACACCTTCAAGGCTGTTATACGCCCCCGAAGACAGGAAGACCCATCACGAAAGTAGCTTTAATCTTCATGAACCCACGAAAGCTAGGAAA	0	0	0	0	0	0	0	0	0	115	0	0	0	0	0	0	0	66	0	148	1022	0	348	0	0	309	149	0	73	343	0	0	1574	237	283	288	0	0
OTU_113	Chordata	Actinopteri	Cypriniformes	Cyprinidae	Capoeta		96.471	Midori2	GCGGTTAGACGAGAGGCCCTAGTTGATATTACAACGGCGTAAAGGGTGGTTAAGGATAAACAAAAATAAAGTCAAATGGCCCCTTGGCCGTCATACGCTTCTAGGAGTCCGAGGCCCTATATACGAAAGTAGCTTTAATTAACCCGCCTGACCCCACGAAAACTGAGAAA	0	120	130	135	92	169	76	86	46	40	185	61	243	72	135	292	198	126	198	237	677	271	353	34	223	70	117	135	73	519	33	159	118	159	298	163	380	79
OTU_114	Chordata	Actinopteri	Gobiiformes	Gobiidae	Neogobius	Neogobius melanostomus	98.78	Midori2	GCGGTATACGAGAGGCCCAAGTTGACAAAAATCGGCGAAAAGCGTGGTTAGTGATATCACCTCCACTAAAGCCAAACACCTTCAAGGCTGTAATACGCCCCCGAAGACAGGAAGCCCAATCACGAAAGTAGCTTTAATTTTCATGAAGCCACGAAAGCTACGATA	331	852	1149	1070	584	908	930	1260	582	1531	579	340	706	668	743	1129	949	1094	1099	3385	4737	4391	2783	188	2339	1507	4319	3675	3951	3438	218	4202	3204	2911	4855	6623	4742	3307
OTU_115	Chordata	Actinopteri	Cypriniformes	Gobionidae	Gobio		95.376	Midori2	GCGGTTAAACGAGAGGCCCTAGTTGATTTTATCACGGCGTAAAGGGTGGTTAAGGAAGACAAAACAATAAAGCCGAATGGCCCTTTGGCTGTCATACGCTTCTAGGTGTCCGAAGTTCAACATACGAAAGTAGCTTTAATAACGCCCACCTGACCCCACGAAAGCTGAGAAA	0	0	0	0	116	0	0	0	0	98	97	0	0	136	0	0	0	239	160	0	0	0	0	0	0	0	0	0	0	34	0	0	0	0	0	0	0	0
OTU_116	Chordata	Actinopteri	Cypriniformes	Leuciscidae	Rutilus	Rutilus rutilus	97.661	Midori2	GCGGTTAAACGAGAGGCCCTAGTTAATAATACATGCGCAAAGGGTGGTTAAGGGAATCACAATAATAAAGCCAAATGGCCCTTTGGCTGTCATACGCTTCTAGGTGTCCGAAGCCCAATATACGAAAGTAGCTTTAATAAAGCCCACCTGACCCCACGAAAGCTGAGAAA	5	3	17	5	10	13	17	5	9	16	17	10	92	31	104	40	19	19	13	235	5	192	18	0	26	24	21	402	28	16	11	387	22	1131	186	252	270	13
OTU_117	Chordata	Actinopteri	Perciformes	Percidae	Sander		96.364	Midori2	GCGGTTATACGAGAGGCCCAAGTTGACAAAAATCGGCGAAAAGCGTGGTTAAGACAAAAACAAAACTAAAGCCGAACACCTTCAGAGCTGTTATACGCACCCGAAGGTAAGAAGTTCAACCACGAAAGTGGCTTTATAGCCCCTGAACCCACGAAAGCTACGATA	5	7	14	20	3	21	19	15	2	18	12	5	7	13	17	11	9	15	28	80	103	143	76	0	53	33	144	95	42	118	0	136	139	123	133	319	209	98
OTU_118	Chordata	Actinopteri	Perciformes	Percidae	Perca	Perca fluviatilis	99.375	Midori2	GCGGTATACGAGAGGCCCAAGTTGATAGACATCGGCGTAAAGCGTGGTTAAGATTAAAGACAATACTAAAGCCGAACACCTTCAGAGCTGTTATACGCATCCGAAGGTAAGAAGTTCAACCACGAAAGTGGCTTTATAGCCCCTGAACCCACGAAAGCTGAGAAA	203	345	525	502	317	540	556	501	282	448	293	200	386	290	346	787	462	496	647	3409	3395	3639	2327	95	1538	474	2415	2281	1385	2742	130	2294	2060	1874	4522	5968	3144	2732
OTU_119	Chordata	Actinopteri	Cypriniformes	Leuciscidae	Leuciscus		97.59	Midori2	GCGGTTAAACGAGAGGCCCCAGTTAATAATACACGGCGTAAAGGGTGGTTAAGGAAAGTATTAACAATAAAGCCAAATGGCCCTTTGGCTGTCATACGCTTCTAGGTGTCCGAAGCCCAATATACGAAAGTAGCTTTAATAAAGCCCACCTGACCCCACGAAAGCTACGATA	107	130	363	277	100	347	492	194	207	238	132	152	161	319	286	354	219	355	470	1495	720	1087	822	0	506	253	622	938	445	713	46	791	964	890	1033	1726	1127	723
OTU_120	Chordata	Actinopteri	Gobiiformes	Gobiidae	Neogobius	Neogobius melanostomus	98.16	Midori2	GAGTTATACGAGAGGCCCAAGTTGACAAAAATCGGCGAAAAGCGTGGTTAGTGATATCACCTCCACTAAAGCCAAACACCTTCAAGGCTGTAATACGCCCCCGAAGACAGGAAGCCCAATCAAAAGTAGCTTTAATTTTCATGAAGCCACGAAAGCTAGAAAA	0	0	2	0	0	0	0	0	0	0	0	0	0	0	0	0	1	1	0	2	718	409	0	0	1659	0	240	4	471	786	0	374	887	248	742	9	546	792
OTU_121	Chordata	Actinopteri	Perciformes	Percidae	Perca	Perca fluviatilis	98.193	Midori2	GCGGTATACGAGAGGCCCAAGTTGATAGACATCGGCGTAAAGCGTGGTTAAGATTAAAGACAATACTAAAGCCGAACACCTTCAGAGCTGTTATACGCATCCGAAGGTAAGAAGTTCAACCACGAAAGTGGCTTTATTACCCCTGAACCCACGAAAGCTACGATA	61	114	399	671	291	471	463	639	148	926	331	94	403	354	343	211	391	779	703	2471	3384	4943	3089	0	1701	1192	4108	2965	2528	3386	90	4257	4108	4260	4970	8659	8001	2708
OTU_122	Chordata	Actinopteri	Cypriniformes	Leuciscidae	Squalius	Squalius cephalus	97.076	Midori2	GCGGTTAAACGAGAGGCCCTAGTTAATAATACACGGCGTAGTGTGGTTAAGGAAAACATAACAATAAAGCCGAATGGCCCTTTGGCTGTCATACGCTTCTAGGTGTCCGAAGCCCAATATACGAAAGTAGCTTTAATAAAGTCCACCTGGCCCCACGAAAGCTGAGAAA	0	398	220	283	1066	346	236	336	320	253	220	319	231	360	855	437	143	344	342	558	158	308	228	0	177	557	93	101	210	202	0	106	89	120	176	120	256	156
OTU_123	Chordata	Actinopteri	Cypriniformes	Leuciscidae	Rutilus	Rutilus rutilus	97.661	Midori2	GCGGTTAAACGAGAGGCCCCAGTTAATAATACACGGCGTAAAGGGTGGTTAAGGGAAGCACAATAATAAAGCCAAATGGCCCTTTGGCTATACGCTTCTAGGTGTCCGAAGCCCAATATACGAAAGTAGCTTTAATAAAGCCCACCTGACCCCACGAAAGCTGAGAAA	0	11	19	14	4	22	33	18	14	15	9	15	18	36	15	36	18	24	38	120	115	165	59	0	24	22	36	84	23	96	59	75	383	77	51	56	37	46
OTU_125	Chordata	Actinopteri	Cypriniformes	Leuciscidae	Squalius		96.491	Midori2	GCGGTTAAACGAGAGGCCCTAGTTAATAATACACGGCGTAAAGGGTGGTTAAGGAAAACATAACAATAAAGCCAAATGGCCCTTTTGCTGTCATACGCTTCTAGGTGTCCGAAGCCCAATATACGAAAGTAGCTTTAATATTCCACCTGACCCCACGAAAGCTGAGAAA	0	10	7	5	1	7	6	7	1	5	1	6	2	9	2	12	2	9	9	5	8	4	1060	0	6	3	2	5	174	109	0	10	3	8	53	12	10	3
OTU_126	Chordata	Actinopteri	Cypriniformes	Leuciscidae	Rutilus	Rutilus rutilus	97.661	Midori2	GCGGTTAAACGAGAGGCCCCAGTTAATAATACACGGCGTAAAGGGTGGTTAAGGGGAGCACAATAATAAAGCCAAATGGCCCTTTGGCTGTCATACGCTTCTAGGTGTCCGAAGCCCAATATACGAAAGTAGCTAATAAAGCCCACCTGACCCCACGAAAGCTGAGAAA	1091	5	66	13	174	325	126	753	82	12	19	261	233	890	581	141	84	621	86	282	329	417	243	0	392	84	363	117	165	270	4	762	2128	419	106	475	234	294
OTU_129	Chordata	Actinopteri	Perciformes	Percidae	Perca		96.988	Midori2	GCGGTTATACGAGAGGCCCAAGTTGATAGACATCGGCGTAAAGCGTGGTTAAGATTAAATACTAAAGCCGAACACCTTCAGAGCTGTTATACGCATCCGAAGGTAAGAAGTTCAACCACGAAAGTGGCTTTATAGCCCCTGAACCCACGAAAGCTACGATA	0	0	0	0	0	0	0	0	0	0	0	0	0	0	0	0	1	0	0	0	0	1	1119	0	3	0	7	0	12	1	0	4	5	230	6	17	11	7
OTU_130	Chordata	Aves	Podicipediformes	Podicipedidae	Podiceps	Podiceps cristatus	100	Midori2	GCGGTCACACAAGAGACCCAAATTAACCGTACACGGCGTAAAGAGTGGTACTATATTATCAAACTAGCTAAGATGAAAGCATAGCTGAGCTGTCATAAGCCTAAGCTACACCTAACTCTCTTCCCGATCCTAGCATTAATGATTGACCACACCCCCACGAAAGCTAAGACA	0	0	0	0	0	0	0	0	0	0	0	0	0	0	0	0	0	0	0	0	0	0	0	0	0	0	0	0	0	0	0	0	0	0	0	0	0	852
OTU_134	Chordata	Actinopteri	Gobiiformes	Gobiidae	Neogobius	Neogobius melanostomus	98.193	Midori2	GCGGTTATACGAGAGGCCCAATTTGACAAAATCGCGAAAAGCGTGGTTAGTGATATCACCTCCACTAAAGCCAAACACCTTCAAGGCTGTAATACGCCCCCGAAGACAGGAAGCCCAATCACGAAAGTAGCTTTAATTTTCATGAAGCCACGAAAGCTAGGAAA	0	0	0	0	0	2	1	1	2	1	0	1	0	2	2	0	3	0	1	0	29	17	102	0	62	0	11	41	0	399	0	592	42	10	19	39	25	5
OTU_135	Chordata	Actinopteri	Gobiiformes	Gobiidae	Pomatoschistus		96.386	Midori2	GCGGTTATACGAGAGGCCCAAGTTGATAGATGCCGGCGTAAAATGTGGTTAATTTATAGTATTGCACTAAAGCAAAACACCTTCTAAGCTGTTATATGCTCTCGAAGATAGGAGGCCCTTTTACGAAAGTAGCTTTAAATGATATGACCCCACGAAAGCTAGGGAA	0	0	0	0	0	0	0	0	0	0	0	0	0	0	0	0	0	0	0	0	1938	0	0	0	0	0	0	0	0	0	0	0	0	0	0	0	0	0
OTU_137	Chordata	Actinopteri	Cypriniformes	Leuciscidae	Alburnus	Alburnus alburnus	98.235	Midori2	GCGGTTAAACGAGAGGCCCCAGTTAATAATACGCGGCGTAAAGGGTGGTTAAGGAAAGCACAACAATAAAGCCGAATGGCCCTTTGGCTGTCATACGCTTCTAGGTGTCCGAAGCCCAATATACGAAAGTAGCTTTAATAAGGCCCACCTGACCCCACGAAAGCTGAGGAG	0	191	0	2814	16	12	0	105	253	0	174	210	53	0	91	1	0	125	0	187	70	102	0	0	272	0	94	156	95	0	0	0	0	0	0	0	0	42
OTU_138	Chordata	Actinopteri	Cypriniformes	Tincidae	Tinca		95.977	Midori2	GCGGTTAAACGAGAGGCCCCAGTTAATAATACACGGCGTAAAGGGTGGTTAAGGAAAGTATTAACAATAAAGCCAAATGGCCCCTTGGCCGTCATACGCTTCTAGGTGCCCGAAGCCCAACCACACGAAAGTAGCTTTAACAAAGCCCACCTGACCCCACGAAAGCTGAGAAA	0	0	0	0	0	0	0	0	0	0	0	0	0	0	0	0	0	0	0	0	188	52	55	0	161	84	72	128	33	103	0	44	0	414	143	224	57	0
OTU_140	Chordata	Actinopteri					97.041	Midori2	GCGGTTAAACGAGAGGCCCCAGTTAATAATACACGGCGTAAAGGGTGGTTAAGGATAAATAAAAATAAAGTCAAATGGCCCCTTGGCCGTCATACGCTTCTAGGCGTCCGAAGCCCTAATACGAAAGTAACTTTAATGAACCCACCTGACCCCACGAAAGCTGAGGAA	0	0	71	0	0	12	0	0	0	0	0	0	0	0	0	63	0	0	0	38	0	52	57	0	23	0	22	107	45	2	0	0	0	0	202	43	0	51
OTU_141	Chordata	Actinopteri	Cypriniformes	Leuciscidae	Alburnus	Alburnus alburnus	97.661	Midori2	GCGGTTAAACGGGCCCTAGTTAATAATACGCGGCGTAAAGGGTGGTTAAGGAAAGCATAACAATAAAGCCGAATGGCCCTTTGGCTTCATACGCTTCTAGGTGTCCGAAGCCCAATATACGAAAGTAGCTTTAATAAGGCCCACCTGACCCCACGAAAGCTGAGGAA	0	0	0	0	0	0	0	0	0	0	0	0	0	0	0	0	0	0	0	504	0	0	0	0	0	0	0	7	0	0	0	0	0	0	0	0	0	0
OTU_142	Chordata	Actinopteri	Cypriniformes	Leuciscidae	Squalius	Squalius cephalus	97.059	Midori2	GCTGTTAAACGAGAGGCCCTAGTTAATAATACACGGCGTAAAGTGTGGTTAAGGAAAACATAACAATAAAGCCGAATGGCCCTTTGGCTGTCATACGCTTCTAGGTGTCCGAAGCCCAATATACGAAAGTAGCTTTAATAAATTCCACCTGACCCCACGAAAGCTGAAAA	0	32	22	22	33	23	24	41	31	32	18	38	23	24	45	64	10	29	30	98	13	5	157	0	19	29	10	6	511	21	0	61	10	11	320	525	330	13
OTU_143	Chordata	Actinopteri	Gobiiformes	Gobiidae	Neogobius	Neogobius melanostomus	98.204	Midori2	GCGGTTATACGAGAGGCCCAAGTTGACAAAAATCGGCGAAAAGCGTGGTTAGTGATATCACCTCCACTAAAGCCAAAACACCTTCACGCTGTAATACGCCCCCGAAGACAGGAAGCCCAATCACGAAAGTAGCTTTAATTTTCATGAAGCCACGAAAGCTAGGAAA	0	2	1	2	0	3	2	2	3	0	5	4	4	0	0	3	0	0	2	582	650	348	240	4	135	178	393	155	33	1083	6	63	563	592	502	327	98	63
OTU_144	Chordata	Actinopteri	Gobiiformes	Gobiidae	Neogobius		96.988	Midori2	GCGGTTATACATTGCCCAAGTTGACAAAAATCGGCGAAAAGCGTGGTTAGTGATATCACCTCCACTAAAGCCAAACACCTTCAAGGCTGTAATACGCCCCCGAAGACAGGAAGCCCAATCACGAAAGTAGCTTTAATTTTCATGAAGCCACGAAAGCTAGGAAA	7	5	6	5	2	6	5	0	4	4	7	23	3	2	0	1	3	4	2	11	7	3	16	8	3	8	47	13	24	3	6	407	3	6	20	13	9	4
OTU_147	Chordata	Mammalia	Rodentia	Cricetidae	Microtus		96.951	Midori2	GCGGTCATACGATTAACCCAAACTAATTATTCTCGGCGTAAAACGTGTTACTACTATGCAAAATAGAATTAAAATCCATCCAATATGTAAAAATTCATCGCTGGACCTAAAACCAATGACGAAAGTAATTCTAATAAGCCTGATACACGATAGCTAAGGTA	0	0	0	0	0	0	0	0	0	0	0	0	0	0	0	0	0	0	0	0	0	0	0	0	0	0	0	0	0	0	0	0	19	971	0	0	0	3
OTU_148	Chordata	Mammalia	Primates	Hominidae	Homo	Homo sapiens	97.006	Midori2	GCGGTTATACGAGAGGCCCAAGTCAATAGAAGCCGGCGTAAAGAGTGTTTTAGATCACCCCCTCCCCAATAAAGCTAAAACTCACCTGAGTTGTAAAAAACTCCAGTTGACACAAAATAGACTACGAAAGTGGCTTTAACATATCTGAACACACAATAGCTAAGACC	9	215	190	0	3	11	17	17	0	5	1	0	2	0	7	0	21	0	97	0	66	17	0	0	0	0	1	0	0	0	0	10	0	81	0	0	0	7
OTU_149	Chordata	Mammalia	Chiroptera	Vespertilionidae	Myotis	Myotis daubentonii	100	Midori2	GCGGTCATACGATTAGGCCAAACTAATAGACACTCGGCGTAAAGCGTGTTTTAGAAAATAAATAATAAATAAAATTAAACTTTATCTAAGCTGTAAAAAGCCTCAGCTATTGTAAAATACACAACGAAAGTAATTTTAAAAAATCTGATTACACGATAGCTAAGATC	0	0	0	0	0	0	0	0	0	0	0	0	0	0	0	0	0	0	0	0	75	77	0	0	0	0	0	0	0	0	0	0	0	0	0	39	145	0
OTU_150	Chordata	Aves	Passeriformes	Turdidae	Turdus	Turdus merula	97.191	Midori2	GCGGTCATACAGGCTCAAATTAACTTTATAACGGCGTAAAGAGTGGTCGCATGTTATCCATTAGCTAAGATTAAAAAGCAACTGAGCTGTCATAAGCCCAAGATGCTCATAAGGCCTCCGTCTTCAAAGAAGATCTTAGAACAACGATCAATTGAATCCACGAAAGCCAGGACC	0	0	0	7	0	0	0	0	0	0	0	0	0	0	0	0	0	0	0	0	0	0	1240	0	0	0	0	0	0	0	0	0	0	0	0	0	0	0
OTU_151	Chordata	Actinopteri	Gobiiformes	Gobiidae	Neogobius		96.988	Midori2	GCGGTTATACGAGAGGCCCAAGTTGACAAAAATCGGCGAAAAGCGTGGTTAGTGATATCACCTCCACTAAAGCCAAACACCTTCTGTAATACGCCCCCGAAGACAGGAAGCCCAATCACGAAAGTAGCTTTAATTTTCATGAAGCCACGAAAGCTAGGAAA	0	0	0	0	0	0	0	0	0	0	0	0	0	0	0	0	0	0	0	0	0	0	0	0	0	0	475	0	0	0	0	0	0	320	0	2	0	0
OTU_153	Chordata	Actinopteri	Gobiiformes	Gobiidae	Neogobius		96.951	Midori2	GGTTATACGAGAGGCCCAAGTTGACAAAAATCGGAAAAAGCGTGGTTAGTGATATCACCTCCACTAAAGCCAAACACCTTCAAGGCTGTAATACGCCCCCGAAGACAGGAAGCCCAATCACGAATTAGCTTTAATTTTCATTAAGCCACGAAAGCTAGGAAA	5	1	0	0	0	0	1	3	0	1	2	1	0	0	0	1	2	1	2	0	0	0	0	0	0	0	0	0	0	0	4	0	0	14	0	2	0	0
OTU_155	Chordata	Actinopteri	Cypriniformes	Leuciscidae	Rutilus	Rutilus rutilus	97.661	Midori2	GCGGTTAAACGAGAGGCCCCAGTTAATACACGGCGTAAAGGGTGGTTAAGGGAAGCACAATAATAAAGCCAAATGGCCCTTTGGCTGTCATACGCTTCTAGGTGTCCGAAGCCCAATATACGAAAGTAGCTTTAATAAAGCCCACCTGACCCCACGAAAGCTGAGAAA	1269	1315	3509	1925	839	2192	2854	1167	1993	2188	1082	931	1583	2522	1894	2997	1735	2578	3795	7408	3220	4151	2315	1242	2359	1501	2401	3346	2104	3150	1528	3895	3012	4136	3850	4950	4532	3944
OTU_156	Chordata	Actinopteri	Cypriniformes	Leuciscidae	Rutilus	Rutilus rutilus	97.661	Midori2	GCGGTTAAACGAGAGGCCCTAGTTAATAATACACGGCGTAAAGGGTGGTTAAGGAAAGCATAATAATAAAGCCAAATGGCCCTTTGGCTGTCATACGCTTCTAGGTGTCCGAAGCCCAATATACGAAAGTAGCTTAAAAAGCCCACCTGACCCCACGAAAGCCGAGAAA	0	0	0	4	0	4	8	2705	4	3	1	0	0	2	4	8	0	0	0	4	4	0	6	0	6	81	0	1	7	0	0	4	4	9	15	3737	2	233
OTU_157	Chordata	Actinopteri	Gobiiformes	Gobiidae	Neogobius	Neogobius melanostomus	98.137	Midori2	GCGGTTATACGATAGGCCCAAGTTGACAAAAATCGGCGAAAAGCGTGGTTAGTGATATCACCTCCACTAAAGCCAAACACCTTCAAGGCTGTAATACCCCCCGAAGACAGGAAGCCCAATCACGAAATTAGCTTTAATTTTCATGAAGCCACGAAAGCTAAAA	0	1	1	0	2	1	0	3	1	0	1	0	0	0	2	0	0	0	0	0	0	1	0	0	8	0	4	5	0	3	0	0	487	2	4	0	0	2
OTU_160	Chordata	Actinopteri	Cypriniformes	Leuciscidae			93.605	Midori2	GCGGTTAAACGAGAGGCCCCAGTTAATAATACACGGCGTAAAGGGTGGTTAAGGAAAGTATTAACAATAAAGTCAAATGGCCCCTTGGCCGTCATACGCTTCTAGGAGTCCGAAGCCCTAATACGAAAGTAACTTTAATAAACCCACCTGACCCCACGAAAGCTAGGAAA	0	86	267	391	237	437	451	201	164	164	273	351	313	261	410	466	419	394	595	775	909	1044	1097	99	610	105	498	385	254	997	44	739	561	501	1121	1216	912	587
OTU_161	Chordata	Actinopteri	Gobiiformes	Gobiidae	Neogobius	Neogobius melanostomus	97.516	Midori2	GCGGTTATACGAGAGGCCCAAGTTGACAAAAATCGGCGAAAAGCGTGGTTATATCACCTCCACTAAAGCCAAACACCTTCAAGGCTGTAATACGCCCCCGAAGACAGGAAGCCCAATCACGAAAGTAGCTTTAATTTTCATGAAGCCACGAAAGCTAAAA	0	0	0	0	0	0	0	0	0	0	0	0	0	0	0	0	0	0	0	11	7	0	0	0	11	0	229	58	0	6	0	10	342	7	3	9	8	0
OTU_163	Chordata	Mammalia	Artiodactyla	Bovidae			96.951	Midori2	GCGGTCATACGATTAACCCAAGCTAACAGGCTGCGTAAAACGTGTTAAAGCACCATACCAAATAGGGTTAAATTCTAACTAAGCTGTAAAAAGCCATGATTAAAATAAAAATAAATGACGAAAGTGACCCTACAATAGCCGACGCACTATAGCTAAGACC	0	0	0	0	0	0	0	0	0	0	0	0	0	0	0	0	0	0	0	0	9	0	0	0	0	0	0	0	0	0	0	0	0	0	0	0	0	0
OTU_166	Chordata	Actinopteri	Gobiiformes	Gobiidae	Neogobius		96.988	Midori2	GCGGTTATACGAGAGGCCCAAGTTGACAAAAATCGAAAAGCGTGGTTAGTGATATCACCTCCACTAAAGCCAAACACCTTCAAGCTGTAATACGCCCCCGAAGACAGGAAGCCCAATCACGAAAGTAGCCTTAATTTTCATGAAGCCACGAAAGCTAGGAAA	5	13	8	0	9	6	3	8	6	6	6	7	6	2	3	10	7	1	7	28	37	14	22	4	26	15	35	44	18	19	3	309	19	32	7	26	14	43
OTU_170	Chordata	Actinopteri	Cypriniformes	Leuciscidae	Squalius	Squalius cephalus	98.246	Midori2	GCGGTAGACGAGAGGCCCTAGTTAATAATACACGGCGTAAAGGGTGGTTAAGGAAAACATAACAATAAAGCCGAATGGCCCTTTGGCTGTCATACGCTTCTAGGTGTCCGAAGCCCAATATACGAAAGTAGCTTTAATAAAGTCCACCTGACCCCACGAAAGCTGAGAAA	26891	55271	39311	48371	67999	53566	44655	66204	52829	48359	34792	62274	43683	65483	61405	80195	27518	56841	43748	22290	27709	9144	42122	19685	30537	31797	19349	13023	16463	40723	0	21637	12463	24099	33133	23955	42476	21742
OTU_171	Chordata	Actinopteri	Cypriniformes	Tincidae	Tinca		96.532	Midori2	GCGGTTAAACGAGAGGCCCTAGTTAATAATACACGGCGTAAAGGGTGGTTAAGGGAAGCACAATAATAAAGCCAAATGGCCCCTTGGCCGTCATACGCTTCTAGGTGCCCGAAGCCCAACCACACGAAAGTAGCTTTAACAAAGCCCACCTGACCCCACGAAAGCTGAGAAA	0	0	0	0	0	0	0	0	0	0	0	0	0	0	0	0	0	0	0	0	65	11	20	0	71	25	15	46	33	46	0	43	0	254	125	131	42	0
OTU_175	Chordata	Actinopteri	Perciformes	Percidae	Perca		96.988	Midori2	GCGGTTATACGAGAGGCCCAAGTTGATAGACATCGGCGTAAAGCGTGGTTAAGATTAATACAATACTAAAGCCGAACACCTTCAGAGCTGTTATACGCATCCGAAGGTAAGAAGTTCAACCACGAAAGTGGCTTTACCCCCCTGAACCCACGAAAGCTACGATA	0	0	0	0	0	0	0	0	0	0	0	0	0	0	0	0	0	0	0	0	0	0	0	0	11	0	24	324	5	7	0	283	0	0	7	296	10	1
OTU_176	Chordata	Mammalia	Rodentia	Cricetidae	Microtus	Microtus arvalis	97.5	Midori2	GCTCATACGATTAACCCAAACTAATTATTCTCGGCGTAAAACGTGTTACTAGAAATATGCAAAATAGAAAATCCATCCAATATGTGAAAATTCATCGCTGGACCTAAAACCAATGACGAAAGTAATTCTAATAAGCCTGATACACGATAGCTAAGGTA	0	0	0	0	0	0	0	0	0	0	0	0	0	0	0	0	0	0	0	0	0	0	0	0	0	0	0	0	0	0	0	0	560	0	0	0	0	0
OTU_177	Chordata	Actinopteri	Perciformes	Percidae	Perca		96.988	Midori2	GCGGTTATACGAGAGGCCCAAGTTGATAGACATCGGCGTAAAGCGTGGTTAAGATTAAAGACAATACTAAAGCCGAACACCCCCAAAGCTGTTATACGCATCCGGAGGTGAGAAGTTCAACCACGAAAGTGGCTTTATAGCCCCTGAACCCACGAAAGCTACGATA	0	6	2	3	2	0	2	3	1	0	3	4	0	0	0	3	5	1	0	47	112	70	62	2	34	10	62	99	43	68	3	56	23	25	130	155	69	26
OTU_178	Chordata	Actinopteri	Cypriniformes	Leuciscidae	Squalius	Squalius cephalus	97.076	Midori2	GCGGTTATACGAGAGGCCCTAGTTAATAATACACCGTAAAGGTTGGTTAAGGAAAACATAACAATAAAGCCGAATGGCCCTTTGGCTGTCATACGCTTCTAGGTGTCCGAAGCCCAATATACGAAAGTAGCTTTAATAAAGTCCACCTGACCCCACGAAAGCTGAGAAA	0	38	9	4	9	14	5	20	18	14	2	10	8	8	56	21	2	7	10	133	58	15	19	0	19	21	14	393	9	23	0	19	9	17	26	13	86	13
OTU_179	Chordata	Actinopteri	Cypriniformes	Leuciscidae	Vimba/Blicca	Vimba vimba / Blicca bjeorkna	98.246	manual check	GCGGTTAAACGAGAGGCCCCAGTTAATAATACACGGCGTAAAGGGTGGTTAAGGAAAGTATAACGATAAAGCCGAATGGCCCTTTGGCTGTCATACGCTTCTAGGTGTCCGAAGTCCAATATACGAAAGTAACTTTAATAAACCCACCTGACCCCACGAAAGCTGAGAAA	0	44	173	132	111	215	173	124	97	40	116	162	139	128	84	229	218	176	246	250	233	278	269	0	244	53	141	103	75	414	21	218	150	115	347	334	226	163
OTU_182	Chordata	Actinopteri	Perciformes	Percidae	Perca	Perca fluviatilis	97.59	Midori2	GCGGTTATACGAGAGGCCCAAGTTGACACATCGCGTAAAGCGTGGTTAAGATTAAAGACAATACTAAAGCCGAACACCTTCAGAGCTGTTATACGCATCCGAAGGTAAGAAGTTCAACCACGAAAGTGGCTTTATAGCCCCTGAACCCACGAAAGCTACGATA	0	0	1	0	0	0	0	0	0	0	0	1	0	0	0	0	0	0	0	4	0	8	5	0	17	0	15	25	98	117	2	15	8	5	7	585	8	29
OTU_183	Chordata	Actinopteri	Gobiiformes	Gobiidae	Neogobius		96.386	Midori2	GCGGTTATACGAGAGGCCCAAGTTGACAAAAATCGGCGAAAAGCGTGGTTAGTGATATCACCTCCACTAAAGCCAAACACCTTCAAGGCTGTAATACGCCCCCGAAGACAGGAAGCCCAATCACGAAAGTAGCTTTAATTTTCATGAATAGCAAGCTAGGAAA	0	0	0	0	0	0	0	0	0	0	0	1	1	0	0	0	3	1	0	0	0	0	0	2	0	2	0	0	0	2	0	0	0	0	0	3	0	0
OTU_184	Chordata	Actinopteri	Gobiiformes	Gobiidae	Neogobius		96.988	Midori2	GCGGTTATACGAGAGGCCCAACTTGACAAAAATCGGCGAAAAGCGTGGTTAGTGATATCACCTCCACTAAAGCCAAACACCTTCAAGGCTGTAATACGCCCCCGAAGACAGGAAGCCCAATCACGAATAGCTTTAATTTTCATGAAGCCAAAAGCTAGGAAA	0	0	0	0	0	0	0	0	0	0	0	0	0	0	0	0	0	0	0	0	0	0	0	0	0	0	0	0	0	0	0	0	502	0	0	0	0	0
OTU_185	Chordata	Actinopteri	Cypriniformes	Leuciscidae	Leuciscus	Leuciscus aspius	98.246	Midori2	GCGGTTAAACGAGAGGCCCTAGTTAATAATACACGGCGTAAAGGGTGGTTAAGGAAAGCATAACAATAAAGGAATGGCCCCTTGGCTGTCATACGCTTCTAGGTGTCCGAAGCCCAATATACGAAAGTAGCTTTAATAAGGCCCACCTGACCCCACGAAGGCTGAGGAA	1	31	118	23	0	45	5	80	15	0	24	0	0	0	42	0	63	13	55	5	726	7	4	0	49	0	41	33	2	41	0	0	0	21	8	67	12	10
OTU_186	Chordata	Actinopteri	Cypriniformes	Leuciscidae	Rutilus	Rutilus rutilus	97.661	Midori2	GCGGTTATACGAGAGGCCCTAGTTAATAATACACGGCGTAAAGGGTGGTTAAGGGGAGCACAATAATAAAGCCAAATGGCCCTTTGGCTGTCATACGCTTCTAGGTGTCCGAAGCCCAATATAAAAGTAGCTTTAATAAAGCCCACCTGACCCCACGAAAGCTGAGAAA	633	11	66	32	109	308	163	431	91	64	71	205	136	539	520	237	98	372	53	150	142	162	205	0	289	123	308	589	785	193	3	661	964	429	400	427	228	228
OTU_187	Chordata	Mammalia	Rodentia	Cricetidae	Microtus		96.97	Midori2	GCGGTCATACGATTAACCCAAACTAATTATTCTCGGCGTAAAAACGTGTTACTAGAAATATGCAAAATAGAATTAAAATCCATCCAATATAAAAATTCATCGCTGGACCTAAAACCAATGACGAAAGTAATTCTAATAAGCCTATACACGATAGCTAAGGTA	0	0	0	0	0	0	0	0	0	0	0	0	0	0	0	0	0	0	0	0	0	0	0	0	0	0	0	0	0	0	0	0	448	0	0	0	0	0
OTU_189	Chordata	Actinopteri	Gobiiformes	Gobiidae	Neogobius	Neogobius melanostomus	98.802	Midori2	GCGGTTATACGAGAGGCCCAAGTTGACAAAAAATCGGCGAAAGCGTGGTTAGTGATATCACCTCCACTAAAGCCAAACACCTTCAAGGCTGTAATACGCCCCCGAAGACAGGAAGCCCAATCACGAAAGTAGCTTTAATTTTCATGAAGCCACGAAAGCTAGGAAA	122	147	84	96	27	93	48	76	42	48	104	66	125	67	61	198	56	77	34	367	156	135	202	156	193	270	326	496	32	189	53	535	328	93	263	407	136	119
OTU_190	Chordata	Actinopteri	Cypriniformes				96.45	Midori2	GCGGTTAGACGAGAGGCCCTAGTTGATATTACAACGGCGTAAAGGGTGGTTAAGGATAAACAAAAATAAAGTCAAATGGCCCCTTGGCCGTCATACGCTTCTAGGAGTCCGAAGCCCTAATACGAAAGTAATAAACCCACCTGACCCCACGAAAGCTGAGAAA	0	0	0	0	0	0	0	0	0	0	0	0	0	0	0	0	0	0	0	0	0	0	0	0	0	0	0	0	0	0	0	0	0	0	5	0	0	0
OTU_193	Chordata	Actinopteri	Cypriniformes				96.45	Midori2	GCGGTTATACGAGAGGCCCTAGTTGATATTATAACGGCGTAAAGGGTGGTTAGGGATAAATAATAATAAAGCCAAATGGCCCCTTGGCCGTCATACGCTTCTAGGAGTCCGAAGCCCTAATACGAAAGTAACTTTAATAAACCCACCTGACCCCACGAAAGCTGAGAAA	0	134	139	180	71	197	79	82	65	43	190	53	293	87	165	270	200	137	206	191	744	289	325	0	200	87	110	125	77	463	36	178	132	141	204	143	349	70
OTU_195	Chordata	Actinopteri	Perciformes	Percidae	Sander		96.988	Midori2	GCGGTTATACGAGAGGCCCAAGTTGATAGACATCGGCGTAAAGCGTGGTTAAGATTAAAGACAAAACTAAAGCCGAACACCTTCAGAGCTGTTATACGCACCCGAAGGTAAGAAGTTCAACCACGAAAGTGGCTTTATTACCCCTGAACCCAAAAGCTACGATA	0	11	28	88	25	52	67	51	22	76	35	8	31	28	45	11	22	70	75	402	538	814	453	0	221	101	552	470	242	490	0	571	643	789	713	1316	1439	479
OTU_196	Chordata	Actinopteri	Cypriniformes	Leuciscidae	Leuciscus	Leuciscus leuciscus	97.076	Midori2	GCGGTTAAACGAGAGGCCCCAGTTAATAATACACGGCGTAAAGGGTTAAGGAAAGCACAATAATAAAGCCAAATGGCCCTTTGGCTGTCATACGCTTCTAGGTGTCCGAAGCCCAATATACGAAAGTAGCTTTAACAAAGCCCACCTGACCCCACGAAAGCTGAGAAA	0	21	287	236	172	539	949	93	221	271	250	111	70	189	322	381	109	206	100	158	477	288	1072	0	617	436	243	967	458	147	7	940	711	631	727	602	165	245
OTU_197	Chordata	Actinopteri	Perciformes				93.333	Midori2	GCGGTTATACGAGAGGCCCAAGTTGATAGACATCGGCGTAAAGCGTGGTTAAGACAAAAACAAAACTAAAGCCGAACACCCCCAAAGCTGTTATACGCATCCGGAGGTGAGAAGTTCAACCACGAAGGTGGCTTTATCTAACCTGAACCCACGAAAGCTACGATA	0	14	9	47	17	14	27	27	40	28	30	5	8	18	21	17	18	39	38	82	319	253	249	0	80	39	237	374	35	277	0	230	161	209	327	499	348	94
OTU_199	Chordata	Actinopteri	Perciformes	Percidae	Perca		96.988	Midori2	GCGGTTATACGAGAGGCCCAAGTTGATAGACATCGGCGTAAAGCGTGGTTAAGATTAAAGACAATACTAAAGCCGAACACCTTCAGAGCTATACGCATCCGAAGGTAAGAAGTTCAACCACGAAAGTGGCTTTATTACCCCTGAACCCACGAAAGCTACGATA	3	0	8	13	3	11	9	14	4	17	3	1	8	8	3	6	4	9	5	33	57	86	76	0	34	32	76	52	75	46	0	93	112	113	99	192	149	116
OTU_200	Chordata	Actinopteri	Perciformes	Percidae	Perca		96.988	Midori2	GCGGTGATACGAGAGGCCCAAGTTGATAGACCTCGGCGTAAAGCGTGGTTAAGATTAAAGACAATACTAAAGCCGAACACCTTCAGAGCTGTTATACGCATCCGAAGGTAAGAAGTTCAACCACGAAAGTGGCTTTATAGCCCTTGAACCCACGAAATCTGCGATA	51	56	80	52	65	50	42	239	81	270	40	71	113	36	88	177	58	111	70	0	0	0	0	0	0	0	56	0	58	0	0	0	0	0	51	0	72	46
OTU_201	Chordata	Actinopteri	Cypriniformes	Cyprinidae	Capoeta		95.322	Midori2	GCGGTTAGACGGCCCTAGTTGATATTATAACGGCGTAAAGGGTGGTTAGGGATAAATAATAATAAAGCCAAATGGCCCCTTGGCCGTCATACGCTTCTAGGTGTCCGAGGCCCTATATACGAAAGTAGCTTTAATAAAGCCCACCTGACCCCACGAAAGCTGAGAAA	0	331	223	276	93	296	182	116	111	86	209	47	260	160	167	427	247	184	260	444	1163	489	449	0	333	167	252	384	142	641	30	231	238	379	394	382	780	199
OTU_202	Chordata	Actinopteri	Cypriniformes	Leuciscidae	Leuciscus		96.491	Midori2	GCGGTTAAACGAGAGGCCCCAGTTAATAATACACGGCGTAAAGGGTGGTTAAGGACTATTAACAATAAAGCCGAATGGCCCTTTGGCTGTCATACGCTTCTAGGTGTCCGAAGCCCAATATACGAAAGTAGCTTTAATAAAGCCCACCTGACCCCACGAAAGCTGAGAAA	91	75	85	170	39	210	214	60	66	63	51	93	77	119	107	214	111	115	198	535	311	427	244	30	184	150	236	293	38	350	0	270	236	322	658	1061	685	417
OTU_203	Chordata	Actinopteri	Cypriniformes	Leuciscidae	Leuciscus	Leuciscus aspius	97.674	Midori2	GCGGTTAGACGAGAGGCCCTAGTTGATATTACAACGGCGTAAAGGGTGGTTAAGGAAAGCATAACAATAAAGTCGAATGGCCCCTTGGCTGTCATACGCTTCTAGGTGTCCGAAGCCCAATATACGAAAGTAGCTTTAATAAGGCCCACCTGACCCCACGAAAGCTGAGGAA	0	21	68	17	0	19	3	37	8	0	31	9	6	0	50	8	76	20	46	11	28	29	14	0	70	0	70	28	6	84	0	8	0	25	15	83	36	9
OTU_204	Chordata	Actinopteri	Gobiiformes	Gobiidae	Neogobius	Neogobius melanostomus	98.137	Midori2	GCGGTTATACGAGAGGCCCAAGTTGACAAAAATCGGCGAAAAGCGTGGTTAGTGATATCACCTCCACTAAAGCCAAACACCTTCAAGGCTGTAATACGCCCCCGAAGACAGGACCCCAATCACGAAGGTAGCTTTAATTTTCATGAAGCCACGAAAGCTAAAA	26	13	13	17	9	8	9	9	13	4	14	24	20	11	6	22	11	11	11	15	6	10	19	50	50	9	33	18	921	48	11	18	37	18	29	13	9	26
OTU_205	Chordata	Actinopteri	Cypriniformes	Leuciscidae	Leuciscus	Leuciscus leuciscus	98.246	Midori2	GCGGTTAAACGAGAGGCCCCAGTTAATAATACACGGCGTAAAGGGTGGTTAAGGAAAGCCAATAATAAAGCCAAATGGCCCTTTGCCTGTCATACGCTTCTAGGTGTCCGAAGCCCAATATACGAAAGTAGCTTTAATAAAGCCCACCTGACCCCACGAAAGCTGAGAAA	0	0	17	0	11	31	37	0	14	11	13	9	5	11	16	14	8	11	13	408	46	365	63	0	32	20	197	56	12	17	0	24	66	42	44	42	16	28
OTU_206	Chordata	Actinopteri	Perciformes	Percidae			93.976	Midori2	GCGGTTATACGAGAGGCCCAAGTTGATAGACATCGGCGTAAAGAGTGGTTAAGCTAAAATTAAAACTAAAGCCGAACACCCCCAAAGCTGTTATACGCATCCGAAGGTAAGAAGTTCAACCACGAAAGTGGCTTTATAGCCCCTGAACCCACGAAAGCTACGATA	0	0	0	3	3	0	2	8	1	7	2	0	0	0	0	2	0	4	0	19	59	51	23	0	14	3	45	56	19	44	0	21	13	11	51	88	25	16
OTU_207	Chordata	Actinopteri	Gobiiformes	Gobiidae	Ponticola		95.122	Midori2	GCGGTTATACGAGAGGCCCAAGTTGACAAAAATCGGCGAAAAGCGTGGTTAATAACTTATTTACTAAAGCCAAACACCTTTAAGGCTGTTATACGCCCCCAAAGGTAGGAAGACCCCTCACGAAAGTAGCTTTAATTTTCATGAAGCCACGAAAGCTAGGAAA	0	174	96	48	59	95	77	134	83	45	144	15	58	89	51	94	66	98	100	307	354	320	184	0	273	58	381	271	125	343	0	198	90	455	398	110	198	236
OTU_208	Chordata	Actinopteri	Cypriniformes	Leuciscidae	Leuciscus		95.152	Midori2	GCGGTTAAACGAGAGGCCCTAGTTAATAATACACGGCGTAAAGGGTGGTTAAGGAGAGCATAACAATAAAGCCGAATGGCCCTTTGGCTGTCATACGCTTCTAGGTGTCCGAAGCCCAATATACGAAAGTGGCTTTATAGCCCCTGAACCCACGAAAGCTACGATA	15	14	17	16	12	19	27	9	3	15	13	4	8	6	13	34	26	18	21	43	44	68	23	0	34	15	49	45	47	52	0	51	35	46	161	165	113	104
OTU_209	Chordata	Actinopteri	Cypriniformes	Leuciscidae	Rutilus	Rutilus rutilus	97.661	Midori2	GCGGTTATACGAGAGGCCCAAGTTAATAATACACGGCGTAAAGGGTGGTTAAGGGAAGCACAATAATAAAGCCAAATGGCCCTTTGGCTGTCATACTCTCCTAGGTGTCCGAAGCCCAATATACGAAAGTAGCTTTAATAAAGCCCACCTGACCCCACGAAAGCTGAGAAA	30	63	219	89	40	145	107	71	113	111	95	29	110	104	84	243	109	97	153	451	132	200	104	0	163	106	228	206	1788	261	53	350	270	328	334	313	416	205
OTU_210	Chordata	Actinopteri	Perciformes	Percidae	Sander		96.97	Midori2	GCGGTTATACGAGAGGCCCAAGTTAGACATCGGCGTAAAGCGTGGTTAAGACAAAAACAAAACTAAAGCCGAACACCTTCAGAGCTGTTATACGCACCCGAAGGTAAGAAGTTCAACCACGAAAGTGGCTTTATAGCCCCTGAACCCACGAAAGCTACGATA	0	2	6	9	6	12	6	17	4	14	9	1	4	5	9	1	10	9	8	35	45	90	38	0	30	21	95	77	39	72	0	125	95	75	90	192	212	62
OTU_211	Chordata	Actinopteri	Perciformes	Percidae	Sander		96.97	Midori2	GCGGTTATACGAGAGGCCCAAGTTGATAAACATCGGCGTAAAGCGTGGTTAAGACAAAAACAAAACTAAAGCCGAACACCTTCAGAGCTGTTATACGCACCCGAAGGTAAGAAGTTCACGAAAGTGGCTTTATTACCCCTGAACCCACGAAAGCTACGATA	0	4	21	21	17	13	15	17	6	16	13	11	13	14	22	2	16	20	10	19	13	21	24	0	26	18	325	15	9	14	0	19	29	34	17	21	377	19
OTU_212	Chordata	Actinopteri	Cypriniformes	Leuciscidae	Squalius	Squalius cephalus	98.83	Midori2	GCGGTTAAACGAGAGGCCCTAGTTAATAATACACGGCGTAAAGGGTGGTCAAGGGAAACATAACAATAAAGCCGAATGGCCCTTTGGCTGTCATACGCTTCTAGGTGTCCGAAGCCCAATATACGAAAGTAGCTTTAATAAAGTCCACCTGACCCCACGATAGCTGAGGAA	0	113	17	51	39	28	19	37	20	31	18	39	27	38	41	2760	12	34	53	10	10	7	597	0	21	25	5	532	9	36	0	10	11	1138	177	18	24	476
OTU_213	Chordata	Actinopteri	Cypriniformes	Leuciscidae	Leuciscus	Leuciscus leuciscus	97.076	Midori2	GCGGTTAAACGAGAGGCCCTAGTTAATAATACACGGCGTAAAGGGTGGTTAAGGAAAGCACAATAATAAAGCCAAATGGCCCTTTGGCTGTCATACGCTTCTAGGTGTCCGAAGCCCAATATACGAAAGTAGCTTTAATTGACCCGCCTGACCCCACGAAAACTGAGAAA	0	132	234	125	57	178	138	58	105	93	160	44	144	157	142	400	125	142	177	519	641	334	278	0	185	135	143	428	185	362	40	259	255	364	316	245	442	134
OTU_217	Chordata	Actinopteri	Cypriniformes	Leuciscidae	Alburnus	Alburnus alburnus	98.246	Midori2	GCGGTTAAACGAGGGGCCCTAGTTAATAATACGCGGCGTAAAGGTGGTTAAGGAAAGCATAACAATGAAGCCGAATGGCCCTTTGGCTGTCATACGCTTCTAGGTGTCCGAAGCCCAATATACGAAAGTAGCTTTAATAAGCCCCACCTGACCCCACGAAAGCTGAGGAA	0	0	0	0	0	0	0	0	0	0	0	0	0	0	0	0	0	0	0	0	0	0	0	0	944	0	0	0	1191	0	0	0	0	0	0	0	0	0
OTU_219	Chordata	Actinopteri	Perciformes	Percidae	Sander		96.97	Midori2	GCGGTTATACGAGAGGCCCAAGTTGATAGACAGCGTAAAGCGTGGTTAAGACAAAAACAAAACTAAAGCCGAACACCTTCAGAGCTGTTATACGCACCCGAAGGTAAGAAGTTCAACCACGAAAGTGGCTTTATAGCCCCTGAACCCACGAAAGCTACGATA	0	3	0	10	1	4	6	6	2	6	5	0	1	3	2	0	2	13	5	56	21	60	26	0	11	21	37	66	24	34	0	62	46	43	66	151	160	33
OTU_220	Chordata	Actinopteri	Gobiiformes	Gobiidae	Neogobius		96.988	Midori2	GCGGTTATACGAAGCCCAAGTTGACAAAAATCGGCGAAAAGCGTGGTTAGTGATATCACCTCCACTAAAGCCAAACACCTTCAAGGCTGTAATACGCCCCCGAAGACAGGAAGCCCAATCAAAAGTAGCTTTAATTTTCATGAAGCCACGAAAGCTAGGAAA	0	0	0	0	0	0	0	0	0	0	0	0	0	0	0	0	0	0	0	0	3	297	0	0	23	0	4	0	6	11	0	7	11	4	11	1	8	16
OTU_225	Chordata	Actinopteri	Cypriniformes	Leuciscidae	Leuciscus	Leuciscus leuciscus	97.076	Midori2	GCGGTTAAACGAGAGGCCCTAGTTAATAATACACGGCGTAAAGGGTGGTTAAGGAGAGCATAACAATAAAGCCGAATGGCCCTTTGGCTGTCATACGCTTCTAGGTGTCCGAAGTTCAACATACGAAAGTAACTTTAATAAACCCACCTGACCCCACGAAAGCTGAGAAA	17	7	31	35	4	64	72	18	19	12	36	28	49	45	40	196	221	62	137	91	77	127	99	0	46	19	59	59	62	162	0	96	56	101	915	1041	430	199
OTU_226	Chordata	Actinopteri	Cypriniformes	Leuciscidae	Leuciscus		96.512	Midori2	GCGGTTAAACGAGAGGCCCCAGTTAATAATACACGGCGTAAAGGGTGGTTAAGGAAAGTATTAACAATAAAGCCGAATGGCCCTTCTGTCATACGCTTCTAGGTGTCCGAAGCCCAATATACGAAAGTAGCTTTAATAAAGCCCACCTGACCCCACGAAAGCTGAGAAA	117	68	130	87	35	123	153	59	65	65	70	47	67	111	97	125	129	86	163	319	231	314	356	0	174	109	148	204	58	205	11	154	223	217	375	494	251	325
OTU_228	Chordata	Actinopteri	Petromyzontiformes	Petromyzontidae	Lampetra	Lampetra fluviatilis/planeri	100	manual check	GCGGTTATACGAGGAGCTCAAGCTGATATCTCCGGCACAAAGCGTGATTAAAATACTAGCTTAACTAATACTATAGAAGCCATCATGCCTGCTAGTTGAATAGGTATGCTTAAATATCTCAACATCGAAAGAATCTATATTAATAAACTCACTTTGACATCACGAAAGCAAAACTCA	0	0	0	0	0	0	0	0	0	0	0	0	0	0	0	0	0	0	0	0	0	19	0	0	0	0	0	16	0	18	0	43	0	0	0	0	0	0
OTU_229	Chordata	Actinopteri	Perciformes	Percidae	Perca	Perca fluviatilis	98.125	Midori2	GCGGTTATACGAGAGGCCCAAGTTGATAGACATCGGCGTAAAGCGTGGTTAAGATTAAAGACAATACTAAAGCCGAACACCTTCAGAGCTATACGCATCCGAAGGTAAGAAGTTCAACCACGAAAGTGGCTTTATAGCCCCTGAACCCACGAAAGCTGAGAAA	3	7	13	3	3	13	4	6	3	3	4	0	3	4	3	13	4	7	7	42	43	62	27	0	38	9	48	51	729	43	13	58	44	31	84	143	328	1170
OTU_232	Chordata	Actinopteri	Gobiiformes	Gobiidae	Neogobius		96.386	Midori2	GCGGTTATACCTGCCAGCCAAGTTGACAAAAATCGGCGAAAAGCGTGGTTAGTGATATCACCTCCACTAAAGCCAAACACCTTCAAGGCTGTAATACGCCCCCGAAGACAGGAAGCCCAATCACGAAAGTAGCTTTAATTTTCATGAAGCCACGAAAGCTAGGAAA	0	0	0	0	0	0	0	0	0	0	0	0	0	0	0	0	0	0	0	0	0	308	0	0	0	0	0	0	0	0	0	0	0	0	0	0	0	0
OTU_233	Chordata	Actinopteri	Perciformes	Percidae	Perca	Perca fluviatilis	97.561	Midori2	GCGGTTATACGAGAGGCCCAAGTTGATAGACATCGGCGTAAAGCGTGGTTAAGATTAAAGATAATACTAAAGCCGAACACCTTCAGAGCTGTTATACGCATCCGAAGGTAAGAAGTTTAACTACGAAAGTGGCTTTATAGCCCCTGAACCCACGAAAGCTAGGAAA	0	1	0	0	0	0	0	0	0	0	0	0	0	0	0	0	0	0	0	5	0	5	21	0	0	0	721	3	2	3	0	1	0	0	3	7	5	497
OTU_234	Chordata	Actinopteri	Perciformes	Percidae			93.373	Midori2	GCGGTTATACGAGAGGCCCAAGTTGATAGACATCGGCGTAAAGCGTGGTTAGTGATATCACCTCCACTAAAGCCGAACACCTTCAGAGCTGTTATACGCATCCGAAGGTAAGAAGTTCAACCACGAAAGTGGCTTTATAGCCCCTGAACCCACGAAAGCTACGATA	0	0	3	3	0	0	0	2	0	2	2	0	0	0	1	4	2	1	3	32	54	67	24	0	13	3	41	49	29	28	0	39	24	16	57	120	49	32
OTU_235	Chordata	Actinopteri	Cypriniformes	Leuciscidae	Leuciscus	Leuciscus leuciscus	98.182	Midori2	GCGGTTAAACGAGAGGCCCTAGTTAATAATACACGGCGTAAAGGGTGGTTAAGGAGAGCATAACAAAAAGCCGAATGGCCCTTTGGCTGTCATACGCTTCTAGGTGTCCGAAGCCCAATATAAAAGTAGCTTTAATAAAGCCCACCTGACCCCACGAAAGCTACGATA	0	0	0	0	0	0	0	0	0	0	0	0	0	0	0	0	6	2	4	5	0	8	0	0	0	0	7	12	1293	23	0	12	5	8	59	176	20	7
OTU_237	Chordata	Actinopteri	Perciformes	Percidae	Perca		96.988	Midori2	GCGGTTATACAGGCCCAAGTTGATAGACATCGGCGTAAAGCGTGGTTAAGATTAAAGACAATAAAAGCCGAACACCTTCAGAGCTGTTATACGCATCCGAAGGTAAGAAGTTCAACCACGAAAGTGGCTTTATAGCCCCTGAACCCACGAAAGCTACGATA	0	0	0	0	0	0	0	0	0	0	0	0	0	0	0	0	0	0	0	0	0	0	0	0	0	0	274	0	0	0	0	0	0	0	0	0	0	0
OTU_238	Chordata	Actinopteri	Cypriniformes				96.45	Midori2	GCGGTTAGACGAGAGGCCCTAGTTGATATTACAACGGCGTAAAGGGTGGTTAAGGATAAACAAAGTCAAATGGCCCCTTGGCCGTCATACGCTTCTAGGAGTCCGAAGCCCTAATACGAAAGTAACTTTAATAAACCCACCTGACCCCACGAAAGCTGAGAAA	0	0	0	0	0	0	0	0	0	1	0	0	1	0	0	0	0	0	0	0	0	0	0	0	0	0	0	0	0	0	0	0	0	0	0	0	0	0
OTU_239	Chordata	Actinopteri	Cypriniformes	Leuciscidae	Abramis	Abramis brama	98.193	Midori2	GCGGTTATACGAGAGGCCCAAGTTAATAATACACGGCGTAAAGGGTGGTTAAGGAAAGTATTAACAATAAAGCCGAATGGCCCTTTGGCTGTCATACGCTTCTAGGTGTCCGAAGTTCAACATACGAAAGTAGCTTTAATAACGCCCACCTGAACCCACGAAAGCTACGATA	367	732	749	798	357	960	670	726	612	298	390	506	475	420	366	489	637	416	657	1530	1269	1280	896	133	777	424	1098	972	437	965	164	981	1035	776	777	1321	670	858
OTU_240	Chordata	Actinopteri	Gobiiformes	Gobiidae			93.373	Midori2	GCGGTTATACGAGAGGCCCAAGTTGACAAAAATCGGCGAAAAGCGTGGTTAAGATTAAAGACAATACTAAAGCCAAACACCTTCAAGGCTGTAATACGCCCCCGAAGACAGGAAGCCCAATCACGAAAGTAGCTTTAATTTTCATGAAGCCACGAAAGCTAGGAAA	31	88	121	101	105	84	104	132	50	114	44	43	80	54	71	122	97	85	86	485	684	662	451	33	189	136	569	476	290	418	21	428	401	315	581	902	616	426
OTU_242	Chordata	Actinopteri	Perciformes	Percidae	Sander	Sander lucioperca	97.484	manual check	GCGGTTATACGAGAGGCCCAAGTTGACAAAAATCGGCGAAAAGCGTGGTTAAGACAAAAACAAAACTAAAGCCGAACACCTTCAGAGCTGTTATACGCACCCGAAGGTAAGAAGTTCAACCACGAAAGTGGCTTTATTACCCCTGAACCCACGAAAGCTGAGAAA	0	36	81	155	80	193	110	166	89	130	111	49	116	110	107	44	122	158	116	338	301	409	314	0	248	197	603	374	127	435	0	547	588	686	400	768	567	352
OTU_243	Chordata	Actinopteri	Perciformes	Percidae	Perca		96.386	Midori2	GCGGTTATACGAGAGGCCCAAGTTGACAAAAATCGGCGTAAAGCGTGGTTAAGATTAAAGACAATACTAAAGCCGAACACCTTCAGAGCTGTTATACGCACCCGAAGGTAAGAAGTTCAACCACGAAAGTGGCTTTATTACCCCTGAACCCACGAAAGCTACGATA	2	12	12	20	11	11	17	22	7	20	9	5	11	5	12	8	9	19	17	113	127	200	88	0	47	17	156	113	78	118	4	153	179	146	198	334	234	104
OTU_244	Chordata	Actinopteri	Cypriniformes	Cyprinidae			94.737	Midori2	GCGGTTAGACGAGAGGCCCTAGTTGATATTATAACGGCGTAAAGGGTGGTTAGGGATAAATAATAATAAAGCCAAGCCCCCCTTGGCCGTCATACGCTTCTAGGTGTCCGAGGCCCTATATACGAAAGTAGCTTTAATAACGCCCACCTGACCCCACGAAAGCTGAGAAA	0	494	212	283	102	292	128	90	128	37	127	47	211	52	99	133	134	97	189	354	879	406	269	0	204	92	135	226	32	285	24	94	108	174	81	128	196	73
OTU_247	Chordata	Actinopteri	Cypriniformes	Leuciscidae	Squalius	Squalius cephalus	97.093	Midori2	GCGGTTATACGAGAGGCCCAAGTTAATAATACACGGCGTAAAGGGTGGTTAAGGAAAACATAACAATTAAAGCCGGATGGCCCTTTGGCTGTCATACGCTTCTAGGTGTCCGAAGCCCAATATACGAAAGTAGCTTTAATAAAGTCCACCTGACCCCACGAAAGCTGAGAAA	0	34	16	28	13	16	10	37	20	30	6	16	12	17	36	25	5	346	6	6	19	16	10	0	10	8	11	17	5	17	0	15	3	13	13	8	16	9
OTU_248	Chordata	Actinopteri	Cypriniformes	Leuciscidae	Abramis	Abramis brama	98.193	Midori2	GCGGTTAAACGAGAGGCCCCAGTTAATAATACACGGCGTAAAGGGTGGTTAAGGAAAGTATTAACAATAAAGCCGAATGGCCCTTTGGCTGTCATACGCTTCTAGGTGTCCGAAGTTCAACATACGAAAGTAACTTTAATAAACCCACCTGACCCCACGAAAGCTACGATA	0	0	38	84	27	156	134	21	21	1	71	106	98	47	89	165	157	110	181	248	251	302	316	0	183	0	130	92	51	370	0	267	172	103	415	399	294	202
OTU_249	Chordata	Actinopteri	Cypriniformes	Xenocyprididae	Ctenopharyngodon		96.532	Midori2	GCGGTTAAACGAGGGGCCCCAGTTGATAACACCACGGCGTAAAGGGTGGTTAAGGAAAGCAAAACAATAAAGCCAAATGGCCCTTTGGCCGTCATACGCTTCTAGGTGTCCGAAGTTCAACATACGAAAGTAGCTTTAATAACGCCCACCTGACCCCACGAAAGCTGAGAAA	0	0	0	0	0	0	0	0	0	0	0	0	0	0	0	0	0	0	0	0	0	0	0	0	0	0	0	0	0	0	0	18	0	0	0	0	0	0
OTU_251	Chordata	Actinopteri	Cypriniformes	Leuciscidae	Squalius	Squalius cephalus	97.076	Midori2	GCGGTTAAACGCAGGCCCTAGTTAATAATACACGGCTTAAAGGGTGGCTAAGGAAAACATAACAATAAAGCCGAATGGCCCTTTGGCTGTCATACGCTTCTAGGTGTCCGAAGCCCAATATACGAAAGTAGCTTTAATAAAGTCCACCTGACCCCACGAAAGCTGAGAAA	0	66	37	22	59	73	66	51	79	87	21	45	15	44	48	137	16	41	38	18	1158	89	32	0	21	60	21	14	7	30	0	17	62	23	24	36	50	20
OTU_252	Chordata	Actinopteri	Gobiiformes	Gobiidae	Neogobius		96.386	Midori2	GCGGTTATACGAGAGGCCCAAGTTGACAAAAATCGGCGAAAAGCGTGGTTAGTGATATCACCTCCACTAAAGCCACCCAAGGCTGTAATACGCCCCCGAAGACAGGAAGCCCAATCACGAAAGTAGCTTTAATTTTCATGAAGCCACGAAAGCTAGGAAA	0	0	0	0	0	0	0	0	0	0	0	0	0	0	1	0	0	0	0	0	0	0	0	0	0	0	0	0	0	0	0	0	0	0	0	0	0	0
OTU_253	Chordata	Actinopteri	Cypriniformes	Leuciscidae	Leuciscus		95.906	Midori2	GCGGTTAAACGAGAGGCCCTAGTTAATAATACACGGCGTAAAGGGTGGTTAAGGATAAACAAAAATAAAGTCAAATGGCCCCTTGGCCGTCATACGCTTCTAGGTGTCCGAAGCCCAATATACGAAAGTAGCTTTAATAAAGCCCACCTGACCCCACGAAAGCTGAGAAA	0	1	6	5	2	23	17	10	8	1	6	5	5	8	7	19	15	7	14	37	31	53	29	0	11	2	20	22	17	57	0	62	42	21	236	216	125	54
OTU_254	Chordata	Actinopteri	Cypriniformes	Leuciscidae	Abramis		96.512	Midori2	GCGGTTAAACGAGAGGCCCCAGTTAATAATACACGGCGTAAAGGGTGGTTAAGGAAAGTTAACAATAAAGCCGAATGGCCCTTTGGCTGTCATACGCTTCTAGGTGTCCGAAGTTCATATACGAAAGTAGCTTTAATAACGCCCACCTGACCCCACGAAAGCTAGGAAA	0	0	0	0	0	0	0	0	0	0	0	0	0	0	0	0	0	0	0	3	0	13	0	0	1	0	0	0	5	0	0	3	10	8	0	5	0	0
OTU_255	Chordata	Actinopteri	Perciformes	Percidae	Sander		96.97	Midori2	GCGGTTATACGAGAGATCAAAGTTGATAGACATCGGCGTAAAGCGTGGTTAAGACAAAAACAAAACTAAAGCCGAACACCTTCAGAGCTGTTATACGCACCCGAAGGTAAGAAGTTCAACCACGAAAGTGGCTTTATAGCCCCTGAACCCACGAAAGCTACGATA	0	0	3	2	2	0	3	3	0	4	1	0	3	5	0	0	6	3	3	16	27	23	11	0	11	0	16	11	8	15	0	30	14	24	46	71	36	421
OTU_256	Chordata	Actinopteri	Cypriniformes	Leuciscidae	Leuciscus	Leuciscus leuciscus	98.246	Midori2	GCGGTTAAACGAGAGGCCCTAGTTAATAATACACGGCGTAAAGGGTGGTTAAGGAAAGCACAATAATAAAGCCAAATGGCCCTTTGGCTGTCATACGCTTCTAGGTGTCCGAAGCCCAATATACGAAAGTAGCTTTAATAAAGTCCACCTGACCCCAAAAGCTGAGAAA	2	2	314	140	186	357	923	78	241	340	352	219	73	275	439	744	111	256	115	40	214	123	698	0	1009	599	292	426	449	132	2	311	440	421	741	407	154	164
OTU_257	Chordata	Actinopteri	Perciformes	Percidae	Sander	Sander lucioperca	98.742	manual check	GCGGTTATACGAGAGGCCCAAGTTGATAGACATCGGCGTAAAGCGTGGTTAAGACAAAAACAAAACTAAAGCCGAACACCTTCAGAGCTGTTATACGCACCCGAAGGTAAGAAGTTCAACCACGAAAGTGGCTTTATTACACCTGACCCCACGAAAGCTGAGAAA	0	7	28	57	18	49	41	34	14	36	37	7	32	36	34	14	27	49	69	47	50	97	70	0	53	30	61	48	22	59	0	69	62	101	102	162	137	65
OTU_258	Chordata	Actinopteri	Cypriniformes	Leuciscidae	Leuciscus	Leuciscus leuciscus	98.246	Midori2	GCGGTTAAACGAGAGGCCCTAGTTAATAATACACGGCGTAAAGGGTGGTTAAGGAAAGCACAATAATAAAGCAAAATGGCCCTTTGGCCGTCATACGCTTCTAGGTGTCCGAAGCCCAATATACGAAAGTATCTTTAATAAAGCCCACCTGACCCCACGAAAGCTGAGAAA	0	0	0	0	0	34	43	0	22	27	30	15	4	13	19	45	5	0	5	3	9	5	39	0	18	64	9	25	505	9	1	12	26	28	38	16	7	9
OTU_261	Chordata	Actinopteri	Gobiiformes	Gobiidae	Neogobius	Neogobius melanostomus	98.171	Midori2	GCGGTTATACGAGAGGCCCAAGTTGACAAAAATCGGCGAAAAGCGTGGTTAGTGATATCACCTCCACTAAAGCCAAACACCTTCAAGGCTGTAATACGCCCCCGAAGACAGGAAGCCCAATCACGAAAGTAGCTTTAATTTTCATGAAGCCACAATAGCTAAGACC	33	43	46	19	16	14	26	16	9	6	9	5	27	17	12	10	16	11	21	12	23	15	37	0	22	19	17	26	6	20	0	20	28	20	15	16	21	12
OTU_263	Chordata	Actinopteri	Gobiiformes	Gobiidae	Neogobius	Neogobius melanostomus	98.137	Midori2	GCGGTTATACGAGATGCCCAAGTTGACAAAAATCCGCGAAAAGCGTGGTTAGTGATATCACCTCCACTAAAGCCAAACACCTTCAAGGCTGTAATACGCCCCCGAAGACAGGAAGCCCAATCACGAAAGTACTTTAATTTTCATGAAGCCACGAAAGCTAAAA	0	0	0	0	0	0	0	0	1	0	0	0	0	0	0	0	0	0	0	3	2	0	0	0	0	3	0	0	0	0	0	0	0	0	4	4	2	0
OTU_264	Chordata	Actinopteri	Cypriniformes	Leuciscidae	Abramis	Abramis brama	98.193	Midori2	GCGGTTAAACGAGAGGCCCCAGTTAATAATACACGGCGTAAAGGGTGGTTAAGGAAAGTATTAACAATAAAGCCAAATGGCCCTTTGGCTCATACGCTTCTAGGTGTCCGAAGTTCAACATACGAAAGTAGCTTTAATAACGCCCACCTGACCCCACGAAAGCTACGATA	1	7	7	3	0	4	1	0	42	2	1	96	0	2	0	1	5	0	29	6	10	12	10	0	735	40	15	114	911	30	0	23	18	4	1	12	14	15
OTU_265	Chordata	Actinopteri	Cypriniformes	Leuciscidae	Abramis	Abramis brama	97.59	Midori2	GCGGTTAAACGAGAGGCCCCAGTTAATACACGGCGTAAAGTGTGGTTAAGGAAAGTATTAACAATAAAGCCGAATGGCCCTTTGGCTGTCATACGCTTCTAGGTGTCCGAAGTTCAACATACGAAAGTAGCTTTAATAACGCCCACCTGACCCCACGAAAGCTACGATA	0	2	0	2	1	1	1	0	1	1	3	1	1	0	1	4	0	0	1	12	12	9	4	0	8	2	38	26	859	7	0	7	15	10	13	26	24	16
OTU_267	Chordata	Actinopteri	Perciformes	Percidae	Perca	Perca fluviatilis	100	Midori2	GCGGTTATACGAGAGGCCCAAGTTGATAGACATCGGCGTAAAGCGTGGTTAAGATTAAAGACAATACTAAAGCCGAACACCTTCAGAGCTGTTATACGCATCCGAAGGTAAGAAGTTCAACCACGAAAGTGGCTTTATAGCCCCTGAACCCACGAAAGCCAGGGCC	370	482	487	282	402	281	330	401	226	488	447	409	327	269	278	406	266	301	400	548	787	669	578	1180	425	557	533	438	831	507	458	519	433	403	571	690	545	507
OTU_268	Chordata	Actinopteri	Cypriniformes	Cyprinidae	Cyprinus	Cyprinus carpio	97.647	manual check	GCGGTAGACGAGAGGCCCTAGTTGATATTACAACGGCGTAAAGGGTGGTTAAGGATAAACAAAAATAAAGTCAAATGGCCCCTTGGCCGTCATACGCTTCTAGGAGTCCGAAGCCCTAATACGAAAGTAGCTTTAATAACGCCCACCTGACCCCACGAAAGCTGAGAAA	0	75	329	200	159	460	391	215	163	129	268	216	338	291	331	814	471	403	541	1036	796	991	944	117	664	160	660	387	437	1635	62	1105	702	743	2677	2384	1359	973
OTU_269	Chordata	Actinopteri	Cypriniformes	Leuciscidae	Leuciscus		95.906	Midori2	CGGTTAAACGACCCCCCAGTTAATAATACACGGCGTAAAGGGTGGTTAAGGAAAGTATTAACAATAAAGCCGAATGGCCCTTTGGCTGTCATACGCTTCTAGGTGTCCGAAGCCCAATATACGAAAGTAGCTTTAATAAAGCCCACCTGACCCCACGAAAGCTGAGAAA	41	28	32	46	9	50	55	21	24	18	26	18	26	44	50	50	60	66	76	126	102	122	80	0	58	47	69	134	31	161	16	106	94	64	184	349	133	114
OTU_270	Chordata	Actinopteri	Cypriniformes	Leuciscidae	Rutilus	Rutilus rutilus	97.661	Midori2	GCGGTTAAACGAGAGGCCCCAGTTAATAATACACGGCGTAAAGGGTGGTTAAGGGAAGCACAACAATAAAGCCAAATGGCCCTTTGGCTGTCATACGCTTAGGTGTCCGAAGCCCAATATACGAAAGTAGCTTTAATAAAGCCCACCTGACCCCACGAAAGCTGAGAAA	0	5	34	22	4	12	12	130	165	10	4	5	14	8	5	19	7	19	22	22	14	21	5	0	15	2	350	11	12	22	18	10	15	8	11	34	52	9
OTU_271	Chordata	Actinopteri	Cypriniformes	Leuciscidae	Rutilus	Rutilus rutilus	98.81	Midori2	CCTGTTAAACGAGAGGCCCTAGTTAATAATACACGGCGTAAAGGGTGGTTAAGGGAAGCACAATAATAAAGCCAAATGGCCCTTTGGCTGTCATACGCTTCTAGGTGTCCGAAGCCCAATATACGAAATTAGCTTTAATAAAGTCCACCTGACCCCACGAAAGCTGAGAAA	41	114	1127	207	105	225	331	217	263	426	83	118	297	427	406	697	182	445	324	769	760	209	371	0	290	205	305	307	344	762	50	584	366	602	1012	765	1139	476
OTU_272	Chordata	Actinopteri	Cypriniformes	Leuciscidae	Rutilus	Rutilus rutilus	97.661	Midori2	GCGGTTAAACGAGAGGCCCCAGTTAATAATACACGGCGTAAAGGGTGGTTAAGGGGAGCACAATAATAAAGCCAAATGGCCCTTTGGCTGTCATACGCTTCTAGGTGTCCGAAGCCCAATATACGAAAGTAACTTTAATAAACCCACCTGACCCCACGAAAGCTGAGAAA	31	6	70	23	26	73	77	63	32	37	41	41	65	127	124	204	72	145	110	237	109	165	157	0	132	21	135	89	163	293	17	356	311	209	497	355	270	140
OTU_273	Chordata	Actinopteri	Cypriniformes	Leuciscidae	Abramis	Abramis brama	98.193	Midori2	GCGGTTAAACGAGAGGCCCCAGTTAATAATACATGCGTAAAGGGTGATTAAGGAAAGTATTAACAATAAAGCCGAATGGCCCTTTGGCTGTCATACGCTTCTAGGTGTCCGAAGTTCAACATACGAAAGTAGCTTTAATAACGCCCACCTGACCCCACGAAAGCTACGATA	1	0	0	0	0	0	15	0	0	0	0	2	0	0	3	0	0	0	0	6	0	5	18	0	0	0	6	3	839	1	0	0	9	3	5	0	3	9
OTU_275	Chordata	Aves	Passeriformes	Corvidae	Corvus	Corvus corone	99.435	manual check	GCGGTCATACAGGAGACTCAAATTAACAGTATAACGGCGTAAAGGGTGGTAACATGCTATCTAATAACTAAGATTAAAAAGCAACTGAGATGTAATAATCCCAAGATGCTCATAAGGCCAACTATCAAAGAAGATCTTAGACTAACGATTAATTGAAATCCACGAAAGCCAGGGCC	0	0	0	0	0	0	0	0	0	0	0	0	0	0	0	0	0	0	0	0	0	0	465	0	0	0	0	0	0	0	0	0	0	0	0	0	0	0
OTU_276	Chordata	Aves	Passeriformes	Passeridae	Passer	Passer domesticus/montanus	98.876	Midori2	GCGGTCATACAGGAGACCCAAATTAACATTATAACGGCGTAAAGCGTGGTTACATGTTATCCAAGTAACTAAGATTAAAAAGCAACTGAGCCGTCATAAGCCCAAGATGCCAATAAGGCCCCCTTATTAAAGAAGATCTTAGGACAACGATTAATTGACCCCACGAAAGCCAGGGCC	0	0	0	64	0	0	0	0	0	0	0	0	0	0	0	0	0	0	0	179	0	0	27	0	0	0	0	0	0	0	0	0	0	0	0	0	0	0
OTU_278	Chordata	Actinopteri	Cypriniformes				95.266	Midori2	GCGGTTAAACGAGAGGCCCTAGTTAATAATACACGGCGTAAAGGGTGGTTAAGGATAAAAATAAAGTCAAATGGCCCCTTGGCCGTCATACGCTTCTAGGAGTCCGAAGCCCTAATACGAAAGTAACTTTAATAAACCCACCTGACCCCACGAAAGCTGAGAAA	0	60	181	148	115	328	337	160	104	153	144	137	225	265	351	776	362	383	435	377	368	365	421	0	396	135	297	182	296	771	25	563	343	392	1768	1180	1012	589
OTU_279	Chordata	Actinopteri	Gobiiformes	Gobiidae	Neogobius	Neogobius melanostomus	98.16	Midori2	TCGGTTATACGAGAGGCCCAAGTTGACAAAAATCGGCGAAAAGCGTGGTTAGTGATATCACCTCCACTAAAGCCAAACACCTTCAAGGCTGTAATACGCCCCCGAAGACATGTAGCCCAATCACGAAAGTAGCTTTAATTTTCATGAAGCCACGAAAGCTACGATA	0	6	8	11	3	11	7	10	1	8	10	6	7	5	7	13	3	6	15	33	57	49	20	0	27	34	67	55	1058	50	2	53	32	33	49	94	59	36
OTU_280	Chordata	Actinopteri	Perciformes	Gasterosteidae	Gasterosteus	Gasterosteus aculeatus	99.383	Midori2	GCGGTATACGAGAGGCCCAAGTTGATGAATTACGGCGTAAAGAGTGGTTAAGCTAAAATTAAAACTAAAGCCGAACACCCCCAAAGCTGTTATACGCATCCGGAGGTGAGAAGTTCAACCACGAAGGTGGCTTTATCTAACCTGAACCCACGAAAGCTACGATA	0	38	14	12	9	7	17	16	34	16	10	14	4	4	6	21	15	7	15	19	932	51	110	5	61	15	62	96	16	61	12	76	20	40	115	118	30	45
OTU_281	Chordata	Actinopteri	Gobiiformes	Gobiidae	Neogobius	Neogobius melanostomus	97.561	Midori2	GCGGTTATACGAGAGGCCCAAGTTGACAAAAAATCGCGAAAAGCGTGGTTAGTGATATCACCTCCACTAAAGCCAAACACCTTCAAGGCTGTAATACGCCCCCGAAGACAGGAAGCCCAATCACGAAAGTAGCTTTAATTTTCATGAAGCCACGAAAGCTACGATA	2	8	8	6	3	9	7	9	7	8	10	3	7	7	8	11	11	15	10	119	184	146	133	0	123	83	448	209	59	159	2	463	340	98	169	397	181	114
OTU_282	Chordata	Actinopteri	Cypriniformes	Cyprinidae	Cyprinus	Cyprinus carpio	98.182	manual check	GCGGTTAGACGAGAGGCCCTAGTTGATATTACAACGGCGTAAAGGGTGGTTAAGGATAAACAAAAATAAAGTCAAATGGCCCCTTGGCCGTCATACGCTTCTAGGAGTCCGAAGCCCTAATACGAAATTCCAACTTTAATAAACCCACCTGACCCCACGAAAGCTACGATA	0	1	0	2	0	2	2	1	2	2	4	1	2	4	2	5	3	12	3	5	15	14	10	0	5	2	17	3	763	22	0	10	12	9	37	11	12	6
OTU_283	Chordata	Actinopteri	Gobiiformes	Gobiidae	Neogobius	Neogobius melanostomus	97.561	Midori2	GCGGTTATACGAGCCCAAGTTGACAAAAATCGGCGAAAAGCGTGGTTAGTGATATCACCTCCACTAAAGCCAAACACCTTCAAGGCTGTAATACGCCCCCGAAGACAGGAAGCCCAATCACGAAAGTAGCTTTAATTTTCATGAAGCCACGAAAGCTACGATA	5	8	14	15	8	10	14	20	6	29	7	4	12	7	9	19	9	13	22	69	101	89	72	4	50	28	71	53	716	97	4	94	48	42	91	101	93	62
OTU_284	Chordata	Actinopteri	Cypriniformes	Leuciscidae	Abramis		96.512	Midori2	GCGGTTAAACGAGAGGCCCTAGTTAATAATACACGGCGTAAAGGGTGGTTAAGGAAAGTATTAACAATAAAGCCGAATGGCCCCCCCTGTCATACGCTTCTAGGTGTCCGAAGTTCAACATACGAAAGTAGCTTTAATAACGCCCACCTGACCCCACGAAAGCTGAGAAA	31	27	41	28	6	37	47	62	16	13	16	14	38	31	23	67	31	42	49	193	172	174	138	0	183	10	67	142	37	611	1	86	200	93	276	268	181	133
OTU_285	Chordata	Mammalia	Rodentia	Cricetidae	Microtus		96.951	Midori2	GCGGTTATACGAGAGGCCCAAACTAATTATTCTCGGCGTAAAACGTGTTACTAGAAATATGCAAAATAGAATTAAAATCCATCCAATATGTGAAAATTCATCGCTGGACCTAAAACCAATGACGAAAGTAATTCTAATAAGCCTGATACACGATAGCTAAGGTA	0	0	0	0	0	0	0	0	0	0	0	1	0	14	0	0	0	0	5	0	2	0	3	0	1	8	2	11	0	0	0	0	96	105	0	0	3	13
OTU_286	Chordata	Actinopteri	Cypriniformes	Leuciscidae	Rutilus	Rutilus rutilus	97.661	Midori2	GCGGTTAAACGAGAGGCCCTAGTTAATAATACACGGCGTAAAGGGTGGTTAAGGGAAGCACAATAATAAAGCCAAATGGCCCTTTGGCTGTCATACGCTTCTAGGTGTCCGAAGCCCGTTATACGAAAGTAGCTTTAACAACGCCCACCTGACCCCACGAAAGCTGAGAAA	27	5	11	12	4	31	37	4	6	35	14	4	5	7	35	6	7	47	8	44	6	11	6	0	21	19	14	9	11	49	15	20	9	16	26	17	11	8
OTU_289	Chordata	Actinopteri	Gobiiformes	Gobiidae	Neogobius		96.988	Midori2	GCGGTTATACGAGAGGCCCAAGTTGACAAAAATCGGCGAAAAGCGTGGTTAGTGATATCACCTCCACTAAAGCCAAACACCTTCAAGGCTGTAATACGCCCCCGAAGACAGGAAGCCCAATCACGAAAGTAGCTTTAATTTTCAAGCCACGAAAGCTGAGAAA	46	50	65	72	32	83	52	50	40	23	47	51	34	50	53	88	63	60	79	66	86	84	66	12	693	19	60	78	20	627	6	75	69	68	367	138	70	378
OTU_290	Chordata	Actinopteri	Gobiiformes	Gobiidae	Neogobius		96.988	Midori2	GCGGTTATACGAGAGCCCAAGTTGACAAAAATCGGCGAAAAGCGTGGTTAGTGATATCACCTCCACTAAAGCCAAACACCTTCAAGGCTGTAATACGCCCGAAGACAGGAAGCCCAATCACGAAAGTAGCTTTAATTTTCATGAAGCCACGAAAGCTGAGAAA	12	3	3	5	3	3	2	4	2	8	6	3	2	6	3	0	3	5	0	4	18	17	23	0	1143	2	5	2	6	9	0	14	8	10	24	32	9	7
OTU_293	Chordata	Actinopteri	Cypriniformes	Leuciscidae	Rutilus	Rutilus rutilus	97.674	Midori2	GCGGTTAAACGAGGGGCCCTAGTTAATAATACACGGCGTAAAGGGTGGTTAAGGGGAGCACAATAATAAAAGCCAAATGGCCCTTTGGCTGTCATACGCTTCTAGGTGTCCGAAGCCCAATATACGAAAGTAGCTTTAATAAAGTCCACCTGACCCCACGAAAGCTGAGAAA	220	4	21	10	0	112	31	184	21	4	662	111	53	258	184	45	16	245	20	56	3609	56	31	0	75	25	81	32	47	66	8	172	297	95	47	603	96	54
OTU_295	Chordata	Actinopteri	Cypriniformes	Leuciscidae	Squalius	Squalius cephalus	97.076	Midori2	GCGGTTAAACGAGAGGCCCTAGTTAATAATACACGGCGTAAAGGGTGGTTAAGGAAAACATAACAATAAAGCCGAATTGCCCTTTGCCTGTCATACGCTTCTAGGTGTCCGAAGCCCAATATACAAAGTAGCTTTAATATAGTCCACCTGACCCCACGAAAGCTGAGAAA	0	6	0	3	0	0	0	1	3	0	0	1	2	0	1	0	0	2	4	0	0	1	0	0	0	3	0	0	1	49	0	37	1	2	0	0	0	6
OTU_296	Chordata	Actinopteri	Cypriniformes	Leuciscidae	Rutilus	Rutilus rutilus	97.661	Midori2	GCGGTTAAACGAGAGGCCCTAGTTAATAATACACGGCGTAAAGGGTGGTTAAGGGAAGCAATAATAAAGCCAAATGGCCCTTTGGCTGTCATACCTTCTAGGTGTCCGAAGCCCAATATACGAAAGTAGCTTTAATAAGGCCCACCTGACCCCACGAAAGCTGAGAAA	6	6	85	22	10	56	6	17	58	12	23	6	25	21	9	21	4	14	60	26	7	4	6	0	16	4	51	13	18	12	9	12	4	666	282	35	42	12
OTU_298	Chordata	Actinopteri	Cypriniformes	Leuciscidae	Squalius		95.954	Midori2	GCGGTTAAACGAGAGGCCCTAGTTGATTTTATCACGGCGTAAAGGGTGGTTAAGGAAAACATAACAATTAAAGCCGGATGGCCCTTTGGCTGTCATACGCTTCTAGGTGTCCGAAGCCCAATATACGAAAGTAGCTTTAATAAAGTCCACCTGACCCCACGAAAGCTGAGAAA	0	7	0	0	6	10	0	11	0	1	6	0	0	10	16	1	0	3086	5	0	10	0	0	0	0	0	0	0	0	3	0	0	0	0	2	0	0	0
OTU_299	Chordata	Actinopteri	Perciformes	Percidae	Perca	Perca fluviatilis	98.125	Midori2	GCGGTTATACGAGAGGCCCAAGTTGATAGACATCGGCGTAAAGCGTGGTTAAGATTATACAATACTAAAGCCGAACACCTTCAGAGCTGTTATACGCATCCGAAGGTAAGAAGTTCAACCACGAAAGTGGCTTTATAGCCCCTGAACCCACGAAAGCTGAGAAA	3	8	3	7	3	11	5	4	2	8	1	8	5	2	5	6	3	4	6	59	56	55	44	0	41	9	41	27	652	46	2	47	34	28	101	90	62	36
OTU_302	Chordata	Actinopteri	Cypriniformes	Leuciscidae	Rutilus	Rutilus rutilus	97.661	Midori2	GCGGTTAAACGAGAGGCCCTAGTTAATAATACACTGCGTAAAGGGTGGTTAAGGGAAGCACAACAATAAAGCCAAATGGCCCTTTGTCTGTCATACGCTTCTAGGTGTCCGAAGCCCAATATACGAAAGTAGCTCTAATAAAGCCCACCTGACCCCACGAAAGCTGAGAAA	0	0	0	0	0	0	0	0	0	0	1	0	0	1	0	0	0	0	0	17	11	34	5	0	1	1	562	0	0	11	0	7	0	0	0	0	0	0
OTU_303	Chordata	Actinopteri	Cypriniformes	Leuciscidae	Leuciscus		96.512	Midori2	GCTGTTAATCGAAAGGCCCCAGTTAATAATACACGGCGTAAAGGGTGGTTAAGGAAAGTATTAACAATAAAGCCGAATGGCCCTTTGGCTGTCATACGCTTCTAGGTGTCCGAAGCCCAATATACGAAAGTAGCTTTAATAAAGCCCACCTGACCCCACGAAAGCTGAGAAA	30	21	37	59	16	100	87	35	30	32	30	25	31	39	37	107	72	47	96	224	169	234	98	0	80	54	118	169	52	127	6	160	211	114	377	614	266	253
OTU_305	Chordata	Actinopteri	Gobiiformes	Gobiidae	Ponticola		95.122	Midori2	GCGGTTATACGAGAGGCCCGAGTTGACAAACATTCGGCGTAAAGCGTGGTTAATAACTTACTAAAGCCAAACACCTTTAAGGCTGTTATACGCCCCCAAAGGTAGGAAGACCCCTCACGAAAGTAGCTTTAATTTTCATGAAGCCACGAAAGCTAGGAAA	0	274	178	112	65	181	195	222	145	116	250	41	94	154	110	172	100	190	219	1003	1265	1258	738	0	560	96	1192	870	376	1256	0	565	287	1349	1364	409	750	655
OTU_306	Chordata	Actinopteri	Cypriniformes	Leuciscidae	Leuciscus		96.512	Midori2	GCGGTTATACGAGAGGCCCAAGTTAATAATACACGGCGTAAAGGGTGGTTAAGGAAAACATAACAATAAAGCCGAATGGCCCTTTGGCTGTCATACGCTTCTAGGTGTCCGAAGCCCAATAGTACGAAAGTAGCTTTAATAAAACCCACCTGACCCCACGAAAGCTAAGAAA	0	0	0	0	6379	85	40	2	0	53	0	0	0	59	0	39	60	118	64	0	0	5	0	0	0	0	8	1	9	15	0	5	11	0	7	29	3	1
OTU_309	Chordata	Actinopteri	Gobiiformes	Gobiidae	Neogobius	Neogobius melanostomus	98.773	Midori2	GCGGTTATACGAGAGGCCCAAGTTGACAAAAATCGGCGAAAAGCGTGGTTAGTGATATCACCTCCACTAAAGCCAAACACCTTCAAGGCTGTAATACGCCCCCGAAGACAGGAAGCCCAATCACGAAAGTAGCTTTAATTTTCATGAACCCACGAAAGCCAGGGCC	48	133	98	109	59	86	76	113	149	53	73	75	63	47	54	85	77	58	82	278	1315	269	882	214	214	197	1079	753	110	396	221	774	687	588	290	634	637	742
OTU_310	Chordata	Actinopteri	Cypriniformes	Leuciscidae	Vimba/Blicca	Vimba vimba / Blicca bjeorkna	99.394	manual check	GCGGTTAAACGAGAGGCCCCAGTTAATAATACACGGCGTAAAGGGTGGTTAAGGAAAGTATAACGAAAAGCCGAATGGCCCTTTGGCTGTCATACGCTTCTAGGTGTCCGAAGTCCAATATACGAAAGTAGCTTTAATAGAGCCCACCTGACCCCACGAAAGCTACGATA	0	0	0	0	0	0	0	0	0	0	0	0	0	0	0	0	0	0	0	20	18	0	0	0	15	0	0	0	0	421	0	0	0	0	0	0	0	0
OTU_312	Chordata	Actinopteri	Cypriniformes	Leuciscidae	Abramis	Abramis brama	100	Midori2	GCGGTTAAACGAGAGGCCCCAGTTAATAATACACGGCGTAAAGGGTGGTTAAGGAAAGTATTAACAATAAAGCCGAATGGCCCTTTGGCTGTCATACGCTTCTAGGTGTCCGAAGTTCAACATACGAAAGTAGCTTTAATAACGCCCACCTGACCCCACGAAAGCCAGGGCC	332	41	0	115	29	68	536	0	165	0	134	426	40	229	0	0	74	0	50	0	0	0	0	0	0	0	0	0	0	0	0	0	0	0	0	0	0	0
OTU_313	Chordata	Actinopteri	Cypriniformes	Leuciscidae	Abramis		96.512	Midori2	GCGGTTATACGAGAGGCCCCAGTTAATAATACACGGCGGGTGGTTAAGGAAAGTATTAACAATAAAGCCGAATGGCCCTTTGGCTGTCATACGCTTCTAGGTGTCCGAAGTTCAACATACGAAAGTAGCTTTAATAACGCCCACCTGACCCCACGAAAGCTGAGAAA	17	34	39	25	20	37	36	23	32	12	21	18	18	24	10	22	28	22	27	76	77	54	44	0	40	11	180	75	18	44	4	46	396	37	47	102	56	45
OTU_314	Chordata	Actinopteri	Perciformes	Percidae	Perca		96.988	Midori2	GCGGTTATACGAGAGGCCCAAGTTGATGGACATCGGCGTAGCGTGGTTAAGATTAAAGACAATACTAAAGCCGAACACCTTCAGAGCTGTTATACGCATCCGAAGGTAAGAAGTTCAACCACGAAAGTGGCTTTATAGCCCCTGAACCCAAAAGCTACGATA	0	3	7	0	2	4	3	5	2	5	8	4	5	0	1	8	3	2	10	2	8	7	30	13	17	13	12	6	14	11	8	8	5	9	7	21	8	537
OTU_315	Chordata	Actinopteri	Cypriniformes				97.633	Midori2	TCGGTTAGACGAGAGGCCCTAGTTGATATTACAACGGCGTAAAGGGTGGTTAAGGATAAACAAAAATAAAGTCAAATGGCCCCTTGGCCGTCATACGCTTCTAGTCCGAAGCCCTAATACGAAAGTAACTTTAATAACGCCCACCTGACCCCACGAAAGCTGAGAAA	0	42	172	143	143	266	197	147	73	36	113	152	186	131	141	274	227	166	281	512	470	583	486	0	354	42	293	205	117	726	31	485	330	288	796	783	458	412
OTU_316	Chordata	Actinopteri	Cypriniformes	Leuciscidae	Leuciscus	Leuciscus leuciscus	99.394	Midori2	GCGGTTAAACGAGAGGCCCCAGTTAATAATACACGGCGTAAAGGGTGGTTAAGGAGAGCATAACAATAAAGCCGAATGGCCCTTTGGCTGTCATACGCTTCTAGGTGTCCGAAGCCCAATATACGAAAGTAGCTTTAATAAAGCCCACCTGACCCCACGAAAGCTACGGCA	1082	363	416	1009	63	1011	1242	282	316	169	486	284	320	289	319	1706	2912	899	2004	1571	1400	2150	1043	0	717	387	1006	1017	496	875	0	896	615	1374	5671	12716	4470	3372
OTU_317	Chordata	Actinopteri	Cypriniformes	Leuciscidae			95.93	Midori2	GCGGTTAAACGAGAGGCCCCAGTTAATACACGGCGTAAAGTGTGGTTAAGGAAAGTATTAACAATAAAGCCGAATGGCCCTTTGGCTGTCATACGCTTCTAGGTGTCCGAAGCCCAATATACGAAAGTAGCTTTAATAAAGCCCACCTGACCCCACGAAAGCTGAGAAA	0	3	3	3	0	4	5	2	0	1	3	0	1	0	1	3	1	2	3	44	0	4	2	0	6	0	49	69	31	12	0	20	16	6	35	46	31	35
OTU_318	Chordata	Actinopteri	Cypriniformes	Leuciscidae	Squalius	Squalius cephalus	97.076	Midori2	GCGGTTATACGAGAGGCCCTAGTTAATAATACACGGCGTAAAGGGTGGTTAAGGAAAACATAAATAAAGCCGAATGGCCCTTTGGCTGTCATACGCTTCTAGGTGTCCGAAGCCAAATATACGAAAGTAGCTTTAATAAAGTCCACCTGACCCCACGAAAGCTGAGAAA	0	40	18	25	26	28	35	35	55	28	49	34	36	31	35	56	18	29	14	28	36	24	51	0	38	13	65	197	38	54	0	24	80	32	81	80	109	38
OTU_319	Chordata	Actinopteri	Gobiiformes	Gobiidae	Neogobius	Neogobius melanostomus	97.59	Midori2	GCGGTTATACGAGAGGCCCAAGTTGACAAAAATCGGCGAAAAGCGTGGTTAGTGATATCACCTCCACTAAAGCCAAACACCTTCAAGGCTGTAATACCCCCCGGAGACGAAGCCCAATCACGAAAGTAGCTTTAATTTTCATGAAGCCACGAAAGCTAGGAAA	0	0	0	0	0	0	0	0	0	0	0	0	0	0	0	0	0	0	0	0	17	6	0	0	0	0	1	6	0	0	0	4	5	0	16	4	6	14
OTU_320	Chordata	Actinopteri	Gobiiformes	Gobiidae	Neogobius	Neogobius melanostomus	98.193	Midori2	GCGGTTATACGAGAGGCCCAAGTTGACAAAAATCGGCGAAAAGCGTGGTTAGTGATATCACCTCCACTAAAGCCAAACACCTTCAAGGCTGTAATACGCCCCCGAAGACAGGAAGCCCAATCACGAAAGTAGCTTTAATTTTCATGAAGCCACGACAGTTGAGGAA	3	9	13	4	0	6	14	5	10	5	4	4	6	4	6	9	4	7	5	10	12	25	5	0	9	12	3	10	2	16	0	17	6	8	6	18	9	9
OTU_321	Chordata	Actinopteri	Cypriniformes	Leuciscidae	Alburnus	Alburnus alburnus	98.246	Midori2	GCGGTTAGACGAGGGGCCCTAGTTAATAATACGCGGCGTAAAGGGTGGTTAAGGAAAGCATAACAATAAAGCCGAATGGCCCCTTGCTGTCATACGCTTCTAGGTGTCCGAAGCCCAATATACGAAAGTAGCTTTAATAAGGCCCACCTGACCCCACGAAAGCTGAGGAA	0	0	0	0	0	0	0	0	0	0	0	0	0	0	0	0	0	0	0	0	0	0	0	0	0	0	0	0	192	0	0	0	0	0	0	0	0	0
OTU_323	Chordata	Actinopteri	Gobiiformes	Gobiidae	Ponticola	Ponticola kessleri	97.531	Midori2	GCGGTTATACGAGAGGCCCGAGTTGACAAACATTCGGCGTAAAGCGTGGTTAATAACTTATTTACTAAAGCCAAACACCTTTAAGGCTGTTATACGCCCCCAAAGGTAGGAAGACCCCTCACGAAAGTAGCTTTTACTATGAATCCACGAAAGCTACGATA	0	0	0	0	0	0	0	2	0	0	1	0	0	0	0	0	0	0	2	3	3	6	0	0	1	0	4	2	7	2	0	5	1	10	43	2	2	1
OTU_324	Chordata	Actinopteri	Perciformes	Percidae	Sander		96.364	Midori2	GCGGTTATACGAGAGGCCCAAGTTGATAGACATCGGCGTAAAGCGTGGTTAAGACAAAAACAAAACTAAAGCCGAACACCTTCAGAGCTTACGCACCCGAAGGTAAGAAGTTCAACCACGAAAGTGGCTTTATAGCCCCTGAACCCACGAAAGCTACGATA	0	0	0	7	1	2	4	2	0	3	0	0	0	1	0	2	0	1	4	4	15	14	80	0	10	9	23	14	7	14	0	9	149	27	12	34	66	12
OTU_325	Chordata	Actinopteri	Cypriniformes	Leuciscidae	Rutilus	Rutilus rutilus	97.674	Midori2	GCGGCTAAACGAGGGGCCCTAGTTAATAATACACGGCGTAAAGGGTGGTTAAGGGAAGCACAATAATAAAGCCAAAATGGCCCTTTTGCTGTCATACGCTTCTAGGTGTCCGAAGCCCAATATACGAAAGTAGCTTTAATAAAGCCCACCTGACCCCACGAAAGCTGAGAAA	0	5	13	0	4	3	3	6	5	8	5	0	5	22	7	0	2	15	9	7	33	8	11	0	2	7	2	2	13	489	8	10	9	14	10	10	3	9
OTU_326	Chordata	Actinopteri	Gobiiformes	Gobiidae	Neogobius		96.386	Midori2	GCGGTTATACGAGAGGCCCAAGTTGACAAAAATCGGCGAAAAGCGTGGTTAGTGATATCACCTCCACTAAAGCCAAACACCTTCAAGGCTGTAATACGCCCCCAAAGGTAGGAAGACCCCTCACGAAAGTAGCTTTAATTTTCATGAAGCCACGAAAGCTAGGAAA	0	101	61	43	26	59	38	85	58	34	67	14	24	75	25	45	30	41	46	177	199	225	135	0	106	40	164	136	87	180	0	114	59	232	260	93	112	89
OTU_327	Chordata	Actinopteri	Perciformes	Percidae	Perca		95.783	Midori2	GCGGTTATACGAGAGGCCCAAGTTGATAGACATCGGCGTAAAGCGTGGTTAAGATTAAAGACAATACTAAAGCCGAACACCTTCAGAGCTGTTATACGCACCCGAAGGTAAGAAGTTCACGAAAGTGGCTTTATTACCCCTGAACCCACGAAAGCTACGATA	0	0	8	3	2	2	0	3	0	3	2	1	3	1	2	0	0	6	0	7	8	36	15	0	7	0	37	8	14	18	0	20	25	13	14	42	77	10
OTU_328	Chordata	Actinopteri	Cypriniformes	Leuciscidae	Abramis	Abramis brama	98.193	Midori2	GCGGTTAAACGAGAGGCCCCAGTTAATAATACACGGCGTAAAGGGTGGTTAAGGAAAGTATTAACAATAAAGCCGAATGGCCCTTTGGCTGTCATACGCTTCTAGGTGTCCGAAGTTCAACATACGAAAGTAGCTTTAATAACGCCCACCCCCCACGAAAGCTACGATA	71	110	167	151	101	127	131	159	82	164	74	65	77	80	80	135	132	148	164	337	404	422	269	41	1000	165	318	364	240	253	42	243	216	207	230	345	236	284
OTU_329	Chordata	Actinopteri	Cypriniformes	Leuciscidae	Alburnus	Alburnus alburnus	98.246	Midori2	GCGGTTAAACGAGGGGCCCTAGTTAATAATACGCGGCGTAAAGGGTGGTTAAGGAAAGCATAACAATAAAGCCGAATGGCCCTTTGGCTGTCATACGCTTCTAGGTGTCCGAAGCCCAATATACGAAAGTAGCCTTAATAAGGCCCACCTGACCCCAAAAGCTGAGGAA	0	0	0	0	0	0	0	0	0	0	0	0	0	0	0	0	0	0	0	0	0	0	0	0	0	0	0	0	0	0	0	0	0	0	0	0	0	371
OTU_330	Chordata	Actinopteri	Gobiiformes	Gobiidae	Neogobius	Neogobius fluviatilis	97.516	Midori2	GCGGTTATACGAGAGGCCCAAGTTGACAAAGATCGGCGTAAAGCGTGGTTAATGATAGTTCCACTAAAGCCAAACACCTTCAAGTCTGTTATACGCCCCCGAAGACAGGAAGACCCATCACGAAAGTAGCTTTAATCTTCATGAACCCACGAAAGCTACGATA	0	0	0	0	0	0	0	0	0	5	0	0	0	0	0	0	0	0	0	0	962	0	8	0	0	0	3	0	0	2757	0	0	13	864	0	0	0	0
OTU_331	Chordata	Actinopteri	Perciformes	Gasterosteidae			96.97	Midori2	GCGGTTATACGAGAGGCCCAAGTTGATGAATTACGGCGTAAAGAGTGGTTAAGCTAAAATTAAAACTAAAGCCGAACACCCCCAAAGCTGTTATACGCACCCGGGGGTAAGAAGTTCAACCACGAAGGTGGCTTTATTAAACCTGAACCCACGAAAGCTACGGCA	0	0	46	0	0	0	0	0	0	0	0	0	0	0	0	0	0	0	0	0	0	60	0	0	0	0	17	0	0	0	0	0	0	0	0	0	0	0
OTU_332	Chordata	Mammalia	Primates	Hominidae			96.386	Midori2	GCGGTCACACGATTAACCCAAGTCAATAGAAACCGGCGTAAAGAGTGTTTTAGATCAATTCCCCTCAATAAAGCTAAAATTCACCTGAGTTGTAAAAAACTCCAGTTGACACAAAATAGACTACGAAAGTGGCTTTAACATATCTGAACACACAATAGCTAAGACC	0	0	0	0	0	0	0	0	0	0	0	0	0	0	0	0	1	0	0	0	0	0	0	0	0	0	0	0	0	0	0	0	0	0	0	0	0	0
OTU_333	Chordata	Actinopteri	Cypriniformes				96.45	Midori2	GCGGTTATACGAGAGGCCCTAGTTGATATTACAACGGCGTAAAGGGTGGTTAAGGATAAACAAAAATAAAGTCAAATGGCCCCTTGTCCGTCATACGCTTCTAGGAGTCCGGAGCCCTAATACGAAAGTAACTTTAATAAACCCTGACCCCACGAAAGCTGAGAAA	0	0	0	2	0	4	0	4	0	0	0	0	4	0	0	0	0	1	1	23	8	14	4	0	2	3	1	6	2	4	0	5	3	5	12	0	11	305
OTU_334	Chordata	Actinopteri	Gobiiformes	Gobiidae	Neogobius		96.988	Midori2	GCGGTTATACGAGAGGCCCAAGTTGACAAAAATCGGCGAAAAGCGTGGTTAGTGATATCACCTCCACTAAAGCCAAACACCTTCAGAGCTGTTATACGCATCCGAAGACAGGAAGCCCAATCACGAAAGTAGCTTTAATTTTCATGAAGCCACGAAAGCTAGGAAA	0	0	0	2	1	3	3	4	0	4	0	0	0	0	0	3	2	0	4	23	49	35	19	0	16	3	32	25	16	22	0	45	28	13	39	66	39	23
OTU_336	Chordata	Actinopteri	Gobiiformes	Gobiidae	Neogobius		96.988	Midori2	GCGGTTATACGAGAGGCCCAAGTTGACAAAAATCGGCGAAAACGTGGTTAGTGATATCACCTCCACTAAAGCCAAACACCTTCAAGGCTGTAATACGCCCCCGAAGGCAGGAAGCCCAATCACGACTAGCTTTAATTTTCATGAAGCCACGAAAGCTAGGAAA	3	1	0	2	0	4	0	1	0	0	0	0	0	3	1	0	4	0	0	0	0	0	0	0	0	3	0	1	0	0	1	0	4	873	0	3	0	4
OTU_337	Chordata	Actinopteri	Perciformes	Percidae	Perca		96.988	Midori2	GCTGTTATACGAGAGGCCCAAGTTGATAGACATCCGCGTAAAGCGTGGTTAAGATTAAACACAATACTAAAGCCGAACACCTTCAGAGCTGTTATACGCATCCGAAGGTAAGAAGTTCAACCACGAAAGTGGCTTTATTACCCCTGAACCCACGAAAGCTACGATA	0	0	0	0	0	0	0	0	0	0	0	0	0	0	0	0	0	0	0	4	0	7	0	0	0	0	7	0	0	101	0	0	0	0	9	0	1	0
OTU_338	Chordata	Actinopteri	Perciformes	Percidae	Sander		96.364	Midori2	GCGGTTATACGAGAGGCCCAAGTTGATAGACATCGGCGTAAAGCGTGGTTAAGACAAAAACAAAACTAAAGCCGAACACCCCCAAAGCTGTTATACGCATCCGAAGGTAAGAAGTTCAACCACGAAAGTGGCTTTATAGCCCCTGAACCCACGAAAGCTACGATA	0	4	9	7	12	7	4	10	3	10	4	0	7	4	7	3	4	10	11	30	63	66	41	0	28	18	57	39	34	60	0	44	40	66	58	119	108	49
OTU_339	Chordata	Actinopteri	Gobiiformes	Gobiidae	Neogobius		96.988	Midori2	GCGGTTATACGAGAGGCCCAAGTTGACAAAAATCGGCGAAAAGCGTGGTTAGTGATATCACCTCCACTAAAGCCAAACACCTTCAAGGCTGTAATACGCCCCCGAACACAGGAAGCCCAATCACGAATAGCTTTAATTTTCATGAAGCCACGAAAGCTGAGAAA	0	0	0	0	0	0	1	0	0	0	0	0	0	0	0	0	0	0	0	0	0	1	0	0	0	0	0	1	0	0	0	5	0	0	0	9	0	0
OTU_340	Chordata	Actinopteri	Cypriniformes	Leuciscidae	Abramis		95.93	Midori2	GCGGTTAAACGAGAGGCCCTAGTTAATAATACACGGCGTAAAGGGTGGTTAAGGAAAGCATAACAATAAAGCCGAATGGCCCTTTGGCTGTCATACGCTTCTAGGTGTCCGAAGTTCAACAAAAGTAGCTTTAATAACGCCCACCTGACCCCACGAAAGCTGAGAAA	44	26	52	39	7	58	76	18	24	12	36	20	30	37	50	46	22	53	75	70	78	92	59	0	50	35	60	74	11	79	0	57	92	78	110	168	72	109
OTU_341	Chordata	Actinopteri	Cypriniformes	Cyprinidae	Capoeta		96.471	Midori2	GCGGTTAGACGAGAGGCCCTAGTTGATATTATAACGGCGTAAAGGGTGGTTAGGGATAAATAATAATAAAGCCAAATGGCCCCTTGGCCGTCATACTTCTAGGTGTCCGAGGCCCTATATACGAAAGTAACTTTAATAAACCCACCTGACCCCACGAAAGCTGAGAAA	0	59	69	78	34	87	36	35	20	19	77	17	120	35	66	118	92	59	71	123	386	189	179	0	113	44	99	70	47	286	0	98	51	77	103	104	163	59
OTU_343	Chordata	Actinopteri	Cypriniformes	Leuciscidae	Rutilus		96.491	Midori2	GCGGTTAAACGAGAGGCCCTAGTTAATAATACACGGCGTAAAGGGTGGTTAAGGGAAGCACAATAATAAAGCCAAATGGCCCTTTGGCTGTCATACGCTTCTAGGTGTCCGAAGCCCAATATACGAAAGTAGCTTTAACATAATTAACCTGACCCCACGAAAGCTGAGAAA	0	14	98	28	22	31	47	31	35	51	30	14	45	63	34	59	55	49	79	72	19	36	28	0	22	38	30	24	50	49	50	159	24	45	55	54	82	37
OTU_345	Chordata	Actinopteri	Cypriniformes	Leuciscidae	Rutilus	Rutilus rutilus	97.661	Midori2	GCGGTTAAACGAGAGGCCCTAGTTAATAATACACGGCGTAAAGGGTGGTTAAGGGAAGCACAATAATAAAGCCGAATGGCCCTTTGGCTGTCATACGCTTCTAGGTGTCCGAAGCCCATACGAAAGTAGCTTTAATAAAGCCCACCTGACCCCACGAAAGCTGAGAAA	147	76	267	96	66	129	196	64	113	152	91	51	136	201	175	423	202	236	278	416	193	215	156	0	125	140	146	216	198	272	117	302	198	303	793	775	645	388
OTU_346	Chordata	Actinopteri	Perciformes	Percidae	Perca	Perca fluviatilis	99.367	Midori2	GCGGTTATACGAGAGGCCCAAGTTGATAGACATCGGCGTAAAGCGTGGTTAAGATTAAAGACAATACTAAAGCCGAACACCTTCAGAGCTGTTATACGCATCCGAAGGTAAGAAGTTCAACCACGAAAGTGGCTTTATAGCCCCTGAACCCACGACAGTTGAGGAA	0	9	2	5	4	10	7	0	5	5	2	0	5	2	3	6	5	4	0	25	32	48	22	4	15	14	28	51	20	25	0	29	15	16	23	43	26	18
OTU_347	Chordata	Actinopteri	Cypriniformes				95.882	Midori2	GCGGTTAGACGAGAGGCCCTAGTTGATATTACAACGGCGTAAAGGGTGGTGATAAACAAAAATAAAGTCAAATGGCCCCTTGGCCGTCATACGCTTCTAGGAGTCCGAAGCCCTAATACGAAAGTAGCTTTAATAACGCCCACCTGACCCCACGAAAGCTGAGAAA	0	0	0	1	0	3	0	0	0	0	0	1	1	0	2	3	3	3	3	5	15	5	5	0	4	0	2	27	2	11	0	4	8	1	23	12	3	4
OTU_348	Chordata	Actinopteri	Perciformes	Percidae	Sander		96.364	Midori2	GCGGTTATACGAGAGGCCCAAGTTGATAGACATCGGCGTAAAGCGTGGTTACAAAAACAAAACTAAAGCCGAACACCTTCAGAGCTGTTATACGCATCCGAAGGTAAGAAGTTCAACCACGAAAGTGGCTTTATAGCCCCTGAACCCACGAAAGCTACGATA	0	4	5	5	5	2	5	3	2	9	7	0	4	4	3	3	5	8	10	18	35	45	26	0	15	11	41	30	21	54	0	46	35	36	69	186	158	47
OTU_350	Chordata	Actinopteri	Cypriniformes	Leuciscidae	Leuciscus	Leuciscus leuciscus	97.076	Midori2	GCGTTTAAACGAGAGGCCCTAGTTAATAATACACGGCGTAAAGGGTGGCTAAGGAGAGCATAACAATAAAGCCGAATGGCCCTTCCGCTGTCATACGCTTCTAGGTGTCCGAAGCTCAATATACGAAAGTAGCTTTAATAAAGCCCACCTGACCCCACGAAAGCTGAGAAA	0	0	0	0	0	0	0	0	0	0	0	0	0	0	0	4	22	0	2	0	0	341	5	0	0	0	0	0	0	0	0	0	0	0	3	5	3	4
OTU_351	Chordata	Actinopteri	Perciformes	Percidae	Sander		96.97	Midori2	GCGGTTATACAGGCCCAAGTTGATAGACATCGGCGTAAAGCGTGGTTAAGACAAAAACAAAACTAAAGCCGAACACCTTCAGAGCTGTTATACGCACCCGAAGGTAAGAAGTTCAACCACGAAAGTGGCTTTATAGCCCCTGAACCCACGAAAGCTACGATA	0	0	12	12	6	14	8	13	1	20	7	0	11	7	8	4	4	4	13	53	81	98	47	0	30	70	128	86	44	92	0	104	113	128	117	299	150	66
OTU_352	Chordata	Actinopteri	Cypriniformes	Leuciscidae	Rutilus	Rutilus rutilus	97.661	Midori2	GCGGTTAAACGATAGGCCCTAGTTAATAATACACGGCGTAAAGGGTGGTTAAGGGAAGCACAATAATAAAGCCAAATGGCCCTTTCTGTCATACGCTTCTAGGTGTCCGAAGCCCAATATACGAAAGTAGCTTTAATAACGCCCACCTGACCCCACGAAAGCTGAGAAA	25	16	32	11	14	22	12	14	22	25	20	9	19	39	15	39	15	24	24	55	12	354	14	0	17	18	16	22	29	512	42	30	20	37	172	30	58	18
OTU_353	Chordata	Actinopteri	Cypriniformes				95.322	Midori2	GCGGTTAAACGAGAGGCCCTAGTTGATAATATTACGGCGTAAAGGGTGGTTAAGGAAAATAAATTAATAAAGTCAAATGGCCCCTTGGCCGTCATACGCTTCTAGGAGTCCGAAGCCCTAATACGAAAGTAACTTTAATAAACCCACCTGACCCCACGAAAGCTGAGAAA	0	0	0	0	0	0	0	0	0	0	0	0	0	0	0	0	13	0	0	0	0	0	0	0	0	0	0	0	0	0	0	122	0	0	0	0	0	0
OTU_355	Chordata	Actinopteri	Perciformes	Percidae	Perca	Perca fluviatilis	98.125	Midori2	GCGGTTATACGAGAGGCCCAAGTTGATAGACATCGGCGTAAAGCGTGGTTATTAAAGACAATACTAAAGCCGAACACCTTCAGAGCTGTTATACGCATCCGAAGGTAAGAAGTTCAACCACGAAAGTGGCTTTATAGCCCCTGAACCCACGAAAGCTGAGAAA	2	4	6	0	4	7	9	6	3	4	1	1	5	5	5	9	9	0	6	59	39	57	32	0	20	9	31	33	18	43	0	33	19	29	63	81	53	391
OTU_356	Chordata	Mammalia	Primates				86.792	Midori2	GTGATCATACGATTAACCCAAGCTAATAGATTTCGGCGTAAAGAGTGTTTAAGATCTATTTTCAATAAAGCTAAACTCCATCTAAGTTGTAAAAAACTCCAGCTGAAATAAAATATTACGAAAGTGGCTTTAATATTCTGAAGACACAACAGCTAAGACC	0	77	0	0	0	0	0	0	0	0	0	0	0	0	0	0	0	0	0	0	0	0	0	0	0	0	0	0	0	0	0	0	0	0	0	0	0	0
OTU_357	Chordata	Actinopteri	Gobiiformes	Gobiidae	Neogobius	Neogobius melanostomus	97.561	Midori2	GCGGTTATACGAGAGGCCCAAGTTGACAAAAATCGGCGAAAAGCGTGGTTAGTGATATCACCTCCACTAAAGCCAAACACCTTCAAGGCTGTAATACGCCCCCGAAGACAGGAAGCCCAATCACGATTAGCTTTAATTTTCATGAAGCCACGAAAGCTACGATA	15	12	24	20	15	15	13	32	19	17	11	12	12	7	11	22	16	22	25	47	93	80	42	0	43	44	82	74	74	872	2	67	87	50	84	328	92	63
OTU_358	Chordata	Actinopteri	Gobiiformes	Gobiidae	Neogobius	Neogobius melanostomus	97.576	Midori2	TCGGTTATACGAGAGGCCCAAGTTCACAAAAATCTGCGAAAAGCGTGGTTAGTGATATCACCTCCACTAAAGCCAAACACCTTCAAGGCTGTAATACGCCCCCGAAGACAGGAACCCCAATCACGAAATTAGCTTTAATTTTCATGAAGCCACGAAAGCTAGGAAA	0	0	0	0	0	0	0	0	0	0	0	0	0	0	0	0	0	0	0	0	0	0	0	0	0	0	0	0	0	0	0	0	0	0	1	0	0	0
OTU_359	Chordata	Actinopteri	Cypriniformes	Leuciscidae	Abramis		96.512	Midori2	GCGGTTATACGAGAGGCCCAAGTTGATAATACACGGCGTAAAGGGTGGTTAAGGAGAGCATAACAATAAAGCCGAATGGCCCTTTGGCTGTCATACGCTTCTAGGTGTCCGAAGTTCAACATACGAAAGTAGCTTTAATAACGCCCACCTGACCCCACGAAAGCTGAGAAA	42	64	109	98	38	106	105	90	67	32	49	55	51	42	38	72	113	59	79	262	198	281	159	2	161	70	176	167	110	202	23	187	185	130	338	704	241	209
OTU_360	Chordata	Actinopteri	Cypriniformes	Leuciscidae	Leuciscus		97.576	Midori2	GCGGTTAAACGAGAGGCCCCTAAATAATACACGGCGTAAAGGGTGGTTAAGGAAAGCATAACAATAAAGCCGAATGGCCCTTTGGCTGTCATACGCTTCTAGGTGTCCGAAGCCCAATATACGAAAGTAGCTTTAATAAAGCCCACCTGACCCCACGAAAGCTACGATA	0	0	0	0	0	1	0	1	0	0	0	0	0	0	0	1	1	0	0	0	0	6	1074	0	1	0	0	1	2	4	0	1	6	0	7	10	2	7
OTU_361	Chordata	Actinopteri	Gobiiformes	Gobiidae	Neogobius	Neogobius melanostomus	98.137	Midori2	GCGGTTATACGAGAGCCCAAGTTGACAAAAATCGGCGAAAAGCGTGGTTAGTGATGTCACCTCCACTAAAGCCAAACACCTTCAAGGCTGTAATACGCCCCCGAAGACAGGAAGCCCAATCACGAAAGTAGCTTTAATTTTCATGAGGCCACGAAAGCTAAAAA	2	1	0	6	0	0	0	4	5	3	1	3	0	1	1	0	0	2	0	0	0	2	13	0	2	0	21	0	6	0	1	2	0	60	0	0	1	3
OTU_362	Chordata	Actinopteri	Gobiiformes	Gobiidae	Neogobius	Neogobius melanostomus	97.576	Midori2	GCGGTTATACGAGATTATCAAGTTGACAAAAATCGGCGAAAAGCGTGGTTAGTGATATCACCTCCACTAAAGCCAAACACCTTCAAGGCTGTAATACGCCCCCGAAGACAGGAAGCCCAATCACGAAAGTAGCTTTAATTTTCATGAAGCCACGAAAGCTAGGAAG	0	0	0	0	0	0	0	0	0	0	0	1	0	0	0	0	1	0	0	0	1	1	2	0	0	2	0	0	0	0	0	1	0	0	0	0	2	2
OTU_363	Chordata	Actinopteri	Gobiiformes	Gobiidae	Neogobius	Neogobius melanostomus	98.802	Midori2	GCGGTTATACGAGAGGCCCAAGTTGACAAAAATCGGCGAAAAGCGTGGTTAGTGATATCACCTCCACTAAAAGCCAAACACCTCAAGGCTGTAATACGCCCCCGAAGACAGGAAGCCCAATCACGAAAGTAGCTTTAATTTTCATGAAGCCACGAAAGCTAGGAAA	0	0	0	0	0	0	0	0	0	0	0	0	0	0	0	0	0	0	0	0	0	0	1268	0	0	0	0	0	0	266	0	280	187	176	390	0	0	0
OTU_367	Chordata	Actinopteri	Perciformes	Percidae	Perca	Perca fluviatilis	98.125	Midori2	GCGGTTATACGAGAGGCCCAAGTTGATAGACATCGGCGTAAAGCGTGGTTAAGATTAAAGACAATACTAAAGCCGAACACCTTCAGAGCTGTTATACGCATCCGAAGGTAAGAAGTTCAACCACAAAAGTGGCTTTATAGCCCCCAACCCACGAAAGCTGAGAAA	0	5	1	4	0	0	3	0	0	2	3	0	1	0	0	0	0	1	0	23	7	5	31	0	12	3	10	13	7	8	0	4	556	6	18	41	10	4
OTU_368	Chordata	Actinopteri	Cypriniformes	Leuciscidae	Rutilus	Rutilus rutilus	97.059	Midori2	CGGTTAAACGACCCCCCAGTTAATAATACACGGCGTAAAGGGTGGTTAAGGGAAGCACAATAATAAAGCCAAATGGCCCTTTGGCTGTCATACGCTTCTAGGTGTCCGAAGCCCAATATACGAAAGTAGCTTTAATAAAGCCCACCTGACCCCACGAAAGCTGAGAAA	0	8	23	15	5	21	15	9	6	12	10	6	6	10	14	26	10	16	17	68	37	20	25	0	19	18	44	52	28	35	173	41	41	51	38	62	56	38
OTU_370	Chordata	Actinopteri	Perciformes	Gasterosteidae	Gasterosteus	Gasterosteus aculeatus	98.148	Midori2	GCGGTTATACGAGAGGCCCAAGTTGATGAATTACGGCGTAAAGAGTGGTTAAGCTAAAATTAAAACTAAATCCGAACACCCAAAAGCTGTTATACGCATCCGGAGGTGAGAAGTTCAACCACGAAGGTGGCTTTATCTAACCTGAACCCACGAAAGCTACGATA	0	0	0	0	0	0	0	0	0	0	0	0	0	0	0	0	0	0	0	0	0	0	1	0	0	0	0	0	0	0	0	2	0	0	2	0	0	0
OTU_371	Chordata	Actinopteri	Cypriniformes	Xenocyprididae	Ctenopharyngodon	Ctenopharyngodon idella	97.11	Midori2	GCGGTTAAACGAGGGCCCCAGTTGATAACACCACGGCGTAAAGGGTGGTTAAGGAAAGCAAAACAATAAAGCCGAATGGCCCTTTGGCTGTCATACGCTTCTAGGTGTCCGAAGCCCAATATACGAAAGTAGCTTTAATAAAGCCCACCTGACCCCACGAAAGCTGAGAAA	0	0	0	0	0	0	0	0	0	0	0	0	0	0	0	0	0	0	0	0	0	0	0	0	0	0	0	0	0	0	0	4	0	0	0	0	0	0
OTU_372	Chordata	Actinopteri	Anguilliformes	Anguillidae	Anguilla		96.407	Midori2	GCGGTTATACGAGAGGCTCAAATTGATATTACACGGCGTAAAGCGTGATTAAAAAACAAAACTAAAGCCAAACACTTCCCAAGCTCATACGCTACCGGAACATAAACGAAGCCCTATAACGAAAGTAGCTTTAACACCTTTGAACTCACGACAGTTGAGGAA	87	145	192	153	85	129	194	81	146	2833	116	99	183	126	179	147	190	94	121	319	1557	275	342	47	363	317	269	243	142	389	49	545	963	307	344	481	251	275
OTU_373	Chordata	Actinopteri	Cypriniformes	Leuciscidae	Leuciscus	Leuciscus aspius	97.661	Midori2	GCGGTTATACGAGAGGCCCTAGTTAATAATACACGGCGTAAAGGGTGGTTAAGGAAAGCATAACAATAAAGTCGAATGGCCCCTTGGCTGTCATACGCCTAGGTGTCCGAAGCCCAATATACGAAAGTAGCTTTAATAATGCCCACCTGACCCCACGAAAGCTGAGGAA	0	0	47	0	0	12	0	43	7	0	0	0	0	0	14	0	35	0	29	0	6	20	9	0	35	0	71	66	0	38	0	6	0	23	359	92	22	6
OTU_374	Chordata	Actinopteri	Cypriniformes	Leuciscidae	Leuciscus	Leuciscus aspius	98.246	Midori2	GCGGTTAAACGGGAGGCCCTAGTTAATAATACACGGCGTAAAGGGTGGTTAAGGAAAGCATAACAATAAAGTCGAATGGCCCCTTGGCTGTCGTACGCTTCTAGGTGTCCGAAGCCCGATATACGAAAGTAGCTTTAATAAGGCCCACCTGACCCCACGAAAGCTGAGGAA	0	0	1470	0	0	5	0	17	6	0	0	0	0	0	22	0	27	0	25	0	0	5	0	0	14	0	11	14	0	6	0	0	0	7	0	10	2	3
OTU_375	Chordata	Actinopteri	Perciformes	Percidae	Perca	Perca fluviatilis	98.148	Midori2	GCTTTATACGAGAGGCCCAAGTTGACAAAAATCGGCGTAAAGCGTGGTTAAGATTAAAGACAATACTAAAGCCGAACACCTTCAGAGCTGTTATACGCATCCGAAGGTAAGAAGTTCAACCACGAAAGTGGCTTTATAGCCCCTGAACCCACGAAAGCTACGATA	116	224	336	243	204	294	266	346	191	305	169	158	265	205	151	315	310	242	247	1049	973	829	735	85	623	434	931	716	683	809	65	953	838	720	933	1278	751	693
OTU_376	Chordata	Mammalia	Rodentia	Myocastoridae	Myocastor		96.951	Midori2	GCGGTCATACGATTAACTCTAATTAATAAACCCCGGCGTAAAGAGTATTAAAGATACAATAAAAATAAGATTAAATTTCATCTGGGTCGTAAAAAACTATAGATAAAAAATCGATAACGAAGGTAATCTTAATATATCAGAATATACTAAAGCTAAGACA	0	2	0	0	2	8	0	2	0	2	7	0	0	0	6	8	1	0	0	0	2	0	15	0	4	12	79	1	0	4	0	5	0	0	0	0	0	0
OTU_377	Chordata	Actinopteri	Cypriniformes	Leuciscidae	Abramis	Abramis brama	97.59	Midori2	GCGGTTAAACGAGAGGCCCCAGTTAATAATACACGGCGTAAAGGGTGGTTAAGGAAAGTATTAACAATAAAGCCGAATGGCCCTTTGGCTGTCATACGCTTCTAGGTGTCCGAAGTTCAACAAAAGTAGCTTTAATAACGCCCACCTGACCCCACGAAAGCTACGATA	1	0	11	8	4	8	3	2	0	5	2	0	2	3	1	3	4	9	6	20	35	42	11	0	19	0	19	22	10	25	3	30	367	26	16	45	14	37
OTU_378	Chordata	Actinopteri	Perciformes	Percidae			92.683	Midori2	GCGGTTATACGAGAGGCCCAAGTTGACAAAAATCGGCGAAAAGCGTGGTTAAGATTAAAGACAATACTAAAGCCGAACACCTTCAGAGCTGTTATACGCATCCGAAGGTAAGAAGTTCAACCACGAAAGTGGCTTTAATTTTCATGAAGCCACGAAAGCTAGGAAA	6	31	25	17	23	19	18	35	8	29	16	8	17	15	17	42	34	13	24	559	501	574	317	11	142	42	535	428	214	404	0	394	369	280	604	997	426	310
OTU_379	Chordata	Actinopteri	Cypriniformes				95.266	Midori2	GCGGTTAGACGGCCCTAGTTGATATTATAACGGCGTAAAGGGTGGTTAGGGATAAATAATAATAAAGTCAAATGGCCCCTTGGCCGTCATACGCTTCTAGGAGTCCGAAGCCCTAATACGAAAGTAACTTTAATAAACCCACCTGACCCCACGAAAGCTGAGAAA	0	27	35	60	25	49	31	14	16	9	48	15	64	20	45	63	41	35	37	72	249	109	118	0	71	22	50	36	19	158	5	53	35	34	50	38	144	33
OTU_380	Chordata	Actinopteri	Perciformes	Percidae	Sander		96.97	Midori2	GCGGTTATACGAGAGGCCCAAGTTGATAGACATCGGCGTAAAGCGTGGTTAAGACAAAAACAAAACTAAAGCCGAACACCTTCAGAGCTGTTATACGCACCCGAAGGTAAGAAGTTCAACCACGAAAGTGGCTTTATAGCCCCTGAACCCAAAGCTACGATA	0	84	331	560	233	415	434	617	163	842	313	65	341	275	279	228	333	662	586	1907	2838	3955	2405	0	1540	1100	3284	2496	2314	2718	0	3397	3243	3561	3975	6757	6161	2236
OTU_381	Chordata	Actinopteri	Cypriniformes	Leuciscidae	Leuciscus	Leuciscus aspius	98.246	Midori2	GCGGTTAAACGAGGGGCCCTAGTTAGTAATACACGGCGTAAAGGGTGGTTAAGGAAAGCATAACAATAAAGTCGAATGGCCCCTTGGCTGTCATACGCTTCTAGGTGTCCGAAGCCCAATATACGAAAATAGCTTTAATAAGGCCCACCTGACCCCACGAAAGCTGAGGAA	0	0	20	0	0	10	0	18	4	0	0	0	0	0	26	0	19	0	601	0	0	7	2	0	22	0	11	11	0	7	0	3	0	3	0	16	5	0
OTU_382	Chordata	Actinopteri	Gobiiformes	Gobiidae	Neogobius		96.933	Midori2	GCGGTTATACGAGAGGCCCAAGTTGACAAAAATCGGCGAAAAGCGTGGTTAGTGATAGTTCCACTAAAGCCAAACACCTTCAAGGCTGTTATACGCCCCCGAAGACAGGAAGACCCATCACGAAAGTAGCTTTAATCTTCATGAACCCACGAAAGCTAGGAAA	0	0	0	0	0	0	0	0	0	32	0	0	0	0	0	0	0	11	0	19	50	0	61	0	0	52	26	0	0	129	0	0	180	38	24	40	0	0
OTU_383	Chordata	Actinopteri	Gobiiformes	Gobiidae	Neogobius		96.988	Midori2	TCGGTTATACGAGAGGCCCAAGTTGACAAAAAATCTGCGAAAAGCGTGGTTAGTGATATCACCTCCACTAAAGCCAAACACCTTCAAGGCTGTAATACGCCCCCGAAGACAGGAAGCCCAATCAAAAGTAGCTTTAATTTTCATGAAGCCACGAGAGCTAGGAAA	0	1	2	1	0	0	0	1	0	1	2	0	1	0	1	0	0	0	1	2	0	11	800	2	7	26	2	5	1	11	0	4	7	8	4	12	5	12
OTU_384	Chordata	Actinopteri	Perciformes	Percidae	Perca	Perca fluviatilis	98.125	Midori2	GCGGTTATACGACGCCCAAGTTGATAGACATCGGCGTAAAGCGTGGTTAAGATTAAAGACAATACTAAAGCCGAACACCTTCAGAGCTGTTATACGCATCCGAAGGTAAGAAGTTCAACCACGAAAGTGGCTTTATAGCCCCTGAACCCACGAAAGCTGAGAAA	3	3	6	6	2	6	12	7	6	4	1	1	2	0	4	7	3	6	9	68	52	66	23	0	15	4	54	34	31	39	0	38	32	26	509	87	58	68
OTU_385	Chordata	Actinopteri	Gobiiformes	Gobiidae	Neogobius		96.951	Midori2	GCGGTTATACGAGAGGCCCAAGTTGACAAAAATCGGCGAAAAGCGTGGTTAGTGATATCACCTCCACTAAAGCCAAACACCTTCAAGGCTGTAATACGCCCCCGAACACAGGACCCCAATCACGAAAGTAGCTTTAATTTTCATGAACCCACGAAAGCTACGATA	0	1	7	4	3	3	2	4	1	6	3	2	3	2	2	4	4	3	4	11	18	18	14	0	18	12	24	19	26	16	0	13	15	18	24	21	659	13
OTU_387	Chordata	Actinopteri	Cypriniformes	Leuciscidae	Leuciscus		96.512	Midori2	GCGGTTATACGAGAGGCCCAAGTTGACAATACACGGCGTAAAGGGTGGTTAAGGAAAGTATTAACAATAAAGCCGAATGGCCCTTTGGCTGTCATACGCTTCTAGGTGTCCGAAGCCCAATATACGAAAGTAGCTTTAATAAAGCCCACCTGACCCCACGAAAGCTGAGAAA	51	27	30	37	9	74	55	26	23	14	37	18	21	20	23	90	134	48	68	161	96	141	59	0	56	36	112	109	86	95	0	131	110	120	403	612	215	190
OTU_388	Chordata	Actinopteri	Cypriniformes	Leuciscidae	Squalius	Squalius cephalus	97.076	Midori2	GCGGTTATACGAGAGGCCCAAGTTAATAATACACGGCGTAAAGGGTGGTTAAGGAAAACATAACAATAAAGCAAATGGCCCTTTGGCTGTCATACGCTTCTAGGTGTCCGAAGCCCAATATACGAAAGTAGCTTTAATAAAGTCCACCTGACCCCACGAAAGCTGAGAAA	0	107	66	91	86	118	80	136	100	77	39	84	63	80	83	159	89	86	63	160	136	43	174	0	998	102	123	95	112	208	0	126	113	110	263	222	279	117
OTU_389	Chordata	Actinopteri	Cypriniformes				96.471	Midori2	GCGGTTAGACGAGAGGCCCTAGTTGATATTACAACGGCGTAAAGGGTGGTTAAGGATAAACAAAAATAAAGTCAAATGGCCCCTTGGCCGTCATACGCTTCTAGGAGTCCGAAGCCCTAATACGAAAGTAGCTTTAGTACCGCCCACCTGACCCCACGAAAACTGAGAAA	0	0	7	5	0	6	11	0	2	0	7	3	0	2	8	20	0	8	4	13	8	11	3	3	4	0	6	2	2	8	0	3	7	5	9	16	13	7
OTU_390	Chordata	Actinopteri	Perciformes	Percidae	Perca	Perca fluviatilis	100	Midori2	GCGTACGAGAGGCCCAAGTTGATAGACATCGGCGTAAAGCGTGGTTAAGATTAAAGACAATACTAAAGCCGAACACCTTCAGAGCTGTTATACGCATCCGAAGGTAAGAAGTTCAACCACGAAAGTGGCTTTATAGCCCCTGAACCCACGAAAGCTACGGCA	0	16	7	7	4	6	8	11	9	9	11	4	2	4	3	10	9	8	6	23	1118	43	47	5	29	17	51	71	17	58	10	45	19	29	84	75	40	23
OTU_391	Chordata	Actinopteri	Cypriniformes	Leuciscidae	Leuciscus		96.491	Midori2	GCTGTTAAACGAGAGGCCCTAGTTAATAATACACGGCGTAAAGGGTGGTTAAGGAAAACATAACAATAAAGCCGAATGGCCCTTTGGCTTCATACGCTTCTGTGTCCGAAGCCCAATATACGAAAGTAGCTTTAATAACGCCCACCTGACCCCACGAAAGCTGAGAAA	0	7	3	8	7	11	7	7	1	2	8	8	4	6	9	13	6	4	10	11	33	8	57	0	21	10	12	7	5	31	0	35	329	18	12	13	40	11
OTU_392	Chordata	Actinopteri	Cypriniformes	Leuciscidae			97.093	Midori2	GCGGTTAGACGAGAGGCCCTAGTTGATATTACAACGGCGTAAAGGGTGGTTAAGGAAAGTATAACGATAAAGCCGAATGGCCCTTTGGCTGTCATACGCTTCTAGGTGTCCGAAGTCCAATATACGAAAGTAGCTTTAATAGAGCCCACCTGACCCCACGAAAGCTGAGAAA	0	0	6	1	0	4	12	0	0	0	5	3	8	0	0	13	4	3	2	13	12	15	2	0	18	0	0	6	2	38	0	9	3	4	24	18	10	5
OTU_393	Chordata	Actinopteri	Gobiiformes	Gobiidae	Ponticola		96.951	Midori2	GCGGTTATACGAGAGGCCCAAGTTGACAAACATTCGGCGTAAAGCGTGGTTAATAACTTACTAAAGCCAAACACCTTTAAGGCTGTTATACGCCCCCAAAGGTAGGAAGACCCCTCACGAAAGTAGCTTTAATTACTATGAATCCACGAAAGCTAGGAAA	0	355	188	117	81	194	152	257	175	149	326	39	116	183	104	184	134	199	241	589	635	583	418	0	437	135	699	461	350	704	0	401	147	861	777	164	352	381
OTU_394	Chordata	Actinopteri	Perciformes	Percidae	Perca	Perca fluviatilis	98.765	Midori2	GCTTTATACGAGGGGCCCAATTTGATAGACATCGGCGTAAAGCGTGGTTAAGATTAAAGACAATACTAAAGCCGAACACCTTCAGAGCTGTTATACGCATCCGAAGGTAAGAAGTTCAACCACGAAAGTGGCTTTATAGCCCCTGAACCCACGAAAGCTACGATA	4	2	2	3	0	0	0	5	6	2	1	0	6	1	0	2	6	3	2	5	18	8	14	0	7	4	3	3	20	29	0	580	3	6	13	8	2	2
OTU_395	Chordata	Actinopteri	Perciformes	Gasterosteidae	Gasterosteus		96.97	Midori2	GCGGTTATACGAGAGGCCCAAGTTGATGAATTACGGCGTAAAGAGTGGTTAAGCTAAAATTAAAACTAAAGCCGAACACCCCCAAAGCTGTTATACGCATCCGGAGGTGAGAAGTTCAACCACGAAGGTGGCTTTATCCAACCCCCCCACGAAAGCTACGGCA	0	6	2	1	6	4	1	1	4	3	4	2	2	0	0	2	4	2	3	0	2	0	7	41	2	0	443	3	0	2	5	3	1	0	1	1	0	0
OTU_396	Chordata	Actinopteri	Cypriniformes	Leuciscidae			96.532	Midori2	GCGGTTAAACGAGAGGCCCCAGTTAATAATACACGGCGTAAAGGGTGGTTAAGGAAAGTATTAACAATAAAGCCGAATGGCCCTTTTGGCTGTCATACGCTTAGGTGTCCGAAGCCCAATATACGAAAGTAGCTTTAATAAAGCCCACCTGACCCCACGAAAGCTGAGAAA	51	18	134	103	30	80	61	18	57	14	52	14	74	43	37	98	65	60	118	238	110	171	107	0	98	34	61	124	88	134	12	117	82	159	231	474	282	140
OTU_397	Chordata	Actinopteri	Perciformes	Percidae	Perca		96.988	Midori2	GCGGTTAAACGAGGCCCCAGTTAATAGACATCGGCGTAAAGCGTGGTTAAGATTAAAGACAATACTAAAGCCGAACACCTTCAGAGCTGTTATACGCATCCGAAGGTAAGAAGTTCAACCACGAAAGTGGCTTTATAGCCCCTGAACCCACGAAAGCTACGATA	143	230	378	323	180	382	298	296	171	172	155	142	202	155	128	336	297	206	381	826	642	793	474	53	515	249	437	399	286	543	79	471	410	369	656	1013	520	694
OTU_398	Chordata	Actinopteri	Anguilliformes	Anguillidae	Anguilla		96.407	Midori2	GCGGTTATACGAGGGGCTCAAATTGATATTACACGGCGTAAAGCGTGATTaaaaaaaaaCTAAAGCCAAACACTTCCCAAGCTGTCATACGCTACCGGAACATAAACGAAGCCCTATAACGAAAGTAGCTTTAATACCTTTGAACTCACGACAGTTGAGGAA	13	17	20	15	7	25	16	2443	13	12	13	5	24	11	26	15	10	7	17	16	50	19	26	0	14	30	756	10	11	32	17	18	22	17	20	32	15	15
OTU_399	Chordata	Actinopteri	Perciformes	Percidae	Perca	Perca fluviatilis	98.125	Midori2	GCGGTTATACGAGAGGCCCAAGTTGATAGACATCGGCGTAAAGCGTGGTTAAGATTAAAGACAATACTAAAGCCCACCTTCAGAGCTGTTATACGCATCCGAAGGTAAGAAGTTCAACCACGAAAGTGGCTTTATAGCCCCTGAACCCACGAAAGCTGAGAAA	3	2	4	7	1	5	3	7	0	4	0	6	3	2	3	8	8	1	7	21	33	451	14	0	6	5	29	31	17	21	0	26	21	26	50	61	29	22
OTU_401	Chordata	Actinopteri	Gobiiformes	Gobiidae	Neogobius	Neogobius melanostomus	97.576	Midori2	TCGGTTATACGAGAGGCCCAAGTTGACAAAAATCGGAAAAAGCGTGGTTAGTGATATCACCTCCACTAAAGCCAAGCACCTTCAAGGCTGTAATACGCCCCCGAAGACAGGAAGCCCAATCACGAAAGTAGCTTTAATTTTCATGAATCCACGAAAGCTAGGAAA	0	1	0	1	0	0	0	0	0	0	2	2	0	0	0	0	0	0	0	4	0	2	9	0	2	0	6	289	0	18	0	0	7	2	4	3	5	3
OTU_403	Chordata	Actinopteri	Gobiiformes	Gobiidae	Neogobius	Neogobius melanostomus	98.75	Midori2	GCGGTTATACGAGAGGCCCAAGTTGACAAAAATCGGCAAAAAGCGTGGTTAGTGATATCACCTCCACTAAAGCCAAACACCTTCAAGGCTGTAATACGCCCCCGAAGACGGAAGCCCAATCACGAAAGTAGCTTTAATTTTCATGAAGCCACGAAAGCTGAAA	8	7	0	5	6	9	0	4	1	7	6	5	3	3	3	8	5	4	3	18	4	17	0	0	145	0	12	12	10	11	131	24	35	20	11	21	21	5
OTU_404	Chordata	Actinopteri	Perciformes	Percidae	Perca		96.951	Midori2	GCGGTTATACGAGAGGCCCAAGTTGATAGACATCGGCGGCGTGGTTAAGATTAAAGACAATACTAAAGCCGAACACCTTCAGAGCTGTTATACGCATCCGAAGGTAAGAAGTTCAACCACGAAAGTGGCTTTATAGCCCCTGAACCCACGAAAGCTAGGAAA	4	6	6	4	6	2	4	9	7	13	3	3	4	10	4	10	8	4	4	43	25	24	23	0	10	7	523	30	19	24	0	26	27	19	44	38	19	19
OTU_405	Chordata	Mammalia	Rodentia	Cricetidae	Microtus	Microtus arvalis	98.742	Midori2	GCGGTCATACGATTAACCCAAACTAATTATTCTCCGCGTAAAACGTGTTACTAGAAATATGCAAAATAGAATTAAAATCCATCCAATATGTGAAAATTCATCGCTGGACCTAAAACCAATGACGAAAGTAATTCTAATAAGCCTGATACACGAAAGCTAGGAAA	0	0	0	0	0	0	0	0	0	0	0	8	0	67	0	0	0	0	12	0	5	0	7	0	0	25	0	18	4	0	0	22	279	309	0	9	5	32
OTU_406	Chordata	Actinopteri	Cypriniformes	Leuciscidae			96.512	Midori2	GCGTTTAAACGAGAGGCCCCAGTTAATAATACACGGCGTAAAGGGTGGTTAAGGAAAGTATTAACAAAAGCCGAATGGCCCTTTGGCTGTCATACGCTTCTAGGTGTCCGAAGCCCAATATACGAAAGTAGCTTTAATAAAGCCCACCTGACCCCACGAAAGCTGAGAAA	47	35	71	64	24	59	99	36	27	17	47	39	42	47	23	97	55	61	92	165	124	119	71	0	89	20	116	131	26	150	2	85	56	87	184	370	120	139
OTU_407	Chordata	Actinopteri	Gobiiformes	Gobiidae	Neogobius	Neogobius melanostomus	98.758	Midori2	TCGGTTATACGAGAGGCCCAAGTTGACAAAAATCGGCGAAAAGCGTGGTTAGTGATATCACCTCCACTAAAGCAAAACACCTTCAAGGCTGTAATACGCCCCCGAAGACAGGAAGCCCAATCACGAAAGTAGCTTTAATTTTCATGAAGCCACGAGAGCTAGTAGA	0	0	0	0	0	0	0	0	0	0	0	0	0	0	0	0	0	0	0	22	25	272	21	0	20	50	18	23	9	23	0	13	12	20	22	138	27	16
OTU_408	Chordata	Actinopteri	Pleuronectiformes	Pleuronectidae	Platichthys	Platichthys flesus	98.75	manual check	GCGGTTATACGAGAGGCCCAAGTTGAAAACAACGGCGTAAAGAGTGGTTAGGGGTTTTACTAAACTAGAGCCGAACGCTTTCAAAGCTGTTATACGCACCCGAAAGTATGAAACCCAATTACGAAAGTAGCTCTACCTATCCTGAACCCACGAAAGCTACGATA	0	0	0	0	0	0	0	0	0	0	0	0	0	0	0	0	0	0	0	0	0	0	0	0	0	0	2	0	0	0	0	0	0	0	0	0	0	5
OTU_409	Chordata	Actinopteri	Gobiiformes	Gobiidae	Neogobius	Neogobius melanostomus	97.561	Midori2	GCGGTTATACGAGAGGCCCAAGTTGACAAAAATCGGCGAAAAGCGTGGTTAGTGATATCACCTCCACTAAAGCCAAACACCTTCAACTGTAATACGCCCCCGAAGACAGGAAGCCCAATCACGAAAGTAGCTTTAATTTTCATGAATCCACGAAAGCTACGATA	0	5	0	3	0	2	2	0	0	3	2	2	2	0	0	3	0	0	0	31	18	337	23	0	22	8	36	13	40	34	0	15	16	27	28	51	23	25
OTU_413	Chordata	Actinopteri	Perciformes	Percidae	Sander		96.97	Midori2	GCGGTTATACGAGAGGCCCAAGTTGACAAAAATCGGCGTAAAGCGTGGTTAAGACAAAAACAAAACTAAAGCCGAACACCTTCAGAGCTGTTATACGCACCCGAAGGTAAGAAGTTCAACCACGAATTGGCTTTATTACCCCTGAACCCACGAAAGCTACGATA	0	7	23	50	31	45	33	50	20	29	26	14	22	35	22	11	34	50	34	82	80	110	72	0	56	53	159	91	46	91	0	117	141	156	105	203	171	109
OTU_414	Chordata	Actinopteri	Cypriniformes	Cyprinidae	Capoeta		95.906	Midori2	GCGGTTAGACGATAGGCCCTAGTTGATATTATAACGGCGTAAAGGGTGGTTAGTATAAATAATAATAAAGCCAAATGGCCCCTTGGCCGTCATACGCTTCTAGGTGTCCGAGGCCCTATATACGAAAGTAGCTTTAATAACGCCCACCTGACCCCACGAAAGCTGAGAAA	0	22	9	19	7	15	6	2	4	5	6	2	8	2	7	9	8	2	5	34	94	23	55	0	13	25	17	8	2	38	0	8	9	16	5	23	13	10
OTU_415	Chordata	Actinopteri	Perciformes	Percidae	Perca		96.386	Midori2	GCGGTTATACGAGAGGCCCAAGTTGATAGACATCGGCGTAAAGCGTGGTTAAGATTAAAGACAATACTAAAGCCGAACACCCCCAAAGCTGTTATACGCACCCGAAGGTAAGAAGTTCAACCACGAAAGTGGCTTTATTACCCCTGAACCCACGAAAGCTACGATA	0	1	7	13	8	8	2	14	0	22	12	0	9	10	9	1	5	17	13	22	33	43	35	0	26	16	59	30	22	55	0	51	41	57	50	81	103	33
OTU_416	Chordata	Actinopteri	Gobiiformes	Gobiidae	Neogobius	Neogobius melanostomus	97.561	Midori2	GCGGTTATACGACAGGCCCAAGTTGACAAAAATCGGCGAAAAGCGCGGTTAGTGATATCACCTCCACTAAAGCCAAACACCTTCAAGGCTGTAATACGCCCCCGAAGACAGGAAGCCCAATCACGAAAGTAGCTTTAATTTTCATGAAGCCAAAAGCTAGGAGA	0	0	0	0	0	0	0	0	0	0	0	0	0	0	0	0	0	0	0	6	0	0	1	0	0	0	0	0	0	0	0	1	0	0	2	0	0	0
OTU_417	Chordata	Actinopteri	Cypriniformes	Leuciscidae	Leuciscus		96.512	Midori2	GCGGTTAAACGAGAGGCCCCAGTTAATAATACACGGCGTAAAGGGTGGTTAAGGAAAGTATTAACAATAAAGCCGAATGCCCCTTTGGCTGTCATACGCTTCTAGGTGTCCGAAGCCCAATATACGAAAGTAGCTTTAATAAAGCCCACCTGCCCCACGGAAGCTGAGAAA	1	0	6	0	0	3	4	0	1	2	0	1	1	2	1	6	0	3	5	4	6	13	0	0	5	0	3	3	0	3	0	4	1	4	5	15	8	382
OTU_418	Chordata	Actinopteri	Perciformes	Percidae	Perca	Perca fluviatilis	98.125	Midori2	GCGGTTATACGAGAGGCCCAAGTTGATAGACATCGGCGTAAAGCGTGGTTAAGATTAAAGACAATAAAGCCGAACACCTTCAGAGCTGTTATACGCATCCGAAGGTAAGAAGTTCAACCACGAAAGTGGCTTTATAGCCCCTGAACCCACGAAAGCTGAGAAA	3	2	10	2	6	5	8	11	4	0	2	5	3	9	6	16	8	4	9	59	65	56	38	0	33	6	31	44	23	36	0	25	31	25	65	116	46	32
OTU_420	Chordata	Actinopteri	Cypriniformes				96.45	Midori2	GCGGTTAGACGAGAGGCCCTAGTTGATATTACAACGGCGTAAAGGGTGGTTAAGGATAAAAATAAAGTCAAATGGCCCCTTGGCCGTCATACGCTTCTAGGAGTCCGAAGCCCTAATACGAAAGTAACTTTAATAAACCCACCTGACCCCACGAAAGCTAGGAAA	0	5	9	4	1	21	7	11	2	4	7	14	10	14	12	21	7	17	12	11	20	38	19	0	61	12	10	2	5	35	4	21	10	8	34	14	32	17
OTU_421	Chordata	Actinopteri	Anguilliformes	Anguillidae	Anguilla		96.429	Midori2	GCGGTTATACGAGGGGCTCAAATTGATATTACACGGCGTAAAGCGTGATTaaaaaacaaaaaaaaCTAAAGCCAAACACTTCCCTGTCATACGCTGCCGGAACATAAACGAAGCCCTATAACGAAAGTAGCTTTAACACCTTTGAACTCACGACAGTTGAGGAA	0	0	0	0	0	0	0	0	0	0	0	0	0	0	0	0	2	0	0	0	0	0	0	0	1	0	0	1	0	2	0	2	99	5	5	0	0	0
OTU_423	Chordata	Actinopteri	Cypriniformes	Leuciscidae	Leuciscus		95.93	Midori2	GCGGTTAGACGAGAGGCCCTAGTTGATATTACAACGGCGTAAAGGGTGGTTAAGGAGAGCATAACAAAAAGCCGAATGGCCCTTTGGCTGTCATACGCTTCTAGGTGTCCGAAGCCCAATATAAAAGTAGCTTTAATAAAGCCCACCTGACCCCACGAAAGCTGAGAAA	0	0	10	13	0	24	34	0	10	0	22	17	21	8	13	84	110	37	57	49	29	30	46	0	20	4	24	20	15	43	0	54	16	22	451	378	180	83
OTU_426	Chordata	Actinopteri	Perciformes	Percidae	Perca		96.988	Midori2	GCGGTTATACGAGAGGCCCAAGTTGATAGACATCGGCGTAAAGCGTGGTTAAGATTAAAGACAATACTAAAGCCGAACACCTTCAGAGCTGTTATATGCATCCGAAGGTAAGAAGTTTAATTACGAAAGTGGCTTTATAGCCCCCGAACCCACGAAAGCTACGATA	2	0	0	0	0	1	1	0	0	4	2	0	0	0	1	4	0	4	0	1	3	7	2	3	5	5	9	5	6	0	1	3	1	2	0	4	4	250
OTU_427	Chordata	Actinopteri	Perciformes	Percidae	Perca		96.988	Midori2	GCGGTTATACGAGAGGCCCAAGTTGATAGACATCGGCGTAAAGCGTGGTTAAGACAAAAACAATACTAAAGCCGAACACCTTCAGCTGTTATACGCATCCGAAGGTAAGAAGTTCAACCACGAAAGTGGCTTTATAGCCCCTGAACCCACGAAAGCTACGATA	0	6	21	21	23	28	32	25	7	37	17	6	25	19	13	3	16	45	36	179	230	363	227	0	112	38	301	243	144	229	0	291	288	318	361	646	674	201
OTU_428	Chordata	Actinopteri	Gobiiformes	Gobiidae	Neogobius	Neogobius melanostomus	97.531	Midori2	GCTTTATACGAGAGGCCCAAGTTGACAAAAATCGGCGAAAAGCGTGGTTAGTGATATCACCTCCACTAAAGCCAAACACCTTCAAGGCTGTAATACGCCCCCGAAGACAGGAAGCCCAATCACGAAAGTAGCTTTAATTACTATGAATCCACGAAAGCTAGGAAA	0	385	231	92	114	205	145	245	161	115	361	33	108	194	102	187	127	192	262	899	1076	1150	663	0	492	108	924	685	369	1126	0	456	245	1211	1284	453	628	458
OTU_430	Chordata	Actinopteri	Cypriniformes	Leuciscidae	Rutilus	Rutilus rutilus	97.661	Midori2	GCGGTTAAACGAGAGGCCCCAGTTAATAATACACGGCGTAAAGGGTGGTTAAGGGAAGCACAATAATAAAGCCAAATCAACCTTTGGCTGTCATACGCTTCTAGGTGTCCGAAGCCCAATATACGAAAGTAGCTTTAATAAAGCCCACCTGACCCCACGAAAGCTGAGAAA	0	11	19	8	0	16	14	5	7	7	10	3	9	10	18	15	8	9	25	85	17	91	15	0	67	5	20	19	28	310	4	45	61	58	70	39	26	16
OTU_432	Chordata	Actinopteri	Cypriniformes	Leuciscidae	Leuciscus		95.322	Midori2	GCGGTTAAACGCAGGCCCTAGTTAATAATACACGGCTTAAAGGGTGGTTAAGGAAAACATAACAATAAAGCCGAATGGCCCTTTGGCTGTCATACGCTTCTAGGTGTCCGAAGCCCAATATACGAAAGTAGCTTTAATTAACCCGCCTGACCCCACGAAAACTGAGAAA	0	154	29	78	25	71	31	44	33	23	47	10	55	20	59	98	68	45	44	142	400	92	178	0	61	51	64	73	29	177	0	50	40	72	95	138	255	33
OTU_433	Chordata	Actinopteri	Cypriniformes				95.882	Midori2	GCGGTTAGACGAGAGGCCCTAGTTGATATTACAACGGCGTAAAGGGTGGTTAAGGATAAAAATAAAGTCAAATGGCCCCTTGGCCGTCATACGCTTCTAGGAGTCCGAAGCCCTAATACGAAAGTAGCTTTAATAACGCCCACCTGACCCCACGAAAGCTGAGAAA	0	11	5	2	4	16	8	7	7	5	3	8	4	7	5	16	2	5	6	26	22	51	33	0	10	9	12	16	8	26	0	24	13	7	77	26	23	13
OTU_434	Chordata	Actinopteri	Cypriniformes				95.266	Midori2	GCGGTTAAACGAGAGGCCCTAGTTAATAATACACGGCGTAAAGGGTGGTTAAGGATAAACAAAAATAAAGTCAAATGGCCCCCCGTCATACGCTTCTAGGAGTCCGAAGCCCTAATACGAAAGTAACTTTAATAAACCCACCTGACCCCACGAAAGCTGAGAAA	0	2	0	0	0	2	5	2	4	0	0	1	0	4	1	9	6	4	7	12	6	20	13	0	15	0	4	1	5	9	0	10	6	8	27	19	8	17
OTU_435	Chordata	Actinopteri	Gobiiformes	Gobiidae	Neogobius		96.988	Midori2	GCGGTTATACGAGAGGCCCAAGTTGACAAAAATCGGCGAAAAGCGTGGTTAGTGATATCACCTCCACTAAAGCCAAACACCTTCAAGGCTGTAATACGCCCCCGAAGACAGGAAGCCCAATCACGAAAGTAGCTTTAATTTTCATGACCCCACGAAAACTGAGAAA	35	90	66	83	45	78	53	65	59	35	34	42	40	49	66	68	74	49	59	76	62	53	50	19	49	32	44	35	16	46	19	55	46	42	67	110	51	56
OTU_436	Chordata	Actinopteri	Perciformes	Percidae	Perca	Perca fluviatilis	98.125	Midori2	GCTGTTATACGAGAGGCCCAAGTTGATAGACATCCGCGTAAAGCGTGGTTAAGATTAAACACAATACTAAAGCCGAACACCTTCAGAGCTGTTATACGCATCCGAAGGTAAGAAGTTCAACCACGAAAGTGGCTTTATAGCCCCTGAACCCACGAAAGCTGAGAAA	0	0	0	0	0	0	0	0	0	0	0	0	0	0	0	0	0	0	0	1	4	0	0	0	0	0	6	4	2	1077	0	5	2	0	6	5	7	0
OTU_437	Chordata	Actinopteri	Cypriniformes	Leuciscidae	Squalius		95.906	Midori2	GCGGTTAAACGAGAGGCCCTAGTTAATAATACACGGCGTAAAGGGTGGTTAAGGAAAACATAACAATAAAGCCGAATGGCCCTTTGGCTGTCATACGCTTCTAGGTGTCCGAAGCCCAATATACGAAAGTAGCTTTAACAAAATTTGCCTGACCCCACGAAAGCTAAGGAA	0	0	0	0	1	6	0	49	0	0	0	0	0	0	0	0	2	0	0	0	0	0	0	0	0	0	0	0	0	0	0	9	0	0	0	0	0	0
OTU_438	Chordata	Actinopteri	Cypriniformes	Leuciscidae			94.767	Midori2	GCGGTTAAACGAGAGGCCCCAGTTAATAATACACGGCGTAAAGGGTGGTTAGGGATAAATAATAATAAAGCCAAATGGCCCCTTGGCCGTCATACGCTTCTAGGTGTCCGAAGTTCAACATACGAAAGTAGCTTTAATAACGCCCACCTGACCCCACGAAAGCTGAGAAA	0	5	0	10	0	7	4	1	4	0	4	2	10	3	1	7	4	4	7	21	50	28	17	0	10	0	7	15	3	17	0	12	8	9	16	20	19	5
OTU_440	Chordata	Actinopteri	Cypriniformes	Cyprinidae			96.45	Midori2	CCGGTTAGACGAGAGGCCCTAGTTGATATTATAACGGCGTAAAGGGTGGTTAGGGATAAATAATAATAAAGCCAAATGGCCCCTTGCCGTCATACGCTTCTAGGTGTCCGAGGCCCTATATACGAAAGTAGCTTTAATTAACCCTGACCCCACGAAAGCTGAGAAA	0	117	57	61	32	76	25	38	38	21	62	12	60	37	47	65	46	39	52	109	135	45	60	0	62	29	21	17	6	76	0	327	15	14	25	22	44	12
OTU_441	Chordata	Actinopteri	Perciformes	Percidae	Perca		96.988	Midori2	GCGGTTATACGACGCCCAAGTTGATAGACATCGGCGTAAAGCGTGGTTAAGATTAAAGACAATACTAAAGCCGAACACCTTCAGAGCTGTTATACGCATCCGAAGGTAAGAAGTTCAACCACGAAAGTGGCTTTATTACCCCTGAACCCACGAAAGCTACGATA	0	2	0	7	4	6	3	10	5	7	1	0	6	3	1	5	5	7	9	60	59	60	39	0	22	17	59	54	39	56	0	43	56	54	87	149	125	43
OTU_442	Chordata	Actinopteri	Cypriniformes	Leuciscidae	Leuciscus		95.906	Midori2	GCGGTTAAACGAGAGGCCCTAGTTAATAATACACGGCGTAAAGGGGTTAAGGAGAGCATAACAATAAAGCCAAATGGCCCTTTGGCTGTCATACGCTTCTAGGTGTCCGAAGTTCAACATACGAAAGTAGCTTTAATAACGCCCACCTGACCCCACGAAAGCTGAGAAA	0	0	0	1	0	1	3	1	4	0	2	6	1	1	2	90	149	8	119	12	33	21	3	0	9	11	20	50	8	30	0	9	12	27	195	617	236	58
OTU_445	Chordata	Actinopteri	Cypriniformes	Leuciscidae	Abramis	Abramis brama	97.633	Midori2	GCGTTAAACGAGAGGCCCCAGTTAATAATACACGGCGTAAAGTGTGGTTAAGGAAAGTATTAACAATAAAGCCGAATGGCCCTTTGCTGTCATACGCTTCTAGGTGTCCGAAGTTCAACATACGAAAGTAGCTTTAATAACGCCCACCTGACCCCACGAAAGCTAGGAAA	0	0	0	0	0	0	0	0	0	0	0	0	0	0	0	0	0	0	0	16	10	17	1	0	9	0	9	351	0	3	0	8	21	17	0	8	5	7
OTU_446	Chordata	Actinopteri	Gobiiformes	Gobiidae	Neogobius		96.988	Midori2	GCGGTTATACGAGAGGCCCAAGTTGACAAAAATCGGCGAAAAGCGTGGTTAGATATCACCTCCACTAAAGCCAAACACCTTCAACGCTGTAATACGCCCCCGAAGACAGGAAGCCCAATCACGAAAGTAGCTTTAATTTTCATGAAGCCACGAAAGCTGAGAAA	1	0	0	0	0	0	0	0	0	0	2	0	0	0	0	0	2	0	0	29	0	4	0	0	12	0	3	0	0	10	2	10	6	0	4	13	3	4
OTU_447	Chordata	Actinopteri	Siluriformes	Siluridae	Silurus	Silurus glanis	97.561	Midori2	GCGGTTATACGAAAAACCCTAGTTAATAGCCACGGCGTAAAGGTGGTTAAGGAATATAACAAATAAAGCTAAAGACCCTCTAAGCCGTTATACGCACTCCGAGGACACGAAGCCCAAACACGAAAGTAGCTTTAAACCCCTCCTGACTCCACGAAAGCTACGATA	0	0	2	0	0	3	0	0	0	0	0	0	0	0	0	0	1	0	0	4	2	2	0	0	4	0	6	0	772	0	0	3	0	8	0	15	0	5
OTU_449	Chordata	Actinopteri	Perciformes	Percidae	Perca		96.988	Midori2	GCGGTTATACGAGAGGCCCAAGTTGATAGACATCGGCGTAAAGCGTGGTTAAGATTAAAGACAATAAAGCCGAACACCTTCAGAGCTGTTATACGCATCCGAAGGTAAGAAGTTCAACCACGAAAGTGGCTTTATTACCCCTGAACCCACGAAAGCTACGATA	0	5	47	31	3	9	9	9	3	9	4	0	6	4	9	4	8	11	9	51	63	84	60	0	33	56	75	59	43	63	0	63	64	69	91	183	152	59
OTU_450	Chordata	Actinopteri	Gobiiformes	Gobiidae	Neogobius		96.988	Midori2	GCGGTTATACGAGAGGCCCAAGTTGACAAAAATCGGCGAAAAGCTTAGTGATATCACCTCCACTAAAGCCAAACACCTTCAAGGCTGTAATACGCCCCCGAAGACAGGAAGCCCAATCACGAAAGTAGCTTTAATTTTCATGGAGCCACGAAAGCTAGGAAA	5	20	0	0	6	3	3	16	5	0	2	5	0	2	0	0	0	12	0	9	3	8	3	0	1	0	6	18	8	13	0	19	2	5	41	0	65	2
OTU_451	Chordata	Actinopteri	Gobiiformes	Gobiidae	Neogobius	Neogobius melanostomus	98.16	Midori2	GCGTTATACGAGAGGCCCAAGTTGACAAAAATCGGCGAAAAGCGTGGTTAGTGATATCACCTCCACTAAAGCCAAACACCTTCAAGGCTGTAATACGCCCCCGAAGACATGAAGCCCAATCACGAAAGTCTTTAATTTTCATGAAGCCACGAAAGCTAGGAAA	1	0	0	0	0	0	0	0	0	0	0	0	0	0	0	0	0	0	0	0	0	0	0	0	0	0	3	1	0	3	0	30	1	5	4	2	0	0
OTU_452	Chordata	Actinopteri	Perciformes	Gasterosteidae	Gasterosteus		96.97	Midori2	GCGGTTATACGAGAGGCCCAAGTTGATGAATTACGGCGTAAAGAGTGGTTAAGCTAAAATTAAAACTAAAGCCGAACACCTTCAGAGCTGTTATACGCATCCGAAGGTAAGAAGTTCAACCACGAAGGTGGCTTTATCTAACCTGAACCCACGAAAGCTACGGCA	0	2	0	2	0	0	0	2	0	0	0	0	0	0	0	0	1	0	0	2	37	9	11	0	5	0	19	49	0	30	0	13	2	3	21	22	9	2
OTU_453	Chordata	Actinopteri	Cypriniformes	Leuciscidae			96.512	Midori2	GCGGTTAAACGAGAGGCCCCAGTTAATAATACACGGCGTAAAGGGTGGTTAAGGAAAGTATTAACAATAAAGCCGAATGGCCCTTTGGCTGTCATGCTTCTAGCTGTCCGAAGCCCAATATACGAAAGTAGCTTTAATAAAGCCCACCTGACCCCACGAAAGCTGAGAAA	6	0	7	1	0	5	2	1	3	2	0	0	0	3	3	1	9	1	3	8	0	2	1	0	2	2	0	3	0	3	0	4	1	44	160	9	1	12
OTU_454	Chordata	Actinopteri	Cypriniformes	Leuciscidae	Leuciscus		97.576	Midori2	GCGGTTAAACGAGAGCCCCTAGTTAATAATACACGGCGTAAAGGGTGGTAAGGAAAGCATAACAATAAATCCGAATGGCCCTTTGGCTTTCATACGCTTCTAGGTGTCCGAAGCCCAATATACGAAAGTAGCTTTAATAAAGCCCACCTGACCCCACGAAAGCTACGATA	0	0	0	0	0	0	0	0	0	0	0	0	0	0	0	0	0	0	0	0	0	0	0	0	0	0	0	0	0	0	0	0	411	0	1	0	0	0
OTU_455	Chordata	Mammalia	Artiodactyla	Suidae	Sus	Sus scrofa	99.39	Midori2	GCGGTCATACGATTAACCCAAATTAATAGATCCACGGCGTAAAGAGTGTTTAAGaaaaaaaaaCCACAATAGAGTTAAATTATAACTAAGCTGTAAAAAGCCCTAGTTAAAATAAAATAACCCACGAAAGTGACTCTAATAATCCTGACACACGAAAGCTAGGAAA	0	0	0	1	0	0	0	0	0	0	0	0	0	12	0	0	0	0	0	0	0	0	33	0	0	0	12	0	0	0	0	0	0	0	0	0	0	0
OTU_457	Chordata	Actinopteri	Perciformes	Gasterosteidae	Gasterosteus	Gasterosteus aculeatus	99.367	Midori2	GCGGTTATACGAGAGGCCCAAGTTGATGAATTACGGCGTAAAGAGTGGTTAAGCTAAAATTAAAACTAAAGCCGAACACCCCCAAAGCTGTTATACGCATCCGGAGGTGAGAAGTTCAACCACGAAGGTGGCTTTATCTAACCTGAACACACGAAAGCCAGCA	0	117	29	53	74	35	14	95	151	29	73	48	26	33	30	64	43	28	102	18	84	24	49	50	38	37	133	67	11	53	119	37	19	29	50	30	21	35
OTU_458	Chordata	Actinopteri	Perciformes	Percidae	Perca	Perca fluviatilis	98.16	Midori2	GCGGTTATACGAGAGGCCCAAGTTGATAGACATCGGCGTAAAGCGTGGTTAAGATTAAAGACAATACTAAAGCCGAACACCTTCAGAGCTGTTATACGCATCCGAAGGTAAGAAGTTCAACCACGAAAGTGGTTTTATTCCCCTGAACCCACGAAAGCTACGGCA	1	6	4	9	1	1	5	4	3	1	2	0	5	0	0	0	0	3	4	14	72	38	18	10	15	4	29	31	47	47	0	756	19	27	41	60	25	31
OTU_459	Chordata	Actinopteri	Cypriniformes	Leuciscidae	Rutilus	Rutilus rutilus	97.661	Midori2	GCGGTTAAACGAGAGGCCCTAGTTAGTAATACACGGCGTAAAGGGTGGTTAAGGGGAGCGCAATAATAAAGCCAAATGGCCCTTTGGCTGTCATACGCTTCTAGGTGTCCGAAGTCCAATATACGAAAGTAGCTTTAATAAAGCCCACCTGACCCCACGAAAGCTGAGAAA	6413	2	12	0	18	22	15	59	4	12	10	17	19	98	43	18	7	47	4	17	11	12	14	0	15	8	132	15	18	17	3	29	40	60	18	23	13	16
OTU_461	Chordata	Actinopteri	Gobiiformes	Gobiidae	Neogobius		96.988	Midori2	GCGGTTAAACGAGAGGCCCAAGTTGACAAAAATCGGCGAAAAGCGTGGTTAGTGATATCACCTCCACTAAAGCCAAACACCTTCAAGGCTGTACGCCCCCGAAGACGGAAGCCCAATCACGAAAGTAGCTTTAATTTTCATGAAGCCACGAAAGCTAGGAAA	16	10	11	12	3	9	6	2	12	2	3	2	12	8	5	9	4	5	10	16	17	12	5	1	12	3	9	8	6	6	0	379	11	8	17	21	12	20
OTU_462	Chordata	Actinopteri	Gobiiformes	Gobiidae	Neogobius	Neogobius melanostomus	98.137	Midori2	GCGGTTATACGGGAGGCCCAAGTTGACAAAAATCGGCGAAAAGCGTGGTTAGTGATATCACCTCCTAAAGCCAAACACCTTCAAGGCTGTAATACGCCCCCGAAGACAGGAAGCCCAATCACGAAAGTAGCTTTAATTTTCATGAAGCCACGAAAGCTAAAA	8	13	20	17	5	15	13	20	14	10	16	17	8	6	8	16	13	15	14	29	17	10	28	29	15	14	26	13	16	22	77	16	234	44	25	17	24	18
OTU_463	Chordata	Actinopteri	Gobiiformes	Gobiidae	Neogobius		95.181	Midori2	GCGGTTATACGAGAGGCCCAAGTTGATAGACATCGGCGTAAAGCGTGGTTAGTGATATCACCTCCACTAAAGCCAAACACCTTCAAGGCTGTAATACGCCCCCGAAGACAGGAAGCCCAATCACGAAAGTAGCTTTAATTACTATGAATCCACGAAAGCTAGGAAA	215	451	611	462	313	475	469	708	284	634	296	183	430	336	294	620	552	498	526	2057	2568	2195	1595	103	1281	857	2075	1827	2169	1834	132	2064	1583	1445	2618	3552	2394	1593
OTU_464	Chordata	Actinopteri	Cypriniformes	Leuciscidae	Leuciscus		95.906	Midori2	GCGGTTAAACGAGAGGCCCTAGTTAATAATACACGGCGTAAAGGGTGGTTAAGGAGAGCATAACAATAAAGCCGAATGGCCCTTTGGCTGTCATACGCTTCTAGGTGCCCGAAGTTCAACATACAAAAGTAGCTTTAATAACGCCCACCTACCCCACGAAAGCTGAGAAA	0	0	0	0	0	5	0	0	0	0	0	0	0	0	0	0	2	2	3	2	0	0	2	0	0	0	0	3	0	1	0	5	0	3	5	19	393	0
OTU_465	Chordata	Actinopteri	Gobiiformes	Gobiidae	Neogobius		96.988	Midori2	GCGGTTATACGAGAGGCCCAAGTTGACAAAAATCGGCGAAAAGCGTGGTTAATGATATCACCTCCACTAAAGCCAACCTTCAAGGCTGTAATACGCCCCCGAAGACAGGAAGCCCTATCACGAAAGTAGCTTTAATTTTCATGAAGCCACGAAAGCTAGGAAA	0	0	0	0	0	0	0	0	0	0	0	2	0	0	0	0	0	0	0	0	0	0	0	0	0	0	0	1	0	0	0	0	0	0	0	0	0	0
OTU_466	Chordata	Actinopteri	Perciformes	Percidae	Perca		96.988	Midori2	GCGGTTATACGAGAGGCCCAAGTTGATAGACAGCGTAAAGCGTGGTTAAGATTAAAGACAATACTAAAGCCGAACACCTTCAGAGCTGTTATACGCATCCGAAGGTAAGAAGTTCAACCACGAAAGTGGCTTTATTACCCCTGAACCCACGAAAGCTACGATA	2	2	2	8	2	4	4	7	2	6	2	1	1	2	3	0	3	10	3	19	22	44	14	0	12	7	42	58	48	42	0	44	48	50	32	86	80	37
OTU_467	Chordata	Actinopteri	Cypriniformes	Tincidae	Tinca	Tinca tinca	98.204	Midori2	GCGGTTAAACGAGAGGCCCTAGTTAATAATACACGGCGTAAAGGGTGGTTAAGGAAAGCATTATAATAAAGCCAAATGGCCCCTTGGCCGTCATACGCTTCTAGGTGCCCGAAGCCCAACCACACGAAAGTAGCTTTAACAAAGCCCACCTGACCCCACGAAAGCTACGATA	0	0	0	0	0	0	0	0	0	0	0	0	0	0	0	0	0	0	0	0	43	15	19	0	44	31	23	42	16	42	0	19	0	181	128	110	28	0
OTU_468	Chordata	Actinopteri	Gobiiformes	Gobiidae	Neogobius		96.386	Midori2	GCGGTTATACGAGAGGCCCAAGTTGACAAAAATCGGCGAAAGGCGTGGTTGATATCACCTCCACTAAAGCCAAACACCTTCAAGGCTGTAATACGCCCCCGAAGACAAAGCCCAATCACGAAAGTAGCTTTAATTTTCATGAAGCCACGAAAGCTAGGAAA	0	0	0	0	0	0	0	0	0	0	0	0	0	0	0	0	0	0	0	0	0	0	0	0	0	0	0	3	0	0	0	0	0	0	0	0	5	0
OTU_469	Chordata	Actinopteri	Cypriniformes	Leuciscidae	Leuciscus	Leuciscus leuciscus	97.093	Midori2	GCGGTTAAACGAGAGGCCCTAGTTAATAGTACACGGCGTAAAGGGTGGTTAAGGAGAGCATAACAATAAAGCCAAATGGCCCCTTTGGCTGTCATACGCTTCTAGGTGTCCGAAGCCCAACATACGAAAGTAGCTTTAATAACGCCCACCTGACCCCACGAAAGCTGAGAAA	9	5	0	4	0	9	9	1	2	1	88	1	0	1	0	118	190	9	99	8	24	23	12	0	7	0	14	9	4	212	0	5	6	12	155	397	174	25
OTU_470	Chordata	Actinopteri	Cypriniformes	Leuciscidae	Abramis		96.512	Midori2	GCGGTTAAACGAGAGGCCCCAGTTAAATACACGGCGTAAAGGGTGGCTAAGGAAATTAACAATAAAGCCGAATGGCCCTTTGGCTGTCATACGCTTCTAGGTGTCCGAAGTTCAACATACGAAAGTAGCTTTAATAACGCCCACCTGACCCCACGAAAGCTGAGAAA	0	0	0	0	0	0	0	0	0	0	0	0	0	0	0	0	0	0	0	0	483	5	0	0	2	0	0	0	0	0	0	0	0	0	0	5	1	0
OTU_471	Chordata	Actinopteri	Cypriniformes	Leuciscidae	Rutilus	Rutilus rutilus	97.661	Midori2	GCTGTTAATCGAAAGGCCCCAGTTAATAATACACGGCGTAAAGGGTGGTTAAGGGAAGCACAATAATAAAGCCAAATGGCCCTTTGGCTGTCATACGCTTCTAGGTGTCCGAAGCCCAATATACGAAAGTAGCTTTAATAAAGCCCACCTGACCCCACGAAAGCTGAGAAA	0	4	6	3	0	6	5	2	4	1	1	1	9	5	9	12	6	6	5	22	14	9	1	0	13	3	12	9	6	4	42	23	21	10	13	12	10	15
OTU_472	Chordata	Mammalia	Rodentia	Myocastoridae	Myocastor	Myocastor coypus	98.758	Midori2	GCGTCATACGATTAACCCTGATTAATAAACCCCGGCGTAAAGAGTATTAAAGATACAATAAAAATAAGATTAAATTTCACCTGGGTCGTAAAAAACTATAGATAAAAATAAAATCGATAACGAAGGTAATCTTAATATATCAGAATATACTAAAGCTAATACA	0	14	0	0	0	0	0	0	0	0	0	0	0	7	0	23	0	0	0	4	11	0	6	148	0	10	9	1	0	488	0	0	0	0	0	0	0	0
OTU_473	Chordata	Actinopteri	Gobiiformes	Gobiidae	Neogobius		96.988	Midori2	GCGGTTATACGAGAGGCCCTAGTTGATAATTGTCGGCGAAAAGCGTGGTTAGTGATATCACCTCCACTAAAGCCAAACACCTTCAAGGCTGTAATACGCCCCCGAAGACAGGAAGCCCAATCACGAAAGTAGCTTTAATTTTCATGAAGCCACGAAAGCTAGGAAA	10	22	10	7	4	20	8	6	9	3	8	6	9	3	11	12	9	13	17	18	29	17	15	0	7	0	11	13	5	15	5	14	4	7	7	19	22	10
OTU_474	Chordata	Actinopteri	Perciformes	Percidae	Perca	Perca fluviatilis	98.113	Midori2	TCGGTTATACGAGAGGCCCAAGTTGATAGACATCGGAAAAGCGTGGTTAAGATTAAAGACAATACTAAAGCCGAACACCTTCAGAGCTGTTATACGCATCCGAAGGTAAGAAGTTCAACCACGAAAGTGGCTTTATAGCCCCTGAACCCACGAAAGCTGAGAAA	0	2	4	2	1	0	0	0	3	1	2	0	0	1	2	4	1	2	0	11	644	13	6	0	5	2	7	9	8	11	0	5	17	6	41	34	19	23
OTU_475	Chordata	Actinopteri	Perciformes	Percidae	Perca	Perca fluviatilis	97.561	Midori2	GCGGTTATACGAGAGGCCCAAGTTGATAGACATCGGCGTAAAGCGTGGTTAAGATTAAAAAAGATACTAAAGCCGAACACCTTCAGAGCTGTTATACGCATCCGAAGGTAAGAAGTTCAACCACGAAAGTGGCTTTATAGCCCCTGAACCCACGAAAGCTAGGAAA	2	6	10	11	3	16	8	13	6	16	12	3	5	2	7	14	10	4	9	535	27	38	14	0	27	25	57	31	26	19	0	38	32	14	52	54	35	31
OTU_477	Chordata	Actinopteri	Cypriniformes	Leuciscidae	Abramis		96.512	Midori2	GCGGTTAAACGAGACGCCCCAGTTAATAATACACGGCGTAAAGGGTGGTTAAGGAAAGTATTAACAATAAAGCCGAATGGCCCTTTGGCTGTCATACGCTTCTTCTCCGAAGTTCAACATACGAAAGTAGCTTTAATAACGCCCACCTGACCCCACGAAAACTGAGAAA	0	0	0	1	0	0	0	0	0	0	0	0	0	0	0	0	0	0	0	0	0	0	0	0	0	0	0	0	0	0	0	0	0	0	0	0	0	0
OTU_478	Chordata	Actinopteri	Perciformes	Percidae	Perca	Perca fluviatilis	98.125	Midori2	GCGGTTATACGAGAGGCCCAAGTTGATACATCGGCGTAAAGCGTGGTTAAGATTAAAGACAATACCAAAGCCGAACACCTTCAGAGCTGTTATACGCATCCGAAGGTAAGAAGTTCAACCACGAAAGTGGCTTTATAGCCCCTGAACCCACGAAAGCTGAGAAA	0	23	71	29	3	2	1	6	2	0	2	0	1	0	1	5	4	3	0	10	11	436	11	4	6	17	9	10	6	22	0	6	6	7	10	25	18	44
OTU_479	Chordata	Actinopteri	Cypriniformes	Leuciscidae	Abramis	Abramis brama	98.193	Midori2	GCGGTTAAACGAGAGGCCCCAGTTAATAATACACGGCGTAAAGGGTGGTTAAGGAAAGTATTAACAATAAAGCCGAATTGCCCTTAGCTGTCATACGCTTCTAGGTGTCCGAAGTTCAACATACGAAAGTAGCTTTAATAACGCCCACCTGACCCCACGAAAGCTACGATA	0	0	0	3	0	0	0	0	0	0	2	0	0	0	0	0	0	0	2	8	2	13	0	0	8	0	4	3	2	696	0	17	5	3	7	6	18	11
OTU_480	Chordata	Actinopteri	Perciformes	Percidae	Perca		95.758	Midori2	GCGGTTATACGAGAGGCCCAAGTTGATAGACATCGGCGTAAAGCGTGGTTAAGATTAAAGACAATACTAAAGCCGAACACCTTCAGAGCTGTTATACGCATCCGAAGGTAAGAAGTTCAACCACGAAAGTGGCTTTATCTAACCCCCCCACGAAAGCTACGGCA	0	0	0	0	0	0	0	0	1	0	0	0	0	0	0	0	1	0	0	15	29	13	26	0	7	1	35	23	2	14	0	14	7	22	29	28	3	1
OTU_481	Chordata	Aves	Columbiformes	Columbidae	Columba	Columba palumbus	99.412	Midori2	GCGGTCACACAAGAGACCCAAACTAATCGTTCACGGCGTAAAGAGTGGACTCATGCTTATCACATTAATTAAGGTCAAAACGCAGCTGAGCTGTCATAAGCTTAAGGTGCACTTAAAACCGCCCTAAATACGACCCTAAACTCATACGACTCAATGAACTCCACGAAAGCTGAGAAA	0	0	0	5	0	0	0	0	0	0	2	0	0	0	0	4871	0	2	0	4	0	1	2	0	8	0	1	4	0	0	0	0	0	0	0	0	0	6
OTU_482	Chordata	Actinopteri	Perciformes	Percidae	Perca	Perca fluviatilis	98.16	Midori2	ACGGTTATACGAGAGGCCCAAGTTGATAGACATCGCGTAAAGCGTGGTTAAGATTAAATACAATACTAAAGCCGAACACCTTCAGAGCTGTTATACGCATCCGAAGGTAAGAAGTTCAACCACGAAAGTGGCTTTATAGCCCCTGAACCCACGAAAGCTAGGAAA	0	0	0	0	0	0	0	0	0	0	0	0	0	0	0	0	0	0	0	0	5	5	0	0	20	1	18	13	25	23	0	20	503	0	19	34	7	14
OTU_483	Chordata	Actinopteri	Cypriniformes	Leuciscidae	Chondrostoma		95.906	Midori2	GCGGTTAAACGAGAGGCCCTAGTTAATAATACACGGCGTAAAGGGTGGTTAAGGAAAACATAACAATAAAGCCGAATGGCCCTTTGGCTGTCATACGCTTCTAGGTGTCCGAAGCCCTAATACGAAAGTAACTTTAACGAACCCACCTGACCCCACGAAAGCTGAGGAA	0	20	38	48	46	64	59	54	28	34	37	54	42	77	65	196	39	84	70	59	71	35	140	0	73	22	46	51	50	240	0	95	40	58	307	117	205	60
OTU_484	Chordata	Actinopteri	Cypriniformes	Leuciscidae	Rutilus	Rutilus rutilus	97.688	Midori2	GCGGTTAAACGAGAGGCCCTAGTTAATAATACACGGCGTAAAGGGTGGTTAAGGGAAGCACAATAATAAAGCCGAATGGCCCTTTTGGCTGTCATACGCTTCTAGGTGTCCGAAGCCCAAATATACGAAAGTAGCTTTAATAAAGTCCACCTGACCCCACGAAAGCTGAGAAA	0	14	40	23	22	29	39	27	34	61	15	22	26	67	67	91	17	71	64	132	67	30	76	0	60	26	67	71	85	681	0	124	85	93	184	148	267	78
OTU_487	Chordata	Actinopteri	Gobiiformes	Gobiidae	Neogobius		96.988	Midori2	GCGGTTATACGATAGGCCCAAGTTGGCAAAAATCTGCGAAAAGCGTGGTTAGTGATATCACCTCCACTAAAGCCAAACACCTTCATGCTGTAATACGCCCCCGAAGACAGGAAGCCCAATCACGAAAGTAGCTTTAATTTTCATGAAGCCACGAAAGCTAGGAAA	0	0	2	0	0	0	0	0	0	0	0	0	0	0	0	0	0	0	0	0	2	4	0	8	3	1	3	554	5	4	0	5	2	0	0	7	3	2
OTU_489	Chordata	Actinopteri	Gobiiformes	Gobiidae	Neogobius		95.181	Midori2	GCGGTTATACGAGAGGCCCAAGTTGACAAAAATCGGCGAAAAGCGTGGTTAGTGATATCACCTCCACTAAAGCCAAACACCTTCAAGGCTGTAATACGCATCCGAAGGTAAGAAGTTCAACCACGAAAGTAGCTTTAATTTTCATGAAGCCACGAAAGCTAGGAAA	0	0	0	0	0	0	0	0	0	0	0	0	0	0	0	0	0	0	0	15	15	12	5	0	1	0	7	7	2	7	0	11	6	7	24	28	12	8
OTU_490	Chordata	Actinopteri	Cypriniformes	Leuciscidae			94.737	Midori2	GCGGTTATACGAGAGGCCCAAGTTGACAAAAATCGGCGAAAAGGGTGGTTAAGGGGAGCACAATAATAAAGCCAAATGGCCCTTTGGCTGTCATACGCTTCTAGGTGTCCGAAGCCCAATATACGAAAGTAGCTTTAATAAAGCCCACCTGACCCCACGAAAGCTGAGAAA	17	5	44	15	21	37	32	25	21	23	16	12	18	40	30	27	31	36	28	75	35	51	23	0	42	14	60	39	46	39	5	97	103	64	89	97	63	70
OTU_492	Chordata	Actinopteri	Cypriniformes	Leuciscidae	Abramis		96.512	Midori2	GCGGTTAAACGAGAGGCCCCAGTTAATAATACACGGCGTAAAGGGTTAAGGAAAGTATTAACAATAAAGCCGAATGGCCCTTTGGCTGTCATACGCTTCTAGGTGTCCGAATTTCAACATACGAAAGTAGCTTTAATAACGCCCACCTGACCCCACGAAAGCTAGGAAA	0	0	0	0	0	0	0	0	1	0	1	1	0	1	0	0	0	0	0	7	59	19	36	0	7	1	34	4	0	14	0	0	20	0	0	0	0	7
OTU_493	Chordata	Actinopteri	Gobiiformes	Gobiidae	Neogobius	Neogobius melanostomus	99.371	Midori2	GCGGTTATACGAGAGGCCCAAGTTGACAAAAATCGGCGAAAAGCGTGGTTAGTGATATCACCTCCACTAAAGCCAAACACCTTCAAGGCTGTAATACGCCCCCGAAGACAGGAAGCCCAATCACGAAAGTAGCTTTAATTTTCATTAAGCCACGAAAGCCGAAA	310	303	282	291	278	313	279	312	305	214	200	359	248	236	293	267	238	221	256	262	202	220	216	389	206	173	764	376	135	235	247	206	915	908	601	1239	338	326
OTU_496	Chordata	Actinopteri	Perciformes	Percidae	Perca		95.181	Midori2	GCGGTTATACGAGAGGCCCAAGTTGATAGACATCGGCGTAAAGCGTGGTTAAAGACAATACTAAAGCCGAACACCTTCAGAGCTGTTATACGCATCCGAAGGTAAGAAGTTCAACCACGAAAGTGGCTTTATTACCCCTGAACCCACGAAAGCTACGATA	0	0	0	0	0	0	0	0	0	0	0	0	0	0	0	0	0	0	0	0	0	0	0	0	0	0	5	0	0	0	0	0	0	0	0	581	0	0
OTU_500	Chordata	Actinopteri	Perciformes	Percidae	Sander		96.364	Midori2	GCGGTTATACGAGAGGCCCAAGTTGATAGACATCGGCGTAAAGCGTGGTTAAGACAAAAACAAAACTAAAGCCGAACACCTTCAGAGCTGTTATACGCATCCGAAGGTAAGAAGTTTAATTACGAAAGTGGCTTTATAGCCCCTGAACCCACGAAAGCTACGATA	0	0	5	3	0	1	0	4	0	6	2	0	2	1	2	0	2	6	4	16	15	34	21	0	12	7	54	14	27	22	0	25	33	16	33	50	42	21
OTU_501	Chordata	Actinopteri	Gobiiformes	Gobiidae	Neogobius		96.988	Midori2	GCGGTTATACGATAGGCCCAAGTTGACAAAAACCGCGAAAAGCGCGTTAGTGATATCACCTCCACTAAAGCCAAACACCTTCAAGGCTGTAATACGCCCCCGAAGACAGGAAGCCCAATCACGAAAGTAGCTTTAATTTTCATGAAGCCACGAAAGCTAGGAAA	0	0	0	0	0	0	1	0	0	0	1	0	0	0	1	0	0	0	1	0	0	0	0	0	2	0	0	0	0	0	0	1	7	0	0	0	3	0
OTU_503	Chordata	Actinopteri	Perciformes	Percidae	Perca		96.988	Midori2	GCGGTTATACGAGAGGCCCAAGTTGATAGACATCGGCGTAAAGCGTGGTTAAGATTAAAGACAATACTAAAGCCCACCTTCAGAGCTGTTATACGCATCCGAAGGTAAGAAGTTCAACCACGAAAGTGGCTTTATTACCCCTGAACCCACGAAAGCTACGATA	0	0	0	6	1	2	5	3	0	8	5	3	2	2	0	0	1	8	5	22	23	82	24	0	10	16	32	34	37	31	0	30	41	38	65	66	62	16
OTU_504	Chordata	Actinopteri	Cypriniformes	Leuciscidae			93.567	Midori2	GCGGTTAAACGAGAGGCCCTTTAATAATACACGGCGTAAAGGGTGGTTAAGGAGAGCATAACAATAAAGTCAAATGGCCCCTTGGCCGTCATACGCTTCTAGGAGTCCGAAGCCCTAATACGAAAGTAACTTTAATAAACCCACCTGACCCCACGAAAGCTGAGAAA	0	1	8	14	7	23	31	17	3	2	17	11	13	29	39	71	80	50	58	69	34	100	69	0	43	9	59	35	33	85	0	93	93	57	525	653	367	121
OTU_506	Chordata	Actinopteri	Perciformes	Percidae	Perca		95.181	Midori2	GCGGTTATACGAGAGGCCCAAGTTGACAAAAATCGGCGAAAAGCGTGGTTAAGATTACAATACTAAAGCCGAACACCTTCAGAGCTGTTATACGCATCCGAAGGTAAGAAGTTCAACCACGAAAGTGGCTTTATAGCCCCTGAACCCACGAAAGCTACGATA	292	724	825	888	519	1001	789	980	501	854	490	452	691	510	479	1067	915	736	806	3575	3103	2808	2009	159	1861	1221	3112	2621	2141	2891	174	3210	2682	2078	3176	4220	2480	2285
OTU_508	Chordata	Actinopteri	Esociformes	Esocidae	Esox	Esox lucius	97.484	Midori2	GCGGTTATACGAGAGGCCCTAGTTGATAATTGTCGGCGTAAAGAGTGGTTTAGAAAATAATTTAATAAAGCCGAACACCTCCCCTTTGTTATACACATTTGAAGATATGAAGCCCTACCGCGAAAGCAGCTTTAAGTATCCTGAACCCACGAAAGCTACGATA	0	2	0	0	0	9	1	0	0	0	0	0	0	0	0	0	0	0	0	27	26	41	24	0	15	0	5	44	32	12	0	43	12	0	9	0	0	0
OTU_509	Chordata	Actinopteri	Cypriniformes	Leuciscidae	Chondrostoma	Chondrostoma nasus	97.661	Midori2	GCGGTTATACGAGAGGCCCAAGTTAATAATACACGGCGTAGAGGGTGGTTAAGGAAAGCATAACAATAAAGCCGAATGGCCCTTTGGCGTCATACGCTTCTAGGTGTCCGAAGCCCATTATACGAAAGTAGCTTTAACAAAGCCCACCTGACCCCACGAAAGCTGAGAAA	0	0	0	0	0	16	3	0	0	0	15	0	0	0	0	0	0	0	0	1	0	0	0	0	28	0	0	0	0	60	0	8	0	0	0	5	0	3
OTU_513	Chordata	Actinopteri	Cypriniformes	Leuciscidae	Leuciscus		96.512	Midori2	GCGGTTAAACGAGAGGCCCCAGTTAATAATACACGTGTAAACGGTGGTTAAGGAAAGTATTAACAATAAAGCCGAATGGCCCTTTGGCTGTCATACGCTTCTAGGTGTCCGAAGCCCAATATACGAAAGTAGCTTTAATAAAGCCCACCTGACCCCACGAAAGCTGAGAAA	4	0	7	7	2	0	9	1	0	2	3	2	2	3	0	7	0	1	9	26	7	11	13	0	5	1	15	10	6	6	0	3	26	7	15	30	18	15
OTU_514	Chordata	Actinopteri	Cypriniformes				95.858	Midori2	GCGGTTATACGAGAGGCCCAAGTTGATATTACAACGGCGTAAAGGGTGGTTAAGGATAAAAATAAAGTCAAATGGCCCCTTGCCCGTCATACGCTTCTAGGAGTCCGAAGCCCTAATACGAAAGTAACTTTAATAAACCCACCTGACCCCACGAAAGCTGAGAAA	0	69	201	138	168	327	192	229	141	118	205	242	299	180	207	437	344	306	287	402	370	327	426	0	439	141	405	167	374	764	68	567	341	290	809	539	479	382
OTU_515	Chordata	Actinopteri	Cypriniformes	Cyprinidae	Cyprinus	Cyprinus carpio	99.387	manual check	GCGGTAGACGAGAGGCCCTAGTTGATATTACAACGGCGTAAAGGGTGGTTAAGGATAAACAAAAATAAAGTCAAATGGCCCCTTGGCCGTCATACGCTTCTAGGAGTCCGAAGCCCTAATACGAAAGTAACTTTAATAAACCCACCTGACCCCACGAAAGCTACGGCA	0	6	7	13	19	22	10	15	26	3	17	19	14	19	11	37	18	19	21	9	53	21	93	0	38	23	39	25	12	66	9	55	11	18	84	42	39	23
OTU_516	Chordata	Mammalia	Primates	Hominidae	Homo	Homo sapiens	98.773	Midori2	GCGGTTATACGATTAACCCAAGTCAATAGAAGCCGGCGTAAAGAGTGTTTTAGATCACCCCCTCCCCAATAAAGCTAAAACTCACCTGAGTTGTAAAAAAACTCCAGTTGACACAAAATAGACTACGAAAGTGGCTTTAACATATCTGAACACACAATAGCTACC	27	297	227	19	21	19	22	19	24	14	8	3	13	8	11	15	32	0	116	8	89	17	59	0	13	0	5	0	0	0	0	14	0	90	0	0	3	5
OTU_517	Chordata	Actinopteri	Cypriniformes	Leuciscidae	Rutilus		95.322	Midori2	GCGGTTAAACGAGAGGCCCTAGTTAATAATACACGGCGTAAAGGGTGGTTAAGGGAAGCACAATAATAAAGCCAAATGGCCCTTTGGCTGTCATACGCTTCTAGGTGTCCGAAGCCCTAATACGAAAGTAACTTTAATAAACCCTGACCCCACGAAAGCTGAGAAA	0	28	161	46	60	105	133	73	66	93	76	76	139	182	201	440	180	261	217	345	136	197	180	0	171	57	156	110	215	374	32	409	197	218	686	402	488	290
OTU_518	Chordata	Actinopteri	Anguilliformes	Anguillidae	Anguilla	Anguilla anguilla	98.81	manual check	GCGGTTATACGAGGGGCTCAAATTGATATTACACGGCGTAAAGCGTGATtaaaaaacaaaaaactaaagccaaaaCACTTCCCAAGCTGTCATACGCTACCGGAACATAAACGAAGCCCTATAACGAAAGTAGCTTTAACACCTTTGAACTCACGACAGTTGAGGAA	0	0	0	0	0	0	0	0	0	0	0	0	0	0	0	0	0	0	0	0	0	2	0	0	0	3	0	0	0	0	0	0	2	0	0	0	6	0
OTU_519	Chordata	Actinopteri	Cypriniformes	Leuciscidae	Leuciscus		96.532	Midori2	GCGGTTAAACGAGAGGCCCTAGTTAATAATACACGGCGTAAAGGGTGGTTAAGGAAAGCACAATAATAAAGCCAAAATGGCCCTTTTGGCTGTCATACGCTTCTAGGTGTCCGAAGTTCAACATACGAAAGTAGCTTTAATAACGCCCACCTGACCCCACGAAAGCTGAGAAA	0	0	0	0	0	3	5	0	2	0	1	0	0	0	4	2	1	0	0	0	4	6	75	0	6	3	3	9	6	2	0	7	8	301	22	49	4	6
OTU_520	Chordata	Actinopteri	Cypriniformes	Leuciscidae	Leuciscus	Leuciscus leuciscus	97.076	Midori2	GCGGTTAAACGAGACCCCTAGTTAACAATACACGGCGTAAAGGGTGGTTAAGGAAAGCACAATAATAAAGCCAAATGGCCCTTTGGCTGTCATACTCTTCTAGGTGTCCGAAGCCCAATATACGAAAGTAGCTTTAATAACGCCCACCTGACCCCACGAAAGCTGAGAAA	0	0	0	0	0	1	0	0	4	0	0	0	0	0	0	0	0	0	0	0	0	0	15	0	0	0	0	0	0	0	0	0	0	4	0	0	0	0
OTU_521	Chordata	Actinopteri	Perciformes	Percidae	Perca	Perca fluviatilis	97.561	Midori2	GTGGTTATACGAGAGGCCCAAGTTGATAGACATCGGCGTAAAGCGTGGTTAAGATTAAAGATAGTACTAAAGCCGAACACCTTCAGAGCTGTTATACGCATCCGAAGGTAAGAAGTTCAATTACGAAAGTGGCTTTATAGCCCCTGAACCCACGAAAGCTACGATA	0	0	0	0	0	0	0	0	0	0	0	0	0	0	0	0	0	0	0	0	0	3	0	0	0	0	0	129	0	0	0	1	0	0	0	0	0	1
OTU_522	Chordata	Actinopteri	Perciformes	Percidae	Perca		95.783	Midori2	GCGGTTATACGAGAGGCCCAAGTTGATAGACATCGGCGGCGTGGTTAAGATTAAAGACAATACTAAAGCCGAACACCTTCAGAGCTGTTATACGCACCCGAAGGTAAGAAGTTCAACCACGAAAGTGGCTTTATTACCCCTGAACCCACGAAAGCTACGATA	0	0	2	1	1	1	0	0	0	3	0	0	4	1	4	0	3	5	3	19	18	37	15	0	6	11	29	20	9	24	0	21	27	28	35	51	52	18
OTU_523	Chordata	Actinopteri	Cypriniformes	Leuciscidae	Abramis		95.93	Midori2	GCGGTTAAACGAGAGGCCCTAGTTAATAATACACGGCGTAAAGGGTGGTTAAGGAAAGCATAACAATAAAGCCGAATGGCCCTTTGGCTGTCATACGCTTCTAGTTGTCCGAAGTTCAACATACGAAAGTAGCTAATAACGCCCACCTGACCCCACGAAATCTGAGAAA	1	0	0	2	0	0	5	1	0	0	0	0	0	0	1	2	1	1	0	1	1	0	1	0	11	0	1	0	0	7	0	0	4	1	0	0	10	53
OTU_524	Chordata	Actinopteri	Cypriniformes	Leuciscidae	Leuciscus	Leuciscus leuciscus	97.076	Midori2	GCGGTTAAACGAGAGGCCCCAGTTAATAATACACGGCGTAAAGGGTGGTTAAGGAGACATAACAATAAAGCCAAATTGCCCTTTGGCTGTCATACGCTTCTAGGTGTCCGAAGCCCAATATCGAAAGTAGCTTTAATAAAGCCCACCTGACCCCACGAAAGCTGAGAAA	0	0	0	0	0	0	0	0	0	0	0	0	0	0	0	18	30	0	32	0	0	0	0	0	2	0	0	0	1	1	0	0	0	0	78	205	59	6
OTU_525	Chordata	Actinopteri	Gobiiformes	Gobiidae	Neogobius	Neogobius melanostomus	97.561	Midori2	GCGGTTATACGAGAGGCCCATTTGACAAAAATCGGCGAAAAGCGTGGTTAGTGATATCACCTCCACTAAAGCCAAACACCTTCAAGGCTGTAATACGCCCCCAAGACAGGAAGCCCAATCACGAAAGTAGCTTTAATTTTCATGAAGCCACGAAAGCTACGATA	0	1	0	0	0	0	0	0	0	0	0	0	0	0	0	0	0	0	0	0	0	0	5	0	0	0	7	0	0	422	0	6	0	14	0	0	3	1
OTU_526	Chordata	Actinopteri	Perciformes	Gasterosteidae	Gasterosteus	Gasterosteus aculeatus	98.795	Midori2	GCGGTTATACGAGAGGCCCAAGTTGATGAATTACGGCGTAAAGAGTGGTTAAGCTAAAATTAAAACTAAAAGCCGAACACCCCAAAGCTGTTATACGCATCCGGAGGTGAGAAGTTCAACCACGAAGGTGGCTTTATCTAACCTGAACCCACGAAAGCTACGGCA	0	2	0	0	0	0	0	0	14	2	3	0	0	0	0	0	2	0	1	0	4	1	9	0	1	3131	0	2	0	2	4	0	0	1	1	0	0	0
OTU_528	Chordata	Actinopteri	Cypriniformes	Leuciscidae	Rutilus		96.491	Midori2	GCGTTTAAGCGAGAGGCCCTAGTTAATAATACACGGCGTAAAGGGTGGTTAAGGGGCACAATAATAAAGCCAAATGGCCCTTTGGCTGTCATACGCTTCTAGGTGTCCGAAGCCCAATATACGAAAGTAGCTTTAAAAGCCCACCTGACCCCACGAAAGCTGAGAAA	55	2	6	0	0	15	8	25	11	1	3	16	11	36	99	0	1	50	6	8	0	7	0	0	8	8	6	0	7	9	2	11	26	12	3	281	11	6
OTU_529	Chordata	Actinopteri	Perciformes	Percidae	Perca		96.386	Midori2	GCGGTTAAACGAGAGGCCCTAGTTAATAGACATCGGCGTAAAGCGTGGTTAAGATTAAAGACAATACTAAAGCCGAACACCTTCAGAGCTGTTATACGCACCCGAAGGTAAGAAGTTCAACCACGAAAGTGGCTTTATTACCCCTGAACCCACGAAAGCTACGATA	0	0	2	5	0	6	2	0	0	1	0	0	0	5	9	0	11	6	7	15	19	42	10	0	16	9	27	19	11	28	0	24	30	21	38	98	65	34
OTU_530	Chordata	Actinopteri	Cypriniformes	Leuciscidae			97.093	Midori2	GCGGTTAAACGAGAGGCCCTAGTTAATAATACACGGCGTAAAGGGTGGTTAAGGAAAACATAACAATAAAGCCAAATGGCCCTTTGGCCGTCATACGCTTCTAGGTGTCCGAAGCCCGATCATACGAAAGTAGCTTTAACAAAGCCCACCTGACCCCACGAAAGCTGAGAAA	4	0	0	0	0	0	1	0	0	3	41	0	39	0	2	31	0	1	0	0	4	0	0	0	2	0	0	1	5	3	0	22	1	3	0	0	3	0
OTU_531	Chordata	Actinopteri	Gobiiformes	Gobiidae			92.073	Midori2	GCGGTTATACGAGAGGCCCAAGTTGATAGACATCGGCGTAAAGCGTGGTTAGTGATATCACCTCCACTAAAGCCAAACACCTTCAAGGCTGTAATACGCCCCCGAAGACAGGAAGCCCAATCACGAAAGTGGCTTTATAGCCCCTGAACCCACGAAAGCTACGATA	38	55	85	82	53	57	68	76	44	80	36	27	54	43	38	108	71	67	81	423	549	582	339	13	154	107	496	400	278	389	3	380	338	294	505	856	534	374
OTU_532	Chordata	Aves	Passeriformes	Turdidae	Turdus	Turdus philomelos	99.438	Midori2	GCGGTCATACAGGAGGCTCAAATTAACTTTATAACGGCGTAAAGAGTGGTCGCATGTTATCCAAGTAGCTAAGATTAAAAACAACTGAGCTGTCATAAGCCCAAGATGCCCATAAGGCCTCCGTCTTCAAAGAAGATCTTAGAACAACGATTAATTGAAGCCACGAAAGCCAGGACC	0	0	0	27	0	0	0	0	0	0	0	0	0	0	0	0	0	0	0	0	0	0	4	0	2	0	0	0	0	0	0	0	0	0	0	0	0	0
OTU_533	Chordata	Actinopteri	Cypriniformes				96.491	Midori2	GCGGTTAGACGAGAGGCCCTAGTTGATATTACAACGGCGTAAAGGGTGGTTAAGGAAAGTATTAACAATAAAGTCAAATGGCCCCTTGGCCGTCATACGCTTCTAGGAGTCCGAAGCCCTAATACGAAAGTAACTTTAATAAACCCACCTGACCCCACGAAAGCTGAGAAA	0	0	0	0	0	2	4	1	0	0	6	0	0	1	0	5	8	4	3	8	15	8	14	0	9	7	5	7	6	17	0	20	1	21	50	32	16	7
OTU_534	Chordata	Actinopteri	Gobiiformes	Gobiidae	Neogobius		96.988	Midori2	GCGTTTATACGAGAGGCCCAAGTTGACAAAAATCGGCGAAAAGCGTGGTTAGTGATATCACCTCCAAAAAGCCAAACACCTTCAAGGCTGTAATACGCCCCCGAAGACAGGAAGCCCAATCACGAAAGTAGCTTTAATTTTCATGAAGCCACGAAAGCTGAGAAA	1	4	14	16	4	9	11	8	8	12	8	5	6	9	8	9	7	12	3	13	7	12	12	0	5	2	8	146	5	17	6	21	21	11	29	34	15	20
OTU_535	Chordata	Actinopteri	Cypriniformes	Leuciscidae	Abramis	Abramis brama	98.182	Midori2	TCGGTTAAACGAGAGGCCCCAGTTAATAATACACGGCGTAAAGGGTGGTTAAGGAAAGTATTAACAATAAAGCCGAATGGCCCTTTGGCTGTCATACGCTTCTAGTTGTCCGAAGTTCAACATACGAAAGTAGCTAATAACGCCCACCTGACCCCACGAAAGCTACGATA	0	0	0	0	0	0	0	0	0	0	0	0	0	0	0	0	0	0	0	0	0	0	2	0	0	0	0	0	1	11	0	0	6	0	0	0	6	388
OTU_538	Chordata	Actinopteri	Gobiiformes	Gobiidae	Neogobius		96.988	Midori2	GCGGTTATACGAGAGGCCCAAGTTGACAAAAATCGGAAAAGGCGTGGTTAGTGATATCACCTCCACTAAAGCCAAACACCTTCAAGGCTTTAATACGCCCCCGAAGACAGGAAGCCCAATCACGAAAGTAGCTTTAATTTTCATGAAGCCACGAAAGTTAGGAAA	0	0	0	0	2	0	0	0	0	0	0	2	0	0	0	0	0	0	0	0	0	0	0	0	0	0	0	0	0	0	0	0	0	0	0	0	0	0
OTU_539	Chordata	Actinopteri	Perciformes	Percidae	Perca		96.988	Midori2	GCGGTTAGACGAGAGGCCCAAGTTGATAGACATGGGCGTAAAGCGTGGTTAAGATTAAAGACAATACTAAAGCCGAACACCTTCAGAGCTGTTATACGCATCCGAAGGTAAGAAGTTCAACCACGAAAGTGGCTTTATAGCCCCTTAACCCACGAAAGCGACCATA	0	0	2	0	0	0	0	0	0	0	0	0	0	0	0	0	0	0	0	32	29	126	28	0	33	34	114	24	32	37	0	29	111	26	38	169	21	0
OTU_542	Chordata	Actinopteri	Gobiiformes	Gobiidae	Neogobius		96.988	Midori2	GCGGTTATACGAGAGGCCCAAGTTGACAAAAATCGGCGAAAAGCGTGGTTAGTGATATCACCTCCACTAAAGCCATACCTTCAAGGCTGTAATACGCCCCCGAAGACAGGAAGCCCAATCACGAAAGTAGCTTTAATTTTCATGAAGCCACGAAAGCTGAGAAA	22	15	37	32	9	39	30	26	13	12	18	20	20	20	33	37	20	33	36	95	58	57	50	0	48	36	54	55	23	59	37	73	51	56	100	318	76	80
OTU_545	Chordata	Actinopteri	Cypriniformes	Cyprinidae	Barbus		95.858	Midori2	GCGGTTATACGAGAGGCCCAAGTTGATATTATAACGGCGTAAAGGGTGGTTAGGGATAAATAATAATAAAGCCAAATGGCCCCTTGGCCGTCATACGCTTCTTGTCCGAGGCCCTATATACGAAAGTAGCTTTAATTAACCCGCCTGACCCCACGAAAACTGAAAA	35	255	119	141	52	140	41	89	75	24	111	27	128	48	54	104	97	59	75	109	343	85	118	29	79	85	116	80	63	151	32	51	58	87	50	45	88	35
OTU_548	Chordata	Actinopteri	Gobiiformes	Gobiidae	Neogobius		96.988	Midori2	GCGGTTATACGAGAGGCCCAAGTTGACAAAAATCGGCGAAAAGCGTGGTTAGTGATATCACCTCCACTAAAGCCAAACACCTTCAAGGCTGTAACACGCCCCCGAAGACAGGAAGCCCAATCACAAAAGTAGCCTTTTTTCATGAAGCCACGAAAGCTAGGAAA	0	0	4	3	0	9	3	0	1	0	5	2	0	1	0	0	3	0	0	0	0	3	0	0	0	8	0	1	0	0	14	3	60	0	0	0	0	0
OTU_549	Chordata	Mammalia	Rodentia	Myocastoridae	Myocastor	Myocastor coypus	97.561	Midori2	GCGGTCATACGATTAACCCTGATTAATAAACCCCGGCGTAAAGAGTATTAAAGATACAAAAAATAAGATTAAATTTCATCTGGGTCGTAAAAACCTATAGATAAAAATAAAATCGATAACGAAGGTAATCTTAATATATCAGAATATACTAAACTAAGACA	0	8	0	0	0	0	0	0	0	0	0	0	0	0	0	0	0	0	0	0	28	0	7	68	0	0	0	1	0	0	0	0	0	241	0	0	0	0
OTU_550	Chordata	Actinopteri	Cypriniformes				94.737	Midori2	GCGGTTAAACGAGAGGCCCTAGTTAATAATACACGGCGTAAAGGGTGGTTAGGGATAAATAATAATAAAGCCAAATGGCCCCTTGGCCGTCATACGCTTCTAGGTGTCCGAGGCCCTATATACGAAAGTAGCTTTAATAACGCCCACCTGACCCCACGAAAGCTGAGAAA	0	10	11	11	0	12	6	0	3	0	4	2	6	0	6	18	2	8	11	23	66	65	25	0	14	6	10	35	0	23	0	19	13	17	27	26	48	6
OTU_551	Chordata	Actinopteri	Gobiiformes	Gobiidae	Ponticola		96.951	Midori2	GCGGTTATACGAGAGGCCCGAGTTGACAAACATTCGGCGTAAAGCGTGGTTAACTTATTTACTAAAGCCAAACACCTTTAAGGCTGTTATACGCCCCCAAAGGTAGGAAGACCCCTCACGAAAGTAGCTTTAATTACTATGAATCCACGAAAGCTGAGAAA	0	1	9	0	0	0	1	3	0	2	0	0	0	0	0	2	0	0	5	4	5	3	2	0	2	0	2	4	0	2	0	0	0	3	7	3	0	23
OTU_552	Chordata	Actinopteri	Cypriniformes	Leuciscidae	Squalius	Squalius cephalus	97.076	Midori2	GCGGTTAAACGAGAGACCCTAGTTAATAATACACGGCGTAAAGGGTGGTTAAGGAAGACATAACAATAAAGCCGAATGGCCCTTTGGCTGCCATACGCTTCTAGGTGTCCGAAGCCCAATATACGAAAGTAGCTTTAATAAAGTCCACCTGACCCCACAAAAGCTGAGAAA	0	8	12	264	11	12	9	14	24	8	18	18	7	20	14	11	6	7	19	4	3	3	5	0	12	3	5	3	3	38	0	7	22	33	7	7	21	26
OTU_553	Chordata	Actinopteri	Cypriniformes				95.266	Midori2	GCGGTTAGACGAGAGGCCCTAGTTGATATTACAACGGCGTAAAGGGTGGTTAAGGATAAAAATAAAGTCAAATGGCCCCTTGGCCGTCATACGCTTCTAGGAGTCCGAAGCCCTAATACGAAAGTAGCTTTAATTAACCCGCCTGACCCCACGAAAACTGAGAAA	0	46	60	57	12	75	27	30	23	16	70	12	108	31	52	96	65	37	62	151	510	214	227	8	143	17	102	77	52	374	0	105	97	104	142	134	240	40
OTU_554	Chordata	Actinopteri	Cypriniformes	Leuciscidae	Chondrostoma	Chondrostoma nasus	97.661	Midori2	GCGGTTAAACGAGAGGCCCTAGTTAATAATACACGGCGTAAAGGGTGGTTAAGGAAAGCATGACAATAAAGCCGAATGGCCCTCTGGCTGTCATACGCTTCTAGGTGTCCGAAGCCCGTTATACGAAAGTAGCTTTAACAACGCCCACCTGACCCCACGAAAGCTGAGAAA	85	0	0	0	0	0	0	0	0	0	0	0	0	0	0	0	0	0	0	0	0	0	0	0	0	0	0	0	0	0	0	0	0	0	0	0	0	0
OTU_555	Chordata	Actinopteri	Cypriniformes	Leuciscidae	Leuciscus		95.152	Midori2	GCGGTTAAACGAGAGGCCCTAGTTAATAATACACGGCGTAAAGGGTGGTTAAGGAAAGCATAACAATAAAGTCAAATGGCCCCTTGGCCGTCATACGCTTCTAGGAGTCCGAAGCCCTAATACGAAAGTAACTTTAATAAACCCACCTGAACCCACGAAAGCTACGATA	0	4	39	24	6	28	36	14	6	21	41	9	17	32	56	63	36	45	65	76	81	110	103	0	86	13	83	76	37	166	0	129	67	75	325	236	262	108
OTU_556	Chordata	Actinopteri	Gobiiformes	Gobiidae			90.533	Midori2	GCGGTTATACGAGAGGCCCAAGTTGACAAAAATCGGCGAAAAGCGTGGTTAGTGATATCACCTCCACTAAAGCCAAACACTTCCCAAGCTGTCATACGCTACCGGAACATAAACGAAGCCCTATAACGAAAGTAGCTTTAATTTTCATGAAGCCACGAAAGCTAGGAAA	0	0	0	0	0	0	0	0	0	0	0	0	0	0	0	0	0	0	0	0	1	3	0	0	0	0	0	5	0	2	0	6	2	0	2	11	4	0
OTU_557	Chordata	Actinopteri	Anguilliformes	Anguillidae	Anguilla		96.45	Midori2	GCGGTTATACGAGGGGCTCAAATTGATATTACACGGCGTAATGCGTGATTaaaaaaacaaaaaaaaCTAAAGCCAAACACTTCCCAAGCTGTCATACGCTACCGGAACATAAACGAAGACCTATAACGAAAGTAGCTTTAACACCTTTGAACTCACGACGGTTGAGGAA	0	0	0	0	4	8	0	0	0	0	0	0	0	0	0	0	0	0	0	0	0	5	0	0	0	0	0	0	0	0	0	0	0	0	0	0	143	0
OTU_558	Chordata	Actinopteri	Cypriniformes				95.266	Midori2	GCGGTTAAACGAGAGGCCCCAGTTAATAATACACGGCGTAAAGGGTGGTTAAGGATAAACAAAAATAAAGTCAAATGGCCCCTTGTCCGTCATACGCTTCTAGGAGTCCGAAGCCCTAATACGAAAGTAACTTTAAAACCCACCTGACCCCACGAAAGCTGAGAAA	0	0	4	4	4	5	6	5	2	0	7	3	5	0	2	6	5	4	9	34	16	21	41	0	20	0	4	5	1	12	0	8	3	8	39	41	20	10
OTU_559	Chordata	Actinopteri	Perciformes	Percidae	Perca		95.181	Midori2	GCGGTTATACGAGAGGCCCAAGTTGACAAAAATCGGCGAAAAGCGTGGTTAAGATTAAAGACAATACTAAAGCCGAACACCTTCAGAGCTTACGCATCCGAAGGTAAGAAGTTCAACCACGAAAGTGGCTTTATAGCCCCTGAACCCACGAAAGCTACGATA	0	6	6	4	4	6	7	8	1	3	4	3	2	4	7	4	2	0	2	37	33	20	31	0	21	9	28	33	27	36	19	48	31	27	35	64	25	56
OTU_560	Chordata	Actinopteri	Cypriniformes	Tincidae	Tinca		96.532	Midori2	GCGGTTAAACGAGAGGCCCTAGTTGATATTACTACGGCGTAAAGGGTGGTTAAGGAAAGCATTATAATAAAGCCAAATGGCCCCTTGGCCGTCATACGCTTCTAGTGCCCGAAGCCCAATATACGAAAGTAGCTTTAATAAAGTCCACCTGACCCCACGAAAGCTGAGAAA	0	0	0	0	0	0	0	0	0	0	0	0	0	0	0	0	0	0	0	0	34	15	19	0	44	25	21	20	19	35	0	13	0	151	114	79	32	0
OTU_561	Chordata	Actinopteri	Gobiiformes	Gobiidae	Neogobius		96.988	Midori2	GCGGTTAGACGAGAGGCCCAAGTTGACAAAAATGGGCGAAAAGCGTGGTTAGTGATATCACCTCCACTAAAGCCAAACACCTTCAAGGCTGTAATACGCCCCCGAAGACAGGAAGCCCAATCACGAAAGTAGCTTTAATTTTCATTAAGCCACGAAAGCGAGTAAA	0	2	0	0	2	0	0	2	0	0	0	4	2	0	0	0	0	2	0	40	18	114	0	0	0	22	120	21	0	26	40	25	131	0	40	161	0	0
OTU_565	Chordata	Actinopteri	Perciformes	Percidae	Sander		96.364	Midori2	GCGGTTATACGAGAGGCCCAAGTTGATAGACATCGGCGTAAAGCGTGGTTAAGACAAAAACAAAACTAAAGCCGAACACCTTCAGAGCTGTTATACGCATCCGAAGGTAAGAAGTTCAACCACAAAAGTGGCTTTATAGCCCCCAACCCACGAAAGCTACGATA	0	0	0	0	1	0	0	0	0	0	1	0	0	0	0	0	3	2	0	10	9	7	0	0	4	0	5	2	8	6	0	4	19	11	14	18	18	4
OTU_566	Chordata	Actinopteri	Perciformes	Percidae	Perca		96.364	Midori2	TCGGTTATACGAGAGGCCCAAGTTGATAGACATCGGAAAAGCGTGGTTAAGATTAAAGACAATACTAAAGCCGAACACCTTCAGAGCTGTTATACGCACCCGAAGGTAAGAAGTTCAACCACGAAAGTGGCTTTATTACCCCTGAACCCACGAAAGCTACGATA	0	0	0	0	0	0	0	1	2	1	0	0	0	0	0	0	0	5	0	4	22	20	9	0	5	3	9	12	18	12	0	17	12	11	26	34	39	14
OTU_570	Chordata	Actinopteri	Gobiiformes	Gobiidae			93.373	Midori2	GCGGTTATACGAGAGGCCCAAGTTGACAAAAATCGGCGAAAAGCGTGGTTAGTGATATCACCTCCACTAAAGCCAAACACCTTCAAGGCTGTAATACGCCCCCGAAGGTAGGAAGACCCCTCACGAAAGTAGCTTTTACTATGAATCCACGAAAGCTAGGAAA	0	50	41	16	27	30	15	36	25	14	66	6	20	26	14	28	16	32	29	63	82	86	91	0	64	16	63	51	31	80	0	46	23	86	114	36	56	39
OTU_571	Chordata	Actinopteri	Cypriniformes	Leuciscidae	Leuciscus		95.906	Midori2	GCGGTTAAACGAGAGGCCCTAGTTGATATTACTACGCGTAAAGGGTGGTTAAGGAAAGCATTATAATAAAGCCAAATGGCCCTTTGGCTGTCATACGCTTCTAGGTGTCCGAAGCCCAATATACGAAAGTAGCTTTAATAAAGCCCACCTGACCCCACGAAAGCTGAGAAA	0	0	0	0	0	0	10	0	0	0	0	0	0	0	0	0	9	1	0	0	54	11	23	0	38	39	22	43	22	41	0	23	0	176	133	126	24	0
OTU_572	Chordata	Actinopteri	Cypriniformes	Cyprinidae	Capoeta		95.266	Midori2	GCGGTTAGACGAGAGGCCCTAGTTGATATTACAACGGCGTAAAGGGTGGTTAAGGATAAACAAAAATAAAGCCAAATGGCCCCTTGGCCGTCATACGCTTCTTGTCCGAGGCCCTATATACGAAAGTAGCTTTAATTAACCCGCCTGACCCCACGAAAACTGAAAA	0	0	0	0	0	0	0	0	0	0	1	0	0	0	0	4	0	0	0	7	9	2	0	0	0	0	0	2	0	4	0	0	0	0	0	0	2	0
OTU_573	Chordata	Mammalia	Rodentia	Cricetidae	Microtus	Microtus arvalis	98.113	Midori2	GCGGTCATACGATTAACCCAAACTAATTATTCTCGGCGTAAAACGTGTTACTAGAAATATCAAAATAGAATTAAAATCCATCCATATGTGAAAATTCATCGCTGGACCTAAAACCAATGACGAAAGTAATTCTAATAAGCCTGATACACGAAAGCTACGATA	0	0	0	0	0	0	0	0	0	0	0	0	0	0	0	0	0	0	0	0	0	0	0	0	0	0	0	0	0	0	0	0	5	2	0	0	0	0
OTU_576	Chordata	Actinopteri	Gobiiformes	Gobiidae	Neogobius		96.988	Midori2	GCGGTTATACGAGAGGCCCAAGTTGACAAATCGGCGAAAAGCGCGTTAGTGATATCACCTCCACTAAAGCCAAACACCTTCAAGGCTGTAATACGCCCCCGAAGACAGGAAGCCCAACCACGAAAGTAGCTTTAATTTTCATGAAGCCACGAAAGCTAGGAAA	9	1	4	0	0	3	1	2	0	0	3	4	0	0	1	0	0	0	0	0	0	1	0	0	0	1	0	1	1	1	0	1	5	421	3	0	0	0
OTU_577	Chordata	Actinopteri	Perciformes	Gasterosteidae	Gasterosteus		96.97	Midori2	GCGGTGATACGAGAGGCCCAAGTTGATGAATCACGGCGTAAAGAGTGGTTAAGCTAAAATTAAAACTAAAGCCGAACACCCCCAAAGCTGTTATACGCATCCGGAGGTGAGAAGTTCAACCACGAAGGTGGCTTTATCTAACTTGAACCCACGAAATCTGCGGCA	0	36	12	16	20	13	8	65	86	25	19	39	13	7	17	39	23	17	12	0	0	0	0	0	0	0	0	20	0	0	0	0	0	0	0	0	7	0
OTU_578	Chordata	Actinopteri	Perciformes	Percidae	Perca		96.386	Midori2	GCGGTCATACGAGAGGCCCAAGTTGATAGACATCGGCGTAAAGCGTGGTTAAGACAAAAAACAAAACTAAAGCCGAACACCTTCAGAGCCGTTATACGCATCCGAAGGTAAGAAGTTCAACCACGAAAGTGGCTTTATAGCCCCTGAACCCACGAAAGCTACGATA	0	0	3	2	6	4	0	0	1	6	0	0	4	4	6	0	0	5	0	12	17	23	12	0	7	5	17	12	14	21	0	17	14	24	13	29	33	12
OTU_579	Chordata	Actinopteri	Perciformes	Percidae	Perca		96.988	Midori2	GCGGTTACACGAGAGGCCCAAGTTGATAGACATCGGCGTAAAGCGTGGTTAAGATTAAAGACAATACTAAAGCCGAACACCTTCAGCTGTTATACGCATCCGAAGGTAAGAAGTTCAACCACGAAAGTGGCTTTATAGCCCCTGAACCCACGAAAGCCACGGTA	3	2	6	0	3	2	2	3	3	5	5	2	3	0	0	6	4	5	4	4	12	12	6	6	7	0	8	5	8	5	120	7	4	3	5	7	5	9
OTU_581	Chordata	Actinopteri	Perciformes	Percidae	Sander	Sander lucioperca	100	manual check	GCGGTCATACGATTAACCCAAACTAATTATTCTCGGCGTAAAGCGTGGTTAAGACAAAAACAAAACTAAAGCCGAACACCTTCAGAGCTGTTATACGCACCCGAAGGTAAGAAGTTCAACCACGAAAGTGGCTTTATTACCCCTGAACCCACGAAAGCTACGATA	0	0	0	0	0	0	0	0	0	0	0	0	0	0	0	0	0	0	0	0	0	0	0	0	0	0	0	0	0	0	0	0	7	17	0	0	0	0
OTU_582	Chordata	Actinopteri	Perciformes	Percidae			94.611	Midori2	GCGGTTAAACGAGAGGCCCTAGTTAATAATACACGGCGTAAAGCGTGGTTAAGATTAAAGACAATACTAAAGCCGAACACCTTCAGAGCTGTTATACGCACCCGAAGGTAAGAAGTTCAACCACGAAAGTGGCTTTATTACCCCTGAACCCACGAAAGCTACGATA	112	132	251	240	110	248	281	248	140	219	109	85	204	170	120	459	259	249	316	999	784	977	572	37	510	267	696	640	561	754	33	760	608	614	1555	2007	1154	1102
OTU_584	Chordata	Actinopteri	Perciformes	Percidae	Perca	Perca fluviatilis	97.546	Midori2	GCGGTTATACGAGAGGCCCAAGTTGATAGACATCGGCGTAAAGCGTGGTTAAGATTAAAGACAATACTAAAGCCGAACACCTTCAGAGCTTACGCATCCGAAGGTAAGAAGTTCAACCACGAAAGTGGCTTTATAGCCCCTGAACCCACGAAAGCTACGGCA	0	0	0	0	0	0	0	2	0	1	0	0	0	0	0	2	0	1	0	5	13	13	8	0	5	3	16	13	4	14	0	15	12	2	12	424	3	7
OTU_585	Chordata	Actinopteri	Cypriniformes	Leuciscidae	Leuciscus		95.954	Midori2	GCGGTTAAACGAGAGGCCCCAGTTAATAATACACGGCGTAAAGGGTGGTTAAGGAAAGTATTAATAATAAAGCCAAATGGCCCTTCGGCTGTCATACGCTTCTAGGTGTCCGAAGCCCAATTATACGAAAGTAGCTTTAATAAAGTCCACCTGACCCCACGAAAGCTGAGAAA	0	0	0	2	0	0	4	0	3	0	0	0	0	0	0	2	4	0	0	49	2	4	8	0	5	0	4	4	1	27	0	3	74	13	3	6	3	4
OTU_586	Chordata	Actinopteri	Gobiiformes	Gobiidae	Neogobius		96.951	Midori2	GCGGTTATACGAGAGGCCCAAGTTGACAAAAATCCGCGAAAAGCGTGGTTAGTGATATCACCTCCACTAAAGCCAAACACCTTCAAGTCTGTAATACGCCCCCGAAGACAGGAAGCCCAATCACGAAAGTAGCTTTAATTTTCAAAGCCACGAAAGCTACGATA	0	0	0	0	0	0	0	0	0	0	0	0	0	0	0	0	0	0	0	0	0	0	0	0	0	0	0	3	1	0	0	0	2	2	0	0	0	0
OTU_589	Chordata	Actinopteri	Gobiiformes	Gobiidae	Neogobius	Neogobius melanostomus	98.758	Midori2	GCGGTTATACGAGAGGCCCAAGTTGACAAAAATTGGCGAAAAGCGTGTTTAGTGATATCACCTCCACTAAAGCCAAACACCTTCAAGGCTGTAATACGCCCCCGAAGACAGGAAGCCCAATCACGAAAGTAGCTTTAATTTTCATGAAGCCACGAAAGCTAAAG	0	5	0	1	2	2	1	0	1	4	2	1	0	2	2	3	0	1	7	5	3	3	4	0	6	7	5	1	1	4	1	407	6	19	4	14	9	6
OTU_590	Chordata	Actinopteri	Perciformes	Percidae	Perca		95.181	Midori2	GCGGTTATACGAGAGGCCCAAGTTGACAAAAATCGGCGAAAAGCGTGGTTAAGATTAAAGATAATACTAAAGCCGAACACCTTCAGAGCTGTTATACGCATCCGAAGGTAAGAAGTTTAATTACGAAAGTGGCTTTATAGCCCCTGAACCCACGAAAGCTACGATA	0	2	0	2	0	1	2	3	1	1	0	0	2	0	2	3	1	9	0	14	14	19	17	0	6	8	21	13	5	11	0	11	14	5	15	25	5	24
OTU_591	Chordata	Actinopteri	Cypriniformes	Leuciscidae	Rutilus	Rutilus rutilus	97.661	Midori2	GCGGTTAAACGAGAGGCCCTAGTTGATAATACACGGCGTAAAGGGTGGTTAGGGGAAGCACAATAATAAAGCCAAATGGCCCTTTGGCTGTCATACGCCTCTAGGTGTCCGAAGCCCAATATACGAAAGTAGCTTTAATAAAGCCCACCCGACCCCACGAAAGCTGAGAAA	0	1	16	1	2	3	0	0	4	5	2	0	3	1	6	6	3	6	4	5	0	0	0	0	2	2	0	5	1	3	8	0	4	0	4	0	3	2
OTU_592	Chordata	Actinopteri	Gobiiformes	Gobiidae	Neogobius		96.988	Midori2	GCGGTTATACGAGAGGCCCAAGTTGACAAAAATCGGCGAAAAGCGTGGTTAGTGATATCCTCCACTAAAGCCAGACACCTTCAAGGCTGTAATACGCCCCCGAAGACAGGAAGCCAAATCACGAAAGTAGCTTCAATTTTCATGAAGCCACGAAAGCTAGGAAA	0	2	2	0	1	3	0	2	0	0	4	3	0	1	2	0	4	0	0	3	0	0	0	0	2	1	0	0	2	0	0	0	4	0	1	4	3	1
OTU_595	Chordata	Actinopteri	Perciformes	Percidae			90	Midori2	GCGGTTATACGAGAGGCCCAAGTTGACAAAAATCGGCGAAAAGCGTGGTTAGTGATATCACCTCCACTAAAGCCGAACACCTTCAGAGCTGTTATACGCATCCGAAGGTAAGAAGTTCAACCACGAAAGTGGCTTTATAGCCCCTGACCCCACGAAAGCTGAGAAA	19	37	52	63	67	65	49	76	24	68	27	29	52	44	22	93	54	57	66	987	1180	1226	663	15	213	73	1013	890	367	725	6	719	676	508	1102	1906	1111	678
OTU_596	Chordata	Actinopteri	Cypriniformes	Leuciscidae	Rutilus		95.906	Midori2	GCGGTTAAACGAGAGGCCCTAGTTAATAATACACGGCGTAAAGGGTGGTTAAGGGAAGCACAATAATAAAGCCAAATGGCCCTTTGGCTGTCATACGCTTCTAGGTGTCCGAAGCCCCTAAACGAAAGTAGCTTTAGTACCGCCCACCTGACCCCACGAAAACTGAGAAA	0	0	14	0	0	0	14	0	0	0	0	0	0	0	0	0	0	0	0	3	0	0	0	0	0	0	0	0	0	0	0	0	0	0	0	0	0	0
OTU_597	Chordata	Actinopteri	Cypriniformes				95.266	Midori2	GCGGTTAAACGAGAGGCCCCAGTTAATAATACACGGCGTAAAGGGTGGTTAAGGATAAACAAAAATAAAGTCAAATGGCCCCTCGGCCGTCATACGCTTCTAGGAGTCCGAAGCCCTAATGAAAGTAACTTTAATAAACCCACCTGACCCCACGAAAGCTGAGAAA	0	0	0	2	0	2	0	0	0	0	0	0	3	1	0	1	1	0	3	0	0	0	5	0	2	0	0	1	3	2	0	1	3	0	2	0	12	5
OTU_598	Chordata	Actinopteri	Cypriniformes	Leuciscidae	Leuciscus	Leuciscus leuciscus/idus	98.182	manual check	GCGGTTAAACGAGAGGCCCTAGTTAATAATACACGGCGTAAAGGGTGGTTAAGGAAAGCATAACAATAAAGCCGAATGGCCCTTTGGCCATACGCTTCTAGGTGTCCGAAGCCCAATATACGAAAGTAGCTTTAATAAAGCCCACCTGACCCCACGAAAGCTACGATA	0	0	0	0	1	0	3	0	3	2	0	2	2	0	2	3	1	0	3	9	0	10	6	0	7	2	357	5	6	9	0	5	7	14	19	22	11	6
OTU_599	Chordata	Actinopteri	Perciformes	Percidae	Perca		96.988	Midori2	GCGGTTAAACGAGAGGCCCCAGTTGATAGACATCGGCGTAAAGCGTGGTTAAGATTAAAGACAATACTAAAGCCGAACACCTTCAGAGCTGTTATACGCATCCGAAGGTAAGAAGTTCAACCACAAAAGTGGCTTTATAGCCCCCAACCCACGAAAGCTACGATA	4	10	16	9	3	17	13	9	12	10	12	5	6	9	5	17	14	14	14	34	30	43	35	0	29	14	13	13	18	28	3	22	35	15	30	56	29	33
OTU_600	Chordata	Actinopteri	Gobiiformes	Gobiidae	Neogobius		96.386	Midori2	GCGGTTATACGAGAGGCCCAAGTTGATAGACATCGGCGAAAAGCGTGGTTAGTGATATCACCTCCACTAAAGCCAAACACCTTCAAGCTGTAATACGCCCCCGAAGACATGAAGCCCAATCACGAAAGTAGCTTTAATTTTCATGAAGCCACAAAAGCTAGGAAA	0	3	1	0	0	0	5	4	0	4	0	1	2	2	0	3	5	2	1	623	48	46	28	0	25	22	58	59	104	58	0	34	34	42	59	88	46	32
OTU_601	Chordata	Actinopteri	Cypriniformes	Leuciscidae	Squalius	Squalius cephalus	97.093	Midori2	GCGGTTAAACGAGAGGCCCTAGTTAATAATACACAGCGTAAAGGGTGGTTAAGGAAAACATAACAATAAAGCCTAATGGCCCTTTTGGCTGTCATACGCTTCTAGGTGTCCGAAGCCCAATATACGAAAGTAGCTTTAATAAAGTCCACCTGACCCCACGAAAGCTAGGAAA	0	137	109	172	167	210	167	230	177	153	98	218	91	186	218	259	77	201	133	141	176	55	149	0	169	110	139	154	88	275	0	202	104	154	216	158	260	462
OTU_603	Chordata	Actinopteri	Gobiiformes	Gobiidae	Neogobius		96.988	Midori2	GCGGTTATACGAGAGGCCCAAGTTGACAAAAATCGGCGAAAAGCGTGGTTAGTGATATCACCTCCACTAAAGCCAAACACCTTCAAGGCTGTAATACGCCCCCGACACAGGAAGCCCAATCACGAAAGTAGCTTTAATTTTCAAAGCCACGAAGGCTAGGAAA	0	0	0	0	0	0	0	0	0	0	0	0	0	0	1	0	0	0	0	0	0	0	0	0	0	0	0	0	0	0	0	0	1	0	0	0	0	0
OTU_604	Chordata	Actinopteri	Perciformes	Percidae	Perca		96.386	Midori2	GCGGTTATACGAGGGGCTCAAATTGATAGACATCGGCGTAAAGCGTGGTTAAGATTAAAGACAATACTAAAGCCGAACACCTTCAGAGCTGTTATACGCACCCGAAGGTAAGAAGTTCAACCACGAAAGTGGCTTTATTACCCCTGAACCCACGAAAGCTACGATA	0	0	2	0	0	7	0	3	1	5	0	0	2	0	0	0	2	6	3	13	15	17	10	0	11	3	22	7	18	16	0	26	25	22	19	37	30	21
OTU_608	Chordata	Actinopteri	Perciformes	Percidae	Perca	Perca fluviatilis	98.125	Midori2	GCGGTTATACGAGAGGCCCAATTTGATAGACATCGGCGTAAAGCCTGGTTAAGATTAAAGACAATACTAAAGCCGAACACCTTCAGAGCTGTTATACCCATCCGAAGGTAAGAAGTTCAACCACGAAAGTGGCTTTATAGCCCCTGAACCCACGAAAGCTGAGAAA	0	0	0	0	0	0	0	0	0	0	0	0	0	0	0	0	0	0	0	0	0	2	1	0	0	0	0	0	0	0	0	0	0	0	2	3	366	0
OTU_609	Chordata	Actinopteri	Cypriniformes	Leuciscidae	Rutilus	Rutilus rutilus	98.235	Midori2	TCGGTTAAACGAGAGGCCCTAGTTAATAATACACGGCGTAAAGGGTGGTTAAGGGAAGCACAATAATAAAGCCAAATGGCCCTTTGGCTGTCATACGCTTCCAGGCGTCCGAAGCCAAATATACGAAAGTAGCTTTAATAAAGCCCACCTGACCCCACGAAAGCTGAGAAA	0	3	32	28	15	13	3	0	27	16	16	0	21	11	3	27	3	17	0	11	3	11	14	0	13	3	4	9	11	5	14	14	10	12	20	113	36	11
OTU_612	Chordata	Actinopteri	Gobiiformes	Gobiidae	Neogobius		96.988	Midori2	GCGGTTATACTTGAGGCCCAAGTTGACAAAAATTGCGAAAAGCGTGGTTAGTGATATCACCTCCACTAAAGCCAAACACCTTCAAGGCTGTAATACGCCCCCGAAGACAGGAAGCCCAATCACGAAAGTAGCTTTAATTTTCATGAAGCCACGAAATCTAGGAAA	0	0	0	0	0	0	0	0	0	0	0	0	0	0	0	0	0	0	0	0	0	2	0	0	0	4	0	0	0	421	0	0	2	0	0	0	0	0
OTU_613	Chordata	Actinopteri	Cypriniformes	Leuciscidae	Rutilus	Rutilus rutilus	97.093	Midori2	GCGGTTAAACGAGAGGCCCCAGTTGATAACACCACGGCATAAAGGGTGGTTAAGGGAAGCACAATAATAAAGCCAAATGGCCCTTTGGCTGTCATACGCTTCTAGGTGTCCGAAGCCCAATATACGAAAGTAGCTTTAATAAAGCCCACCTGACCCCACGAAAGCTGAGAAA	0	0	3	1	0	22	1	4	2	0	5	0	3	1	0	6	0	0	0	19	0	0	0	0	0	0	0	0	0	0	0	11	0	0	0	0	0	0
OTU_614	Chordata	Actinopteri	Cypriniformes	Leuciscidae			93.567	Midori2	GCGGTTAAACGAGGGGCCCTAGTTAATAATACGCGGCGTAAAGGTGGTTAAGGAAAGCATAACAATAAAGTCAAATGGCCCCTTGGCCGTCATACGCTTCTAGGAGTCCGAAGCCCTAATACGAAAGTAACTTTAATAAACCCACCTGACCCCACGAAAGCTGAGAAA	0	0	0	0	0	3	0	0	3	0	9	11	0	0	7	6	0	0	3	12	8	9	5	0	22	0	3	9	11	5	0	0	1	0	23	15	3	4
OTU_615	Chordata	Actinopteri	Perciformes	Gasterosteidae			94.444	Midori2	GCGGTTATACGAGAGGCCCAAGTTGATAGACATCGGCGTAAAGCGTGGTTAAGCTAAAATTAAAACTAAAGCCGAACACCCCCAAAGCTGTTATACGCATCCGGAGGTGAGAAGTTCAACCACGAAGGTGGCTTTATCGCCCCTGAACCCACGAAAGCTACGATA	0	3	0	0	0	1	0	3	0	2	0	0	1	0	0	1	0	1	0	4	30	17	4	0	4	0	16	30	6	11	0	18	14	10	26	40	17	10
OTU_616	Chordata	Actinopteri	Cypriniformes				95.322	Midori2	GCGGTTAAACGAGAGGCCCCAGTTAATAATACACGGCGTAAAGGGTGGTTAAGGATAAACAAAAATAAAGTCAAATGGCCCCTTGGCCGTCATACGCTTCTAGGAGTCCGAAGCCCTAATACGAAATTCCAACTTTAATAAACCCACCTGACCCCACGAAAGCTGAGAAA	0	146	420	484	311	790	599	377	265	156	317	530	491	378	433	727	618	560	860	686	793	934	879	143	820	149	441	304	235	1059	75	744	523	468	998	1013	743	719
OTU_617	Chordata	Actinopteri	Cypriniformes	Leuciscidae	Leuciscus		96.491	Midori2	GCGGTTAAACGAGAGGCCCCAGTTAATAATACACGGCGTAAAGGGTGGTTAAGGAAAGCATTATAATAAAGCCAAATGGCCCCTTGGCCGTCATACGCTTCTAGGTGCCCGAAGCCCAATATACGAAAGTAGCTTTAATAAAGCCCACCTGACCCCACGAAAGCTGAGAAA	0	0	0	0	0	3	1	0	0	0	0	0	0	0	0	1	0	0	0	4	13	6	7	0	3	4	2	8	0	3	0	4	3	14	10	30	2	1
OTU_619	Chordata	Actinopteri	Perciformes	Percidae	Perca		96.386	Midori2	GCGGTTATACGAGAGGCCCAAGTTGATAGACATCGGCGTAAAGCGTGGTTAAGATTAAAGACAATACTAAAGCCAAACACCTTCAAGGCTGTAATACGCCCCCGAAGGTAAGAAGTTCAACCACGAAAGTGGCTTTATAGCCCCTGAACCCACGAAAGCTACGATA	0	0	0	0	0	0	1	0	0	3	1	0	0	0	0	0	0	0	0	8	21	25	7	0	2	3	21	21	16	6	0	11	14	5	20	21	27	8
OTU_620	Chordata	Actinopteri	Perciformes	Gasterosteidae			92.593	Midori2	GCGGTTATACGAGAGGCCCAAGTTGACAAAAATCGGCGAAAAGCGTGGTTAAGCTAAAATTAAAACTAAAGCCGAACACCCCCAAAGCTGTTATACGCATCCGGAGGTGAGAAGTTCAACCACGAAAGTGGCTTTATAGCCCCTGAACCCACGAAAGCTACGATA	0	0	0	0	0	0	0	0	0	0	0	0	0	0	0	0	0	0	0	5	3	3	0	0	4	1	5	7	1	3	0	7	2	2	0	8	3	0
OTU_621	Chordata	Actinopteri	Perciformes	Percidae	Sander	Sander lucioperca	98.148	manual check	GCGGTTATACGAGAGGCCCAAGTTGATAGACATCGGCGTAAAGTGTGGTTAAGACAAAAACAAAACTAAAGCCGAACACCTTCAGAGCTGTTATACGCACCCGAAGGTAAGAAGTTCAACCACGAAAGTGGCTTTATAGCCCCTGAACCCACGAAAGCTACGGCA	0	1	0	5	2	14	0	9	2	12	1	0	5	1	1	0	1	12	2	16	45	38	38	0	22	29	65	29	22	130	0	40	42	59	55	124	70	60
OTU_622	Chordata	Actinopteri	Cypriniformes				95.266	Midori2	GCGGTTAAACGAGAGGCCCCAGTTAATAATACACGGCGTAAAGGGTGGTTAAGGATAAACAAAAATAAAGTCAAAAGGCCTTGGCCGTCATACGCTTCTAGGAGTCCGAAGCCCTAATACGAAAGTAACTTTAATAAACCCACCTGACCCCACGAAAGCTGAGAAA	0	0	8	11	5	11	11	7	3	4	9	13	10	4	7	15	11	8	12	11	28	15	21	0	19	2	6	3	7	20	1	22	7	5	29	21	15	20
OTU_623	Chordata	Actinopteri	Gobiiformes	Gobiidae	Neogobius		96.988	Midori2	GCGGTTATACGAGAGGCCCAATTTGACAAAAGTCGGCGAAAAGCGTGGTTAGTGATATCACCTCCACTAAAGCCAAACACCTTCAAGGCTGTAATACGCCCCCGAATACAGGAAGCCCAATCACGAAAGTAGCTTTAATTTTCATGAAGCCAAAAGCTAGGAAA	0	0	0	0	0	0	0	0	0	0	0	0	0	0	0	0	0	0	0	2	2	1	3	0	0	0	2	0	0	4	0	0	257	1	0	1	2	2
OTU_624	Chordata	Actinopteri	Perciformes	Percidae	Perca	Perca fluviatilis	98.125	Midori2	GCGGTTATACGAGAGGCCCAAGTTGATAGACATCGGCGTAAAGCGTGGTTAAGATTAAAGACAATACTAAAGCCGAACACCTTCAGAGCTGTTATACGCATCCGAAGGTAAGAAGTTCAACCACGAAAGTGGCTTTACCCCCCTGAACCCACGAAAGCTGAGAAA	0	4	10	4	3	8	4	5	3	5	5	2	1	7	4	12	4	7	7	59	47	81	34	1	22	1	465	408	35	53	0	69	37	37	72	168	58	79
OTU_628	Chordata	Actinopteri	Gobiiformes	Gobiidae	Neogobius	Neogobius melanostomus	97.561	Midori2	GCGGTTATACGAGAGGCCCAAGTTGACAAAAATCGGCAAAAGCGTGGTTAGTGATATCACCTCCACTAAAGCCAAACACCTTCAAGGCTGTAATACGCCCCCGAAGACGAAGCCCAATCACGAAAGTAGCTTTAATTTTCATGAAGCCACGAAAGCTACGATA	0	0	0	0	0	0	0	0	0	0	0	0	0	0	0	0	0	0	2	0	0	2	5	0	0	0	6	24	4	0	0	5	168	6	13	6	5	3
OTU_629	Chordata	Actinopteri	Cypriniformes	Cyprinidae			93.605	Midori2	GCGGTTAGACGAGAGGCCCTAGTTGATATTATAACGGCTTAAAGGGGTTAGGGATAAATAATAATAAAGCCAAATGGCCCCTTGGCCGTCATACGCTTCTAGGTGTCCGAAGTTCAACATACGAAAGTAGCTTTAATAACGCCCACCTGACCCCACGAAAGCTGAGAAA	0	764	376	470	191	443	185	180	198	66	253	72	261	135	143	196	226	151	271	320	1006	459	364	45	258	150	172	252	48	322	53	123	140	220	103	160	242	85
OTU_630	Chordata	Actinopteri	Gobiiformes	Gobiidae	Neogobius	Neogobius melanostomus	97.531	Midori2	GGTTATACGAGAGGCCCAAGTTGACAAAAATCGGCGAAAAGCGTGGTTAGTGATATCACCTCCACTAAAGCCAAACACTTTCAAGGCTGTAATACGCCCCCGAAGACAGGAAGCACAATCACGAAAGTAGCTTTAATTTTCATGAACCCACGAAAGCTACGATA	5	6	14	10	3	9	5	7	6	7	5	4	9	8	10	12	4	9	10	30	30	19	20	2	17	16	29	35	36	29	0	32	17	37	37	54	35	24
OTU_631	Chordata	Actinopteri	Gobiiformes	Gobiidae	Neogobius		96.988	Midori2	GCGGTTATACGAGAGGCCCAAGTTTACAAAAATCGGCGAAAAGCGTGGTTAGTGATATCACCTCCACTAAAGCCAAAGACCTTCAAGGCTGTAATACGCCCCCGAAGACAGGAAGCCCAATCGCGAAAGTAGCTTTAATTTTCATGAAGCCAAAAGCTAGGAAA	0	0	0	0	0	0	0	0	0	0	0	0	0	0	0	0	0	0	0	383	0	0	0	0	0	0	0	0	0	0	0	0	0	0	0	0	0	0
OTU_635	Chordata	Actinopteri	Cypriniformes				93.491	Midori2	GCGGTTAGACGAGAGGCCCTAGTTGATATTATAACGGCGTAAAGGGTGGTTAGGGATAAATAATAATAAAGCCAAATGGCCCCTTGGCCGTCATACGCTTCTAGGAGTCCGAAGCCCTAATACGAAAGTAATAAACCCACCTGACCCCACGAAAGCTGAGAAA	0	0	0	0	0	0	0	0	0	0	0	0	0	0	0	0	0	0	0	0	0	0	0	0	0	0	0	0	0	0	0	0	0	0	2	0	0	0
OTU_637	Chordata	Actinopteri	Cypriniformes	Leuciscidae	Rutilus	Rutilus rutilus	97.661	Midori2	GCGGTTAAACGAGAGGCCCTAGTTAATAATACACGGCGTAAAGGGTGGTTAAGGGAAGCACAATAATAAAGCCAAATGGCCCTTTGGCTGTCATACGCTTCTAGGTATCCGAAGCCCAATATACGAAAGTAGCTTTAACAAAGTCCACCTGACGCCACGAAAGCTGAGAAA	0	3	6	1	2	0	0	2	4	4	0	2	1	0	4	15	0	14	3	2	0	0	0	0	0	2	2	2	0	1	1	2	0	3	2	21	2	23
OTU_638	Chordata	Actinopteri	Gobiiformes	Gobiidae	Neogobius		95.783	Midori2	GCGGTTATACGAGAGGCCCAAGTTGACAAAAATCGGCGAAAAGCGTGGTTAGTGATATCACCTCCACTAAAGCCATACCTTCAAGGCTGTAATACGCCCCCGAAGACAGGAAGCCCAATCACGAAAGTAGCTTTAATTACTATGAATCCACGAAAGCTAGGAAA	0	1	2	1	0	3	0	4	0	0	1	0	5	3	0	6	4	0	0	16	9	26	10	0	4	2	14	7	4	17	0	7	1	11	19	5	11	5
OTU_639	Chordata	Actinopteri	Cypriniformes	Leuciscidae			96.491	Midori2	GCGGTTAAACGAGAGGCCCCAGTTAATAATACACGGCGTAAAGGGTGGTTAGGGATAAATAATAATAAAGCCAAATGGCCCTTTGGCTGTCATACGCTTCTAGGTGTCCGAAGCCCAATATACGAAAGTAGCTTTAATAAAGCCCACCTGACCCCACGAAAGCTGAGAAA	0	3	7	5	0	3	10	2	1	2	7	2	2	5	3	9	4	6	11	9	18	12	11	0	4	0	3	15	5	22	0	18	11	21	27	74	28	9
OTU_640	Chordata	Actinopteri	Gobiiformes	Gobiidae	Neogobius	Neogobius melanostomus	98.16	Midori2	GCGTTATACGAGATGCCCAAGTTGACAAAAATCGGCGAAAAGCGTGGTTAGTGATATCACCTCCACTAAAGCCAAACACCCTCAAGGCTGTAATACGCCCCCGAAGACAGGAAGCCCAATCACGAAAGTAGCTTTAATTTTCATGAGGCCACGAAAGCTAGGAAA	23	7	20	12	8	5	8	16	9	6	4	7	4	18	7	10	7	11	6	6	4	10	4	32	12	0	4	8	2	6	13	18	3	13	6	10	35	12
OTU_641	Chordata	Actinopteri	Perciformes	Percidae	Perca		96.988	Midori2	GCGGTTATACGAGAGGCCCAAGTTGATAGACATCGGCGTAAAGCGTGGTTAAGATTAAAGACAATACTAAAGCCGAACACCTTCAGAGCTGTTATACGCATCCGGAGGTGAGAAGTTCAACCACGAAGGTGGCTTTATTACCCCTGAACCCACGAAAGCTACGATA	0	0	0	0	4	0	1	6	1	5	1	0	3	1	0	3	3	6	4	22	79	42	29	0	15	12	29	76	24	44	0	37	22	22	86	117	52	18
OTU_643	Chordata	Actinopteri	Cypriniformes	Cyprinidae	Spinibarbus		95.882	Midori2	GCGGTTAGACGAGAGGCCCTAGTTGATATTATATGGCGTAAAGGGTGGTTAGGGAAATAATAATAAAGCCAAATGGCCCCTTGGCCGTCATACGCTTCTAGGTGTCCGAGGCCCTATATACGAAAGTAGCTTTAATAAAGCCCACCTGACCCCACGAAAGCTGAGAAA	0	3	3	1	0	0	1	0	0	0	3	0	0	1	4	4	0	1	0	11	7	2	68	0	5	0	2	13	0	8	0	22	6	0	4	3	31	5
OTU_644	Chordata	Actinopteri	Cypriniformes				96.471	Midori2	GCGGTTAGACGAGAGGCCCTAGTTGATATTACAACGGCGTAAAGGGTGGTTAAGGATAAACAAAAATAAAGTCAAATGGCCCCTTCCGTCATACGCTTCTAGGAGTCCGAAGCCTTAATACGAAAGTAGCTTTAATAACGCCCACCTGACCCCACGAAAGCTGAGAAA	0	0	2	0	0	0	2	0	2	0	0	0	0	0	0	0	0	0	0	7	0	9	0	0	0	0	0	0	1	1	0	2	2	1	3	0	1	4
OTU_645	Chordata	Actinopteri	Cypriniformes	Leuciscidae	Chondrostoma		96.512	Midori2	GCGGTTAGACGAGAGGCCCTAGTTGATATTACAACGGCGTAAAGGGTGGTTAAGGAAAGCATAACAATAAAGCCGAATGGCCCTTTGGCTGTCATACGCTTCTAGGTGTCCGAAGCCCGTTATACGAAAGTAGCTTTAACAACGCCCACCTGACCCCACGAAAGCTGAGAAA	0	0	5	0	0	19	0	4	0	0	1	0	2	0	6	6	1	55	0	5	8	9	2	0	5	0	1	2	0	18	0	5	6	6	15	14	13	4
OTU_646	Chordata	Actinopteri	Cypriniformes	Leuciscidae	Leuciscus		96.491	Midori2	GCGGTTAAACGAGAGGCCCTAGTTAACAATGCACGGCGTAAAGGGTGGTTAAGGAAAGCACAATAATAAAGCCAAATGGCCCTTTGGCTGTCATACGCTTCTAGGTGTCCGAAGCCCTAATACGAAAGTAACTTTAATAAACCCACCTGACCCCACGAAAGCTGAGAAA	0	0	0	0	21	36	60	10	10	15	25	0	0	17	21	63	10	12	9	0	31	24	124	0	41	14	11	35	55	49	0	44	51	39	166	55	13	16
OTU_647	Chordata	Actinopteri	Gobiiformes	Gobiidae	Neogobius		96.988	Midori2	GCGGTTATACGAGAGGCCCAAGTTGACAAAAATCGGCGAAAAGCGTGGTTAGTGATATCACCTCCACTAAAGCCAAACACCTTCAAGGCTGTAATACGCCCCCGAAGACAGGAAGCCCAATCACGAAAGTTTTTAATTTTCATGAAGCCACGAAAGCTGAGAAA	19	29	32	37	12	37	30	28	24	15	26	29	18	32	31	49	35	27	41	68	42	45	45	0	36	20	54	42	19	279	6	43	53	48	73	82	269	54
OTU_648	Chordata	Actinopteri	Gobiiformes	Gobiidae	Neogobius	Neogobius melanostomus	98.802	Midori2	GCGGTTATACGAGAGGCCCAAGTTGACAAAATCGGCGAAAAAGCGTGGTTAGTGATATCACCTCCACTAAAGCCAAACACCTTCAAGGCTGTAATACGCCCCCGAAGACAGGAAGCCCAATCACGAAAGTAGCTTTAATTTTCATGAAGCCACGAAAGCTAGGAAA	18	9	33	10	1	1	12	0	2	0	0	5	3	20	4	1	2	45	0	121	22	73	12	0	85	0	34	39	13	90	20	49	45	25	18	47	36	53
OTU_649	Chordata	Actinopteri	Gobiiformes	Gobiidae	Neogobius		96.951	Midori2	GCGGTTATACGAGGGGCTCAAGTTGACAAAGATCGGCGTAAAGCGTGGTTAATGATAGTTCCACTAAAGCCAAAACACCTTCAAGGCTGTTATACGCCCCCGAAGACAGGAAGACCCATCACGAAAGTAGCTTTAATCTTCATGAACCCACGAAAGCTAGGAAA	0	0	0	0	0	0	0	0	0	0	0	0	0	0	0	0	0	0	0	0	0	0	0	0	0	0	0	0	0	702	0	0	1	0	0	0	0	0
OTU_650	Chordata	Actinopteri	Gobiiformes	Gobiidae	Neogobius		96.386	Midori2	GCGGTTATACAGGCCCAAGTTGACAAAAATCGGCGAAAAGCGTGGTTAGTGATATCACCTCCACTAAAGCCAAACACCTTCAAGGCCGTAATACGCCCCCGAAGACAAAGCCCAATCACGAAAGTAGCTTTAATTTTCATGAAGCCACGAAAGCTAGGAAA	0	0	0	0	0	0	0	0	0	0	0	0	0	0	0	0	0	0	0	0	0	0	0	0	0	0	0	0	0	0	0	2	0	0	0	0	0	0
OTU_651	Chordata	Actinopteri	Cypriniformes	Leuciscidae	Squalius	Squalius cephalus	97.076	Midori2	GCGGTTAAACGAGAGGCCCTAGTTAATAATACACGGCGTAAAGGGTGGCTAAGGAAAACATAACAATAAAGCCGAATGGCCCTTTGGCTGTCATACGCTTCTAGGTGTCCGAAGCCCAATATATAAAAGTAGCTTTAATAAAGTCCACCTGGCCCCACGAAAGCTGAGAAA	0	10	12	23	14	11	17	14	9	4	8	11	4	14	11	12	0	9	13	1	11	0	3	0	665	7	3	2	4	18	0	4	11	2	4	3	6	21
OTU_652	Chordata	Actinopteri	Perciformes	Percidae	Perca	Perca fluviatilis	97.561	Midori2	GCGGTTATACGAGAGGCCCAAGTTTTAGACATCGGCGTAAAGCGTGGTTAAGATTAAAGACAATACTAAAGCCGAACACCTTCAGAGCTGTTATACGCATCCGAAGGTAAGAAGTTCAACCACGAAAGTGGCTTTATAGCCCCTGAAGCCACGAAAGCTAGGAAA	37	93	108	110	86	111	107	126	65	118	77	66	74	71	81	110	112	100	107	263	243	237	187	23	145	102	266	233	152	218	21	301	235	186	263	320	233	230
OTU_653	Chordata	Actinopteri	Cypriniformes	Leuciscidae	Rutilus	Rutilus rutilus	97.661	Midori2	GCGGTTAAACGAGAGACCCTAGTTAATAATACACGGCGTAAAGGGCGGCTAAGGGAAGCACAATAATAAAGCCAAATGGCCCTTTGGCTGTCATACGCTTCTAGGTGTCCGAAGCCCAATATACGAAAGTAGCTTTAATGAAGCCCACCTGACCCCACGAAAGCTGAGAAA	0	8	9	0	2	6	3	0	4	4	6	1	3	12	0	28	0	5	3	7	3	1	0	0	3	6	3	0	13	4	867	5	4	2	5	3	0	1
OTU_657	Chordata	Actinopteri	Cypriniformes	Cyprinidae			90	Midori2	GCGGTTAGACGAGAGGCCCTAGTTGATATTACAACGGCGTAAAGGGTGGTTAAGGATAAACAAAAATAAAGTCAAATGGCCCCTTGGCCGTCATACGCTTCTAGGTGTCCGAAGTTCAACATACGAAAGTAGCTTTAATTTTCATGAAGCCACGAAAGCTAGGAAA	0	0	0	1	0	0	0	0	0	0	0	0	0	0	1	6	0	0	0	3	5	3	6	0	3	0	6	1	2	7	0	6	6	0	20	17	9	6
OTU_658	Chordata	Mammalia	Rodentia	Cricetidae	Microtus	Microtus arvalis	98.113	Midori2	GCGGTCATACGATTAACCCAAACTAATTATTCTCGGCGTAAAACGTGTTACTAGAGTATGCAAAATAGAATTAAAATCCATCCAATATGTGAAAATTCATCGCTGGACCTAAAACCAATGACGAAAGTAATTCTAATAAGCCTGATACACGAAAGCTACGATA	0	0	0	0	0	0	0	0	0	0	0	0	0	15	0	0	0	1	0	0	6	0	0	0	0	21	4	12	3	0	0	8	174	208	0	15	6	34
OTU_662	Chordata	Mammalia	Rodentia	Cricetidae	Microtus		96.951	Midori2	GCGGTCATACGATTAACCCAAACTAACTATTCTCGGCGTAAAACGTGTTACTATACATATAAAAAATAGAATTAAAATCCATCCAATATGTGAAAATTCATCGCTGGACCTAAAACCAATGACGAAAGTAATTCTAATAAGCCTGATACACGATAGCTAAGGTA	0	0	0	0	0	0	0	0	0	0	0	0	0	0	0	0	0	0	0	0	0	0	0	0	0	0	0	13	5	0	0	0	0	0	0	0	0	0
OTU_663	Chordata	Mammalia	Artiodactyla	Bovidae			96.951	Midori2	GCGGTCGTACGATTAACCCAAGCTAACAGGAGTACGGCGTAAAGCGTGTTAAAGCACCATACCAAATAGGGTTAAATTCTAACTAAGCTGTAAAAAGCCATGATTAAAATAAAAATAAATGACGAAAGTGACCCTACAATAGCCGCACTATAGCTAAGACC	4	0	0	0	0	0	0	0	0	0	0	1	0	1	0	0	0	0	0	0	0	0	0	0	0	0	0	0	0	0	0	0	0	0	0	0	0	0
OTU_664	Chordata	Actinopteri	Gobiiformes	Gobiidae	Neogobius		95.181	Midori2	GCGGTTATACGAGAGGCCCAAGTTGATAGACATCGGCGTAAAGCGTGGTTAGTGATATCACCTCCACTAAAGCCAAACACCTTCAAGGCTGTAATACGCCCCCGAAGACAGGAAGACCCATCACGAAAGTAGCTTTAATCTTCATGAACCCACGAAAGCTAGGAAA	0	2	1	4	0	1	4	2	2	5	3	7	3	3	3	6	8	5	3	13	25	17	16	0	8	6	25	14	16	22	0	14	17	11	27	27	19	13
OTU_665	Chordata	Actinopteri	Cypriniformes	Leuciscidae			94.186	Midori2	GCGGTTATACGAGAGGCCCAAGTTAATAATACACGGCGTAAAGGGTGGTTAAGGAAAGTATTAACAATAAAGCCAAATGGCCCCTTGGCCGTCATACGCTTCTAGGAGTCCGAAGCCCTAATACGAAAGTAGCTTTAATAAAGCCCACCTGACCCCACGAAAGCTGAGAAA	0	0	0	0	0	3	3	0	4	1	3	1	1	2	0	5	5	5	5	13	21	29	9	0	12	0	9	6	8	16	0	18	7	7	18	34	25	9
OTU_666	Chordata	Actinopteri	Gobiiformes	Gobiidae	Neogobius		96.988	Midori2	GCGGTTATACGAGAGGCCCAAGTTGACAAAAATCGGCGAAAAGCGTGGTTAGTGATAATTCCACTAAAGCCAAACACCTTCAAGGCTGTAATACGCCCCCGAAGACAGGAAGCCCAATCACGAAAGTAGCTTTAATTTTCATGAAGCCACGAAAGCTAGGAAA	0	13	5	2	0	8	2	1	4	1	0	6	2	3	1	0	2	2	0	4	19	0	7	0	5	14	3	2	3	10	0	4	51	10	8	15	0	0
OTU_667	Chordata	Actinopteri	Cypriniformes	Leuciscidae	Leuciscus		96.491	Midori2	GCGGTTAAACGAGAGGCCCCAGTTAATAATACACGGCGTAAAGGGTGGTTAAGGAAAGTTAACAATAAAGCCGAATGGCCCTTTGGCTGTCATACGCTTCTAGGTGTCCGAAGCCCATACGAAAGTAGCTTTAATAAAGCCCACCTGACCCCACGAAAGCTGAGAAA	0	0	0	1	0	3	5	1	0	0	0	0	0	0	0	0	0	0	0	4	0	0	9	0	0	0	0	12	0	6	0	9	3	9	4	9	3	0
OTU_668	Chordata	Actinopteri	Cypriniformes				95.266	Midori2	GCGGTTAAACGAGAGGCCCTAGTTAATAATACACGGCGTAAAGGGTGGTTAAGGATAAACAAAAATAAAGTCAAATGGCCCCTTGGCCGTCATACGCTTCTAGGAGTCCGAAGCCCTAATACGAAAGTAGCTTTAATTAACCCGCCTGACCCCACGAAAACTGAGAAA	0	4	0	2	0	1	2	0	0	0	0	0	4	1	0	10	4	7	4	17	35	12	12	0	3	3	6	7	3	29	0	25	10	9	40	28	42	14
OTU_669	Chordata	Actinopteri	Perciformes	Percidae	Perca	Perca fluviatilis	98.758	Midori2	GCGGTTATGCGAGAGGCCCAAGTTGATAGACATCGGCGTAAAGCGTGGTTAAGATTAAAGACAATACTAAAGCCGAACACCTTCAGAGCTGCTATACGCATCCGAAGGTAAGAAGTTCAACCACGAAAGTGGCTTTATAGCCCCTGAACCCACGAAAGCTAGGGAA	7	0	9	6	6	3	11	10	4	12	3	1	1	4	1	14	7	2	0	18	15	24	8	4	15	17	18	10	9	13	4	20	8	10	18	26	12	11
OTU_670	Chordata	Actinopteri	Cypriniformes	Leuciscidae			94.253	Midori2	GCGGTTAAACGAGAGGCCCCAGTTAATAATACACGGCGTAAAGCGTGGTTAAGATTAAAGACAATACTAAAGCCGAATGGCCCTTTGGCTGTCATACGCTTCTAGGTGTCCGAAGTTCAACATACGAAAGTAGCTTTAATAACGCCCACCTGACCCCACGAAAGCTGAGAAA	0	0	0	0	0	0	0	0	0	0	0	0	0	0	0	0	0	0	0	3	2	5	0	0	0	0	4	1	0	1	0	2	0	0	1	7	7	4
OTU_671	Chordata	Actinopteri	Gobiiformes	Gobiidae	Neogobius		96.988	Midori2	GCGGTTATACGAGAGGCCCAAGTTGACAAAAATCGGCGAAAAGCGTGGTTAGTGATATCACCTCCACTAAAGCCAAACACCTTCAAGGCTGTAATACGCCCCCGAAGACAGGAAGCCCAATCACGAAAGTAGCTTTAACTATGAATCCACGAAAGCTAGGAAA	3	12	13	3	4	12	5	3	5	3	10	11	8	5	4	5	3	3	10	36	38	23	50	2	13	10	32	27	10	55	3	14	18	41	34	17	26	14
OTU_672	Chordata	Mammalia	Rodentia	Cricetidae	Microtus		96.951	Midori2	GCGGTCAGACGATTAACCCAAACTAATTATTCTGGGCGTAAAACGTGTTACTAGAAATATGCAAAATAGAATTAAAATCCATCCAATATGTGAAAATTCATCGCTGGACCTAAAACCAATGACGAAAGTAATTCTAATAAGCCCGATACACGATAGCGAACGTA	0	0	0	0	0	0	0	0	0	0	0	0	0	0	0	0	0	0	0	0	0	0	0	0	0	0	0	0	0	0	0	0	38	0	0	0	0	0
OTU_675	Chordata	Actinopteri	Gobiiformes	Gobiidae	Neogobius		96.988	Midori2	GCGGTTATACGAGGCCCAAGTTGACAAAAATCGGCAAAAGCGTGGTTAGTGATATCACCTCCACTAAAGCCAAACACCTTCAAGCCTGTAATACGCCCCCGAAGACAGGAAGCCCAATCACGAAAGTAGCTTTAATTTTCATGAAGCCACGGAAGCTAGGAAA	0	0	0	0	0	0	0	0	0	0	0	0	0	0	0	0	0	0	0	0	0	0	7	0	3	5	0	2	3	0	0	181	3	3	0	0	2	0
OTU_676	Chordata	Actinopteri	Cypriniformes	Leuciscidae	Abramis		96.512	Midori2	GCGGTTAAACGAGAGGCCCCTAAATAATACACGGCGTAAAGGGTGGTTAAGGAAAGCATAACAATAAAGCCGAATGGCCTTTTGGCTGTCATACGCTTCTAGGTGTCCGAAGTTCAACATACGAAAGTAGCTTTAATAACGCCCACCTGACCCCACGAAAGCTGAGAAA	0	0	0	0	0	0	1	0	2	0	0	0	0	1	1	0	0	0	0	11	25	7	97	0	1	0	8	18	3	13	0	5	23	30	21	49	28	24
OTU_677	Chordata	Actinopteri	Cypriniformes	Leuciscidae			94.186	Midori2	GCGGTTAGACGAGAGGCCCTAGTTGATATTACAACGGCGTAAAGGGTGGTTAAGGGGACACAATAATAAAGCCAAATGGCCCTTTGGCTGTCATACGCTTCTAGGTGTCCGAAGTTCAACATACGAAAGTAGCTTTAATAACGCCCACCTGACCCCACGAAAGCTGAGAAA	0	5	4	2	0	3	5	6	1	2	0	3	2	2	3	2	5	12	6	15	21	26	20	0	17	0	4	13	9	23	0	18	22	16	33	34	19	20
OTU_678	Chordata	Actinopteri	Gobiiformes	Gobiidae	Neogobius		96.988	Midori2	GCGGTTATACGAGAGGCCCAAGTTGACAAAAATCGGCGAAAATCGTGGTTAGTGATATCACCTCCACTAAAGCCAAACACCTTCAAGGCTGTAATACTCCCCCGAAGACAGGAAGCCCAATCACGAAAGTAGTTTTAATTTTCATGAAGCCACGAACCTAGGAAA	2	1	1	0	0	0	0	1	0	0	2	0	0	0	0	0	0	0	0	0	0	0	0	0	0	0	0	0	0	2	0	0	251	0	0	0	0	0
OTU_679	Chordata	Actinopteri	Cypriniformes	Leuciscidae	Leuciscus		96.512	Midori2	GCGGTTAAACGAGAGGCCCCAGTTAATAGTACACGGCGTAAGGGGTGGTTAAGGAAAGTATTAACAATAAAGCCGAATGGCCCTTTGGCTGTCATACGCTTCTAGGAGTCCGAAGCCCAATATACGAAAGTAGCTTTAATAAAGCCCACCTGACCCCACGAAAGCTGAGAAA	0	0	0	3	2	5	6	0	0	0	0	2	1	2	3	7	8	1	4	6	1	9	6	0	4	0	3	4	1	4	1	1	6	6	4	22	9	5
OTU_680	Chordata	Actinopteri	Gobiiformes	Gobiidae	Neogobius	Neogobius melanostomus	97.59	Midori2	GCGGTATACGAGGGGCTCAAGTTGACAAAAATCGGCGAAAAGCGTGGTTAGTGATATCACCCCCACTAAAGCCAAACACCTTCAAGGCTGTAATACGCCCCCGAAGACAGGAAGCCCAATCACGAAAGTAGCTTTAATTTTCATGAAGCCACGAAAGCTAGGAAA	13	12	14	14	5	10	7	9	6	4	4	7	13	14	8	13	7	13	5	14	6	15	19	19	10	15	7	4	8	13	22	6	12	6	8	9	6	3
OTU_681	Chordata	Actinopteri	Perciformes	Percidae	Perca		96.988	Midori2	GCGGTTATACGAGAGGCCCGAGTTGATAGGCATCGGCGTAAAGCGTGGTTAAGATTAAAGACAATACTAAAGCCGAACACCTTCAGCTGTTATACGCATCCGAAGGTAAGAAGTTCAACCACGAAAGTGGCTTTATAGCCCCTGAACCCACGGAAGCTACGATA	0	8	4	1	6	4	10	0	0	7	0	1	0	0	4	4	2	2	3	5	4	12	9	8	8	11	7	3	9	7	117	7	4	12	11	9	13	12
OTU_687	Chordata	Actinopteri	Cypriniformes	Leuciscidae	Leuciscus		97.076	Midori2	GCGGTTAAACGAGAGGCCCTAGTTAATAATACACGGCGTAAAGGGTGGTTAAGGAGAGCATAACAATAAAGTCAAATGGCCCCTTGGCCGTCATACGCTTCTAGGAGTCCGAAGCCCAATATACGAAAGTAGCTTTAATAAAGCCCACCTGACCCCACGAAAGCTGAGAAA	0	0	0	0	0	0	1	0	0	0	1	2	2	3	1	41	147	3	13	6	13	8	3	0	8	1	6	4	6	13	0	10	0	9	110	108	46	13
OTU_688	Chordata	Actinopteri	Cypriniformes	Leuciscidae	Rutilus		96.491	Midori2	GCGGTTAAACGAGAGGCCCTAGTTAATAATACACGGCGTAAAGGGTGGTTAAGGGAAGCACAATAATAAAGCCAAATGGCCCTTTGGCTGTCATACGCTCCTAGGTGTCCGAAGCCCAATATACGAAAGTAGCTTTAAACCCCTCCTGACCCCACGAAAGCTGAGAAA	0	56	10091	4290	4098	4002	73	46	4948	108	4722	35	5158	171	102	5970	58	1516	5276	471	533	883	36	0	2075	66	338	439	1970	1015	96	987	1216	1014	94	333	6532	83
OTU_689	Chordata	Actinopteri	Cypriniformes				92.486	Midori2	GCGGTTATACGAGAGGCCCAAGTTGATAGACATCGGCGTAAAGCGTGGTTAAGGAAAGTATTAACAATAAAGCCGAATGGCCCTTTGGCTGTCATACGCTTCTAGGTGTCCGAAGCCCTAATACGAAAGTAACTTTAATAAACCCACCTGACCCCACGAAAGCTGAGAAA	0	0	0	0	0	0	3	0	0	1	0	0	0	0	0	0	1	0	0	13	11	10	8	0	2	0	6	3	7	8	0	8	7	9	28	31	9	4
OTU_690	Chordata	Actinopteri	Perciformes	Percidae	Sander	Sander lucioperca	98.113	manual check	GCGGTTATACAGGCCCAAGTTGATAGACATCGGCGTAAAGCGTGGTTAAGACAAAAACAAAACTAAAGCCGAACACCTTCAGAGCTGTTATACGCACCCGAAGGTAAGAAGTTCAACCACGAAAGTGGCTTTATTACCCCTGAACCCACGAAAGCTGAGAAA	0	0	0	3	0	2	0	0	0	1	0	2	0	0	0	0	0	2	1	2	11	8	2	0	5	0	16	5	0	3	0	9	11	8	24	249	9	8
OTU_691	Chordata	Actinopteri	Gobiiformes	Gobiidae	Neogobius		96.97	Midori2	GCGGTTATACGAGAGGCCCAAGTTGACAAAATCGGCGAAAAGCGTGGTTAGTGATATCACCTCCACTAAAGCCAAACACCTTCAAGGCTGTAATACGCCCCCGAAGACAGGAAGCCCAAATCACGAAAGTAGCTTTAATTCATGAAGCCACGAAAGCTACGATA	0	0	0	0	0	0	1	0	0	0	0	0	0	0	0	0	0	2	0	15	26	14	27	12	6	0	15	25	17	21	0	16	199	16	25	21	14	14
OTU_692	Chordata	Actinopteri	Perciformes	Gasterosteidae	Gasterosteus	Gasterosteus aculeatus	98.125	Midori2	GCGGTTATACGAGAGGCCCAGGTTGATGAATTACGGCGTAAAGAGTGGTTAAGCTAAAATTAAAACTAAAGCCGAACACCCTCAAAGCTGTTATACGCATCCGGAGGTGAGAAGTTCAACCACGAAGGTGGCTTTATCTAACCTGAAGCCACGAAAGCTAGGAAA	0	8	7	5	4	5	4	2	11	4	5	12	3	0	2	4	6	1	5	5	25	8	11	0	15	8	19	20	8	16	6	15	2	11	15	10	6	6
OTU_693	Chordata	Actinopteri	Perciformes	Percidae	Sander		96.97	Midori2	GCGGTTATACGAGAGGCCCAAGTTGATAGACATCGGCGTAAAGCGTGGTTAAGACAAAAACAAAACTAAAGCCGAACACCTTCAGAGCTGTTATACGCACCCGAAGGTAAGAAGCCCAATCACGAAAGTGGCTTTATAGCCCCTGAACCCACGAAAGCTACGATA	0	3	16	20	4	16	8	17	9	15	3	7	13	13	15	6	0	18	9	59	62	85	59	0	38	23	72	43	25	43	0	64	69	70	67	125	114	51
OTU_694	Chordata	Actinopteri	Perciformes	Percidae	Sander	Sander lucioperca	97.546	manual check	GCGGTTATACGAGTGCCCAAGTTGATAGACATCGGCGTAAAGCGTGGTTAAGACAAAAACAAAACTAAAGCCGAACACCTTCAGAGCTGTTATACGCACCCGAAGGTAAGAAGTTCAACCACGAAAATGGCTTTATTACCCCTGAACCCACGAAAGCTAGGAAA	0	0	0	0	1	0	0	0	0	0	0	0	0	0	0	0	0	0	0	0	0	0	0	0	0	0	0	0	0	0	0	0	1	23	2	0	0	0
OTU_695	Chordata	Actinopteri	Cypriniformes	Leuciscidae	Leuciscus	Leuciscus leuciscus	97.024	Midori2	GCGTTAAACGAGAGGCCCTAGTTAATAATACACGGCGTAAAGGGTGGTTAAGGAGAGCATAACAATAAAGCCGAATGGCCCTTTGGCTGTCATACGCTTCTAGGTGTCCGAAGTTCAACATACGAAAGTAGTTTTAATAACGCCCACCTGACCCCACGAAAGCTGAGAAA	31	7	9	28	1	30	37	7	2	3	7	7	11	5	4	15	40	21	29	51	29	59	22	0	25	13	44	77	14	38	0	12	56	26	112	233	91	95
OTU_696	Chordata	Actinopteri	Gobiiformes	Gobiidae	Neogobius		96.97	Midori2	GCGGTTATATAGGCCCAAGTTGACAAAAATCGGCGAAAAGCGTGGTTAGTGATATCACCTCCACTAAAGCCAAACACCTTCAAGGCCGTAATACGCCCCCAAGACAGGAAGCCCAATCACGAAAGTAGCTTTAATTTTCATGAAGCCACGAAAGCTAGGAAA	0	0	0	0	0	0	0	0	0	0	0	0	0	0	0	0	0	0	0	0	0	0	0	0	0	0	0	194	0	0	0	0	0	0	0	0	0	0
OTU_697	Chordata	Actinopteri	Cypriniformes	Cyprinidae	Capoeta		97.647	Midori2	GCGGTAGACGAGAGGCCCTAGTTGATATTACAACGGCGTAAAGGGTGGTTAAGGATAAACAATAATAAAGCCAAATGGCCCCTTGGCCGTCATACGCTTCTAGGTGTCCGAGGCCCTATATACGAAAGTAGCTTTAATTAACCCGCCTGACCCCACGAAAACTGAGAAA	0	24	15	17	7	19	7	9	5	3	23	7	33	8	18	49	17	16	10	56	130	64	61	0	57	8	29	24	17	118	0	26	26	35	50	22	62	16
OTU_698	Chordata	Actinopteri	Cypriniformes	Leuciscidae	Rutilus	Rutilus rutilus	97.661	Midori2	GCGGTTAAACGAGAGGCCCTAGTTAATAATACACGGCGTAAAGGGTGGTTAAGGGGAGCACAATAATAAAGCCAAATGGCCCTTTGGCTGCCATACGCTTCTAGGTGTCCGAAGCCCAATATACGAAAGTAGCTTTAATAAAGCCCACCTTACCCCACAAAAGCTGAGAAA	168	0	7	2	19	33	16	81	7	7	5	43	29	100	59	28	12	75	10	16	1	16	4	0	19	5	17	12	9	29	5	48	430	31	7	21	10	29
OTU_699	Chordata	Actinopteri	Perciformes	Percidae	Sander		96.97	Midori2	GCGGTTATACGAGAGGCCCAAGTTGATAGACATCGGCGTAAAGCGTGGTTAAGATTACAAAACTAAAGCCGAACACCTTCAGAGCTGTTATACGCACCCGAAGGTAAGAAGTTCAACCACGAAAGTGGCTTTATTACCCCTGAACCCACGAAAGCTACGATA	0	0	0	2	0	0	0	0	0	1	0	0	0	0	0	0	0	1	0	2	4	10	10	0	1	1	6	10	9	9	0	6	11	25	11	12	13	7
OTU_700	Chordata	Actinopteri	Cypriniformes	Leuciscidae	Leuciscus	Leuciscus leuciscus	98.246	Midori2	GCGGTTAAACGAGAGGCCCTAGCTAATAATACACGGCGTAAAGGGTGGTTAAGGAAATCACAATAATAAAGCCAAATGGCCCTTTGGCTGTCATACGCTTCTAGGTGCCCGAAGCCCAATATACGAAAGTAGCTTTAATAAAGCCCACCTGACCCCACGAAAGCTGAGAAA	7	2	45	0	26	38	86	4	22	32	38	41	12	33	41	80	11	32	28	8	22	9	61	0	55	69	11	46	21	29	14	37	46	62	87	54	22	18
OTU_701	Chordata	Actinopteri	Cypriniformes	Cyprinidae	Capoeta		96.951	Midori2	GCGGTTAGACGAGAGGCCCTAGTTGATATTACAACGGCGTAAAGGGTGGTTAAGGATAAACAAAAATAAAGCCAAATGGCCCCTTGGCCGTCATACGCTTCTAGGTGTCCGAGGCCCTATATACGAAAGTAGCTTTAATTAACCCGCCTGACCCCACGAAAGCTACGATA	0	32	27	49	20	39	22	19	14	13	43	5	59	22	40	51	43	24	43	69	271	107	154	0	73	27	46	39	28	181	0	66	45	45	69	53	130	15
OTU_702	Chordata	Actinopteri	Gobiiformes	Gobiidae	Neogobius		95.181	Midori2	GCGGTTAAACGAGGGGCCCTAGTTAATAATACGCGGCGAAAAGCGTGGTTAGTGATATCACCTCCACTAAAGCCAAACACCTTCAAGGCTGTAATACGCCCCCGAAGACAGGAAGCCCAATCACGAAAGTAGCTTTAATTTTCATGAAGCCACGAAAGCTAGGAAA	64	57	80	78	46	121	104	69	69	36	42	37	64	91	83	149	114	72	124	230	132	185	105	7	99	33	153	138	71	131	9	166	137	164	370	485	295	223
OTU_703	Chordata	Actinopteri	Gobiiformes	Gobiidae	Neogobius	Neogobius melanostomus	98.758	Midori2	GCGGTTAAACGAGAGGCCCAAGTTGACAAAAATCGGCGAAAAGCGTGGTTAGTGATATCACCTCCACTAAAGCCAAACACCTTCAAGGCTGTAATACGCCCCCGAAGACAGGAAGCCCAATCACGAAAGTAGCTTTAATTTTCATGAAGCCACGACAGCTATGGTA	12	14	22	12	3	19	16	6	11	9	9	14	13	14	10	13	8	12	14	39	34	32	33	0	42	8	25	36	6	35	5	32	39	42	54	62	40	26
OTU_704	Chordata	Actinopteri	Cypriniformes	Leuciscidae	Abramis	Abramis brama	98.193	Midori2	GCGGTTAAACGAGAGGCCCCAGTTAATAATACACGGCGTAAAGGGTGGTTAAGGAAAGTATTAACAATAAAGCCGAATGGCCCTTTGGCTGTCATACGCTTCTAGGTGTCCGAAGTTCAACATACGAAAGCCCTTTAATAACGCCCACCTGACCCCACGAAAGCTACGATA	7	10	13	18	7	2	7	5	9	9	2	5	6	1	3	11	5	9	8	27	50	55	33	0	32	12	44	38	37	23	6	24	35	756	30	36	22	31
OTU_705	Chordata	Actinopteri	Cypriniformes				94.737	Midori2	GCGGTTAACGAGAGGCCCTAGTTGATATTACAACGGCGTAAAGGGTGGTTAAGGATAAACAAAAATAAAGTCAAATGGCCCCCCGTCATACGCTTCTAGGAGTCCGAAGCCCAATATACGAAAGTAGCTTTAATAAAGCCCACCTGACCCCACGAAAGCTGAGAAA	0	9	62	33	30	84	81	45	27	43	62	32	73	66	80	234	105	95	140	139	88	102	104	0	79	26	75	48	68	185	13	188	101	90	589	370	211	172
OTU_706	Chordata	Actinopteri	Gobiiformes	Gobiidae	Neogobius		96.988	Midori2	GCGGTTATACGAGAGGCCCAAGTTGACAAAAATAGGCGAAAAGCGTGGTTAGTGAGATCACCTCCACTAAAGCCAAACACCTTCAAGGCTGTAATACGCCCCCGAAGACAGGAAGCCCAATCACGAAAGTAGCTTTAATTTTCATCAAGCCACGAAAGCCAGTAAA	0	0	0	0	0	0	0	0	0	0	0	0	0	0	0	0	0	0	0	0	0	0	0	57	0	0	0	0	29	0	0	0	0	0	0	99	0	0
OTU_707	Chordata	Actinopteri	Gobiiformes	Gobiidae	Neogobius		96.988	Midori2	GCGGTTATACGAGAGGCCCAAGTTGACAAAAATCGGCGAAAAGCGTGGTTAGTGATATCACCCCCACTAAAGCCAAACACCTTCAAGGCTGTAATACGCCCCCGAAGACAGGAAGCCCAATCACGAAACTAGCTTTAATTTTCATTAGCCATGAAAGCTAGGAAA	3	0	0	1	3	1	0	0	0	0	2	0	0	0	0	0	0	2	0	0	0	0	0	0	0	0	0	282	0	0	0	0	0	0	0	0	0	0
OTU_708	Chordata	Actinopteri	Cypriniformes	Leuciscidae	Vimba/Blicca	Vimba vimba / Blicca bjeorkna	99.415	manual check	GCGGTAAACGAGAGGCCCCAGTTAATAATACACGGCGTAAAGGGTGGTTAAGGAAAGTATAACGATAAAGCCGAATGGCCCTTTGGCTGTCATACGCTTCTAGGTGTCCGAAGTCCAATATACGAAAGTAGCTTTAATAGAGCCCACCTGACCCCACGAAAGCTGAGAAA	0	0	0	0	0	0	966	0	0	0	0	0	0	0	0	0	1	0	0	2300	1288	0	0	0	2914	0	0	402	0	3255	0	0	0	0	0	0	0	1
OTU_713	Chordata	Mammalia	Artiodactyla	Bovidae			96.951	Midori2	GCGGTCATACGATTAACCCAAGCGAACAGGAGTACGGCGTAAAACGTGTTAAAGCACCATACCAAATAGGGTTAAATTCTAACTAAGCTGTAAAAAGCCATGATTAAAAAATAAATGACGAAAGTGACCCTACAATAGCCGACGCACTATAGCTAAGACC	70	7	19	4	19	6	17	15	14	14	19	21	17	18	8	11	11	15	14	0	0	0	0	37	35	13	0	0	0	0	0	0	0	0	0	0	0	0
OTU_719	Chordata	Actinopteri	Gobiiformes	Gobiidae	Neogobius		96.988	Midori2	GCTGTTATACGAGAGGCCCAAGTTTACAAAAATCGGCGAAAAGCGTGGTTAGTGATATCACCTCCACTAAAGCCAAACACCTTCAAGGCTGTAATACGCCCTCGAAGACAGGAAGCCCAATCACGAAAGTAGCTTTAATTTTCATGAAGCCACGAAAACTAGGGAA	2	2	0	0	0	0	0	0	0	0	0	0	2	0	0	0	0	0	1	0	0	0	0	2	0	1	0	0	0	0	0	0	0	0	0	2	0	91
OTU_720	Chordata	Actinopteri	Gobiiformes	Gobiidae	Neogobius	Neogobius melanostomus	98.16	Midori2	GCGTTATACGATAGGCCCAAGTTGACAAAAATCGGCGAAAAGCGCGGTTAGTGATATCACCTCCACTAAAGCCAAACACCTTCAAGGCTGTAATACGCCCCCGAAGACAGCAAGCCCAATCACGAAAGTAGCTTTAATTTTCATGAAGCCACGAAAGCTAGGAAA	0	0	1	0	0	1	0	0	0	0	0	0	0	1	0	0	0	1	0	2	0	265	0	0	7	0	1	0	2	2	0	0	0	2	3	1	0	0
OTU_721	Chordata	Actinopteri	Gobiiformes	Gobiidae	Neogobius	Neogobius melanostomus	97.576	Midori2	GCGGTTACGAGAGGCCCAAGTTGACAAAAATCGGCGAAAAGCGTGGTTTGATATCACCTCCACTAAAGCCAAACACCTTCAAGGCTGTAATACGCCCCCGAAGACAGGAAGCCCAATCACGAAAGTAGCTTTAATTTTCATGAAGCCACGAAAGCTAGAAAA	0	0	0	0	0	0	0	0	0	0	0	0	0	0	0	0	0	0	0	0	0	0	0	2	0	0	0	9	0	0	0	0	0	0	161	0	4	0
OTU_722	Chordata	Actinopteri	Perciformes	Percidae	Perca	Perca fluviatilis	99.351	Midori2	CGTTCGACGCCCAAGTTGATAGACATCGGCGTAAAGCGTGGTTAAGATTAAAGACAATACTAAAGCCGAACACCTTCAGAGCTGTTATACGCATCCGAAGGTAAGAAGTTCAACCACGAAAGTGGCTTTATAGCCCCTGAACCCACGAAAGCTACGATA	0	0	0	0	0	0	0	0	0	0	0	0	0	0	0	0	0	0	1	2	4	0	5	0	2	2	0	0	2	6	1	2	0	0	6	0	0	4
OTU_723	Chordata	Actinopteri	Perciformes	Percidae	Perca		96.988	Midori2	GCGGTTATACGAGAGGCCCAAGTTGATAGACATCGGCGTAAAGCGTGGTATATTAAGGACAATACTAAAGCCGAACACCTTCAGAGCCGTTATACGCATCCGAAGGTAAGAAGTTCAACCACGAAAGTGGCTTTATAGCCCCTGAACCCACGAAAGCTACGATA	4	0	5	5	0	1	3	5	0	9	0	0	2	2	2	2	0	2	0	2	2	1	3	0	2	14	14	1	0	45	0	3	35	4	0	4	2	3
OTU_726	Chordata	Actinopteri	Perciformes	Gasterosteidae	Gasterosteus		95.783	Midori2	GCGGTTATACGAGAGGCCCAAGTTGATGAATTACGGCGTAAAGCGTGGTTAAGATTAAAGACAATACTAAAGCCGAACACCCCCAAAGCTGTTATACGCATCCGGAGGTGAGAAGTTCAACCACGAAGGTGGCTTTATCTAACCTGAACCCACGAAAGCTACGGCA	0	0	0	0	0	0	0	0	1	1	0	0	0	0	0	2	0	0	0	0	6	7	6	0	5	3	9	18	0	3	0	2	2	3	10	18	3	1
OTU_727	Chordata	Actinopteri	Perciformes	Percidae	Perca	Perca fluviatilis	97.561	Midori2	GCGGTTATACGAGAGGCCCAAGTTGATAGACATCGGCGTAAAGCGTGGTTAAGATTAAAGACAATACTAAAGCCGAACACCTTCAAAGCTGTTATACGCACCCGAAGGTAAGAAGTTCAACCACGAAAGTGGCTTTATAACCGCTGAACCCACGAAAGCTACGACA	0	0	0	0	0	0	1	0	0	2	0	0	0	0	0	20	0	19	0	0	0	0	0	0	0	3	0	0	0	0	0	0	0	0	0	0	12	0
OTU_730	Chordata	Actinopteri	Perciformes	Percidae			92.169	Midori2	GCGGTTATACGAGAGGCCCAAGTTGATAGACATCGGCGTAAAGCGTGGTTAAGATTAAAGACAATACTAAAGCCAAACACCTTCAAGGCTGTAATACGCCCCCGAAGACAGGAAGCCCAATCACGAAAGTAGCTTTATAGCCCCTGAACCCACGAAAGCTACGATA	0	0	0	0	0	0	0	0	3	0	0	0	0	0	0	0	0	0	0	5	4	5	4	0	0	0	7	3	3	4	0	1	1	0	3	11	8	5
OTU_731	Chordata	Actinopteri	Cypriniformes	Leuciscidae	Leuciscus		96.512	Midori2	GCGGTTAAACGAGAGGCCCTAGTTGATTTTATCACGGCGTAAAGGGTGGTTAAGGAAAGCATAACAATAAAGCCGAATGGCCCTTTGGCTGTCATACGCTTCTAGGTGTCCGAAGCCCAATATACGAAAGTAGCTTTAATAAAGCCCACCTGACCCCACGAAAGCTAGGAAA	0	0	0	2	0	20	14	0	0	22	23	4	4	11	27	0	0	53	29	12	11	4	0	0	0	0	8	2	4	0	0	4	4	12	2	22	2	0
OTU_732	Chordata	Actinopteri	Cypriniformes				96.471	Midori2	GCGGTTATACGAGAGGCCCAAGTTGATATTACAACGGCGTGAAGGGTGGTTAAGGATAAACAAAAATAAAGTCAAATGGCCCCTTGGCCGTCATACGCTTCTAGGAGTCCGAAGCCCTAATACGAAAGTAGCTTTAATAACGCCCACCTGACCCCACGAAAGCTGAGAAA	0	0	0	6	1	7	7	5	5	5	5	6	6	4	3	11	8	5	12	47	32	37	20	0	22	3	28	17	21	45	0	42	19	23	67	68	34	24
OTU_733	Chordata	Actinopteri	Perciformes	Percidae			92.771	Midori2	GCGGTTATACGAGAGGCCCAAGTTGACAAAAATCGGCGTAAAGCGTGGTTAATAACTTATTTACTAAAGCCGAACACCTTCAGAGCTGTTATACGCATCCGAAGGTAAGAAGTTCAACCACGAAAGTGGCTTTATAGCCCCTGAACCCACGAAAGCTACGATA	0	4	4	0	2	2	2	1	1	6	6	1	0	0	2	3	1	3	6	55	63	97	41	0	21	5	72	71	37	66	0	33	18	64	109	32	66	45
OTU_734	Chordata	Actinopteri	Cypriniformes	Leuciscidae			92.442	Midori2	GCGGATATACGAGAGGCCCAAGTTGACAAAAATCGGCGAAAAGGGTGGTTAAGGAAAGCATTATAATAAAGCCAAATGGCCCTTTGGCTGTCATACGCTTCTAGGTGTCCGAAGTTCAACATACGAAAGTAGCTTTAATAACGCCCACCTGACCCCACGAAAGCTGAGAAA	14	52	37	47	24	63	42	36	23	6	17	31	24	35	24	28	45	17	28	56	44	58	48	0	37	25	56	47	10	37	10	41	57	34	42	49	35	33
OTU_735	Chordata	Mammalia	Rodentia	Cricetidae	Microtus	Microtus arvalis	97.516	Midori2	GCGGTCATACGATTAACCCAAACTAATTATTCTCGGCGTAAAACGTGTTACTAGAATATTCAAAATAGAATTAAAATCCATCCAATATGTGAAAATTCATCGCTGGACCTAAAACCAATGACGAAAGTAATTCTAATAAGCCTGATACACGAAAGCTGAGAAA	0	0	0	0	0	0	0	0	0	0	0	0	0	6	0	0	0	0	1	0	1	0	0	0	0	0	0	0	0	0	0	0	11	22	0	0	0	990
OTU_736	Chordata	Actinopteri	Cypriniformes	Leuciscidae	Leuciscus	Leuciscus leuciscus	97.076	Midori2	GCGGTTATACGAGAGGCCCAAGTTGATAATACACGGCGTAAAGGGTGGTTAAGGAGAGCATAACAATAAAGCCGAATGGCCCTTTGGCTGTCATACGCTTCCAGGTGTCCGAAGCCCAATATGCGAAAGTAGCTTTAATAAAGCCCACCTGACCCCACGAAAGCTGAGAAA	0	0	0	0	0	5	16	0	0	3	3	0	0	0	1	9	11	1	3	8	0	5	0	0	2	0	3	2	5	9	0	12	0	7	31	74	22	15
OTU_737	Chordata	Actinopteri	Cypriniformes	Leuciscidae			93.333	Midori2	GCGGTTAAACGAGAGGCCCTAGTTAATAATACACGGCGTAAAGGGTGGTTAAGGAGAGCATAACAATAAAGCCGAATGGCCCTTTGGCTGTCATACGCTTCTAGGTGTCCGAAGTTCAACATACGAAAGTAGCTTTATTACCCCTGAACCCACGAAAGCTACGATA	0	4	6	6	3	13	11	12	0	2	4	3	8	4	10	3	7	7	6	55	67	126	56	0	21	6	83	53	10	68	0	76	67	58	76	236	143	61
OTU_738	Chordata	Actinopteri	Cypriniformes	Leuciscidae	Rutilus	Rutilus rutilus	97.661	Midori2	GCGGCTAAACGAGAGGCCCTAGTTAATAATACACGGCGTAAAGGGTGGCTAAGGGAAGCACAATAATAAAGCCAAATGGCCTTTTGGCTGTCATACGCTTCTAGGTGTCCGAAGCCCAATATACGAAAGTAGCTTTAATAAAGCCCACCTGGCCCCACGAAAGCTGAGAAA	0	0	0	0	0	0	0	4	2	2	0	0	2	4	6	5	3	4	1	11	0	12	0	0	1	0	2	1	5	4	3	1	8	7	6	2	3	1
OTU_746	Chordata	Actinopteri	Cypriniformes	Leuciscidae	Rutilus	Rutilus rutilus	97.661	Midori2	GCGGTTAAACGAGAGGCCCTAGTTAATAATACACGGCGTAAAGGGTGGTTAAGGGAAGCACAATAATAAAGCCAAATGGCCCTTTGGCTGTCATACGCTTCTAGGTGTCCGAAGCCTAATATATGAAAGTAGTTTTAATAAAGTCCACCTGACCCCACGAAAGCTGAGAAA	0	0	1	0	0	0	2	2	0	0	2	3	0	0	0	3	0	0	0	0	2	1	0	0	2	3	3	8	2	3	0	0	0	0	3	4	6	2
OTU_747	Chordata	Actinopteri	Perciformes	Percidae	Perca		96.988	Midori2	GCGGTTATACGAGAGGCCCAATTTGATAGACATCGGCGTAAAGCCTGGTTAAGATTAAAGACAATACTAAAGCCGAACACCTTCAGAGCTGTTATACCCATCCGAAGGTAAGAAGTTCAACCACGAAAGTGGCTTTATTACCCCTGAACCCACGAAAGCTACGATA	0	0	0	0	0	0	0	0	0	0	0	0	0	0	0	0	0	0	0	0	0	0	0	0	0	0	0	0	0	0	0	0	0	0	0	6	28	0
OTU_750	Chordata	Actinopteri	Gobiiformes	Gobiidae	Neogobius	Neogobius melanostomus	97.531	Midori2	GCTTATACGAGAGGCCCAATTGACAAAAATCGGCGAAAAGCGTGGTTAGTGATATCACCTCCACTAAAGCCAAACACCTTCAAGCCTGTAATACGCCCCCGAAGACAGGAAGCCCAATCACGAAAGTAGCTTTAATTTTCATGAAGCCACGAAAGCTGAGAAA	0	0	0	0	0	0	0	0	0	0	0	0	0	0	0	0	0	2	0	1	11	5	5	0	9	0	0	4	4	423	0	4	0	7	0	7	3	4
OTU_751	Chordata	Actinopteri	Gobiiformes	Gobiidae	Neogobius	Neogobius melanostomus	97.561	Midori2	GCGGTTATACGAGAGGCCCAAGTTGACAAAAATCGGCGAAAAGCGTGGTTTGATATCACCTCCACTAAAGCCAAACACCTTCAAGGCTGTAATACGCCCCCGAAGACAGGAAGCCCAATCACGAAAGTAGCTTCAATTTTCATGAAGCCACGAAAGCTACGATA	2	1	4	4	2	0	2	1	0	1	0	3	3	0	5	0	0	3	5	18	6	9	6	0	4	2	9	11	4	7	0	5	6	5	5	14	16	3
OTU_752	Chordata	Actinopteri	Perciformes	Percidae	Perca		96.951	Midori2	GCGGTTATACGAGAGGCCCAAGTTGATAGACATCTGCGTAAAGCGTGGTTAAGATTTAAGACAATACTAAAGCCGAACACCTTCAGAGCTGTTATACGCACCCGAAGGTAAGAAGTTCAACCACGAAAGTGGCTTTATAGCCCCTGAAGCCACGAAAGCTAGGAAA	0	0	0	0	0	0	0	2	0	0	0	0	0	0	0	0	0	0	0	1	0	0	0	0	0	0	0	0	0	1	0	1	0	0	0	0	0	0
OTU_753	Chordata	Actinopteri	Cypriniformes	Leuciscidae	Rutilus	Rutilus rutilus	97.619	Midori2	GCGTTATACGAGAGGCCCAAGTTGATAATACACGGCGTAAAGGGTGGTTAAGGGAAGCACAATAATAAAGCCAAATGGCCCTTTGGCTGTCATACGCTTCTGGGTGTCCGAAGCCCAATATACGAAAGTAGCTTTAATAAAGCCCACCTGACCCCACGAAAGCTGAGAAA	3	6	19	1	2	8	6	6	7	7	4	2	5	9	8	10	7	11	8	26	10	15	5	0	7	10	19	20	26	22	7	32	15	16	43	36	30	45
OTU_754	Chordata	Actinopteri	Perciformes	Percidae	Sander		96.97	Midori2	GCGGTTGTACGAGAGGCCCAAGTTGATAGACATCGGCGTAAAGCGTGGTTAATACAAAAACAAAACTAAAGCCGAACACCTTCAGAGCTGTTATACGCACCCGAAGGTAAGAAGTTCAACCACGAAAGTGGCTTTATAGCCCCTGAACCCACGAAAGCTGCGATA	0	0	2	0	0	0	0	0	0	0	0	0	0	0	0	0	0	0	0	0	1	5	1	0	0	1	0	0	3	1	0	4	1	4	7	43	4	3
OTU_755	Chordata	Actinopteri	Cypriniformes	Leuciscidae	Squalius	Squalius cephalus	97.076	Midori2	GCGGTTAAACGAGAGGCCCTAGTTAATAATACACGGCGTAAAGGGTGGTTAAGGAAAACATAACAATAAAGCCGAATGGCCCTTTGGCTGTCATACGCTTCTAGGTGTCCGAAGCTCAATATACGAAAGTGGCTTTAACAAAGTCCACCTGACGCCACGAAAGCTGAGAAA	0	19	3	10	13	6	6	13	11	10	3	15	11	7	13	37	2	16	11	3	8	0	10	0	7	6	1	0	3	9	0	1	1	7	6	22	11	11
OTU_757	Chordata	Actinopteri	Cypriniformes	Leuciscidae	Leuciscus	Leuciscus leuciscus	97.661	Midori2	GCGGTCATACGAGAGGCCCTAGTTAATAATACACGGCGTAAAGGGTGGTTAAGAAAAGCACAATAATAAAGCCAAATGGCCCTTTGGCTGTCATACGCTTCTAGGTGTCCGAAGCCCAATATACGAAAGTAGCTTTAATAAAGCCCACCTGACCCCATGAAAGCTGAGAAA	13	0	8	3	3	10	3	3	4	4	0	8	0	17	5	5	9	9	4	2	51	3	7	0	11	10	4	3	8	2	1	25	41	16	19	8	10	18
OTU_758	Chordata	Actinopteri	Perciformes	Percidae	Perca		96.386	Midori2	GCGGTTATACGAGAGGCCCAAGTTGATAGACATCGGCGTAAAGCGTGGTTAAGATTAAAGACAATACTAAAGCCGAACACCTTCAGAGCTGTTATACGCGCCCGGAGGTAAGAAGTTCAACCACGAAAGTGGCTTTATTACCCCTGAACCCACGAAAGCTACGGTA	0	0	4	5	3	6	2	3	2	4	0	0	5	3	8	1	4	8	3	25	20	30	8	0	16	8	17	22	7	12	0	18	16	19	28	49	38	13
OTU_760	Chordata	Actinopteri	Perciformes	Percidae	Perca	Perca fluviatilis	97.484	Midori2	GCGGTTATACGAGAGGCCCAAGTTGATAGACATCGGCGTAAAGCGTGGTTAAGATTAAAGACAATACTAAAGCCGAACACCTTCAGAGCTGTTATACGCATCCGAAGGTAAGAAGTTCAACCACGAAAGTGGCTTTATCTAACCTGAACCCACGAAAGCCAGCA	0	137	33	79	65	35	67	90	103	38	53	34	32	31	22	108	77	49	90	381	1256	568	665	19	340	154	598	1092	228	852	39	478	253	322	959	1048	380	246
OTU_761	Chordata	Actinopteri	Perciformes	Percidae	Sander	Sander lucioperca	98.16	manual check	TTGGTTATACGAGAGGCCCAAGTTGATAGACATCGGCGTAAAGCGTGGTTGAGACAAAAACAAAACTAAAGCCGAACACCTTCAGAGCTGTTATACGCACCCGAAGGTAAGAAGTTCAACCACGAAAGTGGCTTTATAGCCCCTGAACCCACGAAAGCTACGATA	0	0	7	6	3	5	5	3	2	12	5	0	7	4	2	5	2	10	6	21	27	41	19	0	15	14	44	38	23	31	0	45	64	37	57	121	143	26
OTU_762	Chordata	Actinopteri	Cypriniformes	Leuciscidae	Leuciscus		96.491	Midori2	GCGGTTAAACGAGAGGCCCCAGTTAATAATACACGGCGTAAAGGGTGGTTAAGGAAAGCATAACAATAAAGCCGAATGGCCCTTTGGCTGTCATACGCTTCTAGGTGTCCGAAGCCCAATATACGAAAGTAGCTTTAATAAACCCTGACCCCACGAAAGCTGAGAAA	16	11	18	31	15	41	53	28	25	24	12	14	15	38	26	63	22	22	51	146	109	82	78	0	42	16	42	78	32	146	0	90	61	82	222	163	220	96
OTU_763	Chordata	Actinopteri	Gobiiformes	Gobiidae	Neogobius	Neogobius melanostomus	97.561	Midori2	GCGGTTATACGAGAGGCCCAAGTTGACAAAAATCGGCGAAAAGCGTGGTTAGTGATATCACCTCCACTAAAGCCAAACACCTTCAAGGCTGTAATACGCCCCCGAAGACAGGAAGCCCAATCACGAAAGTAGCTTAATTTTCATGAAGCCAAAAGCTACGATA	0	4	2	2	0	0	1	3	0	2	0	0	0	0	0	0	4	1	0	24	19	13	19	0	11	26	54	15	14	31	0	15	14	18	31	32	25	213
OTU_764	Chordata	Actinopteri	Cypriniformes	Leuciscidae	Leuciscus	Leuciscus leuciscus	97.076	Midori2	GCGGTTAAACGAGACACCCCAGTTAATAATACGGCGTAAAGGGTGGTTAAGGAGAGCATAACAATAAAGCCGAATGGCCCTTTGGCTGTCATACGCTTCTAGGTGTCCGAAGCCCAATATACGAAAGTAGCTTTAATAAAGCCCACCTGACCCCACGAAAGCTGAGAAA	5	1	0	3	0	8	4	0	2	3	11	1	0	3	0	3	6	3	4	10	0	6	4	0	3	0	5	10	4	18	0	3	4	2	45	67	28	13
OTU_765	Chordata	Actinopteri	Cypriniformes	Leuciscidae	Abramis		96.512	Midori2	GCGGTTAAACGAGAGGCCCCAGTTAATAATACACGGCGTAAAGGGTGGTTAAGGAAAGTATTAACAATAAAGCCGAATGACCCTTTGGCTGTCATACGCCTCTAGGTGTCCGAAGCTCAATATATGAAAGTAGCTTTAATAAAGCCCACCTGACCCCACGAAAGCTGAGAAA	0	0	0	0	0	0	0	0	0	0	0	0	0	0	0	0	0	0	2	0	2	66	0	0	0	0	0	0	2	0	0	0	0	0	4	0	1	2
OTU_767	Chordata	Actinopteri	Cypriniformes	Leuciscidae	Abramis		96.512	Midori2	GCGGTTAAACGAGAGGCCCCAGTTAATAATACAGCGTAAAGGGTGGTTAAGAAATTATTAACAATAAAGCCGAATGGCCCTTTGGCTGTCATACGCTTCTAGGTGTCCGAAGTTCAACATACGAAAGTAGCTTTAATAACGCCCACCTGACCCCACGAAAGCTAGGAAA	0	0	0	0	0	0	0	0	0	0	0	0	0	0	0	0	0	0	0	0	0	0	0	0	0	0	0	0	0	0	0	2	0	0	0	0	0	0
OTU_768	Chordata	Actinopteri	Gobiiformes	Gobiidae	Neogobius		96.988	Midori2	GCGGTTAAACGAGAGGCCCTAGTTGACAAAAATCGGCGAAAAGCGTGGTTAGTGATATCACCTCCACTAAAGCCAAACCTTCAAGGCTGTAATACGCCCCCGAAGACAGGAAGCCCAATCACGAAAGTAGCTTTAATTTTCATGAAGCCACAAAAGCTAGGAAA	74	126	158	145	93	238	179	157	126	124	107	78	127	193	155	341	225	183	204	364	170	210	141	0	203	112	145	185	139	283	31	293	174	245	619	808	389	308
OTU_769	Chordata	Actinopteri	Gobiiformes	Gobiidae	Neogobius	Neogobius melanostomus	97.561	Midori2	GCGGTTAAACGAGAGGCCCCAGTTGACAAGAATCGGCGAAAAGCGTGGTTAGTGATATCACCTCCACTAAAGCCAAACACCTTCAAGGCTGTAATACGCCCCCGAAGACAGGAAGCCCAATCACGAAAGTAGCTTTAATTTTCATGAAGCCACGAAAGCTACGATA	358	538	571	620	293	902	622	478	503	160	301	431	388	410	250	479	498	352	633	874	559	731	503	119	556	185	383	417	149	522	119	478	455	429	544	914	429	578
OTU_780	Chordata	Actinopteri	Gobiiformes	Gobiidae	Neogobius		96.386	Midori2	GCGGTTATACGAGAGGCCCAAGTGACAAAAATCGGCGAAAAGCGTGGTTAGTGATATCACCTCCACTAAAGCCAAACACCTTTAAGGCTGTTATACGCCCCCAAAGGTAGGAAGCCCAATCACGAAAGTAGCTTTAATTTTCATGAAGCCACGAAAGCTAGGAAA	0	0	0	0	0	0	0	0	0	0	0	0	0	0	0	0	0	0	0	0	7	10	4	0	0	0	0	3	0	2	0	2	0	2	5	0	8	5
OTU_781	Chordata	Actinopteri	Perciformes	Percidae	Sander	Sander lucioperca	100	manual check	GCGGTTATACGAGAGGCCCAAGTTGATAGACATCGGCGTAAAGCGTGGTTAAGACAAAAACAAAACTAAAGCCGAACACCTTCAGAGCTGTTATACGCACCCGAAGGTAAGAAGTTCAACCACGAAAGTGGCTTTATTACCCCTGAACCCACGAAAGCCAGGGCC	0	11	41	88	59	38	24	52	35	48	48	22	28	40	35	11	32	50	49	29	47	79	88	0	75	34	76	25	27	64	0	96	74	147	54	112	88	57
OTU_793	Chordata	Actinopteri	Gobiiformes	Gobiidae	Neogobius	Neogobius melanostomus	97.561	Midori2	GCGGTTATACGGGAGGCCCAAGTTGACAAAAATCGGCCAAAAGCGTGGTTAGTGATATCACCTCCACTAAAGCCAAACACCTTCAAGGCTGTAATACCCCCCGAAGACAGGAAGCCCAATCACGAAAGTAGCTTTAATTTTCATGAAGCCACGAAAGCTACGATA	0	0	0	0	0	0	0	4	3	1	0	0	0	0	1	2	2	0	0	2	0	6	0	0	7	1	4	6	2	6	0	5	9	8	14	190	10	5
OTU_794	Chordata	Actinopteri	Perciformes	Gasterosteidae			96.951	Midori2	TCGGTTATACGAGAGGCCCAAGTTGATGAACATCGGCGTAAAGAGTGGTTAAGCTAAAATTAAAACTAAAGCCGAACGTCCCCAAAGCTGTTATACGCATCCGGAGGTGAGAAGTTCAACCACGAAGGTGGCTTTATCTAACCTGAACCCACGAAAGCTACGGCA	0	0	12	0	0	0	0	0	0	0	0	0	0	0	0	0	0	0	0	0	0	22	0	0	0	0	5	4	4	13	0	2	10	23	2	3	5	0
OTU_796	Chordata	Actinopteri	Perciformes	Percidae	Perca	Perca fluviatilis	98.16	Midori2	CCGGTTATACGAGAGGCTCAAGTTGATAGACATCGGCGTAAAGCGTGGTTAAGATTAAAGACAATACTAAAGCCGAACACCTTCAGAGCTGTTATACGCATCCGAAGGTAAGAAGTTCAACCACGAAGGTGGCTTTATAGCCCCTGAACCCACGAAAGCTAGGAAA	0	5	4	6	1	5	6	9	6	8	6	3	3	5	3	3	8	8	3	29	19	21	10	0	18	3	17	15	14	17	0	10	14	8	16	17	16	17
OTU_797	Chordata	Actinopteri	Gobiiformes	Gobiidae	Ponticola		96.319	Midori2	CCGGTTATACGAGAGGCCCGAGTTGACAAACATTCGGCGTAAAGCGTGGTTAGTAACTTATTTACTAAAGCCAAACACCTTTAAGGCTGTTATACGCCCCCAAAGGTAGGAAGACCCCTCACGAAAGTAGCCTTAATTTTCATGAAGCCACGAAAGCTAGGAAA	0	70	33	16	9	37	27	59	28	15	58	2	12	39	27	39	31	44	73	274	303	410	200	0	132	36	344	239	113	316	0	165	126	376	409	156	224	164
OTU_798	Chordata	Actinopteri	Cypriniformes	Leuciscidae	Abramis	Abramis brama	98.795	Midori2	GCGGTTAAACGAGAGGCCCCAGTTAATAATACACGGCGTAAAGGGTGGTTAAGGAAAGTATTAACAATAAAGCCGAATGGCTCTTTGGCTGTCATACGCTTCTAGGTGTCCGAAGTTCAACATACGAAAGTAGCTTTAATAACGCCCACCTGACCCCACGACAGCTATGGTA	7	7	0	2	2	10	2	4	5	6	2	2	2	0	4	2	0	6	4	9	8	6	4	0	1	0	3	2	2	4	0	5	5	5	0	0	1	5
OTU_800	Chordata	Actinopteri	Cypriniformes	Cyprinidae	Barbus		95.714	Midori2	GCGGTTAAACGAGAGGCCCCAGTTAATAATACACGGCGTAAAGGGTGGTTAGGGATAAATAATAATAAAGCCAAATGGCCCCTTGGCCGTCATACGCTTCTAGGTGTCCGAGGCCCTATATACGAAAGTAGCTTTAATTTTCATGAAGCCACGAAAGCTAGGAAA	0	0	0	0	0	0	0	0	0	0	0	0	0	0	0	0	0	0	0	2	7	2	0	0	0	0	2	0	0	0	0	0	0	2	0	0	5	0
OTU_801	Chordata	Actinopteri	Cypriniformes	Leuciscidae			94.545	Midori2	GCGGTTAAACGAGAGGCCCTAGTTAATAATACACGGCGTAAAGGGTGGTTAAGGAAAGCATAACAATAAAGCCGAATGGCCCTTTGGCTGTCATACGCTTCTAGGTGTCCGAAGCCCAATATACGAAAGTAGCTTTATCTAACCTGAACCCACGAAAGCTACGGCA	0	0	0	0	0	0	0	0	0	0	0	0	0	0	0	0	0	0	2	0	2	0	1	0	4	0	2	6	0	1	0	3	0	0	0	3	0	0
OTU_803	Chordata	Actinopteri	Perciformes	Percidae			93.865	Midori2	GCGGTTATACGAGAGGCCCAAGTTGATGAATTACGGCGTAAAGAGTGGTTAAGATTAAAGACAATACTAAAGCCGAACACCTTCAGAGCTGTTATACGCATCCGAAGGTAAGAAGTTCAACCACGAAAGTGGCTTTATCTAACCTGAACCCACGAAAGCTACGGCA	0	0	0	0	0	0	0	0	0	0	0	0	0	0	0	0	0	0	0	0	5	0	5	0	1	2	2	11	0	5	0	4	0	0	0	8	0	1
OTU_805	Chordata	Actinopteri	Perciformes	Percidae	Sander		96.364	Midori2	GCGGTTATACGAAAGACCCTAGTTAATAGCCACGGCGTAAAGCGTGGTTAAGACAAAAACAAAACTAAAGCCGAACACCTTCAGAGCTGTTATACGCACCCGAAGGTAAGAAGTTCAACCACGAAAGTGGCTTTATTACCCCTGAACCCACGAAAGCTACGATA	0	0	0	0	0	0	0	0	0	0	0	0	0	0	0	0	0	0	0	2	0	0	0	0	0	0	0	0	0	0	0	3	5	3	0	1	0	7
OTU_811	Chordata	Actinopteri	Perciformes	Gasterosteidae			91.975	Midori2	GCGGTTAAACGAGAGGCCCTAGTTAATAATACACGGCGTAAAGGGTGGTTAAGCTAAAATTAAAATTAAAGCCGAACACCCCCAAAGCTGTTATACGCATCCGGAGGTGAGAAGTTCAACCACGAAGGTGGCTTTATAGCCCCTGAACCCACGAAAGCTACGATA	0	0	0	1	0	4	0	0	0	0	0	0	0	0	0	0	0	0	2	6	25	7	3	0	6	0	9	11	1	9	0	6	2	6	29	24	0	0
OTU_812	Chordata	Mammalia	Rodentia	Myocastoridae	Myocastor	Myocastor coypus	97.561	Midori2	GCGGTCATACGATTAACCCTGATTAATAAACCCCGGCGTAAAGAGTATTAAAGATACAATAAAAATAAGATTAAATTTCATCTGGGTCGTAAAAAACTATAGATAAAAATAAAATCGATACCGAGGGCAATCTTAATATACCAGAATATACTAAAGCTAAGACA	0	30	0	0	0	0	0	0	0	0	0	0	0	4	0	5	5	0	0	0	12	0	9	189	0	10	3	0	0	5	0	0	0	12	0	0	0	0
OTU_813	Chordata	Actinopteri	Gobiiformes	Gobiidae	Neogobius		96.988	Midori2	GCGGTTATACGAGAGGCCCAAGTTGACAAAAATCGGCGAAAAGCGTGGTTAGTGATATCACCTCCACTAAAGCCAAACACCTTCATCTGTAATACGCTCCCGAAGACAGGAAGCCCAATCACGAAAGTAGCTTTAATTTCCATGAAGCCACGAAAGCTAGGAAA	3	1	0	1	2	0	0	1	0	1	0	0	0	0	0	0	4	4	0	4	0	0	2	0	4	2	0	1	2	0	4	0	1	0	2	7	0	0
OTU_814	Chordata	Actinopteri	Cypriniformes	Leuciscidae	Leuciscus	Leuciscus leuciscus	97.661	Midori2	GCGGTTAAGCGAGAGGCCCTAGTTAATAATACACGGCGTAAAGGGTGGTTAAGGAAAGCCCAATAATAAAGCCAAATGGCCCTTTGGCTGTCATACGCTTCTAGGTGTCCGAAGCCCAATATACGAAAGTAGCTTCAACAAAGCCCACCTGACCCCACGAAAGCTGAGAAA	0	0	29	0	0	22	47	0	27	47	28	17	3	24	48	56	11	16	5	0	14	5	51	0	40	54	7	29	35	6	2	12	32	31	28	21	7	7
OTU_815	Chordata	Actinopteri	Cypriniformes	Cyprinidae	Barbus		95.294	Midori2	GCGGTTATACGAGGGGCTCAAATTGATATTACACGGCGTAAAGGGTGGTTAGGGATAAATAATAATAAAGCCAAATGGCCCCTTGGCCGTCATACGCTTCTAGGTGTCCGAGGCCCTATATACGAAAGTAGCTTTAATTAACCCGCCTGACCCCACGAAAACTGAGAAA	0	4	0	1	0	0	0	0	0	0	0	0	4	0	0	2	0	0	0	0	8	4	5	0	1	4	0	0	0	4	0	4	1	5	0	3	5	2
OTU_816	Chordata	Actinopteri	Cypriniformes	Cyprinidae			92.442	Midori2	GCGGTTATACGAGAGGCCCAAGTTGATAGACATCGGCGTAAAGCGTGGTTAAGGAAAGTATTAACAATAAAGCCAAATGGCCCCTTGGCCGTCATACGCTTCTAGGTGTCCGAGGCCCTATATACGAAAGTAGCTTTAATTAACCCGCCTGACCCCACGAAAACTGAGAAA	0	0	0	0	0	0	0	0	0	0	0	0	0	0	0	5	0	1	0	10	14	4	9	0	1	0	3	2	0	7	0	3	0	0	4	3	7	0
OTU_817	Chordata	Actinopteri	Cypriniformes	Leuciscidae	Rutilus		96.403	Midori2	GCGGTTAAACGAGAGGCCCTAGTTAATAATACACGGCGTAAAGGGTGGTTAAGGGAAGCACAATAATAAAGCCAAATGGCCCTTTGGCTGTCATATGCTTCTAGGTGTCCGAAGTTCAGCATACGAAAGTAGCTTTAATTTTCATGAAGCCACGAAAGCTAGGAAA	0	0	0	0	0	1	0	0	0	0	0	0	0	0	0	4	2	0	2	21	3	17	7	0	0	0	10	8	1	7	0	18	8	8	8	18	20	11
OTU_818	Chordata	Actinopteri	Perciformes	Percidae	Perca		96.386	Midori2	GCGGTTATACGAGAGGCCCAAGTTGATAGACATCGGCGTAAAGCGTGGTATATTAAAGACAATACTAAAGCCGAACACCTTCAGAGCTGTTATACGCACCCGAAGGTAAGAAGTTCAACCACGAAAGTGGCTTTATTACCCCTGAACCCACGAAAGCTACGATA	0	0	0	6	0	10	0	3	1	5	1	0	3	4	2	0	3	7	8	23	36	45	43	0	10	9	39	33	27	22	0	22	37	45	38	87	90	45
OTU_819	Chordata	Actinopteri	Perciformes	Gasterosteidae	Gasterosteus	Gasterosteus aculeatus	100	Midori2	ATGAAGGACGAGAGGCCCAAGTTGATGAATTACGGCGTAAAGAGTGGTTAAGCTAAAATTAAAACTAAAGCCGAACACCCCCAAAGCTGTTATACGCATCCGGAGGTGAGAAGTTCAACCACGAAGGTGGCTTTATCTAACCTGAACCCACGAAAGCTACGGCA	0	0	0	0	0	0	0	0	9	0	0	1	0	0	0	0	0	0	0	0	0	0	7	0	0	1	2	0	0	5	0	0	0	0	2	4	0	6
OTU_821	Chordata	Actinopteri	Cypriniformes	Leuciscidae	Leuciscus	Leuciscus leuciscus	97.661	Midori2	GCGGTTAAACGAGAGGCCCTAGTTAATAATACACGGCGTAAAGGGTGGTTAGGGAAAGCACAATAATAAAGCCAAATGGCCCTTTGGCTGTCATACGCTTCTAGGTGTCCGAAGCCCAGTATACGAAAGTAGCTTTAATAATGCCCACCTGACCCCACGAAAGTTGAGAAA	0	0	25	0	0	19	21	0	11	9	85	0	0	7	22	18	1	0	3	0	7	5	81	0	10	24	6	19	7	4	0	4	9	6	14	1	3	0
OTU_822	Chordata	Actinopteri	Gobiiformes	Gobiidae	Neogobius		96.988	Midori2	GCGGTTATACGAGAGGCCCAAGTTGACAAAAATCGGCAAAAAGCGTGGTTAGTATACCACCTCCACTAAAGCCAAACACCTTCAAGGCTGTAATACGCCCCCGAATACATGAAGCCCAATCACGAAAGTAGCTTTAATTTTCATGAAGCCACGAAAGCTAGGAAA	0	0	0	0	0	0	0	0	0	0	0	0	0	0	0	0	0	0	0	0	0	0	0	0	0	19	0	0	0	0	0	0	0	0	0	0	0	0
OTU_823	Chordata	Actinopteri	Gobiiformes	Gobiidae	Neogobius	Neogobius melanostomus	98.734	Midori2	TCTGTTATACGAGAGGCCCAAGTTGACAAAAATCGGCGAAAAGCGTGGTTAGTTATATCACCTCCACTAAAGCCAAACACCTTCAAGGCTGTAATACGCCCCCGAAGACAGGAACCCCAATCACGAAAGTAGCTTTAATTTTCATGAAGCCACGAAAGCTAAAA	0	0	0	0	0	0	0	0	0	0	0	0	0	0	0	0	0	0	0	0	0	0	0	0	0	0	1	0	0	1	0	7	0	0	0	0	0	0
OTU_824	Chordata	Actinopteri	Cypriniformes	Tincidae	Tinca		95.376	Midori2	GCGGTTAGACGAGAGGCCCTAGTTGATATTATAACGGCGTAAAGGGTGGTTAGGGATAAATTATAATAAAGCCAAATGGCCCCTTGGCCGTCATACGCTTCTAGGCGCCCGAAGCCCAACCACACGAAAGTAGCTTTAACAAAGCCCACCTGACCCCACGAAAGCTGAGAAA	0	0	0	0	0	0	0	0	0	0	0	0	0	0	0	0	0	0	0	0	78	4	7	0	17	11	3	9	0	13	0	3	0	37	9	11	8	0
OTU_825	Chordata	Actinopteri	Cypriniformes	Leuciscidae	Rutilus	Rutilus rutilus	97.661	Midori2	GCGGTTAAACGAGAGGCCCTAGTTAATAATACACGGCGTAGAGGGTGGTTAAGGGAAGCACAATAATAAAGCCAAATGGCCCTTTGGCCGTCATACGCTCCTAGGTGTCCGAAGCCCAATGTACGAAAGTAGCTTTAATAAAGCCCACCTGACCCCACGAAAGCTGAGAAA	0	0	81	81	13	82	0	1	18	1	26	0	0	0	3	40	0	14	17	10	0	10	0	0	31	0	4	8	13	11	2	5	10	5	3	3	39	1
OTU_826	Chordata	Actinopteri	Perciformes	Percidae	Perca	Perca fluviatilis	98.16	Midori2	GCGGTTATACGGGAGGCCCAAGTTGATGGACATCGGCGTAAAGCGTGTTTAAGATTAAAGACAATACTAAAGCCGAACACCTTCAGAGCTGTTATACGCATCCGAAGGTAAGAAGTTCAACCACGAAAGTGGCTTTATAGCCCCTGAACCCACGAAAGCTACGGCA	0	1	4	0	2	4	8	0	0	4	6	0	0	1	4	4	1	4	1	5	5	3	2	0	2	0	4	3	0	3	5	1	3	5	3	150	8	3
OTU_827	Chordata	Actinopteri	Anguilliformes	Anguillidae	Anguilla		96.407	Midori2	GCGGTTATACGAGGGGCTCAAATTGATATTACGCGGCGTAAAGCGTGATTaaaaaacaaaaaaaCTAAAGCCAAACACTTTCCTCTGTCATACGCTACCGGAACATAAACGAAGCCCTATAACGAAAGTAGCTTTAACACCTTTGAACTCACGACAGTTGAGAAA	0	0	0	0	0	0	0	0	0	0	0	0	0	0	0	0	0	0	0	0	0	1	0	0	0	2	0	9	0	0	0	2	0	0	0	0	3	0
OTU_828	Chordata	Actinopteri	Cypriniformes	Cyprinidae	Barbus	Barbus barbus	97.561	Midori2	GCGGTTAGACGAGAGGCCCTAGTTGATATTATAACGACGTAAAGGGTGGTTAGGGATAAATAATAATAAAGCCAAATGGCCCCTTGGCCGTCATACGCTTCTAGGTGTCCCATGCCCTATATACGAAAGTAGCTTTAATTGACCCGCCTGACCCCACGAAAGCTACGATA	0	0	3	6	0	0	0	0	0	0	0	0	1	0	0	6	1	0	0	0	1	2	0	0	0	0	5	17	0	2	2	4	4	3	136	0	0	3
OTU_829	Chordata	Actinopteri	Cypriniformes	Leuciscidae	Abramis	Abramis brama	97.633	Midori2	GCGTTAAACGAGAGGCCCCAGTTAATAATACACGGCGTAAAGGGTGGTTAAGGAAACTATTAACAATAAAGCCGAATGGCCCTTTGGCTGTCATACGCTTCTAGGTGTCCGAAGTTCAACATACGAAAGTAACTTTAATAAACCCACCTGACCCCACGAAAGCTGAGAAA	0	0	0	0	0	0	0	0	0	0	0	0	0	0	0	0	0	0	0	7	0	28	2	0	4	0	1	0	0	5	0	1	3	3	5	16	5	0
OTU_830	Chordata	Actinopteri	Cypriniformes	Leuciscidae			93.023	Midori2	GCGGTTATACGAGAGGCCCAAGTTGATAGACATCGGCGTAAAGGGTGGTTAAGGAAAACATGATAATAAAGCCGAATGGCCCTTTAGCTGTCATACGCTTCTAGGTATCCGAAGCCCAATATACGAAAGTAGCTTTAATAACGCCCACCTGACCCCACGAAAGCTGAGAAA	0	0	0	0	0	0	0	0	0	0	0	0	0	0	0	0	0	0	0	0	0	0	0	0	0	0	0	0	0	0	0	0	0	0	0	4	0	0
OTU_831	Chordata	Actinopteri	Cypriniformes	Leuciscidae	Leuciscus		96.512	Midori2	GCGGTTATACGAGAGGCCCTAGTTAATAATACACGGCGTAAAGGGTGGTTAAGGAAAGTATTAACAATAAAGCCGAATGGCCCTTTTGCTGTCATACGCTTCTAGGTGTCCGAAGTCCAATATACGAAAGTAGCTTTAATAAAGTCCACCTGACCCCACGAAAGCTGAGAAA	0	0	2	2	0	0	0	7	0	0	0	0	3	0	0	2	0	0	0	6	11	4	7	0	8	0	3	10	3	12	0	8	7	8	13	19	8	5
OTU_832	Chordata	Actinopteri	Cypriniformes	Leuciscidae			96.491	Midori2	GCGGTTAAACGAGAGGCCCCAGTTAATAATACACGGCGTAAAGGTTGGTTAAGGAAAGCATTACAATAAAGCCGAATGGCCCTTTGGCTGTCATACGCTTCTAGGTGTCCGAAGCCCAATATACGAAAGTAGCTTTAATAAGCCCCACCTGACCCCACGAAAGCTGAGGAA	0	0	0	0	0	0	0	0	0	0	0	0	0	0	0	0	0	0	0	0	0	0	0	0	0	0	0	0	42	0	0	0	0	0	0	0	0	0
OTU_833	Chordata	Actinopteri	Gobiiformes	Gobiidae	Neogobius	Neogobius melanostomus	98.765	Midori2	GCTTTATACGAGAGGCCCAAGTTGACAAAAATCGGCGAAAAGCGTGGTTAGTGATATCACCTCCACTAAAGCCAAACACCTTCAAGGCTGTGATACGCCCCCGAAGACAGGAAGCCCAATCACGAAAGTAGCTTTAATTTTCATGAAGCCACGAAAGTTAGGAAA	5	4	5	1	1	1	2	0	0	0	3	2	4	0	1	0	2	0	2	1	0	2	5	0	1	0	2	3	2	4	0	3	4	3	100	3	2	6
OTU_834	Chordata	Actinopteri	Perciformes	Percidae	Sander	Sander lucioperca	97.468	manual check	GCGGTTATACGAGAGGCCCAAGTTGATAGACATCGGCGTAAAGCGTGGTTAAGACAAAAACAAAACTAAAGCCGAACACCTTCAGAGCTGTTATACGCACCCGAAGGTAAGAAGTTCAACCACGAAAGTGGCTTTATCTAACCTGAACCCACGAAAGCCAGCA	0	3	1	11	5	8	6	10	14	2	9	2	4	5	2	4	5	7	13	37	82	60	64	0	22	17	57	77	7	74	0	47	48	56	78	138	68	28
OTU_835	Chordata	Actinopteri	Anguilliformes	Anguillidae	Anguilla		95.714	Midori2	GCGGTTATACGAGAGGCCCAAGTTGATAGACATCGGCGTAAAGCGTGATTaaaaaacaaaaaaaCTAAAGCCAAACACTTCCCAAGCTGTCATACGCTACCGGAACATAAACGAAGCCCTATAACGAAAGTAGCTTTAATTTTCATGAAGCCACGAAAGCTAGGAAA	0	0	0	0	0	0	0	0	0	0	0	0	0	0	0	0	0	0	0	2	3	2	3	0	2	0	2	2	0	0	0	0	5	1	1	9	2	4
OTU_836	Chordata	Actinopteri	Gobiiformes	Gobiidae	Neogobius		96.988	Midori2	GCGGTTATACGAAGGCCCAAGTTGACAAGAATCGGCGAAAAGCGTGGTTAGTGATATCACCTCCACTAAAGCCAAACACCTTCAAGGCTGTAATACGCCCCCGAAGACAGGAGGCCCAATCACGAAAGTAGCTTTAATTTTCATGAAGCCACGAAAGCTGAGAAA	10	6	7	5	1	7	2	1	9	3	5	2	3	8	6	6	5	5	2	3	6	2	3	5	3	0	6	1	5	8	5	7	2	1	4	5	3	3
OTU_837	Chordata	Actinopteri	Cypriniformes	Leuciscidae	Abramis	Abramis brama	98.193	Midori2	GCTGTTAAACGAGAGGCCCCAGTTAATAATACACGGCGTAAAGGGTGGTTAAGGAAAGTATTAACAATAAAGCCGAATGGCCCTTTTGCTGTCATACGCCTCTAGGTGTCCGAAGTTCAACATACGAAAGTAGCTTTAATAACGCCCACCTGACCCCACGAAAGCTACGGCA	0	0	0	0	0	0	0	0	0	0	0	0	0	0	0	0	0	0	0	0	4	0	0	0	6	0	0	0	0	0	0	0	0	4	0	0	6	0
OTU_838	Chordata	Actinopteri	Cypriniformes	Leuciscidae			94.737	Midori2	GCGGTTAAACGAGAGGCCCTAGTTAATGATACACGGCGTAAAGGGTGGTTAAGGAAAACATAATAATAGAGCCAAATGGCCCTTTGGCTGTCATACGCTTCTAGGAGTCCGAAGCCCTAATACGAAAGTAACTTTAATAAACCCACCTGACCCCACGAAAGCTGAGAAA	0	0	0	0	0	0	2	4	2	1	10	0	0	0	0	2	0	0	7	6	0	0	0	0	0	0	0	1	0	18	0	4	12	4	6	10	2	2
OTU_839	Chordata	Actinopteri	Cypriniformes	Leuciscidae	Squalius	Squalius cephalus	97.661	Midori2	GCGGTTAAACGAGAGGCCCTAGTTAATAATACACGGCGTAAAGGGTGGTTAAGGAAAACATGACAATAAAGCCGAATGGCCCTTTGGCTGTCATACGCTTCTAGGTGTCCGAAGCCCAATATACGAAAGTAGCTTTAATCAAGTCCACCTGACCCTACGAAAGCTGAGGAA	0	30	17	19	42	13	20	47	23	18	16	37	19	20	25	32	11	24	14	10	16	4	25	0	14	15	12	5	11	34	0	8	5	12	19	16	36	18
OTU_840	Chordata	Actinopteri	Perciformes	Percidae	Perca		96.386	Midori2	GCGGTTATACGAGAGGCCCAAGTTGATACATCGGCGTAAAGCGTGGTTAAGATTAAAGACAATACCAAAGCCGAACACCTTCAGAGCTGTTATACGCACCCGAAGGTAAGAAGTTCAACCACGAAAGTGGCTTTATTACCCCTGAACCCACGAAAGCTACGATA	0	4	0	13	0	0	0	2	1	3	0	0	1	3	0	0	5	6	2	4	7	12	6	0	0	11	10	4	7	16	0	6	9	8	10	19	33	11
OTU_841	Chordata	Actinopteri	Gobiiformes	Gobiidae	Neogobius		96.386	Midori2	GCGGTTATACGAGAGGCCCAAGTTGACAAAAATCGGCGAAAAGCGTGGTTAGTGGCATCACCTCCACTAAAGCCAAACACCTTCAAGGCTGTAATACGCCCCCGAAGACAGCCCAATCACGAAAGTAGCTTTAATTTTCATGAAGCCACGAAAGCTAGGAAA	1	1	4	2	3	6	0	0	3	2	0	2	7	1	2	0	1	1	0	0	2	1	1	3	2	0	1	0	0	0	4	2	0	1	1	38	0	0
OTU_842	Chordata	Actinopteri	Cypriniformes	Leuciscidae			94.22	Midori2	GCGGTTAGACGAGAGGCCCTAGTTGATATTACAACGGCGTAAAGGGTGGTTAAGTATTAACAATAAAGCCGAATGGCCCTTTGGCTGTCATACGCTTCTAGGTGTCCGAAGTTCAACATACGAAAGTAGCTTTAATAACGCCCACCTGACCCCACGAAAGCTGAGAAA	34	76	222	175	191	388	292	176	108	121	204	265	299	218	240	469	326	285	401	392	495	487	549	99	401	95	260	161	132	602	54	421	276	265	591	541	472	335
OTU_844	Chordata	Actinopteri	Gobiiformes	Gobiidae	Neogobius		96.988	Midori2	GCGGTTATACGAGAGGCCCAAGTTGACAAAAATCGGCGAAATCGTGGTTAGTGATATCACCTCCACTAAAGCCAAACACCTTCAGGGCTGTAATACGCCCCCGAAGACAGGAAGTCCAATCACGAAAGTAGCTTTAATTTTCATGAAGCCACGAAAGCTAGAAAA	4	0	3	0	0	0	6	0	1	0	6	2	0	1	2	0	0	0	2	6	1	3	0	0	1	75	0	0	1	2	0	3	0	1	0	2	0	1
OTU_845	Chordata	Actinopteri	Cypriniformes	Cyprinidae	Barbus		95.882	Midori2	GCGGTTATACGAGAGGCCCAAGTTGATATTATATGGCGTAAAGGGTGGTTAGGGAAATAATAATAAAGCCAAATGGCCCCTTGGCCGTCATACGCTTCTAGGTGTCCGAGGCCCTATATACGAAAGTAGCTTTAATTAACCCGCCTGACCCCACGAAAACTGAGAAA	0	12	0	2	0	3	0	0	1	1	1	0	1	1	0	1	1	3	0	10	12	3	19	0	14	12	4	5	0	2	0	207	1	0	0	0	0	0
OTU_846	Chordata	Actinopteri	Perciformes	Percidae	Perca		96.386	Midori2	GCGGTTATACGAGAGGCCCAAGTTGACAAAAATCGGCGTAAAGCGTGGTATATTAAAGACAATACTAAAGCCGAACACCTTCAGAGCTGTTATACGCATCCGAAGGTAAGAAGTTCAACCACGAAAGTGGCTTTATAGCCCCTGAACCCACGAAAGCTACGATA	0	5	8	4	5	6	12	10	5	6	1	0	4	3	0	9	5	15	4	28	25	20	21	0	11	8	24	19	31	21	3	26	32	16	28	42	19	18
OTU_847	Chordata	Actinopteri	Gobiiformes	Gobiidae	Neogobius		96.988	Midori2	GCGGTTATACGAGTGCCCAAGTTGACAAGAATCGGCGAAAAGCGTGGTTAGTGGTATCACCTCCACTAAAGCCAAACACCTTCAAGGCTGTAATACGCCCCCAAGACAGGAAGCCCAATCACGAAAGTAGCTTTAATTTTCATGAAGCCACGAAAGCTAGGAAA	0	0	0	0	0	0	0	0	0	0	0	0	0	0	0	0	0	0	0	0	0	0	0	0	0	0	0	0	58	0	0	0	0	0	0	0	0	0
OTU_848	Chordata	Actinopteri	Perciformes	Percidae	Perca	Perca fluviatilis	97.561	Midori2	GCGGTTATACGAGAGGCCCGAGTTGATAGACATCGGCGTAAAGCGTGGTTAAGATTAAAGACAATACTAAAGCCGAACACCTTCAGAGCTGTTATACGCATCCGAAGGTGAGAGGTTCAACCACGAAAGTGGCTTTATAGCCCCTGAACCCACGAAAGCTAGGAAA	0	2	10	3	3	1	4	5	2	0	1	4	0	0	2	1	0	1	2	8	9	13	9	2	2	7	11	10	6	8	1	10	9	8	15	5	12	10
OTU_849	Chordata	Actinopteri	Gobiiformes	Gobiidae	Neogobius		96.988	Midori2	GCGGTTATACGAGAGGCCCAAGTTGACAAAAATCGGCGAAAAGCGTGGTTAGTGATATCACCTCCACTAAAGCCAAACACCTTCATGCTGTAATACGCCCCCGAAGACAGGAAGCCCAATCACGAGGGTAGCCTTAATTTTCATGAAGCCACGAAAGCTAGGAAA	0	1	1	0	0	0	0	0	0	0	0	0	0	0	0	0	1	1	0	0	0	8	0	0	15	1	5	19	0	5	1	7	10	8	11	28	4	0
OTU_850	Chordata	Actinopteri	Cypriniformes	Leuciscidae	Leuciscus		97.576	Midori2	GCGGTTAAACGAGAGGCCCCAGTTAATAATACACGGCGTAAAGGGTGGTTAAGGAAAGCAGCAATAAAGCCGAATGGCCCTTTGGCTGTCATACGCTTCTAGGTGTCCGAAGCCCAATATACGAAAGTAGCTTTAATAAAGCCCACCTGACCCCACGAAAGCTACGATA	2	1	1	10	0	3	6	1	2	2	0	1	0	5	4	6	1	3	6	28	45	48	19	0	15	0	21	29	8	23	0	26	70	21	60	68	42	41
OTU_851	Chordata	Actinopteri	Perciformes	Percidae	Perca	Perca fluviatilis	97.561	Midori2	GCGGCTATACGAGGGGCCCAAGTTGATAGACATCGGCGTAAAGCGTGGTTAAGATTAAAGACAATACTAAAGCCGAACACCTTCAGAGCTGTTATACGCATCCGAAGGTAAGAAGTTCAACCACGAAAGTGGCTTTATAGCCCCTGAATCCACGAAAGCTAGGAAA	2	8	6	3	5	7	7	10	6	6	5	4	1	8	3	5	6	13	8	23	24	27	24	0	15	13	29	23	22	23	2	25	19	23	22	21	17	14
OTU_852	Chordata	Actinopteri	Cypriniformes	Cyprinidae			96.491	Midori2	GCGGTTAGACGAGAGGCCCTAGTTGATATTATAACGGCGTAAAGGGTGGTTAGGGATAAATAATAATAAAGCCAAATGGCCCCTTGGCCGTCATACGCTTCTAGGTGTCCGAGGCCCTATATACGAAAGTAGCTTTAGTACCGCCCACCTGACCCCACGAAAACTGAGAAA	0	40	28	33	10	24	10	7	18	0	29	3	18	6	17	131	18	11	20	23	80	30	18	0	25	6	22	37	5	42	12	8	11	25	7	19	27	6
OTU_853	Chordata	Actinopteri	Cypriniformes	Leuciscidae	Abramis	Abramis brama	98.193	Midori2	GCGGTTAAACGAGGGGCCCCAGTTAATAATACACGGCATAAAGGGTGGTTAAGGAAAGTATTAACAATAAAGCCGAATGGCCTTTTGGCTGTCATACGCTTCTAGGTGTCCGAAGTTCAACATACGAAAGTAGCTTTAATAACGCCCACCTGACCCCACGAAAGCTACGATA	4	0	0	0	0	0	0	0	0	0	0	0	0	0	0	0	0	5	0	4	0	8	6	0	1	4	7	12	0	0	0	1	0	6	36	0	1	1
OTU_854	Chordata	Actinopteri	Cypriniformes	Leuciscidae	Leuciscus		95.322	Midori2	GCGGTTAAACGAGAGGCCCTAGTTAATAATACACGGCGTAAAGGGTGGTTAAGGAAAGCATAACAATAAAGCCGAATGGCCCTTCTGTCATACGCTTCTAGGAGTCCGAAGCCCTAATACGAAAGTAACTTTAATAAACCCACCTGACCCCACGAAAGCTGAGAAA	0	10	114	80	55	191	205	78	49	64	151	73	161	161	204	549	243	223	290	163	212	240	225	0	252	57	147	123	138	471	0	283	142	191	1346	909	614	337
OTU_855	Chordata	Actinopteri	Gobiiformes	Gobiidae	Neogobius	Neogobius melanostomus	97.576	Midori2	GCGGTTAAACGAGAGGCCCCAGTTGACAAAAATCGGCGAAAAGCGTGGTTAGTGATATCACCTCCACTAAAGCCAAATACCTTCAAGGCTGTAATACGCCCCCGAAGACAGGAAGCCCAATCACGAAAGTAGCTTTAATCTTCATGAAGCCACGAAAGCTAGGAAG	4	6	9	18	5	19	14	8	15	4	4	11	4	9	4	10	13	6	15	16	10	19	22	0	15	11	7	12	2	11	2	14	15	11	14	20	5	12
OTU_856	Chordata	Actinopteri	Perciformes	Percidae	Sander		96.364	Midori2	GCGGTTATACGAGTGCCCAAGTTGATAGACATCGGCGTAAAGCGTGGTTAAGACAAAAACAAAACTAAAGCCGAACACCTTCAGAGCTGTTATACGCACCCGAAGGTAAGAAGTTCAACCACGAAGGTGGCTTTATAGCCCCTGAACCCTCGAAAGCTACGATA	0	0	0	0	0	0	0	0	0	0	1	1	0	0	0	0	0	0	0	3	5	5	3	0	0	0	1	0	3	5	0	3	4	32	1	8	2	1
OTU_857	Chordata	Actinopteri	Cypriniformes	Cyprinidae			90.361	Midori2	GCGGTTAAACGAGAGGCCCTAGTTAATAATACACGGCGTAAAGGGTGGTTAAGGATAAACAAAAATAAAGTCAAATGGCCCCTTGGCCGTCATACGCTTCTAGGAGTCCGAAGCCCAATCACGAAAGTAGCTTTAATTTTCATGAAGCCACGAAAGCTAGGAAA	0	6	7	15	7	22	12	13	8	3	4	9	24	4	18	18	25	18	11	21	17	28	24	0	12	2	41	15	4	37	0	18	22	20	37	34	23	34
OTU_858	Chordata	Actinopteri	Perciformes	Percidae	Perca	Perca fluviatilis	98.75	Midori2	GCGGTTATACGAGAGGCCCAAGTTGATAGACATCGGCGTAAAGCGTGGTTAAGATTAAAGACAATACTAAAGCCGAACACCTTCAGAGCTGTTATACGCATCCGAAGGTAAGAAGTTCAACCACGAAAGTGACTTTATAGCCCCTGAACCCACGAAGGCTTAGAAA	8	8	4	5	2	3	7	9	6	1	3	4	7	2	1	6	9	5	6	29	33	30	19	15	7	20	26	18	21	19	7	20	12	15	25	33	22	22
OTU_859	Chordata	Actinopteri	Gobiiformes	Gobiidae	Neogobius	Neogobius melanostomus	98.758	Midori2	GCGGTTATACGAGAGGCCCAAGTTGACAAAAATCGGCGAAAAGCGTGGTTAGTGATATCACCCTCACTAAAGCCAAACACCTTCAAGGCTGTAATACGCCCCCGAAGACAGGAAGCCCAATCACGAAAGTAGCTTTAATTTTCATGAAGCCACGAAAGCTACGGCA	7	16	14	5	4	4	2	13	17	12	9	3	5	9	7	10	7	2	9	17	54	29	17	6	27	11	34	34	22	32	9	34	10	27	45	42	32	16
OTU_860	Chordata	Actinopteri	Cypriniformes	Leuciscidae	Abramis	Abramis brama	98.193	Midori2	GCGTTTAAACGAGAGGCCCCAGTTAATAATACACGGCGTAAAGGGTGGTTAAGGAAAGTATTAACAAAAGCCGAATGGCCCTTTGGCTGTCATACGCTTCTAGGTGTCCGAAGTTCAACATACGAAAGTAGCTTTAATAACGCCCACCTGACCCCACGAAAGCTACGATA	0	2	2	1	1	0	0	5	0	4	2	0	2	2	1	4	0	5	0	19	15	11	26	0	10	1	40	234	8	18	0	9	14	22	34	43	21	21
OTU_861	Chordata	Actinopteri	Cypriniformes	Leuciscidae			97.076	Midori2	TCGGTTAAACGAGAGGCCCCAGTTAATAATACACGGCGTAAAGGGTGGTTAAGGAAAGTATTAACAATAAAGCCGAATGGCCCTTTGGCTGTCATACGCTTCTATGTGTCCGAAGCCCAATATACGAAAGTAGCTTTAATAAAGCCCACCTGACCCCACGAAAGCTGAAAAA	7	2	6	6	0	0	10	2	9	1	3	2	0	3	3	8	8	6	5	35	51	54	103	0	77	2	29	10	7	130	0	31	83	106	45	54	78	141
OTU_863	Chordata	Actinopteri	Perciformes	Gasterosteidae	Gasterosteus		96.226	Midori2	GCGGTTATACGAGAGGCCCAAGTTGATAGACATCGGCGTAAAGCGTGGTTAAGCTAAAATTAAAACTAAAGCCGAACACCCCCAAAGCTGTTATACGCATCCGGAGGTGAGAAGTTCAACCACGAAGGTGGCTTTATCTAACCTGAACCCACGAAAGCTGAGAAA	0	62	30	27	44	36	26	82	84	33	31	24	24	23	13	53	43	25	38	102	427	182	204	0	178	93	265	357	111	234	35	227	108	130	334	318	132	95
OTU_864	Chordata	Actinopteri	Gobiiformes	Gobiidae	Neogobius	Neogobius melanostomus	98.193	Midori2	GCGGTTATACGAGAGGCCCAAGTTGACAAAAATCGGCGAAAAGCGTGGTTAGTGATATCACCTCCACTAAAGCCAAACACCTTCAAGGCTGTAATACGCCCCCGAAGACAGGAAGCCCAATCACGAAAGTAGCTTTAATTTCATAAACCACGAAAGCTAGGAAA	27	15	6	10	11	7	4	7	11	9	11	12	3	12	16	5	11	5	10	16	29	35	190	5	50	40	30	33	29	33	14	59	58	40	45	43	39	468
OTU_865	Chordata	Actinopteri	Cypriniformes	Leuciscidae	Abramis		95.882	Midori2	GTGGTTAAACGAGAGGCCCCAGTTAATAATACACGGCGTAAAGGGTGGTTAAGGAAAGTATTAACAATAAAGCCGAATGGCCCTTTGGCTGTCATACGCTTCTAGGTGTCCGAAACCCAATATACGAAAGTAGCTTTAATAAGGCCCACCTGACCCCACGAAAGCTAGGAAA	5	7	11	7	3	10	3	4	5	2	8	4	2	2	2	5	9	5	9	19	13	19	3	0	16	0	12	18	10	9	0	11	7	8	12	42	35	36
OTU_866	Chordata	Actinopteri	Cypriniformes	Leuciscidae	Squalius	Squalius cephalus	97.076	Midori2	GCGGTTAAACGAGAGGCCCCAGTTAATAATACACGGCGTAAAGGGGGTTAAGGAAAACATAACAATAAAGCCGAATGGCCCTTTGGCTGTCATACGCTTCTAGGTGTCCGAAGCCCAATATACGAAAGTAGCTTTAATAAAGTCCACCTGACCCCACGAGAGCTGGGAAA	0	437	202	482	214	342	330	306	229	196	138	307	150	200	299	361	144	268	320	372	831	274	546	0	378	234	233	329	134	479	0	253	172	301	323	326	635	267
OTU_867	Chordata	Actinopteri	Gobiiformes	Gobiidae			93.976	Midori2	GCGGTTATACGAGAGGCCCAAGTTGACAAAAATCGGCGAAAAGCGTGGTTAAGACAAAAACAAAACTAAAGCCGAACACCTTCAAGGCTGTAATACGCCCCCGAAGACAGGAAGCCCAATCACGAAAGTAGCTTTAATTTTCATGAAGCCACGAAAGCTAGGAAA	0	5	10	25	12	25	13	14	5	14	9	6	17	19	11	12	21	21	17	49	44	76	41	0	22	25	94	39	22	52	0	70	71	87	78	181	123	50
OTU_872	Chordata	Actinopteri	Gobiiformes	Gobiidae	Neogobius		96.988	Midori2	GCGGTTATACGAGAGGCCCAAGTTGACAAAAATCGGCGAAAAGCGTGGTTAGTGATATCACCTCCACTAACGCCAAACACCTTCAAGGCTGTAATACGCCCCCCAAGACGAAGCCCAATCACGAAAGTAGCTTTAATTTTCATGAAGCCACGAAAGCCAGGAAA	0	0	0	0	0	0	0	0	0	0	0	0	0	0	0	0	0	0	0	0	0	0	0	0	0	0	0	0	0	2	0	0	0	0	0	0	0	0
OTU_879	Chordata	Mammalia	Rodentia	Castoridae	Castor	Castor fiber	98.171	Midori2	GCGGTCATACGATAGACCCAAACTAATAAACCCCGGCGTAAAGCGTGTTTAAGAGCCTTACCCTGAATAAGAATAAACTTTACCTAGGCCGTAAAAAGCTATAGCTAAGAAAAAAATAACTTACGAAAGTAATCTTAATAAGTCTGATAACACGAAAGCTACGATA	0	0	0	0	0	0	0	0	0	0	2	0	0	0	0	5	1	0	0	0	6	3	0	0	0	0	1	0	2	12	0	1	0	9	0	0	0	0
OTU_881	Chordata	Actinopteri	Perciformes	Percidae			91.139	Midori2	GCGGTTATACGAGAGGCCCAAGTTGATAGACATCGGCGTAAAGCGTGGTTAAGATTAAAGACAATACTAAAGCCGAACACCTTCAGAGCTGTTATACGCATCCGAAGACAGGAAGCCCAATCACGAAAGTAGCTTTAACACCTTTGAACTCACGACAGTTGAGGAA	0	0	0	0	0	0	0	0	0	0	0	0	0	0	0	0	0	0	0	0	0	0	0	0	0	0	0	1	0	0	0	1	1	0	0	2	0	3
OTU_891	Chordata	Mammalia	Artiodactyla	Suidae	Sus		96.97	Midori2	GCGGTTATACGAGAGGCCCAAATTAATAGATCCACGGCGTAAAGAGTGTTTAAGaaaaaaaaTCACAATAGAGTTAAATTATAACTAAGCTGTAAAAAGCCCTAGTTAAAATAAAATAACCCACGAAAGTGACTCTAATAATCCTGACACACGATAGCTAGGACC	0	0	0	0	0	0	0	0	0	0	0	0	0	0	0	0	0	0	0	0	0	0	3	0	0	0	5	0	0	0	0	0	0	0	0	0	0	0
OTU_899	Chordata	Actinopteri	Gobiiformes	Gobiidae	Ponticola	Ponticola kessleri	98.171	Midori2	GCGGTTATACGAGAGGCCCGAGTTGACAAACATTCGGCGTAAAGCGTGGTTAATAACTTATTTACTAAAGCCAAACACCTTTAAGGCTGTTATACGCCCCCAAAGGTAGGAAGACCCCTCACGAAAGTAGCTTTAATTACTATGAATCCACGACAGTTGAGGAA	0	0	0	0	0	0	0	0	0	0	0	0	0	0	0	0	0	0	0	0	0	4	0	0	1	0	0	0	0	0	0	0	0	0	0	0	1	2
OTU_900	Chordata	Actinopteri	Perciformes	Percidae	Perca	Perca fluviatilis	98.125	Midori2	GCGGTTATACGAGAGGCCCAAGTTGATAGACGTCGGCGTAAAGCGTGGTTAAGATTAGAGACAATACTAAAGCCGAACACCTTCAGAGCTGTTATACGCATCCGAAGGTAAGAAGTTCAACCGCGAAAGTGGCTTTATAGCCCCTGAACCCACGAAAGCTGAGAAA	13	5	10	0	3	3	1	0	0	2	3	0	4	0	2	3	3	6	1	6	12	6	8	6	5	0	1	7	8	13	0	10	5	7	7	18	11	3
OTU_904	Chordata	Actinopteri	Perciformes	Percidae			94.643	Midori2	GCGGTTATACGAGAGGCCCAAGTTGATAGACATCGGCGTAAAGCGTGGTTAAGGAAAGTATTAACAATAAAGCCGAACACCTTCAGAGCTGTTATACGCATCCGAAGGTAAGAAGTTCAACCACGAAAGTGGCTTTATAGCCCCTGAACCCACGAAAGCTACGATA	0	0	0	0	0	0	0	0	0	0	0	0	0	0	0	0	0	0	0	0	0	2	0	0	0	0	0	0	0	4	0	0	0	0	3	9	0	0
OTU_906	Chordata	Actinopteri	Cypriniformes	Cyprinidae	Barbus	Barbus barbus	99.265	Midori2	GCGGTCACACGATTAACCCAAGTCAATAGAAGCCGGCGTAAAGAGTGGTTAGGGATAAATAATAATAAAGCCAAATGGCCCCTTGGCCGTCATACGCTTCTAGGTGTCCGAGGCCCTATATACGAAAGTAGCTTTAATTGACCCGCCTGACCCCACGAAAACTGAGAAA	0	6	0	0	0	0	0	0	0	0	0	0	0	0	0	0	0	0	0	0	0	0	0	0	0	0	0	0	0	0	0	0	0	0	0	0	0	0
OTU_914	Chordata	Actinopteri	Cypriniformes	Cyprinidae	Cyprinus	Cyprinus carpio	100	manual check	GCGGTTAGACGAGAGGCCCTAGTTGATATTACAACGGCGTAAAGGGTGGTTAAGGATAAACAAAAATAAAGTCAAATGGCCCCTTGGCCGTCATACGCTTCTAGGAGTCCGAAGCCCTAATACGAAAGTAACTTTAATAAACCCACCTGACCCCACGAAAGCCAGGGCC	0	61	180	111	171	207	144	123	151	105	167	375	223	164	239	295	247	230	229	81	109	75	103	0	135	71	88	26	80	173	136	182	61	86	165	200	118	86
OTU_919	Chordata	Actinopteri	Perciformes	Percidae	Sander		96.97	Midori2	GCGGTTATACGAGAGGCCCTAGTTGATAATTGTCGGCGTAAAGCGTGGTTAAGACAAAAACAAAACTAAAGCCGAACACCTTCAGAGCTGTTATACGCACCCGAAGGTAAGAAGTTCAACCACGAAAGTGGCTTTATTACCCCTGAACCCACGAAAGCTACGATA	0	0	0	0	0	3	0	0	0	0	0	0	0	0	0	0	0	0	0	0	2	4	0	0	3	0	3	4	1	3	0	10	3	2	0	8	5	4
OTU_920	Chordata	Actinopteri	Perciformes	Percidae	Perca		96.988	Midori2	GCTGTTATACGAGAGGCCCAGGTTGATAGACATCGGCGTAAAGCGTGGTTAAGATTAATACAATACTAAAGCCGAACACCTTCAGAGCTGTTATACGCATCCGAAGGTAAGGAGTTCAACCACGAAAGTGGCTTTATAGCCCCTGAACCCACGAAAGCTACGATA	0	0	0	0	1	3	0	2	0	3	3	0	2	1	2	0	0	1	3	3	3	3	0	0	3	8	1	1	3	4	0	6	0	0	4	3	1	4
OTU_921	Chordata	Actinopteri	Perciformes	Percidae	Perca	Perca fluviatilis	98.125	Midori2	GCGGTTATACGATAGGCCCAAGTTGATAGACATCGGCGTAAGGCGTGGTTAAGATTAAAGACAATACTAAAGCCGAACACCTTCAGAGCTGTTATACACATCCGAAGGTAAGAAGTTCAACCACGAAAGTGGCTTTATAGCCCCTGAACCCACGAAAGCTGAGGAA	0	0	0	0	0	0	0	0	0	0	0	0	0	0	0	1	1	0	1	5	5	4	1	0	0	0	1	2	1	0	0	2	3	0	0	5	1	0
OTU_922	Chordata	Actinopteri	Cypriniformes	Leuciscidae	Leuciscus		95.181	Midori2	GCGGTTAAACGAGAGGCCCTAGTTAATAATACACGGCGTAAAGGGTGGTTAAGGAGAGCATAGCAATAAAGCCGAATGGCCCTTTGGCTGTCATACGCTTCTAGGAGTCCGAAGCCCTAATAATAAAAGTAACTTTAATAAACCCACCTGACCCCACGAAAGCTACGATA	0	0	0	0	0	0	0	0	0	0	0	0	0	0	0	0	0	0	0	0	0	3	0	0	0	0	0	1	3	0	0	0	0	0	5	4	3	0
OTU_924	Chordata	Actinopteri	Cypriniformes	Leuciscidae	Leuciscus	Leuciscus aspius	98.246	Midori2	GCGGTTAAACGAGAAGCCCTAGTTAATAATACACGGCGTAAAGGGTGGTTAAGGAAACATAACAATAAAGTCGAATGGCCCCTTGTCTGTCATACGCTTCTAGGTGTCCGAAGCCCAATATACGAAAGTAGCTTTAATAAGGCCCACCTGACCCCACGAAAGCTGAGGAA	0	0	8	0	0	0	0	5	0	0	0	0	0	0	3	0	9	0	2	0	0	0	0	0	4	0	4	2	0	0	0	0	0	2	0	1	1	0
OTU_925	Chordata	Actinopteri	Perciformes	Percidae	Sander		96.97	Midori2	GCGGTGATACGAGAGGCCCAAGTTGATAGACGTCGGCGTAAAGCGTGGTTAAGACAAAAACAAAACTAAAGCCGAACACCTTCAGAGCTGTTATACGCACCCGAAGGTAAGAAGTTCAACCACGAAAGTGGCTTTATTACCCTTGAACCCACGAAATCTGCGATA	0	2	7	14	11	6	7	40	15	25	6	4	13	3	16	9	10	21	11	0	0	0	0	0	0	0	0	0	0	0	0	0	0	0	0	0	0	0
OTU_926	Chordata	Actinopteri	Cypriniformes	Leuciscidae	Abramis	Abramis brama	98.649	Midori2	CTGTAAATTCGTGCCAGCTACCGCGGTTAAACGAGAGGCCCCAGTTAATAATACACGGCGTAAAGGGTGGTTAAGGAAAGTATTAACAATAAAGCCGAATGGCCCTTTGGCTGTCATACGCTTCTAGGTGTCCGAAGTTCAACATACGAAAGCTGAGAAA	0	0	0	2	2	0	0	0	0	0	0	1	0	0	0	0	0	0	0	10	0	7	0	0	0	0	0	0	0	0	0	0	0	1	0	0	0	0
OTU_928	Chordata	Actinopteri	Cypriniformes	Cyprinidae			94.737	Midori2	GCGGTTAGACGAGAGGCCCTAGTTGATATTATAACGGCGTAAAGGGTGGTTAGGGATAAATAATAATAAAGCCAAATTGCCCCTTGCCGTCATACGCTTCTAGGTGTCCGACCCCTATATACGAAAGTAGCTTTAATAACGCCCACCTGACCCCACGAAAGCTGAGAAA	0	3	3	1	3	1	1	0	0	0	0	0	0	0	0	3	0	0	0	14	7	5	5	0	11	0	14	20	0	2	0	204	0	9	5	4	6	0
OTU_929	Chordata	Actinopteri	Perciformes	Percidae	Perca		95.092	Midori2	GCGGTTATACGAGGGGCTCAAATTGATAGACATCGGCTAAAGCGTGGTTAAGATTAAAGACAATACTAAAGCCGAACACCTTCAGAGCTGTTATACGCATCCGAAGGTAAGAAGTTCAACCACGAAAGTGGCTTTATCTAACCTGAACCCACGAAAGCTACGGCA	0	5	0	1	0	0	0	3	5	0	0	0	0	0	0	3	3	1	0	4	21	9	8	0	9	2	7	14	6	12	0	10	9	7	33	13	2	5
OTU_932	Chordata	Actinopteri	Cypriniformes	Leuciscidae	Leuciscus		96.403	Midori2	GCGGTTAAACGAGAGGCCCCAGTTAATAATACACGGCGTAAAGGGTGGTTAAGGAAGGCACAATAATAAAGCCAAATGGCCCTTTGGCTGTCATACGCTTCTAGGTGTCCGAAGTTCAACATACGAAAGTAGCTTTAATTTTCATGAAGCCACGAAAGCTAGGAAA	3	0	0	9	0	6	7	2	3	2	0	1	1	3	1	6	3	4	5	11	17	10	16	0	10	5	16	27	1	13	0	7	21	4	14	29	11	11
OTU_933	Chordata	Actinopteri	Gobiiformes	Gobiidae	Neogobius		95.181	Midori2	GCGGTTATACGAGAGGCCCAAGTTGATAGACATCGGCGTAAAGCGTGGTTAATGATATCACCTCCACTAAAGCCAAACACCTTCAAGGCTGTAGTACGCCCCCGAAGACAGGAAGCCCAATCACGAAAGTAGCTTTAATTTCCATGAAGCCACGAAGGCTAGGAAA	0	15	17	9	6	5	6	14	6	14	4	4	14	2	5	17	12	15	7	15	28	23	26	5	16	15	20	18	23	22	0	24	17	10	42	32	31	27
OTU_937	Chordata	Actinopteri	Gobiiformes	Gobiidae			92.169	Midori2	GCGGTCACACGATTAACCCAAGTCAATAGAAGCCGGCGTAAAGCGTGGTTAGTGATATCACCTCCACTAAAGCCAAACACCTTCAAGGCTGTAATACGCCCCCGAAGACAGGAAGCCCAATCACGAAAGTAGCTTTAATTTTCATGAAGCCACGAAAGCTAGGAAA	0	5	4	0	0	0	0	0	0	0	0	0	0	0	0	0	1	0	1	0	0	0	0	0	0	0	0	0	0	0	0	0	0	0	0	0	0	0
OTU_942	Chordata	Actinopteri	Gobiiformes	Gobiidae			94.245	Midori2	GCGGTTATACGAGAGGCCCAAGTTGACAAAAATCGGCGAAAAGCGTGGTTAGTGATATCACCTCCACTAAAGCCAAACACCTTTAAGGCTGTTATACGCCCCCAAAGGTAGGAAGACCCCTCACGAAAGTAGCTTTAATACCTTTGAACTCACGACAGTTGAGGAA	0	0	0	0	0	0	0	0	0	0	0	0	0	0	0	0	0	0	0	3	0	0	0	0	0	0	0	0	0	0	0	0	0	0	0	0	0	1
OTU_944	Chordata	Actinopteri	Gobiiformes	Gobiidae	Neogobius		96.988	Midori2	GCGGTTATACGAGAGGCCCAAGTTGACAAAAATCGGCGAAAAGCGTGGTTATATATCACCTCCACTAAAGCCAAACACCTTCGAGGCTGTAATACGCCCCCGAAGACAGGAAGCCCAATCACGAAAGTAGCTTTAATCTTCATGAAGCCACGAAAGCTAGGAAA	21	6	5	4	2	4	5	2	2	3	1	0	0	1	2	7	6	1	2	12	2	2	0	5	1	0	4	1	2	5	0	3	6	8	3	7	3	0
OTU_945	Chordata	Actinopteri	Cypriniformes	Leuciscidae	Leuciscus		95.906	Midori2	GCGGTCATACGATTAACCCTAATTAATAATACACGGCGTAAAGGGTGGTTAAGGAAAGCATAACAATAAAGCCGAATGGCCCTTTGGCTGTCATACGCTTCTAGGTGTCCGAAGCCCAATATACGAAAGTAGCTTTAATAAAGCCCACCTGACCCCACGAAAGCTGAGAAA	0	0	0	0	0	2	0	0	2	0	0	0	0	2	0	0	0	0	0	0	6	0	0	0	1	0	3	2	0	0	0	5	0	0	0	0	0	0
OTU_951	Chordata	Actinopteri	Perciformes	Percidae			93.333	Midori2	GCGGTCACACGATTAACCCAAGTCAATAGAAGCCGGCGTAAAGCGTGGTTAAGACAAAAACAAAACTAAAGCCGAACACCTTCAGAGCTGTTATACGCACCCGAAGGTAAGAAGTTCAACCACGAAAGTGGCTTTATTACCCCTGAACCCACGAAAGCTACGATA	0	0	0	0	0	0	0	0	0	0	0	0	0	0	0	0	0	0	3	0	0	0	0	0	0	0	0	0	0	0	0	0	0	3	0	0	0	0
OTU_953	Chordata	Actinopteri	Perciformes	Percidae	Perca		96.386	Midori2	GCGGTTATACGAGAGGCCCAAGTTGATAGACATCGGCGTAAAGCGTGGTTAAGATTAAAGACAATACTAAAGCCGAACACCTTCAGAGCTGTTATACGCATCCGAAGACAGGAAGCCCAATCACGAAAGTGGCTTTATAGCCCCTGAACCCACGAAAGCTACGATA	0	0	0	0	0	0	0	0	0	0	0	0	0	0	0	0	0	0	0	3	9	7	5	0	2	1	6	5	9	5	0	7	4	2	4	17	9	5
OTU_956	Chordata	Actinopteri	Cypriniformes	Leuciscidae	Squalius	Squalius cephalus	97.576	Midori2	GCGGTTAAACGAGAGGCCCTAGTTAATAATACGCGGCGTAAAGGGTGGTTAAGGAAAACATAACAATAAAGCCGAATGGCCCTTTGGCTGTCATACGCTTCTAGGTGTCCGGAGCCCAATATACGAAAGTAGCCTTAATAAAGTCCACCTGACCCCACGAAAGCTACGGCA	0	17	4	7	15	7	4	15	16	9	5	6	4	11	11	13	6	6	14	9	15	0	13	0	13	2	10	11	8	26	0	10	0	7	23	14	15	6
OTU_957	Chordata	Aves	Columbiformes	Columbidae	Columba		96.61	Midori2	GCGGTTATACGAGAGGCCCAAGCTAATCGTTCACGGCGTAAAGAGTGGACTCATGCTTATCACATTAATTAAGGTCAAAACGCAGCTGAGCTGTCATAAGCTTAAGGTGCACTTAAAACCGCCCTAAATACGACCCTAAACTCATACGACTCAATGAACTCCACGAAAGCCAGGGTA	0	0	0	0	0	0	0	0	0	0	3	0	0	0	0	0	0	0	0	0	0	0	0	0	0	0	0	0	1	2	0	0	0	0	0	0	2	0
OTU_958	Chordata	Actinopteri	Cypriniformes	Leuciscidae	Leuciscus	Leuciscus leuciscus/idus	99.39	manual check	GCGGTTAAACGAGAGGCCCTAGTTAATAATACACGGCGTAAAGGGTGGTTAAAGAAAGCATAACAATAAAGCCGAATGGCCCTTTGGCTGTCATACGCTTCTAGGTGTCCGAAGCCCAATATACGAAAGTAGCTTTAATAAAGCCCACCTGACCCCACGAAAGCCAGGGCC	2	0	0	1	0	0	3	0	0	0	2	0	0	4	0	0	2	1	0	0	0	0	0	0	0	0	0	0	0	3	0	8	0	0	0	0	10	3
OTU_961	Chordata	Mammalia	Rodentia	Myocastoridae	Myocastor	Myocastor coypus	97.561	Midori2	GCGGTCATACGATTAACCCTGATTAATAAACCCCGGCGTAAAGAGTATTAAAGATACAATAAAAATAAGATTAAATTTCATCTGGGTCGTAAAAAACTATAGATAAAAATAGAATCGATAACGAAGGTAATCTTGATATATCAGAGTACACTAAAGCTAAGACA	0	190	0	0	0	0	0	0	0	0	0	0	0	0	0	0	0	0	0	0	0	0	0	0	0	0	0	0	0	0	0	0	0	0	0	0	0	0
OTU_964	Chordata	Mammalia	Rodentia	Cricetidae	Microtus	Microtus arvalis	98.113	Midori2	GCGGTCATACGGTTAACCCAAACTAATTATTCTCGGCGTAAAACGTGTTACTAGAAATATGCAAAATAGGATTAAAATCCATCCAATATGTGAAAACTCATCGCTGGACCTAAAACCAATGACGAAAGTAATTCTAATAAGCCTGATACACGATAGCTAGGAAA	0	0	0	0	0	0	0	0	0	0	0	0	0	0	0	0	0	0	0	0	0	0	0	0	0	0	0	0	0	0	0	0	4	0	0	0	0	0
OTU_965	Chordata	Actinopteri	Cypriniformes	Leuciscidae	Leuciscus	Leuciscus leuciscus	97.076	Midori2	GCGGTTAAACGAGAGGCCCTAGTTAATAATACACGGCGTAAAGGGTGGTTAAGGAGAGCATAATAATAAAGCCGAATGGCCCTTTGGCTGTCATACGCTTCTAGGTGTCTGAAGCCCAATATACAAAAGTAGCTTTAATAAAGCCCACCTGACCCCACGAAAGCTAGGAAA	1	0	0	0	0	3	0	0	0	0	1	0	0	0	0	1	1	0	0	0	0	0	0	0	0	0	0	0	0	0	0	350	0	0	3	3	3	2
OTU_967	Chordata	Mammalia	Rodentia	Cricetidae	Microtus	Microtus arvalis	98.758	Midori2	GCGGTCATACGATTAACCCAAACTAATTATTCTCGGCGTAAAACGTGTTACTAGAAATACGCAAAATAGAATTAAAATCCATCCAATATGTGAAAATTCATCGCTGGACCTAAAACCAATGACGAAAGTAATTCTAATAAGCCTGATACACAATAGCTAAGACC	0	0	0	0	0	0	0	0	0	0	0	0	0	4	0	0	0	0	0	0	0	0	0	0	0	0	0	0	0	0	0	0	3	19	0	0	0	0
OTU_968	Chordata	Actinopteri	Cypriniformes	Leuciscidae	Rutilus	Rutilus rutilus	100	Midori2	GCGGTCATACGATTAACCCAAGCTAACAGGAGTACGGCGTAAAGGGTGGTTAAGGGAAGCACAATAATAAAGCCAAATGGCCCTTTGGCTGTCATACGCTTCTAGGTGTCCGAAGCCCAATATACGAAAGTAGCTTTAATAAAGCCCACCTGACCCCACGAAAGCTGAGAAA	3	0	0	0	0	0	0	0	0	0	0	0	2	0	0	0	0	0	0	0	0	0	0	0	0	0	0	0	0	0	0	0	0	0	0	0	0	0
OTU_969	Chordata	Actinopteri	Perciformes	Percidae	Perca		96.988	Midori2	GCGGTTATACGAGAGGCCCAAGTTGATAGACATCTGCGTAAAGCGTGGTTAAGATTAAAGACAATACTAAAGCCGAACACCTTCAGAGCTTTTATACGCTCCGAAGGTAAGAAGTTCAACCACGAAAGTGGCTTTATTACCCCTGAACCCACGAAAGCTACGATA	0	0	0	0	0	0	0	0	0	0	0	0	0	0	0	0	0	0	0	0	0	0	0	0	1	0	0	2	0	0	0	3	1	2	0	155	0	0
OTU_970	Chordata	Actinopteri	Cypriniformes	Leuciscidae	Abramis		96.512	Midori2	GCGGTTAAACGAGAGGCCCCAGTTAATAATACACGGCGTAAAGAGTGGTTAAGGAAAGTATTAACAGTAAAGCCGAATGGCCCTTTGGCTGTCATACGCTTCTAGGTGTCCGAAGTTCATACGAAAGTAGCTTTAACAACGCCCACCTGACCCCACGAAAGCTGAGAAA	0	4	0	0	0	0	0	1	0	0	0	1	0	0	0	0	0	0	0	0	0	2	0	0	0	0	0	0	0	53	0	0	0	0	0	0	0	0
OTU_971	Chordata	Actinopteri	Perciformes	Gasterosteidae			92.593	Midori2	GCGGTTAGGCGAGAGGCCCTAGTTGATGAGTTACGGCGTAAAGAGTGGTTAAGCTAAAATTAAAACTAAAGCCGAACACCCCCAAAGCTGTTATACGCATCCGAAGGTAAGAAGTTCAACCACGAAAGTGGCTTTATAGCCCCTGAGCCCACGAAAGCTACGATA	0	3	0	0	0	0	3	0	3	1	2	0	0	0	0	12	3	2	1	3	18	5	5	0	5	1	5	11	3	7	0	8	2	2	10	9	5	1
OTU_972	Chordata	Actinopteri	Cypriniformes	Cyprinidae			94.286	Midori2	GCGGTTAGACGAGAGGCCCTAGTTGATATTATAACGGCGTAAAGGGTGGTTAGGGATAAATAATAATAAAGCCGAATGGCCCTTTGGCTGTCATACGCTTCTAGGTGTCCGAAGTTCAACACACGAAAGTAGCTTTAATTTTCATGAAGCCACGAAAGCTAGGAAA	0	0	0	0	0	0	0	0	0	0	0	0	0	0	0	1	0	0	0	0	3	2	0	0	1	0	0	0	0	3	0	0	0	0	0	0	0	0
OTU_974	Chordata	Mammalia	Rodentia	Cricetidae	Microtus		96.855	Midori2	GCGGTCATACGATTAACCCAAACTAATTATTCTCGGCGTAAAACGTGTTACTAGAAATATGCAAAATAGAATTAAAATCCATCCAATAAAAAATTCATCGCTGGACCTAAAACCAATGACGAAAGTAATTCTAATAAGCCTGATACACGAAAGCTAGGAAA	0	0	0	0	0	0	0	0	0	0	0	0	0	0	0	0	0	0	0	0	0	0	0	0	0	0	0	0	0	0	0	0	10	1	0	0	0	0
OTU_975	Chordata	Actinopteri	Cypriniformes	Leuciscidae			94.22	Midori2	GCGGTTAGACGAGAGGCCCTAGTTGATATTACAACGGCGTAAAGGGTGGTTAAGGAGAGCATAACAATAAAGCCGAATGGCCCTTTTGGCTGTCATACGCTTCTAGGTGTCCGAAGTTCAACATACGAAAGTAGCTTTAATAACGCCCACCTGACCCCACGAAAACTGAGAAA	0	3	1	26	1	28	14	5	5	0	4	2	0	1	4	16	10	15	10	17	32	42	26	0	13	3	15	15	4	32	0	22	26	11	67	88	57	32
OTU_977	Chordata	Actinopteri	Perciformes	Percidae			93.976	Midori2	GCGGTTATACGAGAGGCCCAAGTTGACAAAAATCGGCGAAAAGCGTGGTTAAGCTAAAATTAAAACTAAAGCCGAACACCTTCAGAGCTGTTATACGCATCCGAAGGTAAGAAGTTCAACCACGAAAGTGGCTTTATAGCCCCTGAACCCACGAAAGCTACGATA	0	0	0	0	0	0	0	0	0	0	0	0	0	0	0	0	0	0	0	3	9	4	4	0	2	2	6	6	0	4	0	3	2	5	5	5	0	2
OTU_978	Chordata	Actinopteri	Cypriniformes	Leuciscidae			94.798	Midori2	GCGGTTATACGAGAGGCCCAGTTAATAATACACGGCGTAAAGGGTGGTTAAGGAAAGTATTAACAATAAAGCCGAATGGCCCTTTGGCTGTCATACGCTTCTAGGTGTCCGAAGCCCAACCACACGAAAGTAGCTTTAACAAAGCCCACCTGACCCCGCGAAAGCTGAGAAA	0	0	0	0	0	0	0	0	0	0	0	0	0	0	0	0	0	0	0	0	7	0	0	0	5	4	1	4	0	5	0	1	0	19	10	14	3	0
OTU_979	Chordata	Actinopteri	Gobiiformes	Gobiidae			94.012	Midori2	GCGGTTATACGAGAGGCCCGAGTTGACAAACATTCGGCGTAAAGCGTGGTTAGTGATATCACCTCCACTAAAGCCAAACACCTTCAAGGCTGTAATACGCCCCCGAAGACAGGAAGCCCAATCACGAAAGTAGCTTTAATTACTATGAACCCACGAAAGCTGAGAAA	0	0	0	0	0	0	0	0	0	0	0	0	0	0	0	0	0	0	0	0	0	0	0	0	0	0	0	0	0	2	0	0	0	1	4	0	0	0
OTU_981	Chordata	Actinopteri	Cypriniformes	Leuciscidae	Rutilus	Rutilus rutilus	97.076	Midori2	GCGGTTAAACAAGAGGCCCTAGTTAATAATACACGGCGTGAAGGGTGGTTAAGGGAAGCACAATAATAAAGCCAAATGGCTTTGGCTGTCATACGCTTCTAGGTGTCCGAAGCCCAATATACGAGAGTAGCTTTAATAAAGCCCACCTGACCCCACGAAAGCTGAGAAA	0	0	2	0	0	0	0	0	0	0	0	0	0	0	0	0	0	0	0	0	0	0	0	0	0	0	0	0	0	0	0	0	0	0	0	0	0	0
OTU_982	Chordata	Actinopteri	Cypriniformes				95.266	Midori2	GCGTTTAAACGAGAGGCCCCAGTTAATAATACACGGCGTAAAGGGTGGTTAAGGATAAACAAAAATAAAGTCAAATGGCCCCTTGGCCGTCATACGCTTCTAGGAGTCCGAAGCCCTAATACGAAAGTAACTTCAATAAACCCACCTGACCCCACAAAAGCTGAGAAA	0	0	4	1	2	17	0	2	2	0	1	1	1	3	0	13	2	4	5	12	4	15	6	0	16	0	5	0	1	4	0	17	5	0	12	9	4	6
OTU_984	Chordata	Actinopteri	Cypriniformes	Leuciscidae			93.023	Midori2	GCGGTTATACGAGAGGCCCAAGTTGATAGACATCGGCGTAAAGGGTGGCTAAGGGAAGCACAATAATAAAGCCGAATGGCCCTTTGGCTGTCATACGCTTCTAGGTGTCCGAAGTTCAACATACGAAAGTAGCTTTAATAACGCCCACCTGACCCCACGAAAGCTGAGAAA	0	0	1	1	0	3	6	1	2	1	3	0	0	4	0	3	2	1	4	19	25	27	8	0	4	4	19	22	12	17	0	19	17	22	38	39	37	25
OTU_990	Chordata	Actinopteri	Cypriniformes	Leuciscidae	Rutilus	Rutilus rutilus	97.661	Midori2	GCGGTTAAACGAGAGGCCCTAGTTAATAATACACGGCGTAAAGGGTGGTTAAGGGAAGCACAATAATAAAGCCGAATGGCCCTTTGGCTGTCATACGCTTCTAGGTGTCCGAAGCCCAATATATGAAAGTAGCTTTAATAACGCCCACCTGACCCCACAAAAGCTGAGAAA	5	0	3	0	0	0	3	5	4	2	1	1	0	4	2	6	2	1	2	5	0	4	11	0	5	2	7	0	10	10	0	5	12	11	2	14	6	11
OTU_991	Chordata	Actinopteri	Perciformes	Percidae			93.865	Midori2	GCGGTTATACGAGAGGCCCAAGTTGATAGACATCGGCGTAAAGCGTGGTTAAGATTAAAGGCAATACTAAAGCCGGACACCTTCAGGGCTGTTATACGCATCCGGAGGTGAGAAGTTCAACCACGAAGGTGGCTTTATCTAACCTGAACCCACGAAAGCTACGGCA	0	357	111	219	199	144	160	303	340	118	179	95	64	88	82	277	210	102	252	664	2487	1112	1261	33	710	366	1117	2276	402	1506	200	1052	470	605	1942	2053	811	541
OTU_994	Chordata	Actinopteri	Cypriniformes	Leuciscidae	Leuciscus		96.512	Midori2	GCGGTTAAACGAGAGGCCCCAGTTAATAATACACGGCGTAAAGGGTGGTTAATGAAAGTATTAACAATAAAGCCGAATGGCCCTTTGGCTTCATACTCTTCTAGGTGTCCGAAGCCCAATATACGAAAGTAGCTTTAATAAAGCCCACCTGACCCCACGAAAGCTGAGAAA	0	0	0	0	0	0	0	0	0	0	0	0	0	0	0	0	0	0	0	6	0	0	0	0	0	0	0	2	2	0	0	0	1	4	2	8	0	0
OTU_995	Chordata	Actinopteri	Cypriniformes				92.982	Midori2	GCGGCTATACGAGAGGCCCAAGTTGATATTACAACGGCGTAAAGGGTGGTTAAGGATAAACAAAAATAAAGTCAAATGGCCCCTTGGCCGTCATACGCTTCTAGGAGTCCGAAGTTCAACATACGAAAGTAGCTTTAATAACGCCCACCTGACCCCACGAAAGCTAGGAAA	0	24	66	34	47	104	96	65	40	34	62	67	70	69	62	123	100	93	117	162	135	225	157	0	111	10	109	73	45	223	22	179	105	107	290	306	165	127
OTU_997	Chordata	Actinopteri	Cypriniformes	Cyprinidae	Barbus		95	Midori2	GCGGTTATACGAGAGGCCCAAGTTGATATTATAACGGCGTAAAGGGTGGTTAGGGATAAATAATAATGAAGCCAAATGGCCCCTTGGCCGTCATACGCTTCTAGGCGTCCGAGGCCCAATCACGAAAGTAGCTTTAATTTTCATGAAGCCACGAAAGCTAGGAAA	0	6	2	0	0	0	0	0	0	0	0	0	0	0	0	0	0	0	0	0	4	0	0	0	0	1	0	0	0	2	0	0	0	0	0	0	0	0
OTU_998	Chordata	Actinopteri	Gobiiformes	Gobiidae			93.939	Midori2	GCGGTTATACGAGAGGCCCAAGTTGACAAAGATCGGCGTAAAGCGTGGTTAATGATAATTCCACTAAAGCCAAACACCTTCAAGGCTGTTATACGCCCCCGAAGACAGGAAGACCCATCACGAAAGTAGCTTTAACACCTTTGAACTCACGACAGTTGAGGAA	0	0	0	0	0	0	0	0	0	0	0	0	0	0	0	0	0	0	0	0	2	0	2	0	0	1	2	0	0	0	0	0	5	0	0	0	0	0
OTU_1001	Chordata	Actinopteri	Cypriniformes	Leuciscidae			94.186	Midori2	GCGGTTAAACGAGAGGCCCTAGTTAATAATACACGGCGTAAAGGGTGGTTAAGGAAAGTATTAACAATAAAGCCGAATGGCCCTTTGGCTGTCATACGCTTCTAGGTGTCCGAAGCCCTAATACGATAGTAACTTTAATGAACCCACCTGTCCCCACGAAAGCTGAGGAA	0	34	34	4	2	12	10	23	2	8	3	19	8	8	9	30	7	7	6	18	17	33	39	0	19	2	15	48	16	14	0	19	5	19	102	51	29	17
OTU_1002	Chordata	Actinopteri	Gobiiformes	Gobiidae			94.012	Midori2	GCGGTTATACGAGAGGCCCAAGTTGACAAAAATCGGCGAAAAGCGTGGTTAGTGATATCACCTCCACTAAAGCCAAACACCTTCAAGGCTGTCATACGCTTCTAGGTGTCCGAAGCCCAATCACGAAAGTAGCTTTAATTTTCATGAAGCCACGAAAGCTAGGAAA	0	0	0	0	0	0	0	0	0	0	0	0	0	0	0	0	0	0	0	0	0	2	0	0	1	0	0	3	0	0	0	2	0	0	0	4	0	2
OTU_1003	Chordata	Actinopteri	Gobiiformes	Gobiidae	Ponticola		96.951	Midori2	GCGGTTATACGAGAGGCCCGAGTTGACAAACATTCGGCGTAAAGCGTGGTTAATAACTTGTTTACTAAAGCCAAACACCTTTAAGGCTGTTATACGCCCCCAAAGGTAGGAAGACCCCTCACGAAAGTAGCTTTAATTACTATGACCCCACGAAAGCTGAGAAA	0	8	0	0	0	0	1	4	3	0	1	1	0	4	2	4	0	1	0	0	3	2	5	0	0	0	0	0	1	6	0	0	0	3	0	0	0	2
OTU_1004	Chordata	Actinopteri	Perciformes	Percidae	Perca	Perca fluviatilis	97.5	Midori2	GCGGTTATACGAGAGGCCCAAGTTGATAGACATCGGCGTAAAGCGTGGTTAAGATTAAAGACAATACTAAAGCCGAACACCTTCAGAGCTGTTATACGCATCCGGAGGTAAGAAGTTCAACCAAAAGTGGCTTTATAGCCCCTGAACCCACGAGAGCTGAGAAA	0	0	0	0	0	0	0	0	0	0	0	0	0	0	0	0	0	0	0	4	0	0	0	0	0	0	0	0	0	3	0	0	2	0	0	10	0	0
OTU_1005	Chordata	Actinopteri	Perciformes	Percidae	Perca	Perca fluviatilis	98.125	Midori2	GCGGTTATACGATAGGCCCAAGTTGATAGACATCGGCGTAAAGCGTGGTTAAGATTAAAGACAATACTAAAGCCGAACACCTTCAGAGCTGTTATACGCATCCGAAGGTAAGAAGTTCAACCACGAAAGTGGCTTTATTACCCCTGAACCCACGAAAGCTGATA	0	0	0	0	0	0	0	0	0	3	0	0	0	0	0	0	0	1	0	4	3	15	4	0	2	2	18	4	0	6	0	9	6	19	38	13	24	4
OTU_1006	Chordata	Actinopteri	Gobiiformes	Gobiidae	Neogobius		96.988	Midori2	GCGGTTAAACGAGAGGCCCTAGTTGACAAAAATCGGCGAAAAGCGTGGTTAGTGATATCACCTCCACTAAAGCCAAACACCTTCAAGGCCGTAATACGCCCCCGAAGACAGGAAGCTCAATCACGAAGGTAGCTTTAATTTTCATGAAGCCACGAAAGCTAGGAAA	2	0	7	0	2	2	4	4	3	1	0	2	0	2	3	6	2	0	1	2	3	0	0	0	2	0	6	0	3	8	0	0	2	2	10	7	1	3
OTU_1010	Chordata	Actinopteri	Perciformes	Percidae	Sander		96.364	Midori2	GCGGTTATACGAGAGGCCCAAGTTGATAGACATCGGCGTAAAGCGTGGTTAAGACAAAAACAAAACTAAAGCCGAACACCTTCAGAGCTGTTATACGCATCCGGAGGTGAGAAGTTCAACCACGAAGGTGGCTTTATAGCCCCTGAACCCACGAAAGCTACGATA	0	0	0	0	0	0	0	0	0	0	0	0	0	0	0	0	0	0	0	2	6	8	2	0	2	1	6	10	0	11	0	3	6	3	23	18	13	3
OTU_1011	Chordata	Actinopteri	Gobiiformes	Gobiidae	Neogobius		95.783	Midori2	GCGGTTATACGAGAGGCCCAAGTTGATAGACATCGGCGAAAAGCGTGGTTAGTGATATCACCTCCACTAAAGCCAAACACCCTCAAGGCTGTAATACCCCCCGAAGACGAAGCCCAATCACGAAAGTAGCTTTAATTTTCATGAAGCCACGAAAGCTAGGAAA	1	1	1	3	0	2	1	6	0	0	2	0	0	1	1	5	3	5	3	12	24	8	12	0	7	11	16	12	11	14	0	14	6	11	19	20	15	15
OTU_1012	Chordata	Actinopteri	Gobiiformes	Gobiidae	Neogobius		96.988	Midori2	GCGGTTATACTGGAGGCCCAAGTTGACAAAAATCGGCGAAAAGCGTGGTTAGTGATATCACCTCCACTAAAGCCAAACACCTTCAAGGCTGTAATACGCCCCCGAAGACAGGATCCCAATCACGAAAGTAGCTTTAATTTTCATGAAGCCACAAAAGCTAGGAAA	0	0	0	0	0	0	0	0	0	0	1	0	0	0	0	0	0	0	0	0	0	0	0	0	0	0	0	0	0	511	0	0	0	1	0	0	0	0
OTU_1013	Chordata	Actinopteri	Cypriniformes	Leuciscidae			91.228	Midori2	GCGGTTAAACGAGAGGCCCTAGTTAATAATACACGGCGTAAAGGGTGGTTAAGGAAAGCATAACAATAAAGCCGAATGGCCCTTTGGCTGTTATACGCTTCTAGGTGTCCGAAGTTCAACATACGAAAGTAGCTTTAATCTTCATGAACCCACGAAAGCTAGGAAA	0	0	3	6	0	5	5	0	0	0	0	3	0	1	1	1	2	0	4	10	30	10	7	0	3	0	7	7	2	7	0	8	19	5	14	18	8	9
OTU_1015	Chordata	Actinopteri	Cypriniformes	Leuciscidae	Abramis	Abramis brama	98.193	Midori2	GCGGTTAAACGAGAGGCCCCAGTTAGTAATACACGGCGTAAAGGGTGGTTAAGGAAAGTATTAACAATAAAGCCGAATGGCCCTTTGGCTGTCATACGCTTCTAGGTGTCCGAAGTTCAACATACGAAAGTAGCTTTAATAACGCCAACCTGAACCCACGAAAGCTACGGCA	7	4	4	2	1	3	2	1	10	6	4	5	1	0	1	4	2	4	4	0	7	11	9	0	9	6	7	15	0	12	5	5	3	10	4	7	8	6
OTU_1017	Chordata	Actinopteri	Cypriniformes	Cyprinidae			90.116	Midori2	GCGGTTATACGAGAGGCCCAAGTTGACAAAAATCGGCGAAAAGCGTGGTTAAGGAAAGTATTAACAATAAAGCCGAATGGCCCTTTGGCCGTCATACGCTTCTAGGTGTCCGAGGCCCTATATACGAAAGTAGCTTTAATTAACCCGCCTGACCCCACGAAAACTGAGAAA	0	0	0	0	0	0	0	0	0	0	0	0	0	0	0	0	0	0	0	0	1	0	1	0	0	0	0	0	0	0	0	1	0	0	0	0	0	0
OTU_1019	Chordata	Actinopteri	Perciformes				86.826	Midori2	GCGGTTAAACGAGAGGCCCTAGTTAATAATACACGGCGTAAGGGGTGGTTAGTGATATCACCTCCACTAAAGCCAAACACCTTCAGGGCTGTAATACGCATCCGAAGGTAAGAAGTTCAACCACGAAAGTGGCTTTATAGCCCCTGAACCCACGAAAGCTACGATA	0	0	0	0	0	0	0	0	0	0	0	0	0	0	0	0	0	0	0	0	0	0	0	0	0	0	0	0	0	0	0	0	1	2	2	0	0	0
OTU_1020	Chordata	Actinopteri	Gobiiformes	Gobiidae	Neogobius		96.407	Midori2	GCGGCTATACGAGAGGCCCGAGTTGACAAACATTCGGCGTAAAGCGTGGTTAATGATATCACCTCCACTAAAGCCAAACACCTTCAAGGCTGTAATACGCCCCCGAAGACAGGAAGCCCAATCACGAAAGTAGCTTTAATTTTCATGAAGCCACGAAAGCTAGGAAA	0	113	83	32	46	65	53	103	59	44	96	6	44	54	27	76	42	55	84	154	211	214	147	2	124	46	183	111	89	203	1	112	56	262	259	85	120	102
OTU_1023	Chordata	Actinopteri	Perciformes	Percidae	Perca		95.732	Midori2	GCGGTTATACGAGAGGCCCAAGTTGACAAAAATCGGCGAAAAGCGTGGTTAAGATTAAAGACAATACTAAAGCCGAACACCTTCAGAGCTGTTATACGCATCCGAAGGTAAGAAGTTCAACCACGAAAGTGGCTTTATAGCCCATGAAGCCACGAAAGCTAGGAAA	0	10	15	8	4	12	10	12	8	11	4	1	6	7	8	25	16	8	7	96	86	96	46	0	30	29	95	88	35	73	2	107	89	52	112	170	85	76
OTU_1024	Chordata	Actinopteri	Gobiiformes	Gobiidae	Neogobius		95.783	Midori2	GCGGTTATACGAGAGGCCCAAGTTGACAAAAATCGGCGAAAAGCGTGGTTAGTGATATCACCTCCACTAAAGCCAAACACCTTCAAGGCTGTAATACGCCCCCGAAGACAGGAAACCCAATCAAAAGTAGCTTTAATTACTATGAATCCACGAAAGCTAGGAAA	0	0	0	0	0	0	0	0	0	0	0	0	0	0	0	0	0	0	0	0	0	12	0	0	0	0	0	0	0	4	0	4	0	0	7	1	1	0
OTU_1026	Chordata	Actinopteri	Perciformes	Gasterosteidae			91.515	Midori2	GCGGTTATACGAGAGGCCCAAGTTGATAGACATCGGCGTAAAGCGTGGTTAAGACAAAAACAAAACTAAAGCCGAACACCCCCAAAGCTGTTATACGCATCCGGAGGTGAGAAGTTCAACCACGAAGGTGGCTTTATCTAACCCCCCCACGAAAGCTACGGCA	0	0	0	0	0	0	0	0	0	0	0	0	0	0	0	0	0	0	0	0	2	0	2	0	2	0	7	5	0	3	0	4	0	3	4	1	3	1
OTU_1027	Chordata	Actinopteri	Cypriniformes	Leuciscidae	Rutilus	Rutilus rutilus	97.076	Midori2	GCGGTTAAACGAGAGGCCCCAGTTAATAATACACGGCGTAAAGGGTGGTTAAGGGAAGCACAATAATAAAGCCGAATGGCCCTTTGGCTGTCATACGCTTCTAGGTGTCCGAGGCCCAATATACGAAAGTAGCTTTTAATAAAGTCCACCTGACCCCACGAAAGCTGAGAAG	0	0	0	2	0	4	0	0	1	0	0	0	0	6	0	3	0	1	2	8	5	3	8	0	3	0	4	4	0	4	0	8	5	12	3	16	17	8
OTU_1028	Chordata	Mammalia	Primates	Hominidae	Homo	Homo sapiens	98.765	Midori2	GCGGTCACACGATTAACCCAAGTCAATAGAAGCCGGCGTAAAGAGTGTTTTAGATCACCCCCTCCCCAATAGAGCTAAAACTCACCTGAGTTGTAAAAAACTCCAGTTGACACAAAATAGACTACGAAAGTGGCTTTAACATATCTAACACACAATAGCTATACC	0	2	1	0	0	0	0	0	0	0	0	0	0	0	0	0	0	0	0	0	0	0	0	0	0	0	0	0	0	0	0	0	0	0	0	0	0	0
OTU_1029	Chordata	Actinopteri	Perciformes	Percidae	Sander		96.97	Midori2	GCGGTATACGAGAGGCCCAAGTTGACAAAAATCGGCGTAAAGCGTGGTTAGGACAAAAACAAAACTAAAGCCGAACACCTTCAGAGCTGTTATACGCACCCGAAGGTAAGAAGTTCAACCACGAAAGTGGCTTTATTACCCCTGAACCCACGAAAGCTACGATA	0	0	0	1	2	12	4	0	5	2	3	0	6	1	4	2	6	13	3	8	4	17	9	0	6	10	15	7	3	7	0	22	19	13	12	30	24	13
OTU_1030	Chordata	Actinopteri	Gobiiformes	Gobiidae	Neogobius		96.988	Midori2	GCGGTTAAACGAGAGGCCCTAGTTGACAAAAATCGGCGAAAAGCGTGTCTAGTGATATCACCTCCACTAAAGCCAAACACCTTCAAGGCTGTAATACGCCCCCGAAGACAGGGAGCCCAATCACGAAAGTAGCTTTAATTTTCATGAAGCCACGAAAGCTAGGAAA	6	4	7	4	4	11	5	5	4	10	1	4	7	10	4	3	6	6	13	16	6	8	4	0	16	0	8	5	6	14	2	13	11	14	36	30	19	12
OTU_1032	Chordata	Actinopteri	Cypriniformes	Leuciscidae	Rutilus	Rutilus rutilus	97.661	Midori2	GCGGTTAAACGAGAGGCCCTAGTTAATAATACACGGCGTAAAGGGTGGTTAAGGGAAGCACAATAATAAAGCCAAATCGCCCTTTAGCTGTCGTACGCTTCTAGGTGTCCGAAGCCCAATATACGAAAGTAGCTTTAATAAAGCCCACCTGACCCCACGAAAACTGAGAAA	0	0	3	2	0	0	0	0	0	0	0	0	0	0	0	4	0	0	0	2	0	0	0	0	0	0	0	0	0	0	0	0	0	0	0	0	0	0
OTU_1033	Chordata	Actinopteri	Cypriniformes	Leuciscidae	Rutilus	Rutilus rutilus	97.661	Midori2	GCGGTTAAACGAGAGGCCCCAGTTAATAATACATGGCGTAAAGGGTGGTTAAGGGAAGCACAATAATAAAGCCAAATGGCTCTTTGGCTGTCATACGCTTCTAGGTGTCCGAAGCCCAATATACGAAAGTAGCTTTAATAAAGCCCACCTAACCCCACGAAAGCTGAGAAA	0	0	0	0	0	0	3	0	1	2	0	0	0	0	0	4	8	1	0	7	2	5	2	0	4	0	0	2	0	0	2	0	5	3	0	0	4	2
OTU_1034	Chordata	Actinopteri	Gobiiformes	Gobiidae	Neogobius		96.988	Midori2	GCGGTTATACGAGAGGCCCAAGTTGACAAAGATCGGCGAAAAGCGTGGTTAGTGATATCACCTCCACTAAAGCCAAACACCTTCAATGCTGTAATACGCCCCCGAAGACAGGAGGCCCAATCACGAAAGTAGCTTTAATTTTCATGATTCCACGAAAGCTAGGAAA	0	0	0	0	0	0	0	0	0	0	0	0	0	0	1	0	0	0	0	0	0	0	0	0	0	0	131	0	3	0	0	0	0	0	0	4	0	1
OTU_1035	Chordata	Actinopteri	Gobiiformes	Gobiidae	Neogobius		96.988	Midori2	GCGGTTATACGAGAGGCCCAAGTTGACAAAAATCAGCGAAAAGCGTGGTTAGTGATATCACCTCCACTAAAGCCAAACACCTTCATGCTGTAATACGCCCCCGAAGACAGGAAGCCTAATCACGAAATTAGCTTTAATTTTCATGAAGCCACGAAAGCTAGGAAA	0	0	0	0	0	0	0	0	0	1	0	0	0	0	0	0	0	0	0	0	0	1	0	0	0	0	0	1	0	0	0	4	0	0	0	0	3	0
OTU_1036	Chordata	Actinopteri	Cypriniformes	Leuciscidae			94.798	Midori2	GCGGTTATACGAGAGGCCCGAGTTGACAAACATTCGGCGTAAAGGGTGGTTAAGGAGAGCATAACAATAAAGCCAAATGGCCCTTTGGCTGTCATACGCTTCTAGGTGTCCGAAGCCCAATATACGAAAGTAGCTTTAATAAAGCCCACCTGACCCCACGAAAGCTGAGTAA	0	0	0	0	0	3	0	0	4	1	0	0	1	0	1	2	0	2	0	5	4	1	4	0	1	0	6	2	3	5	0	0	0	4	15	3	8	5
OTU_1037	Chordata	Actinopteri	Cypriniformes	Leuciscidae			94.767	Midori2	GCGGTTAAACGAGAGGCCCTAGTTAATAATACACGGCGTAAAGGGTGGTTAGTGATATCACCTCCACTAAAGCCAAATGGCCCTTTGGCTGTCATACGCTTCTAGGTGTCCGAAGCCCAATATACGAAAGTAGCTTTAATAAAGCCCACCTGACCCCACGAAAGCTGAGAAA	0	0	0	0	0	0	0	0	0	0	0	0	0	0	0	0	0	0	0	0	0	0	0	0	0	0	0	0	0	0	0	0	1	0	0	0	0	0
OTU_1038	Chordata	Actinopteri	Gobiiformes	Gobiidae	Neogobius		96.988	Midori2	GCGGTTATACGAGAGGCCCAAGTTGACAAAAATCGGCGGAAAGCGTGGTTAGTGATATCACCTCCACTAAAGCCAAACACCTTCAAGGCTGTAATACGCCGAAGACAGGAAGCCCAATCACGAAAGTAGCTTTAATTTTCATGAAGCTACGAAAGCTAGGAAA	35	9	3	5	0	2	1	4	4	0	4	1	3	3	4	2	3	5	2	2	3	0	1	3	2	3	1	1	0	8	4	2	4	5	7	26	0	1
OTU_1039	Chordata	Mammalia	Rodentia	Cricetidae	Ondatra	Ondatra zibethicus	97.531	Midori2	GCGGTCATACGATTAACCCAAACTAATTATTCTCGGCGTAAAACGTGTTACTAGGAAACCAAAAATAGAATTAAAAACCATCCAATATGTGAAAATTCATCGCTACCTAAAACCAATGACGAAAGTAATTCTAGAATTCTTGACACACGAAAGCTACGATA	0	0	0	0	0	0	0	0	0	0	0	0	0	0	0	0	1	0	0	2	15	10	1	0	14	0	0	5	7	5	0	15	4	0	5	2	14	2
OTU_1040	Chordata	Actinopteri	Gobiiformes	Gobiidae	Neogobius		96.988	Midori2	GCGGTTATACGAGAGGCCCAAGTTGACAAAAATCGCGAAAAGCGTGGTTAGTGACATCACCTCCACTAAAGCCAAACACCTTCAAGTCTGTAATGCGCCCCCGAAGACAGCAAGCCCAATCACGAAAGTAGCTTTAATTTTCATGAAGCCACGAAAGCTAGGAAA	0	0	0	0	0	0	0	0	0	0	0	0	0	0	0	0	0	0	0	0	0	0	0	0	0	0	0	0	0	0	0	0	0	0	0	0	293	0
OTU_1042	Chordata	Actinopteri	Perciformes	Percidae	Perca		96.988	Midori2	GCGGTTATACGAGAGGCCCAAGTTGATAGACATCGGCGTAAAGCGTGGTTAAGATTAAAGACAATACTAAAGCCGAACACCTTCAGAGCTGTTATACGCATCCGAAGGTAAGAAGACCCCTCACGAAAGTGGCTTTATAGCCCCTGAACCCACGAAAGCTACGATA	0	0	0	0	0	0	0	0	0	0	0	0	0	0	0	0	0	1	2	0	0	0	0	2	0	0	2	1	3	0	0	2	0	1	5	0	0	1
OTU_1043	Chordata	Actinopteri	Perciformes	Percidae	Perca		96.875	Midori2	GCGGTTAAACGAGAGGCCCTAGTTGATAGACATCGGCGTAAAGCGTGGTTAAGATTAAAGACAATACTAAAGCCGAACACCTTCAGAGCTGTTATACGTATCCGAAGGTAAGAAGTTCAACCACGAAAGTGGCTTTATTACCCCTGAACCCACGAAAGCTGAGAAA	0	0	0	0	0	0	0	0	0	1	0	0	0	0	0	0	2	0	0	7	4	12	2	0	3	0	8	8	3	12	0	7	7	5	16	35	15	8
OTU_1044	Chordata	Actinopteri	Perciformes	Percidae			90.643	Midori2	GCGGTCATACAAGAGACCCAAATCAACTGTCCTACAAGCGGCGTAAAGAGTGGTTAAGATTAAAGACAATACTAAAGCCGAACACCTTCAGAGCTGTTATACGCATCCGAAGGTAAGAAGTTCAACCACGAAAGTGGCTTTATAGCCCCTGAACCCACGAAAGCTACGATA	0	0	0	0	0	0	0	0	0	0	0	0	0	0	0	0	0	0	0	0	0	0	0	0	0	0	1	0	0	0	0	0	0	0	0	0	0	0
OTU_1045	Chordata	Actinopteri	Cypriniformes	Leuciscidae	Leuciscus	Leuciscus leuciscus	97.661	Midori2	GCGGTTAAATGAGAGGCCCTAGTTGATGATACACGGCGTAAAGGGTGGTTAAGGAAAGCACAATAATAAAGCCAAATGGCCCTTTGGCTGTCATACGCTCCTAGGTGTCCGAAGCCCAATATACGAAAGTAGCTTTAATAAAGCCCACCTGACCCCACGAAAGCTGAGAAA	0	0	36	27	18	18	47	4	17	18	44	0	0	18	13	52	15	0	18	4	17	7	45	0	28	43	3	41	33	9	0	14	40	29	30	17	24	14
OTU_1046	Chordata	Actinopteri	Cypriniformes				96.471	Midori2	GCGGTTAAACGAGAGGCCCTAGTTAATATTACAACGGCGTAAAGGGTGGTTAAGGATATAAAAAATAAAGTCAAATGGCCCCTTGGCCGTCATACGCTTCTAGGAGTCCGAAGCCCTAATACGAAAGTAGCTTTAATAAAGCCCACCTGACCCCACGAAAGCTGAGAAA	0	0	0	1	3	3	2	0	0	0	0	0	0	0	0	3	3	0	0	7	4	1	2	0	4	1	0	1	1	8	0	17	4	5	54	35	9	7
OTU_1047	Chordata	Actinopteri	Cypriniformes	Leuciscidae	Alburnus	Alburnus alburnus	97.122	Midori2	GCGGTTGAACGAGGGGCCCTAGTTAATAATACGCGGCGTAAAGGGTGGTTAAGGAAAGCATAACAATAAAGCCGAATGGCCCTTTGGCTGTCATACGCTTCTAGGTGTCCGAAGTTCAACATACGAAAGTAGCTTTAATTTTCATGAAGCCACGAAAGCTAGGAAA	12	16	11	9	7	11	16	9	5	1	20	11	17	2	18	14	9	13	18	86	54	84	21	0	46	2	61	56	34	40	0	35	42	33	111	155	57	76
OTU_1048	Chordata	Actinopteri	Perciformes	Percidae	Sander		96.97	Midori2	GCGGTTATACGAGAGGCCCAAGTTGATAGACATCGGCGTAAAGCGTGGTTAAGACAAAAACAAAACTAAGGCCGAACACCTTCAGAGCTGTTATACGCACCCGAAGGTAAGAAATTCAACCACGAAAGTGGCTTTATAGCCCCTGAGCCCACGAAAGCTACGATA	0	0	0	0	0	0	0	0	0	0	0	0	1	0	2	0	2	3	0	5	9	10	1	0	2	0	4	4	2	0	0	5	4	13	5	6	9	6
OTU_1049	Chordata	Actinopteri	Cypriniformes	Leuciscidae	Rutilus	Rutilus rutilus	97.661	Midori2	GCGGTTAGACGAGAGGCCCCAGTTAATAATACACGGCGCAAAGGGTGGTTAAGGGAAGCACAATAATAAAGCCAAATGGCCCTTTGGCTGTCATACGCTTCTAGGTGCCCGAAGCCCAATATACGAAAGTAGCTTTAATAAAGCCCACCTGACCCCACGAAAGCTGAGAAA	0	7	5	0	0	5	11	1	0	0	0	0	23	10	34	28	4	1	0	10	1	10	7	0	0	0	6	3	0	12	5	21	5	10	11	11	14	9
OTU_1050	Chordata	Actinopteri	Gobiiformes	Gobiidae	Neogobius		96.988	Midori2	GCGGTTATACGAGAGGCCCAAGTTGACAAAAATCGCGAAAAACGTGGTTAGTGATATCACCTCCACTAAAGCCAAACACCTTCAAGGCTGTAATACGCCCCCGAAGACGGGAAGCCCAATCACGAAATTAGCTTTAATTTTCATTAAGCCACGAAAGCTAGGAAA	0	0	0	0	0	0	0	0	0	0	0	0	0	0	0	0	0	1	0	0	0	0	0	0	0	0	0	0	0	0	0	0	0	0	0	0	0	0
OTU_1052	Chordata	Actinopteri	Perciformes	Percidae	Perca		96.988	Midori2	GCGGTTATACGAGAGGCCCAAGTTGATAGACATCGGCGTAAAGCGTGGTTAAGATTAAAGACAATACTAAAGCCGAACACCTTCAGAGCTGTTATACGCATCCGAAGGTAAGAAGCCCAATCACGAAAGTAGCTTTATAACCCCTGAACCCACGAAAGCTACGATA	0	0	1	5	0	0	2	0	0	0	0	1	0	0	0	0	0	1	4	3	1	6	2	0	0	0	3	2	4	4	0	10	3	0	2	7	3	4
OTU_1053	Chordata	Actinopteri	Cypriniformes	Leuciscidae			94.675	Midori2	GCGGTTAAACGAGAGGCCCTAGTTAATAATACACGGCGTAAAGGGTGGTTAAGGAAAGCATAACAATAAAGCCAAATGGCCCCTTGGCCGTCATACGCTTCTAGGTGTCCGAGGCCCTATATACGAAAGTAGCTTAAATTAACCCGCCTGACCCCACGAAAGCTGAGAGA	0	142	57	135	27	97	54	39	66	34	83	18	70	41	93	108	88	65	91	158	598	301	283	0	123	77	99	209	70	271	0	99	102	190	193	239	506	101
OTU_1055	Chordata	Actinopteri	Perciformes	Percidae			93.082	Midori2	GCGGTTATACGAGAGGCCCAAGTTGATAGACATCGGCGTAAAGCGTGGTTAAGATTAAAGACAAAACTAAAGCCGAACACCCCCAAAGCTGTTATACGCATCCGGAGGTGAGAAGTTCAACCACGAAGGTGGCTTTATCTAACCTGAACCCACGAAAGCCAGCA	0	30	6	32	16	10	7	23	34	18	19	10	9	8	9	14	16	17	19	145	398	186	220	5	94	26	237	335	52	267	12	169	95	127	297	378	170	91
OTU_1056	Chordata	Mammalia	Rodentia	Cricetidae	Microtus		95.732	Midori2	GCGGTTAAACGATTAACCCAAACTAATATTCTCGGCGTAAAACGTGTTACTAGAAATATGCAAAATAGAATTAAAATCCATCCAATAAAAAATTCATCGCTGGACCTAAAACCAATGACGAAAGTAATTCTAATAAGCCTGATACACGATAGCTAAGGTA	0	0	0	0	0	0	0	0	0	0	0	0	0	0	0	0	0	0	0	0	0	0	0	0	0	0	0	0	0	0	0	0	77	0	0	0	0	0
OTU_1058	Chordata	Actinopteri	Perciformes	Percidae	Sander		95.783	Midori2	GCGGTTAAACGAGGGCCCCAGTTGATAACACCACGGCGTAAAGCGTGGTTAAGACAAAAACAAAACTAAAGCCGAACACCTTCAGAGCTGTTATACGCACCCGAAGGTAAGAAGTTCAACCACGAAAGTGGCTTTATTACCCCTGAACCCACGAAAGCTACGATA	0	4	16	19	12	30	12	18	13	5	5	2	13	7	10	5	7	11	14	33	24	63	42	0	31	8	48	20	4	31	0	27	48	57	33	89	54	42
OTU_1059	Chordata	Actinopteri	Perciformes	Percidae	Sander	Sander lucioperca	99.363	Midori2	GCGGTTATACGAGAGGCCCAAGTTGATAGACATCGGCGTAAAGCGTGGTTAAGACAAAAACAAAACTAAAGCCGAACACCTTCAGAGCTGTTATACGCACCCGAAGGTAAGAAGTTCAACCACGAAAGTGGCTTTATTACCCCTGAACCCACGACAGTTGAGGAA	0	0	0	0	0	1	0	0	0	0	2	0	3	0	0	0	0	0	0	1	0	0	2	0	7	0	7	4	0	3	0	3	3	0	8	5	2	1
OTU_1061	Chordata	Actinopteri	Cypriniformes	Leuciscidae			93.567	Midori2	GCGTTTATACGAGGGGCTCAAATTGATATTACACGGCGTAAAGGGTGGTTAAGGAAAGCATAACAATAAAGCCGAATGGCCCTTTGGCTATCATACGCTTCTAGGTGTCCGAAGCCCAATATACGAGAGTAGCTTTAATAAAGCCCACCTGACCCCACAAAAGCTGAGAAA	0	0	0	0	0	0	0	0	0	0	0	0	0	0	0	0	0	0	0	0	0	0	0	0	0	0	0	0	0	0	0	0	1	0	0	0	0	0
OTU_1063	Chordata	Actinopteri	Gobiiformes	Gobiidae	Neogobius		96.835	Midori2	GCGGTTATACGAGAGGCCCAAGTTGACAAAGATCGGCGTAAAGCGTGGTTAATGATAATTCCACTAAAGCCAAACACCTTCAAGGCTGTAATACGCCCCCGAAGACAGGACCCCAATCACGAAAGTAGCTTTAATTTTCATGAACCCACGAAAGCTAAAA	0	0	0	0	0	0	0	0	0	0	0	0	0	0	0	0	0	0	0	0	4	0	0	0	0	0	0	0	0	0	0	0	4	0	0	0	0	0
OTU_1064	Chordata	Actinopteri	Perciformes	Gasterosteidae	Gasterosteus	Gasterosteus aculeatus	98.101	Midori2	GCGGTTATACGAGAGGCCCAAGTTGATGAATTACGGCGTAAAGAGTGGTTAAGCTAAAATTAAAACTAAAAGCCGAACACCCCCAAAGCTGTTATACGCATCCGGAGGTGAGAAGTTCAACCACGAAGGTGGCTTTATCTAACCTGAACTCACGACAGTTGAGGAA	0	0	0	0	2	0	2	0	0	0	0	0	0	0	0	3	0	0	0	0	4	1	2	0	4	2	0	5	0	2	0	0	1	0	3	0	0	2
OTU_1065	Chordata	Actinopteri	Perciformes	Percidae	Perca		96.988	Midori2	GCTGTTATACGAGAGGCCCAAGTTGATAGACATCGGCGTAAAGCGTGGTTAAGATTAAATACTATACTAAAGCCGAACACCTTCAGAGCTGTTATACGCATCCGAGGGTAAGAAGTTCAACCACGAAAGTGGCCTTATAGCCCCTGAACCCACGAAAGCTACGATA	0	0	4	3	2	1	2	5	2	0	1	0	3	2	0	2	1	0	4	10	3	4	3	12	43	0	0	2	6	7	9	2	2	0	4	5	2	6
OTU_1066	Chordata	Actinopteri	Cypriniformes	Leuciscidae	Leuciscus		95.349	Midori2	GCGGTTAAACGAGAGGCCCCAGTTAATAATACACGGCGTAAAGGGTGGTTAAGAAAAGTATTAACAATAAAGCCGAATGGCCCTTTGGCTGTCATACGCTTCTTGTCCGAAGCCCAATATACGAAAGTAGCTTTAATAAAGTCCACCTGACCCCACGAAAGCTGAGAAA	0	0	0	0	0	2	0	1	0	0	1	0	0	0	0	0	0	0	0	7	8	10	13	0	0	0	0	0	0	23	0	6	4	0	20	16	6	6
OTU_1069	Chordata	Actinopteri	Cypriniformes	Leuciscidae	Rutilus	Rutilus rutilus	97.661	Midori2	GCGGTTAAACGAGGGGCCCCAGTTAATAATACGCGGCGTAAAGGGTGGTTAAGGGAAGCACAATAATAAAGCCAAATGGCCCTTTGGCTGTCATACGCTTCTAGGTGTCCGAAGCCCAATATACGAAAGTAGCTTTAATAGAGCCCACCTGACCCCACGAAAGCTGAGAAA	12	14	11	2	0	5	19	7	15	4	11	10	11	6	11	14	13	23	18	297	13	16	4	0	19	4	17	17	35	9	40	11	10	13	7	23	9	12
OTU_1070	Chordata	Actinopteri	Cypriniformes	Leuciscidae	Leuciscus		95.906	Midori2	GCGGTTAAACGAGAGGCCCTAGTTGATAATACACGGCGTAAAGGGTGGTTAAGGAAAGCATAACAATAAAGTCGAATGGCCCCTTGGCTGTCATACGCACCTAGGTGTCCGAAGTTCAACATACGAAAGTAGCTTTAATAACGCCCACCTGACCCCACGAAAGCTGAGGAA	0	0	301	83	0	84	12	134	27	0	0	0	0	0	86	0	155	0	168	0	37	72	37	0	187	0	177	133	0	146	0	18	0	60	18	273	43	2
OTU_1072	Chordata	Actinopteri	Cypriniformes	Cyprinidae			93.529	Midori2	GCGGTTAAACGAGAGGCCCCAGTTAATAATACACGGCGTAAAGGGTGGTTAAGGATAAATAATAATAAAGCCAAATGGCCCCTTGGCCGTCATACGCTCCTTGTCCGAGGCCCTATATACGAAAGTAGCTTTAATTAACCCTCCTGACCCCACGAAAACTGAGAAA	0	31	7	9	4	15	3	2	7	0	6	5	9	0	0	11	5	0	6	12	13	6	23	0	11	2	5	1	0	3	0	1	3	0	0	0	5	0
OTU_1073	Chordata	Actinopteri	Cypriniformes	Leuciscidae	Leuciscus		95.93	Midori2	GCGGTTAGACGAGAGGCCCTAGTTGATATTATAACGGCGTAAAGGGTGGTTAAGGAGAGCATAACAATAAAGCCGAATGGCCCTTTGGCTGTCATACGCTTCTAGGTGTCCGGAGCCCAATATACGAAAGTAGCTTTAATAAGGCCCACCTGACCCCACGAAAGCTGAGAAA	0	14	0	6	3	22	4	0	2	0	12	3	7	2	3	69	12	0	3	2	17	15	3	0	30	2	6	8	6	16	0	2	1	0	46	15	33	22
OTU_1075	Chordata	Actinopteri	Cypriniformes	Leuciscidae			93.567	Midori2	GCGGTTATACGAGGGGCTCAAATTGATATTACACGGCGTAAAGGGTGGTTAAGGAAAGCATAACAATAAAGCCGAATGGCCCTTTGGCTGTCATACGCTTCTAGGTGTCCGAAGCCCTAATACGAAAGTAACTTTAATAAACCCACCTGACCCCACGAAAGCTGAGAAA	5	0	0	0	0	4	8	0	3	0	0	0	0	2	4	4	1	4	1	6	8	8	4	0	3	4	7	6	3	14	0	11	5	10	26	34	13	13
OTU_1076	Chordata	Actinopteri	Cypriniformes	Leuciscidae	Abramis		96.512	Midori2	GCGGTTAAACGAGAGGCCCCAGTTAATAATACGCGGCGTAAAGGGTGGTTAAGAAAAGTATTAACAATAAAGCCGAATGGCCCTTTGGCTGTCATACGCTTCTAAGTGTCCGAAGCCCAATATACGAAAGTAGCTTTAATAACGCCCACCTGACCCCACGAAAGCTGAGAAA	0	0	0	0	0	2	0	0	0	0	0	0	0	0	0	2	0	0	0	2	4	10	2	0	0	0	6	1	0	10	0	0	0	2	7	20	6	4
OTU_1077	Chordata	Actinopteri	Gobiiformes	Gobiidae			93.711	Midori2	GCGGTTATACGAGAGGCCCAAGTTGATAGACATCAGCGAAAAGCGTGGTTAGTGATATCACCTCCACTAAAGCCAAACACCTTCAAGGCTGTAATACGCCCCCGAAGACAGGAAGCCCAATCACGAAAGTAGCTTTATTACCCCTGAACCCACGAAAGCCACGATA	0	0	0	0	0	0	0	0	0	0	0	0	0	0	0	0	0	0	0	0	0	3	0	0	0	0	2	0	0	0	0	1	0	0	0	4	0	0
OTU_1078	Chordata	Actinopteri	Perciformes	Percidae			94.578	Midori2	GCGGTTAAACGAGAGGCCCTAGTTGATAGACATCGGCGTAAAGCGTGGTTAAGATTAAAGACAATACTAAAGCCAAACACCTTCAAGGCTGTAATACGCACCCGAAGGTAAGAAGTTCAACCACGAAAGTGGCTTTATTACCCCTGAACCCACGAAAGCTACGATA	0	0	0	0	0	0	0	0	0	0	0	0	0	0	0	0	0	0	0	0	0	0	0	0	0	0	2	0	0	2	0	2	0	0	3	0	3	0
OTU_1079	Chordata	Actinopteri	Cypriniformes	Leuciscidae	Leuciscus		95.349	Midori2	GCGGTTAAACGAGAGGCCCCAGTTAATAATACACGGCGTAAAGGGTGGTTAAGGAAAGTATTCACAATAAAGCCAAATGGCCCTTTGCTGTCATGCGCTTCTAGGTGTCCGAAGCCCAATATACGAAAGTAGCCTTAATAAAGCCCACCTGACCCCACGAAAGCTGAGAAA	0	0	0	0	0	0	0	0	0	0	0	0	0	0	0	0	0	0	0	0	0	0	0	0	2	0	0	0	0	0	0	0	0	0	0	0	0	0
OTU_1080	Chordata	Actinopteri	Gobiiformes	Gobiidae	Ponticola		96.341	Midori2	GCGGCTATACGAGAGGCCCAAGTTGACAAAAATCGGCGTAAAGCGTGGTTAATAACTAATTTACTAAAGCCAAACACCTTTAAGGCTGTTATACGCCCCCAAAGGTAGGAAGACCCCTCACGAAATTAGCTTTAATTACTATGAATCCACGAAAGCTAGGAAA	0	8	3	0	0	0	3	4	1	2	3	0	0	1	4	0	1	3	0	7	3	12	6	0	0	5	3	3	8	6	0	0	1	13	5	3	5	8
OTU_1081	Chordata	Actinopteri	Gobiiformes	Gobiidae	Neogobius		96.386	Midori2	GCGGTTAAACGAGAGGCCCTAGTTGATAGACATCGGCGAAAAGCGTGGTTAGTGATATCACCTCCACTAAAGCCAAACACCTTCAAGCCTGTAATACGCCCCCGAAGACAGGAAGCCCAATCACGAAAGTAGCTTTAATTTTCATGAAGCCACGAAAGCTAGGAAA	0	4	10	8	5	13	14	10	3	3	9	6	6	7	3	16	14	11	10	56	82	61	25	0	38	12	34	32	51	59	0	41	37	33	93	147	49	44
OTU_1082	Chordata	Actinopteri	Perciformes	Percidae			93.939	Midori2	GCGGTCATACGATAGACCCAAACTAATAAACCCCGGCGTAAAGCGTGGTTAAGACAAAAACAAAACTAAAGCCGAACACCTTCAGAACTGTTATACGCACCCGAAGGTAAGAAGTTCAACCACGAAAGTGGCTTTATTACCCCTGAACCCACGAAAGCTACGATA	0	0	0	0	0	0	0	0	0	0	1	0	0	0	0	0	0	0	0	0	0	0	0	0	0	0	0	0	0	1	0	0	0	5	0	0	5	0
OTU_1083	Chordata	Actinopteri	Cypriniformes	Leuciscidae			96.491	Midori2	GCGGTTAAACGAGGGGCCCTAGTTAATAATACGCGGCGTAAAGGTGGTTAAGGAAAGCATAACAATAAAGCCGAATGGCCCTTTGGCTGTCATACGCTTCTATGTGTCCGAAGCCCAATATACGAAAGTAGCTTTAATAAAATCCACCTGACCCCACGAAAGCTGAGAAA	0	0	0	0	36	17	0	66	74	0	67	81	38	0	62	0	0	76	6	63	54	21	16	0	214	0	31	27	58	0	0	0	0	0	0	0	0	17
OTU_1084	Chordata	Actinopteri	Perciformes	Percidae			92.771	Midori2	GCGGTTAAACGAGAGGCCCTAGTTAATAATACACGGCGTAAAGCGTGGTTAAGATTAAAGACAATACTAAAGCCGAACACCTTCAGAGCTGTTATACGCATCCGAAGGTAAGAAGTTCAACCACGAAAGTGGCTTTAATAACGCCCACCTGACCCCACGAAAGCTGAGAAA	0	0	0	0	0	0	0	0	0	0	0	0	0	0	1	0	0	0	0	5	0	2	3	0	2	0	3	0	0	4	0	0	1	0	5	6	4	3
OTU_1085	Chordata	Actinopteri					96.45	Midori2	GCGGTTAGACGAGAGGCCCTAGTTGATAGACATCGGCGTAAAGCGTGGTTAAGGACAAACAAAAATAAAGTCAAATGGCCCCTTGGCCGTCATACGCTTCTAGGCGTCCGAAGCCCTAATACGAAAGTAACTTTAATGAACCCACCTGACCCCACGAAAGCTGAGGAA	0	0	0	0	0	1	0	3	0	0	0	0	0	0	0	5	0	0	0	3	0	6	2	0	0	0	0	8	10	0	0	0	0	0	23	5	2	3
OTU_1086	Chordata	Actinopteri	Cypriniformes	Cyprinidae			96.951	Midori2	GCGGTTAGACGAGAGGCCCTAGTTGATATTATAACGGCGTAAAGGGTGGTTAGGGAAATAATAATAAAGCCAAATGGCCCCTTGGCCGTCATACGCTTCTAGGTGTCCGAGGCCCTATATACGAAAGTAGCTTTAATTAACCCCCTGACCCCACGAAAGCTACGATA	0	3	1	2	0	3	0	2	0	4	2	0	0	0	1	0	0	4	0	0	19	0	35	0	2	2	8	5	3	9	0	2	0	5	2	5	386	4
OTU_1087	Chordata	Actinopteri	Perciformes	Percidae	Perca		96.988	Midori2	GCGGTTATACGAGAGGCCCAAGTTGATAGACATTGGCGTAAAGCGTGGTTAAGATTAAAGACAATACTAAAGCCGAACACCTTCAGAGCTGTTATACGCATCCGAAGGTAAGAAGTTCAACCACGAATTGGCTTTATTACCCCTGAACCCACGAAAGCTACGATA	0	2	0	0	0	0	0	0	1	3	0	0	0	0	0	2	0	1	6	6	8	12	5	0	2	4	12	2	12	4	0	9	4	9	12	28	30	37
OTU_1088	Chordata	Actinopteri	Cypriniformes	Leuciscidae			94.767	Midori2	GCGGTTAGACGGCCCTAGTTGATATTATAACGGCGTAAAGGGTGGTTAAGGAGAGCATAACAATAAAGCCGAATGGCCCTTTGGCTGTCATACGCTTCTAGGTGTCCGAAGCCCAATATACGAAAGTAGCTTTAATAAAGCCCACCTGACCCCACGAAAGCTGAGAAA	0	19	7	28	4	15	15	6	7	2	12	0	15	8	10	25	27	7	22	30	79	25	12	0	14	4	14	25	7	34	0	11	11	24	29	29	77	17
OTU_1089	Chordata	Actinopteri	Gobiiformes	Gobiidae	Neogobius	Neogobius melanostomus	97.561	Midori2	GCGGTTAAACGAGAGGCTCAAGTTGACAAAAATCGGCGAAAGGCGTGGTTAGTGATATCACCTCCACTAAAGCCAAACACCTTCAAGGCTGTAATACGCCCCCGAAGACAGGAAGCCCAATCACAAAAGTAGCTTTAATTTTCATGAAGCCACGAAAGCTAGGATA	3	0	4	3	0	6	4	2	1	3	2	4	3	1	2	4	4	4	4	8	6	7	0	0	11	4	6	2	2	7	0	6	5	3	6	10	5	12
OTU_1090	Chordata	Actinopteri	Cypriniformes	Leuciscidae			90.361	Midori2	GCGGTTATACGAGAGGCCCAAGTTAATAATACACGGCGTAAAGGGTGGTTAAGGGAAGTATTAACAATAAAGCCGAATGGCCCTTTGGCTGTCATACGCTTCTAGGTGTCCGAAGTTCAACCACGAAAGTGGCTTTATTACCCCTGAACCCAAAAGCTACGATA	0	0	0	0	0	0	0	0	0	0	0	0	0	0	0	0	0	0	0	0	0	0	0	0	0	0	0	0	0	0	0	0	3	0	0	0	0	2
OTU_1093	Chordata	Actinopteri	Cypriniformes	Leuciscidae	Rutilus	Rutilus rutilus	97.661	Midori2	GCGGTTAAACGAGAGGCCCCAGTTAATAATACACGGCGTAAAGGGTGGTTAGGGGAAGCACAATAATAAAGCCAAATGGCCCTTTGGCTGTCATACGCTTCTAGGTGTCCGAAGCCCAATATACGAAAGTAGCTTTAATAACGCCCACCTGACCCCGCGAAAGCTGAGAAA	2	2	11	3	3	5	11	2	14	1	0	2	5	6	4	7	0	4	1	29	19	24	15	0	15	5	8	23	12	14	7	11	18	15	21	21	7	9
