# Supplementary material for: Is it worth the extra mile? Comparing environmental DNA and RNA metabarcoding for vertebrate and invertebrate biodiversity surveys in a lowland stream
Source: PeerJ. 2024 Oct 24;12:e18016. doi: 10.7717/peerj.18016 (PMC11512801; doi:10.7717/peerj.18016)
Supplement: Supplemental Information 9 [file peerj-12-18016-s009.xlsx]

## Sheet: Sheet1
ID	Phylum	Class	Order	Family	Genus	Species	Similarity	Status	seq	LDNA_1	LDNA_2	LDNA_3	LDNA_4	LDNA_5	LDNA_6	LDNA_7	LDNA_8	LDNA_9	LDNA_10	LDNA_11	LDNA_12	LDNA_13	LDNA_14	LDNA_15	LDNA_16	LDNA_17	LDNA_18	LDNA_19	LRNA_1	LRNA_2	LRNA_3	LRNA_4	LRNA_5	LRNA_6	LRNA_7	LRNA_8	LRNA_9	LRNA_10	LRNA_11	LRNA_12	LRNA_13	LRNA_14	LRNA_15	LRNA_16	LRNA_17	LRNA_18	LRNA_19
OTU_892	Arthropoda	Arachnida	Trombidiformes	Eriophyidae	Abacarus	Abacarus hystrix	100	Published	TTTATCTCATATTTCTTTCCATACGGATATTTCTGTCGACTTAGCAATCTTCTCTCTTCATCTGGGAGGGGTTTCCTCTATTCTTAGTAGCATCAATTTCATTACCACTATTTTTAGAATGCGATTTTCGGGGTTTAATATAGAGCGTTTACCCTTATTTGTTTGGTCCATAATGGTGACCTCGTTCCTTTTATTATTTTCCCTC	29	0	0	3	0	0	0	2	26	0	0	2	3	0	0	1	1	0	0	0	0	0	0	0	0	0	0	0	0	0	0	0	0	0	0	0	0	0
OTU_895	Arthropoda	Arachnida	Trombidiformes	Eriophyidae	Aculodes	Aculodes mckenziei	100	Published	TCTTTCTAGGATTTCCTTTCACACAGACTTCTCCGTTGACTTAGCAATTTTCTCTCTACATTTAGGTGGAGTATCCTCTATTCTTAGTAGAATTAACTTTATTACCACAATTTTTAGAATACGTTTCTCTGGATTTAATTTAGAGCGGATACCCCTTTTTGTGTGGTCTATGTTAGTTACCTCTTTTCTTTTACTCTTCTCTTTG	0	0	0	0	29	0	0	0	0	0	0	0	0	0	0	0	0	0	0	0	0	0	0	10	0	0	0	0	0	0	0	0	0	0	0	0	0	0
OTU_3306	Arthropoda	Arachnida	Opiliones	Phalangiidae	Phalangium	Phalangium opilio	99.51	Private	TTTATCAAGAAATATTGCTCATACAGGGGCCTCTGTAGATTTAACTATTTTTTCATTACACTTAGCAGGTGTATCCTCAATTTTAGGGGCTATCAATTTTATTACTACAATTATCAATATACGAACACAAGGAATAATTATAGAACGAATACCTTTTTTTGTCTGATCAGTAAAAATTACAGCTATTTTACTTCTTCTATCTTTG	0	0	0	0	0	0	0	0	0	0	0	0	0	0	0	1	0	0	0	0	0	0	0	0	0	0	0	0	0	0	0	0	0	0	0	0	0	0
OTU_2318	Arthropoda	Arachnida	Sarcoptiformes	Ceratozetidae	Trichoribates	Trichoribates incisellus	98.01	Published	TCTTGCTGGCAATTTATTTCATTCAGGTTTTTCTGTTGACTTAGCAATTTTTAGTTTGCATCTAGCAGGAGCTTCTTCAATTCTGGGAGCAATTAATTTTATCACTACAATTTTAAACATACGGTCTTCTTCAATAACATTAGATTCAATTCCTTTATTTGTTTGATCTGTCCTAATTACAGCGGTTCTTTTACTACTATCTCTT	16	0	0	0	0	0	0	0	0	0	0	0	0	0	0	0	0	0	0	0	0	0	0	0	0	0	0	0	0	0	0	0	0	0	0	0	0	0
OTU_1777	Arthropoda	Arachnida	Sarcoptiformes	Ceratozetidae	Trichoribates	Trichoribates novus	100	Published	TTAGCAGGAAACCTTTTTCATTCTGGAATCTCTGTGGACCTCGCTATTTTTAGCTTACATCTAGCCGGCGCTTCATCTATCTTAGGTGCCATTAACTTCATTACTACTATTTTGAACATACGATCTTCCTCTATAACATTAGACTCTATTCCTTTGTTTGTATGATCTGTCTTAATCACCGCAGTCCTACTGCTTCTTTCATTA	0	0	0	0	0	0	0	0	0	0	0	0	0	0	0	0	1	0	0	0	0	0	0	0	0	0	0	0	0	0	0	0	0	0	0	0	0	0
OTU_116	Arthropoda	Arachnida	Trombidiformes	Triophtydeidae	Triophytydeus		95.05	Early-Release	TTTATCTAGTCAATTATTTCATAGAGGTCAATCAGTAGACTTAACTATCTTCTCCCTTCATTTAGCTGGGATCTCATCAATTTTAGGAGCCATTAATTTTATCACAACTATTATTAATATACGATCCTCATCTTCTTCTTTTGAACGAATCCCCCTTTTTGTATGAAGAGTTCTCATTACTGCAGTTTTACTACTTCTCTCATTA	0	0	0	0	0	0	0	0	0	0	0	0	0	0	0	0	0	0	0	0	0	0	0	0	0	0	0	0	0	0	0	0	577	0	0	0	0	0
OTU_131	Arthropoda	Arachnida	Trombidiformes	Penthaleidae			90.2	Published	TTTATCAAATCAAATATTTCATAATGGAAGATCAGTAGATTTAACAATTTTTTCATTACACATAGCAGGAGTATCATCTATTTTAGGAGCTATTAATTTTATTACAACTATTTTTAACATACGCCCCAAAATAATATCTTTTGAACGAATCCCATTATTTGTATGATCTGTAATAATTACAGCAGTATTATTATTACTATCATTA	0	5	0	0	0	1	0	0	222	1770	0	0	5	0	1	0	3	0	0	0	0	23	4	0	0	0	0	1	167	0	0	0	0	0	0	2	0	0
OTU_585	Arthropoda	Arachnida	Trombidiformes				86.78	Published	CTTATCAACTCAACCATTTCATAATAATACTTCAGTAGATATGACCATTTTTTCCTTACACTTAGCTGGTATTTCTTCAATTCTAGGAGCAATCAACTTTATTACAACCATCATGAACATACGACCAAAAATAATAACCTTCGAGCGAATTCCATTATTCCTATGATCTATTATAATCACAACAATCTTACTACTTCTATCCTTA	0	0	0	0	0	0	0	0	30	0	0	0	0	0	0	0	0	0	0	0	0	0	0	0	0	0	0	35	0	0	0	0	0	0	0	0	0	0
OTU_626	Arthropoda	Arachnida	Trombidiformes	Eupodidae			100	Published	TTTATCTAATTATTTATTTCATGGTGGTATTTCTGTAGATTTAACTATTTTTTCTTTACACATAGCTGGTGTATCTTCAATTTTAGGTGCTATTAATTTTATTACAACAATTTTGAATATACGTATATCAATAATAACTTTTGAACGTTTACCTTTATTTGTTTGATCTGTTTTAATTACAGCTGTTTTATTGTTACTTTCATTA	6	0	0	48	7	2	0	4	1	20	0	1	7	0	0	0	0	0	0	10	0	0	10	0	0	0	0	0	12	1	0	0	0	0	0	0	0	0
OTU_868	Arthropoda	Arachnida	Trombidiformes	Triophtydeidae	Triophytydeus		96.04	Published	TTTATCAAATCAACTATTCCATAGAGGCCAATCGGTAGACTTAACTATCTTTTCTCTTCACTTAGCTGGTATTTCATCTATTTTAGGAGCTATTAACTTTATCACAACTATTATTAATATACGATCAGCATCTTCTTCTTTTGAACGGATCCCTCTCTTTGTGTGAAGAGTTTTAATCACAGCTATTTTACTTCTACTATCCCTA	0	0	0	0	0	0	0	25	0	0	0	0	0	0	0	0	0	0	0	0	0	0	0	0	0	0	23	0	0	0	0	0	0	0	0	0	0	0
OTU_873	Arthropoda	Arachnida	Trombidiformes				87.94	Published	CCTATCTAGCCAAATATTTCATAGAGGACAATCAGTAGACCTGACTATTTTTTCTCTGCACTTAGCAGGGATTTCTTCCATCTTAGGGGCCATTAACTTTATTACTACGATTTTTAATATGCGATCTAACTCTTTCTCTTTTGAACGAATTCCTCTTTTTGTATGAAGAGTTCTGATCACAGCAGTATTATTACTTTTATCCCTT	0	0	0	0	0	0	0	0	0	0	25	0	0	0	0	0	0	0	0	0	0	0	0	0	0	0	0	0	0	29	0	0	0	0	0	0	0	0
OTU_1249	Arthropoda	Arachnida	Trombidiformes				86.36	Published	CTTATCTTCTTATTTATTTCATAGTGGAATAGCAGTGGATTTATCTATTTTTTCTTTACATATGGCAGGAATATCTTCAATTTTAGGTGCAATTAATTTTATTGTAACTATTTTAAATATACGAATGCCTTTAATAGTTTTTGAACGAATACCTTTATTTGTTTGGTCTGTTTTAATTACTGCTATTTTATTACTATTATCATTA	0	0	0	0	0	7	0	0	0	0	0	0	0	0	0	0	0	0	0	0	0	0	0	0	13	0	0	0	0	0	0	0	0	0	0	0	0	0
OTU_1293	Arthropoda	Arachnida	Trombidiformes				88.73	Published	TTTATCAAATCAAATATTTCATAATGGAAGCTCAGTAGATTTAACAATTTTTTCACTACACATAGCAGGAGTATCATCCATTTTAGGAGCTATTAATTTCATTACAACTATTTTTAACATACGCCCTAAAATAATATCTTTTGAACGAATCCCATTATTTGTATGATCTGTAATAATTACAGCAGTACTATTATTACTGTCATTA	0	0	0	0	0	0	0	0	0	14	0	0	0	0	0	0	0	0	0	0	0	0	0	0	0	0	0	0	15	0	0	0	0	0	0	0	0	0
OTU_1324	Arthropoda	Arachnida	Trombidiformes	Eupodidae	Eupodes		100	Private	TTTATCTAGTTATTTGTTTCATGGTGGTATTTCTGTTGATTTAACAATTTTTTCTTTACATATAGCTGGGATTTCTTCAATTCTTGGGGCAATTAATTTTATTACAACTATTTTAAATATACGTTTAAATATTATAAGCTTTGAACGATTACCTTTATTTGTTTGATCAGTATTAATTACTGCTGTTCTTTTATTATTATCTTTA	0	0	0	0	0	0	0	16	0	0	0	0	0	0	0	0	0	0	0	12	0	0	0	0	0	0	2	0	0	0	0	0	0	0	0	0	0	0
OTU_1359	Arthropoda	Arachnida	Trombidiformes	Tydeidae			100	Published	CCTTTCATCCCAAATTTTTCATATAAATAAAAGTGTGGACTTAACAATTTTTTCCCTTCATCTAGCCGGAGTCTCATCAATTTTAGGTGCCATCAACTTTATTACTACTATTGTAAATATACGCACAAAAATAATTAAATTTGAGCAAATTCCACTATTCCTATGGTCAATTTTAATCACAACCATTCTATTGTTACTATCCTTA	0	0	0	0	0	0	0	6	0	0	0	0	0	0	0	0	0	0	0	0	0	0	0	0	0	0	11	0	0	0	0	0	0	0	0	0	0	0
OTU_1408	Arthropoda	Arachnida	Trombidiformes	Eupodidae			96.08	Published	TTTATCTAATTATTTATTCCATGGTGGTATTTCTGTAGACTTAACTATTTTTTCTTTACACATAGCTGGTGTATCTTCAATTTTAGGTGCTATTAATTTTATTACCACAATTTTGAATATACGAATATCAATAATGACTTTTGAACGTTTACCTTTATTTGTTTGATCTGTCTTAATTACAGCTGTTTTATTGTTACTATCACTA	21	3	0	0	0	0	0	0	0	0	0	0	0	0	0	0	0	0	0	15	0	0	0	0	0	0	0	0	0	0	0	0	0	0	0	0	0	0
OTU_1443	Arthropoda	Arachnida	Trombidiformes	Eriophyidae			97.4	Early-Release	ACTTTCTAGAATCAATTTTCATTCTGATATCTCAGTAGATTTAGCCATTTTTTCTCTACACCTTGGGGGGATTTCTTCCATTTTGAGTTCTATCAACTTCATTTCAACCATTTTCGTCATACGTTTTTCTGGACTGCTTATAGAGCGTCTTCCTCTTTTTGTTTGATCTATGTTAGTGACTTCCTTCTTACTTCTTTTTTCTCTT	0	0	0	0	0	0	0	18	0	0	0	0	0	0	0	0	0	0	0	0	0	0	0	0	0	0	0	0	0	0	0	0	0	0	0	0	0	0
OTU_3020	Arthropoda	Arachnida	Trombidiformes				86.34	Published	ATTATCTAATAGAATATTTCACAGAAGATCATCAGTAGACTTAACAATTTTTTCCATTCATATAGCAGGAATTTCTTCTATTTTAGGAGCAATTAATTTCATCACTACTATTTTAAATATACGATCCAAAATAATAAACTTCGAACGAATTCCATTATTTGTTTGATCAGTTTTAATTACGGCTGTACTTTTACTACTATCCTTA	0	19	0	0	0	0	0	0	0	0	0	0	0	0	0	0	0	0	0	0	2	0	0	0	0	0	0	0	0	0	0	0	0	0	0	0	0	0
OTU_3417	Arthropoda	Arachnida	Trombidiformes				86.27	Published	ATTATCAAACCAAATTTCTCATTCTGGAGCTGCAGTAGATTTAGCAATTCTATCTCTACATTTAGCAGGTGCCTCTTCTATTATAAGTTCATTAAACTTCATTATTACCATTTTAAATATGCGACCTAAAACAATATGATTAGAACATGTTCCTTTATTTGCCTGAAGTGTTCTGATTACCACCCTACTCTTATTACTAGCTTTA	0	0	0	5	0	0	0	0	0	0	0	0	0	0	0	0	0	0	0	0	0	0	0	0	0	0	0	0	0	0	0	0	0	0	0	0	0	0
OTU_3480	Arthropoda	Arachnida	Trombidiformes	Bdellidae	Cyta		100	Published	TCTATCAATTAATTCTTACCACACAGGATCATCAGTAGACTTAACAATTTTTTCTCTACATTTAGCAGGTGTTTCATCAATTCTTGGGGCAATTAATTTTATTACTACAATTATCAGTATACGAACACCAAAAATATCATTTGAACGTATTCCTTTATTTGTATGATCAGTATTTATTACTGTAATCTTATTATTACTAGCTCTT	0	0	0	2	0	0	0	0	0	0	1	0	0	0	0	0	0	0	0	0	0	0	0	0	0	0	0	0	0	0	0	0	0	0	0	0	0	0
OTU_3588	Arthropoda	Arachnida	Sarcoptiformes	Scutoverticidae	Scutovertex		95.1	Published	TCTGTCTGGAAATCTTTTCCATTCAGGAATTTCGGTTGATCTGGCTATTTTCAGACTACATCTGGCTGGAGCCTCTTCTATTCTTGGTGCTATCAACTTTATTACCACTATTTTGAACATACGTTCTTCTACTATGACCCTGGATTCTATCCCTTTGTTTGTCTGGTCTGTGTTAATTACAGCAGTTTTACTACTTTTGTCTCTT	0	0	0	0	0	0	0	0	0	0	0	1	0	0	0	0	0	0	0	0	0	0	0	0	0	0	0	0	0	0	0	0	0	0	0	0	0	0
OTU_4072	Arthropoda	Arachnida	Sarcoptiformes	Nanorchestidae	Nanorchestes		98.02	Published	TTTATCTTCTTGTCTTGGGCACGGTGAGTCTTCAGTTGATTTTACTATTTTTTCACTTCATTTAGCTGGGGCTTCTTCTATTTTAGGGGCTATTAATTTTATTGTAACTATTTTAAACATACGGGGTCTTATAATAAACTTTGATAAAGTCCCTTTGTTTGTTTGGTCAGTGTTTGTCACTGCTGTTCTGTTGCTTTTGTCTTTA	0	0	0	0	0	0	0	0	0	0	0	0	0	0	0	0	0	2	0	0	0	0	0	0	0	0	0	0	0	0	0	0	0	0	0	0	0	0
OTU_4470	Arthropoda	Arachnida	Trombidiformes	Eupodidae			95.59	Published	TTTATCTAATTATTTATTTCATGGTGGTATTTCTGTAGACTTAACTATTTTTTCCTTACATATAGCCGGTGTTTCCTCAATTTTAGGGGCTATTAATTTTATTACAACAATTTTGAATATACGAATATCAATAATAACTTTTGAACGTTTACCTTTATTTGTTTGATCTGTCTTAATTACAGCTGTTTTATTGTTACTTTCATTA	0	0	0	0	0	0	0	0	0	0	0	0	0	0	0	0	0	0	0	3	0	0	0	0	0	0	0	0	0	0	0	0	0	0	0	0	0	0
OTU_2225	Rotifera	Bdelloidea	Bdelloidea	Philodinidae	Philodina	Philodina plena	100	Published	CTTGTCTAATTCTGTTTATCATTTTGGAGGCTCTATTGATTTAGCTATTTTTAGTTTACATGTAGCTGGTGTTTCTTCTATTTTGGGTGGAATTAATTTTATTACTACATGTTTAAAGGGTAAAATTAGTTATGTTTTAAGTTTAGAATTTTTAAATTTGTTTTGTTGAGCTATGGTAGTTACTAGTTTTTTATTAGTTTTAAGGTTA	0	0	0	0	0	0	0	0	0	0	0	0	0	0	0	0	0	4	0	0	0	0	6	0	0	0	0	0	0	0	0	0	0	0	0	0	0	0
OTU_1498	Rotifera	Bdelloidea	Philodinida	Habrotrochidae			90.69	Published	TTTATCTAATTCTGTCTATCATTTTGGAGGTTCAGTAGATTTAGCTATTTTCAGTTTACATGTGGCTGGTGTTTCTTCAATTTTAGGAGGTATTAATTTTATTACTACGTGTTTAAAAGGCAAAATTAGGTATGTATTGAGATTAGAGTTTTTGAATTTATTTGTATGAGCTATAATTGTTACTAGATTCTTATTAGTTTTAAGTTTA	0	0	0	0	0	0	0	1	3	0	0	0	0	0	0	0	0	0	3	0	0	0	0	0	0	0	0	2	0	0	0	0	0	0	0	0	0	3
OTU_1763	Rotifera	Bdelloidea	Bdelloidea	Philodinidae	Macrotrachela		96.34	Published	TTTATCTAATTCTGTTTATCATTTTGGGGGTTCTGTTGATTTAGCTATTTTTAGTTTACATGTTGCTGGAGTATCTTCTATTTTAGGAGGTATTAATTTTATTACTACTTGTATAAAAGGTAAGATTAGATATGTACTAAGGTTTGAATATTTAACTTTGTTTGTTTGGGCTATAATTGTTACTAGATTTTTATTAGTATTAAGTTTA	0	0	0	5	0	0	0	0	0	0	1	0	0	0	0	0	0	0	0	0	0	0	5	0	0	0	0	0	0	1	0	0	0	0	0	0	0	0
OTU_2761	Rotifera	Bdelloidea	Adinetida				86.76	Published	TTTATCAAATTCTGTGTATCAATTTGGGGGCTCTATTGATTTAGCTATTTTTAGTCTTCATATTGCGGGTGTCTCTTCTATTTTAGGAGGTATTAATTTTATTACTACTTGTTTAAAAGGGAAGGTTAGTTATGTTTTGAGTCTTGAATTTTTAACTTTATTTGTGTGAGCTATAGTAGTAACTAGATTTCTGTTAGTGTTAAGACTT	0	0	0	0	0	0	0	0	0	0	0	0	0	0	0	0	0	0	0	0	0	0	0	0	0	0	0	0	0	0	0	0	0	1	0	0	0	0
OTU_2823	Rotifera	Bdelloidea	Bdelloidea	Philodinidae			92.71	Published	ATTATCAAATTCTGTCTATCATTTTGGAGGATCGGTTGATTTAGCTATTTTTAGATTACATGTTGCTGGAGTATCTTCTATTTTAGGAGGGATTAATTTTATTACTACTTGTTTGAAAGGTAAGATTAGATATGTTTTAAGATTAGAATTTTTGACTTTATTTGTTTGAGCTATAATTGTTACTAGGTTTTTATTAGTATTAAGATTA	0	8	0	0	0	0	0	0	0	0	0	0	0	0	0	0	0	0	0	0	0	0	0	0	0	0	0	0	0	0	0	0	0	0	0	0	0	2
OTU_2919	Rotifera	Bdelloidea	Adinetida	Adinetidae			91.18	Published	TTTGTCTAATTCTGTATATCATTTTGGAGGGTCTGTTGATTTAGCTATTTTTAGATTGCATGTTGCAGGGGTTTCATCAATTTTAGGAGGTATTAATTTTATTACTACATGTATAAAAGGTAAGGTCAGTTATGTAATAAGGTTTGAATTTTTAACTTTATTTGTTTGGGCAATGATTGTTACAAGATTTTTATTAGTTTTAAGTTTG	0	0	0	0	0	0	3	0	0	0	0	0	0	0	0	0	0	0	0	0	0	0	0	0	0	2	0	0	0	0	0	0	0	0	0	0	0	0
OTU_3194	Rotifera	Bdelloidea	Philodinida	Habrotrochidae			91.67	Private	TTTATCAAATTCTGTTTATCATTTTGGGGGTTCTGTTGATTTAGCTATTTTTAGTTTACATGTAGCTGGGGTTTCTTCTATTTTAGGTGGAATTAATTTTATTACAACTTGTTTAAAAGGTAAAATTAGTTATGTTATAAGATTTGAATTTTTAAATTTATTTGTTTGGGCTATAGTAGTTACGAGATTTTTATTAGTATTAAGTTTA	0	0	0	0	0	0	0	0	0	0	0	1	0	0	0	0	0	0	0	0	0	0	0	0	0	0	0	0	0	0	0	0	0	0	0	0	0	0
OTU_3202	Rotifera	Bdelloidea	Adinetida	Adinetidae			90.2	Published	TTTATCAAATTCTGTTTATCATTTTGGAGGTTCAGTGGATTTAGCTATTTTTAGATTACATGTTGCTGGTGTTTCTTCCATTTTAGGCGGGATTAATTTTATTACTACTTGTTTAAAAGGGAAAATTAGTTATGTGTTAAGTATAGAATTTTTGAATTTATTTGTTTGAGCTATAATTGTAACTAGATTCTTATTGGTATTAAGATTA	0	0	3	0	0	0	0	0	0	0	0	0	0	0	0	0	0	0	0	0	0	11	0	0	0	0	0	0	0	0	0	0	0	0	0	0	0	0
OTU_3752	Rotifera	Bdelloidea	Bdelloidea	Philodinidae			90.64	Published	TTTATCTAATTCTGTTTATCATTTTGGGGGGTCTGTTGATTTAGCTATTTTTAGTTTACATGTAGCTGGGGTTTCTTCAATTCTTGGAGGGATTAATTTTATTACAACATGTATAAAAGGAAAAATTAGTTATGTATTAAGGTTTGAGTTTTTAACTTTATTTGTTTGAGCAATAATTGTACAAGATTTTTGTTAGTTTTAAGCTTA	0	0	0	1	0	0	0	0	0	0	0	0	0	0	0	0	0	0	0	0	0	0	0	0	0	0	0	0	0	0	0	0	0	0	0	0	0	0
OTU_603	Mollusca	Bivalvia	Unionida	Unionidae	Unio	Unio tumidus	100	Published	TTTGTCTAATAAAACATTTCACTCTGGGGTTGCTGTTGATGTGCTAATTTTTTCTTTACATTTGGCTGGGGTTTCTTCAATTCTTGGTTCATTAAATTTTATTACTACTATTGTAAATATGCGCGCAGATGTTATACAAGCTGAGTGTATACCTTTGTTTGTGTGATCTGTTTTGTGTACGGCTGGTTTGGTATTAATTTCTTTT	0	3	0	19	1	9	16	13	0	36	0	1	16	2	18	8	4	20	3	0	0	0	0	0	0	0	0	0	0	0	0	0	0	0	0	0	0	0
OTU_267	Mollusca	Bivalvia	Venerida	Cyrenidae	Corbicula		100	Private	TCTCTCTAGAAATATTGCTCATTCTGGCCCGTCAGTAGATTTAGCTATTTTCTCTCTTCATTTAGGGGGTATTTCTTCAATTTTAGCTTCAATTAATTTTGTTGTCACTAGATTTTGTATGCGTCCTGGAGCTCAAAAACTAATCCGGACTACAATGTTTATTTGATGTATTGTTGTAACTGGAATTTTGTTGATTATTGCAATG	215	166	207	64	22	14	29	19	8	39	17	12	25	36	18	7	16	21	12	16	6	20	2	6	0	0	0	1	3	0	0	2	2	0	0	1	0	2
OTU_1149	Arthropoda	Branchiopoda	Anomopoda	Chydoridae	Chydorus	Chydorus sphaericus	100	Private	TCTATCGGCTGGAATTGCTCATTCAGGAGCTTCAGTTGATCTTAGTATTTTTTCTTTACACCTTGCAGGAATTTCATCAATTCTTGGAGCTGTTAATTTTATCACTACTGTAATTAATATACGGTCGTATGGTATAACTCTAGATCGTATTCCCCTGTTAGTATGAGCAGTAGCTATTACTGCTTTGCTTCTTTTACTGAGTCTT	0	0	0	0	0	0	9	0	0	0	0	0	0	0	0	0	0	0	0	0	0	0	0	0	0	7	0	0	0	0	0	0	0	0	0	0	0	0
OTU_4084	Arthropoda	Branchiopoda	Anomopoda	Eurycercidae	Eurycercus	Eurycercus lamellatus	100	Private	ACTTTCTGCGGGAATCGCTCATGCTGGGGCATCAGTAGATTTAAGAATTTTTTCTCTTCATTTGGCTGGAATTTCTTCCATTTTGGGAGCTGTAAATTTTATTACCACAATTTTAAATATACGTTCTGTGGGAATAAGAATAGATCGAATTCCTTTATTTGTTTGAGCGGTAGGGATTACAGCTCTTCTTCTTCTTCTTAGCCTA	0	0	0	0	0	0	0	0	0	0	0	0	0	0	0	3	0	0	0	0	0	0	0	0	0	0	0	0	0	0	0	0	0	0	0	0	0	0
OTU_3094	Arthropoda	Branchiopoda	Anomopoda	Chydoridae	Pleuroxus	Pleuroxus denticulatus	100	Published	TCTTTCGGCTGGTATTGCCCACGCAGGGGCATCTGTTGACTTAAGAATCTTTTCTCTCCATTTAGCTGGAATTTCTTCAATTTTAGGAGCGGTTAACTTTATTACAACTGTGATTAACATGCGTTCTCATGGAATGACATTAGATCGAATTCCTTTATTAGTCTGGGCAGTAGCAATTACTGCTCTTTTACTCCTTCTTAGACTT	0	0	0	0	0	0	0	0	0	0	0	0	0	0	0	0	0	2	0	0	0	0	0	0	0	0	0	0	0	0	0	0	0	0	0	0	0	0
OTU_1907	Arthropoda	Branchiopoda	Ctenopoda	Sididae	Sida	Sida crystallina	99.5	Published	GCTATCTAGGACTATTGCCCATGCTGGGGCGGCGGTAGATTTAAGAATTTTCTCATTACACTTAGCGGGAATTTCTTCCATCTTAGGGGCAGTAAATTTTATTACTACTATTATCAATATACGCTCCCAAGGTTTAACTTTAGATCGAATCCCCTTATTCGTCTGGGCTGTCGGGATTACGGCACTTTTACTTCTTTTGAGACTT	0	0	0	0	0	0	0	0	0	1	0	0	0	0	0	0	0	0	0	0	0	0	0	0	0	0	0	0	0	0	0	0	0	0	0	0	0	0
OTU_1247	Arthropoda	Branchiopoda	Anomopoda	Chydoridae			94.12	Private	TCTTTCAGCTGGAATTGCTCATGCAGGTGCATCGGTTGACTTAAGTATTTTTTCTTTGCATTTAGCTGGTATTTCTTCTATTTTAGGGGCTGTAAATTTTATTACTACTGTGATTAATATACGTTCGTACGGAATAAGTTTAGATCGAATTCCTTTATTTGTTTGAGCTGTAGCAATTACAGCTTTACTTTTATTGCTCAGTCTT	0	0	0	0	0	0	10	0	0	0	0	0	0	0	0	0	0	0	0	0	0	0	0	0	0	6	0	0	0	0	0	0	0	0	0	0	0	0
OTU_2876	Arthropoda	Branchiopoda	Anomopoda	Bosminidae	Bosmina		95.02	Private	CTTATCCTCTGGGGTTGCTCATGCTGGTGCTTCGGTCGATCTTAGAATTTTTTCTTTACATTTGGCGGGTATTTCTTCAATTCTAGGGGCCGTAAATTTTATTACTACAATTATTAATATACGAAGAGAGGGGATGACTCTTGATCGTCTAACTCTTTTTGTTTGGGCTGTCGGTCTGACGGCTTTACTTCTTCTTCTCAGTCTT	0	0	0	0	0	0	0	1	0	0	0	0	0	0	0	0	0	0	0	0	0	0	0	0	0	0	2	0	0	0	0	0	0	0	0	0	0	0
OTU_1804	Arthropoda	Chilopoda	Lithobiomorpha	Henicopidae	Lamyctes	Lamyctes africanus	100	Private	TCTAGCAGCAGGAATATCCCATAGAGGGGGATCTGTAGATATAACAATTTTTTCTCTGCACCTAGCAGGTATTTCCTCAATTTTAGGGGCAATCAATTTCATTACAACAATTATTAATATACGGACAAGAGGAATAATTTTCGAGCGTATACCTTTGTTTGTTTGAGCAGTTAAAATCACAGCTATTCTGCTATTACTTTCCTTA	0	0	0	0	0	0	0	0	0	1	0	0	0	0	0	0	0	0	0	0	0	0	0	0	0	0	0	0	0	0	0	0	0	0	0	0	0	0
OTU_3640	Arthropoda	Chilopoda	Lithobiomorpha	Lithobiidae	Lithobius	Lithobius curtipes	99.51	Private	ATTATCCTCAAATATTTCCCATAGCGGAGCATCAGTTGACATAACAATTTTTTCCCTACACCTCGCAGGTGTATCCTCTATTTTAGGGGCTATTAACTTCATTTCAACAATTATTAACATACGCTCAAGAGGAATATCATTTGAACGAGTACCCCTATTTGTTTGGTCAGTAAAAATTACAGTAATTCTTCTACTTCTATCACTC	0	0	0	0	0	0	0	0	0	0	0	0	0	0	0	0	0	0	0	2	0	0	0	0	0	0	0	0	0	0	0	0	0	0	0	0	0	0
OTU_1068	Nematoda	Chromadorea	Rhabditida	Rhabditidae			91.75	Published	TTAAGAACTTTGGGTCACCCTGGTAGAAGAGTGGATTTGGCTATTTTTAGTTTACATTGTGCTGGTGTAAGATCAATTTTAGGTGGTATTAATTTTATGTGTACAACTAAAAATTTACGTAGTAGTTCAATTTCTTTAGAACATATAAGTTTATTTGTATGAACTGTTTTTGTTACTGTATTTTTGCTTGTTCTTTCTTTA	0	0	0	0	0	0	0	0	0	0	0	0	0	0	0	13	0	0	0	0	0	0	0	0	0	0	0	0	0	0	0	0	0	0	4	0	0	0
OTU_1829	Nematoda	Chromadorea	Aphelenchida				87.5	Private	TTTGAGTACTCTCGGTCACCCTGGGAGAAGAGTTGACCTTGCAATTTTTAGTCTTCATTGTGCAGGTGTTAGTTCAATTTTAGGGGGTATTAATTTTATATGTACTACAAAAAATTTACGTAGAAGGTCTATTTCATTAGAACATATGAGTTTATTTGTATGAACTGTCTTTGTTACAGTTTTTTTGTTGGTTTTATCTTTA	0	0	0	0	0	0	0	0	9	0	0	0	0	0	0	0	0	0	0	0	0	0	0	0	0	0	0	1	0	0	0	0	0	0	0	0	0	0
OTU_1990	Nematoda	Chromadorea	Rhabditida	Rhabditidae			92.04	Published	TTTAAGAACTTTGGGCCATCCTGGTAGAAGGGTTGATTTAGCTATTTTTAGTTTACATTGTGCTGGTGTAAGTTCGATTTTAGGCGGTATTAATTTTATGTGTACAACAAAAAATTTACGTAGTAGTTCTATTTCTTTAGAACATATGAGTTTATTTGTTTGAACTGTTTTTGTAACTGTTTTCTTATTGGTTTTATCTTTA	0	0	0	0	0	0	3	0	0	0	0	0	0	0	0	0	0	0	0	0	0	0	0	0	0	0	0	0	0	0	0	0	0	0	0	0	0	0
OTU_1119	Annelida	Clitellata	Crassiclitellata	Lumbricidae	Allolobophora	Allolobophora chlorotica	98.53	Published	TCTAGCAAGAAATATTGCTCATGCCGGCCCATCCGTAGACTTAGCTATCTTCTCTCTTCATTTAGCAGGTGCCTCATCAATCTTAGGAGCCATTAATTTTATCACTACTGTTATTAACATGCGATGAAGGGGCTTACGACTTGAACGAATCCCATTATTCGTTTGAGCTGTTCTAATTACAGTGGTGCTTCTACTCCTATCCTTA	0	0	0	6	3	4	5	2	6	0	0	0	0	0	0	0	0	0	0	0	10	0	0	0	0	0	0	0	0	0	0	0	0	0	1	0	0	0
OTU_212	Annelida	Clitellata	Crassiclitellata	Lumbricidae	Allolobophora	Allolobophora chlorotica	100	Private	CCTAGCAAGAAACATTGCTCATGCCGGCCCATCTGTAGACTTAGCTATTTTTTCTCTTCATTTAGCAGGTGCTTCATCAATCTTGGGTGCCATTAATTTTATTACTACTGTTATTAATATACGATGAAGAGGCTTACGACTTGAACGAATCCCATTATTCGTTTGAGCCGTACTAATTACAGTGGTCCTTCTACTCTTATCCTTA	0	50	70	31	17	9	26	17	14	36	28	8	22	24	22	16	30	25	14	43	40	10	0	0	2	8	5	0	8	12	0	10	6	3	4	12	13	4
OTU_673	Annelida	Clitellata	Crassiclitellata	Lumbricidae	Allolobophora	Allolobophora chlorotica	100	Private	CCTAGCAAGAAATATTGCTCATGCCGGTCCATCCGTAGACTTAGCTATCTTCTCTCTTCATTTAGCAGGTGCTTCATCAATCTTAGGGGCCATTAATTTTATCACTACTGTTATTAACATGCGATGAAGAGGCTTACGACTTGAACGAATCCCATTATTCGTTTGAGCCGTTCTAATTACAGTAGTGCTTCTACTCCTATCCTTA	0	0	6	4	2	0	0	5	1	8	0	0	0	2	0	0	0	1	2	0	2	9	0	0	0	0	20	0	0	0	0	0	0	0	0	0	0	0
OTU_3460	Annelida	Clitellata	Crassiclitellata	Lumbricidae	Allolobophora	Allolobophora chlorotica	99.51	Private	ACTAGCAAGAAATATTGCTCATGCCGGCCCATCCGTAGACTTAGCTATCTTCTCTCTTCATTTAGCAGGTGCTTCATCAATCTTAGGAGCCATTAATTTTATCACTACTGTTATTAACATACGATGAAGAGGCTTACGTCTTGAACGAATCCCATTATTCGTTTGAGCCGTTCTAATTACAGTGGTACTTCTACTCCTATCCTTA	0	5	0	0	1	1	3	0	0	0	0	0	0	0	0	0	0	0	0	31	2	0	3	0	0	0	0	0	0	0	0	0	0	0	0	0	0	0
OTU_4478	Annelida	Clitellata	Crassiclitellata	Lumbricidae	Aporrectodea	Aporrectodea caliginosa	100	Early-Release	CTAGCCAGAAATCTTGCACATGCTGGACCCTCAGTAGATCTAGCTATTTTTTCACTACACTTAGCTGGAGCTTCCTCTATCCTTGGAGCCATCAATTTTATCACAACAGTAATCAATATACGCTGAAGAGGCTTACGACTAGAACGAATCCCCCTATTCGTATGAGCTGTAGTAATTACAGTTGTTCTTCTCCTCCTATCCCTC	0	3	10	0	0	0	0	0	0	0	0	0	0	0	0	0	0	0	0	0	0	0	0	0	0	0	0	0	0	0	0	0	0	0	0	0	0	0
OTU_1187	Annelida	Clitellata	Crassiclitellata	Lumbricidae	Aporrectodea	Aporrectodea caliginosa	99.5	Private	CTAGCTAGAAATCTAGCACACGCTGGACCTTCAGTAGATCTGGCTATTTTCTCTCTTCACTTAGCGGGTGCATCCTCAATTCTGGGAGCCATCAACTTTATTACGACTGTAATCAACATACGTTGAAGAGGCCTACGACTAGAACGAATTCCTCTATTTGTCTGAGCTGTAGTGATTACAGTTGTACTTCTCCTTCTATCCCTC	48	5	0	1	1	0	0	1	0	0	0	0	0	0	0	0	0	0	0	0	0	0	5	0	0	0	0	0	0	0	0	0	0	0	0	0	0	0
OTU_3069	Annelida	Clitellata	Crassiclitellata	Lumbricidae	Aporrectodea	Aporrectodea rosea	99.51	Published	TCTATCAAGAAACCTGGCCCACGCTGGACCCTCTGTTGACCTAGCCATTTTCTCACTTCACCTAGCAGGGGCATCCTCGATTCTAGGAGCCCTTAACTTTATTACAACCGTTATCAATATACGATGAAGGGGCTTACGACTCGAACGAATTCCTTTATTTGTATGAGCTGTAATTATTACAGTAGTTTTACTTCTCCTTTCCCTT	0	0	0	0	0	0	0	0	0	0	0	0	0	0	0	0	0	0	0	2	0	0	0	0	0	0	0	0	0	0	0	0	0	0	0	0	0	0
OTU_4318	Annelida	Clitellata	Tubificida	Naididae	Bothrioneurum	Bothrioneurum vejdovskyanum	100	Private	CTAGCAAGAAATCTCGCACACTCCGGTCCATCAGTAGACCTGGCAATTTTCTCCCTTCATTTAGCCGGAGCATCCTCAATCCTAGGTGCTATCAACTTCATCACCACAATAATCAACATACGCTGAAACGGACTTCGACTTGAACGAATCCCTCTATTCGTCTGAGCAGCAGTAATCACAGTAATCCTACTCCTACTATCACTT	0	0	0	0	0	0	0	0	0	0	0	0	5	0	0	0	0	0	0	0	0	0	0	0	0	0	0	0	0	0	0	0	0	0	0	0	0	0
OTU_730	Annelida	Clitellata	Tubificida	Naididae	Chaetogaster	Chaetogaster cristallinus	100	Private	ACTTTCTAGGAATCTTGCACATGCAGGACCTTCAGTAGATATGGCTATTTTCTCTTTACATTTAGCAGGTGCTTCTTCAATTCTTGGAGCAGTGAACTTTATCACTACAACTATTAACATACGATGAAACGGAATACGATTAGAACGATTACCTCTATTTGTATGAGCAGTACTATTAACTGTAATTCTATTACTTCTATCATTA	0	0	0	0	0	0	0	0	3	0	0	0	0	0	0	4	4	0	0	0	0	2	0	0	0	0	0	0	0	0	0	0	0	0	18	19	0	0
OTU_4178	Annelida	Clitellata	Tubificida	Naididae	Chaetogaster	Chaetogaster diaphanus	100	Published	TCTATCAAGGAATCTTGCTCATGCAGGACCTTCAGTTGACATAGCAATTTTTTCTCTACACTTAGCAGGGGCTTCATCTATTCTAGGAGCAGTTAATTTTATTACTACAACAATTAACATGCGATGAAATGGAATACGACTAGAACGTCTACCATTATTTGTATGAGCAGTACTATTAACAGTTATTCTTCTATTACTATCACTA	0	0	0	0	0	0	0	0	0	0	0	0	0	0	0	0	0	0	0	0	0	0	0	0	0	0	0	0	0	1	0	0	0	0	0	0	0	0
OTU_1294	Annelida	Clitellata	Tubificida	Naididae	Chaetogaster	Chaetogaster diastrophus	100	Private	ACTATCAAGAAATCTTGCCCATGCAGGACCTTCGGTAGATATAGCAATTTTCTCTCTGCATTTAGCCGGTGCTTCATCTATCTTAGGGGCAGTAAATTTTATTACAACAGTCATTAACATACGATGAAATGGCATACGTTTAGAGCGACTCCCTTTATTTGTATGGGCAGTATTACTAACAGTAATTCTTTTACTTCTATCTCTT	0	0	0	0	0	0	0	0	0	2	1	0	0	13	0	0	0	0	0	0	0	0	0	0	0	0	0	0	0	0	0	0	3	0	0	0	0	0
OTU_3153	Annelida	Clitellata	Crassiclitellata	Lumbricidae	Dendrobaena	Dendrobaena veneta	100	Private	ACTAGCAAGAAATTTAGCACATGCGGGCCCCTCAGTTGATTTAGCCATTTTCTCTCTACATTTAGCAGGGGCCTCATCAATCTTAGGAGCCATTAACTTCATTACTACTGTAGTTAATATACGATGAACTGGAATACGATTAGAACGTATTCCTCTGTTCGTTTGAGCCGTAATTATTACAGTTGTTCTTCTTCTTCTCTCGCTT	0	0	0	0	0	0	2	0	0	0	0	0	0	0	0	0	0	0	0	3	0	0	0	0	0	0	0	0	0	0	0	0	0	0	0	0	0	0
OTU_4849	Annelida	Clitellata	Crassiclitellata	Lumbricidae	Eiseniella	Eiseniella tetraedra	100	Published	TTAGCAAGAAATTTAGCTCATGCAGGTCCATCAGTAGACTTAGCTATTTTCTCATTACATTTAGCAGGAGCTTCATCTATTTTAGGGGCCATCAACTTTATTACTACAGTCATCAATATGCGATGAAGAGGTTTACGATTAGAGCGAATCCCCCTTTTCGTATGAGCTGTATTAATTACAGTGATTCTTCTTCTACTATCATTG	0	0	0	0	0	0	2	0	0	0	0	0	0	0	0	0	0	0	0	0	0	0	0	0	0	0	0	0	0	0	0	0	0	0	0	0	0	0
OTU_1595	Annelida	Clitellata	Enchytraeida	Enchytraeidae	Enchytraeus	Enchytraeus buchholzi	100	Private	TTTAGCAAGAAATATTGCACACGCAGGCCCATCTGTAGATTTAGCAATTTTCTCCCTACATTTAGCAGGTGCATCATCAATTTTAGGTGCAGTAAACTTTATTACAACAGTAATTAATATACGATGACAAGGATTAACACTTGAACGAATTCCATTATTTGTATGAGCCGTAACCATTACAGTTGTTTTACTACTCTTATCACTT	0	0	3	5	0	0	0	0	0	0	0	0	0	0	0	0	0	0	0	0	0	0	0	0	0	0	0	0	0	0	0	1	0	0	0	0	0	0
OTU_1210	Annelida	Clitellata	Enchytraeida	Enchytraeidae	Enchytraeus	Enchytraeus bulbosus	100	Private	TCTAGCTAGAAATATTGCTCATGCTGGCCCATCTGTAGACTTAGCAATTTTCTCTTTACATTTAGCCGGAGCGTCATCAATTTTAGGAGCTGTTAATTTCATTACTACTGTAATTAATATGCGATGACAAGGACTAACCCTAGAACGAATTCCTTTATTTGTATGAGCCGTAACTATTACAGTAGTTCTTCTTCTTTTATCCCTT	0	0	0	0	8	0	0	0	1	6	0	0	0	0	0	0	0	0	0	0	0	0	0	0	0	0	0	1	0	0	0	0	0	0	0	0	0	0
OTU_1446	Annelida	Clitellata	Enchytraeida	Enchytraeidae	Enchytraeus	Enchytraeus bulbosus	100	Early-Release	CTTAGCCAGAAATATTGCTCATGCTGGACCATCTGTAGACTTAGCAATTTTCTCTTTACATTTAGCCGGAGCATCATCAATTCTAGGAGCCGTTAATTTCATCACTACCGTAATTAACATACGATGACAAGGACTAACCCTAGAACGAATTCCTTTATTTGTGTGAGCCGTAACTATTACAGTAGTCCTTCTTCTTTTATCACTT	0	0	0	5	0	0	1	1	0	0	4	0	0	0	0	4	0	2	0	0	0	0	1	0	0	0	0	0	2	0	0	0	0	0	0	0	0	0
OTU_2342	Annelida	Clitellata	Tubificida	Naididae	Limnodrilus	Limnodrilus hoffmeisteri	100	Published	CTTAGCAAGAAATCTAGCTCATTCCGGGCCTTCTGTAGATCTGGCAATTTTTTCACTACACTTAGCAGGAGCCGCATCAATCCTGGGAGCAATTAACTTCATCACAACAATAATCAATATACGATGAAAGGGAATACGCTTAGAGCGTATTCCTTTATTTGTGTGATCCGTAATCATCACAGTTATTTTACTTCTTCTTACCCTT	0	2	0	0	0	0	0	0	0	0	0	0	0	0	0	0	0	3	0	0	0	0	0	0	0	0	0	0	0	0	0	0	0	0	1	0	0	0
OTU_836	Annelida	Clitellata	Crassiclitellata	Lumbricidae	Lumbricus	Lumbricus rubellus	100	Published	TCTAGCTAGAAATCTCGCTCATGCGGGGCCATCAGTAGATTTAGCTATTTTCTCCCTACATCTAGCTGGAGCATCCTCTATTCTAGGAGCTATTAACTTTATTACCACTGTAATCAATATACGATGAAGGGGTCTACGGCTGGAACGAATTCCTCTATTTGTATGAGCTGTACTAATTACAGTAGTTCTCCTTCTTCTATCCCTA	121	0	0	3	0	3	2	0	0	0	1	0	0	0	0	0	0	0	0	0	0	0	0	0	0	0	1	0	0	0	0	0	0	0	0	0	0	0
OTU_1375	Annelida	Clitellata	Crassiclitellata	Lumbricidae	Lumbricus	Lumbricus terrestris	100	Private	TCTTGCCAGAAATCTCGCCCATGCCGGGCCATCTGTAGATTTAGCTATTTTTTCCCTCCATTTAGCAGGTGCGTCCTCTATTCTGGGGGCTATTAATTTTATTACCACTGTAATTAACATACGCTGAAGTGGGTTACGACTAGAGCGAATCCCTCTGTTTGTGTGAGCTGTATTAATTACAGTAGTTCTCCTCCTCCTATCCCTT	0	8	6	11	1	2	3	2	0	0	0	0	0	0	0	0	0	4	0	0	0	0	0	0	0	0	0	0	0	0	0	0	0	0	0	0	0	0
OTU_1543	Annelida	Clitellata	Crassiclitellata	Lumbricidae	Lumbricus	Lumbricus terrestris	100	Published	TCTTGCCAGAAATCTCGCCCATGCCGGGCCATCTGTAGATTTAGCTATTTTTTCCCTCCATTTAGCAGGTGCATCCTCTATTCTAGGAGCTATTAATTTTATTACTACTGTAATCAACATACGTTGAAGTGGGTTACGACTAGAACGAATCCCTCTGTTTGTCTGAGCTGTATTAATTACAGTAGTTCTCCTCCTCCTATCCCTT	0	2	0	4	0	0	0	0	1	0	4	0	0	0	0	4	4	2	0	3	0	0	0	0	0	0	0	0	0	0	0	0	0	0	0	0	0	0
OTU_1522	Annelida	Clitellata	Tubificida	Naididae	Nais	Nais christinae	100	Private	TCTATCTAGAAATCTAGCTCATGCTGGGCCTTCAGTAGATATGGCTATTTTCTCACTTCATTTAGCAGGTGCTTCTTCTATTCTTGGAGCAGTAAATTTTATTACAACTGTAATAAACATACGTTGAAACGGAATGCGATTAGAACGACTTCCATTATTTGTATGAGCAGTATTTCTTACAGTAATTCTCCTTCTTCTATCTCTC	0	0	0	4	2	0	2	0	0	0	0	0	0	0	0	0	0	0	0	4	4	1	0	0	1	0	0	0	0	0	0	2	0	0	0	0	0	0
OTU_1084	Annelida	Clitellata	Tubificida	Naididae	Ophidonais	Ophidonais serpentina	100	Private	ATTATCAAGAAATCTAGCTCACGCTGGACCTTCAGTTGACATGGCTATTTTTTCACTACATCTAGCAGGTGCATCTTCTATTTTAGGTGCAGTTAACTTCATTACTACAGTAATAAACATACGATGAAATGGAATACGACTTGAACGAGTACCATTATTTGTATGAGCTGTAACACTTACTGTAATTCTTCTTCTTTTATCATTA	0	0	0	0	1	0	0	0	0	0	0	0	0	0	1	0	4	0	0	21	0	0	0	0	0	0	0	0	0	0	0	0	1	3	0	0	0	0
OTU_1373	Annelida	Clitellata	Tubificida	Naididae	Psammoryctides	Psammoryctides barbatus	100	Private	ACTAGCTGGTAACCTCGCACACTCTGGCCCTTCTGTAGACCTGGCTATTTTCTCTCTTCACTTAGCTGGTGCCGCATCTATTTTAGGAGCCATTAATTTTATTACTACTATAATTAATATACGGTGAAAAGGTATACGATTAGAGCGAATTCCTCTATTTGTGTGGGCTGTAATCATTACAGTAATTCTTCTTTTATTAACCCTT	0	0	0	0	0	0	4	0	0	0	0	0	0	0	0	0	0	0	0	12	0	0	0	0	0	0	0	0	0	0	0	0	0	0	0	0	0	0
OTU_490	Annelida	Clitellata	Tubificida	Naididae	Stylaria	Stylaria lacustris	100	Private	TCTATCTAGAAATTTAGCACACGCTGGTCCATCAGTAGATATGGCTATTTTTTCACTTCATTTAGCAGGTGCTTCTTCTATTTTAGGAGCAGTAAATTTTATTACAACAGTAATAAATATACGATGAAATGGGATACGTCTAGAACGAGTACCATTATTTGTATGAGCTGTAACACTTACAGTAATTCTTCTTCTACTATCATTA	129	5	20	1	2	3	3	5	3	1	0	1	0	2	2	0	0	4	0	20	9	22	3	2	8	0	3	3	1	3	0	0	3	1	1	4	6	3
OTU_1912	Annelida	Clitellata	Lumbriculida	Lumbriculidae	Stylodrilus	Stylodrilus heringianus	100	Private	TCTATCAAGAAATTTAGCTCATGCAGGTCCATCAGTAGACCTAGCAATCTTTTCACTACATCTAGCTGGGGCATCCTCCATTCTAGGAGCTATTAACTTTATTACTACGGTAATTAATATACGATGAAATGGACTCCGACTTGAACGAGTTCCATTATTTGTATGAGCAGTAACAATTACAGTTGTTCTATTACTATTATCGTTA	0	0	0	0	0	0	1	0	0	0	0	0	0	0	0	0	0	0	0	0	0	4	0	0	0	0	1	0	0	0	0	0	0	0	0	0	0	0
OTU_291	Annelida	Clitellata	Tubificida	Naididae	Tubifex	Tubifex tubifex	99.51	Private	CCTAGCTAGAAATCTAGCACATTCCGGGCCCTCCGTAGACCTGGCTATCTTCTCACTACATTTAGCTGGTGTAGCATCAATTCTAGGAGCCATTAATTTCATTACCACAATAATCAATATACGCTGAAAAGGCATACGCCTAGAACGAATTCCTTTATTCGTATGATCAGTTATTATTACTGTAATCCTTCTATTACTCACACTC	0	0	0	0	0	0	0	0	240	0	0	0	0	0	0	0	0	0	0	0	0	0	0	0	0	0	0	37	0	0	0	0	0	0	0	0	0	0
OTU_4933	Annelida	Clitellata	Tubificida	Naididae	Tubifex	Tubifex tubifex	100	Published	CTTAGCCAGAAACTTAGCTCACTCTGGGCCTTCCGTAGACCTGGCTATTTTCTCGCTACACTTGGCTGGTGTAGCATCGATCTTAGGAGCCATTAATTTCATTACTACAATAATTAATATACGTTGAAAAGGTATGCGCCTAGAACGAATTCCCTTATTTGTATGATCAGTTATTATTACTGTAATCCTTCTACTACTCACGCTC	0	0	0	0	0	0	0	0	0	0	0	0	0	0	0	1	0	0	0	0	0	0	0	0	0	0	0	0	0	0	0	0	0	0	0	0	0	0
OTU_4724	Annelida	Clitellata	Tubificida	Naididae	Uncinais	Uncinais uncinata	100	Private	ACTATCAAGAAATCTAGCTCACGCTGGCCCTTCTGTAGATATGGCTATTTTTTCACTACACTTAGCTGGTGCTTCTTCTATTCTAGGAGCAGTTAATTTTATCACCACTGTAATAAATATACGTTGAAACGGAATACGACTAGAACGACTTCCACTATTTGTTTGATCAGTATTCCTTACAGTAATTCTTCTCTTATTATCTCTT	0	0	0	0	0	0	0	0	0	0	0	0	0	0	0	0	1	0	0	0	0	0	0	0	0	0	0	0	0	0	0	0	0	0	0	0	0	0
OTU_2223	Annelida	Clitellata	Tubificida	Naididae	Chaetogaster		100	Private	TCTATCTAGAAATCTTGCCCATGCAGGACCGTCCGTAGACATGGCTATTTTTTCTCTTCACTTAGCAGGTGCTTCATCTATTTTAGGAGCAGTGAATTTTATTACAACTGTAATTAACATACGATGAAACGGAATACGACTAGAACGACTTCCTCTATTTGTATGAGCAGTATTCTTAACAGTCATTCTTCTTCTACTTTCTCTT	0	0	0	0	0	0	0	0	0	0	0	0	0	0	0	0	0	0	0	0	5	0	0	0	0	0	0	0	0	0	0	0	0	0	0	0	0	0
OTU_3198	Annelida	Clitellata	Tubificida	Naididae	Chaetogaster		100	Private	ATTATCAAGAAACATTGCACATGCCGGACCTTCTGTAGATATGGCTATTTTCTCGCTACATTTAGCTGGTGCTTCATCTATTCTAGGTGCAGTTAATTTTATTACTACAGTAATTAACATACGATGAAATGGAATACGATTAGAACGAATTCCTCTATTTGTATGAGCAGTATTACTAACGGTTATCCTACTTTTATTATCTCTT	0	0	0	0	0	0	0	0	1	0	0	0	0	0	0	0	0	0	0	0	0	0	0	0	0	0	0	0	0	0	0	0	0	0	0	0	0	0
OTU_2439	Annelida	Clitellata	Tubificida	Naididae	Chaetogaster		100	Private	CCTATCAAGAAATTTAGCACATGCAGGACCCTCAGTAGATATAGCGATTTTTTCACTACATTTAGCAGGGGCATCATCAATTCTAGGAGCTGTAAACTTTATTACCACTGTAGTTAACATGCGGTGAAATGGAATGCGATTAGAACGAGTACCACTATTCGTATGAGCAGCCTTTTTAACAGTTATTCTCCTTCTACTATCATTA	0	0	15	0	0	0	3	0	0	0	0	0	0	0	0	0	0	2	0	0	0	0	0	0	0	1	0	0	0	0	0	0	0	0	0	0	0	0
OTU_2200	Annelida	Clitellata	Tubificida	Naididae	Limnodrilus		100	Published	TCTAGCTAGAAACCTAGCACATTCTGGACCATCCGTAGATCTTGCAATTTTCTCTCTTCACTTAGCGGGGGTAGCATCTATTCTAGGTGCAATTAACTTCATTACCACAATAATTAATATACGCTGAAAAGGTATACGTCTAGAACGAATTCCATTATTTGTCTGATCTGTAATTATTACAGTTATTCTTCTTCTCCTTACATTA	0	0	19	0	0	0	0	0	0	0	0	0	0	0	0	0	0	0	0	0	0	3	0	0	0	0	0	0	0	0	0	0	0	0	0	0	0	0
OTU_2731	Annelida	Clitellata	Crassiclitellata	Lumbricidae	LumbricidaeGEN		100	Published	ATTAGCAAGAAATTTAGCCCATGCAGGCCCATCTGTAGATTTAGCTATCTTCTCCTTACATTTAGCAGGGGCTAGATCCATCTTAGGAGCCATCAACTTTATTACAACAGTTATTAATATGCGATGAAGTGGATTGCGACTAGAACGAATTCCACTTTTTGTTTGAGCTGTATTAATTACAGTAATCCTCCTTCTACTATCATTA	0	0	5	0	0	0	0	0	0	0	0	0	0	0	0	0	0	0	0	0	0	0	0	0	0	0	0	0	0	0	0	0	0	0	0	0	0	0
OTU_683	Annelida	Clitellata	Enchytraeida	Enchytraeidae	Marionina		100	Published	ACTATCATCAAACATTGCTCATGCAGGCCCATCAGTCGACTTAGCTATTTTCTCACTACATTTAGCCGGTGCCTCATCAATTCTTGGAGCCATTAATTTTATTACAACAGTTATTAATATACGATGACAAGGCATACAGCTAGAACGCATTCCGCTATTTGTATGAGCAGTTACAATTACAGTTGTACTTCTTCTGTTATCCTTA	0	16	5	11	3	0	9	4	4	5	0	1	0	4	5	0	0	2	0	0	0	0	1	0	0	0	5	2	0	1	0	0	0	0	0	0	0	0
OTU_1877	Annelida	Clitellata	Enchytraeida	Propappidae	Propappus		99.51	Private	TCTATCAGCAAACATTGCCCATTCTGGACCTTCAGTTGATTTAGCAATTTTTTCATTACATTTGGCTGGGGTTTCATCTATTTTAGGTGCAATTAATTTCATTACTACAGTAATTAATATACGGTGAGAGGGGATAAAAATAAGGCGAATCTCCCTATTTGTATGATCTGTATTTATTACAGTTATTCTTCTTCTACTCTCTCTT	0	6	0	0	0	0	0	0	0	9	1	0	3	0	0	0	0	3	0	0	0	0	0	0	0	0	0	0	0	0	0	0	0	0	0	0	0	0
OTU_1218	Annelida	Clitellata	Enchytraeida				88.06	Published	CCTAGCAAGAAATATTGCCCACGCCGGACCATCTGTAGATTTAGCAATTTTTTCTCTACATCTAGCCGGGGCATCATCAATTTTAGGTGCAGTTAACTTTATCACTACAGTAATTAATATGCGATGACAAGGTTTAACCTTAGAACGTATTCCCCTATTTGTATGAGCAGTAACAATTACAGTAGTTTTACTTCTTCTATCACTT	0	0	0	0	0	0	0	2	0	0	0	0	0	21	0	0	0	0	0	0	0	0	0	0	0	0	0	0	0	0	0	0	3	0	0	0	0	0
OTU_1235	Annelida	Clitellata	Crassiclitellata				85.06	Published	ACTTTCTTCGGTCGAGTATCACTCCGGGCCGTCTGTTGATTTGGCAATCTTCAGCCTTCACTTGGCAGGTGCTTCATCAATCCTGGGAGCGATTAATTTCATCACGACTATCCTCAATAGGCGTGCTCCTGGGAGGACTATGCATCGACTACCACTCTTCTGCTGGGCGGTTCTAATCACTGCAGTCTTGCTGCTCCTCTCTCTT	22	13	4	3	2	0	0	2	1	2	1	2	2	12	5	0	1	1	1	2	0	0	0	0	0	0	0	0	0	0	0	0	0	0	0	0	0	0
OTU_2419	Annelida	Clitellata	Enchytraeida	Enchytraeidae	Enchytraeus		96.57	Private	TCTAGCCAGAAACATCGCCCATGCTGGGCCATCAGTTGACCTAGCCATTTTTTCACTACACTTAGCAGGAGCTTCCTCAATTCTAGGAGCTGTGAACTTTATCACTACTGTTATCAACATACGTTGACAAGGACTAACACTAGAACGAATCCCGCTTTTCGTTTGAGCTGTTACTATTACTGTAGTATTACTTCTTCTATCTTTA	0	8	0	0	0	0	0	0	0	0	0	0	0	0	0	0	0	0	0	0	0	0	0	0	0	0	0	0	0	0	0	0	0	0	0	0	0	0
OTU_2460	Annelida	Clitellata	Tubificida	Naididae	Pristina		96.57	Published	ACTTGCAAGAAATATTGCACATGCAGGACCGTCTGTAGACATAGCAATTTTCTCCCTTCATCTAGCGGGTGCATCATCAATCCTAGGAGCAGTAAACTTTATCTCAACTGTCCTAAACATACGAACTAAAGGAATACGACTAGAACGAATTCCTCTATTTGTATGAGCTGTATTCTTAACAGTAATCCTACTACTTCTGTCACTT	0	0	0	0	0	0	1	0	0	0	0	0	0	0	0	0	0	0	0	0	0	0	0	0	0	0	0	0	0	0	0	0	0	0	0	0	0	0
OTU_3097	Annelida	Clitellata	Enchytraeida	Enchytraeidae	Fridericia		96.57	Early-Release	TCTAGCTAGAAATATAGCACACGCAGGCCCATCAGTAGACTTAGCAATTTTCTCATTACACTTAGCCGGTGCATCTTCAATCCTAGGTGCAGTAAATTTCATTTCAACTGTAATTAATATACGCTGACAAGGACTTCAACTCGAACGAATCCCCCTATTCGTATGAGCTGTCAGTATCACAGTAGTGCTACTTCTACTCTCTCTA	0	0	0	0	0	0	0	0	0	0	0	0	0	0	0	0	0	0	0	0	0	9	0	0	0	0	0	0	0	0	0	0	0	0	0	0	0	0
OTU_3423	Annelida	Clitellata	Tubificida	Naididae			94.95	Published	TCTAGCCAGAAACTTAGCACACTCTGGCCCTTCCGTAGACCTAGCTATCTTCTCGTTACATTTAGCCGGTGTAGCATCAATCTTAGGGGCCATTAATTTCATTACCACAATAATTAATATACGTTGAAAAGGTATACGTCTAGAACGAATTCCTTTATTTGTATGATCAGTTATTATTACTGTAATCCTTCTATTACTCACGCTC	0	0	0	0	0	0	0	0	0	0	0	0	0	2	0	0	0	0	0	0	0	0	0	0	0	0	0	0	0	0	0	0	0	0	0	0	0	0
OTU_4558	Annelida	Clitellata	Enchytraeida	Enchytraeidae	Enchytraeus		96.57	Private	TCTAGCCAGAAACATCGCACATGCAGGACCATCAGTTGACCTAGCAATTTTTTCTCTTCATTTAGCAGGAGCCTCATCAATTTTAGGAGCTGTAAATTTCATCACTACAGTTATTAACATACGATGACAAGGACTTACACTAGAACGAATTCCACTGTTCGTTTGAGCAGTTACTATTACAGTAGTGTTACTACTTCTATCCTTA	0	0	0	0	0	0	0	0	0	0	0	1	0	0	0	0	0	0	0	0	0	0	0	0	0	0	0	0	0	0	0	0	0	0	0	0	0	0
OTU_4581	Annelida	Clitellata	Enchytraeida				86.27	Private	TCTTGCAAGAAACATCGCTCATGCAGGTCCTTCTGTAGATCTAGCAATTTTCTCATTACATTTAGCAGGAGCTTCTTCAATTCTAGGTGCAGTAAACTTTATTACTACTGTGATTAACATGCGCTGACAAGGTCTAACTCTAGAACGTATTCCCCTATTTGTCTGAGCAGTTACTATTACAGTAGTTTTACTACTTCTTTCTCTT	0	0	0	0	0	0	0	0	0	0	0	0	0	0	3	0	0	0	0	0	0	0	0	0	0	0	0	0	0	0	0	0	0	0	0	0	0	0
OTU_1011	Arthropoda	Collembola	Poduromorpha	Brachystomellidae	Brachystomella	Brachystomella parvula	100	Published	CCTCTCATCCAACCTTGCCCACGCCGGTAGATCTGTTGATCTATCTATTTTCAGCCTTCACTTAGCTGGAGCTTCATCAATTTTGGGAGCCGTTAACTTTATCACCACAATTATCAATATACGATCCCCAGGAATAACATGAGACCAAATTCCCTTATTCACTTGATCAGTATTTTTAACCGCTATTCTTCTTCTACTCTCTCTC	0	20	0	0	0	0	0	34	0	0	0	0	0	0	0	0	0	3	0	0	5	0	0	0	0	0	2	0	0	0	0	0	0	0	0	0	4	0
OTU_482	Arthropoda	Collembola	Entomobryomorpha	Isotomidae	Isotoma	Isotoma anglicana	99.51	Published	TCTTTCTTCAGGTATCGCGCATGCTGGGGCATCTGTGGACTTATCTATTTTTAGTTTACACTTAGCAGGAGCGTCTTCTATTTTAGGGGCTGTAAACTTTATTACAACAATTATTAATATACGAGCCGTTGGAATATCATGAGATCGAACCCCTTTATTTGTGTGGTCAGTATTTTTAACAGCAATTTTACTTTTACTATCACTT	230	36	0	0	4	0	0	4	0	0	0	0	0	0	0	0	0	0	0	94	0	0	0	0	0	0	0	0	0	0	0	0	0	0	0	0	0	0
OTU_1557	Arthropoda	Collembola	Entomobryomorpha	Isotomidae	Isotoma	Isotoma riparia	98.53	Published	ACTGTCTTCTGGGATTGCTCACGCTGGCGCTTCAGTCGATTTATCAATTTTTAGACTACACCTTGCCGGTGCCTCATCAATTTTAGGAGCTGTTAACTTTATTACAACTATCATTAATATACGAACTACAGGTATATCGTGGGATCGTACCCCTTTATTTGTGTGGTCAGTATTTTTAACCGCTATCTTACTTTTACTATCTCTG	21	0	0	0	0	0	0	0	0	0	0	0	0	0	0	0	0	0	0	15	0	0	0	0	0	0	0	0	0	0	0	0	0	0	0	0	0	0
OTU_3060	Arthropoda	Collembola	Entomobryomorpha	Isotomidae	Isotomurus	Isotomurus plumosus	100	Published	TCTATCTTCAGGAGTTGCACATGCAGGGGCTTCGGTAGACCTATCAATTTTTAGTCTTCATCTTGCTGGTGCTTCATCAATTTTAGGAGCAGTAAATTTTATTACCACTATTATTAATATGCGAACAACAGGAATAACATGAGATCGCACTCCGTTATTTGTTTGATCTGTGTTTTTAACAGCTATCCTTCTACTTTTGTCTTTA	0	0	0	0	0	0	0	4	0	0	0	0	0	0	0	0	0	0	0	0	0	0	0	0	0	0	0	0	0	0	0	0	0	0	0	0	0	0
OTU_445	Arthropoda	Collembola	Entomobryomorpha	Entomobryidae	Lepidocyrtus	Lepidocyrtus cyaneus	98.99	Published	ACTAGCTGCTGGAATCGCCCATGCCGGAGCATCAGTAGATCTTTCTATTTTTAGTCTTCATTTAGCTGGGGCTTCTTCAATTTTAGGGGCTGTAAACTTCATCACCACTATTATTAATATACGAACCCCTGGCTTGTCCTGGGACCAAACTCCGTTGTTTGTGTGATCTGTGTTCCTTACAGCAATTTTATTACTACTATCCTTG	374	25	0	0	0	0	0	0	0	0	0	0	0	0	0	0	0	0	0	107	0	0	0	0	0	0	0	0	0	0	0	0	0	0	0	0	0	0
OTU_795	Arthropoda	Collembola	Neelipleona	Neelidae	Megalothorax	Megalothorax willemi	100	Published	CCTATCCTCGAATGTCTCTCACTCCGGAGCATCAGTTGATTTAACTATTTTTAGACTTCATTTAGCCGGAATGTCATCTATTTTAGGAGCTATTAATTTTATTACTACTATTATCAATATACGCACCCCAGGAATAAGATGGGACCAAATTCCCTTATTTATTTGATCCGTGTTTATTACATCAATTCTTCTGTTATTATCCCTA	0	7	0	0	0	0	0	0	0	32	0	0	0	0	27	0	0	0	0	0	0	0	0	0	0	0	0	0	0	0	0	0	1	0	0	0	0	0
OTU_3746	Arthropoda	Collembola	Entomobryomorpha	Entomobryidae	Orchesella	Orchesella villosa	100	Private	CTTAGCCGCAGGAATCGCCCACGCTGGTGCTTCTGTAGATTTATCTATTTTTAGTCTACATCTTGCCGGGGCTTCTTCTATTTTAGGCGCAGTAAATTTTATTACTACTATTATTAACATACGAACTCCTGGGATATCCTGAGATCAAACGCCTTTATTTGTTTGATCCGTATTTTTAACAGCAATTTTACTATTATTATCCCTA	0	4	0	2	0	3	0	0	0	0	0	0	0	0	0	0	0	0	0	0	0	0	0	0	0	0	0	0	0	0	0	0	0	0	0	0	0	0
OTU_2323	Arthropoda	Collembola	Entomobryomorpha	Isotomidae	Parisotoma	Parisotoma notabilis	100	Private	TCTTTCTGCCGGAATCGCCCATGCAGGAGCATCAGTAGATTTATCTATTTTTAGTTTACATTTAGCAGGAGCTTCTTCTATCCTAGGAGCTATTAATTTTATCACCACTATCATTAATATGCGTCAAGTAGGAATAACCTGAGACCGCACACCTTTGTTTGTTTGATCTGTGTTTCTTACGACCATTCTACTTCTTTTATCCCTT	0	0	0	0	0	0	7	0	0	0	0	0	0	0	0	0	0	0	0	0	0	0	0	0	0	0	0	0	0	0	0	0	0	0	0	0	0	0
OTU_409	Arthropoda	Collembola	Symphypleona	Katiannidae	Sminthurinus	Sminthurinus elegans	100	Private	CCTATCTTCTACACTATCACACACAGGAGCTTCAGTGGACTTGACTATTTTTAGTTTACACTTAGCAGGTGTTTCTTCAATTCTAGGGGCAATTAATTTCATTACTACAATTATCAATATACGAACACCCGGTATGAGATGAGATCGAACACCTTTATTTGCTTGGTCTGTAATTATCACAGCAATTTTATTGCTTCTTTCCCTC	181	114	64	0	0	0	12	1	0	0	2	0	2	0	0	1	0	0	0	141	65	23	0	0	0	2	1	0	0	0	0	0	0	0	0	0	0	0
OTU_2610	Arthropoda	Collembola	Entomobryomorpha	Tomoceridae	Tomocerus	Tomocerus minor	100	Published	ACTATCAGCAGGTATCGCACATGCAGGAGCTCGGTTGACTTATCAATTTTTAGCCTACATTTAGCAGGAGCGTCTTCTATTTTAGGTGCAGTAAACTTTATTACAACTATTATTAATATACGAACACCTGGAATAGACTGAGATAAAACACCTTTATTTGTATGATCCGTTTTTTTAACTGCCATTCTTCTTCTTCTTTCACTT	0	0	0	5	1	0	0	0	0	0	0	0	0	0	0	0	0	0	0	0	0	0	0	0	0	0	0	0	0	0	0	0	0	0	0	0	0	0
OTU_995	Arthropoda	Collembola	Poduromorpha	Hypogastruridae	Xenylla	Xenylla mediterranea	100	Published	TCTAGCCGCAGGGATCGCCCATGCCGGAGGATCAGTTGACTTATCAATCTTTAGCCTCCACTTGGCAGGGGCTTCTTCTATCTTAGGAGCTGTGAACTTCATTACTACTATTATTAATATACGAGCCCCTGGAATATCATGAGACCAAACACCATTATTTGTTTGGTCTGTATTTCTTACCGCCATCCTACTTCTTCTGTCTTTA	24	34	0	0	0	1	0	1	3	12	2	1	0	0	0	0	3	0	0	0	9	0	0	0	0	0	0	1	2	0	0	0	0	0	0	2	0	0
OTU_135	Arthropoda	Collembola	Entomobryomorpha	Isotomidae	Desoria		99.02	Private	GCTGTCTTCTGGAGTAGCTCATGCAGGAGCTTCAGTAGACCTTTCTATTTTTAGTCTTCACCTAGCGGGAGCTTCTTCCATTTTAGGAGCTGTAAATTTTATCACAACAATTATTAACATGCGGACTGCTGGAATAACTTGAGACCAAACTCCTCTTTTTGTATGATCTGTATTTTTAACAGCAATTTTACTTCTTTTATCCCTA	0	8	5224	16	0	1	0	2	0	0	2	0	0	0	0	0	0	0	0	0	0	1357	0	0	0	0	0	0	0	0	0	0	0	0	0	0	0	0
OTU_366	Arthropoda	Collembola	Symphypleona	Bourletiellidae	Deuterosminthurus		100	Published	TCTTTCTACTACTTTATCTCACTCAGGAGGATCTGTTGATTTATCAATTTTTAGTTTACACTTAGCAGGAGTTTCATCAATCTTAGGGGCCATTAACTTTATTACAACTATTATTAATATACGTTCCCCTGGTATAACTTGAGACCAAACACCACTATTCGTTTGATCAGTATTCTTAACAGCAATTTTATTATTATTATCTTTA	33	16	0	1	0	0	0	41	0	0	3	0	0	0	0	0	0	0	0	33	32	0	0	0	0	0	112	0	0	9	0	0	0	0	0	0	0	0
OTU_3071	Arthropoda	Collembola	Symphypleona	Katiannidae	Sminthurinus		100	Published	TCTATCTTCTACATTATCACATACAGGAGCCTCAGTGGACTTAACTATTTTTAGTTTACACCTAGCGGGTGTTTCTTCAATTCTAGGGGCAATTAACTTCATTACTACAATTATTAATATACGAACACCCGGTATGAGATGAGATCGAACGCCTTTATTTGTTTGGTCTGTAATTATTACAGCAATTTTATTACTTCTTTCCCTT	0	4	0	0	0	0	0	0	0	0	0	0	0	0	0	0	0	0	0	0	0	0	0	0	0	0	0	0	0	0	0	0	0	0	0	0	0	0
OTU_30	Arthropoda	Collembola	Entomobryomorpha				85.07	Early-Release	ATTATCAGCAGGGATCGCCCATGCAGGAGCCTCAGTTGATTTATCAATTTTCAGTTTACACCTCGCAGGTGCTTCTTCAATCCTTGGGGCAGTTAATTTTATCACTACAATTATTAACATACGAACATCAGGCATAACCTGAGACCGAACCCCCCTATTCGTATGATCGGTATTCTTAACAGCAATTTTACTTCTTCTTTCATTA	184	18509	834	1	1	10	0	2151	8587	0	981	35	0	1	0	0	0	0	0	28	4725	83	0	0	0	0	208	1554	0	35	0	0	0	0	0	0	0	0
OTU_62	Arthropoda	Collembola	Entomobryomorpha	Isotomidae			100	Published	TCTATCGGCAGGTATCGCCCATGCTGGGGCTTCAGTTGATTTATCAATTTTCAGCCTTCATTTAGCGGGGGCCTCATCAATTTTAGGGGCCGTAAATTTTATTACCACAATTATTAATATACGAACAGCTGGAATAACATGAGACCGCACACCTCTATTTGTGTGGTCAGTATTTTTAACAGCTATCCTTCTCCTACTTTCTCTC	0	0	0	0	0	0	0	0	317	2	0	1698	0	0	0	0	0	0	0	0	0	0	0	0	0	0	0	108	0	0	341	0	0	0	0	0	0	0
OTU_616	Arthropoda	Collembola	Symphypleona	Sminthuridae			99.49	Published	ACTGTCTTCATCCATTGCACATTCAGGGGCCTCGGTAGACTTAACTATTTTTAGATTACATCTAGCTGGTGTTTCTTCTATTTTAGGTGCCATTAATTTTATTACTACTATTATCAATATACGGGCACCAGGAATGAACTGAGATTTAACTCCATTGTTTGTTTGATCTGTGTATATTACAGCAATTTTATTACTTCTTTCCCTC	67	8	0	0	0	0	1	0	0	0	0	0	0	0	0	0	0	0	0	112	0	0	0	0	0	0	0	0	0	0	0	0	0	0	0	0	0	0
OTU_703	Arthropoda	Collembola	Entomobryomorpha	Isotomidae	Isotoma		95.1	Published	TCTTTCATCTGGTATTGCCCATGCTGGAGCTTCTGTTGATCTATCAATTTTTAGACTCCACTTAGCTGGGGCTTCTTCAATTTTGGGAGCAGTAAATTTCATTACTACGATTATTAATATACGGGCTGCAGGAATATCTTGGGATCGTACCCCTTTGTTTGTTTGATCAGTATTTTTAACTGCAATTCTGTTACTTTTATCTTTA	11	6	0	0	1	45	0	0	0	0	1	0	0	0	0	3	0	0	0	0	0	3	0	0	11	0	0	0	0	0	0	0	0	0	0	0	0	0
OTU_750	Arthropoda	Collembola	Entomobryomorpha	Isotomidae			100	Private	CCTCTCGGCAGGTATCGCCCATGCAGGAGCTTCAGTAGACCTTTCAATTTTCAGCTTACACTTAGCTGGTGCAAGCTCTATTCTAGGAGCTATTAATTTTATTACTACCATTATTAACATACGTTCCGCTGGTATAACTTGAGACCGCACTCCTTTATTCGTTTGGTCTGTATTTTTAACGGCTATTTTGTTACTCTTATCCCTT	0	0	357	0	0	0	0	0	0	0	0	0	0	1	0	0	0	0	0	0	0	30	0	0	0	0	0	0	0	0	0	0	0	0	0	0	0	0
OTU_940	Arthropoda	Collembola	Symphypleona	Dicyrtomidae			93.53	Published	CCTAGCCTCTAACGTAAGCCATGCAGGAGGCTCAGTAGACCTGTCAATCTTTAGCCTACACTTAGCAGGTGTGTCCTCAATTCTAGGTGCCATCAATTTTATTACAACAATTATTAACATACGAACAACCGGAATAACTTGAGATCGAACACCTCTATTTGTGTGGTCAGTTTTTTTAACCGCTATTCTCCTACTTCTATCACTT	0	0	0	0	0	0	0	0	0	51	34	0	0	0	0	0	0	0	0	0	0	0	0	0	0	0	0	0	0	0	0	0	0	0	0	0	0	0
OTU_960	Arthropoda	Collembola	Entomobryomorpha	Isotomidae	Desoria		96.52	Private	CCTGTCTTCTGGAGTAGCTCACGCAGGAGCTTCAGTAGATCTTTCTATTTTTAGTCTTCACCTAGCAGGAGCTTCTTCTATTTTAGGAGCTGTAAATTTTATCACAACAATTATTAACATGCGAACTGCTGGAATAACTTGAGACCGAACTCCTCTTTTTGTATGATCTGTATTTTTAACAGCAATTTTACTTCTTTTGTCCCTA	0	0	319	0	0	0	0	0	3	0	0	0	0	0	0	0	0	0	0	0	0	0	0	0	0	0	0	0	0	0	0	0	0	0	0	0	0	0
OTU_1447	Arthropoda	Collembola	Entomobryomorpha	Isotomidae	Desoria		96.52	Private	GTTGTCTTCTGGAGTAGCTCACACAGGAGCTTCAGTAGACCTTTCTATTTTTAGTCTTCACCTAGCGGGAGCTTCTTCTATTTTAGGAGCTGCAAATTTTATCACAACAATTATTAACATGCGGACTGCTGGAATAACTTGAGACCGAACTCCTCTTTTTGTATGATCTGTATTTTTAACAGCAATTTTACTTCTTTTGTCCCTA	0	0	124	0	0	0	0	0	0	0	0	0	0	0	0	0	0	0	0	0	0	0	0	0	0	0	0	0	0	0	0	0	0	0	0	0	0	0
OTU_2087	Arthropoda	Collembola	Entomobryomorpha				88.73	Published	CCTTGCTTCTGGCATCGCACACGCTGGGGGGTCTGTCGACTTATCTATTTTTAGCCTACATTTAGCGGGGGCATCCTCTATTTTAGGGGCTGTTAATTTTATTACCACAATCATTAATATACGAACTCCTGGACTCTCTTGAGACCAAACCCCACTATTTGTTTGGTCTGTTTTCCTAACAGCTATTCTTCTTCTTCTCTCCCTC	5	10	0	0	0	1	5	0	0	0	0	0	0	0	0	0	0	0	0	0	0	0	0	0	0	0	0	0	0	0	0	0	0	0	0	0	0	0
OTU_2199	Arthropoda	Collembola	Symphypleona	Katiannidae			92.09	Published	TCTTTCTTCTACACTATCTCATTCAGGAGCTTCAGTAGATCTGACAATTTTTAGACTTCATTTAGCCGGTGTATCTTCTATTCTAGGGGCTATTAATTTCATCACCACTATTATTAATATACGAACACCTGGTATAACATGAGATCGGACACCTTTATTTGTATGATCCGTTATTATTACTGCTGTGTTACTACTCTTATCGTTA	0	0	0	0	0	0	1	0	0	0	0	0	0	0	0	0	0	0	0	0	0	0	0	0	0	0	0	0	1	0	0	0	0	0	0	0	0	0
OTU_3112	Arthropoda	Collembola	Symphypleona	Bourletiellidae	Bourletiella		97.66	Published	ACTGTCGACAACTATTTCTCACTCTGGAGGTAGTGTAGACTTATCTATCTTTAGTCTTCATCTAGCAGGTGTTTCATCAATCTTAGGAGCAATTAATTTTATTACTACGATCATTAACATACGGTCACCAGGAATAACATGGGATCAAACACCCCTATTTGTTTGATCAGTGTTTTTAACAGCAATTCTACTTATTCTATCGCTT	0	0	11	0	0	0	0	0	0	0	0	0	0	0	0	0	0	0	0	0	0	0	0	0	0	0	0	0	0	0	0	0	0	0	0	0	0	0
OTU_3163	Arthropoda	Collembola	Symphypleona	Katiannidae	Sminthurinus		100	Published	TCTATCTTCTACATTATCTCATTCAGGGGCTTCAGTAGACCTTACAATCTTTAGACTTCATTTAGCTGGGGTATCTTCTATCCTAGGGGCTATTAACTTCATCACGACTATTATTAATATGCGAACACCTGGTATGACATGAGATCGGACACCTTTATTTGTATGATCTGTTATTATTACTGCTGTACTACTACTACTGTCTTTA	0	0	0	0	0	0	0	0	0	0	0	0	0	0	0	0	0	0	0	0	0	0	0	0	0	0	2	0	0	0	0	0	0	0	0	0	0	0
OTU_4407	Arthropoda	Collembola	Neelipleona				88.06	Published	CCTAGCCTCAAACATCTCTCATGCAGGAGCTTCAGTTGACCTATCTATTTTTAGCCTACACTTAGCAGGGGTATCCTCCATTCTAGGGGCGATTAATTTCATTACCACTATTATTAACATACGAACCCCAGGGATAACCTGAGACCGGACCCCCCTATTTGTCTGATCAGTTTTAATCACTGCCATCCTACTACTCCTGTCTCTT	0	0	0	0	0	0	0	0	2	0	0	0	0	0	0	0	0	0	0	0	0	0	0	0	0	0	0	0	0	0	0	0	0	0	0	0	0	0
OTU_1182	Arthropoda	Copepoda	Cyclopoida	Cyclopidae	Acanthocyclops	Acanthocyclops americanus	100	Private	CTTAAGAAGAAATATCTCTCATGGGGGTGCTTCTGTTGATTACGCTATTTTTTCTCTGCATTTAGCCGGGGTTTCTTCTATTTTAGGGGCTGTAAATTTTATTAGAACTTTAGGAAATATGCGTACATTCGGTATGTTTTTAGATCGCATGCCTCTATTTGCTTGGGCTGTGCTTATTACAGCAATTTTACTGCTTTTATCTTTA	4	5	0	0	1	3	0	3	2	0	4	0	2	1	3	0	1	1	0	3	3	0	0	1	1	0	2	1	2	2	0	1	3	4	3	0	1	0
OTU_1451	Arthropoda	Copepoda	Cyclopoida	Cyclopidae	Acanthocyclops	Acanthocyclops robustus	100	Published	ATTAAGAAGAAATATTTCTCATGGAGGGGCCTCAGTAGACTATGCTATTTTTTCTCTTCATTTAGCTGGGATTTCTTCAATTTTAGGAGCAGTAAATTTTATTAGTACTTTAGGAAATATGCGAACGTTTGGAATATTTTTAGATCGTATACCACTTTTTGCCTGAGCAGTTTTAATTACGGCTATTTTGCTTCTTCTATCTTTA	0	17	0	0	0	0	0	0	1	0	0	0	0	0	0	0	0	0	0	0	8	0	0	0	0	0	0	4	0	0	0	0	0	2	0	0	0	0
OTU_2512	Arthropoda	Copepoda	Cyclopoida	Cyclopidae	Eucyclops	Eucyclops serrulatus	100	Published	TCTTAGAAGAAACTTAGCTCACGGAGGAGCCTCTGTAGACTTTGCTATTTTTTCTTTACATTTAGCAGGGGTATCTTCTATTTTAGGAGCTGTAAATTTTATTAGTACTCTAGGCAACCTGCGTTCTTTGGGTATTTCAATAGATCGGGTTCCTCTGTTTGGCTGATCTGTCTTAATTACAGCCGTTCTTTTATTACTATCACTA	0	0	0	0	0	0	0	0	0	4	0	0	0	0	0	0	0	0	0	0	0	0	0	0	0	0	0	0	0	0	0	0	0	0	0	0	0	0
OTU_1198	Arthropoda	Copepoda	Calanoida	Diaptomidae	Eudiaptomus	Eudiaptomus gracilis	100	Private	TCTTTCCAGAAATATTGCTCATGCCGGCAGGTCTGTAGATTTTGCTATTTTTTCTTTACACCTAGCTGGGGTAAGCTCTATTTTAGGGGCGGTAAATTTTATTAGGACCTTGGGAAACTTGCGAGCTTTTGGGATAATTTTAGACCGCATGCCTCTTTTTGCTTGGGCTGTACTAATTACTGCAGTTTTATTGTTATTGTCTTTA	0	0	0	0	0	0	0	0	0	0	14	0	11	0	0	0	0	0	0	0	0	0	0	0	0	0	0	0	0	0	0	3	0	0	0	0	0	0
OTU_219	Arthropoda	Copepoda	Calanoida	Temoridae	Eurytemora	Eurytemora velox	100	Published	ACTGTCTAGAAACATCGCTCACGCGGGGAGGTCCGTAGACTTTGCTATTTTCTCGTTACATTTGGCTGGGGTTAGGTCTATTTTAGGAGCCGTCAATTTTATCAGGACTTTGGGCAATCTCCGTGTATTTGGTATAGTCTTAGATCGTATGCCTCTTTTTGCTTGGTCTGTCCTTATCACCGCAGTATTGCTTTTATTATCCCTT	0	42	0	11	7	0	16	0	7	0	30	15	0	0	16	33	30	8	10	0	17	0	1	2	0	5	0	18	0	22	20	0	5	14	39	24	9	7
OTU_129	Arthropoda	Copepoda	Cyclopoida	Cyclopidae	Mesocyclops	Mesocyclops leuckarti	99.51	Published	CTTAAGAAGAAACTTATCTCACTCTGGGTCTTCGGTAGATTATGCTATTTTTTCCCTTCATTTAGCGGGTGTGTCTTCTATTCTAGGGGCAGTTAACTTTATTAGTACAATTGGTAATATGCGGACCTTAGGGATATTTTTAGATCGTACACCTTTATTTGCCTGAGCGGTTTTAATCACTGCTATTTTGCTTTTATTGTCTCTA	0	0	0	0	528	0	0	0	0	0	0	0	0	0	0	148	0	154	123	0	0	0	0	72	0	0	0	0	0	0	0	0	1	25	39	0	24	36
OTU_936	Arthropoda	Copepoda	Calanoida	Diaptomidae	Skistodiaptomus	Skistodiaptomus pallidus	100	Published	GTTATCCAGTAATATCGCCCATGCTGGCAGTTCCGTGGATTTTGCTATTTTTTCATTACATTTAGCCGGAGTGAGCTCAATTCTTGGAGCTGTAAACTTTATTAGAACTCTAGGAAATTTGCGAGTGTTTGGAATAATTTTAGACCGAATACCACTCTTTGCTTGAGCTGTTTTAATCACCGCGGTTTTACTACTTTTATCTTTA	0	131	0	0	0	0	0	0	0	0	0	0	0	0	0	0	0	0	0	0	23	0	0	0	0	0	0	0	0	0	0	0	0	0	0	0	0	0
OTU_3049	Arthropoda	Copepoda	Cyclopoida	Cyclopidae	Thermocyclops	Thermocyclops crassus	100	Private	CTTGAGAAGGAATATGTCGCATTCTGGTTCTTCAGTGGACTACGCTATTTTTTCCTTGCATTTAGCAGGAGTTTCATCAATTTTAGGGGCAGTTAATTTTATTAGGACCCTAGGAAACATACGAACACTGGGCATATTTTTAGATCGGACCCCTTTATTTGCCTGAGCAGTGTTGATTACGGCCATTTTACTTCTTTTATCACTA	0	0	0	0	0	0	0	0	0	0	0	0	0	0	0	0	1	0	1	0	0	0	0	0	0	0	0	0	0	0	0	0	0	0	0	0	0	0
OTU_128	Arthropoda	Copepoda	Cyclopoida	Cyclopidae	Thermocyclops	Thermocyclops oithonoides	99.02	Published	TTTAAGGAGAAATTTATCTCATTCAGGGTCTTCAGTAGACTACGCGATTTTCTCTTTGCATCTTGCTGGGGTTTCTTCTATTTTAGGGGCTGTTAATTTTATTAGAACCCTAGGAAATATACGAACACTAGGAATGTTTTTAGATCGAACTCCCCTATTTGCTTGAGCCGTTTTAATCACCGCAATTTTACTGCTCCTTTCCTTG	0	0	0	0	0	86	0	223	0	0	0	86	0	0	0	63	0	272	0	0	0	0	0	0	9	0	39	0	0	0	19	0	74	0	13	0	64	0
OTU_1344	Arthropoda	Copepoda	Cyclopoida	Cyclopidae			94.51	Published	TTTAAGGAGAAATTTATCTCATTCAGGGTCTTCAGTAGACTATGCGATTTTCTCTTTGCATCTTGCTGGGGTTTCTTCTATTTTAGGGGCCATTAATTTTATTAGAACCCTAGGAAATATACGAACACTAGGAATGTTTTTAGATCGAACTCCTCTATTTGCTTGAGCTGTTTTAATCACTGCAAAATACTACTCCTCTCCTTG	0	0	0	0	0	3	0	5	0	0	0	5	0	0	0	1	0	2	0	0	0	0	0	0	0	0	0	0	0	0	0	0	0	0	0	0	0	0
OTU_2774	Arthropoda	Copepoda	Calanoida	Diaptomidae			93.63	Published	GCTATCTAGTAATATCGCCCATGCTGGAAGTTCCGTGGATTTTGCTATTTTTTCATTACATTTAGCCGGAGTGAGCTCAATTCTTGGAGCTGTAAACTTTATTAGAACTTTAGGAAATCTACGAGTATTCGGAATAATTTTAGACCGAATACCTCTCTTTGCTTGGGCTGTTTTAATTACCGCGGTCTTGCTACTTTTATCTCTA	0	14	0	0	0	0	0	0	0	0	0	0	0	0	0	0	0	0	0	0	0	0	0	0	0	0	0	0	0	0	0	0	0	0	0	0	0	0
OTU_1032	Porifera	Demospongiae	Spongillida	Spongillidae	Ephydatia	Ephydatia fluviatilis	100	Private	TTTAGCAGGCATACAAGCGCATTCTGGGGGATCGGTTGATATGGCAATATTTAGTCTTCACTTGGCGGGTATTTCTTCGATATTAGGGGCTATGAATTTTATCACCACAATCTTTAATATGAGAGCGCCCGGTATTACAATGGATAGACTGCCATTATTTGTATGATCTATTTTAATAACAGCCTTTTTATTATTATTATCTTTA	50	13	16	7	0	1	1	1	1	2	2	0	2	1	5	0	2	1	0	0	1	0	0	0	0	0	0	0	0	0	0	0	0	0	0	0	0	0
OTU_771	Nematoda	Enoplea	Triplonchida				85.29	Private	TTTATCTTCTAATATAGGGCATAGTGGGAGATCAGTTGATCTTGCTATTTTTAGTCTTCATTTAGCTGGTGCTTCTTCAATTATAGGTTCAATTAATTTTATTAGAACAATTCTTAATATACGTTCAAATGGTATAACTATAGAACGAGTTTCTTTATTTGTTTGAAGAGTTGGTATTACAACATTTTTATTAGTTTTATCTTTA	0	0	0	0	0	0	0	0	0	0	0	0	0	0	0	14	0	0	0	0	0	0	0	0	0	0	0	0	0	0	0	0	0	0	12	0	0	0
OTU_2588	Tardigrada	Eutardigrada	Parachaela	Hypsibiidae	Isohypsibius		96.57	Published	ACTATCGTCCTACTTTGCCCACAGAGGTCCTGCTGTAGACTTAACAATTTTCTCGTTACACTTAGCCGGAATTTCTTCAATTTTGGGGGCTATTAATTTCATTTCAACTATTATAAATATGCGAAGTCCTTCAATAAAAATAGAACAAATACCTTTATTTGTTTGATCTGTTCTAATTACCGCTATTTTATTACTCTTATCCCTA	0	0	0	0	0	0	5	0	0	0	0	0	0	0	0	0	0	0	0	0	0	0	0	0	0	0	0	0	0	0	0	0	0	0	0	0	0	0
OTU_1756	Mollusca	Gastropoda	Pulmonata	Ancylidae	Ancylus	Ancylus fluviatilis	100	Private	TTTAAGAGGATCTATTGCTCATAGTGGTGCTTCTGTTGATTTAGCAATTTTTTCGTTACATTTAGCTGGGATATCATCTATTTTAGGTGCAATTAATTTTATTACAACGATTTTTAATATACGTGCTCCTGGAATTACTATGGAACGTCTTTCCTTATTTGTTTGATCAATTTTAATTACAGCGTTTTTATTATTATTATCGTTA	0	0	0	1	0	0	1	0	0	0	0	0	0	0	0	0	0	0	0	0	1	2	0	0	0	0	0	0	0	0	0	2	0	0	0	0	2	0
OTU_1418	Mollusca	Gastropoda	Stylommatophora	Agriolimacidae	Deroceras	Deroceras reticulatum	100	Private	TTTAAGAGGGCCATTAGGTCATGCTGGGGCATCTGTGGATTTAGCTATTTTCTCATTACATTTAGCAGGGATGTCTTCTATTTTAGGTGCTATTAATTTCATTACTACAATTTTTAATATACGGTCACCTGGGATGAGAATAGAACGTTTAAGATTATTTGTTTGATCAATTTTAGTTACTGTGTTTTTACTTTTATTATCTTTA	0	7	7	1	0	0	3	0	0	0	0	0	0	0	0	1	0	0	0	5	0	0	0	0	0	0	0	0	0	0	0	0	0	0	0	0	0	0
OTU_2067	Mollusca	Gastropoda	Hygrophila	Lymnaeidae	Galba	Galba truncatula	100	Early-Release	TTTAAGCGGACCTATTGCCCATGGCGGGTCTTCAGTTGACTTAGCTATTTTTTCTCTACATTTAGCAGGTCTTTCTAGTATTTTAGGTGCTATTAATTTTATTACTACAATTTTCAACATACGATCGCCCGGAATTACTTTAGAACGAATAAGGTTATTTGTGTGATCTGTTTTAGTTACTGCTTTTCTTTTACTTTTATCTTTA	0	0	0	7	1	1	0	0	0	4	0	0	0	0	0	0	0	0	3	0	1	0	0	0	0	0	0	0	0	0	0	0	0	0	0	0	0	1
OTU_198	Mollusca	Gastropoda	Stylommatophora	Hygromiidae	Monacha	Monacha cartusiana	100	Private	ACTAAGGTCTCTTGTAGGTCATAGAGGTGCTTCAGTAGACCTAGCTATTTTTTCATTACATTTGGCGGGTATATCTTCCATTTTAGGGGCTATTAACTTTATTACTACAATTTTTAATATACGTTCTCCAGGGTTAAGTTTAGAACGAATAAGCCTATTTGTTTGGTCTATTTTAATTACAGTGTTTTTACTGTTACTTTCATTG	206	166	150	52	17	13	61	38	22	74	24	18	38	39	20	24	22	11	14	79	23	38	10	2	0	16	9	2	13	1	0	0	0	2	6	6	3	2
OTU_1468	Mollusca	Gastropoda		Physidae	Physella	Physella acuta	100	Private	TCTATCAGGACCTGTAGCTCACTCTGGTTCATCAGTAGATCTTGCTATTTTCTCATTACACTTAGCTGGGTTATCATCTATTCTAGGTGCTATTAATTTTATTACTACGATTTTTAATATACGTTCTCCTGGTATTACACTGGAACGAATAAGCTTATTTGTTTGATCAGTGTTAATTACTGCATTTTTATTATTATTGTCATTG	0	4	0	2	6	0	0	0	1	3	0	0	0	0	0	0	0	0	0	0	4	17	0	0	0	0	1	0	0	0	0	0	0	0	0	0	0	0
OTU_1793	Mollusca	Gastropoda	Stylommatophora	Succineidae	Succinea	Succinea putris	100	Private	TTTAAGTGGCTTAATTGGACATAGTGGAGCCTCAGTTGATTTAGCTATTTTTTCTTTGCATTTAGCAGGTATTTCTTCTATTTTAGGTGCAATTAATTTCATTACAACAATTTTTAATATGCGTCAACTTGGTATAACAATAGAACGATTAAGCTTATTTGTTTGATCTATTCTGGTAACAGTATTTCTTCTTCTTCTATCCCTT	0	7	7	3	3	0	2	0	0	0	0	0	0	0	0	1	0	0	0	0	0	0	0	2	0	0	0	0	0	0	0	0	0	0	0	0	0	0
OTU_3890	Mollusca	Gastropoda	Cycloneritida	Neritidae	Theodoxus	Theodoxus fluviatilis	100	Published	TTTGTCTGGAAATTTAGCTCATGCGGGGGGTTCTGTTGATTTAGCTATCTTTTCTTTACATTTAGCTGGTGTTTCTTCTATTTTAGGTGCTGTTAATTTCATTACTACAATTATTAATATGCGGTGACAAGGTATGCAATTTGAGCGATTGCCTTTATTTGTGTGGTCTGTAAAAATTACTGCAATTTTGTTATTATTATCTTTG	0	0	6	0	0	1	0	0	0	0	1	0	1	1	0	0	2	0	0	0	0	0	0	0	0	0	0	0	0	0	0	0	0	0	0	1	0	0
OTU_1744	Mollusca	Gastropoda	Stylommatophora	Succineidae	Oxyloma		99.51	Published	TTTAAGTAGTTTAACTGGCCATAGAGGGGCTTCTGTTGATTTGGCTATTTTTTCACTTCATTTAGCTGGAATTTCTTCAATTTTAGGGGCCATTAATTTTATTACTACAATTTTTAATATACGACAGCTTGGTATAACAATAGAACGATTAAGACTTTTTGTTTGATCTATTTTAGTTACAGTATTCCTACTTCTTCTTTCACTT	0	0	3	1	4	0	3	2	0	1	1	1	0	0	0	0	0	0	0	4	0	0	0	0	0	3	0	0	0	0	0	0	0	0	0	0	0	0
OTU_1469	Mollusca	Gastropoda	Stylommatophora	Succineidae			90.69	Published	TTTAAGTAGTTTAACTGGTCATAGAGGAGCTTCTGTAGATTTAGCTATTTTTTCACTTCATTTAGCTGGGATTTCATCTATTTTAGGATCTATTAATTTTATTACTACAATTTTTAATATACGACAGTTAGGTATAACAATAGAACGATTAAGTCTTTTTGTCTGATCTATTTTAGTTACTGTATTTTTACTTCTTTTATCACTT	35	0	4	0	0	0	0	0	0	0	0	0	0	0	0	0	0	0	0	0	0	0	0	0	0	0	0	0	0	0	0	0	0	0	0	0	0	0
OTU_4155	Mollusca	Gastropoda	Stylommatophora	Succineidae	Oxyloma		95.59	Published	TTTAAGTAGTTTAACTGGTCATAGGGGGGCTTCTGTTGATCTAGCTATTTTTTCACTTCATTTAGCTGGAATTTCTTCAATTTTAGGAGCCATTAATTTTATTACTACAATTTTTAATATACGACAGCTGGGTATAACAATAGAACGATTAAGACTTTTTGTTTGATCTATTTTGGTTACAGTATTCTTACTACTTCTCTCACTT	0	0	0	0	0	0	0	0	0	3	0	0	0	0	0	0	0	0	0	0	0	0	0	0	0	0	0	0	0	0	0	0	0	0	0	0	0	0
OTU_2319	Cnidaria	Hydrozoa	Anthoathecata	Oceaniidae	Cordylophora	Cordylophora caspia	100	Private	ACTATCATCTGCACAAGCACATTCTGGACCTTCTGTAGACATGGCTATATTTAGTCTACATTGCGCAGGAGCTTCTTCAATTATGGGGGCTATAAACTTTATTACAACTATTATAAACATGAGAGCTCCAGGAATGACTTTTGATAAACTTCCTTTATTTGTTTGATCAGTCTTAATCACAGCATTTTTATTATTATTATCACTA	13	4	0	2	0	0	0	0	0	0	0	0	0	0	0	0	0	0	0	0	0	0	0	0	0	0	0	0	0	0	0	0	0	0	0	0	0	0
OTU_1103	Cnidaria	Hydrozoa	Anthoathecata	Hydridae	Hydra	Hydra circumcincta	99.5	Published	TCTATCTGGGCCTCTAGCTCATTCAGGAGGGTCAGTAGATTTAGCTATATTTAGTCTTCATTGTGCTGGTTTTTCTTCAATAGCAGGAGCTATAAATTTTATTACAACTATTTTTAATATGAGAACTACAGGTTTAACATTTGATAAACTACCTTTATTTGTATGATCTATACTAATAACAGCTTTTTTATTATTACTTTCACTA	0	9	0	1	2	3	1	0	0	0	0	0	0	0	0	0	0	0	0	0	0	0	0	6	0	0	0	0	0	0	0	0	0	0	0	0	0	0
OTU_2552	Cnidaria	Hydrozoa	Anthoathecata	Hydridae	Hydra	Hydra oligactis	100	Published	TTTATCTGGACCATTAGCTCATTCTGGGGGTTCTGTTGATTTAGCTATTTTCAGTTTACATTGTGCCGGATTTTCTTCTATTGCAGGAGCAATAAATTTTATTACAACTGTATTTAATATGAGAACACCAGGATTAACATTTGACAAACTTCCCTTATTTGTATGATCAGTATTAATTACAGCATTTTTATTACTATTATCTTTA	2	13	0	0	0	0	0	0	0	0	0	0	0	0	0	0	0	0	0	0	0	0	0	0	0	0	0	0	0	0	0	0	0	0	0	0	0	0
OTU_519	Cnidaria	Hydrozoa	Anthoathecata	Hydridae	Hydra	Hydra vulgaris	100	Published	ATTATCTGGGCCTTTAGCTCATTCAGGAGGATCTGTAGATTTAGCTATTTTTAGTCTTCATTGTGCTGGATTTTCTTCCATTGCAGGAGCAATTAATTTTATTACAACTATTTTTAATATGAGAACACCGGGTTTAACATTTGACAAACTTCCTTTGTTTGTGTGATCAGTGTTAATAACAGCATTTTTATTACTCCTTTCTTTA	239	0	52	13	7	1	12	6	1	9	3	1	8	8	4	5	3	3	2	0	0	6	0	0	0	2	0	0	0	0	0	0	0	0	0	0	0	0
OTU_1494	Arthropoda	Insecta	Hemiptera	Tingidae	Acalypta	Acalypta parvula	98.53	Private	ACTTTCCACTAATTTATCACATATAGGGTCATCAGTAGATCTAGCAATCTTCTCCTTACACCTTGCAGGTGTTTCGTCAATCTTAGGAGCTATTAACTTCATCACAACTATCATAAATATACGACCGTCAGGAATAACAATAGAAAAAACACCACTATTTGTGTGATCAGTTATAATCACTGCTATTCTATTACTTCTTTCATTA	0	0	0	0	8	0	0	0	0	0	0	0	0	0	0	0	0	0	0	0	0	0	0	0	0	0	0	0	0	0	0	0	0	0	0	0	0	0
OTU_2351	Arthropoda	Insecta	Coleoptera	Anthicidae	Anthicus	Anthicus flavipes	99.51	Private	TCTTTCTGCAAATATTGCACACAGAGGATCATCTGTAGATTTAGCTATTTTTAGATTACACCTAGCAGGTATCTCCTCAATTCTTGGAGCTGTAAATTTTATTACAACAGTAATCAATATACGACCAGTAGGAATAACCTTAGATCGAATACCACTATTTGTATGAGCTGTAGTCATTACAGCAGTTTTACTTCTACTTTCATTA	0	0	0	0	0	0	0	0	0	0	0	0	0	0	0	1	0	0	0	0	0	0	0	0	0	0	0	0	0	0	0	0	0	1	0	0	0	0
OTU_2887	Arthropoda	Insecta	Hemiptera	Aphididae	Aphis	Aphis lugentis	99.02	Published	TTTATCAAATAATATTGCTCATAACAATATTTCAGTTGACTTAACTATTTTTTCTCTTCATCTAGCAGGTATTTCATCAATCTTAGGAGCAATCAATTTTATTTGTACAATTCTTAATATAATACCCAATAATATAAAATTAAACCAAATCCCTTTATTTCCATGATCAATCCTAATTACAGCTATACTATTAATTTTATCTTTA	5	0	0	0	0	0	0	0	0	0	0	0	0	0	0	0	0	0	0	1	0	0	0	0	0	0	0	0	0	0	0	0	0	0	0	0	0	0
OTU_1094	Arthropoda	Insecta	Hemiptera	Aphididae	Aphis	Aphis oenotherae	100	Published	TTTATCAAATAATATCGCTCATAATAATATTTCAGTTGATTTAACTATCTTCTCTTTACATTTAGCAGGTATTTCATCAATTTTAGGAGCAATTAACTTTATTTGTACAATCCTAAATATAATACCAAATAATATAAAATTAAATCAAATTCCTTTATTTCCATGATCAATCCTAATTACAGCTATACTATTAATTTTATCTTTA	19	0	4	0	0	0	0	0	0	1	0	0	0	0	0	0	0	0	0	20	0	0	0	0	0	0	0	0	0	0	0	0	0	0	0	0	0	0
OTU_3959	Arthropoda	Insecta	Diptera	Asteiidae	Asteia	Asteia beata	100	Published	ACTATCTTCTATTATTGCCCATGGGGGGGCTTCTGTTGATTTAGCTATTTTTTCATTACATTTAGCAGGAATTTCTTCAATTTTAGGAGCAGTAAATTTTATTACAACCGTTATTAATATACGTGCAACAGGAATTTCATTTGATCGAATACCTTTATTTGTTTGATCAGTAGTAATTACCGCATTATTATTACTACTATCATTG	0	0	0	2	0	0	0	0	0	0	0	0	0	0	0	0	0	0	0	0	0	0	0	0	0	0	0	0	0	0	0	0	0	0	0	0	0	0
OTU_2227	Arthropoda	Insecta	Diptera	Dolichopodidae	Asyndetus	Asyndetus latifrons	100	Private	TTTATCAGCAGGAATCGCTCATGGAGGAGCTTCTGTTGACTTAGCTATTTTTTCTCTTCATTTAGCAGGTATTTCTTCTATTTTAGGAGCAGTTAATTTTATTACTACAGTAATTAATATACGATCAACAGGTATTACATTTGATCGTATACCTTTATTTGTATGATCAGTAGTTATTACCGCTATTTTACTTCTTTTATCATTA	0	0	0	0	0	0	0	0	0	0	0	0	0	0	0	0	0	0	0	0	0	0	0	0	0	0	0	0	0	0	0	0	3	0	0	0	0	0
OTU_3228	Arthropoda	Insecta	Hemiptera	Aphididae	Brachycaudus	Brachycaudus cardui	100	Published	TTTATCAAACAATATTGCACATAATAATATTTCAGTTGATTTAACTATTTTTTCTTTACATTTAGCAGGAATTTCATCAATTTTAGGAGCAATTAACTTCATTTGCACTATTTTAAATATAATACCTAATAATATAAAATTAAATCAAATCCCTCTTTTTCCATGATCAATTTTAATTACAGCCATTTTATTAATTTTATCTTTA	0	0	0	0	0	0	0	0	0	0	0	0	0	0	0	0	0	0	0	3	0	0	0	0	0	0	0	0	0	0	0	0	0	0	0	0	0	0
OTU_978	Arthropoda	Insecta	Coleoptera	Byrrhidae	Byrrhus	Byrrhus pilula	100	Published	TCTTTCTGCTAATATCGCCCATAGTGGATCATCAGTAGATTTAGCAATTTTCAGCCTACATCTTGCTGGAATCTCATCAATTCTGGGAGCAGTAAATTTTATTTCTACGGTAATCAATATACGATCACCAGGAATAACTTTTGATCAAATACCGCTATTTTCATGATCAGTTGCAATTACAGCTCTTTTACTACTTCTTTCACTT	117	0	2	3	4	1	0	0	0	0	1	0	0	0	0	0	1	1	0	0	0	1	0	0	0	0	0	0	0	0	0	0	0	0	0	0	0	0
OTU_1157	Arthropoda	Insecta	Diptera	Chaoboridae	Chaoborus	Chaoborus flavicans	100	Private	TCTTTCCTCTAATATTGCTCATGCCGGGGCTTCCGTTGATTTAGCTATTTTTTCTCTTCATTTAGCAGGAATCTCTTCTATTCTAGGAGCAATTAATTTTATCACAACAACAATTAATATACGGGCATATGGAATCTCTTTTGATCGAATACCTTTATTTGTTTGATCTGTATTCATCACAGCAATCCTTTTACTTCTTTCTCTT	0	0	0	1	0	0	1	0	0	0	0	2	0	0	0	0	1	0	0	0	0	0	0	0	0	0	0	0	0	0	0	0	0	6	0	0	0	0
OTU_2194	Arthropoda	Insecta	Diptera	Chironomidae	Chironomus	Chironomus annularius	100	Published	TCTTTCTGCAGCCATTGCTCATAGTGGGGCTTCTGTTGATTTAGCAATTTTTTCATTACATTTAGCAGGTGTTTCCTCAATTTTAGGATCTGTAAATTTTATTACTACTGTAATTAATATACGAGCAAATGGAATTACCCTTGACCGAATGCCCCTATTTGTCTGATCAGTAGTAATTACAACTGTATTGCTTTTACTATCCCTG	0	0	2	0	0	0	0	0	0	0	0	0	0	0	0	0	0	0	0	0	0	0	0	0	0	0	0	0	0	0	0	0	0	0	0	0	0	0
OTU_554	Arthropoda	Insecta	Diptera	Chironomidae	Chironomus	Chironomus cingulatus	100	Published	TCTTTCTGCGGCTATTGCTCATAGTGGGGCTTCTGTAGATTTAGCTATTTTTTCACTTCACCTTGCAGGTGTTTCTTCAATTCTAGGATCTGTAAATTTTATTACTACAGTAATTAATATGCGAGCCAACGGAATTACACTAGACCGAATACCTTTATTTGTGTGATCTGTAGTTATTACGACAGTTCTTTTACTTCTTTCGCTT	35	82	16	36	13	6	6	1	4	7	5	4	10	11	3	4	3	2	3	17	12	0	9	0	1	0	1	0	6	1	0	1	1	5	0	0	0	0
OTU_669	Arthropoda	Insecta	Diptera	Chironomidae	Chironomus	Chironomus melanescens	100	Private	CCTGTCTTCTGCTATTGCCCACAGAGGTGCCTCAGTTGATTTAGCAATCTTTTCTTTACATTTAGCGGGAATTTCATCTATTCTTGGATCAGTAAATTTCATTACAACTGTTATTAATATACGGGCTAATGGAATTACCCTAGATCGAATACCATTATTTGTTTGATCAGTTGTAATTACTACAGTTCTTTTACTTCTTTCACTT	98	36	53	12	3	3	0	6	0	9	2	1	5	6	3	1	4	0	0	0	9	21	13	0	3	2	2	0	0	0	0	0	3	0	2	0	0	0
OTU_1894	Arthropoda	Insecta	Diptera	Chironomidae	Cladotanytarsus	Cladotanytarsus atridorsum	100	Private	CCTTTCCTCAAACATTGCTCATAGCGGGGCCTCTGTTGACTTAGCTATTTTCTCTCTTCATTTAGCGGGGATTTCATCCATTCTCGGGTCAGTAAATTTTATTACAACAGCAATTAATATACGAAGAAATGGAATTACTTTAGATCGAATACCCTTATTCGTTTGATCAGTAGTAATTACCACTATTTTACTATTACTTTCTCTA	0	0	0	0	0	0	0	4	0	0	0	0	0	0	0	0	0	0	0	0	0	0	0	0	0	0	3	0	0	0	0	0	0	0	0	0	0	0
OTU_373	Arthropoda	Insecta	Diptera	Chironomidae	Cladotanytarsus	Cladotanytarsus mancus	100	Published	TTTATCTTCAAATATTGCTCATAGAGGAGCTTCTGTTGATTTAGCCATTTTTTCCCTCCACCTGGCAGGAATCTCATCTATTTTAGGATCAGTAAATTTTATTACAACAGCAATTAATATACGAAGAAACGGAATTACCTTAGATCGAATACCTTTATTTGTTTGATCTGTTGTAATTACTACTATTCTTCTCTTACTATCTCTC	390	94	48	52	21	3	6	12	5	29	8	3	10	2	2	1	0	5	1	23	1	0	3	0	0	0	1	0	0	0	0	0	0	0	0	0	0	0
OTU_4174	Arthropoda	Insecta	Ephemeroptera	Baetidae	Cloeon	Cloeon dipterum	100	Private	TTTAGCGGCTAATATTGCTCATGGAGGGTCATCAGTTGATTACGCTATTTTTTCTTTACATTTAGCTGGGGTATCTTCTATTTTAGGTGCTGTAAATTTTATTACAACAGTAATTAACATGCGTAGCCCTGGTATAACTTTAGATCGTATTCCTTTATTTGTATGATCTGTTGTAATTACTGCTGTGTTATTGCTTTTATCGCTA	0	0	0	0	0	0	0	2	0	0	0	0	0	0	0	0	0	0	0	0	0	0	0	0	0	0	0	0	0	0	0	0	0	0	0	0	0	0
OTU_1908	Arthropoda	Insecta	Diptera	Muscidae	Coenosia	Coenosia testacea	100	Private	TTTATCATCTACTATTGCTCATGGAGGAGCTTCTGTTGATTTAGCTATTTTTTCATTACATTTAGCCGGAATTTCTTCCATTTTAGGAGCTGTAAATTTCATTACTACTGTTATTAATATACGATCAACAGGAATTACTTTTGACCGAATACCTTTATTTGTATGATCAGTAGCTATTACAGCTTTATTATTATTGTTATCTTTA	0	0	0	6	0	0	0	0	0	0	0	0	0	0	0	0	0	0	0	0	0	0	4	0	0	0	0	0	0	0	0	0	0	0	0	0	0	0
OTU_4285	Arthropoda	Insecta	Diptera	Chironomidae	Corynoneura	Corynoneura coronata	100	Private	TCTTTCATCAAATATTGCTCATGCTGGAGCATCTGTTGATTTAGCAATTTTTTCTCTTCATTTAGCAGGAATTTCCTCAATTTTAGGGGCAGTAAATTTTATTACAACAGTAATTAATATACGTTCTGAAGGAATTTCATTAGATCGTATACCTTTATTTGTTTGATCAGTAGTAATTACTGCTGTTCTCCTTCTTCTATCTTTA	0	0	0	0	0	0	0	0	0	4	0	0	0	0	0	0	0	0	0	0	0	0	0	0	0	0	0	0	0	0	0	0	0	0	0	0	0	0
OTU_2559	Arthropoda	Insecta	Diptera	Sciaridae	Corynoptera	Corynoptera consumpta	100	Private	TCTATCTTCCACTCTCTCGCATTCTGGTGCATCTGTAGACCTATCTATTTTTTCGTTACACCTAGCAGGTGTCTCCTCAATTCTGGGAGCCGTTAACTTTATTTCAACCATTATTAATATACGGGCCCCAGGTATAACATTGATAAAATACCCCTTTTCGTTTGATCAGTATTAATCACTGCTATTCTTTTATTACTTTCTTTA	0	0	0	0	0	0	0	0	0	7	0	0	0	0	0	0	0	0	0	0	0	0	0	0	0	0	0	0	0	0	0	0	0	0	0	0	0	0
OTU_1934	Arthropoda	Insecta	Diptera	Chironomidae	Cricotopus	Cricotopus bicinctus	100	Published	TCTTTCTTCTGGTATTGCCCATGCAGGAGCATCGGTTGATCTAGCAATTTTTTCTTTACATTTAGCAGGAATTTCCTCAATTTTAGGGGCAGTAAATTTTATTACAACAGTAATTAATATACGGTCTGAAGGAATTACCTTAGATCGAATACCTTTATTTGTTTGATCTGTAGTAATTACTGCTGTATTACTTTTATTATCTTTA	0	0	0	0	0	0	0	0	0	0	0	0	0	3	0	0	0	0	0	0	0	0	0	0	0	0	0	0	0	0	0	0	0	0	0	0	0	0
OTU_2135	Arthropoda	Insecta	Diptera	Chironomidae	Cricotopus	Cricotopus bicinctus	100	Private	TCTTTCTTCTGGAATTGCTCATGCTGGAGCTTCAGTTGATTTAGCAATCTTTTCTTTACATTTAGCAGGTATTTCCTCTATTTTAGGAGCTGTAAATTTTATTACAACTGTAATTAATATACGGTCAGAAGGAATTACTCTAGATCGAATACCTTTATTTGTATGATCAGTAGTAATTACTGCTGTTTTATTACTTTTATCATTA	23	0	0	0	0	0	0	0	0	0	0	0	0	0	0	0	1	0	0	0	0	0	0	0	0	0	0	0	0	0	0	0	0	0	0	0	0	0
OTU_684	Arthropoda	Insecta	Diptera	Chironomidae	Cricotopus	Cricotopus rufiventris	100	Private	TTTATCTTCAGGAATTGCACATGCTGGAGCTTCTGTTGACTTAGCTATTTTCTCTTTACATTTAGCAGGAATTTCCTCAATTTTAGGAGCAGTAAATTTTATCACAACAGTAATTAATATACGATCAGAAGGAATTACTCTAGACCGAATACCCTTATTTGTTTGATCCGTTGTAATCACTGCTATTCTTCTTTTATTATCTCTA	0	17	8	12	3	2	2	4	3	17	2	0	1	3	0	0	3	10	0	0	0	3	0	0	0	0	0	0	8	0	0	0	0	0	0	0	4	0
OTU_671	Arthropoda	Insecta	Diptera	Chironomidae	Cricotopus	Cricotopus suspiciosus	100	Published	TCTTTCTTCAGGAATTGCTCACGCTGGGGCTTCTGTTGATTTAGCTATTTTTTCACTTCATTTGGCTGGTATTTCTAGTATTTTAGGAGCAGTAAATTTTATTACTACTGTAATTAATATACGGTCAGAAGGAATTACTTTAGATCGGATACCTTTATTTGTTTGATCAGTAATTATTACTGCGATTCTATTGTTATTATCTTTA	160	0	0	0	0	0	0	0	0	0	0	0	0	0	0	0	0	0	0	44	0	0	0	0	0	0	0	0	0	0	0	0	0	0	0	0	0	0
OTU_1805	Arthropoda	Insecta	Diptera	Chironomidae	Cricotopus	Cricotopus trifascia	100	Published	TCTTTCTGCCGGAATTGCTCATGCTGGGGCATCAGTTGATTTAGCAATTTTCTCTTTACACTTAGCTGGGATTTCTTCTATCTTAGGAGCTGTAAATTTTATTACAACAGTAATTAATATACGATCAGAAGGAATTACTTTAGATCGAATACCTTTATTTGTTTGATCAGTAGTAATTACTGCAATCTTACTCCTTTTATCATTA	0	0	0	0	0	0	0	0	0	0	0	0	0	0	0	0	0	0	0	17	0	0	0	0	0	0	0	0	0	0	0	0	0	0	0	0	0	0
OTU_3091	Arthropoda	Insecta	Diptera	Chironomidae	Cricotopus	Cricotopus vierriensis	100	Private	TCTTTCTTCTGGTATTGCTCACGCTGGGGCATCAGTTGATTTAGCAATTTTTTCTTTACATTTAGCAGGAATCTCTTCAATTTTAGGAGCAGTAAATTTTATTACTACTGTAATTAATATACGATCAGAAGGTATTACTTTAGATCGAATGCCTTTATTTGTCTGATCTGTAGTAATTACTGCTGTACTACTTTTATTATCTTTA	0	3	4	4	0	0	0	0	0	0	2	3	0	1	0	0	3	0	0	0	0	0	0	0	0	0	0	0	0	0	0	0	0	0	0	0	0	0
OTU_830	Arthropoda	Insecta	Diptera	Chironomidae	Cryptochironomus	Cryptochironomus rostratus	100	Published	TTTATCTGCTGCTATTGCTCACAGAGGGGCATCAGTAGATTTAGCTATTTTCTCCCTTCATTTAGCGGGAGTATCTTCTATTTTAGGATCTGTAAATTTTATTACTACAGTAATTAATATACGAGCAAATGGAATTACTTTAGACCGAATACCTTTATTTGTTTGATCTGTTGTAATTACAACAGTTCTTCTTCTTCTGTCTCTC	41	21	23	12	3	1	5	0	1	4	1	2	4	3	3	0	2	0	3	0	1	7	1	4	0	0	0	0	0	0	0	0	0	0	0	0	0	0
OTU_2136	Arthropoda	Insecta	Diptera	Chironomidae	Dicrotendipes	Dicrotendipes nervosus	100	Private	CCTTTCTGCTGCTATTGCACATAGAGGGGCTTCAGTTGATTTAGCAATTTTTTCTTTACATCTAGCAGGTGTGTCATCAATCTTAGGTTCTGTAAATTTTATTACAACAGTAATTAATATACGAGCTAATGGAATTACTTTAGATCGAATACCTCTTTTTGTATGATCAGTTGTAATTACTACTATTTTATTACTTCTTTCTCTA	0	11	14	0	0	0	3	1	0	0	4	0	0	2	0	0	0	0	0	0	0	0	0	0	0	2	0	0	0	0	0	0	0	0	0	0	0	0
OTU_4177	Arthropoda	Insecta	Hemiptera	Cicadellidae	Eupteryx	Eupteryx calcarata	100	Private	ACTATCTAGTAGAATTTCTCACTCAGGTGTAAGAGTTGATTTAACTATTTTTTCATTACATTTAGCAGGTATTTCCTCTATTCTAGGGGCAGTAAATTTTATTTCGACAGTAATTAACATACGAACTAAAATAATAAAATGAGATATATTACCATTGTTTGTTTGATCAATTTTTATTACAGCAATTTTACTTTTAGTTTCACTA	0	0	0	0	0	1	0	0	0	0	0	0	0	0	0	0	0	0	0	0	0	0	0	0	0	0	0	0	0	0	0	0	0	0	0	0	0	0
OTU_3028	Arthropoda	Insecta	Diptera	Chironomidae	Harnischia	Harnischia fuscimana	100	Private	TCTTTCATCCGCAATTGCCCATAGAGGGGCATCTGTAGATTTAGCAATTTTTTCACTTCATTTAGCGGGAGTCTCTTCAATTTTAGGATCAGTAAATTTTATTACCACAGTAATTAATATACGAGCTAACGGAATTACCCTAGATCGAATGCCCTTATTTGTTTGATCTGTAGTAATTACTACAGTTCTTCTTCTTTTATCTTTA	0	0	3	0	0	0	0	0	0	0	0	0	0	0	0	0	0	0	0	0	0	0	0	0	0	0	0	0	0	0	0	0	0	0	0	0	0	0
OTU_1490	Arthropoda	Insecta	Coleoptera	Carabidae	Harpalus	Harpalus pumilus	100	Published	TTTATCATCTGGAATTGCTCATGGAGGAGCTTCAGTAGATTTAGCAATTTTTAGTTTACATTTAGCTGGAGTTTCTTCAATTTTAGGTGCAGTAAATTTTATTACTACAATTATTAATATACGATCAGTTGGAATAACATTTGATCGAATACCTTTATTTGTTTGATCAGTAGGAATTACAGCATTACTTTTACTTTTATCATTA	0	0	0	0	0	0	3	0	0	0	0	0	0	0	0	0	2	0	0	0	0	0	0	0	0	1	0	0	0	0	0	0	0	0	0	3	0	0
OTU_3106	Arthropoda	Insecta	Coleoptera	Heteroceridae	Heterocerus	Heterocerus fenestratus	100	Private	TTTATCAGCTAATATTGCCCACAGAGGATCTTCTGTAGATTTAGCTATTTTCAGATTACATTTAGCAGGAATTTCATCAATTCTGGGAGCCGTAAATTTCATTACAACTGTAATTAACATACGAGCTCCAGGTATAAGATTTGATCGAATACCTTTATTTGTTTGATCAGTAGTAATTACGGCAGTTTTACTTCTGCTTTCATTA	0	0	0	0	0	0	0	0	0	0	4	0	0	0	0	0	0	0	0	0	0	0	0	0	0	0	0	0	0	0	0	0	0	0	0	0	0	0
OTU_1740	Arthropoda	Insecta	Diptera	Limoniidae	Hoplolabis	Hoplolabis areolata	100	Published	TCTGTCAGCAGGTATCGCTCATGCTGGGGCATCAGTTGACTTAGCTATTTTTTCACTTCATTTAGCTGGAGTATCTTCTATTTTAGGAGCTGTAAATTTTATTACTACTGTAATTAATATACGATCTACAGGAATTACATTTGACCGAATACCTTTATTTGTATGAGCTGTAGTAATTACCGCTATTTTATTACTCTTATCTCTA	0	0	0	0	0	0	0	0	0	0	0	0	0	0	0	0	0	0	0	0	0	0	0	0	0	0	0	0	3	0	0	0	0	0	0	0	0	0
OTU_4011	Arthropoda	Insecta	Hemiptera	Aphididae	Hyalopterus	Hyalopterus pruni	100	Published	ATTATCTAATAATATTGCACATAATAATATTTCAGTTGATTTAACAATTTTTTCACTTCATTTAGCAGGAATCTCATCAATTTTAGGAGCAATTAATTTTATTTGCACAATTTTAAATATAATACCTAATAACATAAAATTAAATCAAATTCCTTTATTTCCATGATCAATTTTAATTACAGCTACCTTATTAATTTTATCACTC	0	0	0	0	0	0	0	0	0	0	0	0	0	0	0	0	0	0	0	0	0	0	0	0	2	0	0	0	0	0	0	0	0	0	0	0	0	0
OTU_1471	Arthropoda	Insecta	Hemiptera	Aphididae	Laingia	Laingia psammae	100	Published	TTTATCAAATAATATTGCTCATAATAATATTTCAGTTGACTTAACAATTTTTTCTCTTCACTTAGCAGGAATTTCTTCAATCTTAGGAGCAATTAATTTTATTTGTACAATCATAAATATAATACCTAACAATATAAAAATTAATCAAATTCCACTTTTTCCATGATCAATTTTAATTACAGCAATCTTATTAATTCTATCTTTA	0	0	0	0	0	0	0	0	0	0	0	0	0	0	0	0	0	0	0	13	0	0	0	0	0	0	0	0	0	0	0	0	0	0	0	0	0	0
OTU_4159	Arthropoda	Insecta	Coleoptera	Lampyridae	Lampyris	Lampyris noctiluca	100	Private	CCTATCAGCCAATATTGCTCATAGAGGGCCCTCAGTTGATTTAGCAATTTTTAGACTTCATTTAGCTGGTGTTTCTTCAATTCTTGGGGCAGTAAATTTTATTTCCACAATTATTAACATACGTCCTAATAGAATAATATTTGATCAAATACCCTTATTCGTATGAGCTGTCCTAATTACAGCTATTCTTCTACTCCTATCATTA	0	0	0	0	3	0	0	0	0	0	0	0	0	0	0	0	0	0	0	0	0	0	0	0	0	0	0	0	0	0	0	0	0	0	0	0	0	0
OTU_4652	Arthropoda	Insecta	Coleoptera	Carabidae	Lionychus	Lionychus quadrillum	100	Private	GCTATCTTCAGGAATTGCCCATGCTGGAGCTTCAGTTGATTTAGCTATTTTTAGATTACATTTAGCTGGAGTATCATCAATTTTAGGAGCTGTAAATTTTATTACAACAATTATCAATATACGTTCAGTTGGAATAACTTTTGATCGAATACCTTTATTTGTATGATCAGTAGGTATTACAGCTTTATTATTATTATTATCACTA	0	0	0	0	0	0	0	0	0	0	0	2	0	0	0	0	0	0	0	0	0	0	0	0	0	0	0	0	0	0	0	0	0	0	0	0	0	0
OTU_2298	Arthropoda	Insecta	Coleoptera	Chrysomelidae	Longitarsus	Longitarsus dorsalis	100	Published	TTAGCTTCTAATATTGCTCATAGAGGACCTTCTGTAGATTTAGCAATTTTCAGATTACATCTAGCTGGAATCTCATCAATTTTAGGAGCAATTAATTTTATTACAACAATTATTAATATACGGCCTTCAGGTATAAAACTAGATCAAATACCCCTTTTTGTTTGAGCTGTTATAATCACTGCAATTTTACTCCTTTTATCTTTA	0	0	0	2	0	0	0	0	0	4	0	0	0	0	0	0	0	0	0	0	0	0	0	0	0	0	0	0	0	0	0	0	0	0	0	0	0	0
OTU_2672	Arthropoda	Insecta	Coleoptera	Chrysomelidae	Longitarsus	Longitarsus reichei	99	Private	ATTATCCTCAAATATTACCCATGGTGGAACATCAGTTGATTTGGCAATTTTTAGACTTCACTTAGCGGGAATTTCTTCAATTTTAGGAGCTATTAATTTTATTACTACAGTAATTAATATACGCCCAATAGGAATAACATTAGATCGAATACCTCTATTTGTTTGAGCAGTTTTAATTACAGCTATTCTTTTACTTCTTTCCCTT	0	8	0	0	0	0	0	0	0	0	0	0	0	0	0	0	0	0	0	0	0	0	0	0	0	0	0	0	0	0	0	0	0	0	0	0	0	0
OTU_578	Arthropoda	Insecta	Diptera	Chironomidae	Macropelopia	Macropelopia nebulosa	98.53	Private	CTTAGCATCAGGAATTGCTCATGCTGGCGCTTCAGTTGACTTAGCTATTTTCTCTCTTCATCTAGCAGGAGTATCATCTATTTTAGGAGCAGTAAATTTTATTACAACTGTAATTAATATACGCTCTAATGGAATTACTTTAGACCGAATACCCTTATTCGTTTGATCTGTAGTAATTACTGCTGTCTTATTGTTACTATCTTTA	0	16	0	1	3	0	0	5	0	4	72	0	6	11	2	0	0	0	0	0	0	2	0	0	0	0	0	0	0	37	0	0	0	0	0	0	0	0
OTU_2551	Arthropoda	Insecta	Diptera	Syrphidae	Melanostoma	Melanostoma scalare	100	Published	TCTTTCTTCTAGAATTGCTCACGGTGGAGCTTCTGTTGATTTAGCTATTTTTTCTCTTCATTTAGCTGGTATATCTTCAATTCTAGGAGCAGTAAATTTTATTACTACAGTAATTAATATACGTTCTACAGGTATTTCTTATGATCGAATACCATTATTTGTTTGATCAGTTGTAATTACAGCTTTACTTCTTTTATTGTCATTA	0	0	0	0	0	0	0	0	0	0	0	0	0	0	0	0	0	0	0	0	0	0	8	0	0	0	0	0	0	0	0	0	0	0	0	0	0	0
OTU_250	Arthropoda	Insecta	Diptera	Chironomidae	Micropsectra	Micropsectra atrofasciata	99.51	Private	TCTATCTTCAAGAATTGCTCATAGTGGTGCATCAGTTGATTTAGCAATTTTTTCCCTACATTTAGCAGGAATTTCTTCTATTTTAGGTTCTGTAAATTTTATTACAACAGCAATTAATATACGATCAAATGGAATTACATTAGACCGAATACCTTTATTTGTCTGATCAGTTATTATTACCACTGTTGTACTCCTTCTATCATTA	0	0	112	0	0	0	0	0	0	0	14	0	0	0	0	0	0	0	0	0	0	0	0	0	0	0	0	0	0	0	0	0	0	0	0	0	0	0
OTU_4861	Arthropoda	Insecta	Diptera	Chironomidae	Microtendipes	Microtendipes pedellus	99.51	Private	TTTATCTTCTAATATTGCTCATAGCGGTGCATCTGTTGATTTAGCTATTTTTTCTCTTCATTTAGCAGGTGTATCTTCAATTTTAGGATCAGTAAATTTCATTACAACAGTAATTAATATGCGATCTAATGGAATTACTTTAGACCGAATACCTTTATTTGTCTGATCAATTGTAATTACTACAGTATTACTATTACTTTCATTA	0	2	0	0	0	0	0	0	0	0	0	0	0	0	0	0	0	0	0	0	0	0	0	0	0	0	0	0	0	0	0	0	0	0	0	0	0	0
OTU_1755	Arthropoda	Insecta	Coleoptera	Coccinellidae	Oenopia	Oenopia conglobata	100	Private	TTTATCTTCAAATTTAGCTCATAATGGTCCTTCAGTAGATTTAGTAATTTTTAGTTTACACTTAGCTGGAATTTCTTCAATTTTAGGAGCTGTAAATTTTATCTCTACTATTATAAATATGCGACCTTTTGGTATAAACCTTGATAAAACTCCTTTATTTGTATGATCAGTCTTAATTACTGCAATTTTACTATTGCTATCTTTA	0	0	13	4	0	0	0	0	0	0	0	0	0	0	0	0	0	0	0	5	0	2	0	0	0	0	0	0	0	0	0	1	0	0	0	0	0	0
OTU_2327	Arthropoda	Insecta	Diptera	Chironomidae	Paracladopelma	Paracladopelma laminatum	99.51	Published	TTTATCCTCTGCTATTGCCCACAGAGGGGCTTCTGTCGATTTAGCTATTTTTTCGTTACATTTAGCTGGTGTTTCTTCAATTCTAGGTTCAGTAAATTTTATTACTACTGTTATTAATATACGATCAAATGGAATTACATTAGACCGAATACCTTTATTTGTTTGATCTGTGGTAATTACTACAGTTCTTCTTCTTCTTTCATTA	0	0	0	0	0	0	0	0	0	0	0	0	0	0	0	0	0	0	0	0	0	7	0	0	0	0	0	0	0	0	0	0	0	0	0	0	0	0
OTU_2771	Arthropoda	Insecta	Diptera	Chironomidae	Paralauterborniella	Paralauterborniella nigrohalteralis	100	Published	TCTTTCCTCAAATATTGCTCATAGAGGAGCTTCAGTTGATTTAGCAATTTTTTCTTTACATTTAGCGGGGGTATCTTCTATTTTAGGGTCAGTAAATTTTATTACAACAGTTATTAATATACGAGCAAATGGAATCACTTTAGATCGAATACCTTTATTTGTTTGATCAATTGTTATTACTACTGTTCTTCTTCTTTTATCTCTA	0	6	0	0	0	0	0	0	0	0	0	0	0	0	0	0	0	0	0	0	0	0	0	0	0	0	0	0	0	0	0	0	0	0	0	0	0	0
OTU_205	Arthropoda	Insecta	Diptera	Chironomidae	Paratanytarsus	Paratanytarsus dissimilis	100	Private	ATTATCTTCAAGAATTGCTCATAGAGGGGCCTCAGTTGATTTAGCAATTTTCTCTCTTCACTTAGCAGGAATTTCTTCTATTTTAGGTTCAGTAAATTTTATTACAACAGCTATTAATATACGATCAAATGGAATTACTTTAGATCGGATACCTTTATTTGTTTGATCTGTAATTATTACTACTATTTTACTTCTTTTATCTCTT	195	287	56	49	15	3	4	4	1	14	44	5	9	13	1	0	3	3	0	63	289	23	38	10	4	1	1	1	2	46	0	0	0	0	0	1	3	0
OTU_922	Arthropoda	Insecta	Diptera	Chironomidae	Paratanytarsus	Paratanytarsus dissimilis	100	Private	ATTATCTTCAAGAATTGCTCATAGAGGAGCTTCGGTTGATTTAGCAATTTTTTCTCTTCATTTAGCAGGAATTTCATCTATTCTTGGATCAGTAAATTTTATCACAACTGCTATTAATATACGATCTAATGGTATTACTTTAGATCGAATACCTCTATTTGTTTGATCAGTTATTATTACTACTATTTTACTTCTTCTCTCTCTC	5	9	72	12	0	1	0	0	4	3	2	0	0	0	0	0	0	0	0	17	7	4	5	0	0	0	0	0	0	0	0	0	0	0	0	0	0	0
OTU_2743	Arthropoda	Insecta	Diptera	Muscidae	Phaonia	Phaonia tuguriorum	100	Private	ATTATCTTCCAACATTGCTCATAGAGGAGCTTCTGTTGATTTAACAATTTTTTCACTCCATTTAGCTGGAATTTCCTCTATTTTAGGAGCAGTAAATTTTATTACTACTGTAATTAATATACGATCAACAGGTATTTCATTTGATCGAATACCTTTATTTGTATGATCAGTAGTAATTACTGCATTATTATTACTTTTATCTTTA	0	0	0	0	0	0	0	0	0	0	0	0	0	0	0	0	0	0	0	9	0	0	0	0	0	0	0	0	0	0	0	0	0	0	0	0	0	0
OTU_2509	Arthropoda	Insecta	Coleoptera	Curculionidae	Polydrusus	Polydrusus impressifrons	100	Published	CCTCTCAGCAAATATCGCTCATGAAGGAGCCTCAGTAGATCTAGCAATTTTTAGATTACATATAGCAGGAGTTTCATCAATCCTAGGAGCAATTAATTTTATTTCTACTATTATTAATATACGACCCACAGGAATATCTCCTGATCAAATACCTTTATTTGTATGAGCAGTAAAAATTACAGCAATTTTACTTTTATTATCATTA	0	0	27	0	0	0	0	0	0	0	0	0	0	0	0	0	0	0	0	0	0	0	0	0	0	0	0	0	0	0	0	0	0	0	0	0	0	0
OTU_302	Arthropoda	Insecta	Diptera	Chironomidae	Polypedilum	Polypedilum nubeculosum	99.51	Private	TCTTTCAGCAAGTATCGCGCACAGAGGGGCTTCAGTAGATTTAGCCATTTTTTCTCTTCATTTAGCAGGGGTGTCCTCAATTTTAGGATCTGTAAATTTTATTACAACAGTTATTAATATGCGCTCTAGAGGTATTACTTTAGACCGAATACCTTTATTTGTCTGATCTATTGTTATTACAACAGTATTACTATTATTATCTTTA	28	4	25	14	5	0	1	1	4	313	0	1	0	6	1	4	2	0	0	21	0	13	0	0	0	3	0	1	114	0	0	0	0	0	1	0	2	0
OTU_1487	Arthropoda	Insecta	Diptera	Chironomidae	Polypedilum	Polypedilum scalaenum	100	Private	CCTATCAGCAAGAATTGCTCATAGTGGAGCTTCTGTTGATTTAGCTATTTTTTCATTACATTTAGCTGGAGTTTCTTCAATTTTAGGATCAGTAAATTTTATTACAACAGTAATCAATATGCGGGCTAAGGGTATTACTTTAGACCGAATACCTTTATTTGTTTGATCAATTGTAATTACAACTGTTCTCTTACTTTTATCTTTA	26	4	0	2	0	0	1	0	0	3	4	0	0	0	2	0	0	0	0	0	0	5	0	0	0	0	0	0	0	0	0	0	0	0	0	0	0	0
OTU_3758	Arthropoda	Insecta	Diptera	Chironomidae	Procladius	Procladius culiciformis	100	Published	TTTAGCATCTGGAATTGCACATGCTGGAGCTTCCGTTGATTTAGCAATTTTTTCTCTTCATTTAGCTGGGGTATCCTCTATTTTAGGTGCAGTAAATTTTATTACCACAGTTATTAATATACGGTCTAATGGAATTACCCTAGACCGAATACCATTATTCGTTTGATCAGTTGTAATTACAGCTGTTTTATTATTATTATCATTA	0	0	0	0	0	0	0	0	0	0	0	0	0	0	0	0	0	0	0	0	0	6	0	0	0	0	0	0	0	0	0	0	0	0	0	0	0	0
OTU_3391	Arthropoda	Insecta	Diptera	Chironomidae	Procladius	Procladius rufovittatus	100	Private	ATTAGCATCAGGTATTGCTCATGCTGGAGCATCAGTAGATTTGGCTATTTTTTCTTTACATTTAGCTGGAATTTCTTCAATTTTAGGAGCTGTAAATTTTATTACAACTGTAATTAATATACGATCAAATGGAATTACATTAGACCGAATACCTTTATTTGTATGATCTGTTGTTATTACTGCAGTTCTATTACTATTATCACTT	0	0	0	0	2	0	0	0	0	0	0	0	0	0	0	0	0	0	0	0	0	0	0	0	0	0	0	0	0	0	0	0	0	0	0	0	0	0
OTU_1839	Arthropoda	Insecta	Diptera	Chironomidae	Psectrocladius	Psectrocladius limbatellus	100	Private	TCTTTCTTCAGGAATTGCTCATGCAGGAGGATCTGTAGATTTAGCCATCTTCTCCCTACACCTTGCTGGAATTTCCTCTATTTTAGGAGCAGTAAACTTTATTACCACCGTAATCAATATGCGGTCTAATGGAATTACTTTAGATCGAATGCCATTATTCGTTTGATCAGTGGTTATTACTGCTGTCTTACTACTTCTATCACTT	0	0	0	0	0	2	0	0	0	0	0	0	0	0	0	0	0	0	0	0	0	0	0	0	0	0	0	0	0	0	0	0	0	0	0	0	0	0
OTU_3037	Arthropoda	Insecta	Coleoptera	Cantharidae	Rhagonycha	Rhagonycha fulva	100	Private	CCTTTCAGCTAATATTGCTCATAGAGGCCCTTCAGTTGATTTAGCTATTTTTAGACTTCATATAGCAGGGATCTCTTCAATTTTAGGAGCAGTAAACTTTATTTCAACTATTCTCAATATAAAGCCTCCCAGAATAAAGTTTGACCAAATACCTTTATTTGTTTGATCTGTAGGAATTACTGCATTACTATTACTTTTATCTTTA	0	0	0	9	0	0	0	0	0	0	0	0	0	0	0	0	0	0	0	0	0	0	0	0	0	0	0	0	0	0	0	0	0	0	0	0	0	0
OTU_83	Arthropoda	Insecta	Diptera	Chironomidae	Rheocricotopus	Rheocricotopus fuscipes	99.51	Private	TCTTTCATCAGGTATTGCTCATGCGGGGGGATCTGTGGATTTAGCAATTTTTTCCCTTCATTTAGCAGGAATTTCTTCTATTTTAGGGGCAGTAAATTTTATCACAACTGTAATTAATATACGATCTAACGGTATTACTCTAGATCGAATACCCCTATTCGTATGATCTGTAGTAATTACGGCAATTTTGCTTTTATTATCTTTA	6	0	0	0	0	0	0	0	0	0	0	0	0	0	0	0	0	0	0	0	0	0	0	0	0	0	0	0	0	0	0	0	0	0	0	0	0	0
OTU_2195	Arthropoda	Insecta	Hemiptera	Aphididae	Rhopalomyzus	Rhopalomyzus lonicerae	100	Published	ATTATCAAACAATATTGCCCATAATAATATTTCAGTTGATTTAACTATTTTTTCATTACATTTAGCAGGAATCTCATCAATTTTAGGAGCAATTAATTTTATCTGTACAATCTTAAATATAATACCAAATAACATAAAATTAAATCAAATTCCTTTATTTCCATGATCAATTTTAATTACAGCAATCTTATTAATTTTATCTTTA	0	0	0	0	0	0	0	0	0	9	0	0	0	0	0	0	0	0	0	0	0	0	0	0	0	0	0	0	2	0	0	0	0	0	0	0	0	0
OTU_3370	Arthropoda	Insecta	Hemiptera	Aphididae	Rhopalosiphum	Rhopalosiphum padi	100	Private	TTTATCTAATAATATTGCTCATAATAATATTTCAGTTGATTTAACAATTTTTTCTCTACATTTAGCAGGAATCTCATCAATTTTAGGGGCAATTAATTTTATTTGTACAATTTTAAATATAATACCTAATAATATAAAATTAAACCAAATTCCATTATTCCCTTGATCAATTTTAATTACAGCTATATTATTAATTTTATCTTTA	0	5	0	0	0	0	0	0	0	0	0	0	0	0	0	0	0	0	0	0	0	0	0	0	0	0	0	0	0	0	0	0	0	0	0	0	0	0
OTU_1865	Arthropoda	Insecta	Diptera	Sarcophagidae	Sarcophaga	Sarcophaga haemorrhoides	99.02	Private	ATTATCATCTAATATCGCGCATGGAGGGGCCTCTGTTGATTTAGCTATTTTTTCTTTACATTTAGCAGGAATTTCTTCAATTTTAGGAGCAGTAAATTTTATTACTACAGTAATTAATATGCGATCTACAGGTATTACTTTTGATCGAATACCTCTATTTGTATGATCAGTAGTAATCACTGCTTTACTATTATTACTCTCCTTA	0	0	0	0	0	0	0	0	0	0	0	0	0	0	0	2	4	1	0	0	0	0	0	0	0	0	0	0	0	0	0	0	0	0	0	0	0	1
OTU_4572	Arthropoda	Insecta	Diptera	Simuliidae	Simulium	Simulium lineatum	100	Private	ATTATCATCAGGAATTGCCCATGCAGGGGCATCAGTTGATTTAGCAATTTTTTCCTTACATTTAGCCGGAATTTCATCAATTTTAGGAGCTGTAAATTTTATTACAACAATTATTAATATACGATCAAATGGAATTACTTTTGATCGAATACCATTATTTGTTTGATCTGTAGTAATTACAGCTATTTTATTATTATTGTCCCTA	0	0	0	0	0	0	0	0	0	0	0	0	0	0	0	0	0	0	0	1	0	0	0	0	0	0	0	0	0	0	0	0	0	0	0	0	0	0
OTU_3209	Arthropoda	Insecta	Diptera	Chironomidae	Tanypus	Tanypus punctipennis	99.51	Published	TTTATCATCAGGCATTGCCCATGCAGGAGCATCGGTAGATTTAGCAATCTTTTCTCTCCATCTTGCCGGAGTATCCTCTATTTTAGGGGCAGTAAATTTTATTACAACAGTAATTAATATACGATCTAACGGGATTACTTTAGATCGAATACCTTTATTTGTTTGATCGGTAGTTATTACCGCTGTCCTATTACTATTATCTCTA	0	0	0	0	3	0	0	0	0	0	0	0	0	0	0	0	0	0	0	0	0	0	0	0	0	0	0	0	0	0	0	0	0	0	0	0	0	0
OTU_1960	Arthropoda	Insecta	Diptera	Chironomidae	Tanytarsus	Tanytarsus bathophilus	100	Private	TCTTTCAGCTAGAATTGCTCATAGAGGTGCTTCTGTAGATTTAGCAATTTTTTCTCTTCATTTAGCTGGTATTTCTTCAATTTTAGGTTCTGTTAATTTTATTACTACAGCTATTAATATACGAGCAAATGGAATTACATTAGATCGAATACCTTTATTTGTGTGATCTGTTGTAATTACAACAATTTTATTATTATTATCATTA	0	0	18	0	0	1	0	0	1	0	1	0	0	0	0	0	0	0	0	0	1	0	0	0	0	0	0	0	0	0	0	0	0	0	0	0	0	0
OTU_525	Arthropoda	Insecta	Diptera	Chironomidae	Tanytarsus	Tanytarsus brundini	98.53	Early-Release	TTATCTTCAAGAATTGCCCACAGAGGTGCTTCTGTAGATTTAGCTATTTTTTCTCTTCATTTAGCAGGGATTTCTTCTATTTTAGGATCAGTAAATTTTATTACAACTGCTATTAATATGCGGGCTAATGGAATTACATTAGATCGAATACCCCTGTTTGTCTGATCAGTAGTAATTACAACTGTGTTACTACTTTTATCACTG	183	15	0	0	4	0	3	0	8	0	0	0	0	0	0	0	1	0	0	0	0	0	0	0	0	0	0	0	0	0	0	0	0	0	0	0	0	0
OTU_718	Arthropoda	Insecta	Diptera	Chironomidae	Tanytarsus	Tanytarsus brundini	99.51	Private	CTTATCTTCCAGAATTGCCCACAGAGGGGCTTCTGTAGATTTAGCTATTTTTTCTCTTCATTTAGCAGGTATTTCTTCTATTTTAGGATCAGTAAATTTTATTACAACTGCCATTAATATGCGGGCTAATGGAATTACATTAGATCGAATACCTCTGTTTGTCTGATCAGTAGTAATTACAACTGTGTTATTACTTTTATCACTA	47	26	54	12	4	1	14	15	5	84	2	8	4	5	4	0	1	0	0	0	0	0	0	0	1	0	7	1	9	0	0	0	0	0	0	0	0	0
OTU_881	Arthropoda	Insecta	Diptera	Chironomidae	Tanytarsus	Tanytarsus brundini	98.01	Private	TTTATCTTCAAGAATTGCCCACAGAGGTGCTTCTGTAGATTTAGCTATTTTTTCTCTTCATTTAGCTGGTATTTCTTCTATTTTAGGATCAGTAAATTTTATTACAACTGCCATTAATATGCGAGCTAATGGAATTACATTAGATCGAATACCTCTATTTGTATGATCAGTAGTAATTACAACCGTGTTATTACTTTTATCACTG	0	0	0	0	0	0	0	0	0	0	0	0	3	1	0	0	0	22	0	0	0	0	0	0	0	0	0	0	0	0	0	0	0	0	0	0	3	0
OTU_3474	Arthropoda	Insecta	Diptera	Chironomidae	Tanytarsus	Tanytarsus brundini	98.04	Private	TTATCTTCAAGAATTGCCCACAGAGGTGCTTCTGTAGATTTAGCTATTTTTTCTCTTCATTTAGCAGGTATTTCTTCTATTTTAGGGTCAGTAAATTTTATTACAACTGCTATTAATATGCGAGCTGATGGAATTACATTAGATCGAATACCTCTATTTGTCTGATCAGTAGTAATTACAACTGTATTATTACTTTTATCACTA	0	0	0	3	0	0	0	1	5	0	0	1	0	0	0	0	0	0	0	4	0	0	0	0	0	0	4	0	0	0	0	0	0	0	0	0	0	0
OTU_2309	Arthropoda	Insecta	Diptera	Chironomidae	Tanytarsus	Tanytarsus ejuncidus	100	Private	TCTTTCTGCAAGTATTGCCCATAGAGGAGCTTCTGTTGATTTAGCTATCTTTTCTCTTCATTTAGCAGGAATCTCTTCTATCTTAGGATCAGTAAATTTTATTACTACAGCAATTAATATGCGAGCTAATGGAATTACTTTAGATCGTATACCCCTCTTTGTGTGATCTGTTGTTATTACAACAATTCTTCTTCTTTTATCATTA	0	0	0	2	0	0	0	5	0	1	0	0	0	0	0	0	0	0	0	0	0	0	0	0	0	0	1	0	0	0	0	0	0	0	0	0	0	0
OTU_651	Arthropoda	Insecta	Diptera	Chironomidae	Tanytarsus	Tanytarsus eminulus	100	Published	CCTCTCTTCTAGAATTGCCCATAGAGGGGCTTCTGTAGATTTAGCTATTTTCTCTCTTCATTTAGCGGGAATTTCATCAATTTTAGGATCAGTAAATTTTATTACAACAGCAATTAATATACGAGCTAATGGAATTACGTTAGATCGAATACCTCTATTTGTTTGATCTGTAGTAATTACTACTATTCTTCTTTTACTCTCCCTT	241	17	11	6	0	0	1	0	0	0	2	1	1	0	0	0	0	0	0	9	0	0	0	0	0	0	0	0	0	0	0	0	0	0	0	0	0	0
OTU_234	Arthropoda	Insecta	Diptera	Chironomidae	Tanytarsus	Tanytarsus heusdensis	100	Private	TTTATCATCAAATATTGCTCATAGAGGAGCCTCAGTAGATTTAGCTATTTTTTCTCTTCATTTAGCAGGAATTTCATCAATTTTAGGCTCTGTAAATTTTATTACTACTGCTATTAATATACGATCAAATGGTATCACTTTAGACCGAATACCTTTATTCGTATGATCTGTTGTTATTACTACAATTTTATTACTTTTATCATTA	104	25	53	15	15	2	5	3	107	10	7	4	1	3	4	0	1	0	0	56	0	27	0	11	0	1	1	104	0	1	0	0	0	0	1	0	0	0
OTU_1208	Arthropoda	Insecta	Diptera	Chironomidae	Tanytarsus	Tanytarsus lestagei	100	Published	TTTATCAGCTAGTATTGCCCATAGAGGAGCATCTGTTGATTTAGCTATTTTTTCCCTCCATTTAGCAGGAATCTCATCAATTTTAGGATCAGTAAATTTTATTACTACAGCTATTAATATACGGGCTAATGGAATCACTTTAGATCGTATACCTTTATTTGTTTGATCTGTTGTTATTACTACAATTCTTCTTCTTTTATCTTTA	0	15	0	3	0	0	7	1	0	0	0	1	0	1	0	0	0	0	0	0	0	0	0	0	0	0	0	0	0	0	0	0	0	0	0	0	0	0
OTU_1833	Arthropoda	Insecta	Diptera	Chironomidae	Tanytarsus	Tanytarsus medius	100	Private	TTTATCTGCAAGAATTGCACATAGAGGAGCTTCTGTAGATTTAGCTATTTTTTCTCTTCACTTAGCTGGAATTTCTTCAATCTTAGGGTCAGTAAATTTTATTACTACTGCTATTAATATACGAGCTAACGGAATTACATTAGATCGAATACCTCTTTTTGTTTGATCTGTTGTAATTACCACAGTTCTTCTTCTTCTTTCTTTA	0	3	0	4	4	3	0	0	4	0	0	0	0	0	0	0	0	0	0	0	0	0	0	0	0	0	0	0	0	0	0	0	0	0	0	0	0	0
OTU_1734	Arthropoda	Insecta	Diptera	Chironomidae	Tanytarsus	Tanytarsus pallidicornis	100	Private	TTTATCTTCAAGAATTGCTCATAGAGGCGCTTCTGTAGATTTAGCTATTTTTTCTCTCCATTTAGCAGGTATCTCTTCAATCTTAGGATCCGTTAATTTTATTACAACAGCTATTAATATACGATCAAATGGAATTACTTTAGATCGAATACCTTTATTTGTTTGATCTGTCGTTATTACTACAATCTTATTACTTTTATCATTA	8	0	0	0	3	0	0	0	0	0	0	0	0	0	0	0	0	0	0	0	0	0	0	0	0	0	0	0	0	0	0	0	0	0	0	0	0	0
OTU_1652	Arthropoda	Insecta	Diptera	Chironomidae	Tanytarsus	Tanytarsus usmaensis	100	Early-Release	TTTATCATCAAGAATCGCCCATAGTGGGGCTTCTGTTGATTTAGCAATTTTTTCTCTACATTTAGCAGGAATCTCATCAATTTTAGGATCAGTAAATTTTATTACAACTGCTATTAATATACGATCTAATGGTATTACTTTAGATCGGATACCTTTATTTGTGTGATCTGTTGTAATTACAACTATTCTTTTACTTCTTTCATTA	0	4	8	7	0	0	1	2	0	0	0	0	0	0	0	0	0	0	0	0	0	0	0	0	0	0	0	0	0	0	0	0	0	0	0	0	0	0
OTU_2070	Arthropoda	Insecta	Diptera	Chironomidae	Tanytarsus	Tanytarsus usmaensis	100	Private	CTTATCTTCAAGAATCGCTCATAGTGGCGCTTCTGTTGATTTAGCAATTTTTTCTCTACATTTAGCAGGAATCTCATCAATTTTAGGATCAGTAAATTTTATTACAACTGCTATTAATATGCGGTCTAATGGTATTACTTTAGATCGAATACCTTTATTTGTATGATCTGTTGTAATTACAACTATTCTTTTACTTCTTTCATTA	0	10	0	0	1	0	0	1	0	0	0	5	0	0	0	0	0	0	0	0	0	0	0	0	0	0	0	0	0	0	0	0	0	0	0	0	0	0
OTU_3325	Arthropoda	Insecta	Diptera	Chironomidae	Thienemanniella	Thienemanniella vittata	98.52	Published	TTGTCAGCAAATATTGCTCACGCGGGAGCCTCTGTAGATTTAGCTATCTTTTCTCTTCATTTAGCCGGTATTTCATCAATTTTAGGGGCTGTAAATTTTATTACTACAGTAATTAATATGCGATCTGAAGGTATTTCATTACACCGAATACCTTTATTTTTTGATCAGTAATTATTACAGCTATTTTACTACTGCTGTCTCTA	0	0	0	0	0	0	0	0	0	0	0	0	0	0	0	0	0	0	0	1	0	0	0	0	0	0	0	0	0	0	0	0	0	0	0	0	0	0
OTU_2039	Arthropoda	Insecta	Thysanoptera	Thripidae	Thrips	Thrips tabaci	100	Private	TTTATCAACGTTTTATCATTCAGGACCTTCAGTAGACTTAACAATTTTTTCTTTACACCTTGCAGGGATTTCTTCAATTTTAGGTGCCTTAAATTTTATTACTACAATTATTAATCTTAAAGCAAAAAACCTTTCAGCGGAAAAAATTAGACTATTTGTCTGATCAGTTATTTTAACAGCCATTCTTCTTCTTTTATCTTTG	0	0	0	0	0	0	0	2	0	0	0	0	0	0	0	0	0	0	0	0	0	0	0	0	0	0	0	0	0	0	0	0	0	0	0	0	0	0
OTU_592	Arthropoda	Insecta	Diptera	Tipulidae	Tipula	Tipula couckei	100	Private	CCTTTCTGCTGGTATTGCCCATACTGGAGCATCAGTAGATTTAGCAATTTTTTCATTACACTTAGCTGGAATTTCTTCTATCCTAGGAGCAGTAAATTTTATTACAACAGTAATTAATATACGATCTAGAGGAATTACACTAGATCGAATACCATTATTTGTTTGATCAGTAGTAATTACTGCTGTACTTTTACTTTTATCTCTA	212	32	54	7	1	1	0	6	3	17	5	4	11	5	9	2	0	0	0	12	0	2	0	0	0	0	2	0	10	0	0	0	0	0	0	0	0	0
OTU_2649	Arthropoda	Insecta	Diptera	Tipulidae	Tipula	Tipula oleracea	100	Private	ACTTTCTGCTGGAATTGCTCATACAGGAGCATCAGTAGATCTAGCTATTTTTTCTCTTCATTTAGCAGGAATTTCCTCTATTTTAGGAGCTGTAAATTTTATTACTACAGTTATTAATATACGATCAAGAGGAATTACATTAGATCGAATACCATTATTTGTTTGATCAGTAGTGATTACTGCTGTTTTATTACTTCTTTCTTTA	0	0	0	2	0	0	0	0	0	0	0	0	0	0	0	0	0	0	0	0	0	0	0	0	0	0	0	0	0	0	0	0	0	0	0	0	0	0
OTU_594	Arthropoda	Insecta	Diptera	Tipulidae	Tipula	Tipula paludosa	100	Private	ACTTTCTGCCGGAATTGCCCATACAGGAGCATCAGTAGATCTGGCTATTTTTTCTCTCCACTTAGCGGGAATTTCTTCTATTCTAGGAGCTGTAAATTTTATTACTACAGTTATTAATATACGATCAAGAGGAATTACATTAGACCGAATACCATTATTTGTCTGATCAGTAATAATTACTGCTGTTTTATTACTTCTTTCTTTA	0	19	18	11	1	3	2	2	1	0	5	2	2	4	4	2	0	6	2	71	0	0	0	0	0	0	0	0	0	0	0	6	0	0	0	0	0	0
OTU_974	Arthropoda	Insecta	Hemiptera	Cicadellidae	Tremulicerus	Tremulicerus fulgidus	99.51	Private	TCTTTCTTCTAATATTGCTCATTCAGGGCCTAGCGTTGATTTAGCTATTTTTTCTTTACACTTAGCCGGTATCTCTTCAATCTTAGGTGCTGTGAATTTTATTACTACTGTAATTAATATACGCTCTTCAGGTATAACTTTTGATCAAACTCCTTTATTTGTGTGGTCAGTATTAATTACAGCTGTACTACTATTACTTTCACTA	0	3	0	11	12	4	5	0	0	0	0	0	0	0	4	0	0	0	0	0	0	0	2	0	0	2	0	0	0	0	0	0	0	0	0	0	0	0
OTU_1108	Arthropoda	Insecta	Diptera	Chironomidae	Corynoneura		98.04	Published	CCTATCTTCAAATATTGCTCATGCAGGAGCTTCTGTAGATTTAGCCATTTTTTCTCTACATTTAGCAGGGATCTCATCAATTTTAGGAGCTGTAAATTTTATTACTACTGTAATTAATATACGATCTGAAGGAATTTCATTAGACCGAATACCTTTATTTGTATGATCTGTTGTTATTACTGCAGTACTTTTACTACTTTCTTTA	0	0	0	0	0	0	0	0	0	0	0	0	0	0	0	0	0	0	0	0	0	0	0	0	0	0	0	0	0	0	13	0	0	0	0	0	0	0
OTU_1467	Arthropoda	Insecta	Diptera	Chironomidae	Nanocladius		100	Early-Release	TCTTTCATCAAGAATTGCCCACGCTGGGGGATCTGTAGATCTAGCTATTTTTTCTCTTCACCTGGCAGGAATTTCATCTATCCTAGGAGCTGTAAACTTTATTACAACTGTAATTAATATACGCTCCTCAGGAATTACTTTAGACCGGATACCTCTATTTGTTTGATCTGTAGTAATTACAGCAATTTTATTACTCCTTTCATTG	0	0	0	0	0	8	0	0	0	0	0	0	0	1	0	0	0	0	0	0	0	0	0	0	11	0	0	0	0	0	0	0	0	0	0	0	0	0
OTU_1480	Arthropoda	Insecta	Diptera	Chironomidae	Psectrocladius		99.51	Published	CCTTTCTTCAGGGATTGCCCACGCTGGGGGGTCTGTAGATCTTGCAATTTTTTCATTACATTTAGCAGGTATTTCCTCAATTCTTGGGGCAGTTAATTTTATTACAACAGTAATTAATATACGATCAAATGGTATTACTTTAGATCGAATACCATTATTTGTCTGATCAGTAGTTATTACTGCTATTTTACTATTACTTTCTTTA	0	0	8	5	0	0	0	0	0	0	0	0	0	0	0	0	0	0	0	0	0	0	0	0	0	0	0	0	0	0	0	0	0	0	0	0	0	0
OTU_75	Arthropoda	Insecta	Coleoptera				85.78	Private	ATTATCTGGTATTACAGCACACTCTGGTGGTTCTGTTGATTTAGCAATTTTTAGTTTACATTTATCTGGTGTTTCTTCTATTGCTGGTTCTATCAATTTTATGACAACAATAATTAATATGCGTGTTAAaggtttaactttatatcgtttacctttatttatttgagcagtttttttaacagcatttttattAGTTTTAACTTTA	2344	1140	1519	305	127	84	96	128	105	242	86	90	144	174	164	57	83	96	90	209	127	164	19	10	5	4	14	11	30	4	0	22	21	15	10	11	6	14
OTU_92	Arthropoda	Insecta	Odonata				88.24	Private	TCTTTCAGGAAATATTGCACATTCTGGGCCTGCTGTAGATTTAGCAATTTTTAGTTTACATATTTCTGGTGCTTCTTCTATTTTGGGATCAATTAATTTTATTATTACAATTACTAATATGCGTGCACGTGGTATGACAATGTATATGTTACCTTTATTTGCTTGATCTGTTTTAATTACTGCGTTTTTACTTGTTTTATCATTA	1589	242	295	671	116	70	95	90	37	116	75	35	76	55	44	22	25	33	16	406	44	42	64	23	7	9	17	5	23	10	17	15	3	6	3	6	4	4
OTU_174	Arthropoda	Insecta	Diptera	Chironomidae	Cladotanytarsus		99.51	Private	TTTATCTTCTAATATTGCTCATAGAGGGGCTTCTGTTGATTTAGCTATTTTTTCTCTACATTTAGCAGGAATTTCTTCAATTTTAGGATCAGTAAATTTTATTACTACTGCTATTAATATGCGAAGAAATGGAATTACTTTAGATCGAATACCTTTATTTGTTTGATCTGTTATTATTACTACTATTCTTTTACTTTTATCCCTC	13	0	14	5	0	0	0	2	6	1	0	0	0	1	2	0	0	350	0	0	0	0	0	0	0	0	0	0	0	0	0	0	0	0	0	0	262	0
OTU_231	Arthropoda	Insecta	Lepidoptera				86.05	Private	ACTTTCAAGTATAGAATATCATTCAGGAGGATCTGTAGATTTAGCAATTTTTAGTTTACATTTAGCTGGAATTTCCTCAATTTTAGGAGCTACTAATTTTATTACTACAATTTTAAATATGAGAGCCCCAGGAATGACTATGCATAAATTACCTTTATTCGTTTGAGCTGTATTTATTACTGCTTGATTATTATTATTATCATTG	54	75	81	30	8	3	12	9	8	16	11	2	8	13	3	7	3	7	4	223	86	53	34	9	8	6	6	8	13	7	0	22	9	11	6	10	5	4
OTU_256	Arthropoda	Insecta	Coleoptera				87.1	Private	TTTGTCTAGTATTGGTTCTCATTCTGGTGGTTCAGTTGATTTAGCAATTTTTAGTTTACATTTATCTGGTGTTTCTTCTATTGCTGGTTCAATTAATTTTATGACTACAATTATAAATATGCGTGTAAAAGGTTTAACTATGTATCGTATGCCTTTGTTTATTTGAGCTctttttttaacagcttttttattgattttaactttA	0	219	207	60	7	16	11	47	4	18	49	31	23	20	21	6	21	28	8	0	40	36	16	0	4	2	12	2	0	6	0	0	11	1	3	2	5	2
OTU_268	Arthropoda	Insecta	Lepidoptera				85.39	Published	GTTAAGTAGTGCGCAAGCTCATTCAGGTCCTTCTGTTGACTTAGCAATTTTTAGTCTTCATTTATCAGGTGCATCATCTATTTTAGGAGCAATTAACTTTATTACTACTATTTTCAATATGAGAGTTCCTGGAATGTATTTTTACCGTATGCCATTATTTGTTTGGTCTGTATTAGTTACTGCATTTTTATTATTATTATCTTTA	67	109	145	59	38	16	17	24	19	48	24	15	46	30	32	16	28	27	33	2	1	7	0	14	0	0	0	0	1	0	0	1	0	0	0	0	0	0
OTU_287	Arthropoda	Insecta	Lepidoptera				85.39	Published	ATTATCAAGTACATTAGGTCATCCTGGTAGCTCTGTTGATTTTGCAATATTTAGTTTACATATCGCAGGTATATCTTCTATTTTAGGTGCAATTAATTTTATTACTACTATACAAAATATGAGATTAAGAGGATTAAATTTTTTTAAAGTTCCATTATTTGTATGATCAGTATTGATAACAGCAGTTTTATTATTATTATCTTTA	123	42	137	39	14	7	11	7	5	16	15	9	20	17	12	5	9	13	7	47	14	22	12	2	4	5	3	5	9	6	9	6	5	4	0	3	9	1
OTU_293	Arthropoda	Insecta	Lepidoptera				87.64	Published	ATTAGCAGGTATAGAAAGCCATTCAGGAGGTTCAGTAGATTTAGCAATTTTTAGTTTACATTTAGCAGGTGCTTCATCTATTTTAGGAGCTATTAATTTTATAACAACTATTATAAATATGCGTGCTCCTAGCTTAAAAATGCATTGAATACCTTTATTTGTTTGAGCAATTTTTATTACAGCATTTTTATTACTATTATCATTA	298	79	124	40	10	9	20	29	12	41	37	8	15	24	34	7	9	16	12	35	0	0	3	0	0	0	2	2	4	2	9	1	0	0	2	0	0	1
OTU_296	Arthropoda	Insecta	Lepidoptera				85.39	Published	TTTAAGTTCTGTTCAAGCTCACTCAGGGCCTTCTGTTGATCTTGCCATTTTTAGTCTTCACTTAGCTGGGGCATCTTCTATTTTAGGTGCAATTAATTTTATTACAACTATTTTTAATATGCGTGCGCCTGGGATGTCGATGCATAGATTGCCACTATTAGTATGGGCTGTTTTAATTACAGCCTTTTTACTATTATTATCATTA	190	69	94	29	10	2	10	11	5	19	9	3	24	12	14	2	5	6	1	78	15	26	2	1	1	0	0	1	5	1	2	3	4	4	2	1	1	2
OTU_305	Arthropoda	Insecta	Lepidoptera				85	Published	ATTATCAAGTGTACAAGCACATTCTGGACCTTCTGTAGATTTAGCAATTTTTAGTTTACATTTAGCAGGAGCTTCTTCTATTTTAGGTGCAATTAATTTTATTGTTACTATTGTAAATATGAGATGTCCAGGGATGTTTATGCATAAAATTCCATTGTATGTTTGAGCTGTATTTATAACAGCATTCTTATTATTATTTTCTATG	193	39	73	15	5	3	4	2	2	15	4	5	5	2	2	3	4	5	1	103	23	73	18	0	2	4	5	4	7	5	0	8	1	2	3	0	4	1
OTU_308	Arthropoda	Insecta	Hemiptera				86.07	Published	ATTATCTAGAATAAATTTTCATTCTGGTTTTTCTGTAGATTTAGCTATTTTTTCTTTACATATAGCTGGAATTTCTTCTATTTTGGGGGCCATTAATTTTATTACAACAATTATTAATATACGTTCTGTTTTTATAAAATTTGAATTAATTCCTTTATTTGTTTGATCTGTATTTATTACAGCTATTTTATTATTATTATCATTG	0	0	37	0	0	0	0	0	264	0	0	0	0	0	0	0	0	0	0	0	0	11	0	0	0	0	0	18	0	0	0	0	0	0	0	0	0	0
OTU_314	Arthropoda	Insecta	Hymenoptera				85.53	Published	TTTATCTAGTATTTTATATCATTCTTCTATTTCTGTAGATTTAGGTATATTTTCTTTACATTTAGCCGGTTTATCTTCAATGTTAGGTTCTATAAATTTTATGGTAACTGTAATGAATTTAAGAGCTCCAGGTATAAAATATACAGGATTAAATTTATATGTTTGAAGTATAATAATAACTTCTGTATTATTAATATTAGCTTTA	350	72	159	37	5	1	12	11	9	31	14	7	20	20	13	8	9	9	15	4	0	0	0	7	0	1	0	0	0	0	0	0	0	0	0	0	0	0
OTU_335	Arthropoda	Insecta	Lepidoptera				85.39	Private	ATTAGCAAACAGTATATTTCATAGAGGGGTATCTGTAGATTTAGCAATTTTCAGACTTCATTTAGCAGGAATCTCATCAATTTTAGGAGCAATTAATTTTATTACCACAATTATCAATATAAACACTACCCAGTCATCTGAACAAACCCCACTGCTAGTTTGATCAGTAATAGTAACTGCAATTTTATTGTTACTATCGTTA	0	0	0	0	0	0	0	216	2	0	0	0	0	0	0	0	0	0	0	12	0	0	0	0	0	0	18	0	0	0	0	0	0	0	0	0	0	0
OTU_341	Arthropoda	Insecta	Odonata	Calopterygidae			93.14	Private	TTTATCAGGAAATATTGCTCATTCAGGTCCATCTGTTGATTTAGCTATTTTTAGTTTACATATTGCAGGAGCATCATCACTTTTAGGATCAATAAATTTTATTGTTACTATTTTAAATATGCGTGCACGTGGTATGACTATGTATATGTTACCATTATTTGGTTGAGCTGTTTTAATTACAGCATTTTTATTAGTTTTATCATTA	209	69	101	24	6	4	17	11	4	9	10	5	12	12	3	6	8	4	8	26	11	11	13	4	3	0	0	3	2	3	5	0	0	0	2	3	3	0
OTU_354	Arthropoda	Insecta	Lepidoptera				86.52	Published	GCTATCTGGAAATGAAGCTCATTCTGGTGCCGCAGTCGACTTAGCTATTTTTAGTTTGCATTTGGCTGGTATTTCTTCAATTGCGGGAGCAATTAATTTTATTACAACTATTATTAATATGCAATTTCGCGGAGGTGCACTTTATCGAATGCCTTTATTTTGCTGAGCAGTTTTAATAACTGCAGTTTTGCTTTTACTTTCCTTA	291	44	48	19	3	8	12	10	8	18	8	6	21	18	8	4	4	8	10	20	2	6	1	0	0	0	1	0	0	0	0	0	0	0	0	0	0	2
OTU_371	Arthropoda	Insecta	Lepidoptera				85.39	Private	TTTAAGTAGTCTTGTAAGTCATTCTTCTGCAGCTGTAGATTTAGCCATTTTTAGTTTACACTTATCTGGTATTTCTTCAATTTTAGGTGCTATAAATTTTATAACAACTATTTTTAATATGAGAAGTCCTGGTTTATCAATGCATCATTTACCTTTATTCGTTTGATCAGTTTTAATCACTGCTTTTTTATTACTTTTATCTTTA	55	13	50	6	1	1	0	1	2	6	2	4	3	7	4	2	1	3	0	49	30	38	9	2	6	0	3	4	12	5	6	5	1	4	3	3	8	4
OTU_378	Arthropoda	Insecta	Lepidoptera				85.39	Private	GTTATCAAGTATTCAAGCACACTCAGGTGCTTCAGTTGATTTAGCAATTTTTAGTTTACATTTAGCAGGTATCTCATCTATACTTGGTGCTGTTAACTTTATTACAACAATTTTAAATATGAGACCTGAAAAAATGAGTATGCACTTATTACCATTATTCGTCTGGGCAGTTTTAATTACAGCAGTTTTATTATTATTATCTTTA	75	61	98	20	8	3	7	8	5	14	4	5	8	11	5	3	5	4	8	58	15	29	7	3	2	2	2	1	4	7	0	4	2	6	2	2	1	2
OTU_391	Arthropoda	Insecta	Lepidoptera				87.64	Published	TTTAAGTAGTATTTTAAGCCATTCTTCTGCTGCTGTTGATTTAGCTATTTTTAGTTTACATTTAGCTGGTATTTCTTCTATTCTTGGGGCTATTAATTTTATTACAACTATTTTTAATATGCGTAGCCCTGGTTTAGGTATGCATCAATTACCTCTTTTTGTTTGATCTGTTTTAATAACTGCTTTTTTATTAGTTTTATCCTTA	16	7	7	6	0	1	0	0	0	2	0	0	0	1	0	0	0	0	1	93	45	48	6	0	9	7	5	5	19	0	0	17	7	11	3	4	4	6
OTU_394	Arthropoda	Insecta	Lepidoptera				85.39	Private	TTTAAGTAGTACTTTATGTCATCCAGGTCCTTCAGTAGACTTAGCAATTTTTAGTTTACATTTATCTGGGGCTGCCTCGATTTTAGGTGCAATTAATTTTATTACAACTGTTATTAATATGCGATTACCTGGAATGACAATGTATCGTCTACCTTTATATGTTTGAGCCTCTTTTATTACTTCTTTTTTATTATTACTTTCGTTA	63	19	14	9	3	6	0	2	3	10	3	4	10	11	6	0	3	4	0	59	9	23	10	0	3	5	4	1	3	2	0	5	1	5	3	2	2	4
OTU_437	Arthropoda	Insecta	Lepidoptera				86.52	Private	ATTATCAGGTATTGAAAGTCATTCTGGAGGTTCTGTTGATTTAGCTATTTTTAGTTTACATTTAGCAGGTGCATCTTCAATTTTAGGAGCAATGAATTTTATTACTACTGTAATTAATATGAGAACTCCTGGTATGAAAATGCATAGAATTCCTTTATTTGTTTGAGCAGTTTTTATTACCGCATTTTTATTATTATTATCATTA	78	21	46	10	5	2	8	3	4	3	3	6	9	8	10	2	3	6	4	67	14	9	2	11	0	0	0	0	7	0	0	2	2	0	2	0	3	0
OTU_449	Arthropoda	Insecta	Lepidoptera				87.64	Published	ATTATCTGGTATTATAGCACATTCTGGAGGTTCTGTAGATCTAGCAATTTTTAGTTTACATTTAGCTGGAGTGTCTTCTTTATTAGGTGCTATTAATTTTATTACAACTATTTTTAATATGAGAGCTAGTAATTTAAGTTTATATCAATTACCTTTATTTTGTTGAGCAATTTTAATTACTGCATTTTTATTATTATTATCTTTA	106	21	55	31	4	2	4	9	5	15	7	3	16	7	6	1	4	2	2	44	17	11	5	0	4	0	0	0	2	2	0	2	2	1	0	0	3	0
OTU_471	Arthropoda	Insecta	Lepidoptera				88.76	Private	TTTAGCAAGTATAGAAAGTCATTCTGGTGGATCTGTAGATTTAGCGATTTTTAGTTTACATTTAGCAGGTGCTTCTTCAATTTTAGGAGCTATTAATTTTATTACTACAATAATAAATATGAGAGCTCCTAGTTTAAAAATGCATTGAATACCATTATTTGTTTGAGCTATATTTATTACAGCATTTTTATTATTATTATCTTTA	91	17	25	21	4	4	3	9	8	21	9	4	10	15	6	1	3	4	3	31	5	3	0	0	0	0	2	0	6	2	0	4	2	1	0	1	2	0
OTU_478	Arthropoda	Insecta	Odonata	Calopterygidae	Hetaerina		96.08	Private	TTTATCTGGAAATATTGCTCATTCTGGTCCATCTGTTGATTTAGCTATTTTTAGTTTACATATTGCAGGAGCTTCATCACTTTTAGGTTCAATTAATTTTATTGTTACTATTTTAAATATGCGTGCACGCGGTATGACAATGTATATGTTACCTTTATTTGTTTGAGCTGTTTTAATTACTGCATTTTTATTAGTTTTATCATTA	124	67	80	21	5	3	11	10	4	9	5	8	9	15	10	5	12	4	2	0	0	7	0	1	0	1	0	1	0	1	0	2	1	0	0	0	0	0
OTU_496	Arthropoda	Insecta	Coleoptera				86.17	Private	ATTATCTGGTATTGAAAGCCATTCAGGAGGTTCAGTAGATTTAGCTATTTTTAGTTTACATTTAGCAGGTGCTTCTTCAATTTTAGGAGCAATTAATTTTATTACTACTGTACTAAATATGAGAATACCTGGTTTAAAAATGCATAAAATTCCTTTATTTGTATGAGctatatttattacagctatattattattattatCTTTA	189	31	41	9	1	4	3	9	2	11	1	1	4	5	5	3	5	6	4	20	2	8	2	0	2	0	1	0	0	0	0	1	2	0	0	0	0	0
OTU_515	Arthropoda	Insecta	Lepidoptera				86.41	Published	TTTATCGATTTTAGAGGATAAGGGTGTAGATTTTGCTATTTTTAGTTTACATTTAGCCGGTATTTCTTCTTCATTAGGTGCTATTAATTTTATTACAACAATAATAAATATGCGTCATCCAGGATTACATTTACATATAACACCTTTATTTGCTTGAGCTGTTTTAGTAACAGCTTTTTTATTATTATTATCTTTA	173	0	12	6	3	0	12	15	6	26	12	7	3	5	6	4	4	2	2	0	0	0	0	0	0	0	3	1	0	2	0	0	1	0	0	1	0	0
OTU_524	Arthropoda	Insecta	Lepidoptera				87.64	Published	GTTAAGTAGTATACATAGTCATTCATCTGCTGCTGTGGATTTAGCAATCTTCAGTTTACATTTAGCTGGTATTTCTTCTATTTTAGGTGCTTTAAATTTTATTACAACTATTTTTAATATGCGTGCTCCTGGTTTAGGTATGCATCAATTACCTCTTTTTGTTTGAGCTGTATTAATCACAGCTTTTTTATTAATTTTATCTTTA	0	0	0	0	0	0	0	0	0	0	0	0	0	0	0	0	0	0	0	74	13	17	8	2	0	2	2	4	6	2	0	5	2	9	2	1	7	3
OTU_534	Arthropoda	Insecta	Odonata				88.73	Private	TTTATCAGGAAATATTGCACATTCAGGACCCGCGGTTGATTTAGCAATTTTTAGTTTACATATTTCAGGTGCATCGTCAATTTTGGGATCAATTAATTTTATTATTACAATTACAAATATGCGTGCACGTGGAATGACAATGTATATGTTACCTTTATTTGTATGATCTGTTTTAATTACTGCATTTTTACTTGTTTTATCATTA	50	18	41	8	4	5	4	1	3	9	4	3	5	5	5	4	3	3	5	10	4	14	3	3	2	0	1	0	4	2	8	5	1	3	3	1	1	2
OTU_542	Arthropoda	Insecta	Lepidoptera				87.5	Private	ATTAAGTGGATCATTAGCACATAGTGGTGCTTCTGTAGATTTAGCTATTGCTAGTTTACATTTAGCTGGTGTATCTTCAATATTAGGAGCAATTAATTTTATTACTACTATAATGAATATGAGAACAAGGGGTATGTATTTTGAAAGAACGCCTTTGTTTGTATGAACTGTTCTAGTAACAGCATTTTTATTAGTAACAACATTA	28	8	46	9	2	3	2	6	0	4	4	2	3	1	0	2	0	1	1	41	14	10	6	0	3	1	0	1	0	0	0	1	0	4	1	4	3	0
OTU_549	Arthropoda	Insecta	Lepidoptera				87.21	Published	ATTATCTGGTATTGAAAGTCATTCAGGAGGATCTGTAGATTTAGCAATATTTAGTTTACATTTAGCTGGAGCTTCTTCAATTTTAGGAGCTATTAATTTTATTACTACTGTTATAAATATGCGTTTACCTAATTTAAAAATGCATAAAATTCCTTTATTTGTTTGAGCAATATTTATTACTGCAATTTTATTATTATTATCATTG	57	17	24	8	4	7	6	4	4	6	4	4	4	7	8	3	7	11	2	6	2	0	0	3	0	2	3	0	5	1	0	1	1	0	0	1	0	0
OTU_550	Arthropoda	Insecta	Lepidoptera				87.64	Private	TTTAGCAAGTATTCAAGCACACTCTGGAGCTTCAGTAGATTTAGCTATTTTTAGTTTACATTTAGCAGGTATTTCATCTATTTTAGGTGCTGTTAACTTTATTACAACAATTTTAAATATGAGACCTGAAAAAATGAGTATGCATTTATTACCATTATTTGTTTGGGCAGTTTTAATTACAGCTGTTTTATTATTATTATCATTA	88	20	32	13	8	1	2	5	2	7	2	0	3	6	3	0	1	2	3	14	6	17	4	0	2	3	2	1	4	0	5	2	2	0	1	0	1	1
OTU_562	Arthropoda	Insecta	Lepidoptera				86.52	Published	TTTAAGTAGTTTTCAAAGTCACTCTTCTGCAGCTGTAGACTTAGCTATTTTTAGTTTACATTTAGCTGGTATATCTTCTATTTTAGGTGCTATTAATTTTATTACAACAATATTTAATATGAGAGCCCCTGGAATGAAAATGCACCAATTACCTTTATTCGTATGAGCAGTATTAATTACAGCTTTCCTTCTTTTATTATCATTA	19	22	25	0	1	0	5	0	5	5	3	2	5	3	0	1	2	1	0	18	26	16	5	1	1	2	0	1	7	4	0	5	1	1	6	3	2	0
OTU_580	Arthropoda	Insecta	Odonata				85.71	Private	ATTATCAGGAAATATTGCACATTCGGGTCCAGCTGTTGATTTAGCAATTTTTAGTTTACATATTTCCGGAGCATCTTCAATTTTAGGATCAATTAATTTTATTATTACTATTACAAATATGCGAGCACGGGGTATGACAATGTATATGCTACCTTTATTTGCATGATCAGTTTTAATTACGGCATTTTTACTTGTTTTATCATTA	152	11	12	3	9	0	2	3	5	2	3	2	4	10	3	2	6	3	2	5	5	2	4	0	0	0	0	0	0	1	0	0	0	1	2	3	0	2
OTU_602	Arthropoda	Insecta	Diptera				89.7	Private	CTTGTCTTCTGGAATTGCTCATGCTGGAGCATCAGTTGACTTAAGTATTTTTTCATTACATTTAGCAGGTATTTCTTCTATTTTAGGAGCTGTAAATTTTATTACTACAGTAATTAATATACGTTCTTATGGTATAACTTTAGATCGTATTCCTTTATTTGTTTGAGCTGTTGCAATTACAGCCCTTTTATTATTACTAAGTTTA	0	52	22	12	4	0	1	1	0	10	0	1	3	6	2	1	2	1	1	22	22	20	9	0	0	2	0	0	0	0	0	1	3	0	0	2	0	0
OTU_604	Arthropoda	Insecta	Coleoptera				85.29	Private	TTTATCTAGTATTACTGCTCATTCTGGTGGATCTGTTGATTTAGCTATTTTTAGTTTACATTTATCTGGTGTTTCTTCAATTGCTGGATCAATTAATTTTATGACAACAATAATTAATATGCGTGTAAAAGGTCTTACTTTATATCGTTTACCTTTGTTTATTTGAGCTATGTTTTTGACAGCATTTTTATTAGTTTTAACTTTA	78	31	77	20	4	1	3	7	2	15	3	2	0	0	6	1	2	1	1	6	8	8	4	0	0	0	0	1	5	1	0	0	0	0	0	1	0	0
OTU_624	Arthropoda	Insecta	Lepidoptera				85.39	Published	ATTATCTAGTATTCAAGCACATTCTGGAGCATCTGTCGATTTAGCTATTTTTAGTTTACACTTAGCAGGTATTTCATCTATTTTAGGAGCAGTTAATTTTATTACAACAATTTTAAATATGAGACCTGAAAAAATGAACATGCATTTATTACCTTTATTTGTATGGGCAGTTTTAATTACTGCAGTATTACTATTATTATCTTTA	71	30	38	14	2	6	1	1	1	6	2	1	13	9	2	0	1	3	1	12	4	6	2	1	1	1	1	0	7	0	1	2	1	1	0	1	1	0
OTU_652	Arthropoda	Insecta	Diptera	Chironomidae	Polypedilum		100	Private	TCTCTCTGCCAGTATTGCCCATAGTGGAGCTTCTGTAGATTTAGCAATTTTTTCTCTACACTTAGCGGGAGTTTCCTCAATTTTAGGATCTGTAAATTTTATCACAACGGTTATTAATATACGATCAAAAGGAATTACTTTAGACCGAATACCTTTATTTGTTTGATCAATTGTAATTACAACAGTTCTTTTACTTTTATCATTA	65	9	23	14	4	3	0	8	5	50	11	0	4	5	1	1	0	1	0	0	0	0	0	0	0	1	1	0	5	1	0	0	0	0	0	0	0	0
OTU_675	Arthropoda	Insecta	Lepidoptera				85.12	Private	TTTGTCTTCAGTTGAAGCACATAGTGGACCATCTGTTGATAGAGCTATTTTTTCACTTCATTTAGCTGGTGCATCATCTATTTTAGGTGCTATTAATTTTATTACTACTATTTTAAATATACGTGCTCCTGGTATAACTATACATCGTTTGCCATTGTTTGTTTGATCTGTAAGAATTACTGCTGTTTTGCTATTATTATCATTA	44	41	32	3	7	3	6	1	1	11	2	2	5	6	5	0	2	5	2	15	1	2	0	0	1	2	0	0	0	0	1	3	0	0	0	2	0	0
OTU_689	Arthropoda	Insecta	Lepidoptera				85.39	Published	GTTAAGTAGTATTCAAAGCCATTCTTCTGCTGCTGTAGATATAGCTATTTTTAGTTTACATTTAGCAGGTATTTCTTCTATTTTAGGAGCTATTAATTTTATTACAACAATTTTTAATATGCGTGCACCTGGTTTAGGAATGCATCAATTACCTCTATTTGTTTGATCTGTATTTATAACAGCTTTTCTTTTAGTTCTTTCATTA	0	0	0	0	0	0	0	0	0	0	0	0	0	0	0	0	0	0	0	15	20	23	9	2	0	3	0	2	7	2	6	4	1	3	2	4	1	1
OTU_694	Arthropoda	Insecta	Lepidoptera				87.5	Private	ATTAAGTGGATCATTGGCGCATAGTGGCGGTTCTGTTGATTTAGCTATTGCTAGTTTACATTTAGCTGGCGTATCTTCAATATTAGGAGCAATTAATTTTATTACTACAATTATGAATATGAGAACAAGGGGTATGTATTTTGAAAGGACGCCTTTGTTTGTATGAACTGTTCTAGTAACAGCATTTTTATTAGTAACAACATTA	0	2	24	7	0	0	3	3	3	2	0	2	6	2	1	0	0	3	1	10	6	6	0	0	0	0	0	0	3	1	0	4	2	0	0	0	3	1
OTU_696	Arthropoda	Insecta	Orthoptera	Acrididae	Chorthippus		97.95	Published	TCTCGCAGGAGCAATTGCACATGGAGGAGGATCAGTAGACCTAGCTATTTTTTCATTACATTTAGCGGGTGTTTCATCAATTTTAGGAGCAGTTAATTTCATTACAACCGCAATTAATATACGGTCGGAAAGAATAACACTAGATCAAACACCACTATTTGTTTGATCAGTAGCAATTACAGCACTCCTATTACTATTATCATTA	0	4	4	0	2	0	4	0	0	4	0	0	0	0	0	0	0	0	0	64	6	10	0	0	0	0	0	0	1	0	0	1	0	0	0	0	0	0
OTU_699	Arthropoda	Insecta	Odonata	Calopterygidae			93.14	Private	ATTATCTGGAAATATTGCACATTCTGGTCCATCGGTTGATTTAGCTATTTTTAGTTTACATATTGCAGGTGCGTCATCACTTTTAGGATCAATTAATTTTATTGTTACAATCTTAAACATGCGTGCGCGTGGTATGACAATGTATATGCTTCCTTTATTTGTTTGAGCTGTTTTAATTACTGCCTTTTTATTAGTTTTATCGTTA	60	17	53	24	2	5	5	6	2	12	5	5	5	12	7	1	6	2	2	0	0	5	0	0	0	0	0	0	0	0	0	2	0	0	0	0	1	0
OTU_712	Arthropoda	Insecta	Lepidoptera				85.39	Published	ATTAGCTGGTATTGAAAGTCACTCAGGAGGTTCTGTAGATTTAGCTATTTTTAGTTTACATCTAGCAGGTGCTTCTTCTATTTTAGGAGCAATCAATTTTATTACTACAGTAATTAATATGCGTGCTCCTGGTTTAAAAATGCATAGAATACCTTTATTTGTATGAGCAGTTTTTATTACTGCATTTTTATTATTATTATCATTA	50	9	28	10	3	1	2	3	0	7	4	1	13	5	2	2	2	2	3	30	2	0	0	0	0	0	0	0	2	0	0	0	0	0	0	1	0	0
OTU_719	Arthropoda	Insecta	Lepidoptera				85.39	Published	ATTATCTGGTATTATTGCACATTCAGGTGGTTCTGTTGATTTAGCTATCTTTAGTTTACATTTAGCAGGTATTTCTTCTTTATTAGGTGCTATTAATTTTATAACAACTGTATTTAATATGAGAGCGAGTGCTATGAGTATTTATGAAATACCTTTATTTTGTTGAGCTATTTTAATTACAGCTTTTTTATTATTATTATCATTA	31	19	20	2	0	1	3	1	3	4	4	0	8	2	1	1	1	3	1	9	0	12	0	0	2	0	0	0	0	0	0	1	1	0	0	0	1	0
OTU_746	Arthropoda	Insecta	Lepidoptera				87.64	Published	TTTATCAAGTATTCAAGCACACTCAGGCGCTTCTGTTGATTTAGCTATTTTTAGTTTACATTTAGCAGGTATTTCTTCAATTTTAGGTGCTGTTAACTTTATTACAACTATTTTAAACATGCGACCTGAAGGTATGAGCATGCATTTATTACCTTTATTTGTATGGGCTGTTTTAATTACTGCAGTTTTATTATTATTATCATTA	49	9	10	4	1	0	1	1	0	0	2	4	1	0	2	0	1	1	0	12	0	4	0	0	0	0	0	0	2	0	0	0	0	0	0	0	0	0
OTU_783	Arthropoda	Insecta	Coleoptera				85.78	Private	ATTATCAGGTATTACTGCACATTCTGGTGGTTCAGTAGATTTAGCAATTTTTAGTTTACATTTATCAGGAGTTTCATCAATTGCTGGTTCAATTAATTTTATGACAACAATAATTAATATGCGTGTTAAAGGTTTAACAATGTATCGTTTACCTTTATTTATTTGAGCTTTATTTTTAACTGCATTTTTATTAGTTTTAACTTTA	0	23	37	8	8	6	0	1	0	3	2	3	6	2	0	2	3	6	5	0	7	5	3	0	0	0	0	1	0	0	0	0	0	0	0	1	0	0
OTU_793	Arthropoda	Insecta	Lepidoptera				86.52	Published	ATTAAGTGGTGCAATTGCACATGCAGGACCTTCTGTCGATTTTGCTATTTTTAGTTTACATATTGCAGGAGCTTCTTCTATTATGGGTGCAATTAATTTTATTACAACTATTATTAATATGCGTCACCCTGGATGTAGTTTTCATAACATGAATTTATTCGTTTGGGCTGTATTTATTACAGCAATTTTATTATTATTATCTTTA	110	0	37	4	1	2	1	3	1	1	1	4	0	3	6	0	0	3	1	11	0	0	0	0	1	0	0	0	0	0	0	0	0	0	0	0	0	0
OTU_802	Arthropoda	Insecta	Lepidoptera				88.76	Published	GTTAAGTTCTGTACAAGCACACTCAGGTCCTTCTGTAGATTTAGCTATTTTTAGCTTACATTTAGCAGGTGCTTCGTCTATTTTAGGAGCAATCAATTTTATTACAACTATTCTTAATATGCGTGCTCCTGGTATGTCGATGCATCGCTTACCTTTATTTGTATGGGCTGTATTAATTACCGCATTTTTACTTCTACTATCTTTA	11	11	9	2	2	1	3	3	0	1	1	0	0	4	0	0	0	0	0	15	4	9	0	0	0	0	0	1	5	4	0	0	0	3	1	0	3	2
OTU_808	Arthropoda	Insecta	Coleoptera				91.79	Private	TTTATCTAGTATTGTTGCACATTCAGGTGGTTCAGTAGATTTAGCTATTTTTAGTTTACATTTAGCTGGTATTTCGTCAATAGCTGGTGCTATAAATTTTATGACAACAATTATAAATATGCGTGTAAAAGGTATGACTATGTATAGAATACCTTTATTTATTTGAGCTGTTTTTATTACAGCTTTTTTATTAGTTTTTACATTA	0	15	18	3	3	1	2	0	1	3	0	0	2	5	3	2	0	1	2	0	16	0	0	0	2	1	2	2	0	0	0	0	2	0	3	0	0	2
OTU_832	Arthropoda	Insecta	Diptera	Chironomidae	Cricotopus		100	Private	TCTTTCTTCAGGAATCGCGCATGCCGGAGCTTCTGTTGATTTAGCTATTTTTTCACTTCATTTAGCCGGTATTTCCAGTATTTTAGGGGCAGTAAATTTTATTACTACTGTAATTAATATACGATCAGAAGGGATTACTTTAGACCGAATACCTTTATTTGTTTGATCAGTAATTATTACCGCAATTCTATTGTTATTATCTTTA	11	18	11	6	3	4	7	0	0	8	0	1	7	2	1	1	0	0	2	4	3	13	0	0	0	2	0	0	2	0	0	0	0	0	0	0	0	0
OTU_837	Arthropoda	Insecta	Lepidoptera				87.64	Private	GTTATCTAGTATTCAAGCTCATTCAGGTGCGTCTGTTGATTTAGCTATTTTTAGTTTACACTTAGCTGGTATTTCATCCATTTTAGGTGCAGTTAATTTCATTACAACTATTTGTAATATGAGACCAGAAAAAATGAGTATGCATTTATTACCTTTATTTGTTTGGGCTGTTTTAATTACAGCAGTTTTATTATTATTATCTTTA	29	13	24	8	7	3	2	2	0	0	4	0	2	2	2	4	2	2	0	6	0	7	3	0	0	1	1	0	5	0	0	0	0	0	1	0	0	0
OTU_849	Arthropoda	Insecta	Odonata				86.76	Private	TTTAAGTAGTATTTTATCTCATTCTGGTCCTTCAGTTGATTTAGCTATTTTTAGTTTACATTTATCAGGAGCAGCCTCTATTTTAGGTTCTATTAATTTTATAACAACTGTTTTTAATATGCGTTCACCAGGATTAGCGATGCATAGAATACCTTTATTTGTTTGGGCTCTTTTAATTACTTCTTTTTTATTATTACTTTCTTTA	4	11	25	3	2	0	1	0	0	3	2	1	1	1	0	0	0	3	0	3	4	3	0	3	0	0	0	0	0	0	0	0	0	1	0	0	0	1
OTU_866	Arthropoda	Insecta	Hymenoptera				86.76	Published	ACTATCAAATCAAATATATCACGGAGGAAACTCAATTGATTTAGCTATTTTTTCGCTTCATCTAGCTGGAGCTTCTTCAATTCTAGGAGCCATTAATTTTATTACTACTATTATAAACATACGACCAATAGGTATATCTTTTGAACGTATCCCACTTTTTGTATGATCTGTTTTTATCACAGCAATTTTACTACTTCTATCCTTA	0	130	0	0	0	0	0	0	0	0	0	0	0	0	0	0	0	0	0	0	51	0	0	0	0	0	0	0	0	0	0	0	0	0	0	0	0	0
OTU_867	Arthropoda	Insecta	Lepidoptera				85.39	Private	ATTATCTGGAGTTATAGCACATTCAGGAGGGTCTGTTGATTTAGCAATTTTTAGTTTACATTTAGCAGGTGTTTCTTCATTATTAGGTGCTATTAATTTTATAACAACAGTATTTAATATGCGTGCTAGTAATATGAGTTTATATGAAATACCATTATTTGTTTGAGCTATTTTAATTACTGCCTTTTTATTATTATTATCATTA	29	13	11	9	2	0	3	3	3	5	2	4	0	3	4	1	0	0	0	8	4	0	1	0	0	0	2	0	1	0	0	0	0	1	0	0	0	0
OTU_882	Arthropoda	Insecta	Lepidoptera				85.39	Private	ATTATCAGGTATTGAAAGCCATTCAGGAGGATCAGTAGATCTTGCTATTTTTAGTTTACATTTAGCTGGTGCATCATCAATTTTAGGTGCTATCAATTTTATTACTACAGTAATAAATATGCGTGCGCCTGCAATGAAAATGCATAGAATTCCATTATTCGTTTGAGCTGTATTTATAACAGCGTTTTTATTATTATTATCTTTA	47	18	31	6	5	1	2	4	6	3	3	0	4	1	2	4	2	2	4	14	3	0	0	0	1	0	0	0	0	0	0	0	0	0	1	0	1	0
OTU_884	Arthropoda	Insecta	Coleoptera				88.24	Private	TTTATCTAGTATTACTGCGCATTCAGGTGGTTCTGTAGATTTAGCTATTTTTAGTTTACATTTATCAGGTGTTTCATCTATTGCTGGTGCAATTAATTTTATGACTACAATAATAAATATGCGTGTAAAAGGTATGACTTTGTACCGTTTACCTTTATTTATTTGAGCTTTATTTTTAACTGCATTTTTATTAGTTTTAACTTTA	0	17	22	3	6	1	6	3	4	10	0	0	5	5	1	0	2	8	4	0	2	0	0	0	0	0	0	0	0	0	0	0	0	0	0	0	3	1
OTU_899	Arthropoda	Insecta	Lepidoptera				86.36	Published	ATTAAGTAGTATAGTTGCTCATTCTGGCCCATCAGTAGATTTAGCAATTTTTAGTTTACATATTGCTGGAATATCATCTTTATTAGGTGCTATAAATTTTATTACAACTATATATAATATGAGAATAAATGGGTTAACCTTTCATAAATTACCTTTATTTGTTTGATCTGTTTTTATAACAGCATTTTTATTATTATTATCTTTA	32	8	13	6	2	0	0	1	1	1	1	0	2	6	0	0	4	1	0	14	1	5	1	4	0	2	0	0	1	0	0	0	0	0	0	0	1	0
OTU_920	Arthropoda	Insecta	Lepidoptera				86.52	Published	TTTATCGAGTATTGAAAGTCATTCTGGGGGTTCAGTTGATCTTGTTATTTTTAGTTTACATTTGGCAGGAGTTTCATCTTTATTAGGAGCCATTAATTTTATTACTACTATTTGTAATATGAGATTACCTAATATGACATGGAATCGTATTCCATTATTTGTTTGGGCTGTTTTTATTACAGCTATTTTGTTATTATTATCATTA	52	0	12	9	0	0	4	2	0	3	2	0	4	0	0	0	0	0	1	0	1	0	2	1	0	0	0	0	0	0	2	0	0	0	0	0	0	0
OTU_931	Arthropoda	Insecta	Lepidoptera				85.39	Private	ATTATCTGGCATTGAAGCACATTCTGGTGGTTCTGTAGATTTAGCTATTTTTAGTTTACACTTAGCAGGTGCATCTTCAATTTTAGGAGCAATGAATTTTATTACAACTGTAATTAACATGAGATCTCCAGCCCTAAAGATGCATAGAATTCCTTTATTTGTTTGAGCACTTTTTATAACTGCATTTTTATTATTATTATCATTA	42	12	33	9	0	1	2	1	5	8	4	0	0	2	3	0	2	1	0	0	0	5	0	0	3	0	0	0	0	0	0	1	0	0	0	0	0	0
OTU_986	Arthropoda	Insecta	Lepidoptera				87.64	Private	ATTATCTGGAATAATTGCGCATTCTGGAGGTTCTGTTGATTTAGCTATTTTTAGTTTACATTTAGCAGGTGTTTCTTCATTATTAGGAGCAATTAATTTTATTACAACTGTATTTAATATGAGAGCTAGTGAAATGAGTATTTATGAAATACCTTTATTTTGTTGAGCTATTTTAATTACAGCTTTTTTATTATTATTATCTTTA	23	13	6	7	1	0	2	2	0	6	0	2	0	8	0	1	0	4	1	9	0	1	0	0	0	0	0	0	0	0	0	0	0	0	0	0	1	0
OTU_1030	Arthropoda	Insecta	Coleoptera				86.76	Private	TTTATCTAGTATTACCTCACATTCTGGTGGCTCAGTAGATTTAGCAATTTTTAGTTTACATTTATCTGGTGTCTCTTCTATTGCTGGCGCAATTAATTTTATGACTACAATAATAAATATGCGTGTAAAAGGtatgactttatatcgtttacctttatttatttgatctttatttttaactgcatttttattGGTTTTGACTTTA	0	3	0	1	2	0	1	0	3	5	9	0	6	9	3	0	4	0	1	0	2	5	0	0	0	0	0	0	0	0	0	0	1	0	0	0	0	0
OTU_1033	Arthropoda	Insecta	Diptera	Chironomidae	Procladius		100	Private	TTTAGCCTCGGGTATTGCACATGCTGGAGCTTCAGTAGATTTAGCAATCTTTTCTCTTCACTTAGCTGGGGTTTCATCTATTTTAGGAGCTGTAAATTTTATTACAACTGTAATTAATATACGATCTAACGGTATTACCTTAGATCGAATACCTTTATTTGTTTGATCAGTAGTAATTACAGCTGTATTATTATTATTATCTTTA	64	0	18	3	0	0	1	0	1	2	0	0	0	0	0	0	0	0	0	11	0	4	0	0	0	0	0	0	0	0	0	0	0	0	0	0	0	0
OTU_1036	Arthropoda	Insecta	Lepidoptera				85.39	Private	TTTAAGTAGTGTTGAAGCTCATTCAGGTCCTTCGGTTGATTTAGCTATTTTTAGTCTTCATTTAGCCGGAGCTTCGTCAATCTTAGGGGCTATTAATTTTATTACAACTATTTTTAATATGCGTGCACCTGGGTTAACTATGCATCGTTTACCGTTATTAGTTTGAGCGGTTTTAATTACAGCTTTTTTATTATTACTATCTTTA	43	0	5	0	1	0	0	0	1	2	0	0	1	0	0	0	0	0	0	16	1	5	3	1	0	3	0	0	0	1	0	2	0	0	0	0	0	0
OTU_1051	Arthropoda	Insecta	Coleoptera				85.64	Private	TTTATCTAGTATAATCGCACACTCTGGTGGATCTGTTGATTTAGCTATCTTCAGTTTACATTTATCAGGGGTTTCATCTATTGCTGGTGCTATTAATTTTATGACAACAATTATTAATATGCGTGTACCTGGTATGACTATTTATAGAATGCCTTTATTTatttgagctttatttttaactgcttttttattagtttttacttta	0	0	0	0	0	0	0	0	0	0	0	0	0	0	0	0	0	0	0	22	0	0	0	0	0	0	0	0	0	0	0	0	0	0	0	0	0	0
OTU_1055	Arthropoda	Insecta	Lepidoptera				86.52	Published	ACTATCAAGTTTACAATCACACTCAGGGGCTTCTGTAGATTTAGCTATATTTAGTTTACATTTAGCCGGAGTTTCTTCTATTTTAGGAGCAATTAACTTTATTGTAACTATTTTAAATATGAGATGCCCAGGAATGTTTATGCATAAAATTCCATTATATGTTTGAGCAGTTTTTATTACGGCATTTTTATTATTATTTTCTTTA	0	3	0	4	0	0	0	1	0	0	0	0	0	0	0	0	0	0	0	0	0	0	0	0	0	1	0	0	0	0	0	3	1	0	0	0	0	0
OTU_1056	Arthropoda	Insecta	Lepidoptera				86.24	Private	TTTAAGTAGTGTAGCTAGTCACTCTGGAGGTTCTGTTGATTTAGCTATTTTTAGTCTTCATTTATCTGGTATCAGTAGTCTTTTAGGAGCAATTAACTTTATTACAACTATTTTCAATATGCGTGGCCCAGGTATGACAATGCATCGACTTCCTCTATTTGTATGGGCTGTATTAATTACTGCGTTTTTGTTATTATTATCATTA	12	15	11	6	0	1	0	1	3	2	2	0	1	7	2	2	1	0	2	0	0	0	0	0	0	0	0	0	0	0	0	0	0	0	0	0	0	0
OTU_1064	Arthropoda	Insecta	Coleoptera				86.76	Private	TTTATCTAGTATTACTGCTCATTCAGGGGGTTCTGTAGATTTAGCAATTTTTAGTTTACATTTATCTGGTGTTTCTTCAATAGCTGGTGCTATTAATTTTATGACTACAATAATAAATATGCGTGTAAAAGGTATGACTTTATATCGTTTACCTCTTTTTATTTGAGCTTTGTTCTTAACTGCCTTTTTATTAGTATTAACTCTA	28	4	17	14	1	1	1	3	3	15	5	1	2	3	3	0	2	3	1	9	2	0	0	0	0	0	0	0	0	0	0	2	0	0	0	0	0	0
OTU_1077	Arthropoda	Insecta	Hymenoptera				86.84	Published	TTTATCTGATACACCTTATACTATTAATGGTACTGTTGATTTAGCTATTTTTAGTCTACATTTAGCTGGTTTATCTTCATTATTAGGTGCTATTAATTTAATTAGTACTATCATGAATATGAGAATTATGAATATGGAAAAACTTCCTTTATTTGTTTGGAGTATATTAATTACAGCTTGGTTATTATTAATATCTTTA	69	11	0	5	0	0	0	0	0	0	0	0	0	0	0	1	0	0	0	0	0	0	0	0	0	0	0	0	0	0	0	0	0	0	0	0	0	0
OTU_1091	Arthropoda	Insecta	Lepidoptera				87.64	Private	ATTATCTGGTATTATTGCACATTCAGGAGGTTCTGTTGATTTAGCTATTTTTAGTTTACATTTAGCTGGTATTTCTTCATTATTAGGTGCAATTAATTTTATTACTACTGTTTTTAATATGCGTGTTTCTAATATGAATTTATATGAAATACCTTTATTTTGTTGAGCTATTTTAATAACTGCTTTTTTATTATTATTATCATTA	30	6	17	9	2	1	1	2	3	1	0	0	0	1	3	0	0	0	2	3	0	0	1	0	0	0	0	0	0	0	0	0	0	0	0	0	0	0
OTU_1113	Arthropoda	Insecta	Coleoptera				85.29	Private	TTTATCTGGGATTACTGCTCACTCTGGTGGTTCTGTTGATTTAGCAATTTTTAGTTTACATTTATCAGGTGTTTCTTCAATTGCAGGTTCAATTAATTTCATGACAACAATAATTAATATGCGTGTAAAAGGTTTAACCTTGTATCGtttacctttatttatttgagctgtttttttaactgcttttttattagttttaacttta	0	2	0	0	4	2	0	0	0	5	5	6	0	0	0	0	0	0	0	0	0	0	0	1	0	0	0	0	0	0	2	0	0	0	0	0	0	0
OTU_1145	Arthropoda	Insecta	Lepidoptera				85.39	Private	TTTATCAGGTATAGAAAGCCATTCAGGTGGATCTGTAGATTTAGCTATTTTTAGTTTACACTTAGCAGGTGCATCATCAATTTTAGGTGCTATGAATTTTATTACAACTGTTTTCAATATGAGAACACCTGGATTAAAAATGCATAGAATGCCTTTATTTGTATGAGCTATTTTTATTACAGCATTTTTATTAATATTATCTTTA	0	3	13	1	2	0	2	1	0	1	0	0	1	0	3	0	1	0	0	5	3	8	0	3	0	1	0	0	0	2	0	0	0	0	0	2	0	2
OTU_1147	Arthropoda	Insecta	Lepidoptera				88.76	Private	TTTATCTAGCATTCAAGCACATTCTGGTGCTTCAGTTGATTTAGCAATTTTTAGTTTACATTTAGCAGGTATTTCTTCTATTTTAGGTGCTGTTAATTTTATTACAACAATTTTAAATATGAGACCTGAAAAAATGAGCATGCATTTATTACCTTTATTTGTGTGGGCTGTTTTAATTACAGCAGTATTATTATTATTATCTTTA	45	7	20	3	0	2	1	0	0	1	0	0	2	3	1	1	1	1	1	12	1	4	0	0	0	1	0	0	0	0	0	0	0	0	0	2	0	0
OTU_1154	Arthropoda	Insecta	Lepidoptera				85.39	Published	TTTATCGAGTATTGAGAGTCATTCAGGTGGTTCAGTTGATCTTGTTATTTTTAGTTTACATTTAGCAGGAGTTTCATCTTTGTTAGGAGCTATTAATTTTATTACTACTATTTGTAATATGAGATTACCTAATATGACATGGAATCGTATTCCATTATTTGTTTGGGCTGTTTTTATTACAGCTATTTTATTATTATTGTCATTA	17	0	0	0	3	0	0	0	0	0	1	0	0	0	0	0	0	3	0	0	0	0	0	7	0	0	0	0	0	0	0	0	0	0	0	0	0	0
OTU_1162	Arthropoda	Insecta	Odonata				85.78	Private	ATTAAGTAGTATATTATCTCATTCAGGTCCTTCAGTAGATTTAGCCATTTTTAGTTTACATTTATCAGGAGCAGCTTCTATTTTAGGTTCTATTAATTTCATAACTACTGTTTTTAATATGCGCTCACCAGGATTAGCAATGCATAGAATTCCTTTATTCGTTTGGGCGTTATTAATTACTTCTTTTTTATTATTACTTTCTTTA	2	2	5	5	1	0	0	2	0	0	2	0	3	1	0	0	2	0	0	3	0	3	2	2	1	0	0	1	0	1	0	1	0	0	0	0	0	0
OTU_1163	Arthropoda	Insecta	Lepidoptera				85.39	Private	TTTATCTAGTATTCAAGCACATTCTGGTGCTTCAGTTGATTTAGCAATTTTTAGTTTGCATTTAGCAGGTATCTCTTCGATTTTAGGTGCTGTTAATTTTATTACAACAATTTTAAACATGAGACCTGAAAAAATGAGCATGCATTTACTACCTTTATTTGTTTGGGCCGTTTTAATTACAGCAGTATTATTATTATTATCTTTA	61	16	16	2	5	0	1	0	0	0	0	4	2	1	0	0	1	1	0	0	0	0	0	0	0	0	0	0	0	0	0	0	0	0	0	0	0	0
OTU_1171	Arthropoda	Insecta	Lepidoptera				86.52	Published	ACTTGCAAGTATAGAATATCATTCTGGAGGTTCTGTGGATTTAGCAATCTTTAGTTTACATTTAGCGGGAATTTCATCTATTTTAGGTGCTACTAATTTTATTACTACAATTTTGAATATGAGAGCTCCAGGAATTACTATGCATAAATTACCTTTATTCGTTTGAGCCGTATTTATAACAGCTTGATTATTATTATTATCTTTA	0	3	0	2	0	0	0	1	0	2	0	1	0	2	3	6	0	0	1	0	0	0	1	0	3	0	0	0	0	3	0	0	3	0	0	0	0	0
OTU_1214	Arthropoda	Insecta	Lepidoptera				85.39	Private	GTTATCAGGAATAGAAAGCCATTCCGGGGGATCAGTTGATTTAGCGATATTTAGTCTACATTTAGCAGGGGCTTCTTCTATTTTAGGAGCGATTAATTTTATTACAACAGTAATAAATATGAGACCTAAAAAATTAAAAATGCATCGAATTCCATTGTTTGTTTGAGCAGTTTTTATCACTGCTTTTTTATTATTATTATCTTTA	20	0	0	0	0	0	0	0	0	0	0	0	1	0	0	0	0	0	0	2	0	0	0	0	0	0	0	0	0	0	5	0	0	0	0	0	0	0
OTU_1217	Arthropoda	Insecta	Lepidoptera				85.39	Published	TTTAAGTAGTATACAAAGTCATTCTTCTGCTGCTGTTGATTTAGCTATCTTCAGTTTACATTTATCAGGTATTTCTTCTATTTTAGGTGCTATTAATTTTATTACTACTATTTTTAATATGCGTGCTCCTGGTATGAAAATGCATCAATTACCTCTTTTTGCTTGAGCCGTTTTAATTACTGCTTTTCTTTTATTATTATCTCTT	18	6	15	2	0	0	3	0	2	0	1	1	0	3	0	2	0	2	0	1	0	0	0	0	0	1	1	0	0	0	0	0	0	3	0	0	0	0
OTU_1243	Arthropoda	Insecta	Lepidoptera				85.87	Published	TTTAGCAATAATAGAAAGTAAAGGTGTAGATTTTGCAATTTTTAGTATACATTTAGCTGGTATATCATCATTATTAGGTGCAATAAATTTTATTACAACTATTATAAATATGAGACATGTAGGTTTAAATATGCATATATTACCTTTATTTGTTTGAGCTGTTTTAGTTACAGCTGTGTTACTTTTATTATCATTA	0	0	0	0	0	0	0	0	0	15	0	3	0	0	0	3	0	0	0	0	0	0	0	0	1	0	0	0	0	0	0	0	0	0	1	0	0	0
OTU_1257	Arthropoda	Insecta	Hymenoptera				85.37	Private	ACTAGCTATTATTGAAAGTAAAGGTGTAGATTTTGCTATATTTAGTATACATTTAGCTGGTATTTCTTCTTTAATGGGAGCAATTAATTTTATAACGACAGTAATAAATATGCGTCATGTTGGTTTAAATATGCATATTGTACCTTTATTTGTTTGGGCTGTTTTAGTAACAGCTATTTTATTATTATTATCATTA	0	0	13	6	2	0	0	0	0	0	2	0	0	0	0	0	0	0	0	0	7	5	2	0	0	0	0	0	0	0	0	2	1	0	0	0	0	1
OTU_1281	Arthropoda	Insecta	Coleoptera				85.78	Private	TTTATCAGGTATTGGTTCTCATTCTGGTGGTGCTATAGATTTAGCTATTTTTAGTTTACATTTATCTGGTGTTTCTTCTATTGCTGGTTCTATTAATTTTATGACTACAATTATAAATATGCGTGTTAAAGGTTTGACTATGTATCGTATGCCTTTATTTATTTGAGCCCTTTTTTTAACAGCTTTCTTATTAGTTTTAACTTTA	0	0	52	11	0	0	0	5	0	0	0	1	0	0	0	0	0	0	0	0	0	6	0	0	0	0	0	0	0	0	0	0	0	0	0	0	0	0
OTU_1315	Arthropoda	Insecta	Lepidoptera				86.52	Published	ATTATCTAGTATTATTGCACATTCAGGAGGTTCTGTTGATTTAGCTATTTTTAGTTTACATTTAGCTGGTATTTCATCTTTATTAGGTGCTATTAATTTTATTACTACTGTATTTAATATGAGAGCTAATGATATGAGTATATATCAAATACCTTTATTTTGTTGAGCTGTTTTTATAACTGCTTTTTTATTATTATTATCATTA	0	0	13	5	0	2	2	1	0	5	0	0	3	2	1	1	0	0	0	0	0	3	0	0	0	0	0	0	3	0	0	0	0	0	0	0	0	0
OTU_1335	Arthropoda	Insecta	Hemiptera	Cicadellidae	Idiocerus		100	Private	GCTATCTTCAAATATTGCTCATTCTGGACCAAGAGTTGATTTGGCTATTTTTTCTTTACATTTAGCAGGTATTTCTTCTATTTTAGGGGCAGTAAATTTTATTACTACAGTAATTAATATACGATCTTCAGGTATAACTTTTGATCAAACTCCATTATTTGTTTGATCTGTTCTTATTACAGCTGTTTTATTATTACTTTCATTA	0	0	0	0	0	0	0	0	0	0	0	0	0	0	0	0	0	0	0	30	0	0	0	0	0	0	0	0	0	0	0	0	0	0	0	0	0	0
OTU_1338	Arthropoda	Insecta	Lepidoptera				86.52	Private	TTTAAGTGGAATTACTTCTCATTCAGGTCCAGGTGTAGATTTAGCAATTTTTAGTTTACATTTATCTGGTGCTGCGTCAATTTTAGGAGCAATTAACTTTATTACAACTATCTTTAATATGCGCGCAAATGGAATGTATATGTTCCGTATGCCTTTATTTGTTTGAGCAGTTTTAATTACCGCTTTTTTATTGTTATTATCTTTA	27	4	5	2	0	0	0	2	2	0	0	0	0	0	0	0	1	0	0	13	0	4	0	0	0	2	0	0	2	0	0	0	0	0	0	0	0	0
OTU_1341	Arthropoda	Insecta	Lepidoptera				85.39	Published	TTTAAGTAGTATTTTAAGCCATTCTTCTGCTGCTGTTGATTTAGCTATTTTTAGTTTACATTTAGCTGGTATTTCTTCTATTCTTGGGGCTATTAATTTTATTACTACTATTTTTAATATGCGTAGTCCCGGTCTAGGTATGCATCAATTACCTCTTTTTGTTTGATCTGTTTTAATTACTGCTTTTTTATTAGTTTTATCTCTA	0	0	0	0	4	0	2	0	0	0	0	0	0	1	0	0	0	0	0	11	0	0	0	0	0	0	0	0	0	0	0	0	0	0	0	0	0	0
OTU_1342	Arthropoda	Insecta	Lepidoptera				85.39	Published	TTTAAGTAGTATTCAAAGTCATTCATCTGCAGCTGTAGATATTGCAATATTTAGTTTACATTTAGCTGGTATATCTTCTATTTTAGGTGCAATTAATTTTATTACAACTATTTTAAATATGCGTGCACCTGGTTTAGCTATGCATCAATTACCTTTATTTGTATGAGCAGTATTGATAACAGCAATTCTTTTAGTATTATCATTA	0	0	0	0	0	0	0	0	0	6	0	0	1	0	0	0	1	0	0	0	0	0	0	0	0	0	0	0	2	0	0	0	0	0	0	0	0	0
OTU_1371	Arthropoda	Insecta	Coleoptera				85.78	Private	TTTATCTAGTATTACAGCGCATTCTGGTGGTTCAGTAGATTTGGCAATTTTTAGTTTACATTTATCTGGTGTCTCTTCAATTGCTGGTGCTATTAATTTTATGACCACTATAATAAATATGCGTGTAAAAGGTATGActttataccgtttacctctttttatttgagctttatttttaactgcttttttatTGGTATTAACATTA	0	0	36	10	0	0	0	0	0	0	0	0	0	4	0	0	0	0	0	0	0	5	0	0	0	0	0	0	0	0	0	0	0	0	0	0	0	0
OTU_1382	Arthropoda	Insecta	Lepidoptera				85.39	Published	ACTAAGTTCAGTTCAAGCTCATTCAGGTCCATCTGTCGATCTTGCAATTTTTAGCTTACATTTAGCAGGAGTTTCGTCAATTTTAGCCTCAATAAATTTTATTACAACTATTTTTAATATGCGAGTTCCAGGGTTATCTATGCATCGTATTCCACTTTTTGTATGGGCAATCTTAATTACTTCTTTTTTACTACTTTTATCTTTA	0	0	3	0	0	0	1	0	0	0	0	0	2	0	0	0	0	0	0	15	0	2	0	0	0	0	0	2	2	0	0	0	1	0	0	0	0	2
OTU_1386	Arthropoda	Insecta	Lepidoptera				86.52	Published	ATTAGCAGGTATTCTAGGTCACCCATCGAGTTCTGTTGATTTCGCAATATTCAGTTTACATTTGGCGGGTATATCTTCAATTTTAGGTGCAATTAATTTTATTACCACTATTTTTAATATGAAAGCAAGAGGTATGCACTTATATCAAATGCCTCTGTTTGTATGATCCGTTTTAATTACAGCTTTTTTGTTATTACTTTCTTTA	0	8	0	1	0	0	2	0	1	0	3	0	6	0	0	0	0	0	0	0	0	0	0	0	0	0	0	0	0	0	0	0	0	0	0	0	0	0
OTU_1394	Arthropoda	Insecta	Odonata				87.63	Private	TTTATCCGGAAATATTGCCCATTCAGGACCAGCAGTTGATTTAGCAATTTTTAGTTTACATATTTCAGGTGCATCATCAATTTTAGGATCTATTAATTTTATTATTACGATTACAAATATGCGTGCACGTGGAATGACAATGTATATGTTACCATTATTTGCATGATCGATTTTAATTACAGCATTTTTACTTGTTTTATCATTA	33	0	0	0	1	0	2	0	0	0	2	2	0	0	0	0	0	0	0	7	0	0	0	0	0	0	0	0	0	0	0	0	0	1	0	0	0	0
OTU_1419	Arthropoda	Insecta	Lepidoptera				87.01	Private	GTTAGCGAGTACCCAATCACATTCAGGACCTTCAGTTGATTTAGCGATTTTTAGCTTACATTTAGCTGGGGTTTCTTCTATTTTAGGTGCAATTAATTTTATTGTAACTATTTTAAATATGAGATGTCCTGGAATGTTTATGCATAAAATTCCTTTGTATGTATGAGCTGTTTTTATAACTGCATTTTTATTAGTATTTGCATTG	0	0	5	5	0	0	0	1	0	7	3	0	0	0	0	0	1	0	0	10	0	0	0	0	0	0	0	0	0	0	0	0	0	0	0	0	0	0
OTU_1493	Arthropoda	Insecta	Coleoptera				87.75	Private	GTTATCTAGTATTGCTGCGCATTCTGGTGGTTCTGTAGATTTAGCTATTTTTAGCTTACATTTATCAGGTATTTCTTCAATTGCTGGTGCTATTAATTTTATGACTACAATTATTAATATGCGTGTAAAAGGTTTAACTATGTATCGTATGCCTTTATTTATTTGATCTCTTTTTTTAACTGCATTTTTACTTGTTTTAACTTTA	0	0	0	0	16	0	0	0	0	0	0	0	0	0	0	0	0	0	0	0	0	0	0	4	0	0	0	0	0	0	0	0	0	0	0	0	0	0
OTU_1497	Arthropoda	Insecta	Lepidoptera	Geometridae			92.13	Published	TTTATCTAGTGCACAAGCACATTCAGGACCTTCAATAGATTTAGCTATTTTTAGTTTACATTTAGCAGGAATTTCATCTATTTTAGGTGCAATTAATTTTATTACTACAATTTTTAATATGCGTGCACCTGGAATATATTTTCATAAATTACCTTTATTCGTTTGGTCTGTTTTAATTACAGCTTTTTTATTATTATTATCTTTA	8	7	16	4	0	2	0	0	2	0	0	0	5	4	0	0	3	1	0	0	0	0	0	0	0	0	0	0	0	0	0	0	0	0	0	0	0	0
OTU_1519	Arthropoda	Insecta	Hymenoptera	Formicidae	Lasius		100	Published	ATTAGCTTCTAATATTTTTCATAATGGTCCCTCAGTTGATTTAACTATTTTTTCTCTTCATATTGCTGGAATATCTTCTATTCTAGGAGCTATCAATTTTATTTCAACTATTATAAATATACATCATAAAAATTTTTCTATCGATAAAATTCCCTTACTTGTATGATCAATTTTAATCACTGCAATTTTATTACTTTTATCCCTC	0	4	0	0	0	0	0	0	0	3	0	0	0	0	0	0	0	0	0	0	5	0	0	0	0	0	0	0	1	0	0	0	0	0	0	0	0	0
OTU_1547	Arthropoda	Insecta	Odonata				89.22	Private	ATTATCTGGTAATATTGCACATTCTGGGCCAGCTGTTGATTTAGCAATTTTCAGTTTACATATTTCTGGTGCTTCATCAATTCTAGGATCTATTAATTTTATTATTACAATTACTAACATGCGTGCACGTGGTATGACTATGTATATGTTACCATTATTTGCCTGATCTGTGTTAATTACTGCATTTTTACTTGTTTTATCATTA	33	7	0	8	0	1	0	1	0	0	0	0	0	0	0	0	0	0	0	3	0	0	0	0	0	0	0	0	0	0	0	0	0	0	0	0	0	0
OTU_1560	Arthropoda	Insecta	Lepidoptera				85.39	Private	ATTATCAGGAATTGAAAGCCATTCAGGAGGTTCTGTAGATTTAGCAATATTTAGTTTACATTTAGCAGGTGCTTCTTCAATTTTAGGAGCAATCAATTTTATTACTACTGTATTAAATATGCGAGTGCCTGGTTTAAAAATGCATAAAATTCCTTTATTTGTTTGAGCAATTTTTATTACTGCAATTTTATTATTATTATCTTTA	30	0	0	0	0	0	0	0	1	0	1	2	0	0	0	1	0	0	0	0	0	2	0	0	2	0	0	0	0	0	0	0	0	0	0	0	0	0
OTU_1602	Arthropoda	Insecta	Coleoptera				86.76	Published	ATTATCTGGAAATGAAGCTCATTCTGGTGCATCTGTTGATTTAGCTATTTTTAGTTTACATTTGGCCGGTGCTTCTTCTATTGCTGGTGCAATAAATTTTATAACAACTATAATTAATATGCGCGGTGGTGgactttatttttatagattacctttatttgtttgaagtgtttttattaccgcttttttGCTTTTACTTTCTTTA	29	4	9	0	1	0	2	1	0	0	0	0	0	1	0	2	0	0	2	0	0	0	0	0	0	0	0	0	0	0	0	0	0	0	0	0	0	0
OTU_1631	Arthropoda	Insecta	Lepidoptera				87.64	Private	TTTAGCAAGTATTGCAGCACATTCAGGTGCATCTGTAGATTTAGCAATATTTAGTTTACATTTAGCAGGTATTTCATCAATTTTAGGTGCAATTAATTTTATTACAACAGTAATAAATATGAGAGCACCAGGTATTTATATGCATAGATTACCATTATTTGTTTGGGCAGTATTTTTAACAGCTATTTTATTGTTATTATCATTA	15	0	10	0	1	0	2	4	0	0	0	0	0	0	1	0	0	0	0	5	0	0	0	0	0	0	0	0	0	0	0	0	0	0	0	0	0	0
OTU_1632	Arthropoda	Insecta	Lepidoptera				85.39	Private	ATTAGCCGGGATTGAAGCACATTCCGGGGGTTCTATAGATTTAGCTATTTTTAGTTTACATTTAGCAGGGCTTTCTTCGTTATTAGGTTCAATTAATTTCATTACAACAATTGTTAATATGAGATCTCCAGGGTTATATATGCATCGTTTACCATTATTCGCTTGGGCTATGTTAATAACGGCATTTTTATTATTATTATCATTA	5	0	0	0	0	0	2	0	0	6	0	0	2	1	0	0	0	0	0	0	0	0	0	0	0	0	0	0	0	0	0	0	0	0	0	0	0	0
OTU_1684	Arthropoda	Insecta	Lepidoptera				85.87	Private	ATTAGCTATATTAGAAAGTAAAGGGGTAGATTTTGCTATATTTAGTATACATTTAGCAGGTATATCTTCTTTATTAGGTGCTATAAATTTTATTACAACAATAATCAATATGCGTCATGTTGGATTAAATATGCATATTGTACCATTATTTGTTTGAGCTGTATTTGTAACAGCATTTTTATTATTATTATCATTA	24	0	0	0	0	0	0	0	0	0	0	0	0	0	0	0	0	0	0	8	0	0	0	0	0	0	0	0	0	0	0	0	0	0	0	0	0	0
OTU_1694	Arthropoda	Insecta	Lepidoptera				85.39	Published	ATTAGCAGGAATTGAAAGTCATTCTGGAGGTTCTGTTGATTTAGCAATTTTTAGTTTACATTTAGCTGGTGCCTCATCTATTTTAGGTGCAATGAACTTTATTACTACTGTAATTAATATGCGTACACCAGGAATGCAAATGCATAGAATTCCTTTATTTGTTTGAGCAATTTTTGTAACTGCGTTTTTATTATTATTATCATTA	27	0	0	0	0	0	0	0	0	0	0	0	0	0	0	0	0	1	0	0	0	0	0	0	0	0	0	0	0	0	0	0	0	0	0	0	0	0
OTU_1713	Arthropoda	Insecta	Lepidoptera				85.39	Published	TCTTTCAGGCGTACAAGCTCACTCAGGTGCTTCTGTAGATTTAGCTATTTTTAGTTTACACTTAGCTGGTATTTCTTCAATTTTAGGTGCTGTTAACTTTATTACAACTATTCTTAATATGAAACCTGAAAAGATGAACATGCATTTATTGCCTCTATTTGTATGGGCAGTATTAATTACTGCTGTTCTTCTTTTATTATCGTTA	7	10	0	8	0	0	0	0	1	0	0	0	0	0	2	0	0	0	0	4	0	0	0	0	0	0	0	0	0	0	0	0	0	0	0	0	0	0
OTU_1717	Arthropoda	Insecta	Lepidoptera				89.89	Private	TTTATCAAGCATAGAAGCACATTCTGGTGGTTCAGTTGATTTAGCTATTTTTAGTTTACATTTAGCTGGTGTTTCATCATTATTAGGTGCTATTAATTTTATTACAACGATTTTTAATATGAGATGTGGTAATTTAAGTATTTATAAAATGCCTTTATTTTCATGAGCAGTGTTAATTACGGCATTTTTATTATTATTATCTTTA	0	0	0	0	0	0	0	0	0	0	0	0	0	0	0	0	0	0	0	14	1	0	0	0	0	0	0	0	0	0	0	0	0	0	0	0	0	0
OTU_1760	Arthropoda	Insecta	Lepidoptera				85.39	Private	ACTTAGTTCTATAGTTGCTCATTCTGGAGGATCTGTCGATTTAGCTATATTTAGTTTACATCTAGCGGGTATTTCTTCATTATTAGGTGCAATAAATTTTATTACGACTATTTTTAATATGCGTGTTCCAGGCTTATCAATGCATAAATTACCTTTATTCGTGTGATCAATACTTATTACTGCCTTTTTACTACTTCTTTCTTTA	0	0	0	0	0	0	0	0	0	0	0	6	0	0	0	0	0	0	0	0	0	0	0	0	0	0	0	0	0	0	0	0	0	0	0	0	0	0
OTU_1765	Arthropoda	Insecta	Lepidoptera				86.52	Private	TTTATCGAGTATTCAAGCACATTCTGGTGCTTCAGTTGATTTAGCAATTTTTAGTTTACATTTAGCAGGTATATCTTCTATTTTAGGTGCTGTTAATTTTATTACAACAATTTTAAACATGAGACCTGAAAAAATGAGTATGCATTTATTACCTTTATTCGTTTGGGCAGTTTTAATTACAGCAGTATTATTATTATTATCTTTA	19	12	14	0	3	0	0	0	1	2	0	0	3	0	0	0	0	0	0	0	0	0	0	0	0	0	0	0	0	0	0	0	0	0	0	0	0	0
OTU_1790	Arthropoda	Insecta	Lepidoptera				85.39	Published	TTTAAGTAGTATTCAAGCACATTCTGGTCCATCCGTAGATTTAGCTATATTTAGTTTACATTTATCAGGTGCTGCATCTATTTTAGGAGCTATTAATTTTATTACAACTATATTTAATATGCGAGCACCTGGAATGAGTTTACATAGAATGCCGTTATATGTTTGGTCTATATTAATAACATCATTTTTATTATTATTATCATTA	11	1	0	0	0	0	0	0	0	0	0	0	0	0	0	0	0	0	1	0	0	0	0	0	0	0	0	0	0	0	0	0	0	0	0	0	0	0
OTU_1812	Arthropoda	Insecta	Lepidoptera				86.52	Published	TTTATCTGGTGTTGAAAGTCACTCAGGTGGAGCTGTAGATTTAGCTATTTTTAGTTTACATTTAGCTGGTGCATCATCTATTTTAGGAGCAATAAATTTTATTACAACAATAATAAATATGAGACCTTCTACTTTAAAAATGCATAATATGCCTTTATTTGTTTGAGCTATTTTTATAACAGCAATTTTATTATTATTATCTTTA	17	5	0	1	0	0	0	0	2	0	0	0	3	0	1	0	0	0	0	0	0	0	0	0	0	0	0	0	0	0	0	0	0	0	0	0	0	0
OTU_1813	Arthropoda	Insecta	Diptera				85.15	Published	ATTATCTTCTATTGAATTTCATTCAGGAGGATCAGTTGATTTAGCAATTTTTAGTTTACATTTAGCGGGTATTTCATCGATTTTAGGAGCTATGAATTTTATTACAACAATAATAAATATGAGAGCACCAGGAATGACAATGCATAGATTACCACTATTCGTTTGAGCTGTGTTAATTACAGCTGTTTTATTATTATTATCATTA	0	0	0	0	0	0	0	0	0	0	2	0	0	0	0	0	0	0	0	0	0	0	0	0	0	1	0	0	0	0	0	0	0	0	0	0	0	0
OTU_1817	Arthropoda	Insecta	Lepidoptera				85.39	Private	TTTAAGTGGTAATATAGCACATTCTGGAGGAGCTGTTGATTTAAGTATTTTTAGTTTACATATTGCTGGGGTTTCCTCAATAGCTGGAGCTTTAAATTTTATTACAACTATTTTTAATATGAAATCTGAAGGTTTACTTTTCAATAGGTTAGGTTTATATCCTTGATCTGTTTTAATTACTGCATTTTTATTATTATTATCATTA	4	3	0	0	0	0	0	0	0	0	0	0	0	0	0	0	0	0	0	4	0	0	0	0	0	0	0	0	0	0	3	0	1	0	0	0	0	1
OTU_1846	Arthropoda	Insecta	Lepidoptera				86.05	Private	TCTTAGCGGAGCTCAAGCTCATTCGGGTCCTTCAGTAGATTTAGCAATTTTTAGTTTACATTTATCTGGTGCTTCTTCAATTTTAGGAGCTATTAATTTTATTACAACTATTAATAATATGCGTTCTCCTGGAATGACTTATGTACGTATGCCTTTATATGTTTGGTCTGTTTTAATAACTTCATTTTTATTATTACTTTCATTA	5	0	5	0	0	0	0	0	0	0	3	0	1	2	0	0	0	2	0	5	1	0	0	0	0	0	0	0	0	0	0	0	0	0	0	1	0	0
OTU_1853	Arthropoda	Insecta	Lepidoptera				86.52	Published	TTTATCTGGTATTATTGCTCATTCAGGGGGATCAGTTGATTTAGCAATTTTTAGTTTACATTTATCTGGTATTTCTTCTATTGCAGGCTCAATTAATTTTATGACAACTATTATTAATATGAGAATATCAGGTTTAACTTGATTTCGATTACCTTTATTTATTTGATCGATGTTTTTGACAGCTTTTTTATTAGTTTTATCTTTA	14	0	0	0	0	0	0	0	0	0	0	0	0	0	0	0	0	0	0	1	0	0	0	0	0	0	0	0	0	0	0	0	0	0	0	0	0	0
OTU_1892	Arthropoda	Insecta	Coleoptera				92.31	Private	TTTATCTAGTATTGTTGCACATTCTGGTGGTTCTGTAGATTTAGCTATTTTTAGTTTACATTTAGCTGGTATTTCTTCAATAGCTGGTGCTATAAATTTTATGACTACAATTTTAAATATGCGTGTAAAAGGTATGACAATGTATAGAATACCTTTATTTATTTGATCTgtttttattacagcttttttattagtttttacttta	0	0	2	0	0	0	0	0	0	0	0	1	0	1	1	0	0	0	0	0	0	0	0	0	0	0	0	0	0	0	0	0	0	0	0	0	0	0
OTU_1914	Arthropoda	Insecta	Lepidoptera				85.39	Private	TTTAGCAAGTATTGAATACCATTCTGGAGCGAGTGTTGATTTAGCTATTTTTAGTTTACACTTAGCTGGTATTTCATCAATTTTAGGTGCTATGAATTTTATTACAACAATTTTAAATATGAGAGCACCAGGTATGACAATGCATAAATTACCTTTATTTGTATGATCAGTTTTCATTACAGCAATATTATTAATTTTATCATTA	0	0	0	0	0	0	0	0	0	0	0	0	0	0	0	0	0	0	0	0	0	0	2	0	0	0	0	0	0	0	0	1	0	0	0	1	0	0
OTU_1938	Arthropoda	Insecta	Coleoptera				90.26	Private	TTTATCAGGAATTGTAGCGCATTCTGGTGGATCTGTAGATTTAGCTATTTTTAGTTTACATTTATCTGGTGTTTCTTCTATTGCTGGTTCTATTAATTTTATGACTAGTATTATAAATATGCGTGTAAAAGGTATGACTATGTATAGAGTACCTTTATTTATTTGAGCTGTTTTTATTACCGCATTTTTATTAGTTTTTACATTA	7	5	5	0	3	0	0	0	0	4	0	0	0	0	0	0	0	0	0	0	1	0	2	0	0	0	0	0	0	0	0	0	0	0	0	0	2	0
OTU_1955	Arthropoda	Insecta	Coleoptera				86.02	Private	TTTAGCTGGTATTGGTTCTCATTCTGGTGGTGCTATTGATTTAGCTATTTTTAGTTTACATTTATCAGGTGTCTCTTCAATTGCAGGTTCTATTAATTTTATGACAACAATTATAAATATGCGTGTAAAAGGCTTAACTATGTATCGTATGCCTTTATTTATTTGAGCCCTTTTTTTAACTGCATTTTTATTGGTTTTAACTTTA	0	0	0	0	0	0	0	0	0	0	5	0	0	0	0	0	0	0	0	0	0	0	0	0	0	0	0	0	0	0	0	0	2	0	0	0	0	0
OTU_1965	Arthropoda	Insecta	Lepidoptera				85.39	Published	ATTAAGTGCTTTACAAAGCCACTCCTCTGCTGCAGTTGAATTAGCTATATTTAGTTTACATTTAGCGGGGGTTTCTTCGTTATTAGGGGCAATTAATATTATTACAACTATTTTTAATATGCGTACTTTAGGAATGACTATGCATCAAATACCTCTTTTTGTTTGGTCATTATTAATTACTGCATTTTTATTAGTTTTATCATTA	0	0	6	1	0	0	0	0	0	0	0	0	0	0	0	0	0	0	0	5	1	4	0	0	0	0	1	0	1	1	0	0	0	0	0	1	0	0
OTU_1971	Arthropoda	Insecta	Odonata				87.88	Private	ACTTTCAGGAAATATTGCACATTCTGGACCTGCTGTTGACTTAGCAATTTTTAGTTTACATATTTCTGGAGCTTCTTCTATTTTAGGATCAATTAATTTTATTATTACTATTACTAATATGCGTGCTCGTGGAATGACAATGTATATGTTACCATTATTTGCATGATCTGTTTTAATTACTGCTTTTTTACTTGTTTTATCATTA	0	0	0	3	0	0	0	0	0	0	0	0	0	0	0	0	0	0	0	0	0	0	0	0	0	0	0	0	0	0	0	0	0	0	0	0	0	0
OTU_1981	Arthropoda	Insecta	Lepidoptera				85.39	Private	TCTTTCAAGTATCCAATCACATTCAGGACCTTCTGTAGATTTAGCTATTTTTAGCTTACATTTAGCAGGGGTGTCTTCATTATTAGGAGCAATTAATTTTATTGTAACTATTTTAAATATGAGATGTCCTGGAATGTTTATGCATAAATTACCTTTATATGGGTGAGCAATTTTTATTACAGCATTTTTATTATTATTTTCTTTA	0	0	0	0	0	0	0	0	0	0	0	0	0	2	0	0	0	0	0	0	0	3	1	0	0	0	0	0	0	0	0	0	0	0	0	0	0	0
OTU_2012	Arthropoda	Insecta	Lepidoptera				89.89	Private	ATTATCTAGTATTGTAGCGCATTCAGGAGGTTCTGTAGATTTAGCTATATTTAGTTTACATTTAGCAGGTATATCTTCATTATTAGGTGCTATTAATTTTATTACAACAGTTTTTAATATGAGAGCTAATGATATGAGTATATATCAAATGCCTTTATTTTGTTGAGCTATTTTTATAACAGCATTTTTATTATTATTATCTTTA	14	0	0	0	0	0	0	0	0	5	0	0	0	0	0	0	0	0	0	3	0	0	0	0	0	0	0	0	0	0	0	0	0	0	0	0	0	0
OTU_2026	Arthropoda	Insecta	Lepidoptera				88.76	Private	ATTAGCATCAGCAGTAGCTCATTCAGGGCCAAGTGTAGATTTTGCAATTTTTAGTTTACATTTAGCAGGAGCATCATCAATTTTAGGAGCAATTAATTTTATTACAACAATTATTAATATGCGAGCACCAGGATTAACATTTACAAATTTAAATTTATTTGTATGGGCAGTATTTATTACAGCAATTTTATTATTATTATCATTA	0	0	0	4	0	0	0	0	0	0	0	0	0	0	0	0	0	0	0	9	0	0	0	0	0	0	0	0	0	0	0	0	0	0	0	0	0	0
OTU_2049	Arthropoda	Insecta	Lepidoptera				85.39	Private	ACTATCATCAATTGAATTTCATTCCGGTGGTTCTGTTGACTTAGCAATTTTTAGTTTACATTTAGCTGGAATATCTTCAATATTAGGTGCTATGAATTTTATAACAACAATAATTAATATGAGAGCACCAGGAATGACAATGCATAGACTACCATTATTTGTTTGATCTGTTTTAATTACAGCAGTATTATTATTATTATCTTTA	0	0	0	0	0	0	0	0	0	0	0	0	1	0	2	0	0	0	0	0	0	0	0	0	0	0	0	0	1	1	0	2	0	0	0	0	0	0
OTU_2054	Arthropoda	Insecta	Hymenoptera	Mymaridae	Anaphes		100	Private	ATTATCAATAAATGTATCTCATAGTGGTCCATCAGTTGATTTATCAATTTTTTCTTTACATTTAGCAGGAGCTTCTTCAATTATAGCATCAATTAATTTTATTACTACTATTTTAAATATAAAAAATTTTAATATAGAAAAAGTTACTTTATTTAGATGATCAATATTATTAACTGCAATTTTATTATTATTATCTTTA	0	0	0	0	0	0	0	0	0	0	0	0	0	0	0	0	0	0	0	3	0	0	0	0	0	0	0	0	0	0	0	0	0	0	0	0	0	0
OTU_2060	Arthropoda	Insecta	Hemiptera	Aphididae	Anoecia		100	Private	TCTTTCTAATAATATTGCTCATAATAATATTTCAGTAGATTTAACTATCTTTTCACTTCATTTAGCAGGAATTTCCTCTATCTTAGGAGCTATTAATTTTATTTGTACAATCCTAAATATAATACCTCAAAATTTAAAAATAAACCAAATTCCCCTATTCCCATGATCAATTTTAATTACAGCAACCTTATTAATTTTATCATTA	0	15	0	0	0	3	0	0	1	0	0	0	0	0	0	0	0	1	0	0	0	0	0	0	0	0	0	0	0	0	0	0	0	0	0	0	0	0
OTU_2061	Arthropoda	Insecta	Diptera				85.37	Published	ATTAAGTAGTATAGCATATACAAGTAGTCCAGCAGTAGATTTAGCAATATTTTCATTACATTTAGCAGGGGTATCATCATTATTAGGGGCAATAAATTTCATAACAACAATAATAAATATGAGATCACCATTAATAACATTTGATAAATTACCATTATTTGCATGAGCAGTATTAATAACAGCAGTATTATTATTATTATCATTA	12	0	0	0	0	0	0	0	0	0	1	0	0	0	0	0	0	0	0	6	0	0	0	0	0	1	0	0	0	0	0	0	0	0	0	0	0	0
OTU_2090	Arthropoda	Insecta	Lepidoptera				86.52	Published	ATTATCTGGTATTATAGCACATTCTGGTGGTTCTGTAGATTTAGCAATTTTTAGTTTACATTTAGCTGGAGTTTCTTCTTTATTGGGTGCTATTAATTTTATTACAACTATTTTTAATATGAGAGCAAGTAATTTAAGTTTATATCAATTACCTTTATTTTGTTGAGCTATTTTAATTACTGCTTTTTTATTATTATTATCTTTA	5	0	7	0	0	0	0	0	0	0	0	0	0	0	0	0	0	0	0	5	0	0	1	0	0	0	1	0	2	0	0	0	0	0	0	0	0	1
OTU_2095	Arthropoda	Insecta	Lepidoptera	Depressariidae			94.5	Private	TTTAAGCAGTATTGCAAGTCACTCTGGTGGCGCTGTAGATTTAGCTATTTTTAGTCTTCATTTATCCGGTATTAGTAGTATTTTAGGAGCTATTAATTTTATTACTACTATTTTTAATATGCGTGGACCTGGTATGACAATGCATAGACTTCCATTATTTGTGTGGTCTATTTTAATTACTGCGTTTTTATTATTGCTTTCTCTT	18	0	0	1	0	0	0	0	0	1	0	0	2	0	0	0	0	0	0	0	0	0	0	0	0	0	0	0	0	0	0	0	0	0	0	0	0	0
OTU_2097	Arthropoda	Insecta	Lepidoptera				86.52	Private	TTTAAGTAGTTTATTAGGTCATCCAACACCAGCAGTAGATATCGCAATTTTTAGTTTACATTTAGCGGGTATTTCTTCTATATTAGGTGCTATTAATTTCATAGCTACAGTTATTAATATGAGACCTGCAGGTTTAACAATGGGTAGACTTCCATTATTTGTATGGGCTGTATTTATTACAGCATTTTTATTATTATTATCTTTA	20	0	0	0	1	0	0	0	0	0	0	0	0	0	0	0	0	0	0	0	0	0	0	0	0	0	0	0	0	0	0	0	0	0	0	0	0	0
OTU_2119	Arthropoda	Insecta	Lepidoptera				86.52	Private	TTTATCTAGTATAAATGGTCATTCTGGTCCTTCTGTAGATCTTGCTATTTTTAGTTTACATTTAGCTGGTATTTCTTCAATTTTTGGTGCCATTAATTTCATTACTACAATATTAAATATGCGTTTACCTAATTTACATTTTTATCGTTTACCTTTATTTGTGTGAAGTGTTTTGATAACAGCATTTTTATTATTATTATCTTTA	24	0	0	0	0	0	0	0	0	0	0	0	0	0	0	0	0	0	0	0	0	0	0	0	0	0	0	0	0	0	0	0	0	0	0	0	0	0
OTU_2121	Arthropoda	Insecta	Hymenoptera	Braconidae	Lysiphlebus		100	Private	TTTATCTTTAACTTTAGGACATAGAGGTGTTGCTGTAGATTTTGCAATTTTTTCTTTGCATTTAGCAGGTATTTCTTCTATTATAGGGGCAATTAATTTTATTAGAACTATTTTTAATATACGTCCTTATAATATTAAAATAGATCAAATTTCTTTATTAGTTTGGTCAGTGTTAATTACTGCTGTTTTATTATTATTATCTTTA	0	0	0	0	0	0	0	0	0	2	0	0	0	0	0	0	0	0	0	0	0	0	0	0	0	0	0	0	2	0	0	0	0	0	0	0	0	0
OTU_2147	Arthropoda	Insecta	Lepidoptera				86.52	Private	TCTTTCGAGCGTTCAGGCTCATTCTGGCCCCTCAGTTGATTTAGCAATTTTTAGTTTACATTTAGCAGGTATTTCATCAATTGCAGGAGCGATTAATTTTATTACAACAATTTTGAATATGCGTGCGCGTGGTTTAACTATGCATCGTTTACCTTTATTTGTCTGAGCTATTTTTATTACAGCTTTTCTATTATTATTATCATTA	17	0	0	0	0	0	0	0	0	0	0	0	0	0	0	0	0	0	0	0	0	0	0	0	0	0	0	0	0	0	0	0	0	0	0	0	0	0
OTU_2178	Arthropoda	Insecta	Hemiptera				85	Published	TTTAGCTATTATAGAAGAAAAAGGGGTTGATTTTGCTATTTTTAGTTTACATTTAGCTGGTATTTCTTCTTTATTAGGTGCTATAAATTTTATAAGTACTATAATTAATATGCGTCATGCTGGTTTAAATTTTCATATAACACCTTTATTTGTATGAGCTGTTTTAGTTACAGCTTTTTTATTATTATTATCTTTA	0	0	0	5	0	0	0	0	1	0	0	0	1	1	0	0	0	0	0	0	0	0	0	0	0	0	0	0	0	0	0	0	0	0	0	0	0	0
OTU_2188	Arthropoda	Insecta	Hymenoptera	Eucharitidae			92.42	Private	TTTAAGTTCTATTTTGGCTCATTCAGGATGTGCCGTGGATTTGGCTATTTTCAGTTTACATATAGCCGGTATCTCTTCTATCGCGGGAGCTATTAATTTTATAGTAACCATCATTAATATGAGATGCCCTGGTTTATATCTGCGTAGATTACCTTTGTTTGTTTGAGCTGTATTGATTACTGCTATTTTATTGCTTTTATCACTA	0	0	0	6	0	0	0	0	0	0	3	0	0	0	0	0	0	0	0	0	0	0	0	0	0	0	0	0	0	0	0	0	0	0	0	0	0	0
OTU_2192	Arthropoda	Insecta	Lepidoptera				87.64	Private	ATTATCAGGTATTATTGCACATTCTGGAGGTTCTGTTGATTTAGCTATTTTTAGTTTACATTTAGCAGGTATTTCTTCATTATTAGGTGCTATTAATTTTATTACAACTGTTTTTAATATGCGTGTTTCTAATATGAATTTATATGAAATACCTTTATTTTGTTGAGCTATTTTAATTACAGCTTTTTTATTATTATTATCATTA	0	0	11	2	0	0	0	0	2	0	0	0	0	3	0	0	0	0	0	0	0	0	0	4	0	0	0	0	0	0	0	0	0	0	0	0	0	0
OTU_2219	Arthropoda	Insecta	Lepidoptera				85.39	Private	TTTATCTAGTATTCAAGCACACTCTGGAGCTTCAGTTGATTTAGCAATTTTTAGTTTACATTTAGCTGGTATTTCTTCTATTTTAGGTGCTGTTAATTTCATTACAACAATTTTGAATATGCGGCCTGAAAAAATGAGTATGCATTTATTACCACTGTTTGTTTGGGCAGTATTAATTACTGCGGTATTATTATTATTATCTTTA	8	0	0	2	0	0	1	0	0	0	0	0	0	0	0	0	0	0	0	0	0	0	0	0	0	0	0	0	0	0	0	0	0	0	0	0	0	0
OTU_2221	Arthropoda	Insecta	Lepidoptera				85.39	Private	ATTGTCTGGTATTATTGCACATTCTGGAGGTTCTGTTGATTTAGCTATTTTTAGTTTACATTTAGCTGGTGTATCTTCATTATTAGGTGCTATTAATTTTATTACAACTGTATTTAATATGAGAGTAAGTTCTATGAGTTTATATGAAATACCTTTATTTTGTTGAGCTGTATTAATTACGGCTTTTTTATTATTATTATCTTTA	0	0	0	0	0	0	0	0	0	0	0	0	0	0	0	0	0	0	1	0	0	0	0	0	0	0	0	0	0	0	0	0	0	0	0	0	0	0
OTU_2268	Arthropoda	Insecta	Lepidoptera				85.39	Private	TTTATCAGGAATTGAAAGTCATTCTGGAGGTTCTGTTGATTTAGCAATTTTTAGTTTACATTTAGCCGGTGCATCATCAATTTTAGGTGCTATTAATTTTATTACTACTGTTATCAATATGAGATCTCCAAATCTAAAAATGCATAGAATACCTTTATTTGTTTGAGCAGTATTTATAACAGCAATTTTATTATTATTATCATTA	13	5	0	1	0	0	1	1	0	1	1	2	0	0	0	2	0	1	0	0	0	0	0	0	0	0	0	0	0	0	0	0	0	0	0	0	0	0
OTU_2328	Arthropoda	Insecta	Hemiptera	Nepidae	Ranatra		97.01	Private	TTTAGCCTCTTATCAATACCATTCTGGACCTGCTGTTGATCTTGCAATTTTTAGTTTACATTTAGCAGGTGTTTCTTCCTTAGCAGGTGCTATGAATTTTATTGCTACTATTTTAAATATGCGTGTTCCTGGTATGGATATGTTACGCATGCCTTTATTTCCATGATCCGTTTTTATTACTGCGATTATGTTATTATTATCCTTG	0	0	0	0	0	0	0	0	0	0	0	0	3	0	0	0	0	0	1	0	0	0	0	0	0	0	0	0	0	0	0	0	0	0	0	0	0	0
OTU_2335	Arthropoda	Insecta	Coleoptera				88.54	Private	GCTATCGAGTGCTATTGCGCATTCAGGTGGATCTGTAGATTTAGCAATTTTTAGTTTACATTTAGCTGGTGTTTCATCAATTGCAGGTGCTATTAATTTTATGACAAGTATTATGAATATGCGTATTAAAGGAATGACTATGTATAGAGTACCTTTATTTATTTGATCTGTTTTTATTACAGCATTTTTATTAGTTTTTACATTA	0	4	2	2	0	0	0	0	0	0	0	0	0	0	0	0	0	0	0	0	1	2	0	0	0	0	0	0	0	0	0	0	0	0	0	0	0	0
OTU_2339	Arthropoda	Insecta	Hymenoptera				85.57	Private	ATTAAGTTCCATTTTAGCCCATTCAGGTTGTGCTGTGGATTTAGCTATATTTAGTTTACATATAGCGGGTATTTCATCGATCGCCGGTGCTATTAATTTTATAGTAACTATTGTAAATATGAGATGTCCTGGTATGTATTTTAGAAGATTGCCTTTATTTGTTTGAGCTGTTTTAATTACGGCTATTTTATTACTATTATCTCTC	0	0	0	0	0	0	0	3	0	0	0	0	0	0	0	0	0	2	0	0	0	0	0	0	0	0	0	0	0	0	0	0	0	0	0	0	0	0
OTU_2415	Arthropoda	Insecta	Hemiptera	Aphididae	Hyalopteroides		100	Published	TTTATCTAATAACATTGCACATAATAATATTTCAGTTGATTTAACTATCTTTTCATTACATTTAGCAGGAATTTCATCAATTCTAGGAGCAATTAACTTTATCTGCACAATCTTAAATATAATACCAAATAATATAAAATTAAATCAAATCCCTCTTTTCCCTTGATCAATTTTAATTACAGCTATTTTATTAATTTTATCTTTA	0	0	0	0	0	0	0	0	0	4	0	0	0	0	0	0	0	0	0	0	0	0	0	0	0	0	0	0	4	0	0	0	0	0	0	0	0	0
OTU_2446	Arthropoda	Insecta	Lepidoptera				85.39	Published	TCTAAGTGGAATTATTTCTCATTCTGGACCTGGAGTAGATTTAGCTATTTTTAGTTTACACCTATCTGGAGCCGCTTCAATTTTAGGAGCTATTAATTTTATTACTACTATTATAAATATGCGTGCGCCTGGATTATATATGTTTCGTTTACCTTTATTCGTTTGAGCTGTGTTTATTACTGCATTTTTATTATTATTATCTTTA	9	0	0	0	0	0	0	0	0	0	0	0	0	0	0	0	0	0	0	0	0	0	0	0	0	0	0	0	0	0	0	0	0	0	0	0	0	0
OTU_2455	Arthropoda	Insecta	Coleoptera				87.25	Private	TTTATCTAGTATTACGGCGCATTCTGGTGGTTCTGTAGATTTAGCTATTTTTAGTTTACATTTATCTGGTGTTTCTTCTATTGCAGGTGCAATTAATTTTATGACTACAATAATAAATATGCGTGTTAAAGGTATGACTTTATACCGTTTACCTTTATTTATTTGAGCTTTATTTTTAACTGCATTTTTATTAGTATTAACTTTA	0	0	0	0	0	0	0	0	2	0	0	0	0	0	0	0	0	0	0	0	0	0	0	0	0	0	0	0	0	0	0	0	0	0	0	0	0	0
OTU_2491	Arthropoda	Insecta	Lepidoptera				88.37	Private	TTTAAGTTCTCTTCAATCGCATTCATCAGCTGCTGTAGATTTAGCTATCTTTAGTTTACATTTAGCTGGTATTTCTTCAATATTAGGAGCTATTAATTTTATAACTACTATATTTAATATGAGAGCACCTGGTATGGGGATGCATCAAATTCCACTTTTCGTTTGATCTGTTTTAATAACTGCTTTTTTATTATTATTATCTTTA	0	0	0	0	0	0	0	0	0	0	0	0	0	0	0	0	0	0	0	5	1	2	0	0	0	0	1	1	1	0	0	0	0	0	0	0	0	0
OTU_2517	Arthropoda	Insecta	Diptera	Drosophilidae	Scaptomyza		100	Private	TTTATCTTCAGGAATTGCCCATGGAGGAGCTTCTGTTGATTTAGCAATTTTTTCTTTACATTTAGCTGGTATTTCTTCAATTTTAGGGGCCGTAAATTTTATTACAACAGTAATTAATATGCGATCTTCTGGAATTACATTAGACCGAATACCTTTATTTGTATGATCTGTTGTAATTACAGCTTTATTATTATTATTATCACTA	0	0	0	0	0	0	0	0	0	0	0	0	0	0	0	0	0	0	0	0	0	0	0	0	2	0	0	0	0	0	0	0	0	0	0	0	0	0
OTU_2530	Arthropoda	Insecta	Lepidoptera				85.39	Private	ATTATCTGGAATACAATCACATAGTGGACCTGCAGTAGATATGGCTATTTTAAGTCTACATATGGCAGGAGTTTCTTCAATTTTAGGAGCTGTTAATTTTATTACAACAATTATAAATATGAGACCTAAAGGCTTAAAAATGCATATGCTTCCTCTTTTTGTTTGGTCTGTATTAATTACAGCAATTTTATTATTATTATCTCTT	4	0	0	0	0	0	0	0	0	0	0	0	0	0	0	0	0	0	0	0	0	0	0	0	0	0	0	0	0	0	0	0	0	0	0	0	0	0
OTU_2539	Arthropoda	Insecta	Lepidoptera				85.39	Published	TTTAAGTAGTTTACCCGCTCATTCAGGCCCGGCTGTTGATTTAGTTATTTTTAGTTTACATTTAGCTGGAATTAGTTCTATCTTAGGTGCAATTAATTTTATTACAACTTTGTATAATATGCGAGCACGTGGTTTGTATGAACATCGTGTTTCTTTGTTTTGTTGAACTATCTTTGTTACTGCGATTTTACTTTTGTTATCATTA	0	0	0	1	0	0	0	0	0	0	0	0	0	0	0	0	0	0	1	0	0	0	0	0	0	0	0	0	0	0	0	0	0	0	0	0	0	0
OTU_2562	Arthropoda	Insecta	Odonata				85.29	Private	ATTATCTGGAAATATTGCCCATTCTGGTCCAGCTGTTGATTTAGCAATTTTTAGTTTACATTTAGCTGGAGTTTCTTCTTTATTAGGAGCTATTAATTTTATTGTTACAATTTTAAACATGCGTGCACGTGGATTAACTATGTATATGATTCCACTTTTTACATGAGGTGTTTTTATTGCTGCAATTTTATTATTATTATCATTA	5	5	0	0	1	4	1	0	0	0	0	0	0	0	0	0	0	0	0	4	0	3	0	0	0	0	0	0	0	0	0	0	0	0	0	0	0	0
OTU_2619	Arthropoda	Insecta	Diptera	Chironomidae	Tanytarsus		97.98	Early-Release	TTATCTTCAAGAATTGCTCACAGAGGTGCTTCTGTAGATTTAGCTATTTTTTCTCTTCATTTAGCAGGTATTTCTTCTATTTTAGGATCAGTGAATTTTATTACAACTGCTATTAATATGCGGGCTAATGGAATTACATTAGATCGAATACCTCTGTTGTCTGATCAGTAGTAATTACAACTGTTATTACTTTTATCACTG	0	0	0	0	0	0	0	0	0	0	0	0	0	6	0	0	0	0	0	0	0	0	0	0	0	0	0	0	0	0	0	0	0	0	0	0	0	0
OTU_2690	Arthropoda	Insecta	Hymenoptera				86.27	Private	TTTATCAGGTATACAAAGTCACAGTGGACCTAGTGTAGATTTAGCTATTTTTGCGTTACACTTATCTGGTATAAGTTCTCTTTTAGGAGCTATGAATTTCATTACAACAATATTAAATATGAGAGCGCCAGGAATAAGATTACATAAATTAGCTTTATTTGGTTGAGCAGTAGTAGTAACAGCAGTGTTATTATTATTATCTTTA	0	0	0	0	0	0	0	0	0	6	0	2	0	0	0	0	0	0	0	0	0	0	0	0	0	0	0	0	0	0	0	0	0	0	0	0	0	0
OTU_2711	Arthropoda	Insecta	Lepidoptera				85.32	Private	GTTAAGTAGTGTAGCTAGTCACTCTGGAGGTGCTGTCGATTTAGCTATTTTTAGTCTTCATCTTTCGGGTATAAGTAGTCTTTTAGGTGCTATTAACTTTATAACAACAGTATTTAATATGCGAGGCCCAGGTATGACTATGCATCGACTACCTCTTTTCGTTTGGTCTGTTCTTATTACTGCTTTTTTACTGTTATTATCTTTA	0	0	0	0	0	0	0	1	1	0	0	0	0	0	1	0	0	0	0	0	1	0	0	0	0	0	0	0	0	0	0	0	0	0	0	0	0	0
OTU_2729	Arthropoda	Insecta	Diptera	Ceratopogonidae			91.04	Private	TCTTTCTGCTAATATTGCTCATGCAGGAGCATCTGTTGACTTAGCCATTTTTTCTTTACATTTAGCTGGAATCTCTTCCATTTTAGGAGCAGTTAATTTTATTACCACAATTATTAATATACGATCTAATGGTATTACATTTGATCGAATACCACTATTTGTATGATCAGTGTTAATTACAGCAATTTTATTACTATTATCTCTG	0	0	0	0	0	0	0	0	0	0	0	0	0	0	0	0	0	0	0	0	3	0	0	0	0	0	0	0	0	0	0	0	0	0	0	0	0	0
OTU_2732	Arthropoda	Insecta	Lepidoptera				86.52	Published	TTTAAGTAGTATTCTTTCACATTCAGGTCCTTCAGTAGATTTAGCAATTTTTAGTTTGCATTTAGCAGGTATTGCTTCTATCTTAGGAGCTATTAATTTTATTACTACTGTTGTTAATATGAGAGCGCCTGGATTATCTATGCATAGACTTCCTTTATATGTTTGGACATTATTTGTTACTTCTTTTTTATTATTACTTTCTTTA	0	0	0	2	0	0	1	0	0	0	1	1	2	0	0	2	0	0	0	0	0	4	0	0	0	0	0	0	0	0	0	0	0	0	0	0	0	0
OTU_2744	Arthropoda	Insecta	Lepidoptera				86.52	Published	GCTATCTGGAAATGAAGCACATTCTGGCGCTGCAGTTGATTTAGCTATTTTTAGTTTACATTTGGCTGGTATTTCTTCAATAGCTGGAGCAATTAATTTTATTACAACTATTGTTAATATGCAGTTTCGTGGTGGTGCGCTTTATAGAATGCCTTTATTTTGTTGAGCTGTTTTAATAACGGCAGTTTTGCTTTTACTTTCTTTA	14	0	0	0	0	0	0	0	0	0	0	0	0	2	0	0	0	0	0	0	0	0	0	0	0	0	0	0	0	0	0	0	0	0	0	0	0	0
OTU_2764	Arthropoda	Insecta	Lepidoptera				86.52	Private	ATTATCTTCAATTCAAGCTCACTCTGGAGGTAGTGTTGATTTAGCAATCTTTGCTTTACATTTAGCTGGGATCTCATCATTGTTAGGAGCAATAAATTTTATTGTTACTATATTTAATATGAGAACACCAGGTATGACAATGCATCAAATGCCTTTATTTGTTTGAGCAGTATTTATAACGGCTTTTTTATTATTATTATCTTTA	0	0	0	3	0	0	0	0	0	0	0	0	0	0	0	0	0	0	0	0	0	0	0	0	0	0	0	0	0	0	0	0	0	0	0	0	0	0
OTU_2822	Arthropoda	Insecta	Coleoptera				85.31	Private	TCTTTCTAGTATTACAGCCCATTCTGGTGGTTCAGTGGATTTAGCAATATTTAGTTTACATTTATCAGGTGTTTCTTCTATTGCAGGTGCTATTAATTTCATGACTACAATAATTAATATGCGTGTAAAAGGGATGACTTTATACCGTTTACCTTTATTTATCTGAGCTATGTTTTTAACAGCATTCCTATTAGTTATGACTTTA	0	0	6	0	0	0	0	0	0	0	1	0	0	0	0	0	0	2	0	0	0	0	0	0	0	0	0	0	0	0	0	0	0	0	0	0	0	0
OTU_2824	Arthropoda	Insecta	Lepidoptera				85.11	Private	ATTAAGTAGTGTACCTGCACATTCTGGGCCTGCTGTAGATTTGGCTATTTTTTCATTACATCTGGCAGGTATTTCTTCAATTTTAGGTGCTTTAAATTTTATCACAACTATTTGAAATATGCGTGCTCGTGGTTTAACTATGCACAGATTAGCTTTATTTCCTTGATCAGTTTTTGTTACTGCTTTTTTATTATTATTATCTTTA	0	0	0	0	0	0	0	0	0	0	2	0	0	0	0	0	0	0	0	1	0	0	0	0	3	0	0	0	0	0	0	0	0	0	0	0	0	0
OTU_2859	Arthropoda	Insecta	Diptera	Cecidomyiidae			100	Private	TCTATCTTCTATTATTGCCCATAATGGAGCATCAGTTGATCTATCAATTTTTTCCCTTCATATAGCCGGAATTTCATCTATTCTAGGAGCAATTAACTTTATTACAACAATAATCAATATACGAATTAAAACCATAAAATTTGATCAAATTACCCTTTTTACATGATCCGTTATTATTACTGCTATTCTACTTCTTCTTTCATTA	0	0	0	0	0	0	1	0	0	0	0	0	0	0	0	0	0	0	0	0	0	0	0	0	0	0	0	0	0	0	0	0	0	0	0	0	0	0
OTU_2893	Arthropoda	Insecta	Lepidoptera				87.95	Private	ATTGTCTAGTGTTCAATACCATTCTGGTGCTTCTGTAGATTTGGCTATTTTTAGTTTACATTTAGCTGGGGCTTCTTCAATTTTAGGGGCTATTAATTTTATTTCCACTGTTTTTAATATGTACAGTAATGGAATGTTCATGCATAAGTTAGTATTATTTGTGTGAGCTGTATTAATTACTGCATTTTTATTATTATTATCATTG	8	7	4	0	0	0	0	0	0	0	0	0	0	0	0	0	0	0	0	0	0	0	0	0	0	0	0	0	0	0	0	0	0	0	0	0	0	0
OTU_2913	Arthropoda	Insecta	Lepidoptera				85.54	Published	ATTAAGTAGCAATATTGCTCATTCTGGGCCTTCTGTAGATTTAGCTATTTTTAGCTTACATTTAGCTGGGATTTCTTCTATTCTAGGAGCAATTAATTTTTTAACAACTTTCATTAATATGAGAATACCAGGGTTATATTTACATAAAATTCCATTATTTTGTTGGTCTATAGCCGTTACAGCTTTTTTACTACTTTTAACATTA	0	0	0	0	0	0	0	0	0	0	0	0	0	0	0	0	5	0	0	0	0	0	0	0	0	0	0	0	0	0	0	0	0	0	0	0	0	0
OTU_2934	Arthropoda	Insecta	Lepidoptera				85.53	Private	ATTAGCTGGTATCCAATCACATTCTGGTGGTTCTATTGATATTGCTATTTTTGCTTTACATTTAGCTGGTATTAGTTCTATGTTAGGAGCTATTAATATTATAACAACAGTAGTTAATATGAAAGCTTTTGGATTAAGTTGGCATAAAATACCATTATATGTATGGTCTGTATTTGTTACTTCTTTTTTATTAATATTTGCTTTA	2	0	0	0	0	0	0	0	0	0	0	0	0	0	0	0	0	0	0	0	0	0	0	0	0	0	0	0	0	0	0	0	0	0	0	0	0	0
OTU_2972	Arthropoda	Insecta	Diptera	Cecidomyiidae			100	Private	TTTATCTTCTATTATTGCTCATACAGGATCCTCAGTAGATTTTTCAATTTTCTCTTTACATATTGCAGGAATTTCATCAATTTTAGGAGCTATTAAttttatttcaacaatattaaatataaaaattaaatttttaaattttgatcaaatttctttatttACTTGATCTGTATTAATTACAGCTGTATTATTATTATTATCATTA	0	0	0	0	0	0	0	0	0	0	0	0	0	0	0	0	0	0	0	0	0	0	0	0	0	1	0	0	0	0	0	0	0	0	0	0	0	0
OTU_3021	Arthropoda	Insecta	Lepidoptera				88.76	Private	ATTATCTAGTATTGTAGCACATTCTGGTGGTTCTGTAGATTTAGCTATTTTTAGCTTACATTTAGCTGGGATTTCCTCATTATTAGGTGCAATTAATTTTATTACTACTGTATTTAATATGAGAGCAAATGATATGAGTATTTATCAAATACCATTATTTTGTTGAGCAATATTTATAACTGCTTTTTTATTATTATTATCTTTA	0	15	0	0	0	0	0	0	0	0	0	0	0	0	0	0	0	0	0	0	0	0	0	0	0	0	0	0	0	0	0	0	0	0	0	0	0	0
OTU_3095	Arthropoda	Insecta	Lepidoptera				85.39	Published	TTTAGCGGGTATTTTAGGTCACCCATCTAGTTCTGTTGACTTTGCCATATTTAGTTTACATTTAGCGGGTATATCTTCGATTTTAGGTGCTATAAACTTTATCACTACTATTTTTAATATGAAAGCAAGAGGTATGCATTTATATCAAATGCCCTTATTTGTATGATCTGTTTTAATTACAGCTTTTTTATTATTACTTTCTTTA	0	0	0	0	0	0	0	0	0	0	0	0	0	0	2	0	0	0	0	0	0	0	0	0	0	0	0	0	0	0	0	0	0	0	0	0	0	0
OTU_3131	Arthropoda	Insecta	Diptera	Chironomidae	Cladotanytarsus		96.08	Published	TTTATCATCCAATATTGCACACAGTGGAGCTTCTGTAGATTTAGCTATCTTTTCCCTACACCTAGCAGGAATTTCCTCAATCTTAGGATCAGTAAATTTTATTACTACAGCTATTAATATACGAAGAAATGGAATTACTTTGGATCGAATACCATTATTTGTTTGATCTGTAATTATTACTACTATTTTACTTTTATTATCTTTA	0	0	7	0	0	0	0	0	0	0	0	0	0	0	0	0	0	0	0	0	0	0	0	0	0	0	0	0	0	0	0	0	0	0	0	0	0	0
OTU_3135	Arthropoda	Insecta	Lepidoptera				85.39	Private	ATTATCTAGTATTGAATATCATTCAGGTGCTAGTGTAGATTTAGCAATTTTTAGTTTACATTTAGCGGGGATATCTTCAATATTAGGAGCAATGAATTTTATAACAACAATATTAAATATGAGAGCACCAGGTATGACAATGCATAAATTGCCATTATTTGTATGATCTGTATTTTTAACAGCAATTTTATTAATATTATCTTTA	0	0	0	0	0	0	0	0	0	0	0	0	0	0	0	0	0	0	0	0	0	0	0	0	0	0	0	0	1	1	0	0	0	0	0	0	0	0
OTU_3171	Arthropoda	Insecta	Lepidoptera				86.52	Published	ATTATCAAGTGTACAAGCACATTCTGGAGGTTCTGTAGATATTGCTATTTTTAGTTTACATTTAGCTGGAGTTTCTTCTTTATTAGGTGCTATTAATTTTATAACAACTATTATTAATATGAGAAGTCCTGGTATGTCTTTACATACAATACCTTTATTTGTTTGGTCAGTATTAATAACTGCTGTATTACTATTATTATCATTA	4	0	0	0	0	0	0	0	0	0	0	0	0	0	0	0	0	0	0	0	0	0	0	0	0	0	0	0	0	0	0	0	0	0	0	0	0	0
OTU_3196	Arthropoda	Insecta	Trichoptera	Psychomyiidae	Psychomyia		97.04	Private	TTTATCTAACAATATATTTCATTCAGGAAAAGCTATTGATATTTCAATTTTTTCTTTACATCTTGCTGGTATTTCATCAATTTTAGGAGCAATTAACTTTATTACTACTATTATTAATATAAAACTTAAAAGAATTACATTTGACATTATTCCTCTCTTTGTATGATCAATTGGAATTACAGCCTTATTACTTTTATTATCATTA	0	2	0	0	0	0	1	2	0	0	0	0	2	0	0	0	0	0	0	0	0	0	0	0	0	0	0	0	0	0	0	0	0	0	0	0	0	0
OTU_3203	Arthropoda	Insecta	Lepidoptera				85.39	Private	ATTATCAAGCATTGAAGCACATTCTGGTGGGTCTGTTGATTTAGCTATTTTTAGTTTACATTTAGCAGGTATTTCTTCGTTATTAGGTTCAATCAATTTTATTACAACAATTGTAAATATGAGATCCCCTGGATTACATATGCAACGTTTACCTTTATTTGCTTGGGCGATGTTTATTACAGCATTTTTATTATTATTATCGTTA	0	0	0	0	0	1	0	0	0	0	0	0	0	0	0	0	2	0	0	0	0	0	0	0	0	0	0	0	0	0	0	0	0	0	0	0	0	0
OTU_3239	Arthropoda	Insecta	Lepidoptera				85.39	Published	TTTAAGCTCAGTTCAAGCACATTCAGGTCCATCTGTAGATCTTGCTATTTTTAGTTTACATTTAGCAGGAGTTTCTTCAATTTTAGCTTCTATTAATTTTATTACAACTATTTTTAATATGCGTGTTCCTGGATTATCTATGCATCGTATCCCTCTTTTTGTATGGGCAATTTTAATTACTTCTTTTTTGCTACTTTTATCTTTA	0	4	0	0	0	0	0	0	0	0	0	0	0	0	0	0	0	0	0	4	0	0	0	0	0	0	0	0	0	0	0	0	0	0	0	0	0	0
OTU_3280	Arthropoda	Insecta	Lepidoptera				85.39	Published	TATTGCATCTATAGAATATCACTCAGGAGGTTCTGTTGACTTAGCAATATTTAGTTTACATTTAGCTGGTATATCTTCTATATTAGGAGCTATGAATTTTATTACTACGATTCTTAATATGAGAACTCCTGGTATGACTATGCATAGATTACCTCTATTTGTTTGAGCTGTTTTTATTACAGCAATATTATTAATATTATCTTTA	0	0	0	0	0	0	0	0	0	0	0	0	0	0	0	0	0	0	0	4	0	0	0	0	0	0	0	0	0	0	0	0	0	0	0	0	0	0
OTU_3369	Arthropoda	Insecta	Lepidoptera				85.39	Private	GTTAAGTGATGTTATAGCACATTCTGGTGCTTCTGTGGATTTAGCCATTTTTAGCCTTCATTTGGCTGGTGTTTCATCTATTTTAGGTGCTTTAAATTTTATTACAACAATTTATAATATGAGATCATCAAAATTGATTTTGCATAAAATGCCATTGTTTGTTTGATCAGTTTTTTTAACTGCTTTTTTATTATTATTATCGTTA	0	0	0	0	0	0	0	0	0	1	0	0	0	0	0	0	0	0	0	0	0	0	0	0	0	0	0	0	0	0	0	0	0	0	0	0	0	0
OTU_3377	Arthropoda	Insecta	Lepidoptera				86.52	Published	TTTAGCAGGTGTTTTAGGTCATCCATCGAGTTCTGTAGATTTCGCTATATTTAGCTTACATTTAGCTGGTATATCTTCAATTTTAGGTGCGATAAATTTTATTACTACTATTTTTAATATGAAAGCTAGAGGTATGCATTTATATCAAATGCCTTTATTCGTATGATCAGTTTTAATTACAGCTTTTTTATTATTACTTTCTTTA	0	0	0	0	1	0	0	1	0	0	0	0	0	0	0	0	0	0	0	0	0	0	0	0	0	0	0	0	0	1	0	0	0	0	0	0	0	0
OTU_3444	Arthropoda	Insecta	Hymenoptera				86.36	Private	TTTAAGTTCGATTCTAGCTCATTCTGGTTGTGCTGTGGATTTAGCTATTTTTAGTTTACATATAGCAGGTGTTTCATCTATTGCAGGAGCTATTAATTTTATTGTAACTATTGTTAATATGCGATGTCCTGGATTATATTTTCGTCGATTACCGTTGTTTGTTTGATCCGTTTTTATAACTGCTTTTTTATTATTATTATCTTTA	0	0	0	0	3	0	0	0	0	0	0	0	3	0	0	0	0	0	0	0	0	0	0	0	0	0	0	0	0	0	0	0	0	0	0	0	0	0
OTU_3522	Arthropoda	Insecta	Lepidoptera				85.39	Private	ATTAGCAAACAGTATATTCCATAGAGGGGTATCTGTAGATTTAGCAATTTTCAGAGTTCATTTAGCAGGAACCTCATCAATTTTAGGAGCAATTAATTTTATTACCACAATTATTAATATAAACACTACCCAATCATCTGAACAAACCCCACTGCTAGTTTGATCAGTAATAGTAACTGCAATTTTATTATTACTATCATTA	79	0	0	0	0	0	0	0	0	0	0	21	0	0	0	0	0	0	4	76	0	0	0	0	0	0	0	0	0	0	1	0	2	0	0	0	0	1
OTU_3701	Arthropoda	Insecta	Lepidoptera				85.93	Published	TTTAAGTAGTATTGTAGCACATTCTGGACCTTCTGTAGATTTAGCTATTTTTAGTTTACATATTGCAGGAATTTCTTCATTATTAGGTGCTATTAATTTTATAACTACTATTTATAATATGAGAATAAATGGTTTAACATTTCATAAATTACCTTTATTTGTATGATCTGTTTTAATTACAGCTATATTATTATTATTATCATTA	0	0	0	0	0	0	0	0	0	3	0	0	0	0	0	0	0	1	0	0	0	0	0	0	0	0	0	1	0	0	0	0	0	0	0	0	0	0
OTU_3712	Arthropoda	Insecta	Lepidoptera				85.39	Published	ACTAAGTTCCATTCAAGCTCACTCAGGTCCTTCAGTGGATTTAGCTATTTTTAGTTTACATTTAAGCGGTGCTTCATCAATTCTAGGAGCAATTAACTTTATTACTACTATTATAAACATACGCGCACCAGGAATAGGAATACACCGTTTACCTTTGTTCGTCTGGTCAGTTTTTATTACTGCTTTTTTACTTTTACTATCATTA	0	0	2	1	2	0	0	0	0	0	0	0	0	0	0	0	0	0	0	0	0	0	0	0	0	0	0	0	0	0	0	0	0	0	0	0	0	0
OTU_3768	Arthropoda	Insecta	Lepidoptera				87.64	Published	ATTAGCTTCTCTTCAATCACACTCATCAGCTGCTGTAGATTTAGCAATTTTTAGTTTACATTTAGCAGGAATTTCATCTATATTAGGAGCTGTTAATTTTATAACTACTATATTTAATATGAGAGCTCCAGGTATGGGTATGCATCAAGTTCCACTTTTTGTATGATCTGTTTTAATTACAGCTTTTTTATTATTACTATCTTTA	0	0	0	0	0	0	0	0	0	0	0	0	0	0	0	0	0	0	0	0	0	0	0	0	0	0	0	0	1	0	0	0	0	0	0	0	0	0
OTU_3805	Arthropoda	Insecta	Lepidoptera				85.39	Published	ATTATCTGGTATAATTGCACATTCTGGAGGATCTGTTGATTTAGCAATATTTAGTTTGCATTTAGCAGGTATTTCATCTTTATTAGGTGCTATTAATTTTATAACTACTGTATTTAATATGCGTATTTCTGGATTATCTTTATATGAAATACCTTTATTTTGTTGAGCTATATTAATTACTGCATTTTTATTATTATTATCTTTA	0	0	8	3	0	0	0	0	0	0	0	0	0	0	0	0	0	0	0	0	0	0	0	0	0	0	0	0	0	0	0	0	0	0	0	0	0	0
OTU_3870	Arthropoda	Insecta	Diptera	Chironomidae	Bryophaenocladius		100	Private	CCTATCTTCTGGAATTGCCCATGCTGGGGGGTCTGTTGATTTAGCTATTTTTTCTTTACACCTAGCTGGTATTTCTTCAATTTTAGGGGCGGTTAATTTTATTTCCACAGTTATTAATATGCGATCCGAAGGAATTTCATTAGACCGAATACCTTTATTTGTTTGATCAGTTGTAATTACAGCAATCTTACTTTTACTATCTCTA	0	5	0	0	0	0	1	0	0	0	0	0	0	0	0	0	0	0	0	0	0	0	0	0	0	0	0	0	0	0	0	0	0	0	0	0	0	0
OTU_3892	Arthropoda	Insecta	Lepidoptera				88.76	Private	ATTAGCAAGTATAGAAAGTCATTCAGGTGGTTCTGTAGATTTAGCAATTTTTAGTTTACATTTAGCTGGTGCTTCTTCAATTTTAGGTGCTATTAATTTTATTACAACTATAATAAATATGAGAGCTCCAAATTTAAAAATGCATTGAATACCGTTATTTGTTTGAGCTATATTTATAACTGCATTTTTATTATTATTATCATTA	0	0	0	0	0	0	0	0	1	0	1	0	0	0	0	0	0	0	0	0	0	0	0	0	0	0	0	0	0	0	0	0	0	0	0	0	0	0
OTU_3947	Arthropoda	Insecta	Lepidoptera				87.64	Published	GGTATCAAGTTTACAATCCCACTCAGGGGCTTCTGTAGACTTAGCTATATTTAGTTTACATTTAGCCGGAGTTTCTTCTATTTTAGGGGCAATTAATTTTATTGTAACTATTTTAAATATGAGATGCCCAGGAATGTTTATGCATAAAATTCCATTATATGTTTGAGCAGTTTTTATTACAGCATTTTTATTATTATTTTCTTTA	0	8	0	7	0	0	0	0	0	0	0	0	0	0	3	0	0	0	0	10	0	0	0	0	0	0	0	0	0	0	0	0	0	0	0	0	0	0
OTU_4192	Arthropoda	Insecta	Odonata				89.71	Private	ACTTTCTGGAAATATTGCACACTCGGGACCTGCTGTTGATTTAGCAATTTTTAGTTTACATATTTCTGGTGCTTCTTCTATTTTAGGATCAATTAATTTTATTATTACAATTACAAATATGCGTGCACGTGGTATGACAATGTATATGTTACCTTTATTTGCATGATCAGTTTTAATTACTGCTTTTTTATTAGTTTTATCTTTA	0	0	0	2	0	0	0	0	0	0	0	0	0	0	0	0	0	0	0	0	0	0	0	0	0	0	0	0	0	0	0	0	0	0	0	0	0	0
OTU_4221	Arthropoda	Insecta	Coleoptera	Hydrophilidae	Anacaena		97.77	Private	TTTAAGTGGCATTGAAGCACATCCGGGAACTTCTGTAGATATTGCTATTTTTAGCTTGCATTTAGCAGGTGCTTCTTCGATTGCAGGTGCCATAAATTTTATGACAACTATTTTTAATCTTAGAGTTAAAGGGTATCGTATGTTTAGATTACCACTATTTGTTTGAGCTACACTAGTTACCGCCTTTTTATTAGTATTTACTTTA	0	0	0	0	0	0	0	0	0	0	0	0	0	0	1	0	0	0	0	0	0	0	0	0	0	0	0	0	0	0	0	0	0	0	0	0	0	0
OTU_4275	Arthropoda	Insecta	Lepidoptera				86.25	Published	TTTGAGTAGTTTACTTGGTCATGCAGGTCCTGCTGTTGACTACAGTATTTTTAGTTTACATTTAGCGGGAGCTTCATCAATTTTAGGTGCAATTAATTTTATTGTAACCATTATTAATATGCGGGGTTTAGGTATTGCGTTTTATACAGCTCCGTTATTTACTTGATCTGTTTTTATTACCGCTATTTTATTATTATTATCGTTG	0	0	0	0	0	0	0	0	0	0	0	0	3	0	0	0	0	0	0	0	0	0	0	0	0	0	0	0	0	0	0	0	0	0	0	0	0	0
OTU_4289	Arthropoda	Insecta	Coleoptera				87.18	Private	GTTATCAGGTATAATTTCTCATTCTGGTGGGTCTGTTGATTTAGCAATTTTTAGTTTACATTTAGCTGGTGTTTCATCAATTGCTGGATCTATAAATTTTATGACTACGATTATTAATATGCGTATAAAAGGTTTAACAATGTATCGTATACCTTTATTTATATGATCTGTTTTTATTACTGCTTTTTTATTAGTTTTTACATTA	0	0	0	0	0	0	0	0	0	0	2	0	0	0	0	0	0	0	0	0	0	0	0	0	0	0	0	0	0	0	0	0	0	0	0	0	0	0
OTU_4354	Arthropoda	Insecta	Coleoptera	Carabidae	Syntomus		97.55	Published	TTTATTTTCAGGGATTGCTCATGCTGGTGCTTCTGTTGATTTAGCTATTTTTAGCTTACATTTAGCAGGGGTATCATCAATTTTAGGTGCAGTAAATTTCATTACAACAATTATTAATATACGATCTGTAGGAATTACATTTGATCGAATACCTTTATTTGTTTGATCTGTAGGAATTACTGCATTATTATTATTACTATCTTTA	0	0	0	0	0	0	0	0	0	0	1	0	0	0	0	0	0	0	0	0	0	0	0	0	0	0	0	0	0	0	0	0	0	0	0	0	0	0
OTU_4361	Arthropoda	Insecta	Coleoptera				87.18	Private	GTTATCTGGTATTATAGCACATTCTGGAGGTTCAGTTGATTTAGCTATTTTTAGTTTACATTTAGCTGGTGTTTCATCAATAGCTGGTTCAATTAATTTTATGACAAGTATTATAAATATGCGTATAAAAGGAATGAATATGTATAGAATTCCTTTATTCATTTGAGCTTCTTTTATTACAGCTTTTTTATTAGTTTTTACATTA	0	0	0	0	0	0	0	0	0	0	1	0	0	0	0	0	3	0	0	0	0	0	1	0	0	0	0	0	0	0	0	0	0	0	0	0	0	0
OTU_4405	Arthropoda	Insecta	Lepidoptera				86.24	Private	TTTAAGTAGTATAGCTAGCCATTCTGGTGGTTCTGTAGATTTAGCTATATTTAGTCTTCATCTATCTGGTGTTAGTAGTCTTTTAGGGGCTATTAATTTTATAACAACTATATTCAATATGCGTGGTCCAGGTATGACAATGCATAGACTTCCTTTATTTGTATGGGCTGTTCTAATAACAGCATTTTTACTATTATTATCTTTA	5	0	5	0	0	0	0	0	0	0	0	0	0	0	0	0	0	0	0	0	0	0	0	0	0	0	0	0	0	0	0	0	0	0	0	0	0	0
OTU_4546	Arthropoda	Insecta	Lepidoptera				85.39	Published	TTTATCTAGCATTCAAGCACATTCTGGTGCTTCAGTTGATTTAGCAATTTTTAGTTTACATTTAGCAGGTATCTCTTCTATTTTAGGTGCTGTTAATTTTATTACAACAATTTTAAACATGAGACCTGAAAAAATGAGTATGCATTTACTACCTTTATTTGTTTGGGCAGTTTTAATTACAGCAATATTATTATTATTATCGTTA	22	5	8	13	0	0	2	0	1	1	3	0	0	2	0	1	1	0	0	0	0	0	0	0	0	0	0	0	0	0	0	0	0	0	0	0	0	0
OTU_4586	Arthropoda	Insecta	Odonata	Calopterygidae			90.2	Private	ATTATCTGGAAATATTGCGCATTCTGGTCCAGCTGTTGATTTAGCAATTTTTAGTTTACATATTTCTGGAGCTTCTTCAATTTTAGGATCAATCAATTTTATTATAACTATTACTAATATGCGTGCTCGTGGTATGACTATGTATATGTTACCTTTATTTGCTTGATCAGTTTTAATTACTGCTTTTTTACTTGTTTTATCATTA	0	2	0	0	0	0	0	0	0	0	0	0	0	0	0	0	0	0	0	0	1	0	0	0	0	0	0	0	0	0	0	0	0	0	0	0	0	0
OTU_4622	Arthropoda	Insecta	Lepidoptera				85.39	Published	TTTAAGTGCCATTAAACAACATGAAGGTCCATCTGTGGACTTAGCAATTTTTAGTTTACATTTATCAGGCGCAGCTTCTATTTTAGGTGCAATTAATTTTATTACTACTGTTATTAATATGCGCTTACCTGGTATGACAATGTATCGCTTACCTTTATATGTTTGAGCTTTATTTATTACTTCTTTTTTACTTTTAATTTCTCTT	0	0	0	0	0	0	0	0	0	0	0	0	1	0	0	0	0	0	0	0	2	0	0	0	0	0	0	0	0	0	0	0	0	0	0	0	0	1
OTU_4633	Arthropoda	Insecta	Lepidoptera				87.64	Private	TTTATCTGGTATATTAGGCCATCCTTCTAGTTCTGTAGATTTTGCTATATTCAGTTTACATTTAGCGGGTATATCCTCAATATTAGGTGCTATTAATTTTATTACAACTATTTTTAATATGAAAGCTAGAGGTATGCATATGTATCAAATGCCATTATTTGTTTGATCTGTTTTAATTACAGCATTTCTTTTATTATTATCATTA	0	0	0	0	1	1	0	0	0	1	1	0	0	1	0	0	0	0	0	0	0	0	0	0	0	0	0	0	0	0	0	0	0	0	0	0	0	0
OTU_4706	Arthropoda	Insecta	Lepidoptera				86.52	Private	ATTAAGTAGTTTAAAGGGTCATCCAGGACCTGCTGTTGATCTTGCAATATTTAGTTTACATTTAGCAGGTATTTCATCTATTTTAGGTGCTATTAATTTTATATCTACAATAATAAATATGAGAGCTATTGGTTTAATTTATATGAAATTACCATTATTTGTATGATCTGTATTAATTACAGCAGTGTTATTATTATTATCATTA	0	2	0	0	0	0	1	0	0	0	0	0	0	0	0	0	0	0	0	0	0	0	0	0	0	0	0	0	0	0	0	0	0	0	0	0	0	0
OTU_4726	Arthropoda	Insecta	Lepidoptera				85.39	Published	TTAGCTTCAATTGAAGCCCATGCAGGAGCTTCTGTTGACTTAGCTATTTTTAGTTTACATTTAGCTGGTTTATCTTCTTTATTAGGAGCTATAAATTTTATAGCCACTATTTTTAATATGAGATCTCCAGGAATGACTTTTTTTCGTATGCCTTTATTTGTATGGTCTGTATTAATTACAGCTTTTTTACTTTTATTATCATTA	0	0	0	0	0	0	0	0	0	0	1	0	0	0	0	0	0	0	0	0	0	0	0	0	0	0	0	0	0	0	0	0	0	0	0	0	0	0
OTU_4811	Arthropoda	Insecta	Lepidoptera				88.76	Private	TTTAGCAAGTATAGAAAGTCATTCTGGTGGTTCTGTAGATTTAGCAATTTTTAGTTTACATTTAGCGGGTGCTTCTTCAATTTTAGGTGCTATTAATTTTATTACAACTATAATAAATATGAGAGCTCCAAGTTTAAAAATGCATTGAATACCATTATTTGTTTGAGCTATATTTATAACAGCATTTTTATTATTATTATCTTTA	5	0	0	2	0	0	0	0	0	0	0	0	0	0	0	0	0	0	0	0	0	0	0	0	0	0	0	0	0	0	0	0	0	0	0	0	0	0
OTU_4934	Arthropoda	Insecta	Hemiptera	Aphididae	Coloradoa		100	Published	TTTATCAAATAATATTGCACACAATAATATTTCAGTTGATTTAACTATTTTTTCACTACATTTAGCAGGAATTTCATCAATTTTAGGAGCAATTAATTTTATTTGTACTATTATAAACATAATACCTAATAACATAAAATTAAATCAAATCCCACTTTTCCCTTGATCAATTTTAATTACAGCTATTTTATTAATCTTATCTTTA	0	0	0	0	0	0	0	0	0	0	0	0	0	0	0	0	0	0	0	0	0	0	0	0	0	0	0	0	0	0	0	0	0	0	0	0	2	0
OTU_4997	Arthropoda	Insecta	Lepidoptera				85	Private	GCTTTCTTCTTATAGTTATCACTCAACTGTTGGTGTTGATTTAGCTATTTTTAGTTTACATATTGCCGGTATTTCATCATTATTAGGTGCTATTAATTTTATAACAACTATTATTAATATGCGTATTTCAAATTTATATTTTCATCGGTTACCATTATTTTGTTGGTCTATACTTATTACTGCATTTTTATTACTTTTGTCATTG	0	0	0	0	0	0	0	0	0	0	0	2	0	0	0	0	2	0	0	0	0	0	0	0	0	0	0	0	0	0	0	0	0	0	0	0	0	0
OTU_5014	Arthropoda	Insecta	Lepidoptera				87.64	Private	TTTGGCTGGTATTCAAGCTCATTCAGGAGGATCTGTTGATTTAGCTATTTTTAGTTTACATTTAGCAGGTGCTTCTTCGATTATGGGAGCAATTAATTTTATTACAACTATTTTTAATATGCGTGTACCAGGAATGGGAATGCATAGAATTCCATTATTTGTGTGAGCAATTCTAATAACTGCATTTTTATTATTATTGTCTTTA	0	0	0	0	0	0	0	0	0	0	0	0	0	0	0	0	0	1	0	0	0	0	0	0	0	0	0	0	0	0	0	0	0	0	0	0	0	0
OTU_4324	Arthropoda	Malacostraca	Isopoda	Armadillidiidae	Armadillidium	Armadillidium vulgare	100	Private	GCTGGCGTCTAGAATTGCTCATAGAGGAGCATCTGTAGATTTAGGTATTTTTTCTCTCCACCTTGCTGGAGCTTCTTCTATTTTAGGGGCTGTGAATTTTATTACTACTATAATTAATATACGAGCAGCTGGAATTAGAATAGACCGTGTTCCTTTATTTGTTTGATCAGTATTAGTAACGGCTGTACTTTTACTTTTATCCCTA	0	2	0	0	0	0	0	0	0	0	0	0	0	0	0	0	0	0	0	0	0	0	0	0	0	0	0	0	0	0	0	0	0	0	0	0	0	0
OTU_2246	Arthropoda	Malacostraca	Decapoda	Varunidae	Eriocheir	Eriocheir sinensis	100	Private	TTTAGCAGCAGCCATCGCTCATGCTGGGGCATCAGTTGATCTTGGTATCTTTTCTCTACATCTTGCCGGAGTTTCCTCAATTTTAGGAGCTGTTAATTTCATAACAACAGTTATTAATATACGATCATATGGTATAACAATGGATCAAATACCTCTTTTTGTTTGAGCTGTATTTATTACTGCTATTTTGCTTCTTTTGTCTCTT	0	0	0	0	0	0	0	0	0	0	0	0	0	0	0	0	2	0	0	0	0	0	0	0	0	0	0	0	0	0	0	0	0	0	0	0	0	0
OTU_54	Arthropoda	Malacostraca	Amphipoda	Gammaridae	Gammarus	Gammarus fossarum	99.47	Published	TTAGCCGGCAACTCCGCACATAGCGGAAGCGCTGTAGATTTAGCTATTTTCTCTTTACACCTAGCCGGGGCTTCTTCCACTTTAGGTGCCATCAACTTTATTTCCACCGTCCTAAATATACGCAGACCCGGTATATCCATAGACCAAGCGCCTCTCTTTGTCTGGTCTATTTTTATTACCACTATCCTACTTCTGCTATCTCTA	0	0	227	0	0	1	0	0	12	0	0	22	0	0	1	0	28	0	0	0	0	0	0	0	0	0	0	0	0	0	0	0	0	0	0	0	0	0
OTU_875	Arthropoda	Malacostraca	Amphipoda	Gammaridae	Gammarus	Gammarus fossarum	99.49	Published	CTTAGCCGGCAACTCCGCACATAGCGGAAGCGCTGTAGATTTAGCTATTTTCTCTTTACACCTAGCGGGGGCTTCTTCCATTTTAGGTGCCATCAACTTTATTTCCACCGTCCTAAATATACGCAGACCCGGCATATCCATAGACCAGGCGCCTCTCTTTGTCTGGTCTATTTTTATTACCACTATCCTACTTCTATTACCTCTG	0	0	0	0	9	0	0	0	0	0	0	0	0	0	103	0	0	0	0	0	0	0	0	0	0	0	0	0	0	0	0	0	0	0	0	0	0	0
OTU_22	Arthropoda	Malacostraca	Amphipoda	Gammaridae	Gammarus	Gammarus pulex	99.02	Private	GTTGGCAGGTATCTCAGCTCATGGGGGTGGAGCGGTAGATCTAGCCATTTTTTCACTCCATTTAGCAGGGGCCTCCTCTATCCTAGGCGCTATTAATTTTATCTCTACTGTAATCAATTTACGTAGACCTGGTATATCTATAGACCAAACGCCTCTTTTTGTTTGGTCTGTCTTTATCACAGCTATCTTACTCCTATTATCCTTA	0	0	195	0	0	0	0	0	0	0	19	0	0	0	0	0	0	0	0	0	0	0	0	1	0	0	0	0	0	0	0	0	0	0	0	0	0	0
OTU_2523	Arthropoda	Malacostraca	Mysida	Mysidae	Limnomysis	Limnomysis benedeni	100	Private	TTTATCGGGGGGAATTGCTCATGTGGGAGGGGCGGTAGATATAGGGATTTTTTCACTTCATCTTGCAGGGGCTTCCTCTATTTTGGGAGCTGTAAATTTTATTTCAACTGTAATTAATATACGAGCTCCAGGAATAACTATAGATAGAATACCATTATTTGTGTGATCTGTGTTTATTACTGCTATTTTATTACTCTTATCTTTA	0	0	11	0	0	0	0	0	0	2	0	0	0	0	0	0	0	0	0	0	0	0	0	0	0	0	0	0	0	0	0	0	0	0	0	0	0	0
OTU_3478	Arthropoda	Malacostraca	Amphipoda	Gammaridae			93.03	Private	GCTATCGAGCGCAACCGCACATTCTGGAGGTTCTGTAGATTTAGCTATTTTCTCTTTACACCTAGCGGGGGCTTCTTCCATTTTAGGTGCCATCAACTTTATTTCCACCGTCCTAAATATACGCAGACCCGGTATATCCATAGACCAAGCGCCTCTCTTTGTCTGGTCTATTTTTATTACCACTATCCTACTTCTATTATCTCTG	0	0	4	0	0	0	0	0	0	0	0	0	0	0	1	0	0	0	0	0	0	0	0	0	0	0	0	0	0	0	0	0	0	0	0	0	0	0
OTU_138	Rotifera	Monogononta	Ploima	Brachionidae	Brachionus	Brachionus budapestinensis	98.44	Published	TTTATCTGATTCTAAGTACCATAGAGGAATTTCTGTTGATTTAGCTATTTTCAGACTTCATTTAGCTGGTATCTCTTCTATTCTAGGTAGAATTAACTTTCTTACTACTATTTTATGCTCTCGTACTACTAAGACGTTTTCATTAGATCGTTTACCTCTTATGCTTTGAGCTCTTGCTGTTACGGCTGTCCTTTTAATCACTAGTTTA	0	0	0	0	6	0	19	8	7	25	0	29	40	66	9	1	41	23	2	0	0	0	0	36	0	35	21	30	44	0	45	193	26	16	8	73	85	21
OTU_76	Rotifera	Monogononta	Ploima	Brachionidae	Brachionus	Brachionus calyciflorus	98.04	Published	TTTATCTGACTCAAGATATCACAGAGGTATTTCAGTAGACTTAGCTATTTTTAGACTTCATTTATCTGGTATTTCTTCTATTTTAGGTAGAATCAACTTTCTAACTACAATTATTTGTTCTCGTACAACAAAGAGAATTTCTTTAGATCGTTTACCTTTATTCCTATGAGCTGTTGCTGTAACAGCAATTTTACTAATTACTAGACTT	0	0	0	0	0	0	151	60	8	3	0	0	0	0	0	5	0	17	0	0	0	0	0	0	0	593	94	0	0	0	0	0	287	0	0	0	152	0
OTU_108	Rotifera	Monogononta	Ploima	Brachionidae	Brachionus	Brachionus calyciflorus	98.51	Published	TCTATCTGATTCCAGATACCATAGAGGTATTTCAGTAGATTTAGCTATTTTTAGGCTTCATTTATCTGGTATTTCTTCTATTTTAGGTAGAATTAATTTTTTAACTACAATTATCTGTTCTCGTACAACAAAGAGAATTTCTTTAGATCGTTTGCCTTTATTCTTATGAGCTGTTGCTGTAACAGCAATTTTATTAATTACTAGGCTT	0	0	0	100	11	0	15	0	35	29	9	0	0	0	0	46	0	1	0	0	0	0	42	39	0	80	0	143	73	69	0	0	0	81	226	0	9	0
OTU_146	Rotifera	Monogononta	Ploima	Brachionidae	Brachionus	Brachionus quadridentatus	99.02	Published	TTTATCTGATTCTGTTTATCATAGAGGTGTTTCTGTTGATTTGGCTATTTTTAGTCTGCATTTATCCGGTGTCTCTTCTATTTTAGGTAGAATTAATTTCTTAACTACTATTATCTGTTCTCGTACTACTAAAAGTATTTCTTTAGATCGCTTGCCTCTTATGCTTTGAGCTATCGCTGTTACTGCTATTCTTTTGATTACTAGCCTT	0	0	0	16	0	0	10	121	3	0	38	104	0	0	0	70	74	69	0	0	0	0	4	0	0	7	73	1	0	29	60	27	0	0	53	49	27	0
OTU_612	Rotifera	Monogononta	Ploima	Brachionidae	Brachionus	Brachionus quadridentatus	98.53	Published	TTTATCTGACTCAACTTACCATAGAGGAGTTTCAGTAGACTTAGCTATTTTTAGACTTCATTTATCTGGTGTTTCTTCTATTTTAGGTAGAATTAATTTCTTAACTACTATCATCTGCTCTCGTACTACGAAAAGAATTTCTTTAGATCGTCTACCATTGATGTTGTGGGCTATCGCTGTCACTGCGATCCTACTTATTACTAGGTTG	0	12	72	3	5	3	4	35	1	0	4	1	0	0	11	2	0	0	4	0	0	0	0	0	0	0	15	0	0	0	0	0	0	0	0	0	0	0
OTU_229	Rotifera	Monogononta	Ploima	Euchlanidae	Euchlanis	Euchlanis dilatata	99.49	Published	CCTCTCAGATTCTAAATATCACTCTGGCATTTCAGTAGATTTAGCTATTTTTAGTCTTCATCTAGCTGGTATTTCATCTATCTTAGGTAGTATCAATTTTTTGACTACTATTATCTGTTCTCGTACAGCAAAAGCTATTTCACTCGATCGTATGCCTCTTATGTTGTGAGCATTTGCTGTTACCTCTGTCCTTCTTGTTACTAGTCTT	0	15	53	7	3	0	2	1	23	5	2	2	68	5	115	0	0	2	0	18	0	0	2	0	0	0	0	41	0	0	0	0	2	184	0	0	0	0
OTU_740	Rotifera	Monogononta	Ploima	Euchlanidae	Euchlanis	Euchlanis dilatata	98.04	Published	CCTCTCTGATTCTAAATATCACTCTGGCATTTCAGTAGATCTAGCTATTTTTAGTCTTCATTTAGCTGGTATTTCATCTATCTTAGGTAGTATCAATTTTTTGACTACTATTATTTGTTCTCGTACAGCAAAAGCTATTTCACTCGATCGTATGCCTCTTATGTTGTGGGCATTTGCTGTTACTTCTGTGCTTCTTGTTACTAGTCTT	0	4	0	7	0	0	0	0	0	2	0	76	0	1	0	0	0	0	0	0	0	0	0	0	0	0	0	0	0	0	163	0	0	0	0	0	0	0
OTU_26	Rotifera	Monogononta	Ploima	Brachionidae	Keratella	Keratella cochlearis	100	Published	TTTGTCAGATTCTAAGTATCATTCAGGTATTTCCGTTGATTTAGCTATTTTTAGTCTTCATCTGGCTGGTATCTCTTCTATTTTGGGTAGGATTAACTTTCTTACTACTATCGTTTGCTGCCGTACAACAAAGGCTATTTCTTTGGATCGTATGCCTCTCATGCTGTGGGCTCTTTCTGTTACGGCTGTCTTGCTTATTACAAGGCTT	0	731	0	601	1374	2040	1924	2044	1845	1796	2196	2426	1365	1692	1518	2323	844	2712	919	0	172	0	59	230	263	157	249	206	222	234	157	205	202	220	298	108	406	157
OTU_132	Rotifera	Monogononta	Ploima	Brachionidae	Keratella	Keratella cochlearis	98.53	Published	ACTATCTGATTCTAAGTACCATTCTGGTATTTCTGTTGATTTGGCTATTTTTAGTCTTCACTTAGCTGGTATCTCTTCTATTTTAGGTAGAATTAACTTTCTTACTACTATCGTTTGCTCTCGCACTACTAAGAGTATTTCATTAGATCGTATGCCTCTTATGCTTTGAGCTCTTTCCGTAACTGCTATTTTACTCATTACTAGTTTG	0	0	0	0	0	38	0	19	15	0	45	20	436	379	151	9	15	0	0	0	0	0	0	0	10	0	7	8	0	6	9	106	0	43	6	3	0	0
OTU_820	Rotifera	Monogononta	Ploima	Brachionidae	Keratella	Keratella cochlearis	98.41	Published	TCTCTCCGACTCTAAGTATCATTCTGGTATTTCAGTTGACTTAGCTATTTTCAGTCTTCATTTAGCAGGAATTTCTTCCATTCTTGGTAGGATTAATTTTCTTACTACTATCGTTTGCTCTCGCACAACTAAGGTTATTTCTCTTGATCCTCCTCTAATGCTTTGGGCTATCTCTGTTACTGCTATTCTTTTGATTACTAGGTTG	0	94	93	71	10	619	159	479	922	166	954	158	539	629	168	182	43	271	128	0	36	13	1	0	36	7	28	77	17	79	18	83	29	12	21	4	31	13
OTU_1115	Rotifera	Monogononta	Ploima	Brachionidae	Keratella	Keratella cochlearis	98.5	Published	TTTGTCAGATTCTAAGTATCATTCAGGTATTTCCGTTGATTTAGCTATTTTTAGTCTTCATCTGGCTGGTATCTCTTCTATTTTGGGTAGGATTAACTTTCTTACTACTATCGTTTGTTGCCGTACAACAAAAGCTATTTGGATCGTATGCCTCTCATGCTGTGGGCTCTTTCTGTTACGGCTATCTTGCTTATTACAAGGCTT	0	0	0	0	87	69	123	117	129	33	15	63	18	92	66	99	0	285	23	0	0	0	0	18	7	21	22	17	0	3	0	2	24	4	31	0	47	1
OTU_1591	Rotifera	Monogononta	Ploima	Brachionidae	Keratella	Keratella cochlearis	98.51	Published	ACTATCCGATTCTAAGTACCATTCTGGTATCTCTGTTGATTTGGCTATTTTTAGTCTTCACTTGGCTGGTATTTCTTCTATTTTAGGTAGAATTAACTTTCTTACAACTATTGTTTGCTCTCGCACTACTAAGAGTATTTCATTAGATCGTATGCCCCTTATGCTTTGAGCTCTTTCCGTAACTGCTATTTTACTCATTACTAGTTTG	0	0	0	0	0	0	0	0	96	0	0	28	0	0	0	0	0	0	0	0	0	0	0	0	0	0	0	29	0	0	0	0	0	0	0	0	0	0
OTU_2614	Rotifera	Monogononta	Ploima	Brachionidae	Keratella	Keratella cochlearis	100	Published	GCTATCGAGCGCAACCGCACATTCTGGTATTTCAGTTGACTTAGCTATTTTCAGTCTTCATTTAGCAGGAATTTCTTCCATTCTTGGTAGGATTAATTTTCTTACTACTATCGTTTGCTCTCGCACAACTAAGGTTATTTCTCTTGATCGTATGCCTCTAATGCTTTGGGCTATCTCTGTTACTGCTATTCTTTTGATTACTAGGTTG	0	2	2	0	0	2	1	1	2	4	3	1	3	7	1	2	1	2	0	0	2	0	1	0	0	0	0	1	0	0	0	0	0	0	1	0	1	1
OTU_4099	Rotifera	Monogononta	Ploima	Brachionidae	Keratella	Keratella cochlearis	98.87	Published	ACTATCAAGTGCAACAGCTCACTCTGGTATTTCAGTTGACTTAGCTATTTTCAGTCTTCATTTAGCAGGAATTTCTTCCATTCTTGGTAGGATTAATTTTCTTACTACTATCGTTTGCTCTCGCACAACTAAGGTTATCTCTCTTGATCGTATGCCTCTAATGCTTTGGGCTATTTCTGTTACTGCTGTTCTTTTAATTACTAGGTTG	0	0	0	1	0	0	2	2	0	2	0	0	2	6	0	0	0	2	0	0	0	0	0	0	0	0	0	0	2	0	0	0	0	0	0	0	2	0
OTU_4	Rotifera	Monogononta	Ploima	Synchaetidae	Polyarthra	Polyarthra dolichoptera	99	Published	TCTAGCAGATGCTAAATATCATTCAGGTATTTCTGTTGATTTGGCGATTTTTAGTCTTCATTTAGCTGGAGTTTCTTCTATTTTAGGAAGAATTAATTTTTTAACTACTATTATTTGTTCTCGTACTACAAAATTGATTTCTATAGATCGTTTACCTTTGTTATTATGAGCAATTTCAGTTACAGCTGTATTGTTAATTACAAGATTA	21081	10987	4685	29390	47467	16729	4779	24604	20086	17353	20815	22276	17871	19293	13690	30230	27538	8290	20386	18865	18067	5923	36223	42493	23312	7527	28175	23764	21152	21866	21891	26879	15881	12781	30658	25397	11622	21815
OTU_318	Rotifera	Monogononta	Ploima	Synchaetidae	Polyarthra	Polyarthra dolichoptera	98.89	Published	TCTGGCAGATGCTAAATATCATTCAGGTATTTCTGTTGATTTGGCGATTTTTAGTCTTCATTTAGCTGGAGTTTCTTCTATTTTAGGAAGAATTAATTTTTTAACTACTATTATTTGTTCTCGTACTACAAAATTGATTTCTATGGATCGTTTACCTTTGTTATTATGAGCAATTTCAGTTACAGCTGTTAATTACAAGATTA	79	72	167	581	526	205	58	264	477	235	157	345	269	227	212	303	372	109	285	81	90	179	796	603	307	88	368	544	329	215	343	307	164	248	260	376	126	291
OTU_430	Rotifera	Monogononta	Ploima	Synchaetidae	Polyarthra	Polyarthra dolichoptera	98.46	Published	TCTGGCAGATGCTAAATATCATTCAGGTATTTCTGTTGATTTGGCGATTTTTAGTCTTCATCTAGCTGGAGTTTCTTCTATTTTAGGAAGAAATTTTTTAACTACTATTATTTGTTCTCGTACTACAAAATTGATTTCTATGGATCGTTTACCTTTATTATTATGAGCAATTTCAGTTACAGCTGTATTGTTAATTACAAGATTA	127	2	0	29	17	15	25	22	67	5	95	26	82	39	0	49	36	11	37	168	0	0	57	26	18	49	39	107	6	96	34	134	6	16	67	34	25	58
OTU_667	Rotifera	Monogononta	Ploima	Synchaetidae	Polyarthra	Polyarthra dolichoptera	99.46	Published	TCTGGCAGATGCTATCACTCAGGTATTTCTGTTGATTTGGCGATTTTTAGTCTTCATTTAGCTGGAGTTTCTTCTATTTTAGGAAGAATTAATTTTTTAACTACTATTATTTGTTCTCGTACTACAAAATTGATTTCTATGGATCGTTTACCTTTGTTATTATGAGCAATTTCAGTTACAGCTGTATTGTTAATTACAAGATTA	61	37	90	441	304	127	36	179	302	156	129	201	181	144	130	156	238	78	200	44	52	118	399	287	171	48	170	296	162	105	230	146	105	134	139	213	58	153
OTU_679	Rotifera	Monogononta	Ploima	Synchaetidae	Polyarthra	Polyarthra dolichoptera	98.47	Published	TCTGGCAGATGCTAAATATCATTCAGGTATTTCTGTTGATTTGGCGATTTTTAGTCTTCTTAGCTGGAGTTTCTTCTATTTTAGCTGGAATTAATTTTTTAACTACTATTATTTGTTCTCGTACTACAAAATTGATTTCTATGGATCGTTTACCTTTGTTATTATGAGCAATTTCAGTTACAGCTGTATTGTTAATTACAAGATTA	9	5	8	48	32	23	9	25	46	17	21	27	34	25	15	39	47	10	26	11	7	16	69	48	19	7	34	69	17	26	33	36	17	19	42	45	10	32
OTU_765	Rotifera	Monogononta	Ploima	Synchaetidae	Polyarthra	Polyarthra dolichoptera	98.97	Published	TCTGGCAGATGCTAAATATCATTCAGGTATTTCTGTTGATTTGGCGATTTTTAGTCTTCATTTAGCTTTTTTCTTCTTTTAGGAAGAATTAATTTTTTAACTACTATTATTTGTTCTCGTACTACAAAATTGATTTCTATGGATCGTTTACCTTTGTTATTATGAGCAATTTCAGTTACAGCTGTATTGTTAATTACAAGATTA	0	0	0	3	2	0	0	0	0	0	0	3	0	0	0	1	2	0	0	0	0	11	25	1	3	0	8	6	13	6	5	11	0	3	12	4	2	5
OTU_1413	Rotifera	Monogononta	Ploima	Synchaetidae	Polyarthra	Polyarthra dolichoptera	98.96	Published	TCTCAACAGAAATACCTAAATATCATTCAGGTATTTCTGTTGATTTGGCGATTTTTAGTCTTCATTTAGCTGGAGTTTCTTCTATTTTAGGAAGAATTAATTTTTTAACTACTATTATTTGTTCTCGTACTACAAAATTGATTTCTATGGATCGTTTACCTTTGTTATTATGAGCAATTTCAGTTACAGCTGTATTGTTAATTACAAGATTA	5	9	10	35	24	15	2	19	24	14	15	22	36	10	10	16	18	6	13	7	10	9	58	43	17	7	33	43	27	11	32	19	15	24	13	20	6	22
OTU_2983	Rotifera	Monogononta	Ploima	Synchaetidae	Polyarthra	Polyarthra dolichoptera	98.97	Published	TCTGGCAGATGCTAAATATCATTCAGGTATTCTGTTGATTTGGCGATTTTTAGTCTTCGTTTAGCTGGAGTTTCTTCTATTTTAGGAAATTAATTTTTTAACTACTATTATTTGTTCTCGTACTACAAAATTGATTTCTATGGATCGTTCACCTTTGTTATTATGAGCAATTTCAGTTACAGCTGTATTGTTAATTACAAGATTA	0	0	0	4	1	1	0	2	0	0	0	1	1	1	0	1	1	2	5	0	0	0	4	6	1	0	2	3	3	3	5	1	2	2	4	4	0	1
OTU_2988	Rotifera	Monogononta	Ploima	Synchaetidae	Polyarthra	Polyarthra dolichoptera	100	Published	TCTGGCAGATGCTAAATATCATTCAGGTATTTCTGTTGATTTGGCGATTTTTAGTCTTCATTTAGCTGGAGTTTTTAGGAAGAATTAATTTTTTAACTACTATTATTTGTTCTCGTACTACAAAATTGATTTCTATGGATCGTTTACCTTTGTTATTATGAGCAATTTCAGTTACAGCTGTATTGTTAATTACAAGATTA	0	0	0	0	0	0	0	0	0	0	0	0	0	0	0	0	0	0	0	0	2	0	28	17	12	0	8	12	7	2	7	14	3	7	5	8	2	7
OTU_3326	Rotifera	Monogononta	Ploima	Synchaetidae	Polyarthra	Polyarthra dolichoptera	100	Published	ATTATCTAGTATAGAATATCATTCAGGTATTTCTGTTGATTTGGCGATTTTTAGTCTTCATTTAGCTGGAGTTTCTTCTATTTTAGGAAGAATTAATTTTTTAACTACTATTATTTGTTCTCGTACTACAAAATTGATTTCTATAGATCGTTTACCTTTGTTATTATGAGCAATTTCAGTTACAGCTGTATTGTTAATTACAAGATTA	4	0	7	0	2	0	0	0	0	0	0	0	0	0	0	0	0	2	0	2	0	0	0	0	2	1	1	1	3	0	0	1	0	2	1	0	0	0
OTU_4302	Rotifera	Monogononta	Ploima	Synchaetidae	Polyarthra	Polyarthra dolichoptera	98.92	Published	GCTATCGAGCGCAACCGCACATTCAGGTATTTCTGTTGATTTGGCGATTTTTAGTCTTCATCTAGCTGGAGTTTCTTCTATTTTAGGAAGAATTAATTTTTTAACTACTATTATTTGTTCTCGTACTACAAAATTGATTTCTATGGATCGTTTACCTTTATTATTATGAGCAATTTCAGTTACAGCTGTATTGTTAATTACAAGATTA	1	0	0	3	0	0	0	0	1	0	0	0	0	3	0	1	1	1	1	1	0	2	1	0	0	0	1	1	2	1	1	1	1	1	2	0	1	0
OTU_4960	Rotifera	Monogononta	Ploima	Synchaetidae	Polyarthra	Polyarthra dolichoptera	98.89	Published	TCTGGCAGATGCTAAATAAAATATCATTCAGGTATTTCTGTTGATTTGGCGATTTTTAGTCTTCATTTAGCTGGAGTTTCTTCTATTTTAGGAAGAATTAATTTTTTAACTACTATTATTTGTTCTCGTACTACAAAATTGATTTCTATAGATCGTTTACCTTTGTTATTATGAGCAATTTCAGTTACAGCTGTATTGTTAACTACAAGATTA	25	12	14	61	59	27	5	40	39	37	23	38	22	37	19	39	33	19	24	26	21	10	54	50	35	8	42	41	28	19	31	27	17	21	29	26	16	26
OTU_5	Rotifera	Monogononta	Ploima	Synchaetidae	Polyarthra	Polyarthra vulgaris	99.5	Published	TCTTTCTGACTCTAAGTACCATTCAGGTATTTCAGTAGATTTAGCTATTTTTAGTCTTCATCTTGCTGGAGTTTCATCTATTCTCGGTAGAATTAATTTTCTTTCAACAATTATTTGCTCTCGAACAACTAAGATAATCTCTCTTGACCGTTTACCTTTATTCCTGTGATCTGTATCTATCACTGCTATTCTATTAATCACAAGATTA	9871	2332	736	2792	3010	3807	13439	2832	1430	2022	3070	2248	11415	11471	18197	10030	17364	14650	15634	21096	5349	1411	3314	3198	6362	12489	6315	4405	3108	6193	2084	12800	37187	24625	21579	28487	32778	29712
OTU_729	Rotifera	Monogononta	Ploima	Synchaetidae	Polyarthra	Polyarthra vulgaris	98.96	Published	CCTATCTGACTCTAAGTTCCATTCTGGAATTTCTGTAGATCTTGCCATTTTTAGTCTACATCTTGCTGGTATTTCTTCTATTCTTGGTAGAATCAATTTTCTTTCTACAATTATTTGTTCTCGAACAACCAAGCTTGTTTCCCTAGACCGTCTTCCTCTGATGCTTTGGGCTATAGCTGTCACAGCAGTTCTGCTGGTTACTAGACTA	0	0	0	0	0	0	26	0	0	0	0	10	0	0	0	8	0	0	0	0	0	0	0	0	0	0	0	0	0	0	0	0	0	0	3	0	0	0
OTU_2474	Rotifera	Monogononta	Ploima	Synchaetidae	Polyarthra	Polyarthra vulgaris	98.47	Published	TCTTTCTGACTCTAAGTACCATTCAGGTATTTCAGTAGATTTAGCTATTTTTAGTCTTCATCTTGCTGGAGTTTTCATCTATTCTGGGTAGAATTAATTTTCTTTCAACAATTATTTGCTCTCGAACAACTAAGATAATCTCTCTTGACCGTTTACCTTTATTCCTGTGATCTGTATCTATTCTATTCTATTAATCACAAGATTA	0	0	0	6	2	1	7	0	0	0	0	0	2	3	11	7	8	8	17	0	5	0	0	1	0	4	2	1	3	0	1	3	27	19	17	22	32	16
OTU_2720	Rotifera	Monogononta	Ploima	Synchaetidae	Polyarthra	Polyarthra vulgaris	98.39	Published	TCTTTCTGACTCTAAGTACCATTCAGGTATTTCAGTAGATTTAGCTATTTTTAGTCTTCATCTTGCTGGAGTTTCATCTATTCTCGGTAGAATTAATTTTCTTTCAACAATTGCCTCGAACAACTAAGATAATCTCTCTTGACCGTTTACCTTTATTCCTGTGATCTGTATCTATCACTGCTATTCTATTAATCACAAGATTG	0	0	0	0	0	0	0	0	0	0	0	0	0	0	0	0	0	0	0	0	0	0	0	0	0	1	0	0	0	0	0	0	0	0	0	0	0	0
OTU_2801	Rotifera	Monogononta	Ploima	Synchaetidae	Polyarthra	Polyarthra vulgaris	98.9	Published	TCTTTCTGACTCTAAGTACCATTCAGGTATTTCAGTAGACTTAGCTATTTTTAGTCTTCATCTTGCTGCTCTATTCTCGGTAGAATTAATTTTCTTTCAACAATTATTTGCTCTCGAACAACTAAGATAATCTCTCTTGACCGTTTACCTTTATTCCTGTGATCTGTATCTATCACTGCTATTCTATTAATCACAAGATTA	0	0	0	0	0	0	0	0	0	0	0	0	0	0	0	0	0	0	0	0	0	0	0	0	0	0	0	0	0	0	0	0	0	0	5	0	0	1
OTU_3492	Rotifera	Monogononta	Ploima	Synchaetidae	Polyarthra	Polyarthra vulgaris	98.43	Published	CTTCTGACTCTAAGTACCATTCAGGTATTTCAGTAGATTTAGCTATTTTTAGTCTTCATCTTGCTGGAGTTTCATCTATTCTCGGTAGAATTAATTTTCTTTCAACAATTATTTGCTCTCGAACAACTAAGATAATCTCTCTTGACCGTTTACCTTTATTCCTGTGATCTGTATCTATCACTGCTATTCTATTACTAACTACTTTG	0	0	0	0	0	0	0	0	1	0	0	0	0	0	0	0	0	0	0	0	0	0	0	0	0	1	0	0	0	0	0	0	0	0	0	0	0	0
OTU_3498	Rotifera	Monogononta	Ploima	Synchaetidae	Polyarthra	Polyarthra vulgaris	98.35	Published	TCTTTCTGACTCTAAGTACCATTCAGGTATTTCAGTAGACTTAGCTATTTTTAGTCTTCATCTCGCTGGAGTTTCATCTATTCTCGGTAGAATTAATTTTCTTTCAACAATTATTTGCTCTCGAGATAATCTCTCTTGACCGTTTACCTTTATTCCTGTGATCTGTATCTATCACTGCTATTCTATTAATCACAAGATTA	0	0	0	0	0	0	0	0	0	0	0	0	0	0	0	0	0	0	0	0	0	0	0	0	0	0	0	0	0	0	0	0	0	1	0	1	0	0
OTU_4103	Rotifera	Monogononta	Ploima	Synchaetidae	Polyarthra	Polyarthra vulgaris	99.46	Published	TCTTTCTGACTCTAAGTACCATTCAGGTATTTCAGTAGATTTAGCTATTTTTAGTCTTCATCTTGCTGGAGTTTCATCTATTCTCGGTAGAAATTTTCTTTCAACAATTTGCTCTCGAACAACTAAGATAATCTCTCTTGACCGTTTACCTTTATTCCTGTGATCTGTATCTATCACTGCTATTCTATTAATCACAAGATTG	0	0	0	0	0	0	0	0	0	0	0	0	0	0	0	0	0	0	0	0	0	0	0	0	0	0	0	0	0	0	0	0	4	1	0	3	5	0
OTU_4309	Rotifera	Monogononta	Ploima	Synchaetidae	Polyarthra	Polyarthra vulgaris	99.44	Published	TCTTTCTGACTCTAAGTACCATTCAGGTATTTCAGTAGATTTAGCTATTTTTAGTCTTCATCTTGCTGGAGTTTCATCTATTCTCGGTAGAATTAATTTTCTTTCAACAATTATTTGCTCCCGAACAACTAAGATAATCTCTCTTGACCGTTTACCTTTATTCCTGTGATCTGTATCTATCACTGCTATTATTGTTATCGTTA	0	0	0	0	0	0	0	0	0	0	0	0	0	0	0	0	0	0	0	0	0	0	0	0	0	0	0	0	0	0	0	0	1	0	0	0	0	0
OTU_4809	Rotifera	Monogononta	Ploima	Synchaetidae	Polyarthra	Polyarthra vulgaris	98.91	Published	TCTTTCTGACTCTAAGTACCATTCAGGTATTTCAGTAGACTTAGCTATTTTTAGTCTTCATCTTGCTGGAGTTTCATCTGGTAGAATTAATTTTCTTTCAACAATTATTTGCTCTCGAACAACTAAGATAATCTCTCTTGACCGTTTACCTTTATTCCTTTGATCTGTATCTATCACTGCTATTCTATTAATCACAAGATTA	0	0	0	0	0	0	0	6	0	3	2	62	25	50	73	31	0	50	63	0	0	0	0	0	0	1	18	0	4	13	96	0	210	105	39	0	210	196
OTU_4956	Rotifera	Monogononta	Ploima	Synchaetidae	Polyarthra	Polyarthra vulgaris	99.44	Published	TCTTTCTGACTCTAAGTACCATTCAGGTATTTCAGTAGATTTAGCTATTTTTAGTCTTCATCTTGCTGGAGTTTCATCTATTCTCGGTAGAATTAATTTTCTTTCAACAATTATTTGCTCTCGAACAACTAAGATAATCTCTCTTGACCGTTTACCTTTATTCCTGTGATCTGTATCTATCACTGCTAAATCACAAGATTA	0	0	0	0	0	0	0	0	0	0	0	0	0	0	0	0	0	0	0	0	0	0	0	0	0	0	0	0	0	0	0	0	2	0	0	0	0	0
OTU_5027	Rotifera	Monogononta	Ploima	Synchaetidae	Polyarthra	Polyarthra vulgaris	99.44	Published	CCTCTCTGACTCTAAGTACCATTCAGGTATTTCAGTAGATTTAGCTATTTTAGTCTTCATCTTGCTGGAGTTCCATCTATTCTCGGTAGAATTAATTTTCTTTCAACAATTATTTGCTCGAACAACTAAGATAATCTCCCTTGACCGTTTACCTTTATTCCTGTGATCTGTATCTATCACTGCTATTCTATTAATCACAAGATTA	0	0	0	0	2	0	7	3	0	0	0	0	1	0	3	2	8	2	7	0	3	0	2	0	1	0	5	3	0	3	2	0	12	7	11	10	7	5
OTU_9	Rotifera	Monogononta	Ploima	Synchaetidae	Synchaeta	Synchaeta oblonga	98.97	Published	ATTATCTGATTCTAAATTTCATTCTGGAATTTCTGTTGATCTTGCAATTTTTAGTCTTCATATTGCTGGTATTTCGTCTATTTTAGGGAGAATTAACTTTATGACTACTATTATTTGTTCTCGTACTACTAAAATAGTGAGAATAGATCGTCTTCCTTTAATAATTTGATCCTTAGGGGTAACAGCATTCCTTTTAGTAACAACTTTA	587	1363	1644	2701	1193	1725	4369	1865	2176	2425	2771	2218	1118	1206	1719	565	527	1442	764	1529	5287	4776	11851	5164	7865	20132	8105	10097	8981	9238	8808	2092	7459	5314	2433	2222	6440	3100
OTU_2300	Rotifera	Monogononta	Ploima	Synchaetidae	Synchaeta	Synchaeta oblonga	98.41	Published	ATTATCTGATTCTAAATTTCATTCTGGAATTTCTGTTGATCTTGCAATTTTTAGTCTTCATATTGCTGGTATTTCGTCTATTTTAGGGAGAATCAACTTTATGACTACTATTATTTGTTCTCGTACTACTAAAATAGTGAGAATAGATCGTCTTCCTTTAATAATTTGATCCTTAACAGCATTCCTTTTAGTAACAACTTTA	4	3	0	10	3	1	11	3	7	4	5	1	2	3	3	0	1	2	0	8	7	6	35	18	13	62	17	33	19	18	25	10	18	11	6	3	15	4
OTU_2478	Rotifera	Monogononta	Ploima	Synchaetidae	Synchaeta	Synchaeta oblonga	98.4	Published	ATTATCTGATTCTAAATTTCATTCTGGAATTTCTGTCTGCAATTTTTAGTCTTCATATTGCTGGTATTTCATCTATTTTAGGGAGAATTAACTTTATGACTACTATTATTTGTTCTCGTACTACTAAAATAGTGAGAATAGATCGTCTTCCTTTAATAATTTGATCCTTAGGGGTAACAGCATTCCTTTTAGTAACAACTTTA	0	3	0	0	2	1	7	2	4	1	9	1	4	2	3	1	1	3	1	0	23	24	23	12	19	52	8	13	12	15	13	2	19	15	3	3	13	8
OTU_3555	Rotifera	Monogononta	Ploima	Synchaetidae	Synchaeta	Synchaeta oblonga	99.4	Published	ATTATCTGATTCTAAATTTCTGTTGATCTTGCAATTTTTAGTCTTCATATTGCTGGTATTTCGTCTATTTTAGGGAGAATCAACTTTATGACTACTATTATTTGTTCTCGTACTACTAAAATAGTGAGAATAGATCGTCTTCCTTTAATAATTTGATCCTTAGGGGTAACAGCATTCCTTTTAGTAACAACTTTA	0	0	0	0	0	0	0	0	1	0	0	0	0	0	0	0	0	0	0	0	0	0	0	0	0	0	0	1	0	0	0	0	0	0	0	0	0	0
OTU_7	Rotifera	Monogononta	Ploima	Synchaetidae	Synchaeta	Synchaeta pectinata	98.97	Published	ATTATCTGATTCTAAATTTCATTCTGGTATTTCTGTTGATTTAGCTATTTTTAGTTTACACTTAGCTGGTATTTCTTCTATTTTAGGTAGTATTAATTTTATAACTACTATTATTTGTTCTCGTACAACAAAGATAATTAGTATAGATCGTTTACCACTAATGTTATGATCATTAGGTGTTACTGCCTTCTTATTACTAACTACTTTG	133	916	5073	625	2080	5150	8525	3548	3053	6105	6797	5709	4986	4410	3509	2869	2884	4268	4536	172	2292	9611	1100	4172	8265	13743	6313	6912	13932	10140	14939	10096	4578	7254	5334	5241	8294	7391
OTU_17	Rotifera	Monogononta	Ploima	Synchaetidae	Synchaeta	Synchaeta pectinata	98.46	Published	ATTATCTGATTCTAAATTTCATTCTGGTATTTCTGTCGATTTAGCTATTTTTAGCTTACATTTAGCTGGTATTTCTTCTATTTTAGGTAGTATTAATTTTATAACTACTATTATTTGTTCTCGTACAACAAAGATAATCAGTATAGATCGTTTACCATTAATGTTATGATCACTAGGTGTTACTGCCTTTTTATTACTAACTACTTTG	0	502	1007	293	74	1247	918	501	526	275	932	803	1364	1475	690	436	467	562	406	0	556	1433	242	170	1482	1273	631	727	385	1082	1529	2815	911	846	569	618	665	447
OTU_25	Rotifera	Monogononta	Ploima	Synchaetidae	Synchaeta	Synchaeta pectinata	98.97	Published	TTTATCTGATTCTAAATTTCATTCTGGTATTTCTGTTGATTTAGCTATTTTCAGTTTACATTTAGCTGGAATTTCTTCTATTTTAGGTAGTATTAATTTCATAACTACTATTATTTGTTCTCGTACTACAAAAATAATTAGTATAGATCGTTTACCTTTAATACTATGATCTTTAGGTGTTACTGCTTTCTTATTATTAACTACTTTA	0	271	990	229	83	519	541	552	322	249	217	473	257	221	252	69	63	333	542	0	705	2070	632	507	1282	1713	1392	820	753	363	2570	409	534	618	137	131	770	1039
OTU_29	Rotifera	Monogononta	Ploima	Synchaetidae	Synchaeta	Synchaeta pectinata	98.46	Published	ATTATCTGATTCTAAATTTCATTCTGGTATTTCTGTGGATTTAGCTATTTTTAGCTTACATTTAGCTGGTATTTCTTCTATTTTAGGTAGTATTAATTTTATAACTACTATTATTTGTTCCCGTACAACAAAGATAATTAGTATAGATCGTTTACCACTAATGTTATGATCATTAGGTGTTACTGCTTTTTTACTACTAACTACTTTG	0	0	0	0	39	1263	786	0	333	681	1405	0	0	323	275	324	113	0	202	0	0	18	1	76	2502	1629	1	745	1237	3106	0	1	1153	279	775	167	1	493
OTU_166	Rotifera	Monogononta	Ploima	Synchaetidae	Synchaeta	Synchaeta pectinata	99.47	Published	TCTGGCAGATGCTAAATTTCATTCTGGTATTTCTGTCGATTTAGCTATTTTTAGCTTACATTTAGCTGGTATTTCTTCTATTTTAGGTAGTATTAATTTTATAACTACTATTATTTGTTCTCGTACAACAAAGATAATTAGTATAGATCGTTTACCATTAATGTTATGATCATTAGGTGTTACTGCCTTTTTATTACTAACTACTTTG	0	5	47	10	42	41	36	45	31	22	39	51	48	42	58	65	58	41	52	0	23	108	9	21	75	46	91	92	29	67	46	59	73	80	84	84	59	94
OTU_596	Rotifera	Monogononta	Ploima	Synchaetidae	Synchaeta	Synchaeta pectinata	98.43	Published	ATTATCTGATTCTAAATTTCATTCTGGTATTTCTGTCGATTTAGCTATTTTTAGCTTACATTTAGCTGGTTTCTTCTATTTTAGGTAGTATTAATTTTATAACTACTATTATTTGTTCTCGTACAACAAAGATAATTAGTATAGATCGTTTACCATTAATGTTATGATCATTAGGTGTTACTTTTTTTATTACTAACTACTTTG	0	12	41	0	10	18	17	14	5	5	11	11	22	12	28	15	15	17	15	0	7	102	2	24	40	52	35	23	15	27	64	16	12	50	29	24	23	28
OTU_618	Rotifera	Monogononta	Ploima	Synchaetidae	Synchaeta	Synchaeta pectinata	98.43	Published	ATTATCTGATTCTAAATTTCATTCTGGTATGTCGATTTAGCTATTTTTAGCTTACATTTAGCTGGTATTTCTTCTATTTTAGGTAGTATTAATTTTATAACTACTATTATTTGTTCTCGTACAACAAAGATAATTAGTATAGATCGTTTACCACTAATGTTATGATCATTAGGTGTTACTGCCTTTTTATTACTAACTACTTTG	0	30	201	6	83	451	544	261	155	171	450	360	340	222	274	275	188	296	280	0	95	676	23	78	745	781	603	421	345	735	306	391	463	581	553	433	724	652
OTU_722	Rotifera	Monogononta	Ploima	Synchaetidae	Synchaeta	Synchaeta pectinata	98.96	Published	ATTATCTGATTCTAAATTTCATTCTGGTATTTCTGTCGATTTAGCTATTTTTAGCTTACATTTAGCTGGTATTTCTTCTATTTTAGGTAGTATTAATTTTATAACTACTATTATTTGTTCTCGTACAACAAAGATAATTAGTATAGATCGTTTACCATTAATGTTATGATCATTAGGTGTTACTGCCTTTTTATTACTACTACCTG	0	317	2997	143	511	945	1267	1332	432	435	1051	1118	1326	730	1660	911	1075	1146	1065	0	622	5799	158	1350	1302	2175	1963	953	826	1146	3408	730	1311	2907	1374	1508	1702	1606
OTU_1879	Rotifera	Monogononta	Ploima	Synchaetidae	Synchaeta	Synchaeta pectinata	98.44	Published	TCTTTCAGATTCTAAATTTCATTCTGGTATTTCTGTCGATTTAGCTATTTTTAGTCTACATTTAGCTGGTATTTCTTCTATTTTAGGTAGTATTAATTTTATAACTACTATTATTTGTTCTCGTACAACAAAGATAATTAGTATAGATCGTTTACCACTAATGTTATGATCACTAGGTGTTACTGCCTTTTTATTACTAACTACTTTG	0	0	0	0	0	0	4	0	0	0	1	2	2	2	3	0	1	1	103	0	0	0	0	0	3	9	0	6	0	5	4	13	6	1	3	0	10	137
OTU_1974	Rotifera	Monogononta	Ploima	Synchaetidae	Synchaeta	Synchaeta pectinata	98.96	Published	ATTATCTGATTCTAAATTTCATTCTGGTATTTCTTGATTTAGCTATTTTTAGTTACACTTAGCTGGTATTTCTTCTATTTTAGGTAGTATTAATTTTATAACTACTATTATTTGTTCTCGTACAACAAAGATAATTAGTATAGATCGTTTACCACTAATGTTATGATCATTAGGTGTTACTGCCTTTTTATTACTAACTTTG	0	0	0	0	0	0	0	0	0	2	0	0	0	0	0	0	0	0	0	0	1	3	0	1	8	8	6	2	5	2	14	3	2	9	1	7	2	6
OTU_2980	Rotifera	Monogononta	Ploima	Synchaetidae	Synchaeta	Synchaeta pectinata	98.91	Published	ATTATCTGATTCTAAATTTCATTCTGGTATTTCTGTCGATTTAGCTATTTTTAGCTTACATTTAGCTGGTATTTCTTCTATTTTAGGTAGTATTAATTTTATAACTACTATTATTTGTTCTCGTACAACAAAGATAATTAGTATAGATCGTTTACCATTAATGTTATGATCATTAGGTGTTACTGCCTTTTTATTGTTGTTATCATTG	0	0	0	1	0	1	1	0	1	3	4	0	1	0	1	1	7	0	1	0	1	0	0	0	1	3	0	0	0	2	0	2	0	0	1	0	1	0
OTU_3509	Rotifera	Monogononta	Ploima	Synchaetidae	Synchaeta	Synchaeta pectinata	98.52	Published	ATTATCTGATTCTAAATTTCATTCTGGTATTTCTGTTGATTTAGCTATTTTTAGTTTACACTTAGCTGGTATTTCTTCTATTTTAGGTAGTATTAATTTTATAACTACTATTATTTGTTCTCGTACAACAAAGATAATTAGTATAGATTGTTTATTATTAATGTTATGATTATTAGGTGTTATTGTCTTTTTATTACTAACTACTTTG	0	0	0	0	0	0	0	0	0	0	0	0	0	0	0	0	0	0	0	0	0	0	0	0	0	0	0	0	0	0	9	1	0	0	0	0	0	0
OTU_3532	Rotifera	Monogononta	Ploima	Synchaetidae	Synchaeta	Synchaeta pectinata	98.83	Published	ATTATCTGATTCTAAATTTCATTCTGGTATTTCTGTTGATTTAGCTATTTTTAGTTTACACTTAGCTGGTATTTCTTCTATTTTAGGTAGTATTAATTTTATAACTACTATTATTTGTTCTCGTACAACAAAGATAATTAGTATAGATCGTTTACCACTAATGTTATGATCATTAGGTGTTACTGCCTTCTTTTTACTGTTATTATCTTTG	0	0	0	0	0	0	0	0	0	0	0	0	0	0	0	0	0	0	0	0	0	0	0	0	0	0	0	0	0	0	0	0	0	0	0	0	1	0
OTU_4957	Rotifera	Monogononta	Ploima	Synchaetidae	Synchaeta	Synchaeta pectinata	98.95	Published	ATTATCTGATTCTAAATTTCATGGTTTCTGTTGATTTAGCTATTTTTAGTTTACACTTAGCTGGTATTTCTTCTATTTTAGGTAGTATTAATTTTATAACTACTATTATTTGTTCTCGTACAACAAAGATAATTAGTATAGATCGTTTACCACTAATGTTATGATCATTAGGTGTTACTGCCTTCTTATTACTAACTACTTTG	0	0	0	0	0	0	0	0	0	0	0	2	0	0	0	0	0	0	0	0	0	0	0	0	0	0	0	0	0	0	0	0	1	0	0	0	0	0
OTU_1209	Rotifera	Monogononta	Ploima	Synchaetidae	Synchaeta	Synchaeta stylata	98.34	Published	TCTTTCAGATTCTAAATTTCATTCAGGAATTTCAGTAGATTTAGCTATTTAGTTTACATTTAGCTGGGATTTCTTCTATTATAGGAAGAATTAACTTTATAACTACTATTATTTGTTCTCGTACAACAAAAATAATTAGTATAGATCGTCTCCCTTTAATAATTTGAGCTTTAGGTGTAACAGCTTTTTAGTTACTACATTA	0	0	0	0	36	9	137	43	93	61	79	115	38	153	73	89	1	64	126	0	0	0	0	110	22	420	134	175	114	96	976	86	441	1	179	1	126	298
OTU_608	Rotifera	Monogononta	Ploima	Synchaetidae	Synchaeta	Synchaeta tremula	98.97	Published	TTTATCTGATTCTAAATTTCATTCAGGTATTTCTGTAGATTTAGCTATTTTTAGTTTACATTTAGCTGGTATTTCTTCTATTTTAGGTAGAATTAATTTTATAACTACTATTATTTGTTCTCGTACTACTAAAATGGTAAGAATAGATCGATTACCTCTTATATTATGATCATTAGGGGTTACAGCATTTTTATTGTTAACTACTTTA	0	0	0	0	0	0	0	0	0	0	0	0	0	0	0	0	6	0	0	0	0	0	0	0	0	0	0	0	0	0	0	0	17	0	0	38	0	0
OTU_2476	Rotifera	Monogononta	Ploima	Synchaetidae	Synchaeta		98.4	Published	ATTATCTGATTCTAAATTTCATTCTGGAATTTCTGTTGATCTTGCAAGTCTTCATATTGCTGGTATTTCGTCTATTTTAGGGAGAATCAACTTTATGACTACTATTATTTGTTCTCGTACTACTAAAATAGTGAGAATAGATCGTCTTCCTTTAATAATTTGATCCTTAGGGGTAACAGCATTCCTTTTAGTAACAACTTTA	2	3	6	18	1	5	12	4	8	4	5	7	4	5	7	2	3	5	2	9	14	7	37	16	21	64	23	31	36	26	44	7	18	8	5	10	19	5
OTU_67	Rotifera	Monogononta	Ploima	Synchaetidae	Synchaeta		98.44	Published	TCTTTCAGATTCTAAATTTCACTCAGGTATTTCTGTTGATTTAGCTATTTTTAGCTTACATTTAGCTGGTATTTCTTCTATTTTAGGTAGTATTAATTTTATAACTACTATTATTTGTTCTCGTACAACTAAAATAATTAGTATAGATCGTTTACCTTTAATATTATGATCATTAGGTGTAACAGCTTTTCTTTTACTAACTACTTTA	36	273	868	102	408	369	741	626	116	677	1046	327	332	213	321	267	198	139	366	1	1172	1341	179	1172	757	1264	1020	256	1386	1375	1875	380	227	721	513	307	287	570
OTU_5000	Rotifera	Monogononta	Ploima	Synchaetidae	Synchaeta		99.47	Published	ATTATTGATTCTAAATTTCACTCAGGTATTTCTGTTGATTTAGCTATTTTTAGCTTACATTTAGCTGGTATTTCTTCTATTTTAGGTAGTATTAATTTTATAACTACTATTATTTGTTCTCGTACAACTAAAATAATTAGTATAGATCGTTTACCTTTAATATTATGATCATTAGGTGTAACAGCTTTTCTTTTACTAACTTTTTA	0	1	6	0	4	4	4	6	0	3	9	1	4	1	0	1	0	1	0	0	9	7	3	4	15	8	6	2	8	10	16	1	4	4	0	3	2	0
OTU_6	Rotifera	Monogononta	Ploima	Synchaetidae	Synchaeta		96.92	Published	ATTATCTGATTCTAAATTTCATTCAGGTATTTCTGTTGATTTAGCTATTTTTAGCTTACATTTAGCTGGTATTTCTTCTATTTTAGGTAGTATTAACTTTATGACTACTATTATCTGTTCTCGTACAACTAAAATAATTAGTATAGATCGTTTACCTTTAATATTATGATCGTTAGGTGTAACAGCTTTTCTTTTATTAACTACTTTA	158	13474	8061	3895	5241	9481	11768	7656	5304	11191	12426	5935	6830	3903	6703	4695	3750	3712	3156	38	32445	24156	9080	13249	17336	21102	15368	12054	21604	20884	15973	8897	7171	15259	9838	7006	8148	6106
OTU_8	Rotifera	Monogononta	Ploima	Brachionidae	Keratella		96.92	Published	TCTCTCCGACTCTAAGTATCATTCTGGTATTTCAGTTGACTTGGCTATTTTCAGTCTTCATTTAGCAGGAATTTCTTCCATTCTTGGTAGGATTAATTTTCTTACTACTATCATTTGCTCTCGCACAACTAAGGTTATCTCTCTTGATCGTATGCCTCTAATGCTTTGGGCTATTTCTGTTACTGCTGTTCTTTTAATTACTAGGTTG	2	3798	15	5900	1213	21696	9795	15916	12629	12289	15750	19325	11509	12788	11060	15668	7774	22364	15688	0	689	0	408	183	1552	437	1460	1257	1003	1411	900	1739	1112	789	2254	923	2554	1323
OTU_10	Rotifera	Monogononta	Ploima	Brachionidae	Brachionus		95.83	Published	CCTTTCTGACTCTACCTATCATAGAGGTGTTTCTGTTGATCTTGCTATTTTTAGTTTACATCTTTCTGGTGTTTCTTCAATTTTAGGTAGAATCAACTTTTTAACTACTATTATTTGTTCACGTACTACTAAAAGAATTTCTTTGGATCGTCTTCCTCTTATGTTATGATCTCTTGCTGTTACGGCTATTCTTTTAATTACTAGATTA	0	568	0	346	391	3829	817	2757	1217	1686	1484	1143	1266	641	1205	546	859	1245	201	0	1995	0	865	834	7701	1511	6379	3138	2206	2606	1011	1689	1464	3780	1384	1894	3254	656
OTU_11	Rotifera	Monogononta	Ploima	Synchaetidae	Polyarthra		95.31	Published	TCTGTCTGATGCTAAGTATCATTCTGGTATCTCTGTTGATCTTGCTATTTTCAGTCTTCATTTAGCTGGTGTCTCTTCTATTTTAGGTAGAATCAATTTTCTTACTACTATTGTGTGTTCTCGTACTACTAAGCTAATCTCTTTGGATCGTTTACCTTTATTGCTATGAGCTATCTCTATTACTGCTATCTTACTTATTACAAGACTT	20978	3917	722	1139	1150	107	4514	580	2308	4735	318	1218	3997	4825	5287	1714	2952	3509	3441	13309	3148	434	352	338	70	887	278	1197	1668	167	361	1624	2865	1927	1104	1426	1987	1818
OTU_12	Rotifera	Monogononta	Ploima	Synchaetidae	Polyarthra		95.31	Published	TCTCTCCGATTCTAAGTATCACTCTGGAATCTCTGTAGACCTAGCTATTTTCAGACTTCATCTAGCAGGTGTTTCTTCTATTCTTGGTAGAATTAACTTCCTTTCTACTATCATTTGTTCACGTACAACAAAACTTATTTCTCTAGATCGTCTCCCTCTTATGCTTTGAGCTATGTCTGTAACAGCTGTTCTTCTAGTTACTAGACTA	1301	10281	18114	4145	4460	2975	13122	3476	658	1720	1600	1774	5216	6133	7698	2960	4358	6306	6860	829	4757	7759	547	496	581	1124	1028	245	365	488	282	903	2704	1851	1146	1786	2325	2192
OTU_13	Rotifera	Monogononta	Ploima	Synchaetidae	Synchaeta		97.44	Published	TCTTTCAGATTCTAAATTTCATTCAGGAATTTCGGTAGATTTAGCTATTTTTAGTTTACATTTAGCTGGGATTTCTTCTATTATAGGAAGAATTAACTTTATAACTACTATTATTTGTTCTCGTACAACAAAAATAATTAGTATAGATCGTCTTCCTTTAATAATTTGATCTTTAGGTGTAACAGCTTTTCTTTTAGTTACTACATTA	360	863	1727	641	75	428	1156	183	313	813	1064	567	1216	1362	1445	521	494	1725	824	1162	2047	4284	1543	327	1204	3425	592	631	3278	2006	4627	1860	3994	3386	1349	761	4102	1970
OTU_23	Rotifera	Monogononta	Ploima	Brachionidae	Keratella		97.92	Published	CCTCTCCGACTCTAAGTATCATTCTGGTATTTCAGTTGACTTAGCTATTTTCAGTCTTCATTTAGCAGGAATTTCTTCCATTCTTGGTAGGATTAATTTTCTTACTACTATCGTTTGCTCTCGCACAACTAAGGTTATCTCTCTTGATCGTATGCCTCTAATGCTTTGGGCTATCTCTGTCACTGCTATTCTTTTGATTACTAGGTTG	0	117	63	4165	12	2520	337	1072	1949	399	354	2693	979	1656	899	1298	1517	2151	901	0	29	4	211	0	149	3	52	102	18	24	89	184	124	17	172	131	179	79
OTU_24	Rotifera	Monogononta	Ploima	Brachionidae	Keratella		96.95	Published	CCTCTCTGATTCTAAGTACCATTCCGGTATTTCAGTTGATCTTGCTATTTTTAGTCTTCATTTAGCAGGAATTTCTTCTATTCTTGGCAGAATTAATTTTCTTACTACCATTGTTTGCTCTCGTACTACTAAAGTCATTTCCCTTGATCGTATGCCTCTTATACTTTGAGCTATCTCAGTTACTGCTGTCCTTTTGATTACTAGATTG	0	1030	1159	2579	777	5104	2689	1212	1721	6089	2176	2379	3618	3603	2749	3715	1887	3612	1371	0	81	138	138	56	221	69	84	116	342	126	109	317	183	210	303	124	279	60
OTU_32	Rotifera	Monogononta	Ploima	Synchaetidae	Polyarthra		95.91	Published	CCTATCTGACTCTAAGTTCCATTCTGGAATTTCTGTAGACCTTGCCATTTTTAGTTTACATCTTGCTGGTATCTCTTCTATTCTTGGTAGAATCAATTTTCTTTCTACAATTATTTGTTCTCGAACAACCAAGCTTGTTTCTCTAGATCGTCTTCCTCTGATGCTATGAGCTCTAGCTGTCACAGCAGTTCTGCTGGTTACTAGACTA	0	6492	2689	1902	1686	1500	4594	262	830	1578	2153	637	772	576	743	422	727	474	604	0	1368	530	238	164	225	180	56	207	296	369	126	137	51	216	113	232	114	177
OTU_35	Rotifera	Monogononta	Ploima	Brachionidae	Brachionus		97.92	Published	CCTTTCTGACTCTACCTATCATAGAGGTGTTTCTGTTGATCTTGCTATTTTTAGTTTACATCTTTCTGGTGTTTCTTCGATTTTAGGTAGAATTAACTTTTTAACTACTATTATTTGTTCACGCACTACTAAAAGTATTTCTTTGGACCGTCTTCCTCTTATGTTATGAGCTCTTGCTGTTACGGCTATTCTTTTAATTACTAGACTA	0	10	34	37	10	177	85	205	358	218	259	266	276	141	155	36	163	347	45	0	37	21	88	25	291	79	447	879	310	526	149	748	64	526	120	295	839	92
OTU_41	Rotifera	Monogononta	Ploima				89.58	Published	CCTCTCTGATTCAAAGTATCATAGAGGTATTTCCGTAGATTTGGCAATTTTTAGTCTTCACTTAGCAGGTATTTCTTCTATTTTAGGTAGAATTAACTTCATGACTACAGTTCTATGTTCTCGAACAACAAAGCTCATTTCTTTAGATCGTATACCATTAATGTTATGGGCTCTGTCTATTACGGCTCTTCTTCTCGTAACTAGTTTA	0	0	0	295	117	404	67	631	283	501	122	479	173	184	156	135	56	654	87	0	0	0	93	42	126	9	220	162	133	76	159	66	151	55	106	26	381	53
OTU_46	Rotifera	Monogononta	Ploima	Brachionidae	Anuraeopsis		95.1	Published	TCTTTCTGACTCTAAATATCACAGGGGTGTATCCGTAGATTTAGCAATTTTTAGCCTTCACTTAGCAGGTATTTCTTCCATCCTTGGTAGTATCAACTTTATAACTACAGTTCTATGTTCACGAACAACAAAAATAATCTCTCTCGATCGCATGCCTTTAATGTTATGAGCTCTGTCTATTACTGCTCTTCTATTGGTTACTAGACTT	0	0	0	214	53	173	279	286	84	74	116	519	0	0	248	221	242	178	85	0	0	0	119	32	197	64	265	121	67	119	389	0	78	363	282	232	290	44
OTU_47	Rotifera	Monogononta	Ploima	Synchaetidae	Synchaeta		95.9	Published	ATTATCTGATTCTAAATTTCATTCTGGTATTTCTGTCGATTTAGCTATTTTTAGCTTACATTTAGCTGGTATTTCTTCTATTTTAGGTAGTATTAATTTTATAACTACTATTATTTGTTCTCGTACAACTAAAATAATTAGTATAGATCGTTTACCTTTAATATTATGATCATTAGGTGTAACAGCTTTTCTTTTACTAACTACTTTA	0	38	140	7	69	155	311	154	39	96	286	117	129	59	100	120	80	80	114	0	138	468	10	60	338	383	391	171	238	542	128	139	131	270	245	160	187	249
OTU_61	Rotifera	Monogononta	Ploima	Brachionidae			94.68	Published	CCTTTCGACTCTACCTATCATAGGGGTGTTTCTGTTGATCTTGCTATTTTTAGTTTACATCTTTCTGGTGTTTCTTCAATTTTAGGTAGAATTAACTTTTTAACTACTATTATTTGTTCACGACTACTAAAAGTATTTCTTTGGATCGTCTTCCTCTTATGTTATGAGCTCTTGCTGTTACGGCTATTCTTTTAATTACTAGACTA	0	0	0	5	2	33	15	15	13	22	29	19	13	8	15	5	6	8	6	0	0	0	6	0	41	19	36	33	27	38	29	46	12	29	22	17	16	13
OTU_69	Rotifera	Monogononta	Ploima	Synchaetidae	Polyarthra		95.83	Published	TCTGGCAGATGCTAAATATCATTCAGGTATTTCTGTTGATTTGGCGATTTTTAGTCTTCATCTAGCTGGAGTTTCTTCTATTTTAGGAAGAATTAATTTTTTAACTACTATTTGTTCTCGTACTACAAAATTGATTTCTATGGATCGTTTACCTTTATTATTATGAGCAATTTCAGTTACAGCTGTATTGTTAATTACAAGATTA	6705	3	7	1859	1876	814	1154	1670	4357	381	4617	1861	3387	2956	734	3100	1675	893	2115	9421	2	12	2719	1974	1117	2004	1918	5588	367	5379	1973	7244	42	1094	3275	1407	1250	2033
OTU_72	Rotifera	Monogononta	Ploima	Brachionidae	Keratella		97.4	Published	TCTGGCAGATGCTAAATATCATTCTGGTATTTCAGTTGACTTAGCTATTTTCAGTCTTCATTTAGCAGGAATTTCTTCCATTCTTGGTAGGATTAATTTTCTTACTACTATCATTTGCTCTCGCACAACTAAGGTTATCTCTCTTGATCGTATGCCTCTAATGCTTTGAGCTATTTCTGTTACTGCTGTTCTTTTAATTACTAGGTTG	0	10	0	59	38	69	52	184	112	41	102	183	65	46	91	152	154	109	182	0	0	0	6	3	14	6	25	27	3	18	5	12	19	10	35	22	22	11
OTU_78	Rotifera	Monogononta	Ploima	Euchlanidae			94.87	Published	CCTCTCAGATTCTAAATATCACTCTGGCATTTCAGTAGATCTAGCCATTTTTAGTCTTCATTTAGCTGGTATCTCATCTATTTTAGGTAGTATCAATTTTTTGACTACTATTATTTGTTCTCGTACAGCAAAAGCTATTTCACTCGATCGTATGCCTCTTATGTTGTGAGCATTTGCTGTTACTTCTGTGCTCCTTGTTACTAGTCTC	131	3	45	8	0	0	0	6	2	0	0	0	3	1	0	377	0	2	0	6	0	0	0	0	0	0	0	0	0	1	0	0	0	0	896	0	0	0
OTU_82	Rotifera	Monogononta	Ploima	Synchaetidae	Polyarthra		97.95	Published	TCTGGCTGATGCTAAGTACCATTCTGGTATTTCTGTTGATCTTGCTATTTTCAGTCTTCATTTAGCTGGTATTTCTTCTATTTTAGGTAGAATCAATTTCCTTACTACTATTGTGTGTTCTCGTACTACTAAGCTAATCTCTTTAGATCGTTTACCTTTATTACTATGAGCTATCTCTATTACTGCTATCTTACTTATTACAAGACTT	0	0	0	0	112	0	467	42	0	0	0	0	51	456	445	1	0	41	0	0	0	0	0	59	0	129	14	3	0	0	0	0	464	38	2	0	21	0
OTU_87	Rotifera	Monogononta	Ploima	Trichocercidae	Trichocerca		96.41	Published	CCTATCAGATTCAAAATACCACAGAGGTATTTCAGTCGACCTTGCAATTTTTAGTCTTCACATTGCCGGTGTTTCTTCTATTCTTGGTAGAATTAACTTCCTTACAACTATTATCTGTTCTCGTACAACTAAAATAATCTCTTTAGATCGTATGCCATTAATACTTTGAGCGTTAGCTGTTACAGCTATTCTTCTGATTACAAGACTT	0	0	530	101	18	168	153	310	142	45	129	103	0	0	39	23	75	19	86	0	0	35	15	0	122	34	193	115	33	88	18	0	23	7	13	23	11	51
OTU_91	Rotifera	Monogononta	Ploima	Synchaetidae	Polyarthra		96.92	Published	TCTGTCAGATGCTAAATATCATTCAGGTATTTCTGTTGATTTAGCGATTTTTAGTCTTCATTTGGCTGGAGTTTCCTCTATTTTAGGAAGAATTAATTTTTTGACTACTATTATTTGTTCTCGTACTACAAAATTGATTTCTATGGATCGTTTACCATTATTACTATGAGCAATATCAGTTACTGCTGTGTTGTTAATTACAAGACTA	0	0	0	143	255	0	0	277	0	0	0	264	0	0	0	0	0	0	0	0	0	0	96	236	0	0	323	0	0	0	270	0	0	0	0	0	0	0
OTU_96	Rotifera	Monogononta	Ploima	Synchaetidae	Polyarthra		95.9	Published	TCTGGCAGATGCTAAATATCATTCAGGTATTTCTGTTGATTTGGCTATTTTTAGTCTTCATTTAGCTGGAGTTTCTTCTATTTTAGGGAGAATTAATTTTTTAACTACTATTATTTGTTCTCGTACTACAAAATTGATTTCCATGGATCGTTTACTTTTGTTATTATGAGCAATTTCAGTTACAGCTGTATTGTTAATTACAAGACTA	0	0	0	252	852	369	41	466	545	346	238	402	533	389	291	698	980	93	272	0	0	0	242	419	523	37	474	600	327	307	276	690	90	369	667	844	115	266
OTU_111	Rotifera	Monogononta	Ploima	Synchaetidae	Polyarthra		97.44	Published	TCTGGCAGATGCTAAATATCATTCAGGTATTTCTGTTGATTTGGCGATTTTTAGTCTACAGGATTTAGCTGGAGTTTCTTCTATTTTAGGAAGAATTAATTTTTTAACTACTATTATTTGTTCTCGTACTACAAAATTGATTTCTATGGATCGTTTACCTTTGTTATTATGAGCAATTTCAGTTACAGCTGTATTGTTAATTACAAGACTA	14	13	26	224	1369	716	45	527	1520	1666	232	530	589	600	207	839	759	51	937	21	11	12	220	1269	846	74	500	1030	1870	238	385	1093	223	178	794	687	65	861
OTU_121	Rotifera	Monogononta	Ploima	Brachionidae			94.61	Published	TCTTTCTGACTCTAAATACCACAGAGGTGTATCCGTAGATTTAGCAATTTTTAGCCTTCATTTAGCAGGTATTTCTTCCATCCTTGGTAGTATTAACTTTATAACTACAGTTCTATGTTCACGAACAACAAAAATGATCTCTCTCGATCGCATGCCTTTAATGCTATGAGCTCTGTCTATTACTGCTCTTCTATTGGTTACTAGTCTT	0	0	0	0	0	0	0	8	39	0	149	0	0	0	0	0	91	123	0	0	0	0	0	0	0	0	1	80	0	128	0	0	53	0	0	145	165	0
OTU_126	Rotifera	Monogononta	Ploima	Synchaetidae			94.76	Published	TCTGTCAGATTCAAAGTTCCATTCAGGTATCTCTGTAGATTTAGCCATCTTCAGGCTTCATTTGGCTGGGGTTTCTTCAATTTTAGGAAGAATCAACTTTCTAACTACTATTATTTGCTCACGTACAACTAAATTAGTGTCTTTAGACCGTCTTCCTCTTATACTCTGGGCTCTATCCGTTACTGCTGTTCTTCTAGTGACTAGACTT	0	0	0	298	73	55	53	38	82	32	9	76	91	40	105	75	36	5	9	0	0	0	83	19	14	6	6	38	9	3	13	22	6	44	38	11	1	4
OTU_167	Rotifera	Monogononta	Ploima	Lepadellidae			91.58	Private	TCTTTCTGATTCTAAGTATCATAGAGGTGTTTCTGTAGATCTTGCAATTTTCAGTCTTCATCTTGCTGGTATTTCTTCCATTCTCGGAAGTATTAATTTCTTGACTACTGTTATTTGTTCTCGTACAAGTAAAGTGGTTTCTATGGATCGTCTTCCGTTGTTTTTATGGGCTACTAGTCTCACGGCTATTCTTCTTATTACTAGATTG	0	0	6	4	0	0	57	0	0	0	0	301	65	0	65	0	0	118	90	0	0	0	0	0	0	6	0	0	0	0	45	0	0	18	0	0	31	24
OTU_191	Rotifera	Monogononta	Ploima	Synchaetidae	Polyarthra		96.35	Published	TCTGGCAGATGCTAAATATCATTCAGGTATTTCTGTTGATTTTGGCGATTTTAGTCTTCATTTAGCTGGAGTTTCTTCTATTTTAGGAAGAATTAATTTTTTAACTACTATTATTTGTTCTCGTACTACAAAATTGATTTCTATGGATCGTTTACCTTTGTTATTATGAGCAATTTCAGTTACAGCTGTATTGTTAATTACAAGATTA	2789	2705	5497	23133	21082	7663	2113	11000	16784	8667	6562	12268	9576	7951	8164	8790	14362	4014	11125	3331	2739	6468	24189	22126	9243	2834	10504	17159	8686	5956	12187	8291	5454	8060	7334	12091	3987	9561
OTU_193	Rotifera	Monogononta	Ploima	Synchaetidae	Synchaeta		95.9	Private	TTTATCTGATTCTAAATTTCATTCTGGAATTTCTGTTGATCTTGCTATTTTTAGTCTTCATTTAGCTGGTATTTCTTCTATTATAGGAAGAATTAATTTTATGACTACTATTATTTGTTCTCGTACTACTAAGATAATTAGAATAGACCGTTTACCTTTAATAATTTGATCTTTAGGGGTTACAGCATTTCTTTTAGTTACTACTCTT	0	0	0	243	0	0	0	0	22	0	0	0	0	0	0	0	0	0	138	0	0	0	192	0	0	0	0	34	0	0	0	0	0	0	0	0	0	107
OTU_209	Rotifera	Monogononta	Ploima	Synchaetidae	Polyarthra		97.44	Published	TCTGGTATGCTAAATATCATTCAGGTATTTCTGTTGATTTGGCGATTTTTAGTCTTCATTTAGCTGGAGTTTTCTTCTATTTTAGGAAGAATTAATTTTTTAACTACTATTATTTGTTCTCGTACTACAAAATTGATTTCTATGGATCGTTTACCTTTGTTATTATGAGCAATTTCAGTTACAGCTGTATTGTTAATTACAAGATTA	174	144	281	1116	857	390	101	543	718	419	292	617	464	406	331	423	712	208	466	259	194	455	1728	1110	696	202	752	1236	621	452	735	644	347	541	549	918	313	701
OTU_215	Rotifera	Monogononta	Ploima	Synchaetidae	Synchaeta		96.86	Published	ATTATCTGATTCTAAATTTCATTCTGGTATTTCTGTTGATTTAGCTATTTCAGTTTACATTTAACTGGTATTTCTTCTATTTTAGGTAGTATTAATTTTATAACTACTATTATTTGTTCTCGTACAACAAAGATAATTAGTATAGATCGTTTACCACTAATGTTATGATCATTAGGTGTTACTGCCTTTTTATTACTAACTTTTG	36	0	0	0	1	2	0	1	3	2	3	5	2	2	3	1	0	2	1	71	6	0	4	4	9	13	15	2	7	4	18	13	3	8	10	1	9	17
OTU_221	Rotifera	Monogononta	Ploima	Brachionidae	Brachionus		96.81	Published	CCTTTCTGACTCTACCTATCATAGGGGTGTTTCTGTTGATCTTGCTATTTTTAGTTTACATCTTTCTGGTGTTTCTTCAATTTTAGGTAGAATTAACTTTTTACTATTATTTGTTCACGCACTACTAAAAGTATTTCTTTGGATCGTCTTCCTCTTATGTTATGAGCTCTTGCTGTTACGGCTATTCTTTTAATTACTAGACTA	0	23	2	22	33	403	216	269	266	335	286	209	205	188	155	101	162	77	114	0	45	0	85	54	796	259	502	516	481	735	199	836	277	303	349	206	241	244
OTU_232	Rotifera	Monogononta	Ploima				85.64	Published	ACTCTCCGATTCTAAATACCACAGGGGTATTTCTGTTGACTTAGCTATTTTTAGTCTGCATGTCGCAGGTATTTCATCTATTCTGGGTAGAATCAACTTCTTAACTACAATTATTTGTTCTCGTACAACCAAAATAATCTCCTTAGATCGTATGCCTCTAATGCTCTGAGCCCTAGCTGTCACTTCTATTCTTTTAGTTACAAGGCTA	0	29	0	0	20	3	39	30	41	46	43	38	19	9	41	17	6	0	19	0	14	0	0	3	2	14	13	11	19	20	6	2	3	22	9	5	0	10
OTU_239	Rotifera	Monogononta	Ploima	Brachionidae			90.69	Published	TCTATCCGATTCTAAATTCCACAGAGGTATCTCTGTAGATTTAGCAATCTTTAGTCTTCATCTAGCTGGTATCTCTTCTATTTTAGGAAGAATCAACTTTTTGACAACTATTATTTGCTCACGTACCGCCAAGGCTATCTCTTTAGATCGAATGCCTCTTATGCTTTGAGCTCTTTCTATTACAGCCGTTCTTTTAATCACCAGTCTT	0	0	0	0	0	0	0	51	91	0	0	0	0	0	0	0	0	0	0	0	0	0	0	0	0	0	27	124	0	0	0	0	0	0	0	0	0	0
OTU_243	Rotifera	Monogononta	Ploima	Brachionidae			94.95	Published	TCTATCAGACAGAAAATTTCACACAGGAATTTCTGTTGATTTAGCTATTTTTAGTCTCCATTTAGCTGGAATTTCTTCTATTCTAGGAAGAATTAACTTTCTAACAACTATTCTAGTTTCTCGCATGAGATCTAGACTTAGTCTTGCTCGTCTGCCCCTATTCCTATGATCAGTAGCCATCACAGCCGTTCTACTTATTGTTAGTCTC	0	31	0	49	36	57	0	0	0	0	0	0	0	0	0	0	0	0	0	0	57	0	29	22	80	0	0	0	0	0	0	78	0	0	0	0	0	0
OTU_269	Rotifera	Monogononta	Ploima	Synchaetidae	Synchaeta		95.38	Published	ATTATCTGATTCTAAATTTCACTCAGGTATTTCTGTTGATTTAGCTATTTTTAGCTTACATTTAGCTGGTATTTCTTCTATTTTAGGTAGTATTAATTTTATAACTACTATTATTTGTTCTCGTACAACTAAAATAATTAGTATAGATCGTTTACCTTTAATATTATGATCATTAGGTGTTACTGCCTTTTTATTACTAACTACTTTG	2	15	45	3	30	44	96	48	12	25	72	43	36	15	24	30	27	30	55	0	41	196	4	14	113	121	132	43	68	103	57	47	29	91	86	79	64	91
OTU_288	Rotifera	Monogononta	Ploima	Brachionidae	Brachionus		95.77	Published	CCTTTCTGACTCTACCTATCATAGGGGTGTTTCTGTTGATCTTGCTATTTTTAGTTTACATCTTTCTGGTGTTTCTTCAATTTTAGGTAGAATTAACTTTTTAACTACTATTATTTGTTCACGCACTACTAAAAGTATTTCTTTGGATCGTCTTCCTCTTATGTTATGAGCTCTTGCTGTTACGGCTATTCTTTTATTAACTACTTTA	0	0	0	2	5	40	14	28	31	29	24	24	15	18	9	11	17	12	12	0	2	0	9	5	95	14	55	48	40	46	9	46	27	33	30	14	33	21
OTU_299	Rotifera	Monogononta	Ploima	Synchaetidae	Polyarthra		96.95	Published	TCTTTCTGACTCTAAGTACCATTCAGGTATTTCAGTAGATTTAGCTATTTTTAGTCTTCATCTTGCTGGAGTTTCATCTATTTTGGGTAGAATTAATTTTCTTTCAACAATTATTTGCTCTCGAACAACTAAGATAATCTCTCTTGACCGTTTACCTTCCTGTGATCTGTATCTATCACTGCTATTCTATTAATTACAAGATTA	3	354	1172	709	257	298	713	124	3	225	1	392	787	593	870	584	1030	321	1047	0	671	3326	1102	425	782	1082	372	20	361	23	642	1450	1524	1884	1331	1999	812	2210
OTU_300	Rotifera	Monogononta	Ploima	Synchaetidae	Polyarthra		97.06	Published	TCTATCAGACTCAAAATTTCATTCGGGCATTTCTGTAGATTTAGCTATCTTTAGACTTCATTTAGCTGGTGTTTCTTCAATTCTAGGGAGAATTAACTTTCTAACTACTATCATTTGTTCTCGTACTACTAAGTTGGTGTCTTTAGATCGCCTACCACTTTTACTCTGAGCTATGTCTGTTACTGCCGTTCTTCTAGTTACTAGACTT	0	0	0	0	163	58	0	0	0	0	0	47	0	0	0	5	0	0	0	0	0	0	0	19	6	0	0	0	0	0	24	0	0	0	2	0	0	0
OTU_301	Rotifera	Monogononta	Ploima	Synchaetidae	Polyarthra		98.96	Published	TCTGTCTGATGCCAAATACCATTCTGGTATTTCTGTTGATCTTGCTATTTTCAGTCTTCATCTGGCCGGAGTCTCATCTATTCTGGGTAGAATTAATTTTCTTACAACAATTATCTGTTCTCGTACTACTAAGCTAATTTCTTTAGACCGCTTACCTTTACTGCTCTGAGCTATGTCTATTACAGCTATTCTACTTGTTACAAGTTTA	0	0	0	0	0	6	12	0	20	43	46	32	0	0	0	0	0	22	0	0	0	0	0	0	6	5	0	12	23	40	9	0	0	11	0	0	25	0
OTU_323	Rotifera	Monogononta	Ploima	Mytilinidae			90.4	Private	TTTAGCTGATTCTAAGTACCACAGAGGAATCTCTGTTGACTTAGCAATCTTTAGTTTACACTTAGCTGGTATCTCTTCTATTTTAGGTAGAATTAACTTTCTATCTACTATTATTTGTTGTCGTACAACAAAGATAATTTCAATAGATCGTCTTCCTTTAATGCTCTGAGCGTTAGCTGTTACAGCTCTGCTTTTAGTGACAAGACTT	0	0	0	0	0	5	0	0	31	51	0	0	0	0	0	0	0	0	0	0	0	0	0	0	9	0	0	54	97	0	0	0	0	0	0	0	0	0
OTU_324	Rotifera	Monogononta	Ploima	Synchaetidae	Polyarthra		97.98	Published	TCTTTCTGACTCTAAGTACCATTCAGGTATTTCAGTAGATTTAGCTATTTTTAGTCTTCATCTTGGAGTTTCATCTATTCTGGGTAGAATTAATTTTCTTTCAACAATTATTTGTTCTCGAACAACTAAGATAATCTCTCTTGACCGTTTACCTTTATTCTTGTGATCTGTATCTATCACTGCTATTCTATTAATTACAAGATTA	0	0	0	2	0	0	9	0	0	0	4	0	30	0	27	8	3	1	6	0	0	0	7	0	2	18	0	0	0	12	0	1	6	97	11	10	3	37
OTU_351	Rotifera	Monogononta	Ploima	Proalidae			92.19	Published	CCTCTGATTCAAAGTACCATAGAGGTATTTCTGTAGACTTGGCAATTTTTAGTCTTCACTTAGCAGGTATTTCTTCTATTTTAGGTAGAATTAATTTCATAACTACAGTTCTATGTTCTCGAACAACAAAGCTCATTTCTTTAGATCGTATACCATTAATGTTATGGGCTCTGTCTATTACGGCTCTTCTCCTCGTAACTAGTTTA	0	0	0	124	88	114	239	147	164	34	0	338	0	47	0	182	146	613	187	0	0	0	68	55	39	19	112	134	12	0	85	72	36	0	245	116	393	109
OTU_375	Rotifera	Monogononta	Ploima	Synchaetidae	Synchaeta		97.91	Published	ATTATCTGATTCTAAATTTCATTCTGGTATTTGTTGATTTAGCTATTTTCAGTTTACATTTAGCTGGTATTTCTTCTATTTTAGGTAGTATTAATTTTATAACTACTATTATTTGTTCTCGTACAAAAGATAATTAGTATAGATCGTTTACCACTAATGTTATGATCATTAGGTGTTACTGCCTTTTTATTACTAACTACTTTG	276	20	0	6	9	24	40	37	11	20	20	30	17	23	14	15	6	26	24	362	50	0	16	40	51	77	79	17	61	29	99	39	34	37	35	7	90	52
OTU_413	Rotifera	Monogononta	Ploima	Synchaetidae	Polyarthra		97.94	Published	TCTGGCAGATGCTAAATATCATTCAGGTATTTCTGTTGATTTGGCGATTTTTTAGTCTCATTTAGCTGGAGTTTCTTCTATTTTAGGAAGAATTAATTTTTTAACTACTATTATTTGTTCTCGTACTACAAAATTGATTTCTATGGATCGTTTACCTTTGTTATTATGAGCAATTTCAGTTACAGCTGTATTGTTAATTACAAGATTA	59	64	126	518	454	180	46	262	435	199	172	276	244	193	174	227	340	112	278	81	77	211	797	459	241	76	323	511	204	190	325	274	141	226	224	373	100	234
OTU_419	Rotifera	Monogononta	Ploima	Synchaetidae	Polyarthra		95.98	Published	CTTGTCTGACTCAAAATATCATTCTGGTATTTCTGTTGACTTAGCTATTTTTAGACTTCATCTTGCAGGTATTTCGTCAATTTTAGGAAGAATTAATTTTCTTTCAACTATTATTTGTTCTCGTACTACTAAGTTAGTTTCTCTAGATCGTTTACCTCTTATACTTTGAGCTCTAGCTGTAACAGCTGTTCTTCTTGTTACAAGACTT	0	0	0	0	32	5	3	10	22	15	4	33	0	0	2	4	1	0	0	0	0	0	0	11	3	2	4	17	5	0	0	0	0	1	1	0	0	0
OTU_421	Rotifera	Monogononta	Ploima	Brachionidae	Keratella		96.84	Published	CCTATCTGATTCTAAGTACCATTCCGGTATTTCAGTTGATCTTGCTATTTTTAGCCTTCATCTAGCAGGAATTTCTTCTATCCTTGGTAGAATTAATTTTCTTACTACTATTGTTTGTTCTCGTACTACTAAAGTTATTTCCCTTGACCGTATGCCCCTTATACTTTGAGCTATCTCAGTTACTGCTGTTCTTTTGATTACTAGACTG	0	0	0	0	10	27	16	13	0	16	7	33	0	0	26	26	0	55	13	0	0	0	0	2	2	0	0	0	0	0	0	0	0	4	11	0	8	4
OTU_423	Rotifera	Monogononta	Ploima				87.06	Published	TTTGTCTGACTCTAAGTATCATAGTGGTATTTCTGTTGACTTAGCTATCTTTAGGCTTCATCTTTCTGGTGTTTCCTCTATCCTAGGAAGTATCAACTTTCTTACCACTATCCTCGTCTCTCGTATGACCTCTACTCTAAGGCTTGATCGTTTACCCCTCTTTCTTTGATCTATTGCTATCACTGCCGTTCTTTTAATTGTTAGTCTT	0	43	0	27	37	13	12	6	9	5	5	4	0	0	0	0	0	0	0	0	46	0	7	3	9	0	0	2	6	6	0	0	0	10	0	0	0	0
OTU_424	Rotifera	Monogononta	Ploima	Synchaetidae	Polyarthra		96.83	Published	TCTAGCAGATGCTAAATATCATTCAGGTATTTCTGTTGACTTGGCGATTTTTAGTCTTCATTTAGCTGGAGTTTCTTCTATTTTAGGGAGAATTAATTTTTTAACTACTATTTTGTTCTCGTACTACAAAATTGATTTCTATGGATCGTTTACCTTGTTATTATGAGCAATTTCAGTTACAGCTGTATTGTTAATTACAAGACTA	0	0	0	3	33	6	28	3	2	64	9	2	2	6	1	136	113	0	4	0	0	0	0	26	3	35	4	4	179	20	2	6	1	1	207	161	0	0
OTU_432	Rotifera	Monogononta	Ploima	Synchaetidae	Polyarthra		97.92	Published	TCTGGCAGATGCTAAATATCATTCAGGTATTTCTGTTGATTTGGCGATTTTTAGTCTTCATTTAGCTGGAGTTTCTTCTATTTTAGGAAGAATTAATTTTTTAACTACTATTATTTGTTCTCGTACTACAAAATTGATTTCTATGGATCGTTTACCTTTGTTATTATGAGCAATTTCAGTTACAGCTGTATTGTTATCGTTA	71	45	125	455	318	158	51	176	342	172	159	223	192	148	170	188	292	85	216	83	58	135	564	421	216	63	254	427	242	162	248	254	120	200	212	314	106	272
OTU_439	Rotifera	Monogononta	Ploima	Synchaetidae	Synchaeta		95.38	Published	ATTATCTGATTCTAAATTTCATTCTGGTATTTCTGTTGATTTAGCTATTTTCAGTTTACATTTAGCTGGTATTTCTTCTATTTTAGGTAGTATTAATTTTATAACTACTATTATTTGTTCTCGTACAACAAAGATAATTAGTATAGATCGTTTACCACTAATGTTATGATCATTAGGTGTAACAGCTTTTCTTTTACTAACTACTTTA	0	3	9	4	19	30	65	28	13	21	33	35	19	7	9	15	3	19	20	10	34	31	6	17	86	79	68	38	68	86	27	40	22	41	53	20	46	35
OTU_441	Rotifera	Monogononta	Ploima	Synchaetidae			92.71	Published	TCTGGCAGATGTTAAATATCATTCAGGTATTTCTGTTGATTTGGCGATTTTTAGTCTTCATTTAGCTGGAGTTTCTTCTATTTTAGGAAGAATTAATTTTTTAACTACTATTATTTGTTCTCGTACTACAAAATTGATTTCTATGGATCGTTTACCTTTGCTTATGAGCAATTTCAGTTACAGCTGTATTGTTAATTACAAGACTA	2	2	8	51	19	23	399	24	29	19	14	19	16	13	11	221	22	5	22	3	3	10	30	30	20	600	17	26	23	11	25	16	4	14	296	23	5	15
OTU_459	Rotifera	Monogononta	Ploima	Synchaetidae	Polyarthra		96.41	Published	TCTATCTGATGCTAAGTATCACTCTGGTATTTCTGTTGATCTTGCTATTTTCAGTCTTCATTTAGCCGGTGTCTCTTCTATTTTAGGTAGAATCAATTTTCTTACTACTATTGTGTGTTCTCGTACTACTAAGCTAATCTCTTTAGATCGTTTACCTCTATTACTATGAGCTATCTCTATTACTGCTATCTTACTTATTACAAGACTT	0	0	0	0	0	1	11	0	1	0	0	0	4	6	13	1	8	4	51	0	2	0	0	0	0	1	0	0	0	0	0	0	2	0	0	5	1	29
OTU_464	Rotifera	Monogononta	Ploima	Synchaetidae			90.48	Published	TCTATCTGATGCTAAGTATCATTCTGGTATTTCTGTTGATCTTGCTATTTTCAGTCTTCATTTAGCTGGTGTCTCTTCTATTTTAGGTAGAATCAATTTTCTTACTACTATTGTGTGTTCTCGTACTACTAAGCTAATCTCTTTGGATCGTTTACCTTTATTACTATGGGTCTCTATTACTGCTATCTTACTTATTACAAGACTT	0	41	0	7	19	35	184	8	58	16	47	21	191	140	188	179	89	264	48	0	35	0	0	7	20	32	2	55	10	24	14	44	62	111	168	46	213	16
OTU_473	Rotifera	Monogononta	Ploima	Synchaetidae	Polyarthra		95.24	Published	CCTGTCTGATGCTAAGTATCATTCTGGTATTTCTGTTGATCTTGCTATTTTCAGTCATTTAGCTGGTGTCTCTTCTATTTTAGGTAGAATCAATTTTCTTACTACTATTGTGTGTTCTCGCACTACTAAGCTAATCTCTTTAGATCGTTTACCTTTATTACTATGAGCTATCTCTATTACTGCTATCTTACTTATTACAAGACTT	0	20	0	1	0	6	43	2	6	8	0	4	38	18	45	4	106	26	1	0	27	0	0	0	1	10	0	3	7	0	0	10	5	19	11	30	7	1
OTU_477	Rotifera	Monogononta	Ploima				89.42	Published	TCTGGCAGATGCTAAATATCATTCAGGTATTTCTGTTGATTTGGCGATTTTTAGTCTTCATTTAGCTGGAGTTTCTTCTATTTTAGGAAGAATTAATTTTTTAACTACTATTATTTGTTCTCGTACTACAAAATTGATTTCTATGGATCGTTTGTTATTATGAGCAATTTCAGTTACAGCTGTATTGTTAATTACAAGATTA	52	58	110	417	345	139	35	228	332	140	121	260	178	148	164	176	299	75	224	68	56	165	545	415	211	52	233	327	192	137	311	221	124	181	128	270	69	201
OTU_487	Rotifera	Monogononta	Ploima				89.27	Published	TTTGTCAGACTCAAAGTACCACAGAGGTATTTCGGTTGACCTTGCTATTTTTAGACTTCATATTGCTGGTATTTCTTCTATTCTTGGGAGAATTAACTTTCTTACAACTATTATCTGTTCCCGTACAACTAAAATGATCTCTTTAGATCGTATGCCGTTAATGCTTTGGGCACTAGCTGTAACAGCTATTCTTCTTATTACAAGGCTT	0	0	0	0	0	0	0	0	20	0	8	47	0	0	36	0	0	0	0	0	0	0	0	0	0	0	0	5	0	0	5	0	1	5	0	0	0	0
OTU_488	Rotifera	Monogononta	Ploima	Lecanidae			90.2	Published	TTTGTCAGATTCTAAGTTTCATACAGGTATTTCTGTTGATTTAGCTATTTTTAGACTTCATTTAGCTGGGATTTCTTCAATTTTAGGGAGAATTAATTTTTTAACTACTATTATTTGTTCTCGTACAACAAAAATAATTTCAATAGATCGTCTTCCTTTAATGATTTGGGCTTTAGCTGTCACTGCAGTTTTACTGGTCACTAGTCTT	0	0	0	0	0	0	0	0	0	0	0	34	0	0	0	0	0	0	0	0	0	0	0	0	0	0	0	0	0	0	49	0	0	0	0	0	0	0
OTU_520	Rotifera	Monogononta	Ploima	Synchaetidae	Synchaeta		97.35	Published	ACTATCTGATTCTAAATTTCATTCTGGAATTTCTGTTGATCTTGCAATTTTTAGTTTACATATTGCCGGTATTTCATCAATCTTAGGTAGAATTAATTTTATAACTACTATTGTTTGTTCTCGTACTACAAAGATAGTAAGAATAGATCGTCTACCTTTAATAATTTGATCATTAGGAGTAACTGCTTTTCTTTTAGTAACTACTTTA	0	0	0	0	0	1	5	2	0	0	0	1	0	0	0	0	0	0	0	0	0	0	0	0	1	9	0	0	0	3	0	0	2	0	0	0	8	0
OTU_521	Rotifera	Monogononta	Ploima	Synchaetidae	Synchaeta		95.38	Published	ATTATCTGATTCTAAATTTCATTCTGGTATTTCTGTTGATCTTGCAATTTTTAGTCTTCATATTGCTGGTATTTCATCTATTCTAGGTAGGATTAATTTTATAACTACTATTGTTTGTTCTCGTACTACAAAAATAGTGAGAATAGACCGTCTTCCTTTAATAATTTGATCATTAGGAGTGACAGCATTTCTTTTAGTAACGACTTTA	0	0	0	16	0	2	0	5	0	0	0	0	0	0	0	0	0	0	5	0	0	0	53	0	9	0	24	0	0	0	0	0	0	0	0	0	0	14
OTU_532	Rotifera	Monogononta	Ploima	Synchaetidae	Polyarthra		97.41	Published	TCTGGCAGATGCTAAATATCATTCAGGTATTTCTGTTGATTTGGCGATTTTTAGTCTTCATTTAGCTGGAGTTTCTTCTATTTTAGGAAGAATTAATTTTTTTAACTTATTATTTGTTCTCGTACTACAAAATTGATTTCTATGGATCGTTTACCTTTGTTATTATGAGCAATTTCAGTTACAGCTGTATTGTTAATTACAAGATTA	97	54	134	468	303	155	34	178	270	166	122	209	203	142	128	166	250	67	195	99	78	115	574	368	214	68	277	407	231	114	245	194	111	185	166	311	98	244
OTU_540	Rotifera	Monogononta	Ploima	Brachionidae	Brachionus		97.35	Published	CCTTTCTGACTCTACCTATAGGGGTGTTTCTGTTGATCTTGCTATTTTTAGTTTACATCTTTCTGGTGTTTCTTCAATTTTAGGTAGAATTAACTTTTTAACTACTATTATTTGTTCACGCACTACTAAAAAGTATTTCTTTGGATCGTCTTCCTCTTATGTTATGAGCTCTTGCTGTTACGGCTATTCTTTTAATTACTAGACTA	0	59	133	288	139	469	417	316	398	316	422	358	226	178	175	77	173	291	185	0	223	152	554	193	751	497	709	735	409	715	264	390	264	433	257	306	707	374
OTU_551	Rotifera	Monogononta	Ploima	Synchaetidae			93.23	Published	ATTATCTTCTAAATTTCATTCTGGTACTTCTGTTGATTTAGCTATTTTCAGTTTACATTTAGCTGGTATTTCTTCTATTTTAGGTAGTATTAATTTTATAACTACTATTATTTGTTCTCGTACAACAAAGATAATTAGTATAGATCGTTTACCACTAATGTTATGATCATTAGGTGTTACTGCCTTTTTATTACTAACTACTTTG	320	11	2	13	23	66	67	63	23	21	25	53	32	20	25	30	7	49	54	446	54	10	22	63	90	126	148	54	89	51	166	69	65	58	74	13	149	110
OTU_560	Rotifera	Monogononta	Ploima	Synchaetidae	Synchaeta		96.88	Published	TCTTTCAGATTCTAAATTTCATTCAGGAATTTCAGTAGATTTAGCTATTTTTAGTTTACATTTAGCTGGGATTTCTTCTATTATAGGAAGAATTAACTTTATAACTACTATTATTTGTTCTCGTACAACAAAATAATTAGTATAGATCTCCCTTTAATAATTTGAGCTTTAGGTGTAACAGCTTTTCTTTTAGTTACTACATTA	0	0	0	0	9	3	71	24	38	27	25	50	13	49	0	32	1	18	40	0	0	0	0	46	7	182	46	56	75	51	397	33	178	1	77	0	62	138
OTU_573	Rotifera	Monogononta	Ploima				87.5	Published	TTTAGCGGACTCTAAATATCATAGAGGTATTTCTGTTGATCTAGCTATTTTTAGCCTTCATCTAGCAGGTATCTCTTCTATTTTAGGTAGTATCAACTTTCTATCTACTATCATTTGTTGTCGTACAACAAAGATAATTTCTATAGATCGTTTACCTTTGATGTTATGAGCGTTAGCTGTTACAGCATTACTTTTAGTAACAAGTCTG	0	0	0	0	0	0	0	0	0	25	0	0	0	0	0	0	0	0	0	0	0	0	0	0	0	0	0	0	75	0	0	0	0	0	0	0	0	0
OTU_577	Rotifera	Monogononta	Ploima	Synchaetidae			94.74	Published	TCTGGCAGATGCTAAATATCATTCAGGTATTTCTGTTGATTTGGCGATTTTTAGTCTTCATTTAGCTGGAGTTTCTTCTATTTTAGGAAGAATTAATTTTTTAACTACTATTATTTGTTCTCGTACAAAATTGACCTATGGATCGTTTACCTTTGTTATTATGAGCAATTTCAGTTACAGCTGTATTGTTAATTACAAGATTA	21	10	27	86	41	33	9	46	73	43	28	46	38	36	35	32	69	8	58	9	19	33	130	107	73	12	47	74	51	35	65	40	28	42	40	63	18	51
OTU_582	Rotifera	Monogononta	Ploima	Synchaetidae	Synchaeta		95.9	Published	ATTATCTGATTCTAAATTTCATTCAGGTATTTCTGTTGATTTAGCTATTTTTAGCTTACATTTAGCTGGTATTTCTTCTATTTTAGGAAGAATTAATTTTTTAACTACTATTATTTGTTCTCGTACAACAAAGATAATTAGTATAGATCGTTTACCACTAATGTTATGATCATTAGGTGTTACTGCCTTTTTATTACTAACTACTTTG	0	30	91	12	47	147	191	118	40	55	140	83	97	39	96	89	57	78	46	0	103	367	14	25	256	267	284	136	122	227	54	72	114	222	195	141	175	140
OTU_588	Rotifera	Monogononta	Ploima	Synchaetidae	Polyarthra		97.31	Published	TCTTTCTGACTCTAAGTACCATTCGGGTATTTCAGTAGATTTAGCTATTTTTAGTCTTCATCTTGCTGGAGTTTTCATCTATTCTGGGTAGAATTAATTTTCTTTCAACAATTATTTGCTCTCGAACAACTAAGATAATCTCTCTTGACCGTTTACCTTTATTCCTGTGATCTGTATCTATTACTGCCATTCTAAATTACAAGATTA	0	0	0	7	0	0	8	0	0	0	0	0	3	6	1	7	6	16	8	0	0	0	16	0	0	9	0	0	0	0	0	4	9	7	15	8	29	33
OTU_593	Rotifera	Monogononta	Ploima	Synchaetidae	Polyarthra		97.5	Published	TCTTTTCTGACTCTAAGTACCATTCAGGTATTTCAGTAGATTTAGCTATTTTTAGTCTTCATCTTGCTGGAGTTTCATCTTTTGGGTAGAATTAATTTTCTTTCAACAATTATTTGCTCTCGAACAACTAAGATAATCTCTCTTGACCGTTTACCTTTATTCCTGTGATCTGTATCTATCACTGCTATTCTATTAATTACAAGATTA	1	20	65	49	26	37	122	12	6	19	8	20	71	56	83	62	114	58	79	1	56	154	83	37	70	145	43	18	39	2	44	92	184	145	149	213	158	198
OTU_615	Rotifera	Monogononta	Ploima	Synchaetidae			91.33	Published	CCTGTCTGATGCTAAGTATCATTCTGGTATTTCTGTTGATCTTGCTATTTTCAGTCTTCATTTAGCTAGCTCTCTTCTATTTTAGGTAGAATCAATTTTCTTACTACTATTGTGTGTTCTCGTACTACTAAGCTAATCTCTTTAGATCGTTTACCTTTATTACTATGAGCTATCTCTATTACTGCTATCTTACTTATTACAAGACTT	0	731	0	43	66	78	1196	111	239	443	52	220	422	739	403	169	1002	334	208	0	624	0	11	29	33	284	27	135	149	18	42	380	365	25	147	449	195	119
OTU_647	Rotifera	Monogononta	Ploima	Synchaetidae	Polyarthra		96	Published	TCTTTCTGACTCTAAGTACCATTCAGGTATTTCAGTAGATTTAGCTATTTTTAGTCTTCATCATCTGGAGTTTCATCTATTCTGGGTAGAATTAATTTTCTTTCAACAATTATTTGCTCTCGAACAACTAAGATAATCTCTCTTGACCATTTACCTTTATTCCTGTGATCTGTATCTATTACTGCCATTCTATTAATTACAAGATTA	0	0	0	192	0	0	160	10	0	0	0	0	23	24	61	108	99	210	189	0	0	0	266	0	0	199	15	4	0	0	0	23	102	88	268	149	442	461
OTU_657	Rotifera	Monogononta	Ploima	Proalidae	Proales		97.55	Published	TTTAGCTGATTCTAAGTATCACAGAGGTATTTCTGTTGACTTAGCAATTTTTAGTCTTCATTTAGCTGGTATTTCTTCTATTTTAGGTAGTATTAATTTTTTATCTACTATTATTTGCTGTCGTACAACAAAAATGATTTCTATAGATCGTTTACCTTTAATGCTTTGAGCGTTAGCTGTTACAGCCTTGCTTTTAGTAACAAGACTT	0	0	0	0	0	0	0	0	0	0	0	0	0	0	0	0	0	0	0	0	0	0	0	0	0	0	0	0	0	0	0	0	0	51	0	0	0	0
OTU_702	Rotifera	Monogononta	Ploima	Brachionidae	Brachionus		97.95	Published	TTTGTCTGACTCTACTTATCATAGAGGAGTGTCTGTAGATTTAGCTATTTTTAGGTTACATGTTTCTGGTGTATCTTCTATTTTAGGAAGAATTAACTTTTTAACAACTATTATTTGTTCTCGTACAACAAAAAGAATTTCATTAGATCGTCTTCCTTTAATGTTATGGGCAATTGCAGTAACTGCAATCCTTCTTATTACTAGACTT	0	0	0	0	0	0	0	0	0	0	0	0	0	0	0	0	0	0	0	0	0	0	0	0	0	0	0	0	0	0	0	0	49	0	0	0	0	0
OTU_704	Rotifera	Monogononta	Ploima	Brachionidae	Brachionus		97.34	Published	CCTTTCTGACTCTACCTATCATAGGGGTGTTTCTGTTGATCTTGCTATTTTTAGTTTACATCTTTCTGGTGTTTCTTCAATTTTAGGTAGAATTAACTTTTTAACTACTATTATTGTTCACGCACTACTAAAAGTATTTCTTTGGATCGTCTTCCTCTTATGTTAGCTCTTGCTGTTACGGCTATTCTTTTAATTACTAGACTA	0	0	0	3	1	18	5	6	14	9	13	11	13	5	4	5	4	3	3	0	0	0	7	6	37	15	16	18	17	39	11	39	15	15	19	14	14	12
OTU_708	Rotifera	Monogononta	Ploima				88.71	Published	ATTATCTTCTAAATTTCATTCTGGTATTTCTGTCGATTTAGCTATTTTTAGCTTACATTTAGCTGGTATTTCTTCTATTTTAGGTAGTATTAATTATAACTACTATTATTTGTTCTCGTACAACAAAGATAATTAGTATAGATCGTTTACCATTAATGTTATGATCATTAGGTGTTACTGCCTTTTTATTACTAACTACTTTG	0	3	21	0	2	10	9	7	3	0	5	8	7	5	9	3	8	1	11	0	5	35	2	13	14	20	18	8	6	6	30	10	13	27	9	12	13	17
OTU_710	Rotifera	Monogononta	Ploima	Synchaetidae	Polyarthra		97.45	Published	TCTAGCAGATGCTAAATATCATTCAGGTATTTCTGTTGACTTGGCGATTTTTAGTCTTCATTTAGCTGGAGTTTCTTCTATTTTAGGGAGAATTTTTAACTACTATTATTTGTTCTCGTACTACAAAATTGATTTCTATGGATCGTTTACCTTTGTTATTATGAGCAATTTCAGTTACAGCTGTATTGTTAATTACAAGACTA	0	0	0	24	326	34	137	38	21	449	68	29	38	33	17	559	456	6	9	0	0	0	13	200	28	187	37	20	836	122	5	41	7	10	695	640	7	7
OTU_713	Rotifera	Monogononta	Ploima	Lecanidae			94.87	Published	TCTTTCTGATGCTAAGTTTCATTCTGGTATTTCTGTAGATTTAGCTATTTTTAGGTTGCATTTAGCTGGTGTTTCTTCAATTTTGGGTAGAATCAATTTTTTAACAACTATTATTTGTTCTCGAACAACAAAAATGGTTTCTATAGATCGTTTACCTTTGATAATTTGAGCTTTAGCGGTTACAGCAATTTTGTTGGTTACAAGATTG	0	0	0	0	0	0	0	1	7	0	0	0	0	0	0	9	0	10	0	0	0	0	0	0	0	0	0	4	0	0	0	0	0	0	7	0	8	0
OTU_725	Rotifera	Monogononta	Ploima	Synchaetidae	Polyarthra		96.91	Published	TCTGGCAGATGCTAAATATCATTCAGGTATTTCTGTTGATTTGGCTATTTTTAGTCTTCATTTAGCTGGAGTTTTCTTCTATTTAGGGAGAATTAATTTTTTAACTACTATTATTTGTTCTCGTACTACAAAATTGATTTCTATGGATCGTTTACCTTTGTTATTATGAGCAATTTCAGTTACAGCTGTATTGTTAATTACAAGACTA	0	0	0	207	625	269	37	429	421	410	217	337	538	470	279	496	736	94	211	0	0	0	185	698	408	52	402	386	358	281	378	560	97	409	511	600	110	210
OTU_732	Rotifera	Monogononta	Ploima				87.33	Published	TTTGTCTGACTCAAAGTATCATAGTGGTATTTCTGTTGACTTAGCCATCTTTAGGCTTCATCTTTCTGGTGTTTCCTCTATCCTAGGAAGTATTAACTTTCTTACTACCATCCTCGTTTCTCGTATGACTTCTACTCTAAGGCTTGATCGTTTACCCCTCTTTCTTTGATCTATTGCTATCACAGCCGTTCTTTTAATTGTTAGTCTT	0	0	0	67	4	13	1	2	0	0	0	0	0	0	0	0	0	0	0	0	0	0	19	0	7	0	0	0	0	0	0	0	0	0	0	0	0	0
OTU_734	Rotifera	Monogononta	Ploima	Synchaetidae	Synchaeta		97.37	Published	ATTATCTGATTCTAAATTTCATTCTGGAATCTGTTGATCTTGCAATTTTTAGTCTTCATATTGCTGGTATTTCGTCTATTTTAGGGAGAATCAACTTTATGACTACTATTATTTGCTCTCGTACTAAAATAGTGAGAATAGATCGTCTTCCTTTAATAATTTGATCCTTAGGGGTAACAGCATTCCTTTTAGTAACAACTTTA	0	213	0	101	82	40	226	64	133	141	294	84	72	104	81	33	38	35	29	0	733	0	533	358	167	814	269	648	474	892	191	194	333	259	145	147	72	120
OTU_742	Rotifera	Monogononta	Ploima	Synchaetidae	Polyarthra		95.38	Published	TCTGGCAGATGCTAAATATCATTCAGGTATTTCTGTTGATTTGGCGATTTTTAGTCTTCATTTAGCTGGTATTTCTTCTATTTTAGGTAGTATTAATTTTATAACTACTATTATTTGTTCTCGTACTACAAAATTGATTTCTATGGATCGTTTACCTTTGTTATTATGAGCAATTTCAGTTACAGCTGTATTGTTAATTACAAGATTA	0	0	0	3	10	3	2	7	10	1	1	2	3	2	0	5	5	1	7	0	0	0	0	0	18	3	14	36	0	8	2	0	0	6	20	16	4	16
OTU_743	Rotifera	Monogononta	Ploima				88.54	Published	TCTCTCAGATTCAAAATATCATTCAGGAGTTTCTGTTGACTTAGCTATTTTTAGACTTCATTTGGCAGGAATTTCTTCTATTTTAGGAAGAATCAATTTCTTAACTACTATTTTGTGCTCTCGTACTACTAAAATAATTTCACTCGACCGTTTACCCCTTTTTTTATGAGCTGTAGCTATTACAGCTATTCTTTTAATCACTAGACTG	0	0	0	0	0	0	0	13	0	0	0	0	0	0	0	0	0	0	0	0	0	0	0	0	0	0	11	0	0	0	0	0	22	0	0	0	0	0
OTU_744	Rotifera	Monogononta	Ploima	Synchaetidae	Polyarthra		97.4	Published	TCTGGCAGATGCTAAATATCATTCAGGTATTTCTGTTCATTTGGCGATTTTTAGTCTTCATTTAGCTGGAGTTTCTTCTATTTTAGGAAGAATTAATTTTTTAACTACTATTATTTGTTCTCGTACTACAAAATTTCTATGGATCGTTTACCTTTGTTATTATGAGCAATTTCAGTTACAGCTGTATTGTTAATTACAAGATTA	10	8	24	76	43	26	4	24	52	16	23	46	39	27	29	33	44	14	42	13	13	21	116	73	35	13	34	74	44	23	51	40	31	54	44	56	13	48
OTU_780	Rotifera	Monogononta	Ploima	Synchaetidae	Synchaeta		96.88	Published	TCTTTCAGATTCTAAATTTCATTCAGGAATTTCAGTAGATTTAGCTATTTTTAGTTTACATTTAGCTGGGATTTCTTCTATTATAGGAAGAAACTTTATAACTACTATTATCTGTTCTCGTACAACAAAAATAATTAGTATAGATCGTCTCCCTTTAATAATTTGAGCTTTAGGTGTAACAGCTTTTCTTTTAGTTACTACATTA	0	0	0	0	0	0	3	0	3	0	2	6	0	0	0	0	0	1	4	0	0	0	0	2	1	8	7	4	3	6	36	4	12	0	9	0	4	7
OTU_788	Rotifera	Monogononta	Ploima	Synchaetidae	Synchaeta		97.95	Published	ATTATCTGATTCTAAATTCCATTCTGGTATTTCTGTCGATCTTGCTATTTTTAGTTTACATATTGCTGGAATCTCTTCTATTTTAGGTAGTATTAATTTTATGACTACTATTATTTGTTCACGTACTACTAAAATAGTTAGAATAGATCGCCTCCCTTTAATAATTTGATCTTTAGGGGTAACTGCTTTTCTACTAGTAACAACTTTA	0	0	0	0	0	0	0	0	0	0	3	0	0	0	0	0	0	0	0	0	0	0	0	0	0	0	0	0	0	44	0	0	0	0	0	0	0	0
OTU_790	Rotifera	Monogononta	Ploima	Brachionidae	Keratella		97.4	Published	TCTCTCCGACTCTAAGTATCATTCTGGTATTTCAGTTGACTTAGCTATTTTCAGTCTTCATTTAGCAGGAATTTCTTCCATTCTTGGTAGTATTAATTTTCTTACTACTATCGTTTGCTCTCGCACAACTAAGGTTATTTCTCTTGATCGTATGCCTCTAATGCTTTGGGCTATCTCTGTTACTGCTATTCTTTTGATTAGGTTG	0	92	40	42	89	67	97	757	95	106	99	81	80	112	103	94	32	140	61	0	16	6	0	1	5	3	74	11	12	16	4	12	14	8	14	1	20	6
OTU_798	Rotifera	Monogononta	Ploima	Synchaetidae	Synchaeta		97.35	Published	ATTATCTGATTCTAAATTTCATTCTGGTATTTCTGTTGATTTAGCATTTTCAGTTTACATTTAGCTGGTATTTCTATTTTAGGTAGTATTAATTTTATAACTACTATTATTTGTTCTCGTACAACAAAGATAATTAGTATAGATCGTTTACCACTAATGTTATGATCATTAGGTGTTACTGCCTTTTTTATTACTAACTACTTTG	108	4	0	2	11	7	23	19	5	9	7	13	15	14	9	12	6	16	17	279	20	0	13	21	38	51	48	24	40	22	42	36	21	33	35	13	63	44
OTU_860	Rotifera	Monogononta	Ploima	Brachionidae	Keratella		95.83	Published	TCTCTCCGACTCTAAGTATCATTCTGGTATTTCAGTTGACTTAGCTATTTTCAGTCTTCATTTAGCAGGAATTTCTTCTCTTGGTAGGATTAATTTCCTTACTACTATCGTTTGCTCTCGCACAACTAAGGTTATTTCTCTTGATCGTATGCCTCTAATGCTTTGGGCTATCTCTGTTACTGCTATTCTTTTGATTACTAGGTTG	0	46	38	29	99	1223	136	70	500	77	87	59	86	96	83	81	23	115	48	0	15	7	3	0	107	7	12	52	18	7	5	10	12	2	15	2	13	4
OTU_878	Rotifera	Monogononta	Ploima	Brachionidae			94.27	Published	TCTCTCCGACTCTAAGTATCATTCTGGTATTTCAGTTGACTTAGCTATTTTCAGTCTTCATTTAGCAGGAATTTCTTCCATTCTTGGTAGGATTAATTTTCTTACTACTATCGTTTGCTCTCACACAAAGGTTATTTCTCTTGATCGTATGCCTCTAATGCTTTGGGCTATCTCTGTTACTGCTATTCTTTTGATTACTAGGTTG	0	84	55	56	8	117	134	101	174	161	108	107	126	194	142	161	52	199	100	0	34	9	1	1	11	7	18	13	9	6	10	23	20	14	13	3	28	13
OTU_902	Rotifera	Monogononta	Ploima	Synchaetidae	Synchaeta		97.4	Published	ATTATCTGATTCTAAATTTCATTCTGGTATTTCTGTTGATTTAGCTATTTTCAGTTTACATTTAGCTGGTATTTCTTCTATTTTAGGTAGTATTAATTTTATAACTACTATTTGTTCTCGTACAACAAAGATAATTAGTATAGATCGTTTACCACTAATGTTATGATCATTGGGTGTTACTGCCTTTTTATTACTAACTACTTTG	213	6	0	7	5	31	28	27	12	19	16	16	26	19	16	16	2	26	18	247	17	0	7	29	42	56	71	18	53	29	81	85	31	38	35	7	60	50
OTU_903	Rotifera	Monogononta	Ploima	Brachionidae	Keratella		97.34	Published	TCTCTCCGACTCTAAATATCATTCTGGTATTTCAGTTGACTTAGCTATTTTCAGTCTTCATTTAGCAGGAATTTCTTCCATTCTTGGTAGGATTTTCTTACTACTATCATTTGCTCTCGCACAACTAAGGTTATCTCTCTTGATCGTATGCCTCTAATGCTTTGAGCTATTTCTGTTACTGCTGTTCTTTTAATTACTAGGTTG	0	0	0	1776	431	2085	1911	4000	1838	442	2602	3318	449	610	1050	1573	1732	3322	1274	0	0	0	138	56	165	139	375	269	42	256	304	2	175	65	232	249	497	67
OTU_905	Rotifera	Monogononta	Ploima	Synchaetidae			94.15	Published	TCTATCTGACTCTAAGTTCCATTCTGGAATTTCTGTAGACCTTGCCATTTTTAGTCTACATCTTGCTGGAATTTCTTCTATTCTTGGTAGAATCAATTTTCTTTCTACAATTATTTGTTCTCGAACAACCAAGCTTGTTTCTCTAGACCGTCTTCCTCTGATGCTTTGAGCTATGGCTGTTACAGCAGTTCTGCTGGTTACTAGACTA	0	0	0	26	6	0	25	0	0	0	3	0	0	0	0	0	0	0	0	0	0	0	3	0	0	4	0	0	0	0	0	0	0	0	0	0	0	0
OTU_917	Rotifera	Monogononta	Ploima	Synchaetidae	Polyarthra		97.35	Published	TCTGGCAGATGCTAAATATCATTCAGGTATTTCTGTTGATTTGGCGATTTTTAGTCTTCATTTAGCTGGAGTTTCTTCTATTTTAGGAAGAATTAATTTTTTAACTACTATTATTTGTTCTCGTACTACAAAATTGATTTCTATGGATCGTTTACCTTTGTTATTATGAGCAGTTACAGCTGTATTGTTAATTACAAGATTA	54	37	83	265	208	77	36	117	196	98	84	139	119	102	92	91	159	54	123	26	31	86	321	273	106	49	122	243	110	87	200	108	76	102	113	153	71	141
OTU_927	Rotifera	Monogononta	Ploima	Synchaetidae	Polyarthra		97.98	Published	TCTTTCTGACTCTAAGTACCATTCAGGTATTTCAGTAGATTTAGCTATTTTTAGTCTTCATCTTGCTGGAGTTTCATCTATTCTGGGTAGAATTAATTTTCTTTCAACAATTATTTGTTCTCGAACAACTAAGATAATCTTGACCGTTTACCTTTATTCTTGTGATCTGTATCTATCACTGCTATTCTATTAATTACAAGATTA	0	0	0	86	0	1	105	0	0	0	133	15	382	10	472	53	53	0	215	0	1	0	174	0	0	164	1	0	0	278	0	4	66	1379	132	126	1	485
OTU_946	Rotifera	Monogononta	Ploima	Synchaetidae	Polyarthra		97.45	Published	TCTTTCTGACTCTAAGTACCATTCAGGTATTTCAGTAGATTTAGCTATTTTTAGTCTTCATCTTGCTGGAGTTTCATCTATTCTGGGTAGAATTAATTTCAACAATTATTTGCTCTCGAACAACTAAGATAATCTCTCTTGACCGTTTACCTTTATTCCTGTGATCTGTATCTATCACTGCTATTCTATTAATTACAAGATTA	40	251	25	408	355	245	989	242	136	195	229	230	732	699	985	863	1566	921	1093	90	563	52	512	378	477	1252	553	286	276	486	210	1004	1825	1592	1749	2604	1970	1818
OTU_984	Rotifera	Monogononta	Ploima	Brachionidae	Keratella		97.4	Published	TCTCTCCGACTCTAAGTATCATTCTGGCTCAGTTGACTTAGCTATTTTCAGTCTTCATTTAGCAGGAATTTCTTCCATTCTTGGTAGGATTAATTTTCTTACTACTATCGTTTGCTCTCGCACAACTAAGGTTATTTCTCTTGATCGTATGCCTCTAATGCTTTGGGCTATCTCTGTTACTGCTATTCTTTTGATTACTAGGTTG	0	2846	1998	1768	232	3814	4326	3210	5358	4918	3265	3987	3829	5864	4739	4420	1178	6996	3347	0	904	288	129	14	347	172	320	556	369	334	264	660	550	307	534	124	902	356
OTU_989	Rotifera	Monogononta	Ploima	Synchaetidae	Polyarthra		95.31	Published	TCTGGCAGATGCTAAATATCATTCAGGTATTTCTGTTGATTTAGCTATTTTTAGCTTACATTTAGCTGGTATTTCTTCTATTTTAGGAAGAATTAATTTTTTAACTACTATTATTTGTTCTCGTACTACAAAATTGATTTCTATGGATCGTTTACCTTTGTTATTATGAGCAATTTCAGTTACAGCTGTATTGTTAATTACAAGATTA	0	0	0	3	6	0	1	1	5	2	2	1	3	1	0	6	2	0	2	0	0	0	0	0	8	0	8	13	2	6	0	6	0	0	9	6	2	6
OTU_997	Rotifera	Monogononta	Ploima	Synchaetidae	Polyarthra		95.19	Published	TCTGTCTGATGCTAAGTATCATTCTGGTATTTCTGTTGATCTTATTTTCAGTCTTCATTTAGCTGGTGTCTCTTCTATTTTAGGTAGAATCAATTTTCTTACTACTATTGTGTGTTCTCGTACTACTAAGCTAATCTCTTTGGATCGTTTACCTTTATTACTATGGGCTATCTCTATTACTGCCATCTTACTTATTACAAGACTT	0	0	0	2	4	0	5	0	63	0	7	43	63	121	181	4	6	27	1	0	0	0	0	0	0	0	0	36	1	1	34	6	113	78	5	2	19	1
OTU_1024	Rotifera	Monogononta	Ploima	Brachionidae	Brachionus		96.3	Published	CCTTTCTGACTCTACCTATCATAGGGGTGTTTCTGTTGATCTTGCTATTTTTAGTTTACATCTTCTGTTTTCTTCAATTTTAGGTAGAATTAACTTTTTAACTACTATTATTTGTTCACGCACTACTAAAAGTATTTCTTTGGATCGTCTTCCTCTTATGTTATGAGCTCTTGCTGTTACGGCTATTCTTTTAATTACTAGACTA	0	0	0	1	3	19	8	17	20	17	15	11	10	15	8	3	11	6	7	0	4	0	16	8	74	41	48	54	52	49	25	88	26	32	23	11	41	27
OTU_1040	Rotifera	Monogononta	Ploima	Synchaetidae			92.31	Published	ATTATCTGATTCTAAATTTCATTCTGGTATTTCTGTTGATTTAGCTATTTTCAGTTTACATTTAGCTGGTATTTCTTCTATTTTAGGTAGTATTAATTTTATAACTACTATTATTTGTTTTTGTATAATAAAGATAATTAGTATAGATCGTTTACCACTAATGTTATGATCATTAGGTGTTACTGCCTTTTTTATTACTAACTACTTTG	15	0	0	0	2	2	3	3	0	5	0	1	5	0	1	1	0	3	1	43	2	0	1	6	8	3	7	4	6	3	10	4	4	4	7	0	7	5
OTU_1050	Rotifera	Monogononta	Ploima	Brachionidae	Brachionus		95.21	Published	CCTTTCTGACTCTACCTATCATAGAGGTGTGTTGATCTTGCTATTTTTAGTTTACATCTTTCTGGTGTTTCTTCAATTTTAGGTAGAATCAATTTTTTAACTACTATTATTTGTTCACGTACTACTAAAAGTATTTCTTTGGATCGTCTTCCTCTTATGTTATGATCTCCTGCTGTTACGGCTATTCTTTTAATTACTAGATTA	0	0	0	8	12	69	8	44	52	19	24	24	31	25	20	9	13	30	16	0	0	0	25	23	135	7	111	114	49	67	36	88	31	71	34	52	86	17
OTU_1057	Rotifera	Monogononta	Ploima	Trichocercidae			94.79	Published	CCTGTCAGATTCAAAGTACCACAGAGGTATCTCAGTTGACCTTGCAATTTTTAGGCTTCACATTGCCGGTGTTTCTTCTATTCTTGGTAGAATTAACTTCCTTACAACTATTATCTGTTCTCGTACAACTAAAATAATCTCTTTAGACCGTATGCCGTTAATACTTTGAGCGTTAGCTGTTACAGCTATTCTTCTGATTACAAGACTT	0	5	6	6	3	7	3	12	3	11	4	13	1	8	8	9	3	23	6	0	7	8	7	0	8	2	14	12	5	2	2	2	9	5	9	3	14	8
OTU_1058	Rotifera	Monogononta	Ploima	Brachionidae	Brachionus		95.9	Published	CCTTTCTGACTCTACCTATCATAGAGGTGTTTCTGTTGATCTTGCTATTTTTAGTTTACATCTTTCTGGTGTTTCTTCAATTTTAGGTAGAATTAACTTTTTAACTACTATTATTTGTTCACGCACTACTAAAAGTATTTCTTTGGATCGTCTTCCTCTTATGTTATGAGCTCTTGCTGTTACTGCTGTTCTTTTAATTACTAGGTTG	0	2	8	19	11	33	26	40	29	12	38	29	15	10	11	5	14	25	7	0	23	4	33	7	71	26	64	62	19	47	12	17	14	45	20	25	68	19
OTU_1076	Rotifera	Monogononta	Ploima	Synchaetidae	Polyarthra		96.39	Published	TCTGGCAGATGCTAAATATCATTCATATCATTTCTGTTGATTTGGCGATTTTTAGTCTTCATTTAGGGGAGTTTCTTCTATTTTAGGAAGAATTAATTTTTTAACTACTATTATTTGTTCTCGTACTACAAAATTGATTTCTATGGATCGTTTACCTTTGTTATTATGAGCAATTTCAGTTACAGCTGTATTGTTAATTACAAGATTA	3	7	5	40	31	16	2	18	27	11	8	11	19	9	10	14	18	8	16	11	8	14	69	47	21	5	18	32	16	16	25	16	9	20	20	26	12	17
OTU_1083	Rotifera	Monogononta	Ploima	Lecanidae			93.85	Published	TCTTTCTGATGCTAAGTTTCATTCTGGTATTTCTGTAGATTTAGCTATTTTTAGGTTACATTTAGCTGGTGTTTCTTCTATTTTAGGTAGAATTAATTTTTTAACAACTATTATTTGTTCTCGAACAACTAAAATGGTTTCTATGGATCGTTTACCTTTGATAATTTGAGCTTTAGCTGTTACAGCAATCTTGCTAGTTACAAGACTA	0	0	0	0	0	0	0	0	0	0	0	0	0	0	0	0	0	20	0	0	0	0	0	0	0	0	0	0	0	0	0	0	0	0	0	0	12	0
OTU_1105	Rotifera	Monogononta	Ploima	Synchaetidae	Synchaeta		97.89	Published	ATTATCTGATTCTAAATTTCATTCTGGTATTTCTGTTGATTTAGCTATTTTCAGTTTACATTTAGCTGGTATTTCTTCTATTTTAGGTAGTATTAATAACTACTATTATTTGTTCTCGTACAACAAAGATAATTAGTATAGATCGTTTACCACTAATGTTATGATCATTAGGTGTTACTGCCTTTTTATTACTAACTACTTTG	7274	214	0	234	500	647	894	1053	425	667	503	727	560	593	505	578	156	976	797	10864	837	3	393	1436	1295	1617	2076	751	1485	731	2740	1377	928	1043	1252	284	2063	1563
OTU_1114	Rotifera	Monogononta	Ploima	Brachionidae			94.61	Published	TCTCTCCGACTCTAAGTATCATTCTGGTATTTCAGTTGACTTGGCTATTTTCAATCTTCATTTAGCAGGAATTTCTTCCATTCTTGGTAGGATTAATTCTCTTACTACTATCATTTGCTCTCGCACAACTAAGGTTATTCCTCTTGATCGTATGCCTCTAATGCTTTGGGCTATCTCTGTTACTGCTATTCTTTTGATTACTAGGTTG	0	17	0	10	4	164	89	85	166	45	118	120	46	74	76	142	13	193	95	0	5	0	0	0	2	0	2	4	0	3	1	6	1	0	6	0	12	4
OTU_1152	Rotifera	Monogononta	Ploima	Lecanidae	Lecane		97.95	Private	TCTTTCTGATTCTAAATTTCACACTGGGATTTCTGTAGATTTAGCTATTTTTAGGTTACATTTAGCTGGTATTTCTTCTATTTTAGGTAGAATTAATTTTTTAACTACAATTATTTGTTCTCGTACAACAAAAATAATTTCTATGGATCGTCTTCCTTTAATAATCTGATCATTAGCAGTAACTGCAGTTTTATTAGTTACTAGACTT	0	0	0	13	0	0	0	0	0	0	0	0	0	0	0	0	0	0	0	0	0	0	14	0	0	0	0	0	0	0	0	0	0	0	0	0	0	0
OTU_1195	Rotifera	Monogononta	Ploima	Synchaetidae	Synchaeta		95.38	Published	ATTATCTGATTCTAAATTTCACTCAGGTATTTCTGTTGATTTAGCTATTTTTAGCTTACATTTAGCTGGTATTTCTTCTATTTTAGGTAGTATTAATTTTATAACTACTATTATTTGTTCTCGTACAACAAAGATAATTAGTATAGATCGTTTACCACTAATGCTATGATCACTAGGTGTTACTGCCTCTTTATTACTAACTACTTTG	0	3	4	2	16	22	66	28	2	27	62	24	34	19	27	23	7	19	26	0	11	23	3	0	57	81	77	13	44	125	15	46	25	69	41	23	49	44
OTU_1232	Rotifera	Monogononta	Ploima	Synchaetidae			91.24	Published	ATTATCTGATTCTAAATTTCATTCAGGTATTTCTGTTGATTTAGCTATTTTTAGCTTACATTTAGCTGGTATTTCTTCTATTTTAGGTAGTATTAATTTTATGACTACTATTATTTGTTTTTGTATAATTAAAATAATTAGTATAGATCGTTTACCTTTAATATTATGATCGTTAGGTGTAACAGCTTTTCTTTATTAACTACTTTA	0	0	0	0	0	0	0	0	0	0	0	0	0	0	0	0	0	0	0	0	6	0	0	1	3	0	1	0	3	0	3	0	5	2	0	0	0	0
OTU_1241	Rotifera	Monogononta	Ploima	Synchaetidae	Synchaeta		96.41	Published	ATTATCTGATTCTAAATTTCACTCAGGTATTTCTGTTGATTTAGCTATTTTTTAGCTTACATTTAGCTGGTATTTCTTCTATTTTAGGTAGTATTAATTTTATAACTACTATTATTTGTTCCCGTACAACAAAAATAATTAGTATAGATCGTTTACCTTTAATATTATGATCGTTAGGTGTAACAGCTTTTCTTTTATTAACTACTTTA	0	33	29	5	47	57	93	46	8	43	112	19	28	8	28	29	14	13	24	0	139	142	15	18	143	150	120	52	103	240	30	31	42	55	64	37	32	43
OTU_1297	Rotifera	Monogononta	Ploima	Brachionidae	Brachionus		95.79	Published	CCTTTCTGACCCTACCTATCATAGGGGTGTTTCTGTTGATCTTGCTATTTTTAGTTTACATCTTTCTGGTGTTTCTTCAATTTTAGGTAGAATTAACTTTTTTAACTACTATTATTTGTTCACGCACTACTAAAAGTATTTCTTTGGATCGTCTTCCTTATGTTATGAGCTCTTGCTGTTACGGCTATTCTTTTAATTACTAGACTA	0	0	0	0	0	15	5	1	3	3	11	6	3	5	5	3	1	2	1	0	0	0	5	2	20	11	11	12	16	16	9	17	9	3	5	11	6	7
OTU_1347	Rotifera	Monogononta	Ploima	Synchaetidae			93.94	Published	TCTGGCAGATGCTAAAATATCATCAGGTATTTCTGTTGATTTGGCGATTTTTAGTCTTCATCTAGCTGGAGTTTCTTCTATTTTAGGAAGAATTAATTTTTTAACTACTATTATTTGTTCTCGTACTACAAAATTGATTTCTATGGATCGTTTACCTTTATTATTATGAGCAATTTCAGTTACAGCTGTATTGTTAATTACAAGATTA	46	0	0	9	5	2	8	10	15	1	28	6	27	0	0	14	3	5	10	61	0	0	19	5	10	12	12	27	2	29	21	59	0	7	24	8	8	14
OTU_1348	Rotifera	Monogononta	Ploima	Brachionidae	Brachionus		96.81	Published	CCTTTCTGACTCTACCTATCATAGGGGTGTTTCTGTTGATCTTGCTATTTTTAGTTTACATCTTTCTGGTGTTTCTTCAATTTTAGGTAGAATTAACTTTTTAACTACTATTTTTCACGCACTACTAAAAGTATTTCTTTGGATCGTCTTCCTCTTATGTTATGAGCTCTTGCTGTTACGGCTATTCTTTTAATTACTAGACTA	0	4	0	5	2	34	22	12	30	33	30	16	15	20	15	12	11	11	15	0	4	0	10	11	56	26	40	36	43	61	17	56	25	40	18	16	24	22
OTU_1349	Rotifera	Monogononta	Ploima	Synchaetidae			91.67	Published	TCTGTCTGATGCTAAGTATCATTCTGGTATTTCTGTTGATCTTGCTATTTTCAGTCTTCATTTAGCTGGTGTCTCTTCTATTTTAGGTAGAATCAATTTTCTTACTACTATTGTGTGTTCTCGTACTACTAAGCTAATCTCTTTGGATCGTTTACCTTTATTACCGGGGGCTATCTCTATTACTGCTATCTTACTCATTACAAGACTT	0	3	0	0	0	0	7	0	0	0	2	1	8	5	3	2	7	837	99	0	2	0	1	1	0	0	0	0	0	4	0	6	2	3	3	2	418	63
OTU_1361	Rotifera	Monogononta	Ploima	Brachionidae	Keratella		97.35	Published	TCTCTCCGACTCTAAATATCATTCTGGTATTTCAGTTGACTTAGCTATTTTCAGTCTTCATTTAGCAGGAATTTCTTCCATTCTTGGTAGGATTAATTTTCTTACTACTATCATTTGCTCTCGCACAACTAAGGTTATCTCTCTTGATCGTATGCCTCTAATGCTTTGAGCTATTTCTGTTACTGCTGTATTGTTAATTACAAGATTA	0	0	0	10	2	5	0	8	5	0	2	6	0	3	0	2	0	3	5	0	0	0	0	0	1	0	3	1	1	1	1	1	0	1	2	2	3	4
OTU_1390	Rotifera	Monogononta	Ploima	Synchaetidae	Polyarthra		95.45	Published	TCTCCTGACTCTAAGTACCTACCAGGTATTTCAGTAGATTTAGCTATTTTTAGTCTTCATCTTGCTGGAGTTTCATCTATTTTGGGTAGAATTAATTTTCTTTCAACAATTATTTGCTCTCGAACAACTAAGATAATCTCTCTTGACCGTTTACCTTTATTCCTGTGATCTGTATCTATCACTGCTATTCTATTAATTACAAGATTA	0	0	3	7	2	2	6	0	0	3	0	4	5	0	3	1	5	0	3	0	3	9	3	2	10	8	1	0	4	0	1	4	4	12	6	12	2	5
OTU_1391	Rotifera	Monogononta	Ploima	Synchaetidae	Polyarthra		97.85	Published	TCTGGCAGATGCTAAATATCATTCAGGTATTTCTGTTGATTTGGCTATTTTTAGTCATTTAGCTGGAGTTTCTTCTATTTTAGGGAGAATTAATTTTTTAACTACTATTTGTTCTCGTACTACAAAATTGATTTCTATGGATCGTTTACCTTTGTTATTATGAGCAATTTCAGTTACAGCTGTATTGTTAATTACAAGACTA	0	0	0	6	13	3	0	10	7	13	2	10	10	12	14	9	17	0	5	0	0	0	2	19	8	0	19	12	12	9	18	24	4	8	17	25	0	7
OTU_1414	Rotifera	Monogononta	Ploima	Synchaetidae	Synchaeta		96.41	Published	ATTATCTGATTCTAAATTTCATTCAGGTATTTCTGTTGATTTAGCTATTTTTAGCTTACATTTAGCTGGTATTTCTTCTATTTTAGGTAGTATTAATTTCATAACTACTATTATTTGTTCTCGTACTACAAAAATAATTAGTATAGATCGTTTACCTTTAATACTATGATCTTTAGGTGTTACTGCTTTCTTATTACTAACTACTTTG	0	8	31	1	2	29	38	20	12	2	16	21	14	5	10	4	4	11	21	0	20	83	8	4	100	69	62	44	14	29	15	12	29	28	13	8	35	53
OTU_1427	Rotifera	Monogononta	Ploima	Synchaetidae	Polyarthra		95.52	Published	CCTTTCTGACTCTACCTATCATAGAGGTGTTTCTGTTGATCTTGCTATTTTCAGTCTTCATTTAGCTGGTGTCTCTTCTATTTTAGGTAGAATCAATTTTCTTACTACTATTGTGTGTTCTCGTACTACTAAGCTAATCTCTTTGGATCGTTTACCTTTATTACTATGGGCTATCTCTATTACTGCTATCTTACTTATTACAAGACTT	0	0	0	0	1	2	4	0	1	3	0	4	6	1	4	1	3	5	3	0	0	0	0	0	1	1	0	0	0	0	0	3	4	3	1	1	6	1
OTU_1430	Rotifera	Monogononta	Ploima	Synchaetidae	Polyarthra		95.83	Published	TCTGGCTGACGCTAAGTATCATTCTGGTATTTCTGTTGATCTTGCTATTTTCAGTCTTCATTTAGCTGGTGTCTCTTCTATTTTAGGTAAAATCAATTTTCTTACTACTATTGTGTGTTCTCGTACTACTAAGCTAATCTCTTTAGATCGTTTACCTTTATTATTATGAGCTATCTCTATTACTGCTATCTTACTTATTACAAGACTT	0	0	0	0	8	5	25	5	43	123	0	7	41	40	10	8	21	10	60	0	1	0	0	0	0	7	0	16	30	0	0	27	3	1	4	9	2	51
OTU_1449	Rotifera	Monogononta	Ploima	Brachionidae			90.1	Published	GCTATCGAGCGCAACCGCACATTCTGGAGGTTCTGTAGATTTAGCTATTTTCAGTCTTCATTTAGCAGGAATTTCTTCCATTCTTGGTAGGATTAATTTTCTTACTACTATCGTTTGCTCTCGCACAACTAAGGTTATCTCTCTTGATCGTATGCCTCTAATGCTTTGGGCTATTTCTGTTACTGCTGTTCTTTTAATTACTAGGTTG	0	3	0	1	1	8	4	10	5	5	7	10	3	7	5	5	7	7	7	0	0	0	0	0	0	0	0	1	0	1	0	1	0	1	1	0	1	1
OTU_1463	Rotifera	Monogononta	Ploima	Synchaetidae			94.87	Published	TCTCTCCGACTCTAAGTATCATTCAGGTATTTCTGTTGATTTGGCTATTTTTAGTCTTCATTTAGCTGGAGTTTCTTCTATTTTAGGGAGAATTAATTTTTTAACTACTATTATTTGTTCTCGTACTACAAAATTGATTTCTATGGATCGTTTACCTTTGTTATTATGAGCAATTTCAGTTACAGCTGTATTGTTAATTACAAGACTA	0	0	0	40	95	50	12	59	54	61	35	49	58	61	40	96	121	23	44	2	0	0	21	25	47	9	35	36	33	30	13	56	17	40	74	85	19	32
OTU_1482	Rotifera	Monogononta	Ploima	Synchaetidae	Polyarthra		96.45	Published	TCTTTCTGACTCTAAGTACCATTCAGGTATTTCAGTAGATTTAGCTATTTTTAGTCTTCCTTGCTGGAGTTTCATCTATTTTGGGTAGAATTAATTTTCTTTCAACAATTATTTGCTCTCGAACAACTAAGATAATCTCTCTTGACCGTTTACCTTTATTCCTGTGATCTGTATCTATCACTGCTTCTATTAATTACAAGATTA	0	0	7	5	3	2	5	0	2	3	0	1	14	5	11	8	14	7	8	0	3	33	7	2	4	18	3	8	3	1	6	13	23	32	14	29	11	19
OTU_1492	Rotifera	Monogononta	Ploima	Synchaetidae	Polyarthra		96.47	Published	TCTGTCAGATTCAAAGTTCCACTCAGGGATCTCTGTAGATTTAGCCATCTTCAGGCTTCATTTGGCTGGGGTTTCTTCAATTTTAGGGAGAATTAACTTTCTAACTACTATTATTTGCTCACGTACTACTAAATTAGTGTCTTTAGACCGTCTTCCTCTTATACTTTGGGCTCTGTCCGTCACTGCTGTTCTGCTAGTAACTAGACTT	0	0	0	3	0	1	0	0	0	0	1	0	0	2	0	0	6	0	1	0	0	0	0	0	0	0	0	0	0	0	0	0	0	0	0	1	0	0
OTU_1506	Rotifera	Monogononta	Ploima	Synchaetidae	Polyarthra		96.52	Published	TCTCTCTGACTCTAAGTACCATTCAGGTATTTCAGTAGATTTAGCTATTTTTAGTCTTCATCTTGCTGGAGTTTCATCTATTTTGGGTAGAATTAATTTTCTTTCAACAATTATTTGCTCTCGAACAACTATAATCTCTCTTGACCGTTTACCTTTATTCCTGTGATCTGTATCTATCACTGCTATTCTATTAATTACAAGATTA	0	3	19	8	6	9	14	3	0	5	0	7	11	18	23	13	19	18	19	0	10	46	12	13	11	23	13	3	8	1	18	22	31	36	29	53	25	34
OTU_1513	Rotifera	Monogononta	Ploima	Brachionidae	Keratella		96.92	Published	CCTCTCTGATTCTAAGTACCATTCTGGTATTTCAGTTGACTTAGCTATTTTCAGTCTTCATTTAGCAGGAATTTCTTCCATTCTTGGTAGGATTAGTTTTCTTACTACTATCGTTTGCTCTCGCACAACTAAGGTTATCTCTCTTGATCGTATGCCTCTAATGCTTTGGGCTATTTCTGTTACTGCTGTTCTTTTAATTACTAGGTTG	0	8	0	29	5	100	45	47	42	40	20	59	51	63	44	71	27	72	37	0	0	0	0	0	3	2	0	2	2	0	0	3	9	1	5	2	7	5
OTU_1524	Rotifera	Monogononta	Ploima	Synchaetidae	Polyarthra		95.38	Published	TCTGGCAGATGCTAAATATCATTCAAATATTTCTGTTAATTTGGCGATTTTTAATCTTCATTTAGCTGGAGTTTCTTCTATTTTAGGAAGAATTAATTTTTTAACTACTATTATTTATTCTCGTACTACAAAATTGATTTCTATGGATCGTTTACCTTTGTTATTATGAGCAATTTCAGTTACAGCTGTATTGTTAATTACAAGATTA	0	0	0	0	0	0	0	0	0	0	0	0	0	0	0	0	0	0	0	0	0	0	0	2	0	0	0	0	0	0	9	0	0	0	0	0	0	1
OTU_1533	Rotifera	Monogononta	Ploima	Brachionidae			94.41	Published	TCTCTCCGACTCTAAATATCATTCTGGTATTTCAGTTGACTTAGCTATTTTCAGTCTTCATTTAGCAGGAATTTCTTCCATTCTTGGTAGGATTAATTCTCTTACTACTATCATTTGCTCTCGCACAACTAAGGTTATCTCTCTTGATCGTATGCCTCTAATGCTTTGAGCTATTTCTGTTACTGCTATTCTTTTGATTACTAGGTCG	0	0	0	16	4	27	38	56	49	3	37	48	17	15	30	40	14	61	31	0	0	0	0	0	0	1	0	0	0	3	0	0	0	2	1	4	2	0
OTU_1555	Rotifera	Monogononta	Ploima	Synchaetidae	Synchaeta		97.85	Published	ATTATCTGATTCTAAATTTCACTCAGGTATTTCTGTTGATTTAGCTATTTTTAGCTTACATTTAGCTGGTATTTCTTCTATTTTAGGTAGTATTAATTTTATAACTACTATTATTTGTTCTCGTACAACTAAAATAATTAGTATAGATCGTTTACCTTTAATATTATGATCATTAGGTGTAACAGCTTTTTACTAACTACTTTA	0	21	56	8	21	36	55	37	3	49	64	18	23	9	13	16	12	10	19	0	95	97	7	60	61	102	89	21	127	131	77	25	24	60	47	24	24	31
OTU_1607	Rotifera	Monogononta	Ploima				88.48	Published	TCTGGCAGATGCTAAATATTATTTAGGTATTTTTGTTGATTTGGTGATTTTTAGTTTTCATTTAGCTGGAGTTTCTTCTATTTTAGGAAGAATTAATTTTTTAACTACTATTATTTGTTCTCGTACTACAAAATTGATTTCTATGGATCGTTTACCTTTGTTATTATGAGCAATTTCAGTTACAGCTGTATTGTTAATTACAAGATTA	0	0	0	0	0	0	0	0	0	0	0	0	0	0	0	0	0	0	0	0	0	1	0	0	3	1	5	3	1	4	0	2	0	2	4	5	0	1
OTU_1608	Rotifera	Monogononta	Ploima	Synchaetidae	Polyarthra		96.39	Published	TCTGGCAGATGCTAAATATCATTCAGGTATTTCTGTTGATTTGGCGATTTTTAGTCTTCATCTAGCTGGAGTTTCTTCTATTTTAGGAAGAATTAATTTTTTAACTACTATTATTTGTTCTCGTACTACAAAATTGATTTCTATGGATCGTTTACCTTTATTATATGAGCAAATTTCAGTTACAGCTGTATTGTTAATTACAAGATTA	30	0	0	5	5	3	2	8	14	3	21	6	12	12	0	7	8	2	5	39	0	0	12	11	6	6	9	29	1	22	6	30	2	4	21	6	5	11
OTU_1622	Rotifera	Monogononta	Ploima	Synchaetidae	Polyarthra		95.59	Published	TTTATCTAGCGCTACAGCTCATTCAGGTATTTCTGTTGATTTGGCGATTTTTAGTCTTCATTTAGCTGGAGTTTCTTCTATTTTAGGAAGAATTAATTTTTTAACTACTATTATTTGTTCTCGTACTACAAAATTGATTTCTATAGATCGTTTACCTTTGTTATTATGAGCAATTTCAGTTACAGCTGTATTGTTAATTACAAGATTA	6	4	6	4	7	1	0	1	1	3	3	3	2	2	3	1	0	0	2	5	2	8	1	2	1	0	3	1	4	0	0	1	2	0	4	0	2	1
OTU_1624	Rotifera	Monogononta	Ploima	Brachionidae	Brachionus		95.7	Published	CCTTTCTGACTATCATAGAGGTGTTTCTGTTGATCTTGCTATTTTTAGTTTACATCTTTCTGGTGTTTCTTCAATTTTAGGTAGAATCAATTTTTTAACTACTATTATTTGTTCACGTACTACTAAAAGTATTTCTTTGGATCGTCTTCCTCTTATGTTATGATCTCTTGCTGTTACGGCTATTCTTTTAATTACTAGATTA	0	0	0	0	2	8	0	4	12	3	1	3	5	5	5	8	3	42	1	0	0	0	2	3	20	1	18	50	6	5	6	17	1	16	38	5	126	7
OTU_1638	Rotifera	Monogononta	Ploima				89.71	Published	TCTATCCGATTCTAAATTCCACAGAGGCATCTCTGTAGACTTAGCAATCTTTAGTCTTCATTTAGCTGGTATCTCTTCTATTTTAGGGAGAATCAACTTTTTGACAACTATTATTTGCTCACGTACTGCCAAGGCTATTTCTTTAGACCGAATGCCTCTTATGCTTTGAGCTCTTTCTATTACAGCCGTTCTTTTAATCACCAGTCTT	0	0	0	0	0	2	0	0	0	0	0	0	0	0	0	0	0	0	0	0	0	0	0	0	0	0	0	0	0	0	0	0	0	2	0	0	0	0
OTU_1657	Rotifera	Monogononta	Ploima	Synchaetidae	Synchaeta		96.92	Published	ATTATCTGATTCTAAATTTCATTCTGGTATTTCTGTTGATTTAGCTATTTTCAGTTTACATTTAGCTGGTATTTCTTCTATTTTAGGTAGTATTAACTTTATGACTACTATTATCTGTTCTCGTACAACAAAGATAATTAGTATAGATCGTTTACCATTAATGTTATGATCATTAGGTGTTACTGCCTTTTTATTACTAACTACTTTG	1	15	62	12	22	116	162	81	40	72	94	72	77	45	80	58	52	69	73	8	81	235	10	33	255	217	254	157	115	178	67	110	91	175	150	95	169	120
OTU_1723	Rotifera	Monogononta	Ploima	Synchaetidae	Synchaeta		96.37	Published	ATTATCTGATTCTAAATTTCATTCTGGTATTTCTGTTGATTTAGCTATTTTCAGTTTACATTTAGCTGGTATTTCTCTTATTTTAGGTAGCTAATTTTATAACTACTATTATTTGTTCTCGTACAACAAAGATAATTAGTATAGATCGTTTACCACTAATGTTATGATCATTAGGTGTTACTGCCTTTTTATTACTAACTACTTTG	7	0	0	0	0	1	0	3	0	0	0	0	0	1	0	2	1	1	3	14	3	0	4	0	1	7	3	3	3	3	5	4	1	2	1	0	5	3
OTU_1724	Rotifera	Monogononta	Ploima	Synchaetidae	Synchaeta		96.45	Published	ATTATCTGATTCTAAATTTCATTCTGGTATTTCTGTTGATTTAGCTATTTTCAGTTTACATTTAGCTGGTATTTCTTCTATTTTAGGTAGTATTTTTTTATAACTACTATTATTTGTTCTCGTACAACAAAGATAATTAGTATAGATCGTTTACCACTAATGTTATGATCATTAGGTGTTACTGCCTTTTTATTACTACTTACTTTG	46	0	0	1	2	2	2	3	1	3	3	3	2	3	1	5	0	2	2	28	5	0	2	5	5	11	7	2	4	2	12	4	5	6	3	0	11	8
OTU_1726	Rotifera	Monogononta	Ploima	Brachionidae	Keratella		97.95	Published	TTTATCAGATATTAAGTATCATTCTGGTATTTCAGTTGACTTAGCTATTTTCAGTCTTCATTTAGCAGGAATTTCTTCCATTCTTGGTAGGATTAATTTTCTTACTACTATCATTTGCTCTCGCACAACTAAGGTTATCTCTCTTGATCGTATGCCTCTAATGCTTTGGGCTATTTCTGTTACTGCTGTTCTTTTAATTACTAGGTTG	0	3	0	29	1	77	40	52	26	31	38	50	45	55	43	76	53	98	57	0	0	0	3	0	8	1	4	4	2	4	3	12	9	2	19	7	11	10
OTU_1727	Rotifera	Monogononta	Ploima	Synchaetidae	Polyarthra		97.86	Published	TCTGGCAGATGCTAAATATCATTCAGGTATTTCTGATGGCGATTTTTAGTCTTCATTTAGCTGGAGTTTCTTCTATTTTAGGAAGAATTAATTTTTTAACTACTATTATTTGTTCTCGTACTACAAAATTGATTTCTATGGATCGTTTACCTTTGTTATTATGAGCAATTTCAGTTACAGCTGTATTGTTAATTACAAGATTA	11	19	30	105	87	37	11	64	83	34	31	71	45	33	38	42	66	24	54	15	21	42	131	148	53	24	68	109	64	37	73	41	32	57	55	79	24	60
OTU_1767	Rotifera	Monogononta	Ploima				87.18	Published	TTTAGCTGATTCTAAATTCCATACGGGAATTTCAGTTGATTTAGCTATTTTTAGTTTGCATCTAGCTGGTATTTCATCTATTTTAGGCAGAATTAATTTTTTAACAACTATTATTTGTTCTCGTACTACAAAATTAATTTCTATAGATCGTTTACCTTTAATAGTATGAGCTATTATTGTAACAGCTATTTTATTAGTGACAAGTTTA	0	13	0	0	0	0	0	0	0	0	0	0	0	0	0	0	0	0	0	0	16	0	0	0	0	0	0	0	0	0	0	0	0	0	0	0	0	0
OTU_1785	Rotifera	Monogononta	Ploima	Synchaetidae	Polyarthra		95.38	Published	TCTGGCAGATGCTAAATATCATTCAGGTATTTCTGTTGATTTGGCGATTTTTAGTCTTCATTTAGCTGGAGTTTCTTCTATTTTAGGAAGAATTAATTTTTTAACTACTATTATTTGTTCTCGTACAACAAAGATAATTAGTATAGATCGTTTACCTTTGTTATTATGAGCAATTTCAGTTACAGCTGTATTGTTAATTACAAGATTA	0	0	0	0	0	0	0	0	0	1	0	0	1	0	0	2	2	0	2	0	0	0	0	0	1	0	0	3	0	0	0	0	0	0	3	1	0	3
OTU_1800	Rotifera	Monogononta	Ploima	Synchaetidae	Synchaeta		97.41	Published	ATTATCTGATTCTAAATTTCATTCTGGTATTTCTGTTGATTTAGCTATTTTCAGTTTACATTTAGCTGGTATTTCTTCTATTTTAGGTAGTATTAATTTTATAACTACTATTATTTGTTCTCGTACAACAAAGATAATTAGTAGATCGTTTACCACTAATGTTATGATCATTAGCTGTTACTGCCTTTTTATTACTAACTACTTTA	53	2	0	2	2	1	7	6	2	4	7	6	3	6	7	3	0	5	7	97	9	0	5	13	11	18	24	12	16	7	27	9	8	7	11	4	28	22
OTU_1821	Rotifera	Monogononta	Ploima	Synchaetidae	Polyarthra		95.88	Published	TCTGGCAGATGCTAAATATCATTCAGGTATTTCCCTGATTTGGCGATTTTTAGTCTCCATTTAGCTGGAGTTTCTTCTATTTTAGGAAGAATTAATTTTTTAACTACTATTATTTGTTCTCGTACTACAAAATTGATTTCTATGGATCGTTTACCTTTGTTATTATGAGCAATTCCAGTTACAGCTGTATTGTTAATTACAAGATTA	0	2	2	23	11	2	1	7	10	9	4	7	5	3	5	11	9	3	6	0	1	4	14	10	7	0	10	9	8	7	25	5	5	6	3	8	1	5
OTU_1843	Rotifera	Monogononta	Ploima	Synchaetidae	Polyarthra		97.97	Published	TCTTTCTGACTCTAAGTACCATTCAGGTATTTCAGTAGATTTAGCTATTTTTAGTCTTCATCTTGCTGGAGTTTCATCTATTCTCGGTAGAATTAATTTTCTTTCAACAATTATTTGCTCTCGAACAACTATAATCTCCCTTACCGTTTTACCTTTATTCCTGTGATCTGTATCTATCACTGCTATTCTATTAATCACAAGATTA	0	0	0	0	0	0	0	0	0	0	0	0	0	0	0	0	0	0	0	0	0	0	0	0	0	0	0	0	0	0	0	0	0	0	0	0	0	3
OTU_1880	Rotifera	Monogononta	Ploima	Synchaetidae			93.65	Published	ATTATCTGATTCTAAATTCATTCTGGTATTTCTGTTGATTTAGCTTTTCAGTTTACATTTAGCTGGTATTTCTTCTATTTTAGGTAGTATTAATTTATAACTACTATTATTTGTTCTCGTACAACAAAGATAATTAGTATAGATCGTTTACCACTAATGTTATGATCATTAGGTGTTACTGCCTTTTTATTACTAACTACTTTG	33	0	0	0	4	5	9	8	3	1	2	7	5	5	4	2	1	9	10	40	3	3	2	3	18	27	33	15	14	6	17	8	8	8	5	4	19	16
OTU_1881	Rotifera	Monogononta	Ploima	Brachionidae			93.75	Published	TTTCTGACTCTACCTATCATAGAGGTGTTTCTGTTGATCTTGCTATTTTTAGTTTACATCTTTCTGGTGTTTCTTCAATTTTAGGTAGAATCAATTTTTTAACTACTATTATTTGTTCACGTACTACTAAAAGTATTTCTTTGGATCGTCTTCCTCTTATGTTATGATCTCTTGCTGTTACGGCTGTATTGTTAATTACAAGACTA	0	0	0	2	2	3	3	5	10	3	3	1	8	3	3	0	3	7	2	0	0	0	0	3	28	3	12	18	2	8	9	24	7	14	5	11	7	5
OTU_1884	Rotifera	Monogononta	Ploima	Brachionidae	Brachionus		95.65	Published	TTTCTGATTCTACCTATCATAGAGGTGTTTCTGTTGATCTTGCTATTTTTAGTTTACATCTTTCTGGTGTTTCTTCAATTTTAGGTAGAATCAATTTTTTAACTACTATTATTTGTTCACGTACTACTAAAAGTATTTCTTTGGATCGTCTTCCTCTTATTATGATCTCTTGCTGTTACGGCTATTCTAAATTACTAGATTA	0	0	0	0	0	0	0	0	3	0	0	0	0	0	0	4	0	15	0	0	0	0	0	0	0	0	1	13	0	0	0	0	0	0	13	0	47	0
OTU_1885	Rotifera	Monogononta	Ploima	Brachionidae	Keratella		96.41	Published	TCTTTCCGACTCTAAATATCATTCTGGTATTTCAGTTGACTTAGCTATTTTCAGTCTTCATTTAGCAGGAATTTCTTCCATTCTTGGTAGGATTAATTTTCTTACTACTATCATTTGCTCTCGCACAACTAAGGTTATTTCTCTTGATCGTATGCCTCTAACGCTTTGGGCTATCTCTGTTACTGCTATTCTTTTGATTACTAGGTTG	0	0	0	46	13	93	119	168	134	27	91	118	75	57	137	150	43	285	111	0	0	0	0	0	6	2	5	5	3	4	0	3	6	2	5	3	14	4
OTU_1886	Rotifera	Monogononta	Ploima	Synchaetidae	Synchaeta		97.41	Published	ATTATCTGATTCTAAATTTCATTCTGGTATTTCTGTTGGTTTAGCTATTTTTAGTTTACACTTAGCTGGTATTTCTTCTATTTTAGGTAGTATTAATTTTATAACTACTTATTTGTTCCCGTACAACAAAGATAATTAGTATAGATCGTTTACCACTAATGTTATGATCATTAGGTGTTACTGCCTTTTTACTACTAACTACTTTA	0	0	0	0	0	18	43	0	7	1	5	0	0	0	11	9	0	0	11	0	0	0	0	0	34	74	0	39	0	10	0	0	73	0	35	0	0	45
OTU_1898	Rotifera	Monogononta	Ploima	Synchaetidae	Polyarthra		97.44	Published	TCTAGCAGATGCTAAATATCATTCAGGTATTTCTGTTGATTTAGCGATTTTTAGTCTTCACTTGGCTGGAGTTTCTTCTATTTTAGGAAGAATTAATTTTTTGACTACTATCATTTGTTCTCGTACTACAAAATTGATTTCTATGGATCGTTTACCATTATTACTATGAGCAATTTCAGTTACTGCTGTGTTGTTAATCACAAGACTA	0	0	0	0	0	0	0	7	0	0	0	1	0	0	0	0	0	0	25	0	0	0	0	0	0	0	7	0	0	0	0	0	0	0	0	0	0	25
OTU_1899	Rotifera	Monogononta	Ploima	Synchaetidae	Polyarthra		95.24	Published	TCTTTCTGACTCTAAGTACCATTCAGGTATTTCAGTAAATTTAGCTATTTTTAGTCTTCATCTTGCTGGAGTTTCATCTATTCTGGGTAGAATTAATTTTCTTTCAACAATTATTTGCTCTCGAACAACTAAGATAATCTCTCTCACCGTTTTACCTTTATTCCTGTGATCTGTATCTATTACTGCCATTCTATTAATTACAAGATTA	0	0	0	2	0	0	0	0	0	0	0	0	0	0	0	0	0	0	3	0	0	0	0	0	0	0	0	0	0	0	0	6	4	0	1	0	4	3
OTU_1979	Rotifera	Monogononta	Ploima	Brachionidae	Brachionus		95.05	Published	CCTTTCTGACTCTACCTATCATAGGGGTGTTTCTGTTGATCTTGCTTTTTAGTTTACATCTTTCTGGTGTTTCTTCAATTTTAGGTAGAATTAACTTTTTAACTACTATTATTTGTTCACGCACTACTAAAAGTATTTCTTTGGATCGTCTTCCTCTTATGTTATGAGCTCTTGCTGTTACGGCTCTTTTAATTACTAGACTA	0	0	0	2	0	8	5	3	6	14	8	4	4	10	14	1	3	4	5	0	0	0	2	1	23	13	12	16	14	32	9	28	10	13	8	4	7	13
OTU_1980	Rotifera	Monogononta	Ploima	Brachionidae	Keratella		97.31	Published	TCTCTCTGACTCTAAATATCATTCTGGTATTTCAGTTGACTTATTTTCAGTCTTCATTTAGCAGGAATTTCTTCCATTCTTGGTAGGATTAATTTTCTTACTACTATCATTTGCTCTCGCACAACTAAGGTTATCTCTCTTGATCGTATGCCTCTAATGCTTTGAGCTATTTCTGTTACTGCTGTTCTTTTAATTACTAGGTTG	0	0	0	2	211	4	83	374	0	0	3	2	0	0	546	1	2	826	381	0	0	0	0	41	1	12	61	1	0	0	0	0	38	89	0	1	88	46
OTU_1989	Rotifera	Monogononta	Ploima				87.65	Private	TCTTTCTGATTCTAAGTACCACAGGGGTGTTTCTGTAGATCTTGCAATTTTCAGTCTCCATCTTGCTGGTGTTTCTTCCATTCTAGGAAGTATCAACTTCTTGACTACCGTTATCTGTTCTCGTACAAGTAAAGTGGTTTCTATGGATCGTCTTCCGCTGTTTTTATGGGCTACTAGTCTTACTGCTATTCTTCTCATTACTAGGTTG	0	0	0	0	0	0	0	0	0	0	0	0	0	0	0	5	0	0	0	0	0	0	0	0	0	0	0	0	0	0	0	0	0	0	0	0	0	0
OTU_1998	Rotifera	Monogononta	Ploima	Synchaetidae	Polyarthra		96.48	Published	TCTAGCAGATTAAATATCATTCAGGTATTTCTGTTGATTTGGCGATTTTTAGTCTTCATTTAGCTGGAGTTTCTTCTATTTTAGGAAGAATTAATTTTTTAACTACTATTATTTGTTCTCGTACTACAAAATTGATTTTTATAGATTGTTTATTTTTGTTATTATGAGCAATTTCAGTTACAGCTGTATTGTTAATTATAAGATTA	0	0	0	0	0	0	0	0	0	0	0	0	0	0	0	0	0	0	0	0	0	0	0	0	0	0	0	1	0	0	0	4	0	2	0	0	0	0
OTU_2048	Rotifera	Monogononta	Ploima	Synchaetidae	Polyarthra		97.85	Published	TCTGGCAGATGCTAAATATCATTCAGGTATTTCTGTTGATTTGGCAGTCTTCATTTAGCTGGAGTTTCTTCTATTTTAGGAAGAATTAATTTTTTAACTACTATTATTTGTTCTCGTACTACAAAATTGATTTCTATGGATCGTTTACCTTTGTTATTATGAGCAATTTCAGTTACAGCTGTATTGTTAATTACAAGATTA	0	0	0	0	0	0	0	0	0	0	0	0	0	0	0	0	0	0	0	0	0	0	0	0	0	0	3	3	2	2	0	0	3	0	2	1	0	4
OTU_2073	Rotifera	Monogononta	Ploima	Brachionidae	Brachionus		97.35	Published	CCTTTCTGACTCTACCTATCATAGGGGTGTTTCTGTTGATCTTGCTATTTTTAGTTTACATCTTTCTGGTGTTTCTTCAATTTTAGGTAGAATTAACTTTTTAACTACTATTATTTGTTCACGCACTACTAAAAGTATTTCTTTGGATCGTCTTCCTCTTATGTTATGAGCTCTTGCTGTTACGGCTATTCTTTTAATTATTGTTATCGTTA	0	76	0	83	161	1179	610	878	870	1182	1052	658	646	664	440	344	419	250	392	0	122	0	193	203	2098	767	1430	1551	1423	2260	536	2448	949	785	997	683	643	846
OTU_2074	Rotifera	Monogononta	Ploima	Synchaetidae	Synchaeta		96.88	Published	ATTATCTGATTCTAAATTTCACTCAGGTATTTCTGTTGATTTAGCTATTTTTAGCTTACATTTAGCTGGTATTTCTTCTATTTTAGGTAGTATTAATTTTATAACTACTATTATTTGTTCTCGTACGAAAATAATTAGTATAGATCGTTTACCTTTAATATTATGATCATTAGGTGTAACAGCTTTTCTTTTACTAACTACTTTA	0	9	32	3	8	10	12	16	3	18	26	13	6	10	4	4	8	4	6	0	32	25	1	28	17	40	25	2	39	53	54	5	8	28	11	7	5	20
OTU_2189	Rotifera	Monogononta	Ploima	Lecanidae			91.67	Published	TCTTTCTGATGCTAAATTTCATTCTGGTATTTCTGTAGATTTGGCTATTTTTAGATTACACTTAGCTGGTGTTTCTTCTATTTTGGGTAGAATTAATTTTTTAACAACTATTATTTGTTCTCGAACAACTAAGATGGTTTCTATGGATCGTTTGCCATTAATGATTTGGGCTTTAGCAGTTACAGCAATTTTACTAGTTACAAGGTTA	0	0	0	0	0	0	0	0	3	0	0	0	0	0	0	0	0	0	0	0	0	0	0	0	0	0	0	0	0	0	0	0	0	0	0	0	0	0
OTU_2208	Rotifera	Monogononta	Ploima				88.36	Published	TCTATCTGATGCTAAGTCATTCTGGTATTTCTGTTGATCTTGCTATTTTCAGTCTTCATTTAGCTGGTGTCTCTTCTATTTTAGGTAGAATCAATTTTCTTACTACTTGTGTGTTCTCGTACTACTAAGCTAATCTCTTTGGATCGTTTACCTTTATTACTATGCGCTATCTCTATTACTGCTATCTTACTTATTACAAGACTT	0	0	0	0	0	0	0	0	0	0	0	0	0	0	0	0	0	0	0	0	0	0	0	0	0	0	0	0	0	0	0	0	0	0	2	0	2	0
OTU_2233	Rotifera	Monogononta	Ploima	Synchaetidae	Polyarthra		96.08	Published	TCTTTCAGATTCTAAATACCATTCAGGTATTTCTGTAGATTTAGCTATTTTTAGTCTACATTTAGCAGGTATTTCTTCTATTTTAGGTAGAATTAATTTTCTTACAACAATTATTTGTTCTCGTACTACTAAGCTGGTTTCCCTAGACCGCTTACCTCTTATGCTCTGAGCCATAGCAGTTACAGCTGTCCTACTTATTACAAGGCTT	0	0	0	0	0	0	0	0	0	1	0	0	0	0	0	0	0	0	0	0	0	0	0	0	0	0	0	0	3	0	0	0	0	0	0	0	0	0
OTU_2257	Rotifera	Monogononta	Ploima	Synchaetidae	Synchaeta		96.15	Published	ATTATCTGATTCTAAATTTCATTCAGGTATTTCTGTTGATTTAGCTTACATTTAGCTGGTATTTCTTCTATTTTAGGTAGTATTAACTTTATGACTACTATTATCTGTTCTCGTACAACTAAAATAATTAGTATAGATCGTTTACCTTTAATATTATGATCGTTAGGTGTAACAGCTTTTCTTTTATTAACTACTTTA	0	0	0	0	0	0	0	0	0	0	0	0	0	0	0	0	0	0	0	0	5	0	0	0	0	0	0	0	0	0	0	0	0	0	0	0	0	0
OTU_2273	Rotifera	Monogononta	Ploima	Synchaetidae			93.33	Published	ATTATCTGATTCTAAATTTCATTCAGGTATTTCTGTTGATTTGGCGATTTTTAGTCTTCATTTAGCTGGAGTTTCTTCTATTTTAGGAAGAATTAATTTTTTAACTACTATTATTTGTTCTCGTACAACAAAGATAATTAGTATAGATCGTTTACCACTAATGTTATGATCATTAGGTGTTACTGCCTTTTTATTACTAACTACTTTG	6	0	0	2	25	23	11	34	9	15	12	22	14	13	10	26	11	9	13	19	7	0	0	8	34	14	43	26	24	34	8	25	16	11	46	20	35	33
OTU_2299	Rotifera	Monogononta	Ploima	Synchaetidae			93.33	Published	ATTATCTGATTCTAAATTTCATTCAGGTATTTCTGTTGATTTAGCTATTTTTAGCTTACATTTAGCTGGTATTTCTTCTATTTTAGGTAGTATTAACTTTATGACTACTATTATCTGTTCTCGTACAACTAAAATAATTAGTATAGATCGTTTACCTTTTAATATTATATCGTTAGGTGTAACAGCTTTTCTTTTATTAACTACTTTA	0	0	0	0	0	0	0	0	0	0	0	0	0	0	0	0	0	0	0	0	4	0	0	1	2	6	0	1	10	4	5	0	0	4	0	0	1	1
OTU_2302	Rotifera	Monogononta	Ploima	Brachionidae	Keratella		97.16	Published	TCTCTCCGACTCTAAATATCATTCTGGTATTTCAGTTGACTTAGCTATTTTCAGTCTTCATTTAGCAGGAATTTCTTCCATTCTTGGTAGGATTAATTTTCTTACTACTATCATTTGCTCTCGCACAACTAAGGTTATCTCTCTTGATCGTATGCCTCTAATGCTTTGAGCTATTTCTGTTACTGCTGTTCTTTTATTAACTACTTTA	0	0	0	20	3	19	31	35	25	2	38	39	0	0	22	15	25	18	25	0	0	0	4	2	2	1	4	0	1	4	4	0	1	2	1	2	2	1
OTU_2303	Rotifera	Monogononta	Ploima	Synchaetidae	Synchaeta		95.31	Published	ATTCTGATTCTGAATTTAATTCAGGTATTTCTGTTGATTTAGCTATTTTTAGCTTACATTTAGCTGGTATTTCTTCTATTTTAGGTAGTATTAACTTTATGACTACTATTATTTGTTCTCGTACAACTAAAATAATTAGTATAGATCGTTTACCTTTAATATTATGATCATTAGGTGTAACAGCTTTTCTTTTACTAACTACTTTA	0	0	5	0	2	3	8	2	1	4	12	4	0	0	0	4	4	1	3	0	12	0	1	3	8	9	11	3	12	13	2	2	3	9	4	3	1	4
OTU_2306	Rotifera	Monogononta	Ploima	Synchaetidae	Synchaeta		95.38	Published	ATTATCTGATTCTAAATTTCATTCTGGTATTTCTGTTGATTTAGCTATTTTCAGTTTACATTTAGCTGGTATCTCTTCTATTTTAGGTAGTATTAATTTTATAACTACTATTATCTGTTCTCGTACAACTAAAATAATTAGTATAGATCGTTTACCTTTAATATTATGATCGTTAGGTGTAACAGCTTCTCTTTTATTAACTACTTTA	2	9	25	11	39	84	154	42	28	56	73	59	53	27	33	54	17	36	46	0	68	91	20	23	179	198	148	132	139	192	48	83	61	104	102	78	102	93
OTU_2346	Rotifera	Monogononta	Ploima	Synchaetidae	Synchaeta		97.86	Published	TCTGGCAGACGCTAAATTTCATTCTGGTATTTCTGTTGATTTAGCTATTTTCAGTTTACATTTAGCTGGTTTCTTCTATTTTAGGTAGTATTAATTTTATAACTACTATTATTTGTTCTCGTACAACAAAGATAATTAGTATAGATCGTTTACCACTAATGTTATGATCATTAGGTGTTACTGCCTTTTTATTACTAACTACTTTG	22	0	0	7	20	10	3	17	11	9	8	20	18	6	7	7	4	11	15	45	0	0	12	12	34	12	35	17	17	16	14	30	14	16	31	9	27	30
OTU_2380	Rotifera	Monogononta	Ploima	Synchaetidae			93.85	Published	TCTGGCAGATGCTAAATATCatttaggtatttttgttgatttggtgatttttagtttttatttaGCTGGAGTTTCTTCTATTTTAGGAAGAATTAATTTTTTAACTACTATTATTTGTTCTCGTACTACAAAATTGATTTTTATGGATCGTTTATTTTTGTTATTATGAGCAATTTCAGTTACAGCTGTATTGTTAATTACAAGATTA	0	0	0	0	0	0	0	0	0	0	0	0	0	0	0	0	0	0	0	0	0	0	0	0	0	0	0	1	0	0	0	0	0	0	0	0	0	0
OTU_2383	Rotifera	Monogononta	Ploima	Brachionidae	Keratella		97.88	Published	TCTCTCTGACTCTAAATATCATTCTGGTATTTCAGTTGACTTAGCTATTTTCAGTCTTCATTTAGCAGGAATTTCCTCCATTCTTGGTAGGATTAATTTTCTTACTACTATCATTTGCTCTCGCACAACTAAGGTTATCTCTCTTGATCGTATGCCTCTAATGCTTTGAGCTATTTCTGTTACTGCTGTCCTTTTGATTACTAGATTG	0	0	0	4	6	12	10	5	2	4	12	8	6	2	7	8	2	23	5	0	0	0	0	0	0	0	0	0	0	0	0	0	0	0	0	0	3	0
OTU_2432	Rotifera	Monogononta	Ploima	Synchaetidae			90.4	Published	CCTATCTGATTCTAAATTTCATTCTGGAATTTCTGTTGATCTTGCAATTTTTAGTTTACATATTGCTGGTATTTCATCAATCTTAGGTAGAAATTTTATAACTACTATTGTTTGTTCTCGTACTACAAAGATAGTAAGAATAGATCGTCTACCTTTAATAATTTGATCATTAGGAGTAACTGCTTTTCTTCTAGTGACTACTTTA	0	0	0	0	4	0	0	0	1	0	4	0	0	0	0	0	0	0	0	0	0	0	0	5	0	0	0	9	0	13	9	0	3	0	0	0	0	0
OTU_2434	Rotifera	Monogononta	Ploima				89.7	Published	TCTTTCTGACTCTAAGTACCATTCAGGTATTTCAGTAGATTTAGCTAGTCTTCATCTTGCTGGAGTTTCATCTATTCTGGGTAGAATTAATTTTCTTTCAACAATTATTTGCTCTCGAACAACTAAGATAATCTCTCTTGACCGTTTACCTTTATTCCTGTGATCTGTATCTATCACTGCTACTCTATTAATTACAAGATTA	0	0	0	0	4	9	33	3	28	16	0	7	0	25	63	10	73	32	29	0	0	0	0	7	26	62	11	67	28	0	3	4	69	116	29	109	84	60
OTU_2472	Rotifera	Monogononta	Ploima	Synchaetidae	Polyarthra		95.9	Published	TCTTTCTGACTCTAAGTACCATTCAGGTATTTCAGTAGATTTAGCTATTTTTAGTCTTCATCTTGCTGGAGTTTCATCTATTCTGGGTAGAATTAATTCTTTCAACAATTATTTGCTCTCGAACAACTAATCTCTCTTGACCGTTTACCTTTATTCCTGTGATCTGTATCTATCACTGCTATTCTATTAATCACAAGATTA	0	0	0	0	0	0	0	0	0	0	0	0	0	0	0	0	0	0	0	0	0	0	0	0	0	0	0	0	0	0	0	0	0	1	2	1	2	0
OTU_2473	Rotifera	Monogononta	Ploima	Brachionidae	Brachionus		95.83	Published	TTTCTGACTCTACCTATCATAGGGGTGTTTCTGTTGATCTTGCTATTTTTAGTTTACATCTTTCTGGTGTTCCTTCAATTTTAGGTAGAATTAACTTTTTAACTACTATTATTTGTTTACGCACTACTAAAAGTATTTCTTTGGATCGTCTTCCTCTTATGTTATGAGCTCTTGCTGTTACGGCTATCCTTTTAATTACTAGATTA	0	0	0	0	2	6	1	3	1	5	2	3	1	3	0	0	2	0	0	0	0	0	1	0	14	2	13	5	3	11	0	11	3	3	3	2	5	4
OTU_2477	Rotifera	Monogononta	Ploima	Synchaetidae	Polyarthra		96.86	Published	TCTAGCAGATGCTAAATATCATTCATTTCTGTTGATTTGGCGATTTTTAGTCTTCATTTAGCTGGAGTTTCTTCTATTTTAGGAAGAATTAATTTTTTAACTACCATTATTTGTTCTCGTACTACAAAATTGATTTCTATGGATCGTTTACCTTTGTTATTATGAGCAATTTCAGTTACAGCTGTATTGTTAATTACAAGACTA	0	0	0	4	15	6	0	5	8	14	3	5	5	5	6	9	9	4	12	1	0	0	3	11	1	3	2	4	19	7	0	12	6	3	14	9	4	1
OTU_2479	Rotifera	Monogononta	Ploima	Synchaetidae	Polyarthra		96.02	Published	TCTTTCTGATTCTAAATTTCATTCAGGTATTTCAGTAGATTTAGCTATTTTTAGTCTTCATCTTGCTGGAGTTTCATCTATTCTGGGTAGAATTAATTTTCTTTCAACAATTATTTGTTCTCGAACAACTAAGATAATCTCTCTTGACCGTTTACCTTTATTCTTGTGATCTGTATCTATCACTGCTATTCTATTAATTACAAGATTA	0	0	0	2	0	1	3	0	1	3	2	2	7	1	4	1	1	0	5	0	4	7	4	0	2	4	2	3	0	1	0	1	3	12	7	2	2	10
OTU_2604	Rotifera	Monogononta	Ploima	Synchaetidae			94.87	Published	ATTATCTGATTCTAAATTTCATTCAGGTATTTCTGTTGATTTAGCTATTTTTAGTTTACATTTAGCTGGGATTTCTTCTATTATAGGAAGAATTAACTTTATAACTACTATTATTTGTTCTCGTACAACAAAAATAATTAGTATAGATCGTCTTCCTTTAATAATTTGATCCTTAGGGGTAACAGCATTCCTTTTAGTAACAACTTTA	0	0	0	0	0	1	0	0	0	0	0	0	0	0	0	0	0	0	0	0	0	0	0	0	2	6	1	0	0	1	0	0	3	0	3	0	4	0
OTU_2616	Rotifera	Monogononta	Ploima	Synchaetidae	Synchaeta		95.38	Published	ATTATCTGATTCTAAATTTCATTCTGGAATTTCTGTTGATCTTGCAATTTTTAGTTTTTATATTGCTGGTATTTCGTCTATTTTAGGGAGAATTAATTTTATAACTATTATTATTTGTTCTCGTATTATTAAAATAGTGAGAATAGATCGTCTTCCTTTAATAATTTGATCCTTAGGGGTAACAGCATTCCTTTTAGTAACAACTTTA	0	0	0	0	0	0	0	0	0	0	0	0	0	0	0	0	0	0	0	0	0	0	0	0	1	0	0	0	0	0	0	0	0	0	0	0	0	0
OTU_2620	Rotifera	Monogononta	Ploima	Synchaetidae			93.68	Published	ATTATCTTCTAAATTTCATTCTGGAATTTCTGTTGATCTTGCAATTTTTAGTCTTCATTGCTGGTATTTCATCTATTTTAGGGAGAATTAACTTTATGACTACTATTATTTGTTCTCGTACTACTAAAATAGTGAGAATAGATCGTCTTCCTTTAATAATTTGATCCTTAGGGGTAACAGCATTCCTTTTAGTAACAACTTTA	0	5	4	5	1	1	3	3	3	1	1	4	0	2	2	0	0	2	2	0	11	7	14	6	8	22	10	13	9	10	7	4	7	6	4	2	12	5
OTU_2622	Rotifera	Monogononta	Ploima	Synchaetidae	Polyarthra		95.52	Published	TCTAGCAGATGCTAAATATCATTCAGGTATTTCTGTTGATTTGGCGATTTTTAGTTTACATTTAGCTGGGATTTCTTCTATTATAGGAAGAATTAACTTTATAACTACTATTATTTGTTCTCGTACTACAAAATTGATTTCTATGGATCGTTTACCTTTGTTATTATGAGCAATTTCAGTTACAGCTGTATTGTTAATTACAAGATTA	0	0	0	1	0	0	0	0	0	0	0	2	1	2	0	0	0	0	0	0	0	0	0	0	2	0	1	1	0	0	0	0	0	0	1	0	1	3
OTU_2676	Rotifera	Monogononta	Ploima	Brachionidae	Keratella		96.34	Published	TCTCTCCGACTCTAAGTATCATTCTGGTATTTCAGTTGACTTGGCTATTTTCAGTCCTCATTTAGCAGGAATTTCTTCCATTCTTGGTAGGATTAATTTTCTTACTACTATCGTTTGCTCTCGCACAACTGAGGTTATTTCTCTCGATCGTATGCCTCTAATGCTTTGGGCTATCTCTGTTACTGCTATTCTTTTGATTACTAGGTTG	0	6	0	0	0	29	14	13	24	8	31	18	14	14	7	12	1	46	18	0	0	0	0	0	0	0	1	3	1	0	0	0	1	0	0	0	0	1
OTU_2678	Rotifera	Monogononta	Ploima	Synchaetidae	Polyarthra		95.65	Published	TCTTTCTGACTCTAAGTACCATTCAGGTATTTCAGTAGACTTAGCTATTTTTAGTCTTCATCTCGCTGGAGTTTCATCTATTCTCGGTAGAATTAATTTTCTTTCAACAATTATTTGCTCTCGAACAACTAAGATAATCTCTCTTGACCGTTTATTCCTGTGATCTGTATCTATCACTGCTATTCTATTAATCACAAGATTA	3331	0	0	138	40	123	319	7	82	0	87	79	193	266	345	284	474	230	438	9423	0	0	138	22	309	359	13	196	0	157	65	141	953	564	725	816	510	926
OTU_2679	Rotifera	Monogononta	Ploima	Synchaetidae			92.82	Private	ATTATCTGATTCTAAATTTCATTCTGGTATTTCTGTTGATTTAGCTATTTTTAGTTTACATTTAGCTGGGATTTCTTCTATTATAGGAAGAATTAACTTTATAACTACTATTATTTGTTCTCGTACAACGAAAATAATTAGTATAGATCGTTTACCTTTAATATTATGATCGTTAGGTGTAACAGCTTTTCTTTTATTAACTACTTTA	0	0	0	0	0	0	3	1	0	0	0	0	0	0	0	4	0	0	0	0	0	0	0	0	3	6	0	0	0	7	0	4	0	0	4	0	4	2
OTU_2683	Rotifera	Monogononta	Ploima	Brachionidae	Brachionus		95.7	Published	CCTTTCTGACTCTACCTATCATAGAGGTGTTTCTGTTGATCTTGCTATTTTTAGTTTACATCTTTCTGGTTCAATTTTAGGTAGAATCAATTTTTTAACTACTATTATTTGTTCACGTACTACTAAAAGTATTTCTTTGGATCGTCTTCCTCTTATGTTATGATCTCTTGCTGTTACGGCTATTCTTTTAATTACTAGATTA	0	0	0	125	153	571	71	523	453	325	279	345	409	276	247	92	249	321	150	0	0	4	258	351	1424	122	1143	1369	605	620	449	972	268	903	285	597	1037	347
OTU_2727	Rotifera	Monogononta	Ploima				86.27	Published	TTTATCAGATTCTAAATTTCATACAGGTATTTCTGTTGATTTAGCTATTTTTAGACTTCATTTGGCTGGTATCTCTTCTATTTTAGGTAGTATTAATTTTCTTACTACTATTATCTGTTCACGTACTACTAAAATAATTTCTATAGACCGTCTACCACTTATGATTTGAGCTTTAGCAGTGACCGCAGTGTTGCTAGTTACTAGCCTT	0	0	0	0	0	0	0	0	0	0	0	0	0	0	0	0	3	0	0	0	0	0	0	0	0	0	0	0	0	0	0	0	0	0	0	1	0	0
OTU_2800	Rotifera	Monogononta	Ploima	Synchaetidae			91.01	Published	TCTGGCAGATGCTAAATATCATTCAGGTATTTCTGTTGATTTGGCGATTTTTAGTCTTCATTTAGCTGGGATTTCTTCTATTATAGGAAGAATTAACTTTATAACTACTATTATTCGTTCTCGTACAACAAAAATAATTAGTATAGATCGTTTACCTTTAATATTATGATCGTTAGGTGTAACAGCTTTTCTTTTATTAACTACTTTA	0	0	0	0	0	0	0	0	0	0	0	0	0	0	0	0	0	0	0	0	0	0	0	0	0	0	0	1	0	0	0	0	0	0	1	0	0	0
OTU_2862	Rotifera	Monogononta	Ploima				89.58	Published	TCTCTCTGATTCTAAATATCACACAGGTATTTCGGTTGACCTAGCTATTTTTAGTTTACACTTAGCTGGTATTTCTTCTATCTTAGGTAGAATCAATTTTTTAACAACTATTATTTGTTCTCGTACAACAAAAATAATCTCTATAGATCGCCTACCTTTAATGTTGTGGGCTATTTTTGTCACAGCAGTTTTATTAGTAACTTCTTTG	0	0	0	0	0	0	0	0	0	0	0	0	0	0	0	0	0	3	0	0	0	0	0	0	0	0	0	0	0	0	0	0	0	0	0	0	1	0
OTU_2885	Rotifera	Monogononta	Ploima	Synchaetidae			93.09	Published	GCTATCGAGCGCAACCGCACATTCTGGTATTTCTGTTGATCTTGCTATTTTCAGTCTTCATTTAGCTGGTGTCTCTTCTATTTTAGGTAGAATCAATTTTCTTACTACTATTGTGTGTTCTCGTACTACTAAGCTAATCTCTTTGGATCGTTTACCTTTATTACTATGGGCTATCTCTATTACTGCTATCTTACTTATTACAAGACTT	0	0	0	0	1	0	4	0	0	1	2	0	0	3	1	3	0	3	0	3	1	0	0	0	0	0	0	0	0	0	0	1	1	0	1	0	2	0
OTU_2895	Rotifera	Monogononta	Ploima	Synchaetidae			93.07	Published	TCTATCTGATGCTAAGTATCATTTTGGTATTTTTGTTGATTTTGTTATTTTTAGTCTTCATTTAGCTGGTGTCTCTTCTATTTTAGGTAGAATCAATTTTCTTACTACTATTGTGTGTTCTCGTACTACTAAGCTAATCTCTTTGGATCGTTTACCTTTATTACTATGGGCTATCTCTATTACTGCTATCTTACTTATTACAAGACTT	0	0	0	0	0	0	0	0	0	0	0	0	0	0	0	0	0	0	0	0	0	0	0	0	0	0	0	0	0	0	0	0	0	1	0	0	0	0
OTU_2903	Rotifera	Monogononta	Ploima				89.3	Published	TCTGGCAGATGCTAAATATCATTCAGGTATTTCTGTTGATTTGGCGATTTTTAGTCTTCATTTAGCTGGAGTTTCTTCTATTTTAGGAAGAATTAATTTTTTAACTTTGTTCTCGTACTACAAAATTGATTTCTATGGATCGTTTACCTTTGTTATTATGAGCAATTTCAGTTACAGCTGTATTGTTAATTACAAGATTA	0	0	0	0	0	0	0	0	0	0	0	0	0	0	0	0	0	0	0	0	0	0	2	0	1	0	1	6	0	1	0	2	0	1	2	5	0	1
OTU_2904	Rotifera	Monogononta	Ploima	Synchaetidae			94.5	Published	CTCTAGCTAGCTAAATATCATTCAGGTATTTCTGTTGATTTGGCGATTTTTAGTCTTCATTTAGCTGGAGTTTCTTCTATTTTAGGAAGAATTAATTTTTTAACTACTATTATTTGTTCTCGTACTACAAAATTGATTTCTATGGATCGTTTACCTTTGTTATTATGAAATTTCAGTTACAGCTGTATTGTTAATTACAAGATTG	0	0	0	0	0	0	0	0	0	0	0	0	0	0	0	0	0	0	0	0	0	0	5	2	1	0	3	5	0	1	2	2	1	1	3	5	0	4
OTU_2990	Rotifera	Monogononta	Ploima	Synchaetidae	Synchaeta		97.94	Published	ATTATCGATTCTAAATTTTCATTCTGGTATTTCTGTTGATTTAGCTATTTTTAGTTTACACTTAGCTGGTATTTCTTCTATTTTAGGTAGTATTAACTTTATGACTACTATTATCTGTTCTCGTACAACTAAAATAATTAGTATAGATCGTTTACCTTTAATATTATGATCGTTAGGTGTAACAGCTTTTCTTTTATTAACTACTTTA	0	0	0	0	0	1	0	0	0	0	0	0	0	0	0	0	0	0	0	0	3	0	0	0	3	1	2	2	3	4	0	2	0	2	4	3	2	1
OTU_2991	Rotifera	Monogononta	Ploima	Synchaetidae			94.87	Published	TCTGGCAGATGCTAAATATCATTCAGGTATTTCTGTTGATTTGGCGATTTTTAGTCTTCATTTAGCTGGAGTTTTCTTCTATTTTAGGAAGAATTAATTTTTTAACTACTATTATTTGTTTTTTGTACTACAAAATTGATTTCTATGGATCGTTTACCTTTGTTATTATGAGCAATTTCAGTTATAGCTGTATTGTTAATTACAAGATTA	3	7	3	19	13	5	5	5	14	10	6	10	8	1	6	7	12	2	5	1	5	8	28	19	8	1	11	15	11	5	23	6	3	2	5	8	4	12
OTU_2994	Rotifera	Monogononta	Ploima	Synchaetidae			93.12	Published	TCTGGCAGATGCTAAATATCATTCAGGTATTTCTGTTGATTTGGCGATTTTTAGTCTTCATATTGCTGGTATTTCGTCTATTTTAGGGAGAATTAACTTTATGACTACTATTATCTGTTCTCGTACAACTAAAATAATTAGTATAGATCGTTTACCTTTAATATTATGATCGTTAGGTGTAACAGCTTTTCTTTTATTAACTACTTTA	0	4	0	8	17	8	3	7	9	8	11	6	4	3	6	6	7	3	5	0	4	6	8	8	15	11	13	21	9	16	0	6	5	5	14	10	4	7
OTU_3001	Rotifera	Monogononta	Ploima	Synchaetidae	Synchaeta		97.35	Published	ATTATCTGATTCTAAATTTCATTCTGGTATTTCTGTCGATTTGCTATTTTTAGCTTACATTTAGCTGGTTCTTCTATTTTAGGTAGTATTAATTTTATAACTACTATTATTTGTTCTCGTACAACAAAGATAATTAGTATAGATCGTTTACCACTAATGCTATGATCACTAGGTGTTACTGCCTTTTTATTACTAACTACTTTG	0	0	0	0	0	0	66	0	0	0	202	0	255	210	210	0	0	109	0	0	0	0	0	0	0	213	0	0	0	253	0	210	158	347	0	0	151	0
OTU_3077	Rotifera	Monogononta	Ploima	Synchaetidae	Synchaeta		96.81	Published	ATTATCTGATTCTAAATTTCATTCAGGTATTTCTGTTGATTTAGCTATTTTTAGCTTACATTTAGCTGGTATTTCTTCTATTTTAGGTAGTATTAACTTTATGACTACTATTATCTGTTCTCGTACAACTAAAATAATTAGTATAGATCGTTTACCTTATGATCGTTAGGTGTAACAGCTTTTCTTTTATTAACTACTTTA	0	0	0	0	0	0	0	0	0	0	0	0	0	0	0	0	0	0	0	0	0	0	0	0	0	1	0	0	0	1	0	0	0	0	0	0	0	0
OTU_3146	Rotifera	Monogononta	Ploima	Brachionidae			94.95	Published	CCTTTCTGACTCTACCTATCATAGGGGTGTTTCTGTTGATCTTGCTATTTTTAGTTTACATCTTTTTGGTGTTTCTTCAATTTTAGGTAGAATTAACTTTTTAACTACTATTATTTGTTCACGCACTACTAAAAGTATTTCTTTGGATCGTCTTCCTCTTATGTTATGAGCTCTTGCTGTTATGGTTATTTTTTTAATTATTAGACTA	0	0	0	0	0	0	0	0	0	0	0	0	0	0	0	0	0	0	0	0	0	0	0	0	1	0	1	3	3	0	0	1	0	2	0	0	0	0
OTU_3164	Rotifera	Monogononta	Ploima	Synchaetidae	Synchaeta		96.86	Published	ATTATCTGATTCTAAATTTCATTCAGGTATTTCTGTTGATTTAGCTATTTTTAGCTTACATTTAGCTGGTATTTCTTCTATTTTAGGTAGTATTAACTTTATGACTACTATTATCTGTTCTCGTACAACTAAAATAATTAGTATAGATCGTTTACCTTTAATATTATGATCGTTAGGTGTAGCTTTTCTTTATTAACTACTTTA	0	0	0	0	0	0	0	0	0	1	0	0	0	0	0	0	0	0	0	0	3	1	1	3	2	2	2	2	4	1	0	2	0	3	2	1	1	0
OTU_3265	Rotifera	Monogononta	Ploima	Synchaetidae			92.35	Published	TCTGTCTGATGCTAAGTATCATTCTGGTATTTCTGTTGATCTTGCTATTTTCAGTCTTCATTTAGCTGGTGTCTCTTCTATTTTAGGTAGAATCAATTTTCTTACTACTATTGTGTGTTCTCGTACTACTAAGCTAATCTTTTTAGATCGTTTACTTTTATTACTATGAGCTATCTCTATTACTGCTATCTTATTTATTATAAGACTT	0	0	0	0	0	0	1	0	0	0	0	0	0	0	1	0	2	0	0	0	0	0	0	0	0	0	0	1	0	0	0	2	0	0	0	0	0	0
OTU_3278	Rotifera	Monogononta	Ploima	Synchaetidae	Polyarthra		96.32	Published	TCTTTCTGACTCTAAGTACCATTCAGGTATTTCAGTAGATTTAGCTATTTTTAGTCTTCATCTTGCTGGAGTTTCATCTATTCTCGGTAGAATTAATTTTCTTTCAACAATTATTTGCTCTCGAAAACTATATAATCTCTCTTGACCGTTTACCTTTATTCCTGTGATCTGTATCTATCACTGCTATTCTATTAATCACAAGATTG	0	0	0	0	0	0	1	0	0	0	0	0	0	0	0	0	0	0	0	0	0	0	0	0	0	1	0	0	0	0	0	0	1	1	0	1	0	1
OTU_3294	Rotifera	Monogononta	Ploima	Synchaetidae	Polyarthra		98.37	Published	TCTTTCTGACTCTAAGTACCATTCAGGTATTTCAGTAGATTTAGCTATTTTTAGTCTTCATCTTGCTGGAGTTTCATCTATTCTGGGTAGAATTAATTTTCTTTCAACAATTATTTGCTCTCGAACAACTAAGATAATCTCTCTTGACCGTTTACCTTTATTCCTGTGATCTGTATCTATCACTGCTTTTTTATTGTTGTTATCATTG	0	0	0	0	2	0	2	0	0	0	0	0	0	0	2	2	1	1	3	0	0	0	0	0	1	0	0	0	0	1	0	1	3	1	2	1	3	0
OTU_3309	Rotifera	Monogononta	Ploima	Synchaetidae	Synchaeta		95.77	Published	ATTATCTGATTCTAAATTTCATTCAGGTATTTCTGTTGATTTAGCTATTTTTAGCTTACATTTAGCTGGTATTTCTTCTATTTTAGGTAGTATTAACTTTATGACTACTATTATCTGTTCTCGTACAACTAAAATAATTAGTATAGATCGTTTACCTTTAATATTATGATCGTTAGGTGTAACAGCTTTTTTACTGTTATTATCTTTG	0	0	0	0	0	0	1	0	0	0	0	0	1	0	0	1	0	0	0	0	0	0	0	0	5	2	0	0	2	3	0	0	0	0	1	0	0	0
OTU_3312	Rotifera	Monogononta	Ploima	Synchaetidae	Synchaeta		95.9	Published	ATTATCTGATTCTAAATTTCATTCTGGAATTTCTGTTGATCTTGCAATTTTTAGTCTTCATATTGCTGGTATTTCGTCTATTATAGGAAGAATTAACTTTATAACTACTATTATTTGTTCTCGTACAACAAAAATAATTAGTATAGATCGTCTTCCTTTAATAATTTGATCCTTAGGGGTAACAGCATTCCTTTTAGTAACAACTTTA	0	0	0	0	0	0	0	0	0	0	0	0	0	0	0	0	0	0	0	0	0	0	0	0	0	0	0	0	0	0	0	0	2	0	0	0	0	0
OTU_3401	Rotifera	Monogononta	Ploima	Brachionidae			92.25	Published	CCTTTCTGACTCTACCTATCATAGAGGTGTTTCTGTTGATCTTGCTATTTTTAGTTTACATCTTTCTGGTGTTTCTTCAATTTTAGGTAGAATCAACTTTTTAACTACTATTATTTGTTCACGTACTACTAAAAGAAtttttttggatcgttttttttttatgttatgattttttGTTGTTATGGCTATTCTTTTAATTACTAGATTA	0	0	0	0	0	0	0	0	0	0	0	0	0	0	0	0	0	0	0	0	0	0	0	0	0	0	2	0	0	0	0	0	0	0	0	0	0	0
OTU_3456	Rotifera	Monogononta	Ploima	Synchaetidae	Polyarthra		95.38	Published	TCTGGCAGATGCTAAATATCATTCAGGTATTTCTGTTGATTTGGCGATTTTTAGTCTTCATTTAGCTGGAGTTTCTTCTATTTTAGGAAGAATTAATTTTTTAATTATTATTATTTGTTCTCGTACTACAAAATTGATTTTTATGGATCGTTTATTTTTGTTATTATGAGCAATTTCAGTTACAGCTGTATTGTTAATTACAAGATTA	0	0	0	0	0	0	0	0	0	0	0	1	0	0	0	0	0	0	0	0	0	0	7	4	1	0	0	3	0	1	1	0	1	0	2	1	0	0
OTU_3473	Rotifera	Monogononta	Ploima	Synchaetidae	Synchaeta		97.34	Published	ATTATCTGATTCTAAATTTCATTCTGGAATTTCTGTTGATCTTGCAATTTTTAGTCTTCATATTGCTGGTATTTCATCTATTTTAGGGAGAATTAACTTTATGACTACTATTATTTGTTCTCGTACTAGTGAGAATAGATCGTCTTCCTTTAATAATTTGATCCTTAGGGGTAACAGCATTCCTTTTAGTAACAACTTTA	0	0	0	0	0	0	0	0	0	0	0	0	0	0	0	0	0	0	0	0	0	0	1	0	0	1	0	0	0	0	0	0	2	0	0	0	0	0
OTU_3483	Rotifera	Monogononta	Ploima	Brachionidae	Keratella		96.35	Published	TCTTTCTGAATCTAAGTATCATTCTGGTATTTCAGTTGACATAGCTATTTTCAGTCTTCATTTAGCAGGAATTTCTTCCATTCTTGGTAGGATTAATTTTCTTACTACTATCGTTTGCTCTCGCACAACTAAGGTTATCTCTCTTGATCGTATGCCTCTAATGCTTTGGGCTATTTCTGTTACTGCTGTCCTTTTGATTACTAGATTG	0	0	0	4	0	16	9	4	8	10	4	10	5	8	6	14	3	11	7	0	0	0	0	0	0	0	0	0	0	0	0	0	0	0	0	0	0	0
OTU_3486	Rotifera	Monogononta	Ploima	Brachionidae			94.18	Published	CCTTTCTGACTCTACTTATCATAGAGGTGTTTCTGTTGATCTTGCTATTTTTAGTTTACATCTCCTGGTGTTTCTTCAATTTTAGGTAGAATCAATTTTTTAACTACTATTATTTGTTCACGTACTACTAAAAGTATTTCTTTGGATCGTCTTCCTCTTATTATGATCTCTTGCTGTTACGGCTATTCTTTTAATTACTAGATTA	0	0	0	0	0	5	0	2	1	0	0	2	3	0	0	0	0	2	0	0	0	0	0	1	8	0	6	1	2	4	2	4	0	3	1	8	6	1
OTU_3494	Rotifera	Monogononta	Ploima	Synchaetidae			92.35	Published	TCTGGCAGATGCTAAATATCATTCAGGTATTTCTGTTGATTTGGCGATTTTAGTCTTCATTTAGCTGGAGTTTCTTCTATTTTAGGAAGAATTAATTTAACTACTATTATTTGTTCTCGTACTACAAAATTGATTTCTATGGATCGTTTACCTTTGTTATTATGAGCAATTTCAGTTACAGCTGCTGTTAATTACAAGATTA	0	0	0	0	0	0	0	0	0	0	0	0	0	0	0	0	0	0	0	0	0	0	1	0	0	0	0	2	0	0	0	0	0	0	1	1	0	0
OTU_3508	Rotifera	Monogononta	Ploima				88.54	Published	CCTTTCTGACTCTACCTATCATAGAGGTGTTTCTGTAGACTTGGCAATTTTTAGTCTTCACTTAGCAGGTATTTCTTCTATTTTAGGTAGAATTAATTTCATAACTACAGTTCTATGTTCTCGAACAACAAAGCTCATTTCTTTAGATCGTATACCATTAATGTTATGGGCTCTGTCTATTACGGCTCTTCTTCTCGTAACTAGTTTA	0	0	0	0	0	0	0	0	1	0	0	0	0	0	0	0	0	0	0	0	0	0	0	0	1	0	1	0	0	0	0	1	0	0	0	0	0	0
OTU_3510	Rotifera	Monogononta	Ploima	Synchaetidae			94.85	Published	TCTGGCAGATGCTAAATATCATTCAGGTATTTCTGTTGATTTGGCGATTTTTAGTCTTCATCTAGCTGGAGTTTTCTTCTATTTTAGGAAGAATTAATTTTTTAACTACTATTATTTGTTCTCGTACTACAAAATTGATTTCTATGGATCGttttttttATTATTATGAGCAATTTCAGTTACAGCTGTATTGTTAATTACAAGATTA	3	0	0	2	1	0	0	3	3	0	7	5	5	0	0	3	5	0	1	8	0	0	2	2	3	2	0	9	1	11	5	11	0	0	4	1	0	4
OTU_3514	Rotifera	Monogononta	Ploima	Synchaetidae	Synchaeta		97.92	Published	ATTATCTGATTCTAAATTTCATTCTGGTATTTCTGTTGATTTAGCTATTTTTAGTTTACACTTAGCTGGTATTTCTTCTATTTTAGGTAGTATTAATTTTATAACTACTGTTATTTGTTCTCGTACAACAAAGATAATTAGTATAGATCGTTTACCATTAATGTTATGATCATTAGGTGTTACTGCCTTTTTATTAGCTACTTTA	0	0	2	0	0	0	3	0	0	0	2	2	0	0	0	1	1	0	2	0	0	0	0	0	4	4	2	8	2	1	0	0	1	2	6	0	4	1
OTU_3516	Rotifera	Monogononta	Ploima	Synchaetidae	Polyarthra		95.81	Published	TCTGGCAGATGCTAAATATCATTCAGGTATTTCTGTTGATTTGGCGATTTTTAGTTCATTTAGCTGGAGTTTCTTCTATTTTAGGAAGAATTAATTTTTTAACTACTATTATTTGTTCTCGTACTACAAAATTGATTTCTATGGATCGTTTACCTTTGTATTATGAGCAATTCAGTTACAGCCGTATTGTTAATTACAAGATTA	0	0	0	0	1	0	0	2	4	0	0	1	0	0	0	0	2	0	0	0	0	0	6	1	0	1	3	8	2	1	2	2	0	0	2	1	0	4
OTU_3520	Rotifera	Monogononta	Ploima	Synchaetidae			92.19	Published	TCTGGCAGATGCTAAATATCATTCAGGTATTTCTGTTGATTTGGCGATTTTTAGTCTTCATCTAGCTGGAGTTTCTTCTATTTTAGGAAGAATTAATTTTTTAACTACTATTATTTGTTCTCATACTACATTGATTTCTATGGATCGTTTACCTTTATTATTATGAGCAATTTCAGTTACAGCTGTATTGTTAATTACAAGATTA	11	0	0	6	4	1	0	2	4	0	11	3	2	0	3	1	4	1	1	23	0	0	9	7	1	8	5	14	0	16	5	27	2	4	8	11	2	9
OTU_3527	Rotifera	Monogononta	Ploima	Synchaetidae	Polyarthra		97.74	Published	TCTTTTCTGACTCTAAGTACCATTCAGGTATTTCAGTAGACTTAGCTATTTTTAGTCTTCATCTCGCCGGAGTTTTCATCTATTCTCGGTAGAATTAATTTTCTTTCAACAATTATTTGCTCTCGAACAACTAAGATAATCTCTCTTGACCGTTTACCTTTATTCCTGTGATCTGTATCTACCACTGCTATTCTATTAATCACAAGATTA	60	0	0	1	0	3	6	0	0	0	0	3	3	1	8	2	8	1	5	180	0	0	7	0	5	7	0	3	0	2	2	4	15	8	20	18	12	15
OTU_3530	Rotifera	Monogononta	Ploima	Synchaetidae			93.78	Published	ATTATCTGATTCTAAACTTCATTCTGGTATTTCTGTTGATTTAGCTATTTTCAGTTTACATTTAGCTGGTATTTCTTCTATTTTAGGTAGTATTAATTTTATAACTACTATTATTTGTTCTCGTACAACAAAGATAATTAGTATAGATCGTTGACCAAATGTTATGATCATTAGGTGTTACTGCCTTTTTATTACTAACTACTTTG	24	0	0	0	1	5	11	9	0	1	2	6	2	3	3	6	1	5	4	46	4	0	6	3	11	15	8	10	9	8	21	15	6	5	11	3	17	13
OTU_3531	Rotifera	Monogononta	Ploima	Synchaetidae	Synchaeta		95.77	Published	TCTGGCAGATGCTAAATATCATTCAGGTATTTCTGTTGATTTGGCGATTTTTAGTTTACACTTAGCTGGTATTTCTTCTATTTTAGGTAGTATTAATTTTTTAACTACTATTATTTGTTCTCGTACAACAAAGATAATCAGTATAGATCGTTTACCATTAATGTTATGATCACTAGGTGTTACTGCCTTTTTATTACTAACTACTTTG	0	2	3	4	21	21	4	18	23	12	10	21	25	22	10	16	19	7	17	0	0	9	8	8	40	15	43	45	15	28	10	63	11	27	42	25	19	32
OTU_3666	Rotifera	Monogononta	Ploima	Synchaetidae			94.22	Published	TCTTTCTGACTCTAAGTACCATTCAGGTATTCAGTAGATTTAGCTATTCTTAGTCTTCATCTTGCTGGAGTTTCATCTATTTTGGGTAGAATTAATTTTCTTTCAACAATTATTTGCTCTCGAACAACTAAGATAATCTCTCTTGACCGTTTTACCTTTATTCCTGTGATCTGTATCTATCATTGCTATTCTATTAATTACAAGATTA	0	0	0	0	0	0	0	0	0	0	0	1	0	2	1	0	0	0	2	0	0	0	0	0	0	0	0	0	0	0	0	2	2	2	1	0	0	3
OTU_3711	Rotifera	Monogononta	Ploima	Brachionidae	Brachionus		96.32	Published	CCTTTCTGACTCTACCTATCATAGGGGTGTTTCTGTTAATCTTGCTATTTTTAGTTTACATCTTTCTGGTGTTTCTTCAATTTTAGGTAGAAttttttttAACTACTATTATTTGTTCACGCACTACTAAAAGTATTTCTTTGGATCGTCTTCCTCTTATGTTATGAGCTCTTGCTGTTACGGCTATTCTTTTAATTACTAGACTA	0	0	0	0	0	1	0	0	2	0	0	0	1	0	0	0	0	0	0	0	0	0	0	0	2	0	2	2	1	5	0	3	1	0	1	0	0	0
OTU_3722	Rotifera	Monogononta	Ploima	Brachionidae			92.71	Published	CCTTTCTGACTCTACCTATCATAGGGGTGTTTCTGTTGATCTTGCTATTTTTAGTTTACATCTTTCTGGTGTTTCTTCAATTTTAGGTAGAATTAACTTTTTAACTACTATTATTTGTTCACGCACTACTAAAAGTATTTCTTTGGATCGTCTTCCTCTTATGTTATGAGCTCTAGCTGTCACAGCAGTTCTGCTGGTTACTAGACTA	0	0	0	0	0	1	2	0	0	0	2	0	1	0	0	0	0	0	0	0	0	0	0	0	0	0	2	0	0	0	0	0	0	0	0	0	0	0
OTU_3800	Rotifera	Monogononta	Ploima	Brachionidae			94.03	Published	CCTTTCTGACTCTACCTATCATAGGGGTGTTTCTGTTGATCTTGCTATTTTTAGTTTACATCTTTCTGGTGTTTCTTCAATTTTAGGTAGAATTAACTTTTTAACTACTATTATTTGTTCACGCACTACTAAAAGTATTTCTTTGGATCGTCTTCCTCTTATGTTATGAGCTCTTGCTGTTACGGCTATCTTACTTATTACAAGACTT	0	0	0	0	0	0	2	0	0	0	0	0	0	0	0	0	0	0	0	0	0	0	0	0	0	0	0	0	0	0	0	0	0	0	0	0	0	0
OTU_4054	Rotifera	Monogononta	Ploima	Synchaetidae			92.65	Published	ATTATCTGATTCTAAATTTCATTCAGGTATTTCTGTTGATTTAGCTATTTTTAGCTTACATTTAGCTGGTATTTCTTCTATTTTAGGTAGTATTAACTTTATGACTACTATTATCTGTTCTCGTACAACTAAAATAATTAGTATAGATCGTTTACCTTTAATATTATGATCGTTAGGTGTAACAGCTGTATTGTTAATTACAAGATTA	0	0	0	1	2	0	0	0	0	0	0	0	1	0	0	0	0	0	0	0	0	0	0	0	1	0	1	0	1	0	0	0	0	0	0	0	1	1
OTU_4068	Rotifera	Monogononta	Ploima				87.69	Published	TCTTTCAGATTCTAAATTTCATTCAGGAATTTCGGTAGATTTAGCTATTTTTAGCTTACATTTAGCTGGTATTTCTTCTATTTTAGGTAGTATTAACTTTATGACTACTATTATCTGTTCTCGTACAACTAAAATAATTAGTATAGATCGTCTTCCTTTAATAATTTGATCTTTAGGTGTAACAGCTTTTCTTTTAGTTACTACATTA	0	0	0	0	0	0	0	0	0	0	0	0	0	0	0	0	0	1	0	0	0	0	0	0	0	0	0	0	0	0	0	0	2	0	0	0	3	2
OTU_4119	Rotifera	Monogononta	Ploima	Synchaetidae	Polyarthra		95.52	Published	TCTAGCAGATGCTAAATATCATTCAGGTATTTCTGTTGATTTGGCGATTTTTAGTCTTCATTTAGCTGGAGTTTCTTCTATTTTAGGTAGTATTAATTTCATAACTACTATTATTTGTTCTCGTACTACAAAAATAATTAGTATAGATCGTTTACCTTTGTTATTATGAGCAATTTCAGTTACAGCTGTATTGTTAATTACAAGATTA	0	0	0	0	0	0	0	0	0	0	0	0	0	0	0	0	0	0	0	0	0	0	0	0	0	0	2	0	0	0	0	0	0	0	0	0	0	0
OTU_4124	Rotifera	Monogononta	Ploima	Synchaetidae			94.36	Published	ATTATCTGATTCTAAATTTCATTCTGGAATTTCTGTTGATCTTGCAATTTTTAGTCTTCATTTAGCTGGAGTTTCTTCTATTTTAGGAAGAATTAATTTTTTAACTACTATTATTTGTTCTCGTACTACTAAAATAGTGAGAATAGATCGTCTTCCTTTAATAATTTGATCCTTAGGGGTAACAGCATTCCTTTTAGTAACAACTTTA	0	0	0	0	0	0	0	0	0	0	0	0	0	0	0	0	0	0	0	0	0	0	0	0	0	0	0	2	0	0	0	0	0	0	0	0	0	0
OTU_4130	Rotifera	Monogononta	Ploima	Synchaetidae			94.61	Published	TCTGGCTGATGCTAAGTATCATTTTGGTATTTTTGTTGATCTTGTTATTTTCAGTCTTCATTTAGCTGGTGTCTCTTCTATTTTAGGTAGAATCAATTTTCTTACTACTATTGTGTGTTCTCGTACTACTAAGCTAATCTCTTTAGATCGTTTACCTTTATTACTATGAGCTATCTCTATTACTGCTATCTTACTTATTATAAGACTT	0	0	0	0	0	0	0	0	0	0	0	0	0	0	0	0	0	0	0	0	0	0	0	1	0	0	0	0	0	0	0	0	0	0	0	0	0	0
OTU_4136	Rotifera	Monogononta	Ploima	Synchaetidae			92.82	Published	TCTTTCAAGTATTGAATATCATTCTGGTATTTCTGTTGATTTAGCTATTTTCAGTTTACATTTAGCTGGAATTTCTTCTATTTTAGGTAGTATTAATTTTATAACTACTATTATTTGTTCTCGTACAACAAAGATAATTAGTATAGATCGTTTACCATTAATGTTATGATCATTAGGTGTTACTGCCTTTTTATTACTAACTACTTTG	1	0	0	0	0	0	0	1	0	0	0	0	0	0	0	0	0	0	0	0	0	0	0	0	0	0	0	0	0	0	0	0	0	0	0	0	0	0
OTU_4236	Rotifera	Monogononta	Ploima	Synchaetidae	Polyarthra		96.41	Published	TCTAGCAGATGCTAAATATCATTCAGGTATTTCTGTCGATTTGGCGATTTTTAGTCTTCATTTGGCTGGAGTTTCCTCTATTTTAGGAAGAATTAATTTTTTGACTACTATTATTTGTTCTCGTACTACAAAATTGATTTCTATGGATCGTTTACCATTATTACTATGAGCAATTTCAGTTACAGCTGTATTGTTAATTACAAGATTA	0	0	0	4	6	0	0	2	0	0	0	8	0	0	0	0	0	0	0	0	0	0	3	4	0	0	7	0	0	0	0	0	0	0	0	0	0	0
OTU_4272	Rotifera	Monogononta	Ploima	Brachionidae	Brachionus		95.74	Published	CTTTCTGACTCTACCTATCATAGGGGTGTTTCTGTTGATCTTTCTTTTTTAGTTTACATCTTTCTGGTGTTTCTCCAATTTTAGGTAGAATTAACTTTTTAACTACTATTATTTGTTCACGCACTACTAAAAGTATTTCTTTGGATCGTCTTCCTCCTATGTTATGAGCTCTTGCTGTTACGGCTATTCTTTTAATTACTAGACTA	0	0	0	0	0	0	0	0	1	1	1	0	0	0	0	0	1	0	0	0	0	0	0	0	2	0	3	2	0	2	1	3	0	0	0	1	0	0
OTU_4446	Rotifera	Monogononta	Ploima				87.63	Published	TCTTTCTGACTCTAAGTACCATTCAGGTATTTCAGTAGACTTAGCTATTTTTAGTCTTCATCTCGCTGGAGTTTCATCTATTCTCGGTAGAATTAATTTTCTTTCAACAATTATTTGCTCTCGAACAACTAAGATAATCTCTCTTGACCGTTTACCTTTATTCCTGTGATCTGTTTTAATAACAGCGTTTTTACTGTTATTATCTTTG	0	0	0	0	0	0	0	0	0	0	0	0	0	0	0	0	3	0	0	0	0	0	0	0	0	0	0	0	0	0	0	0	0	0	0	0	3	0
OTU_4451	Rotifera	Monogononta	Ploima	Brachionidae	Brachionus		95.81	Published	CCTTTCTGACTCTACCTATCATAGGGGTGTTTCTGTTGATCTTGCTATTTTTAGTTTACATCTTTTCTGGTGTTCTTCAATTTTAGGTAGAATTAACTTTTTAACTACTATTATTTGTTCACGTACTACTAAAAGTATTTCTTTGGATCGTCTTCCTCTTATGTTATGATCTCTTGCTGTTACGGCTATTCTTTTAATTACCAGATTA	0	0	0	0	0	0	0	0	0	0	0	0	0	0	0	0	0	0	0	0	0	0	0	0	0	0	0	1	0	1	0	0	0	0	0	0	0	0
OTU_4467	Rotifera	Monogononta	Ploima	Synchaetidae			93.85	Published	ATTGTCTGGTATTACAGCACATTCTGGTATTTCTGTTGATTTAGCTATTTTTAGTTTACACTTAGCTGGTATTTCTTCTATTTTAGGTAGTATTAATTTTATAACTACTATTATTTGTTCTCGTACAACAAAGATAATTAGTATAGATCGTTTACCACTAATGTTATGATCATTAGGTGTTACTGCCTTTTTATTACTAACTACTTTG	0	0	0	0	0	0	0	0	0	0	0	0	0	0	1	0	1	1	1	0	0	0	0	0	0	0	0	0	2	0	0	0	0	0	0	0	0	0
OTU_4472	Rotifera	Monogononta	Ploima	Synchaetidae			94.71	Published	ATTATCTGATTCTAAATTTCATTCTGGTATTTCAGTAGACTTAGCTATTTTTAGTCTTCATCTCGCTGGAGTTTCGTCTATTCTCGGTAGAATTAATTTTCTTTCAACAATTATTTGCTCTCGAACAACTAAGATAATCTCTCTTGACCGTTTACCTCTATTCCTGTGATCTGTATCTATCACTGCTATTCTATTAATCACAAGATTA	0	8	0	2	3	4	14	4	1	3	3	1	4	4	9	4	9	4	11	6	3	4	4	1	12	16	9	4	4	8	0	14	15	16	10	13	17	12
OTU_4560	Rotifera	Monogononta	Ploima	Brachionidae			93.33	Published	TTTATCAAGTGCAACAGCTCATTCTGGTATTTCAGTTGACTTAGCTATTTTCAGTCTTCACTTAGCAGGAATTTCTTCCATTCTTGGTAGGATTAATTTTCTTACTACTATCGTTTGCTCTCGCACAACTAAGGTTATTTCTCTTGATCGTATGCCTCTAATGCTTTGGGCTATCTCTGTTACTGCTATTCTTTTGATTACTAGGTTG	0	0	0	0	0	0	0	0	1	0	0	0	2	2	1	0	0	2	0	0	0	0	0	0	0	0	0	0	0	0	0	1	0	0	0	0	0	0
OTU_4613	Rotifera	Monogononta	Ploima	Synchaetidae	Polyarthra		96.37	Published	TCTAGCAGATGCTAAATATCATTCAGGTATTTCTGTTGATTTGGCTATTTTTAGTCTTCATTTAGCTGGAGTCCTTCTATTTTAGGGAGAATTAATTTTTTAACTACTATTATTTGTTCTCGTACTACAAAATTGATTCTATGGGTCGTTTACCTTTGTTATTATGAGCAATTTCAGTTACAGCTGTATTGTTAATTACAAGACTA	0	0	0	6	6	1	0	5	3	4	1	4	4	0	1	6	4	0	6	0	0	0	3	2	2	0	8	1	0	0	2	4	1	1	8	6	2	3
OTU_4629	Rotifera	Monogononta	Ploima	Synchaetidae	Polyarthra		96.5	Published	TCTTTCTGACTCTAAGTACCATTCAGGTATTTCAGTAGATTTAGCTATTTTTAGTCTCATCTTGTTGGAGTTTCATCTATTTTGGGTAGAATTAATTTTCTTTCAACAATTATTTGCTCTCGAACAACTAAGATAATCTCTCTTGACCGTTTACCTTTATTCCTGTGATCTGTATCTATCACTGCTATTCTATTAATTACTAGACTA	0	0	0	2	0	2	0	2	0	0	0	2	0	1	3	8	0	1	5	0	5	0	1	1	2	1	1	0	2	0	2	2	2	4	2	6	5	0
OTU_4634	Rotifera	Monogononta	Ploima	Synchaetidae	Polyarthra		95.57	Published	TCTAGCAGATGCTAAATATCATTCAGGTATTTCTGTTGATTTGGCTATTTTTAGTCTTCTTTAGCTGGAGTTTCTTCTATTTTAGGGAGAATTAATTTTTTAATTACTATTATTTGTTCTCGTACTACGAAATTGATTTCTATGGATCGTTTACCTTTGTTATTATGAGCAATTTCAGTTACAGCTGGATTGTTAATTACAAGATTA	0	0	0	0	1	0	0	0	0	0	0	0	0	0	0	0	1	0	0	0	0	0	0	0	0	0	1	0	0	0	0	0	0	0	0	0	0	0
OTU_4635	Rotifera	Monogononta	Ploima	Synchaetidae			91.18	Published	TCTAGCAGATGCTAAATATCATTCAGGTATTTCTGTTGATTTGGCGATTTTTAGTCTTCATTTAGCTGGAGTTTCTTCTATTTTAGGAAGAATTAATTTTTTAACTACTATTATTTGTTCTCGTACTACAAAATTGATTTCTATAGATCGTTTACCTTTGTTATTATGAGCAATTTCAGTTACAGCATTTTTATTATTGTTATCGTTA	5	0	0	2	2	0	0	1	1	0	0	1	0	3	0	0	1	0	0	0	0	0	0	0	0	0	0	0	0	0	0	0	0	0	1	0	0	0
OTU_4637	Rotifera	Monogononta	Ploima	Synchaetidae	Polyarthra		96.3	Published	TCTAGCAGATGCTAAATATCATTCAGGTATTTCTGTTGATTTGGCGATTTTTAGTCTTCATTTAGCTGGAGTTTCTTCTATTTTAGGAAGAATTAATTTTTTAACTACTATTATTTGTTCTCGTACTACAGAGTTGATTTCTATAGATCGTTTACCTTTGTTATTATGAGCAATTTCAGTTACAGCTGTATTGTTGTTATCATTG	0	0	0	0	1	0	0	0	0	0	0	0	0	0	0	0	0	0	0	0	0	0	0	0	0	0	0	0	0	0	0	0	0	0	0	0	0	0
OTU_4665	Rotifera	Monogononta	Ploima	Brachionidae			94.27	Published	TCTGGCAGATGCTAAATATCATTCTGGTATTTCAGTTGACTTAGCTATTTTCAGTCTTCATTTAGCAGGAATTTCTTCCATTCTTGGTAGGATTAATTTTCTTACTACTATCGTTTGCTCTCGCACAACTAAGGTTATTTCTCTTGATCGTATGCCTCTAATGCTTTGGGCTATGTCTGTAACAGCTGTTCTTCTAGTTACTAGACTA	0	0	0	0	0	0	8	0	0	0	0	1	0	1	0	2	0	3	1	0	0	0	0	0	0	0	0	0	0	0	0	0	0	0	0	0	0	0
OTU_4700	Rotifera	Monogononta	Ploima	Synchaetidae			94.55	Published	TTTATCAGATATTAAATATCATTCTGGTTCTTCAGTAGATTTAGCTATTTTTAGTCTTCATCTTGCTGGAGTTTCATCTATTCTCGGTAGAATTAATTTTCTTTCAACAATTATTTGCTCTCGAACAACTAAGATAATCTCTCTTGACCGTTTACCTTTATTCCTGTGATCTGTATCTATCACTGCTATTCTATTAATCACAAGATTA	0	0	0	0	0	0	0	0	0	0	0	2	0	0	0	0	0	5	2	0	1	0	0	0	0	0	0	0	0	0	0	0	0	0	0	0	0	0
OTU_4808	Rotifera	Monogononta	Ploima	Synchaetidae	Polyarthra		95.88	Published	TCTAGCAGATGCTAAATATCATTCAGGTATTTCTGTTGATTTGGCGATTTTTAGCCTTCATTTAGCTGGAGTTTCTTCTATTTTAGGAAGAATTAATTTTTTAACTACTATTATTTCTCTCGTACTACAATATTGATTTCTATGGATCGTTTACCTTTATTATTATGAGCAATTTCAGTTACAGCTGTATTGTTAATTACAAGACTA	4	0	0	0	2	0	0	0	0	0	1	0	0	0	0	2	0	0	0	0	0	0	0	0	0	0	0	2	0	1	0	9	0	1	4	1	0	1
OTU_4816	Rotifera	Monogononta	Ploima	Synchaetidae			94.35	Published	GCTATCGAGCGCAACCGCACATTCTGGAGGTTCTGTAGATTTAGCTATTTTTAGCTTACATTTAGCTGGTATTTCTTCTATTTTAGGTAGTATTAACTTTATGACTACTATTATCTGTTCTCGTACAACTAAAATAATTAGTATAGATCGTTTACCACTAATGTTATGATCATTAGGTGTTACTGCTTTTTTACTACTAACTACTTTG	0	0	0	0	0	3	1	0	2	3	1	0	0	0	0	1	0	0	0	0	0	0	0	0	2	0	0	0	0	0	0	0	0	0	0	0	0	0
OTU_4824	Rotifera	Monogononta	Ploima	Brachionidae	Brachionus		95.31	Published	CCTTTCTGACTCTACCTATCATAGGGGTGTTTCTGTTGATCTTGCGATTTTTAGTTTACAGCTTTCTGGTGTTTCTTCAATTTTAGGTAGAATTAACTTTTTAACTACTATTATTTGTTCACGCACTACTAAAAGTATTTCTTTGGATCGTCTTCCTCTTACGTTATGAGCTCTTGCTGTTACGGCTACTCTTTTAATTACTAGACTA	0	0	0	0	0	1	1	1	0	2	0	0	0	0	3	0	1	1	0	0	0	0	0	1	8	1	3	3	1	3	2	11	4	3	1	1	4	3
OTU_4850	Rotifera	Monogononta	Ploima	Synchaetidae			90.16	Published	TCTGGCAGATGCTAAATATCATTCAGGTATTTCTGTTGATTTGGCGATTTTTAGTCTTCATTTAGCTGGTGTCTCTTCTATTTTAGGTAGAATCAATTTTCTTACTACTATTGTGTGTTCTCGTACTACTAAGCTAATCTCTTTGGATCGTTTACCTTTGTTATTATGAGCAATTTCAGTTACAGCTGTACTGTTAATTACAAGATTA	0	0	0	0	3	0	0	0	0	0	0	0	0	0	0	1	0	0	1	0	0	0	0	0	0	0	0	0	0	0	0	0	0	0	0	2	0	1
OTU_4866	Rotifera	Monogononta	Ploima	Synchaetidae			92.53	Published	CTATCTGACTCTAAGTTCCATTCTGGAATTTCTGTAGACCTTGCCATTTTTAGTTTACATCTTGCTGGTATCTCTTCTATTCTTGGTAGAATCAATTTTCTTTCTACAATTATTTGTTCTCGAGACCAAGCTTGTTTCTCTGGATCGTCTTCCTCTGATGCTTTGAGCTATAGCTGTCACAGCAGTTCTGCTGGTACTAGACTA	0	0	0	0	0	0	3	0	0	103	0	0	0	0	0	0	0	0	0	0	0	0	0	0	0	1	0	0	17	0	0	0	0	0	0	0	0	0
OTU_4869	Rotifera	Monogononta	Ploima				86.67	Private	TCTTTCTGATTCTAAATATCATTCTGGTATTTCTGTAGATTTAGCTATTTTTAGTTTACATCTTGCAGGTATTTCTTCAATTTTAGGTAGAATTAACTTCCTTACTACTATTCTCTGTTCTCGTACTGCTAAATTGATCTCATTAGATCGTTTACCTCTTTTTTTATGAGCGGTTGCTATTACAGCCGTTCTCTTAATTACAAGACTT	0	0	0	0	0	0	0	0	0	0	0	1	0	0	0	0	0	0	0	0	0	0	0	0	0	0	0	0	0	0	0	0	0	0	0	0	0	0
OTU_4870	Rotifera	Monogononta	Ploima	Synchaetidae	Synchaeta		96.92	Published	ATTATCTGACTCTAAATTTCATTCTGGTATCTCTGTCGATTTAGCTATTTTTAGCTTACATTCAGCTGGTATTTCTTCTATTTTAGGTAGTATTAATTTTATAACTACTATTATTTGTTCTCGTACAACAAAGATAATTAGTATAGACCGTTTACCATTAATGTTATGATCATTAGGTGTTACTGCCTTTTTATTACTAGCTACTTTG	0	0	0	0	0	0	0	0	0	0	0	4	0	0	0	1	0	0	0	0	0	0	0	0	0	0	1	0	0	0	3	0	0	0	0	0	0	0
OTU_4938	Rotifera	Monogononta	Ploima	Brachionidae	Brachionus		95.74	Published	CCTTTCTGACTCTACCTATCATAGGGGTGTTTCTGTTGATCTTGCTATTTTTAGTTTACCTTTCTGGTGTTCTTCAATTTTAGGTAGAAAAACTTTTTAACTACTATTATTTGTTCACGCACTACTAAAAGTATTTCTTTGGATCGTCTTCCTCTTATGTTATGAGCTCTTGCTGTTACGGCTATTCTTTTAATTACTAGACTA	0	0	0	0	0	0	0	0	1	0	0	0	0	0	0	0	0	0	0	0	0	0	0	0	1	0	0	0	0	2	0	2	0	1	3	0	0	0
OTU_4941	Rotifera	Monogononta	Ploima	Synchaetidae			91.71	Published	TCTTTCTTACTCTAAGTACCATTCAGGTATTTCAGTAGATTTAGCTATTTTTAGTCTTCATTTAGCTGGAGTTTCTTCTATTTTAGGAAGAATTGATTTTCTTTCAACAATTATTTGCTCTCGAACAACTAAGATAATCTCTCTTGACCGTTTACCTTTATTCCTGTGATCTGTATCTATCACTGCTATTCTATTAATCACAAGATTA	0	0	0	0	0	0	0	0	0	0	0	0	0	0	0	2	0	0	0	0	0	0	0	0	0	0	0	0	0	0	0	0	2	0	0	1	0	0
OTU_4952	Rotifera	Monogononta	Ploima	Brachionidae			92.71	Published	CCTTTCTGACTCTACCTATCATAGGGGTGTTTCTGTTGATCTTGCTATTTTTAGTTTACATCTTTCTGGTGTTTCTTCAATTTTAGGTAGAATTAACTTTTTAACTACTATTATTTGTTCACGCACTACTAAAAGTATTTCTTTGGATCGTCTTCCTCTTATGTTATGAGCAATTTCAGTTACAGCTGTATTGTTAATTACAAGATTA	0	0	0	0	0	0	0	0	1	0	0	0	0	1	0	0	3	1	0	0	0	0	0	0	2	1	1	3	0	0	0	0	0	0	0	1	0	1
OTU_4954	Rotifera	Monogononta	Ploima	Synchaetidae			92.06	Published	ACTATCAAGTGCAACTGCACATTCTGGTATTTCTGTTGATTTAGCTATTTTCAGTTTACATTTAGCTGGTATTTCTTCTATTTTAGGTAGTATTAATTTTATAACTACTATTATTTGTTCTCGTACAACAAAGATAATTAGTATAGATCGTTTACCACTAATGTTATGATCATTAGGTGTTACTGCCTTTTTATTACTAACTACTTTG	5	0	0	0	4	1	1	0	1	5	1	2	1	2	5	2	0	0	1	9	5	5	1	0	0	0	0	1	0	0	0	1	1	2	1	0	0	2
OTU_4981	Rotifera	Monogononta	Ploima	Synchaetidae			93.6	Published	TCTGTCTGATGCTAAGTATCATTCTGGTATTTCTGTTGATCTTGCTATTTTCAGTCTTCATTTAGCTGATGTCTCTTCTATTTTAGGTAGAATCAATTTTCTTACTACTATTGTGTATTCTCGTACTACTAAGCTAATCTCTTTAGATCGTTTACCTTTATTACTATGAGCTATCTCTATTACTTATCTTACTTATTACAAGACTT	0	0	0	0	0	0	2	0	0	0	0	1	0	1	0	0	0	0	0	0	0	0	0	0	0	1	0	0	0	0	0	0	1	0	0	1	0	0
OTU_5001	Rotifera	Monogononta	Ploima	Synchaetidae	Synchaeta		97.4	Published	ATTATCTGATTCTAAATTTCATTGGAATTTCTGTTGATCTTGCAATTTTTAGTCTTCATATTGCTGGTATTTCGTCTATTTTAGGGAAATCAACTTTATGACTACTATTATTTGCTCTCGTACTACTAAAATAGTGAGAATAGATCGTCTTCCTTTAATAATTTGATCCTTAGGGGTAACAGCATTTCTTTTTAGTAACAACTTTA	0	0	0	0	0	0	0	0	0	0	2	0	0	0	0	0	0	0	1	0	0	0	5	2	1	0	3	0	1	3	0	1	0	2	0	1	0	0
OTU_5009	Rotifera	Monogononta	Ploima	Synchaetidae			92.82	Published	ATTATCTGATTCTAAATTTCATTCTGGTATTTCTGTTGATTTAGCTATTTTTAGTTTACACTTAGCTGGTATTTCTTCTATTTTAGGTAGCATTAATTTTATAACTACTATTATTTGTTTTTGTATAACAAAGATAATTAGTATAGATCGTTTACCACTAATGTTATGATCATTAGGTGTTATTGCCTTTTTATTATTAACTACTTTG	0	0	0	0	0	0	0	0	0	0	0	0	0	0	0	0	0	0	0	0	0	0	0	0	0	0	0	0	1	0	0	0	0	0	0	0	0	2
OTU_5010	Rotifera	Monogononta	Ploima	Synchaetidae			93.85	Published	ATTATCTGATTCTAAATTTCATTCTGGTATTTCTGTCGATTTAGCTATTTTTAGCTTACATTTAGCTGGTATTTCTTCTATTTTAGGTAGTATTAACTTTATGACTACTATTATCTGTTCTCGTACAACTAAAATAATTAGTATAGATCGTTTACCTTTAATATTATGATCGTTAGGTGTTACTGCTTTTTTACTACTAACTACTTTG	0	0	0	0	3	17	21	2	4	13	14	5	3	2	2	11	1	3	5	0	0	20	0	2	53	22	12	17	18	56	8	7	5	25	17	15	14	10
OTU_5011	Rotifera	Monogononta	Ploima	Synchaetidae			93.81	Published	ATTATCTGATTCTAAATTTCATTCTGGTATTTCTGTTGATTTAGCTATTTTTAGTTTACACTTAGCTGGTATTTCTTCTATTTTAGGTAGTATTAATTTTATAACTACTATTATCTGTTCTCGTACAACTAAAATAATTAGTATAGATCGTTTACCTTTAATATTATGATCGTTAGGTGTTACTGCCTTCTTATTACTAACTACTTTG	0	0	0	0	0	1	1	0	0	0	2	2	0	0	0	0	0	0	0	0	0	0	0	0	5	6	1	4	0	4	0	0	0	0	4	0	0	4
OTU_5013	Rotifera	Monogononta	Ploima	Synchaetidae	Polyarthra		96.37	Published	CTCTGGCAGATGCTAAATATCATTCAGGTATTTCTGTTGATTTGGCGATTTTTAGTCTTCATTTAGCTGGAGTTTCTTCTATTTTAATAAAAGAATTAATTTTTTAACTACTATTATTTGTTCTCGTACTACAAAATTGATTTATGGATCGTTTACCTTTGTTATTATGAGCAATTTCAGTTACAGCTGTATTGTTAATTACAAGATTA	2	4	3	16	20	7	4	4	21	7	8	16	5	4	9	8	15	3	10	0	5	0	36	16	6	7	10	24	10	3	20	16	4	9	5	13	2	9
OTU_5016	Rotifera	Monogononta	Ploima	Synchaetidae			94.87	Published	ATTATCTGATTCTAAATTTCATTCTGGTATTTCTGTTGATTTAGCTATTTTTAGTTTACACTTAGCTGGTATTTCTTCTATTATAGGAAGAATTAACTTTATAACTACTATTATTTGTTCTCGTACAACAAAAATAATTAGTATAGATCGTCTCCCTTTAATAATTTGAGCTTTAGGTGTAACAGCTTTTCTTTTATTAACTACTTTA	0	0	0	0	2	2	17	3	4	4	5	8	5	2	2	9	2	3	11	0	2	0	2	3	3	23	6	7	7	10	9	10	18	3	9	0	20	28
OTU_5022	Rotifera	Monogononta	Ploima	Brachionidae			94.65	Published	TCTGTCTGATGCTAAGTACCATTCCGGTATTTCAGTTGATCTTGCTTTTTAGTCTTCATTTAGCAGGAATTTCTTCTATTCTTGGCAGAATTAATTTTCTTACTACCATTGTTTGTTCTCGTACTACTAAAGTCATTTCCCTTGATCGTATGCCTCTTATACTTTAAGCTATCTCAGTTACTGCTGTCCTTTTGATTACTAGATTG	0	1	0	0	0	1	5	0	2	5	0	4	0	2	7	7	6	6	1	0	0	0	0	0	0	0	0	0	0	0	0	0	0	0	1	0	0	0
OTU_5023	Rotifera	Monogononta	Ploima	Synchaetidae			94.15	Published	CCTCTCCGATTCTAAGTATCACTCTGGAATCTCTGTAGACCTAGCTATTTTCAGACTTCATCTAGCAGGTGTTTCTTCTATTCTTGGTAGAATTAACTTCCTTTCTACTATCATTTGTTCACGTACAACAAAACTTATTTCTCTAGATCGTCTCCCCCCCTTTGAGCTATGTCTGTAACAGCTGTTCTTCTAGTTACTAGACTA	0	0	0	0	0	0	2	0	0	0	0	0	0	0	0	0	0	0	0	0	0	0	0	0	0	1	0	0	0	0	0	0	0	0	0	0	0	0
OTU_5026	Rotifera	Monogononta	Ploima	Synchaetidae	Synchaeta		95.38	Published	TTTGTCAGATTCTAAGTATCATTCTGGTATTTCTGTCGATTTAGCTATTTTTAGCTTACATTTAGCTGGTATTTCTCCTATTTTAGGTAGTATTAATTTTATAACTACTATTATTTGTTCTCGTACAACAAAGATAATTAGTATAGATCGTTTACCACTAATGTTATGATCATTAGGTGTTACTGCCTTCTTATTACTAACTACTTTG	0	0	0	0	1	1	1	0	2	3	5	0	0	0	0	1	0	2	6	0	0	0	0	0	3	1	0	0	0	2	0	0	0	1	2	0	4	1
OTU_5031	Rotifera	Monogononta	Ploima	Synchaetidae	Synchaeta		95.38	Published	TCTTTCAGATTCTAAATTTCATTCAGGAATTTCTGTTGATCTTGCAATTTTTAGTCTTCATATTGCTGGTATTTCATCTATTTTAGGGAGAATTAACTTTATGACTACTATTATTTGTTCTCGTACTACTAAAATAGTGAGAATAGATCGTCTTCCTTTAATAATTTGATCCTTAGGGGTAACAGCATTCCTTTTAGTAACAACTTTTA	0	0	0	6	3	2	3	2	3	1	3	2	3	3	1	1	0	2	2	0	12	19	15	0	12	11	19	14	5	12	6	1	7	8	20	11	11	7
OTU_2430	Arthropoda	Ostracoda	Podocopida	Candonidae			98.52	Published	ATTATCAAAAACTTATCCCACTCAGGAGCAAGAGTCGATCTTTCGATCTTCTCCTTACACTTAGCAGGTGCTAGATCCATTTTAGGAGCTATTAACTTTATCACCACTATTGCTAATATACGAGCAGCAAGAATATCCCTAGATCGTATTCCTTTATTTGTTTGATCTGTTGGCATTACCGCCCTTCTTCTTTTACTTTCATTA	0	7	0	0	0	0	0	0	0	0	0	0	0	0	0	0	0	0	0	0	0	0	0	0	0	0	0	0	0	0	0	0	0	0	0	0	0	0
OTU_1181	Bryozoa	Phylactolaemata	Plumatellida	Fredericellidae			90.95	Published	TTTGTCCTCTAATGTCTCCCATGCAGGGAGATCTGTGGATTTGGCCATTTTCTCCTTACATTTGGCTGGTGTCTCTTCCATTTTAGGGGCTTTGAATTTCATTACTACTATCATGAATATACGATGAGGTGGAATGACTATAGAGCGAGTCCCTCTTTTTGCTTGGTCTATTCTTATTACAGCAATCCTTCTTTTACTATCTCTA	0	0	0	0	0	2	0	0	0	0	0	0	0	0	0	0	0	0	0	0	0	0	0	0	0	0	0	0	0	0	0	0	0	0	0	0	0	0
OTU_1201	Bryozoa	Phylactolaemata	Plumatellida				88.73	Published	TCTTTCATCTAATGTATCTCATGCAGGGGGTTCAGTAGATTTGGCTATTTTCTCTCTCCACTTAGCAGGAGTTTCATCTATTTTAGGTGCTCTAAATTTCATCACTACAATTGTCAACATGCGATGAGGGGGAATGACATTTGAACGAGTACCTTTATTTGCATGATCAATCTTAATTACTGCTATCCTTCTTCTTTTATCTCTT	35	0	0	2	0	4	1	0	0	0	0	1	1	0	2	0	0	0	0	4	0	0	0	0	0	0	0	0	0	0	0	0	0	0	0	0	0	0
OTU_4147	Bryozoa	Phylactolaemata	Plumatellida	Plumatellidae	Hyalinella		96.57	Private	TCTTTCTTCTAATATTTCTCATGCAGGTGGTTCAGTAGATTTGGCAATTTTCTCCCTTCATCTAGCAGGAATTTCATCTATTCTAGGTGCTTTAAATTTCATCACCACAATTGTTAACATGCGGTGAGGGGGAATAACATTTGAGCGAGTACCTTTGTTTGCGTGGTCTATTTTAATTACCGCTATTCTCCTCCTTCTTTCTCTT	0	0	0	0	0	1	0	3	0	0	0	0	0	0	0	0	0	0	0	0	0	0	0	0	0	0	0	0	0	0	0	0	0	0	0	0	0	0
OTU_342	Annelida	Polychaeta	Terebellida	Ampharetidae	Hypania	Hypania invalida	100	Private	ATTAGCAAGAAATATCGCTCATAGGGGCCCATCAGTAGATTTTGCAATTTTTTCTTTACATCTAGCAGGAATTTCATCAATTTTAGGTGCTTTAAATTTTATTACCACTATTTCTAATATACGATTAAAAAAATACGAATTAGAAAATATTCCATTATTTGTCTGAGCTGTATTAATCACAGTAATTCTTTTATTACTATCTCTT	0	27	34	45	2	5	6	4	13	0	5	7	15	3	16	4	1	10	14	21	6	17	30	0	0	3	1	4	6	3	0	14	1	13	9	3	5	11
OTU_14	Annelida	Polychaeta	Spionida	Spionidae			92.12	Published	TTTATCTAGCGCTACAGCTCATTCAGGTGGTGCTGTAGATTTAGCTATTTTTAGTTTACATTTATCAGGTGCGTCATCTATTTTAGGTGCTATTAATTTTATTTGTACAATTTTTAATATGCGAGTGAAAAGTTTATCTTTCCACAATCTTCCATTATTCGTATGATCTGTTTTAATTACGGCATTTTTATTGTTATTATCTTTA	12417	8183	14257	3534	1861	1099	1181	1520	843	3376	2077	988	2390	2289	1759	810	1349	1708	1342	7866	5571	8792	1764	766	530	534	793	414	1783	903	738	1563	874	968	483	921	805	664
OTU_34	Annelida	Polychaeta	Spionida	Spionidae			91.13	Published	ATTATCAAGTGCAACTGCACATTCTGGTGGTTCTGTAGACTTAGCTATTTTTAGTTTACATTTATCAGGTGCGTCTTCTATTTTAGGGGCTATTAATTTTATTTGTACAATTTTTAATATGCGAGTAAAAAGTCTATCTTTTCATAATTTACCATTATTTGTATGAGCTGTTTTAATTACTGCGTTTTTATTATTACTATCATTA	1631	2783	4664	1209	606	462	415	651	390	1294	702	374	705	705	631	283	474	566	525	1008	2509	3866	719	227	352	243	318	210	641	387	532	650	319	332	189	287	363	309
OTU_39	Annelida	Polychaeta	Spionida	Spionidae			90.15	Published	GTTATCAAGTGCAACTGCACATTCTGGAGGTTCTGTAGATTTAGCTATTTTTAGTTTACATTTATCTGGTATGTCTTCTATTTTAGGTGCTATTAATTTTATTTGTACAATTTTTAATATGCGAGTAAAAAGTTTATCTTTTCACAATTTACCGTTATTTGTATGAGCTGTTTTAATTACTGCGTTTTTGTTATTATTATCTTTA	550	1037	1493	435	220	168	154	224	157	475	238	148	244	250	237	90	100	177	157	734	1532	2224	546	208	215	154	181	139	543	243	303	320	217	187	125	151	233	173
OTU_100	Annelida	Polychaeta	Spionida	Spionidae			91.63	Published	GTTATCTGGTGCTACAGCTCATTCAGGTGGTTCTGTAGATTTAGCTATCTTTAGTTTACATTTATCAGGTGCGTCATCTATTTTAGGTGCTATTAATTTTATTTGTACCATTTTTAATATGCGAGTAAAAAGTTTATCTTTCCACAATCTTCCATTATTCGTATGATCTGTTTTAATTACAGCATTTTTATTGTTACTATCTTTA	212	314	498	117	69	32	29	63	37	154	72	35	86	80	69	24	45	46	37	268	289	456	81	31	36	17	43	26	94	31	12	65	44	28	22	33	33	27
OTU_491	Annelida	Polychaeta	Spionida	Spionidae			90	Published	GCTATCGAGCGCAACCGCACATTCTGGAGGTTCTGTAGATTTAGCTATTTTTAGTTTACATTTATCTGGTGCGTCTTCTATTTTAGGTGCTATTAATTTTATTTGTACAATTTTTAATATGCGAGTAAAAAGTCTATCTTTTCATAATTTACCGTTGTTTGTATGAGCTGTTTTAATTACTGCTTTTTTATTGTTGTTATCATTG	30	375	581	169	108	47	56	108	46	206	94	36	95	86	97	39	51	96	71	37	242	395	49	4	15	9	11	7	34	19	1	38	11	14	15	18	24	13
OTU_738	Annelida	Polychaeta	Spionida	Spionidae			90.64	Published	GTTGTCCAGTGCAACAGCTCACTCTGGCGGTTCTGTGGATTTAGCTATATTTAGTTTACATTTATCAGGTGCGTCATCTATTTTAGGTGCCATTAACTTTATTTGTACAATCTTTAATATGCGAGTAAAAAGTTTATCTTTCCACAATCTTCCACTATTCGTATGGTCTGTTTTAATTACAGCATTTTTATTATTGTTATCGTTA	78	257	429	126	43	49	33	37	25	141	66	29	62	55	73	23	48	41	37	63	76	166	19	0	3	2	7	6	14	15	1	23	12	8	3	15	9	7
OTU_766	Annelida	Polychaeta	Spionida	Spionidae			91.5	Published	GCTATCGAGCGCAACAGCTCACTCTGGAGGTTCTGTAGATTTAGCAATATTTAGTTTACATTTATCAGGTGCGTCTTCTATTTTAGGAGCTATTAATTTCATTTGTACAATCTTCAATATGCGAGTAAAAAGTTTATCTTTTCATAATTTACCATTATTTGTGTGGTCTGTTTTAATTACTGCTTTTTTATTGTTGTTATCATTG	363	3313	5340	1513	977	624	520	875	450	2063	965	451	1025	870	1061	376	647	851	732	264	1447	2638	282	38	104	43	206	137	209	251	11	391	199	144	127	232	243	166
OTU_965	Annelida	Polychaeta	Spionida	Spionidae			90.5	Published	GTTATCAAGTGCAACTGCACATTCTGGAGGTTCTGTAGATTTAGCTATTTTTAGTTTACATTTATCTGCATCTTCTATTTTAGGTGCTATTAATTTTATTTGTACAATTTTTAATATGCGAGTAAAAAGTCTATCTTTTCATAATTTACCATTATTTGTATGAGCTGTTTTAATTACTGCGTTTTTATTATTATTATCATTA	741	528	941	216	111	75	85	113	55	244	83	42	125	125	131	58	84	110	92	543	375	707	104	48	38	38	39	31	78	29	83	75	32	48	17	33	41	34
OTU_1296	Annelida	Polychaeta	Spionida	Spionidae			91.13	Published	GCTATCGAGCGCAACCGCACATTCTGGAGGTTCTGTAGATTTAGCTATTTTTAGTTTACATTTATCTGGTGCGTCTTCTATTTTAGGTGCTATTAATTTTATTTGTACAATTTTTAATATGCGAGTAAAAAGCCTATCTTTTCATAATTTACCATTGTTTGTATGATCTGTTTTAATTACAGCGTTTTTATTATTATTATCATTA	54	148	188	50	30	25	13	32	19	46	24	9	21	27	31	6	12	24	18	30	86	169	25	4	11	7	11	4	11	10	9	13	5	6	2	3	16	2
OTU_1440	Annelida	Polychaeta	Spionida	Spionidae			90.55	Published	GTTATCAAGTGCAACTGCACATTCTGGAGGTTCTGTAGATTTAGCTATTTTTAGTTTACATTTATCTGGTGCATCTTCTATTTTAGGTGCTATTAATTTTATTTGTACAATTTTTAATATGCGAGTAAAAAGTCTATCTTTCATATTTACCATTATTTGTATGAGCTGTTTTAATTACTGCGTTTTTATTATTATTATCATTA	36	22	21	3	2	0	0	2	1	8	2	1	0	2	2	1	1	1	2	18	15	16	4	0	2	0	0	1	4	0	1	4	0	2	1	0	0	2
OTU_1883	Annelida	Polychaeta	Spionida	Spionidae			90.5	Published	TTTATCAAGTGCAACAGCTCATTCCGGAGGTTCTGTAGATTTAGCTATTTTTAGTTTACATTTATTTGGTGCGTCTTCTATTTTAGGTGCTATTAATTTTATTTGTACAATTTTTAATATGCGAGTAAAAAGTCTATCTTTTCATAATTTACCGTTGTTTGTATGAGCTGTTTTAATTACTGCTTTTTTATTGTTGTTATCATTG	64	232	432	126	86	28	49	67	45	119	68	31	59	60	51	21	45	60	65	42	198	373	58	6	17	9	13	10	28	26	5	42	24	18	15	16	30	20
OTU_1977	Annelida	Polychaeta	Spionida	Spionidae			90.15	Published	GTTGTCCAGTGTAACAGCTCATTCTGGAGGTTCTGTAGATTTAGCTATTTTTAGTTTACATTTATCTGGTGCATCTTCTCTTTTAGGTGCTATTAATTTTATTTGTACAATTTTTAATATGCGAGTAAAAAGTCTATCTTTTCATAATTTACCATTATTTGTATGAGCTGTTTTAATTACTGCGTTTTTATTATTATTATCATTA	44	99	147	38	19	12	9	11	6	37	13	4	22	25	29	8	11	21	16	29	38	89	5	0	1	1	2	4	5	0	1	5	5	1	2	2	4	2
OTU_2166	Annelida	Polychaeta	Spionida	Spionidae			90.5	Published	GCTATCGAGCGCAACCGCACATTCTGGAGGTTCTGTAGATTTAGCTATCTTTAGTTTACATTTATCAGGTGCGTCATCTATTTTAGGTGCTATTAATTTTATTTGTACAATTTTTAATATGCGAGTGAAAAGTTTATCTTTTCATAATTTACCATTATTTGTGTGGTCTGTTTTAATTACTGCTTTTTTATTGTTGTTATCATTG	1	22	23	11	6	1	5	3	1	13	4	4	5	5	1	3	5	6	5	0	6	14	1	0	0	0	1	0	0	1	0	0	0	0	0	0	1	0
OTU_2301	Annelida	Polychaeta	Spionida	Spionidae			91.41	Published	TTTATCTAGCGCTACAGCTCATTCAGGTGGTGCTGTAGATTTAGCTATCTTTAGTTTACATTTATCAGGTGCGTCATCTATTTTAGGTGCTATTAATTTTATTTGTACAATTTTTAATATGCGAGTGAAAAGTTTATCTTTCCACAATCTTCCATTATTCATCTGTTTTAATTACAGCATTTTTATTGTTATTATCTTTA	5882	3568	6092	1459	822	432	511	609	324	1512	772	432	925	929	764	336	486	660	531	4720	3071	4226	1083	422	329	339	416	222	1046	498	494	710	352	455	199	400	401	309
OTU_2422	Annelida	Polychaeta	Spionida	Spionidae			90	Published	GCTATCGAGCGCAACCGCACATTCTGGAGGTTCTGTAGATTTAGCAATTTTTAGTTTACACTTATCTGGTGCATCTTCTATTTTAGGAGCTATCAATTTTATTTGTACAATTTTTAATATGCGAGTAAAAAGTTTATCTTTTCATAATTTACCATTATTTGTGTGGTCTGTTTTAATTACTGCTTTTTTATTGTTGTTATCATTG	0	9	17	7	4	2	2	0	0	6	3	1	1	3	1	3	3	0	2	0	5	19	1	0	0	0	1	0	1	0	0	0	1	1	0	0	0	0
OTU_2567	Annelida	Polychaeta	Spionida	Spionidae			90.15	Published	GCTATCAAGTGCAACTGCACATTCTGGAGGTTCTGTAGATTTAGCTATTTTTAGTTTACATTTATCTGGCGCGTCTTCTATTTTAGGGGCTATTAATTTTATTTGTACAATTTTTAATATGCGAGTAAAAAGTCTATCTTTTCATAATTTACCTTTATTTGTATGAGCTGTTTTAATTACTGCATTTTTGTTATTATTATCATTA	4	7	0	1	0	1	0	0	0	0	0	0	0	0	0	2	0	2	0	0	0	7	1	0	0	0	1	0	0	0	0	0	0	0	0	0	0	0
OTU_2621	Annelida	Polychaeta	Spionida	Spionidae			91.96	Published	TTTATCTAGCGCTACAGCTCATTCAGGTGGTGCTGTAGATTTAGCTATCTTTAGTTTACATTTATCAGGTGCGTCATCTATTTTAGGTGCTATTAATTTTATTTGTACAATTTTAATATGCGAGTGAAAAGTTTATCTTTCCGCAATCTTCCATTATTCGTATGATCTGTTTTAATTACAGCATTTTTATTGTTGTTATCATTG	283	294	535	118	83	34	50	57	30	100	74	31	86	51	63	23	59	64	43	185	152	275	39	6	11	5	3	13	39	25	12	39	20	24	9	14	22	15
OTU_2681	Annelida	Polychaeta	Spionida	Spionidae			90.5	Published	GTTGTCCAGTGCAACAGCTCACTCTGGCGGTTCTGTAGATTTAGCTATTTTCAGTTTACATTTATCAGGTGCGTCTTCTATTTTAGGTGCTATTAATTTTATTTGTACAATTTTTAATATGCGAGTAAAAAGTCTATCTTTCCATAATTTACCATTATTTGTGTGAGCTGTTTTAATTACTGCGTTTTTGTTATTATTATCATTA	22	109	156	47	13	13	14	15	17	48	19	5	28	23	24	9	12	23	27	0	37	83	0	0	0	0	0	0	3	5	0	3	2	0	0	0	7	3
OTU_2985	Annelida	Polychaeta	Spionida	Spionidae			90.5	Published	GCTATCAAGTGCAACTGCACATTCTGGAGGTTCTGTAGATTTAGCTATTTTTAGTTTACGTTTATCTGGTGCGTCTTCTATTTTAGGTGCTATTAATTTTATTTGTACAATTTTTAATATGCGAGTAAAAAGCCTATCTTTTCATAATTTACCATTGTTTGTATGATCTGTTTTAATTACAGCGTTTTTATTGTTGTTATCATTG	7	12	18	6	5	0	1	3	0	2	1	0	0	0	0	0	0	0	0	0	9	9	1	0	0	0	0	0	1	0	0	0	0	0	0	0	0	1
OTU_2996	Annelida	Polychaeta	Spionida	Spionidae			90.05	Published	ACTATCAAGTGCAACAGCACATTCCGGAGGTTCTGTAGATTTAGCTATTTTTAGTTTACACTTATCTGGTGCGTCTTCTATTTTAGGTGCTATTAATTTTATTTGTACAATTTTTAATGCGAGTAAAAAGTTTATCTTTTCACAATTTACCGTTATTTGTATGAGCTGTTTTAATTACTGCGTTTTTGTTATTATTATCTTTA	1	15	19	5	5	4	1	3	3	6	6	0	2	1	7	4	1	4	0	8	39	77	12	0	6	3	0	5	8	8	0	8	5	4	4	3	8	8
OTU_3050	Annelida	Polychaeta	Polychaeta				88.24	Published	TTTATCTAGGAATTTATCTCATAGTGGTCCAGCTGTAGACATAGCTATTTTTTCTCTTCACTTAGCTGGGGCCTCTTCTATTTTGGGTTCTATTAATTTTATATCAACTATTAAAAATATACGACCAAAAGAAATAAATCCAGAAAATATTCCATTATTCGTTTGGGCCGTATTAATTACTACGCTTCTTTTACTTCTTTCACTT	0	0	2	0	0	0	0	0	0	0	0	0	0	0	0	0	0	0	0	0	0	0	0	0	0	3	0	0	0	0	0	0	0	0	0	0	0	0
OTU_3468	Annelida	Polychaeta	Spionida	Spionidae			90.5	Published	GTTGTCCAGTGCAACAGCTCACTCCGGAGGTTCTGTAGATTTAGCTATTTTTAGTTTACATTTATCTGGTGCGTCTTCTATTTTAGGTGCTATTAATTTTATTTGTACAATTTTTAATATGCGAGTAAAAAGTCTATCTTTTCATAATTTACCATTGTTTGTATGAGCTGTTTTAATTACAGCATTTTTATTATTGTTATCGTTA	26	38	93	13	9	7	4	6	10	14	16	5	11	13	8	4	3	6	14	13	22	33	0	0	1	0	2	0	5	1	0	0	3	0	0	3	1	2
OTU_3488	Annelida	Polychaeta	Spionida	Spionidae			90.5	Published	GCTATCGAGCGCAACCGCACATTCTGGAGGTTCTGTAGATTTAGCCATATTTAGTTTACATTTATCAGGCGCATCGTCTATCTTAGGTGCTATTAATTTTATTTGTACAATTTTTAACATGCGAGTAAAAAGTTTATCTTTTCATAACCTTCCATTATTTGTATGGTCTGTTTTAATTACTGCTTTTTTATTGTTGTTATCATTG	0	3	6	3	4	2	2	2	0	7	2	0	3	0	0	4	0	2	1	0	0	4	0	0	0	0	0	0	0	0	0	0	0	0	0	0	0	0
OTU_3511	Annelida	Polychaeta	Spionida	Spionidae			90.5	Published	GCTATCGAGCGCAACCGCACATTCTGGTGGTTCTGTAGACTTAGCTATTTTTAGTTTACATTTATCAGGTGCGTCTTCTATTTTAGGGGCTATTAATTTTATTTGTACAATTTTTAATATGCGAGTAAAAAGTTTATCTTTTCATAATTTACCATTATTTGTGTGGCCTGTTTTAATTACTGCTTTTTTATTGTTGTTATCATTG	22	143	243	56	53	22	18	35	22	84	36	23	39	32	38	22	20	34	35	11	68	122	12	0	4	1	3	1	9	10	0	18	4	3	3	9	3	8
OTU_3518	Annelida	Polychaeta	Spionida	Spionidae			90.64	Published	ACTATCAAGTGCAACAGCACATTCCGGAGGTTCTGTAGATTTAGCTATCTTTAGTTTACATTTATCAGGTGCGTCATCTATTTTAGGTGCTATTAATTTTATTTGTACAATTTTTAATATGCGAGTAAAAAGTCTATCTTTTCATAATTTACCATTATTTGTATGAGCTGTTTTAATTACTGCGTTTTTATTATTACTATCATTA	9	23	46	12	7	5	5	1	3	11	10	1	5	6	8	4	2	11	6	0	50	93	11	0	3	2	5	2	5	5	0	11	8	1	5	8	10	4
OTU_3519	Annelida	Polychaeta	Spionida	Spionidae			90.15	Published	ATTATCAAGTGCAACTGCACATTCTGGTGGTTCTGTAGATTTAGCTATTTTTAGTTTACATTTATCAGGTGCGTCTTCTATTTTAGGGGCTATTAATTTTATTTGTACAATTTTTAATATGCGAGTAAAAAGTCTATCCTTTCATAATTTGCCATTATTTGTATGAGCTGTTTTAATTACTGCTTTTTTATTATTGTTATCGTTA	0	13	33	4	7	1	3	5	2	7	3	2	3	0	2	3	1	2	0	0	10	11	2	1	3	0	2	1	1	1	0	4	0	0	1	1	0	2
OTU_4227	Annelida	Polychaeta	Spionida	Spionidae			90	Published	TCTAGCAGATGCTAAATATCATTCAGGTGGTGCTGTAGATTTAGCTATTTTTAGTTTACATTTATCAGGTGCGTCATCTATTTTAGGTGCTATTAATTTTATTTGTACAATTTTTAATATGCGAGTGAAAAGTTTATCTTTCCACAATCTTCCATTATTCGTATGATCTGTTTTAATTACGGCATTTTTATTGTTATTATCTTTA	1	0	0	2	1	0	0	3	4	0	5	0	1	2	0	0	1	0	0	0	0	0	0	0	1	0	2	1	2	0	0	0	0	0	0	3	0	0
OTU_4534	Annelida	Polychaeta	Spionida	Spionidae			91	Published	GTTGTCCAGTGCAACAGCTCACTCTGGCGGTTCTGTAGATTTAGCAATATTTAGTTTACATTTATCAGGTGCGTCTTCTATTTTAGGGGCTATTAATTTTATTTGTACAATTTTTAATATGCGGGTAAAAAGTCTATCTTTTCATAATTTGCCATTATTTGTGTGGTCTGTTTTAATTACTGCTTTTTTATTGTTGTTATCATTG	6	30	68	11	15	13	4	11	2	21	7	2	7	10	6	9	5	7	8	0	8	29	0	0	0	0	0	0	0	2	0	2	0	0	0	2	0	0
OTU_4596	Annelida	Polychaeta	Spionida	Spionidae			90.5	Published	GCTATCGAGCGCAACCGCACATTCAGGTGGTGCTGTAGATTTAGCTATTTTTAGTTTACATTTATCAGGTGCGTCATCTATTTTAGGTGCTATTAATTTTATTTGTACAATTTTTAATATGCGAGTGAAAAGTTTATCTTTCCACAATCTTCCATTATTCGTATGATCTGTTTTAATTACTGCTTTTTTATTGTTGTTATCATTG	21	56	88	25	11	10	7	7	5	28	12	2	14	15	13	6	11	19	12	9	16	31	4	0	0	1	2	1	3	0	0	6	1	1	0	1	7	0
OTU_4657	Annelida	Polychaeta	Spionida	Spionidae			90.5	Published	GCTATCGAGCGCAACCGCACATTCTGGAGGTTCTGTAGATTTAGCTATATTTAGTTTACATTTATCAGGTGCGTCATCTATTTTAGGTGCCATTAACTTTATTTGTACAATCTTTAATATGCGAGTAAAAAGTTTATCTTTCCACAATCTTCCACTATTCGTATGGTCTGTTTTAATTACTGCTTTTTTATTGTTGTTATCATTG	0	12	14	2	2	0	1	0	0	9	2	0	0	0	0	0	4	1	1	0	0	6	0	0	0	0	1	0	0	1	0	0	0	0	0	0	1	0
OTU_4660	Annelida	Polychaeta	Spionida	Spionidae			91.24	Published	TTTATCTAGCGCTACAGCTCATTCAGGTGGTGCTGTAGATTTAGCTATTTTTAGTTTACATTTATCAGGTGCGTCATCTATTTTAGGTGCTATTAATTTTATTTGTACAATTTTTAATATGCGAGTGAAAAGTTTATCTTTCCACAATCTTCCATTATTCGTATGATCTGTTTTAATTACGGCATTTTTATTACTAACTACTTTG	11	13	23	8	7	3	1	6	1	8	4	1	6	3	6	5	3	0	3	5	19	41	7	0	1	0	0	1	0	3	0	11	1	0	1	2	5	3
OTU_4673	Annelida	Polychaeta	Polychaeta	Aeolosomatidae			90.69	Published	TTTATCTAGAAATTTATCCCATAGAGGTCCAGCAGTAGATATGGCCATTTTTTCTCTTCACTTAGCTGGTGCCTCTTCTATTTTAGGCTCTATTAATTTTATATCAACAATTAAAAATATGCGACCAAAAGAAATAAATCCAGAAAATATTCCATTATTTATTTGAGCAGTATTAATTACTACCCTTCTTTTACTTCTTTCACTC	0	0	0	0	0	0	0	0	0	3	0	0	0	0	0	0	0	0	0	0	0	0	0	0	0	0	0	0	0	0	0	0	0	0	0	0	0	0
OTU_4714	Annelida	Polychaeta	Spionida	Spionidae			91.13	Published	TTTATCTAGCGCTACAGCTCATTCTGGTGGTTCTGTAGACTTAGCTATTTTTAGTTTACATTTTATCAGGTGCGTCTTCTATTTTAGGGGCTATTAATTTTATTTGTACAATTTTTAATATGCGAGTAAAAAGTCTATCTTTTCATAATTTACCATTATTTGTATGAGCTGTTTTAATTACTGCGTTTTTGTTATTATTATCGTTA	2	4	10	3	1	1	0	0	0	0	0	0	1	3	1	1	0	1	2	0	0	14	0	0	0	0	0	1	0	0	0	0	0	0	0	0	0	2
OTU_4729	Annelida	Polychaeta	Spionida	Spionidae			90.64	Published	TTTATCAAGTGCAACAGCTCACTCTGGAGGTTCTGTAGATTTAGCAATATTTAGTTTACATTTATCAGGCGCATCGTCTATCTTAGGTGCTATTAATTTTATTTGTACAATTTTTAACATGCGAGTAAAAAGTTTATCTTTTCATAATTTACCATTGTTTGTATGAGCTGTTTTAATTACTGCGTTTTTATTATTACTATCATTA	0	0	0	0	0	0	0	0	0	0	0	0	0	0	0	0	0	0	0	0	5	0	0	0	0	0	0	0	0	0	0	0	0	0	0	0	0	0
OTU_4753	Annelida	Polychaeta	Spionida	Spionidae			90.64	Published	GCTATCGAGCGCAACCGCACATTCTGGAGGTTCTGTAGATTTAGCTATTTTTAGTTTACATTTATCAGGTGCGTCATCTATTTTAGGTGCTATTAATTTTATTTGTACAATTTTTAATATGCGAGTGAAAAGTTTATCTTTTCATAACCTTCCACTATTTGTATGATCTGTTTTAATTACAGCGTTTTTATTATTGTTGTCTTTA	31	87	140	36	15	9	16	28	13	39	13	6	23	25	23	6	17	26	9	12	16	42	5	0	0	0	0	0	4	0	0	5	3	0	0	3	1	2
OTU_4905	Annelida	Polychaeta	Spionida	Spionidae			90.64	Published	TTTATCAAGTGCAACAGCTCACTCTGGAGGTTCTGTTGATTTAGCCATATTTAGTTTACATTTATCAGGCGCATCGTCTATCTTAGGTGCTATTAATTTTATTTGTACAATTTTTAACATGCGAGTAAAAAGTTTATCTTTTCATAATTTACCATTATTTGTGTGGTCTGTTTTAATTACAGCATTTTTATTATTGTTATCGTTA	0	0	5	0	0	2	0	0	0	2	0	0	0	0	3	0	0	0	0	0	0	1	0	0	0	0	0	0	0	0	0	0	0	0	0	0	0	0
OTU_4924	Annelida	Polychaeta	Spionida	Spionidae			90.64	Published	TTTATCAAGTGCAACAGCTCATTCAGGTGGTGCTGTAGATTTAGCTATTTTTAGTTTACATTTATCAGGTGCGTCATCTATTTTAGGTGCTATTAATTTTATTTGTACAATTTTTAATATGCGAGTAAAAAGTCTATCTTTTCATAATTTACCATTATTTGTATGAGCTGTTTTAATTACTGCGTTTTTATTATTACTATCATTA	38	114	178	31	18	8	15	15	7	31	12	7	20	30	16	7	13	22	14	0	107	211	27	0	0	8	0	8	0	18	0	25	10	8	6	14	19	6
OTU_567	Platyhelminthes	Turbellaria	Catenulida				86.87	Published	TTTAGCATCTAATGTTTCTCATGCTGGACCAGCTGTTGATTGTGCTATTTTCTCATTACATCTGGCCGGGGCTTCTTCGATTATAAGATCAATTAATTTCATTACAACAATTGCTTATTTCCGAGGAGATAAAATGAAATGAGAAAGAGTTAGATTATTTGTTTGAGCTGTTTTAATTACAGTATTCTTACTTCTATTAAGTCTA	0	0	0	0	0	0	0	0	0	0	0	0	0	0	0	0	0	50	0	0	0	0	0	0	0	0	0	0	0	0	0	0	0	0	0	0	42	0
OTU_3096	Platyhelminthes	Turbellaria	Catenulida	Stenostomidae			94.95	Published	ACTATCGGGTAATGTTTCTCACGCCGGACCTGCTGTAGATTGTGCAATTTTCTCCTTACATTTGGCCGGTGCTTCATCTATTATGAGTTCAATCAATTTCATTACAACTATTTCATTTTTCCGAGGAGACAAAGTAAAATGAGAAAGAGTAAGTTTATTTGTTTGAGCAATTTTAATTACGGTCTTCTTGTTGTTACTTAGTTTA	0	0	0	0	0	0	1	0	0	0	0	0	0	0	0	0	0	0	0	0	0	0	0	0	0	0	0	0	0	0	0	0	0	0	0	0	0	0
OTU_2248	Arthropoda						99.02	Private	TCTTAGTACTCTTCAAAGTCATTCTGGAGGTTCTGTTGATCTTGCTATCTTTAGTCTTCATCTTGCTGGTATTAGTTCTATACTTGGTGCTATAAATTTTATTACTACTGTTCTTAATATACGTAATCCTGGTATAACTCTACATAATCTACCACTATTTTGTTGAGCAATCTTTGTAACTGCTATTCTACTACTACTTAGTCTA	0	0	0	0	1	0	0	0	0	0	0	0	0	0	0	0	0	0	0	0	0	0	0	0	0	0	0	0	0	0	0	0	0	0	0	0	0	0
