# Supplementary material for: Is it worth the extra mile? Comparing environmental DNA and RNA metabarcoding for vertebrate and invertebrate biodiversity surveys in a lowland stream
Source: PeerJ. 2024 Oct 24;12:e18016. doi: 10.7717/peerj.18016 (PMC11512801; doi:10.7717/peerj.18016)
Supplement: Supplemental Information 10 [file peerj-12-18016-s010.xlsx]

## Sheet: Sheet1
Class	Species	eRNA (detecion rate)	eDNA (detection rate)
Mammalia	Sus scrofa	10.53	15.79
Mammalia	Sciurus vulgaris	0	5.26
Mammalia	Rattus norvegicus	57.89	10.53
Mammalia	Ondatra zibethicus	89.47	31.58
Mammalia	Myotis daubentonii	21.05	0
Mammalia	Myocastor coypus	94.74	89.47
Mammalia	Microtus arvalis	78.95	52.63
Mammalia	Homo sapiens	52.63	94.74
Mammalia	Felis catus	0	5.26
Mammalia	Erinaceus europaeus	42.11	10.53
Mammalia	Castor fiber	78.95	42.11
Mammalia	Canis lupus	36.84	21.05
Mammalia	Bos taurus	94.74	100
Mammalia	Arvicola amphibius	15.79	0
Mammalia	Apodemus sylvaticus	15.79	10.53
Mammalia	Apodemus flavicollis	15.79	0
Aves	Turdus philomelos	10.53	5.26
Aves	Turdus merula	5.26	5.26
Aves	Sylvia borin	5.26	0
Aves	Podiceps cristatus	5.26	0
Aves	Passer domesticus/montanus	10.53	5.26
Aves	Gallus gallus	5.26	5.26
Aves	Fulica atra	57.89	10.53
Aves	Corvus corone	10.53	0
Aves	Columba palumbus	68.42	47.37
Aves	Ardea cinerea	10.53	0
Actinopteri	Vimba vimba / Blicca bjeorkna	94.74	94.74
Actinopteri	Vimba melanops	73.68	78.95
Actinopteri	Tinca tinca	73.68	15.79
Actinopteri	Squalius cephalus	94.74	100
Actinopteri	Silurus glanis	78.95	89.47
Actinopteri	Sander lucioperca	100	100
Actinopteri	Salmo salar	0	5.26
Actinopteri	Rutilus rutilus	100	100
Actinopteri	Pungitius pungitius	15.79	5.26
Actinopteri	Pseudorasbora parva	5.26	10.53
Actinopteri	Proterorhinus semilunaris	84.21	63.16
Actinopteri	Ponticola kessleri	89.47	94.74
Actinopteri	Platichthys flesus	10.53	0
Actinopteri	Perca fluviatilis	100	100
Actinopteri	Neogobius melanostomus	100	100
Actinopteri	Neogobius fluviatilis	57.89	15.79
Actinopteri	Leuciscus leuciscus/idus	84.21	78.95
Actinopteri	Leuciscus leuciscus	94.74	100
Actinopteri	Leuciscus aspius	84.21	94.74
Actinopteri	Lampetra fluviatilis/planeri	21.05	0
Actinopteri	Gobio gobio	5.26	36.84
Actinopteri	Gasterosteus aculeatus	100	100
Actinopteri	Esox lucius	73.68	36.84
Actinopteri	Cyprinus carpio	100	94.74
Actinopteri	Ctenopharyngodon idella	5.26	5.26
Actinopteri	Chondrostoma nasus	94.74	100
Actinopteri	Carassius auratus/gibelio	57.89	15.79
Actinopteri	Barbus barbus	100	100
Actinopteri	Barbatula barbatula	5.26	10.53
Actinopteri	Anguilla anguilla	100	100
Actinopteri	Alburnus alburnus	89.47	100
Actinopteri	Abramis brama	100	100
