# Supplementary material for: Is it worth the extra mile? Comparing environmental DNA and RNA metabarcoding for vertebrate and invertebrate biodiversity surveys in a lowland stream
Source: PeerJ. 2024 Oct 24;12:e18016. doi: 10.7717/peerj.18016 (PMC11512801; doi:10.7717/peerj.18016)
Supplement: Supplemental Information 11 [file peerj-12-18016-s011.xlsx]

## Sheet: Sheet1
Phylum	Species	eRNA (detection rate)	eDNA (detection rate)
Rotifera	Synchaeta tremula	10.53	5.26
Rotifera	Synchaeta stylata	78.95	78.95
Rotifera	Synchaeta pectinata	100	100
Rotifera	Synchaeta oblonga	100	100
Rotifera	Polyarthra vulgaris	100	100
Rotifera	Polyarthra dolichoptera	100	100
Rotifera	Philodina plena	5.26	5.26
Rotifera	Keratella cochlearis	94.74	94.74
Rotifera	Euchlanis dilatata	31.58	73.68
Rotifera	Brachionus quadridentatus	52.63	78.95
Rotifera	Brachionus calyciflorus	57.89	47.37
Rotifera	Brachionus budapestinensis	68.42	68.42
Porifera	Ephydatia fluviatilis	5.26	78.95
Mollusca	Unio tumidus	0	78.95
Mollusca	Theodoxus fluviatilis	5.26	31.58
Mollusca	Succinea putris	5.26	31.58
Mollusca	Physella acuta	15.79	26.32
Mollusca	Monacha cartusiana	78.95	100
Mollusca	Galba truncatula	10.53	26.32
Mollusca	Deroceras reticulatum	5.26	26.32
Mollusca	Ancylus fluviatilis	21.05	10.53
Cnidaria	Hydra vulgaris	10.53	94.74
Cnidaria	Hydra oligactis	0	10.53
Cnidaria	Hydra circumcincta	5.26	26.32
Cnidaria	Cordylophora caspia	0	15.79
Arthropoda	Xenylla mediterranea	21.05	47.37
Arthropoda	Trichoribates novus	0	5.26
Arthropoda	Trichoribates incisellus	0	5.26
Arthropoda	Tremulicerus fulgidus	10.53	31.58
Arthropoda	Tomocerus minor	0	10.53
Arthropoda	Tipula paludosa	10.53	84.21
Arthropoda	Tipula oleracea	0	5.26
Arthropoda	Tipula couckei	21.05	78.95
Arthropoda	Thrips tabaci	0	5.26
Arthropoda	Thienemanniella vittata	5.26	0
Arthropoda	Thermocyclops oithonoides	31.58	26.32
Arthropoda	Thermocyclops crassus	0	10.53
Arthropoda	Tanytarsus usmaensis	0	36.84
Arthropoda	Tanytarsus pallidicornis	0	10.53
Arthropoda	Tanytarsus medius	0	26.32
Arthropoda	Tanytarsus lestagei	0	31.58
Arthropoda	Tanytarsus heusdensis	42.11	84.21
Arthropoda	Tanytarsus eminulus	5.26	42.11
Arthropoda	Tanytarsus ejuncidus	5.26	15.79
Arthropoda	Tanytarsus brundini	31.58	89.47
Arthropoda	Tanytarsus bathophilus	5.26	21.05
Arthropoda	Tanypus punctipennis	0	5.26
Arthropoda	Sminthurinus elegans	26.32	42.11
Arthropoda	Skistodiaptomus pallidus	5.26	5.26
Arthropoda	Simulium lineatum	5.26	0
Arthropoda	Sida crystallina	0	5.26
Arthropoda	Sarcophaga haemorrhoides	5.26	15.79
Arthropoda	Rhopalosiphum padi	0	5.26
Arthropoda	Rhopalomyzus lonicerae	5.26	5.26
Arthropoda	Rheocricotopus fuscipes	0	5.26
Arthropoda	Rhagonycha fulva	0	5.26
Arthropoda	Psectrocladius limbatellus	0	5.26
Arthropoda	Procladius rufovittatus	0	5.26
Arthropoda	Procladius culiciformis	5.26	0
Arthropoda	Polypedilum scalaenum	5.26	36.84
Arthropoda	Polypedilum nubeculosum	36.84	73.68
Arthropoda	Polydrusus impressifrons	0	5.26
Arthropoda	Pleuroxus denticulatus	0	5.26
Arthropoda	Phaonia tuguriorum	5.26	0
Arthropoda	Phalangium opilio	0	5.26
Arthropoda	Parisotoma notabilis	0	5.26
Arthropoda	Paratanytarsus dissimilis	68.42	89.47
Arthropoda	Paralauterborniella nigrohalteralis	0	5.26
Arthropoda	Paracladopelma laminatum	5.26	0
Arthropoda	Orchesella villosa	0	15.79
Arthropoda	Oenopia conglobata	15.79	10.53
Arthropoda	Microtendipes pedellus	0	5.26
Arthropoda	Micropsectra atrofasciata	0	10.53
Arthropoda	Mesocyclops leuckarti	31.58	21.05
Arthropoda	Melanostoma scalare	5.26	0
Arthropoda	Megalothorax willemi	5.26	15.79
Arthropoda	Macropelopia nebulosa	10.53	47.37
Arthropoda	Longitarsus reichei	0	5.26
Arthropoda	Longitarsus dorsalis	0	10.53
Arthropoda	Lithobius curtipes	5.26	0
Arthropoda	Lionychus quadrillum	0	5.26
Arthropoda	Limnomysis benedeni	0	10.53
Arthropoda	Lepidocyrtus cyaneus	5.26	10.53
Arthropoda	Lamyctes africanus	0	5.26
Arthropoda	Lampyris noctiluca	0	5.26
Arthropoda	Laingia psammae	5.26	0
Arthropoda	Isotomurus plumosus	0	5.26
Arthropoda	Isotoma riparia	5.26	5.26
Arthropoda	Isotoma anglicana	5.26	21.05
Arthropoda	Hyalopterus pruni	5.26	0
Arthropoda	Hoplolabis areolata	5.26	0
Arthropoda	Heterocerus fenestratus	0	5.26
Arthropoda	Harpalus pumilus	10.53	10.53
Arthropoda	Harnischia fuscimana	0	5.26
Arthropoda	Gammarus pulex	5.26	10.53
Arthropoda	Gammarus fossarum	0	36.84
Arthropoda	Eurytemora velox	68.42	63.16
Arthropoda	Eurycercus lamellatus	0	5.26
Arthropoda	Eupteryx calcarata	0	5.26
Arthropoda	Eudiaptomus gracilis	5.26	10.53
Arthropoda	Eucyclops serrulatus	0	5.26
Arthropoda	Eriocheir sinensis	0	5.26
Arthropoda	Dicrotendipes nervosus	5.26	31.58
Arthropoda	Cryptochironomus rostratus	21.05	84.21
Arthropoda	Cricotopus vierriensis	0	36.84
Arthropoda	Cricotopus trifascia	5.26	0
Arthropoda	Cricotopus suspiciosus	5.26	5.26
Arthropoda	Cricotopus rufiventris	15.79	73.68
Arthropoda	Cricotopus bicinctus	0	15.79
Arthropoda	Corynoptera consumpta	0	5.26
Arthropoda	Corynoneura coronata	0	5.26
Arthropoda	Coenosia testacea	5.26	5.26
Arthropoda	Cloeon dipterum	0	5.26
Arthropoda	Cladotanytarsus mancus	21.05	94.74
Arthropoda	Cladotanytarsus atridorsum	5.26	5.26
Arthropoda	Chydorus sphaericus	5.26	5.26
Arthropoda	Chironomus melanescens	42.11	78.95
Arthropoda	Chironomus cingulatus	52.63	100
Arthropoda	Chironomus annularius	0	5.26
Arthropoda	Chaoborus flavicans	5.26	21.05
Arthropoda	Byrrhus pilula	5.26	42.11
Arthropoda	Brachystomella parvula	15.79	15.79
Arthropoda	Brachycaudus cardui	5.26	0
Arthropoda	Asyndetus latifrons	5.26	0
Arthropoda	Asteia beata	0	5.26
Arthropoda	Armadillidium vulgare	0	5.26
Arthropoda	Aphis oenotherae	5.26	15.79
Arthropoda	Aphis lugentis	5.26	5.26
Arthropoda	Anthicus flavipes	5.26	5.26
Arthropoda	Aculodes mckenziei	5.26	5.26
Arthropoda	Acanthocyclops robustus	15.79	10.53
Arthropoda	Acanthocyclops americanus	68.42	63.16
Arthropoda	Acalypta parvula	0	5.26
Arthropoda	Abacarus hystrix	0	42.11
Annelida	Uncinais uncinata	0	5.26
Annelida	Tubifex tubifex	5.26	10.53
Annelida	Stylodrilus heringianus	10.53	5.26
Annelida	Stylaria lacustris	84.21	73.68
Annelida	Psammoryctides barbatus	5.26	5.26
Annelida	Ophidonais serpentina	15.79	15.79
Annelida	Nais christinae	26.32	15.79
Annelida	Lumbricus terrestris	5.26	63.16
Annelida	Lumbricus rubellus	5.26	26.32
Annelida	Limnodrilus hoffmeisteri	5.26	10.53
Annelida	Hypania invalida	84.21	89.47
Annelida	Enchytraeus bulbosus	15.79	47.37
Annelida	Enchytraeus buchholzi	5.26	10.53
Annelida	Eiseniella tetraedra	0	5.26
Annelida	Dendrobaena veneta	5.26	5.26
Annelida	Chaetogaster diastrophus	5.26	15.79
Annelida	Chaetogaster diaphanus	5.26	0
Annelida	Chaetogaster cristallinus	15.79	15.79
Annelida	Bothrioneurum vejdovskyanum	0	5.26
Annelida	Aporrectodea rosea	5.26	0
Annelida	Aporrectodea caliginosa	5.26	31.58
Annelida	Allolobophora chlorotica	84.21	94.74
