# Supplementary material for: Is it worth the extra mile? Comparing environmental DNA and RNA metabarcoding for vertebrate and invertebrate biodiversity surveys in a lowland stream
Source: PeerJ. 2024 Oct 24;12:e18016. doi: 10.7717/peerj.18016 (PMC11512801; doi:10.7717/peerj.18016)
Supplement: Supplemental Information 12 [file peerj-12-18016-s012.xlsx]

## Sheet: 2016-2019
#	Species	Δ eRNA-eDNA detection probability (%)	Δ downstream-upstream specimen numbers (%)
39	Platichthys flesus	-10.53	-100
32	Sander luciperca	0	-100
52	Chondrostoma nasus	5.26	-100
42	Neogobius fluviatilis	-42.1	-99.1342
29	Tinca tinca	-57.89	-92.3077
50	Cyprinus carpio	-5.26	-57.1429
40	Perca fluviatilis	0	-39.4393
36	Pseudorasbora parva	5.27	-20
38	Ponticola kessleri	5.27	-14.2857
49	Esox lucius	-36.84	0
45	Leuciscus aspius	10.53	0
56	Anguilla anguilla	0	17.5141
31	Silurus glanis	10.52	20
41	Neogobius melanostomus	0	22.6219
37	Proterorhinus semilunaris	-21.05	29.3355
34	Rutilus rutilus	0	40.8935
44	Leuciscus leuciscus	5.26	49.2958
48	Gasterosteus aculeatus	0	56.4626
30	Squalius cephalus	5.26	56.9791
57	Alburnus alburnus	10.53	74.4681
58	Abramis brama	0	80
54	Barbus barbus	0	92.5466
47	Gobio gobio	31.58	95.5556
55	Barbatula barbatula	5.27	98.9899

## Sheet: all_2016-2019
German Species Name	Species	Strecke2 2019	Strecke2 2016	Renaturierung 2019	Renaturierung 2016	Aue 2019	Aue 2016	Strecke4, 2019	Strecke4, 2019	lip-01-31, 2018	lip-01-31, 2015	lip-01-52, 2015	lip-01-52, 2018	Rel. Downstream	Rel. Upstream	eRNA	eDNA	Δ eRNA/eDNA detection probability (%)	Δ downstream/upstream specimen numbers (%)
Aal	Anguilla anguilla	43	9	9	2	8	2	16	13	8	6	39	22	41.2429	58.7571	100	100	0	17.5141
Aland	Leuciscus idus	45	1	1	0	25	4	11	3	0	0	5	11
Bach-/Flussneunauge	Lampetra planeri / fluviatilis	0	0	0	1	0	8	0	0	15	14	7	39	10.7143	89.2857	21.05	0	-21.05	78.5714
Bachforelle	Salmo trutta	0	0	0	0	0	0	0	0	0	0	0	1
Barbe	Barbus barbus	5	1	0	0	0	0	8	0	6	1	68	72	3.72671	96.2733	100	100	0	92.5466
Bitterling	Rhodeus amarus	0	0	0	0	33	0	0	1	50	13	0	0
Blaubandbärbling	Pseudorasbora parva	0	0	0	0	0	3	2	0	0	0	0	0	60	40	5.26	10.53	5.27	-20
Brachse	Abramis brama	0	0	1	0	1	0	0	0	0	0	3	15	10	90	100	100	0	80
Döbel	Squalius cephalus	33	1	4	0	112	169	362	77	153	105	204	263	21.5105	78.4895	94.74	100	5.26	56.9791
Dreist. Stichling	Gasterosteus aculeatus	15	29	13	1	1	5	72	75	50	10	14	9	21.7687	78.2313	100	100	0	56.4626
Flunder	Platichthys flesus	0	0	1	0	0	0	0	0	0	0	0	0	100	0	10.53	0	-10.53	-100
Flussbarsch	Perca fluviatilis	22	112	44	1	140	54	27	13	34	11	25	52	69.7196	30.2804	100	100	0	-39.4393
Flussgrundel	Neogobius fluviatilis	0	0	0	1	180	49	1	0	0	0	0	0	99.5671	0.4329	57.89	15.79	-42.1	-99.1342
Giebel	Carassius gibelio	0	0	0	0	58	2	0	0	0	0	0	0	100	0	57.89	15.79	-42.1	-100
Gründling	Gobio gobio	0	0	1	0	1	2	10	2	24	7	56	77	2.22222	97.7778	5.26	36.84	31.58	95.5556
Güster	Blicca bjoerkna	0	0	0	0	2	0	3	0	0	0	0	0
Hasel	Leuciscus leuciscus	1	0	0	0	31	4	31	21	2	0	11	41	25.3521	74.6479	94.74	100	5.26	49.2958
Hecht	Esox lucius	0	0	0	0	1	1	1	1	0	0	0	0	50	50	73.68	36.84	-36.84	0
Karpfen	Cyprinus carpio	1	0	0	0	21	0	0	0	0	2	1	3	78.5714	21.4286	100	94.74	-5.26	-57.1429
Kaulbarsch	Gymnocephalus cernua	2	1	0	0	0	0	0	0	8	0	0	0
Kesslergrundel	Ponticola kessleri	14	2	1	0	0	3	4	3	5	3	0	0	57.1429	42.8571	89.47	94.74	5.27	-14.2857
Marmorierte Grundel	Proterorhinus semilunaris	29	8	24	2	106	49	83	42	117	35	27	95	35.3323	64.6677	84.21	63.16	-21.05	29.3355
Meerneunauge	Petromyzon marinus	0	0	0	0	0	1	0	0	0	0	0	0
Moderlieschen	Leucaspius delineatus	0	0	0	0	0	0	30	0	0	0	0	108
Quappe	Lota lota	0	0	0	0	0	0	0	0	0	0	0	9
Nase	Chondrostoma nasus	0	0	7	0	0	0	0	0	0	0	0	0	100	0	94.74	100	5.26	-100
Rapfen	Leuciscus aspius	0	0	1	0	1	0	2	0	0	0	0	0	50	50	84.21	94.74	10.53	0
Rotauge	Rutilus rutilus	79	31	8	1	47	6	25	49	41	7	151	137	29.5533	70.4467	100	100	0	40.8935
Rotfeder	Scardinius erythrophthalmus	0	0	0	0	1	2	0	0	0	0	0	0
Schleie	Tinca tinca	0	0	0	0	50	0	0	0	0	0	0	2	96.1538	3.84615	73.68	15.79	-57.89	-92.3077
Schmerle	Barbatula barbatula	0	0	0	0	0	1	0	1	0	1	51	144	0.505051	99.4949	5.26	10.53	5.27	98.9899
Schwarzmund-Grundel	Neogobius melanostomus	721	363	432	30	436	137	807	358	539	189	617	848	38.6891	61.3109	100	100	0	22.6219
Sonnenbarsch	Lepomis gibbosus	0	0	0	0	5	0	0	0	0	0	0	4
Ukelei	Alburnus alburnus	0	1	0	0	0	5	0	0	29	0	7	5	12.766	87.234	89.47	100	10.53	74.4681
Wels	Silurus glanis	2	0	0	0	0	0	0	0	0	0	0	3	40	60	78.95	89.47	10.52	20
Zander	Sander luciperca	1	0	2	0	2	0	0	0	0	0	0	0	100	0	100	100	0	-100
