# Supplementary material for: Is it worth the extra mile? Comparing environmental DNA and RNA metabarcoding for vertebrate and invertebrate biodiversity surveys in a lowland stream
Source: PeerJ. 2024 Oct 24;12:e18016. doi: 10.7717/peerj.18016 (PMC11512801; doi:10.7717/peerj.18016)
Supplement: Supplemental Information 13 [file peerj-12-18016-s013.xlsx]

## Sheet: eDNA
ID_ART	TAXON_NAME	sample_1	sample_10	sample_11	sample_12	sample_13	sample_14	sample_15	sample_16	sample_17	sample_18	sample_19	sample_2	sample_3	sample_4	sample_5	sample_6	sample_7	sample_8	sample_9
Gewässertyp		15	15	15	15	15	15	15	15	15	15	15	15	15	15	15	15	15	15	15
Taxaliste		original	original	original	original	original	original	original	original	original	original	original	original	original	original	original	original	original	original	original
Nutzung		keine	keine	keine	keine	keine	keine	keine	keine	keine	keine	keine	keine	keine	keine	keine	keine	keine	keine	keine
7077	Tipula sp.	1	1	0	0	1	0	0	0	0	0	0	0	1	0	0	0	0	1	0
9322	Syrphidae Gen. sp.	0	0	0	0	0	0	0	0	0	0	0	0	0	1	0	0	0	0	0
8483	Limoniidae Gen. sp.	0	1	0	0	0	0	0	0	0	0	0	0	0	0	0	0	0	0	0
4310	Ancylus fluviatilis	0	0	0	0	1	0	0	0	0	1	0	1	1	0	0	0	0	0	0
8661	Physella sp.	0	0	0	0	0	0	0	0	0	0	0	1	1	0	0	0	0	1	0
11178	Corbicula sp.	1	1	0	0	1	1	0	0	1	0	1	1	1	1	1	0	0	0	1
7852	Simulium lineatum	1	0	0	0	0	0	0	0	0	0	0	0	0	0	0	0	0	0	0
6935	Stylodrilus heringianus	0	0	0	0	0	0	0	0	0	0	0	0	1	0	0	0	0	1	0
8846	Spongillidae Gen. sp.	0	0	0	0	0	0	0	0	0	0	0	1	0	0	0	0	0	0	0
5101	Enchytraeidae Gen. sp.	0	1	1	0	1	0	0	0	0	0	0	0	1	1	0	0	0	1	1
5291	Gammarus pulex	0	0	0	0	0	0	0	0	0	0	0	0	0	0	1	0	0	0	0
8427	Dolichopodidae Gen. sp.	0	0	0	0	0	1	0	0	0	0	0	0	0	0	0	0	0	0	0
6934	Stylaria lacustris	1	1	1	0	0	1	1	1	1	1	1	1	1	1	1	1	0	1	1
4630	Chaoboridae Gen. sp.	0	0	0	0	0	0	1	0	0	0	0	0	0	0	0	0	0	0	0
4642	Chironomidae Gen. sp.	1	1	1	1	1	1	1	1	1	1	0	1	1	1	1	1	1	1	1
5284	Galba truncatula	0	0	0	0	0	0	0	0	0	0	1	1	0	0	0	0	0	0	0
7025	Theodoxus fluviatilis	0	0	0	0	0	0	0	0	1	0	0	0	0	0	0	0	0	0	0
