# Supplementary material for: Is it worth the extra mile? Comparing environmental DNA and RNA metabarcoding for vertebrate and invertebrate biodiversity surveys in a lowland stream
Source: PeerJ. 2024 Oct 24;12:e18016. doi: 10.7717/peerj.18016 (PMC11512801; doi:10.7717/peerj.18016)
Supplement: Supplemental Information 14 [file peerj-12-18016-s014.xlsx]

## Sheet: eDNA
ID_ART	TAXON_NAME	sample_1	sample_10	sample_11	sample_12	sample_13	sample_14	sample_15	sample_16	sample_17	sample_18	sample_19	sample_2	sample_3	sample_4	sample_5	sample_6	sample_7	sample_8	sample_9
Gewässertyp		15	15	15	15	15	15	15	15	15	15	15	15	15	15	15	15	15	15	15
Taxaliste		original	original	original	original	original	original	original	original	original	original	original	original	original	original	original	original	original	original	original
Nutzung		keine	keine	keine	keine	keine	keine	keine	keine	keine	keine	keine	keine	keine	keine	keine	keine	keine	keine	keine
4705	Cloeon dipterum	0	0	0	0	0	0	0	0	0	0	0	0	0	0	0	0	0	1	0
5288	Gammarus fossarum	0	0	0	1	0	0	1	0	1	0	0	0	1	0	1	1	0	0	1
5101	Enchytraeidae Gen. sp.	0	1	1	1	0	1	1	1	0	1	0	1	1	1	1	0	1	1	1
4642	Chironomidae Gen. sp.	1	1	1	1	1	1	1	1	1	1	1	1	1	1	1	1	1	1	1
7025	Theodoxus fluviatilis	0	0	1	0	1	1	0	0	1	0	0	0	1	0	0	1	0	0	0
7077	Tipula sp.	1	1	1	1	1	1	1	1	0	1	1	1	1	1	1	1	1	1	1
4310	Ancylus fluviatilis	0	0	0	0	0	0	0	0	0	0	0	0	0	1	0	0	1	0	0
4743	Cordylophora caspia	1	0	0	0	0	0	0	0	0	0	0	1	0	1	0	0	0	0	0
8846	Spongillidae Gen. sp.	1	1	1	0	1	1	1	0	1	1	0	1	1	1	0	1	1	1	1
7138	Unio sp.	0	1	0	1	1	1	1	1	1	1	1	1	0	1	1	1	1	1	0
5291	Gammarus pulex	0	0	1	0	0	0	0	0	0	0	0	0	1	0	0	0	0	0	0
11178	Corbicula sp.	1	1	1	1	1	1	1	1	1	1	1	1	1	1	1	1	1	1	1
17507	Anacaena sp.	0	0	0	0	0	0	1	0	0	0	0	0	0	0	0	0	0	0	0
8661	Physella sp.	0	1	0	0	0	0	0	0	0	0	0	1	0	1	1	0	0	0	1
5075	Eiseniella tetraedra	0	0	0	0	0	0	0	0	0	0	0	0	0	0	0	0	1	0	0
6934	Stylaria lacustris	1	1	0	1	0	1	1	0	0	1	0	1	1	1	1	1	1	1	1
6935	Stylodrilus heringianus	0	0	0	0	0	0	0	0	0	0	0	0	0	0	0	0	1	0	0
4630	Chaoboridae Gen. sp.	0	0	0	1	0	0	0	0	1	0	0	0	0	1	0	0	1	0	0
5284	Galba truncatula	0	1	0	0	0	0	0	0	0	0	1	0	0	1	1	1	0	0	0
